# Supplementary material for: Severe COVID-19 Is Characterised by Perturbations in Plasma Amines Correlated with Immune Response Markers, and Linked to Inflammation and Oxidative Stress
Source: MDPI journal article supplement (doi:10.3390/metabo12070618), 2022-07-02

## CXCL10

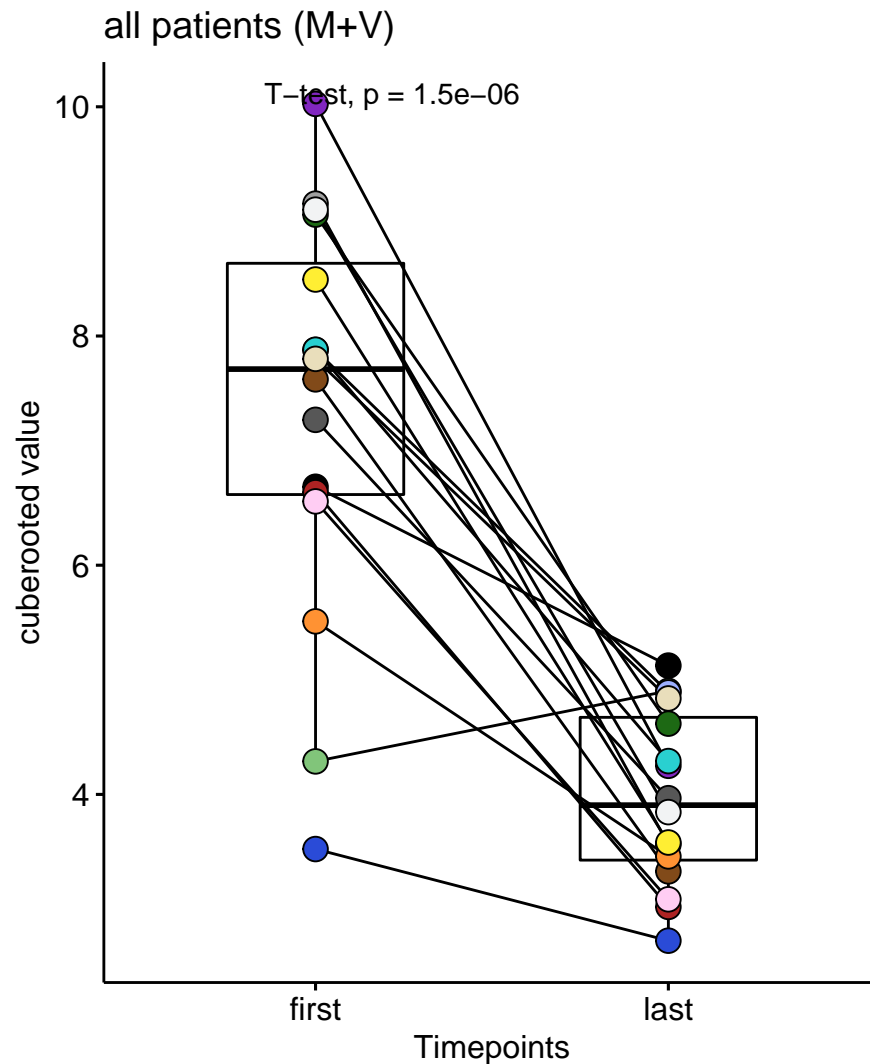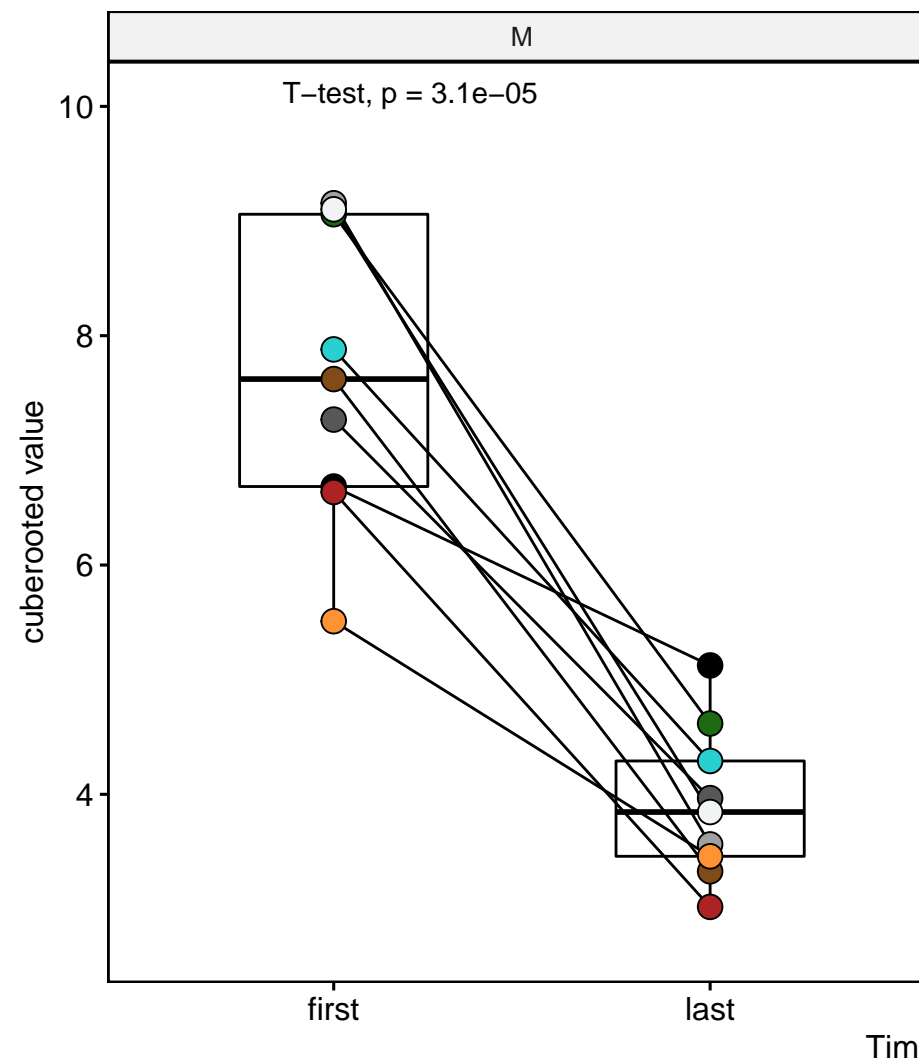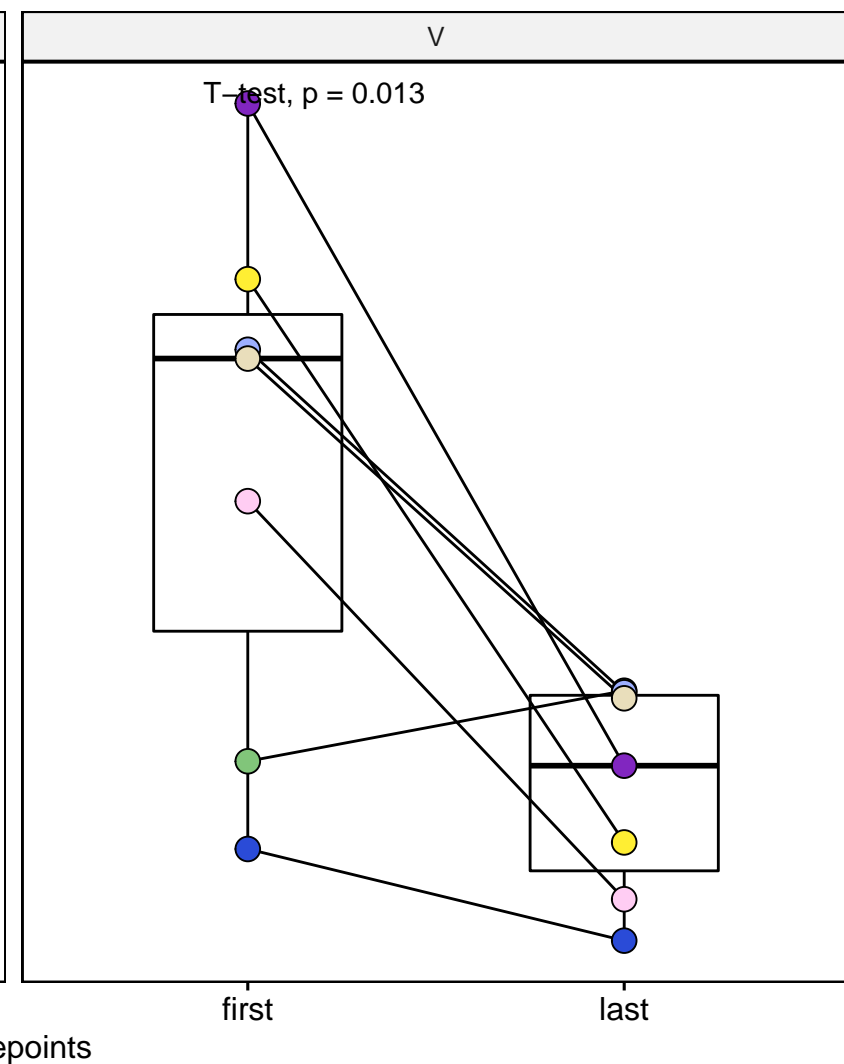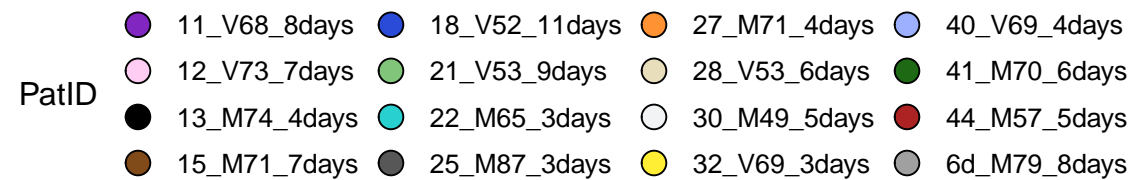

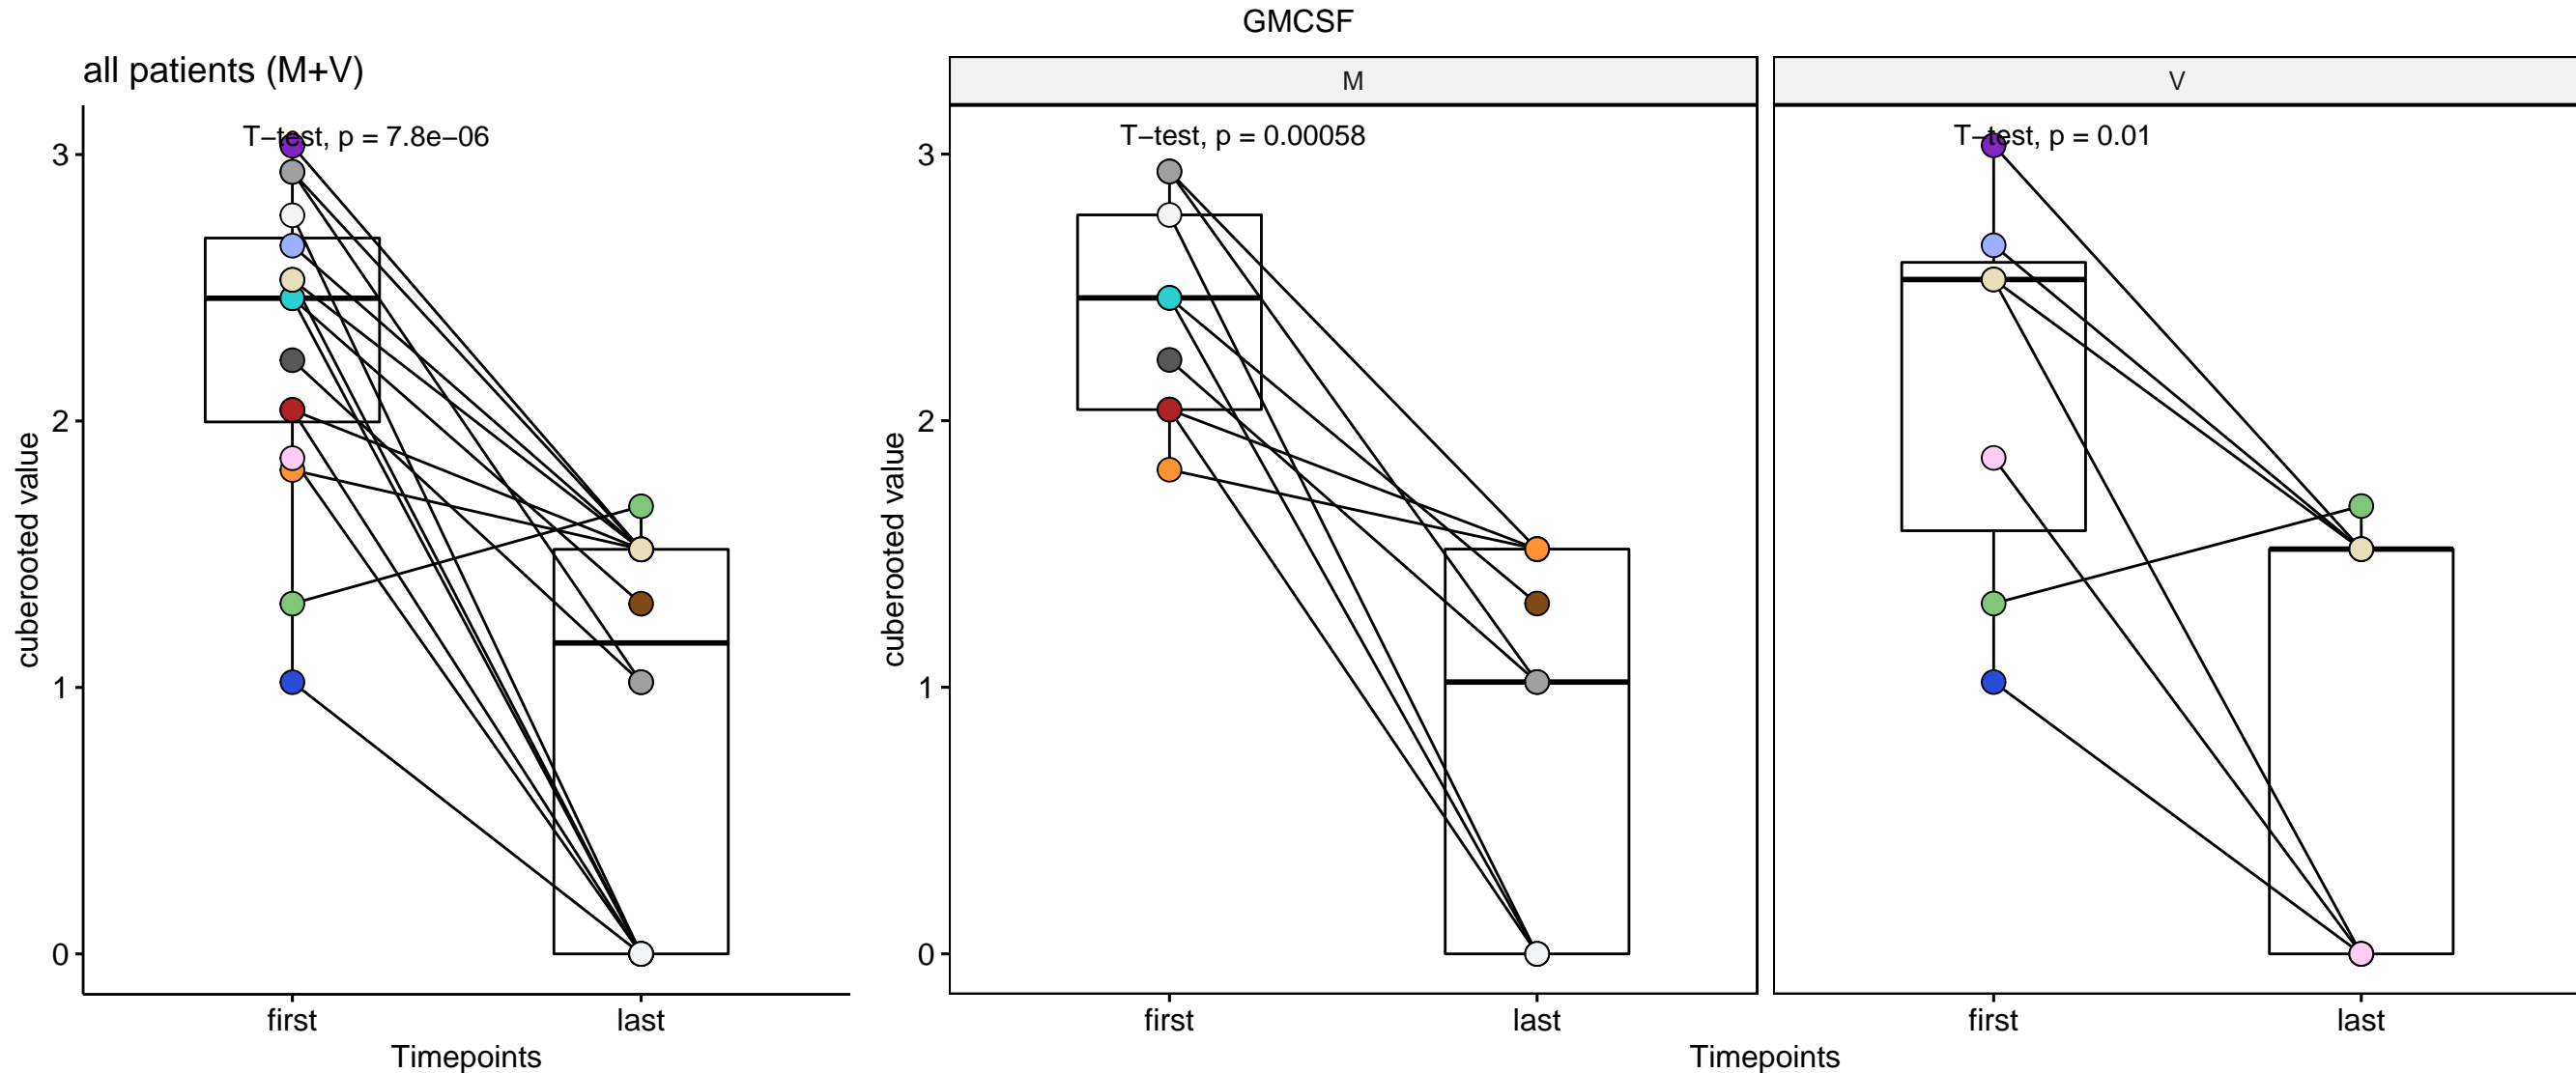

# Putrescine\_amines

all patients (M+V)

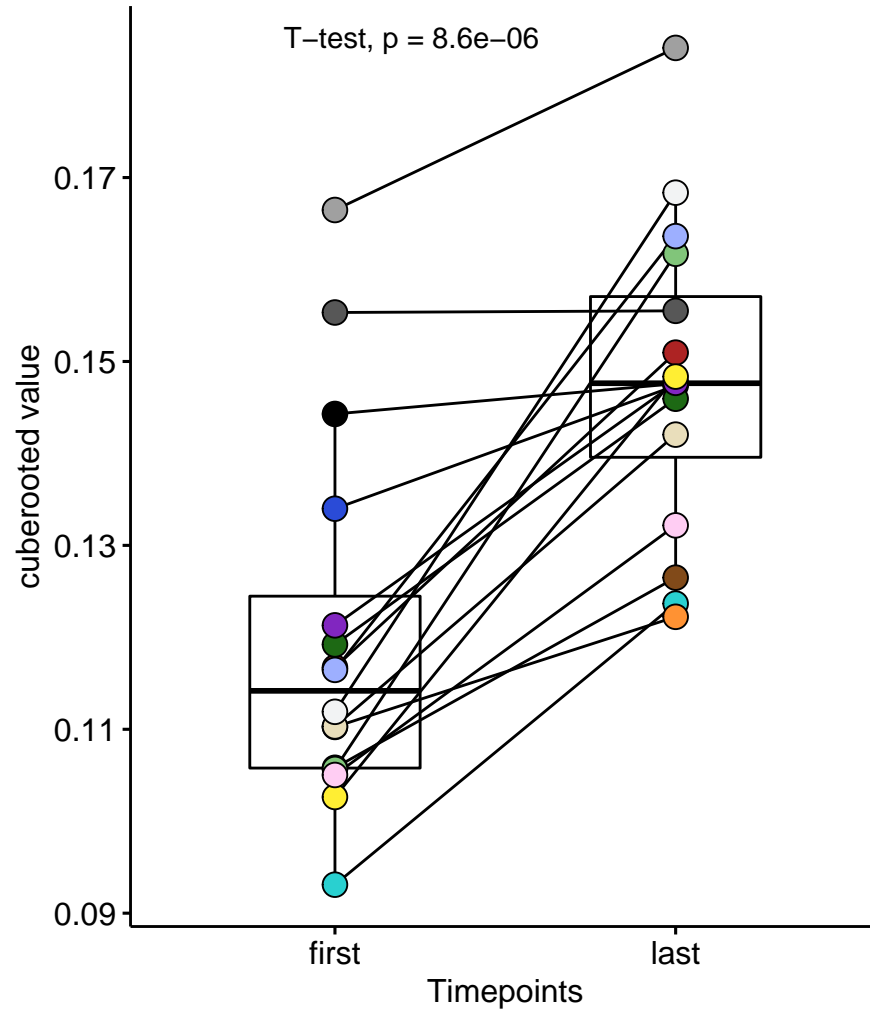

PatID

|              |               |              |              |
|--------------|---------------|--------------|--------------|
| 11_V68_8days | 18_V52_11days | 27_M71_4days | 40_V69_4days |
| 12_V73_7days | 21_V53_9days  | 28_V53_6days | 41_M70_6days |
| 13_M74_4days | 22_M65_3days  | 30_M49_5days | 44_M57_5days |
| 15_M71_7days | 25_M87_3days  | 32_V69_3days | 6d_M79_8days |

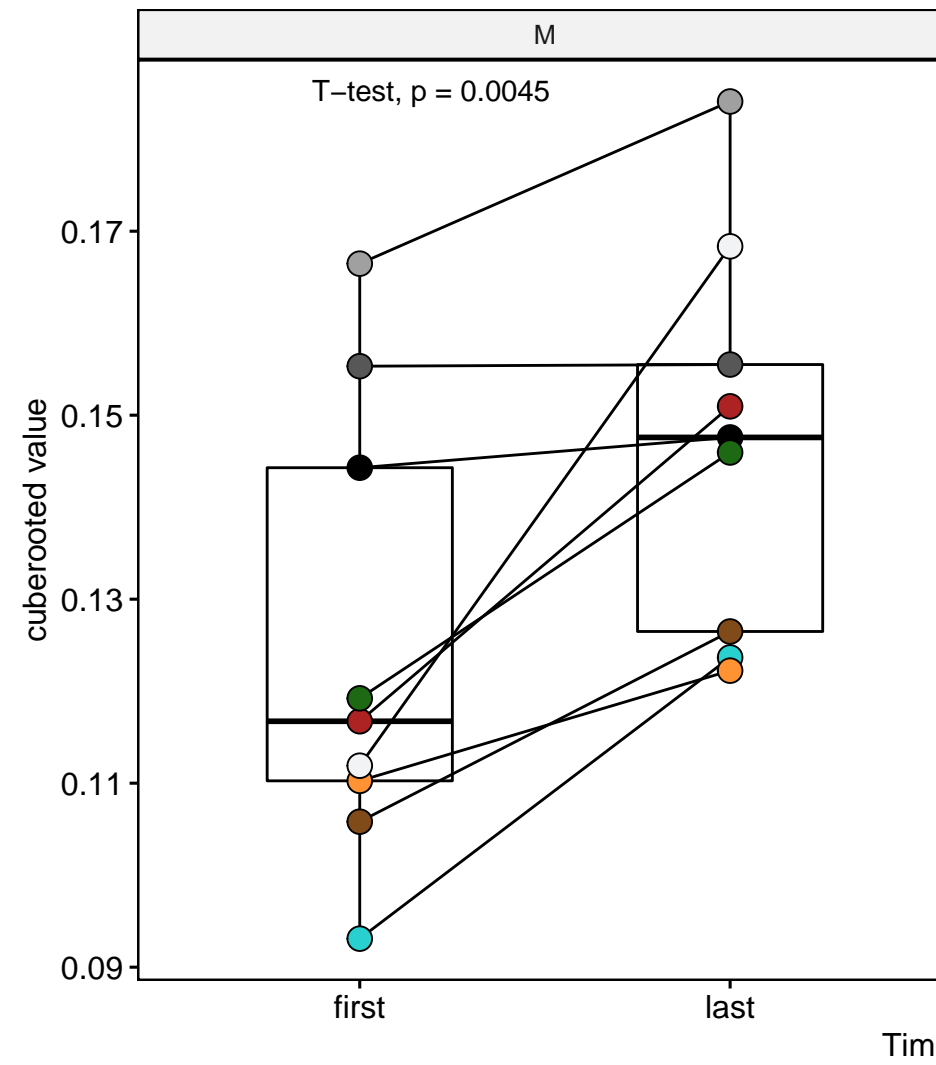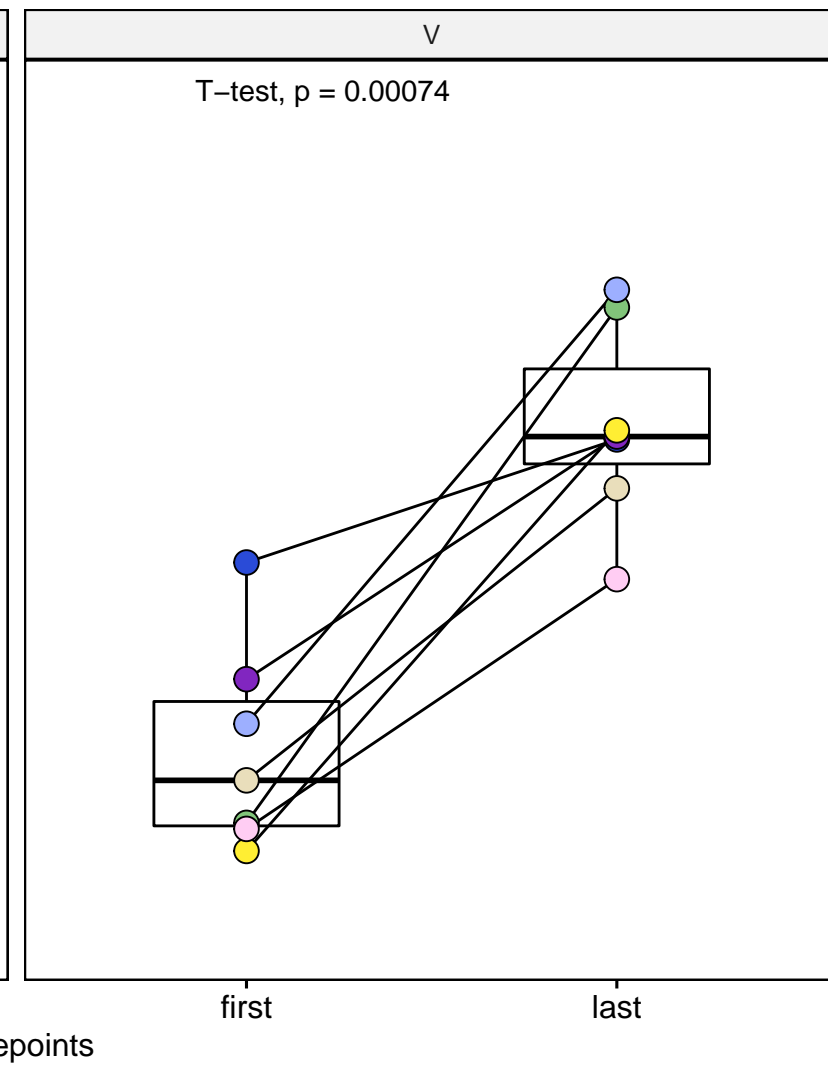

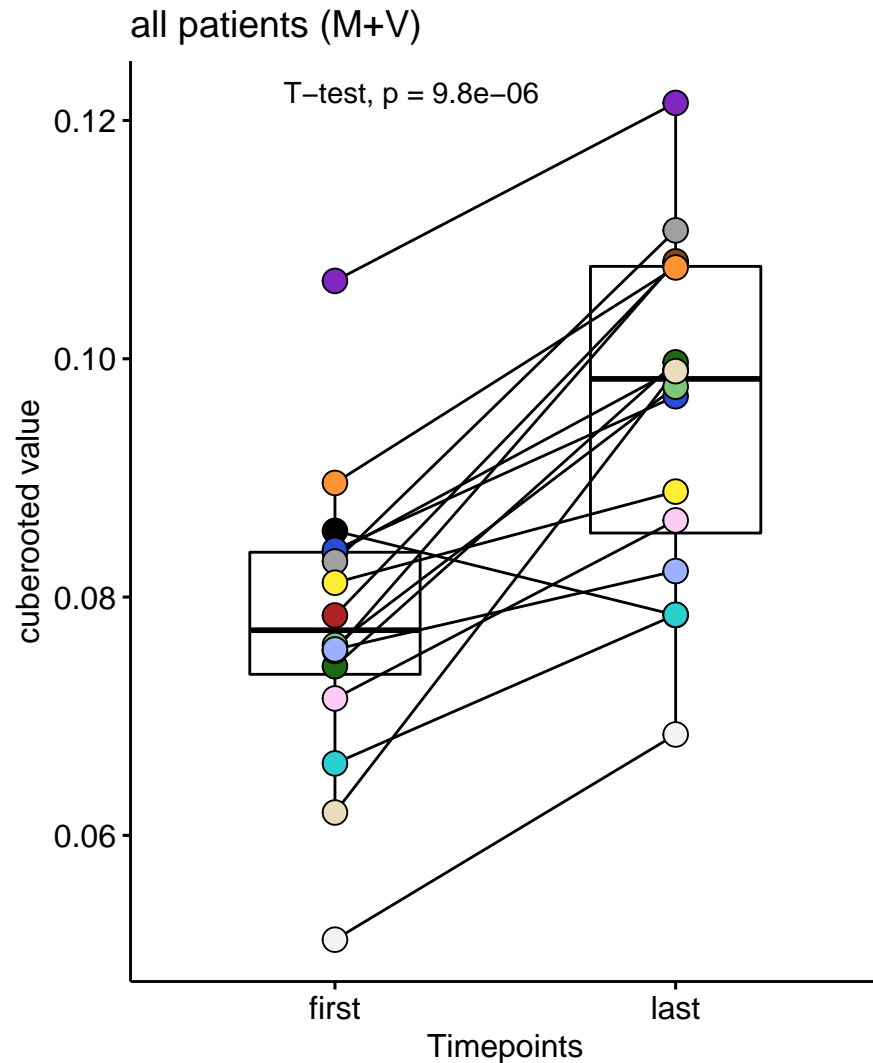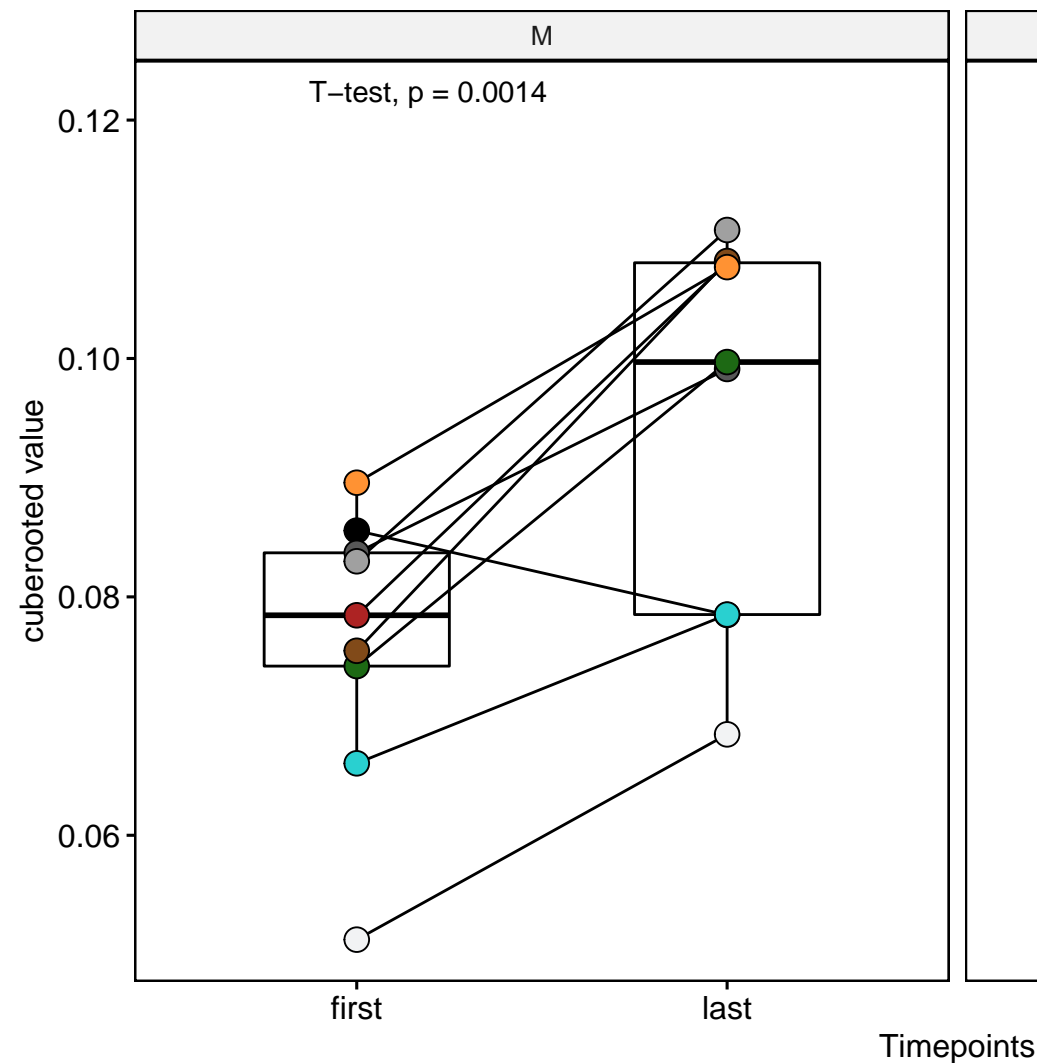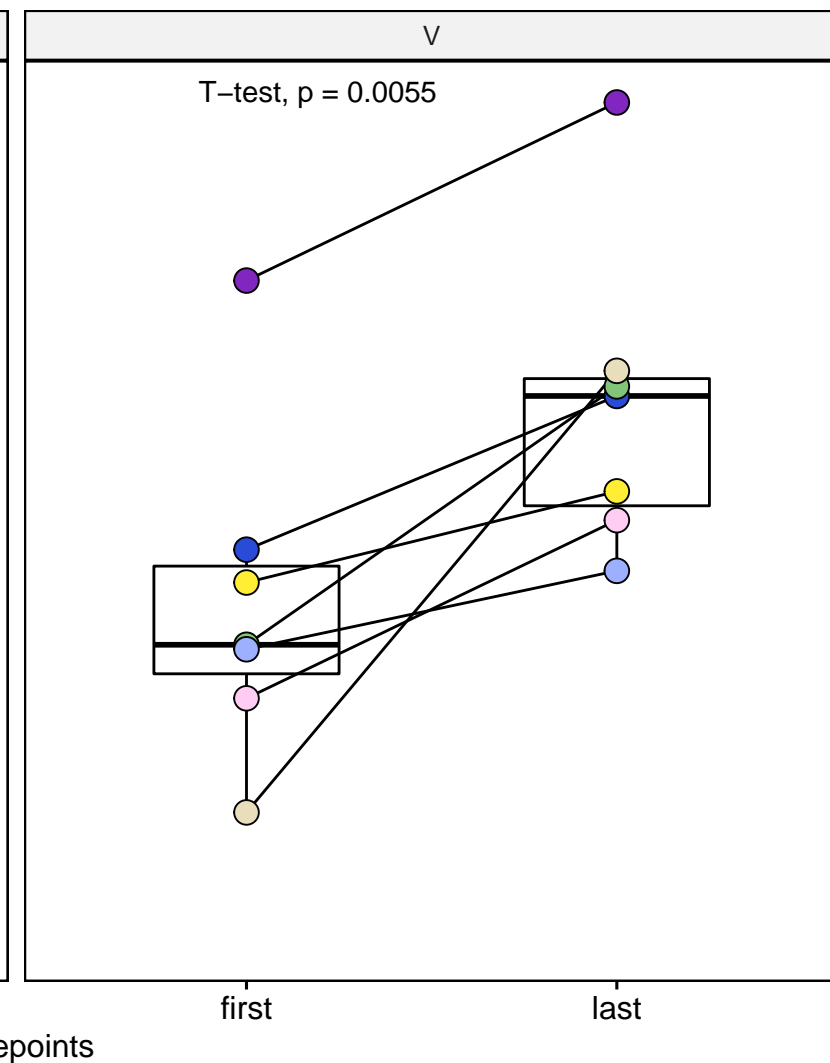

PatID

|              |               |              |              |
|--------------|---------------|--------------|--------------|
| 11_V68_8days | 18_V52_11days | 27_M71_4days | 40_V69_4days |
| 12_V73_7days | 21_V53_9days  | 28_V53_6days | 41_M70_6days |
| 13_M74_4days | 22_M65_3days  | 30_M49_5days | 44_M57_5days |
| 15_M71_7days | 25_M87_3days  | 32_V69_3days | 6d_M79_8days |

# Glycine\_amines

all patients (M+V)

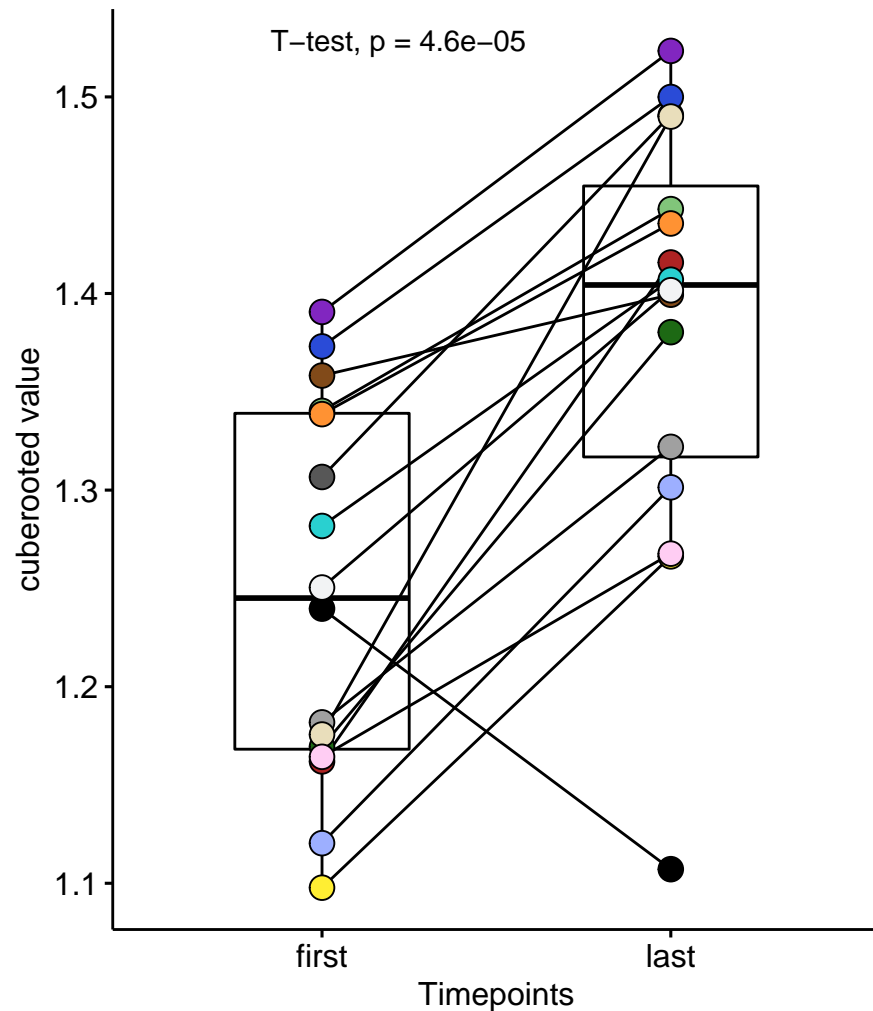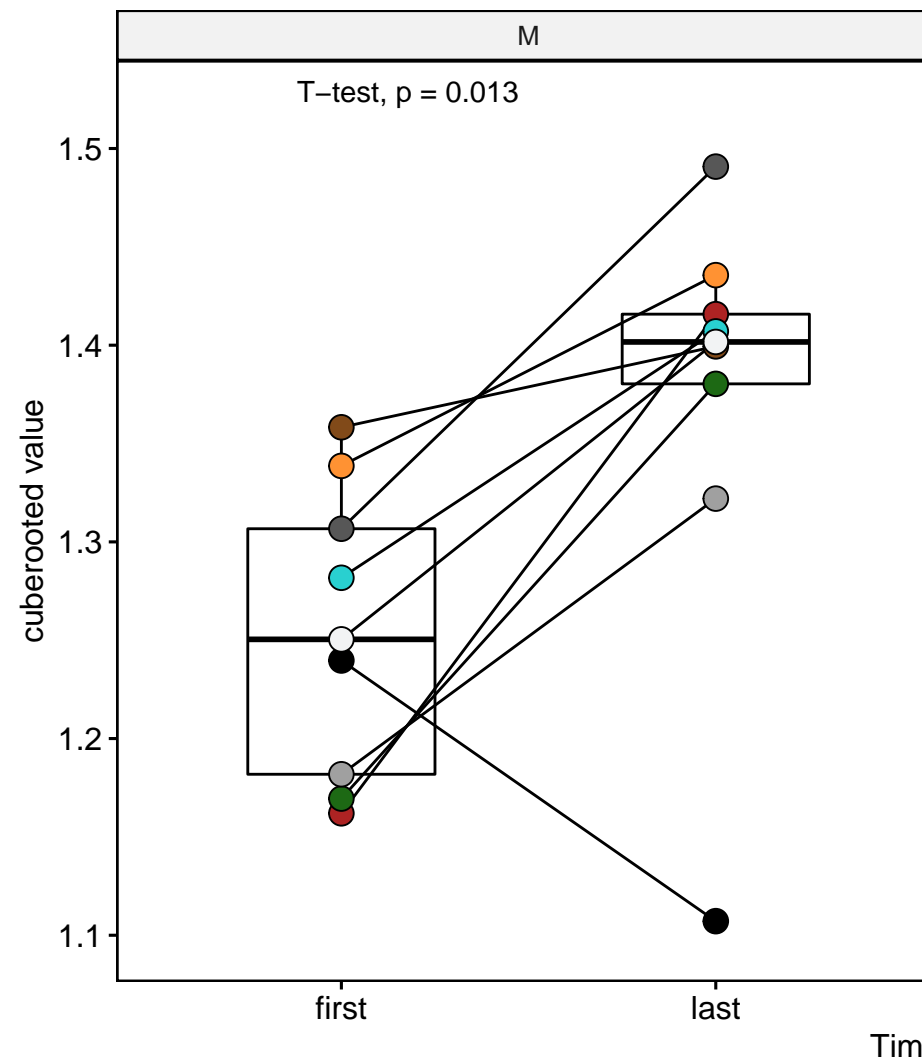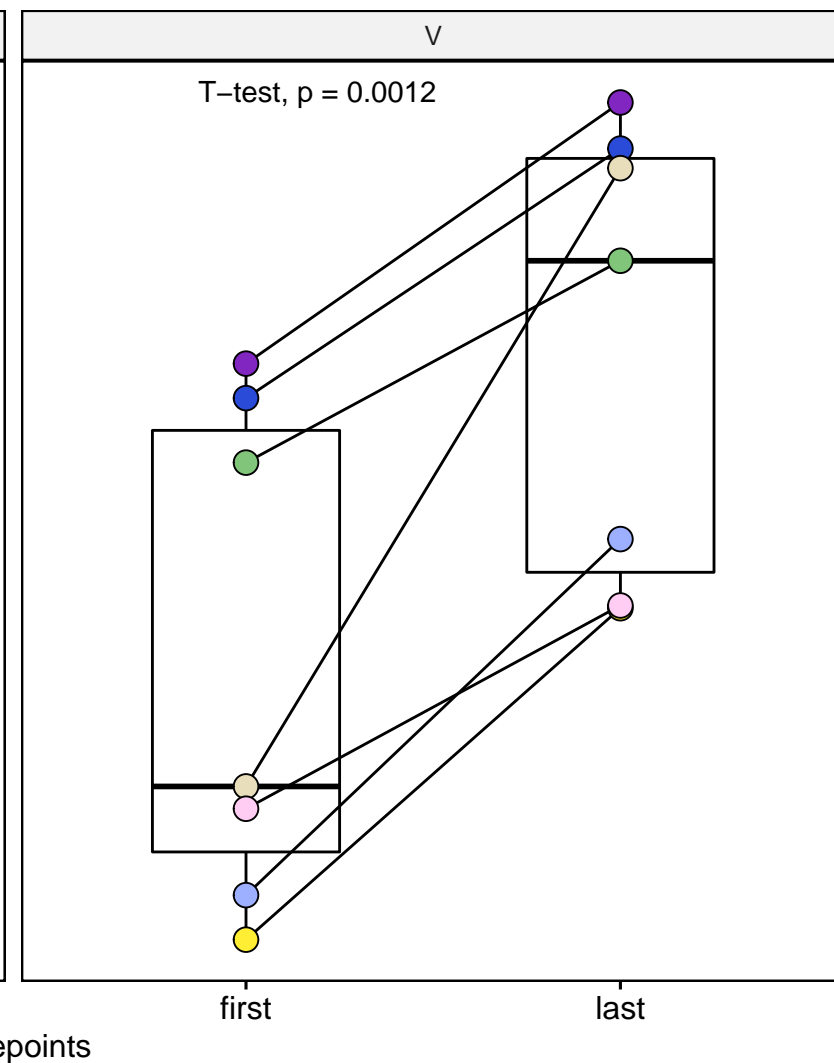

all patients (M+V)

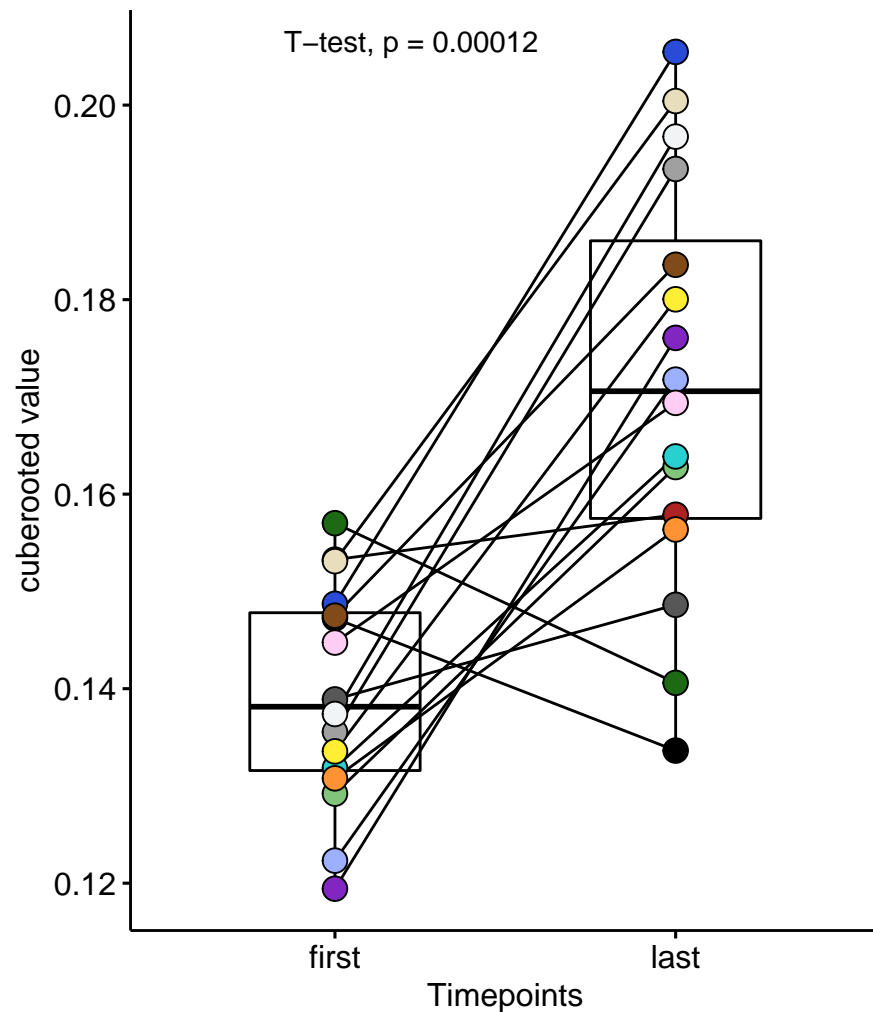

PatID

|              |               |              |              |
|--------------|---------------|--------------|--------------|
| 11_V68_8days | 18_V52_11days | 27_M71_4days | 40_V69_4days |
| 12_V73_7days | 21_V53_9days  | 28_V53_6days | 41_M70_6days |
| 13_M74_4days | 22_M65_3days  | 30_M49_5days | 44_M57_5days |
| 15_M71_7days | 25_M87_3days  | 32_V69_3days | 6d_M79_8days |

M

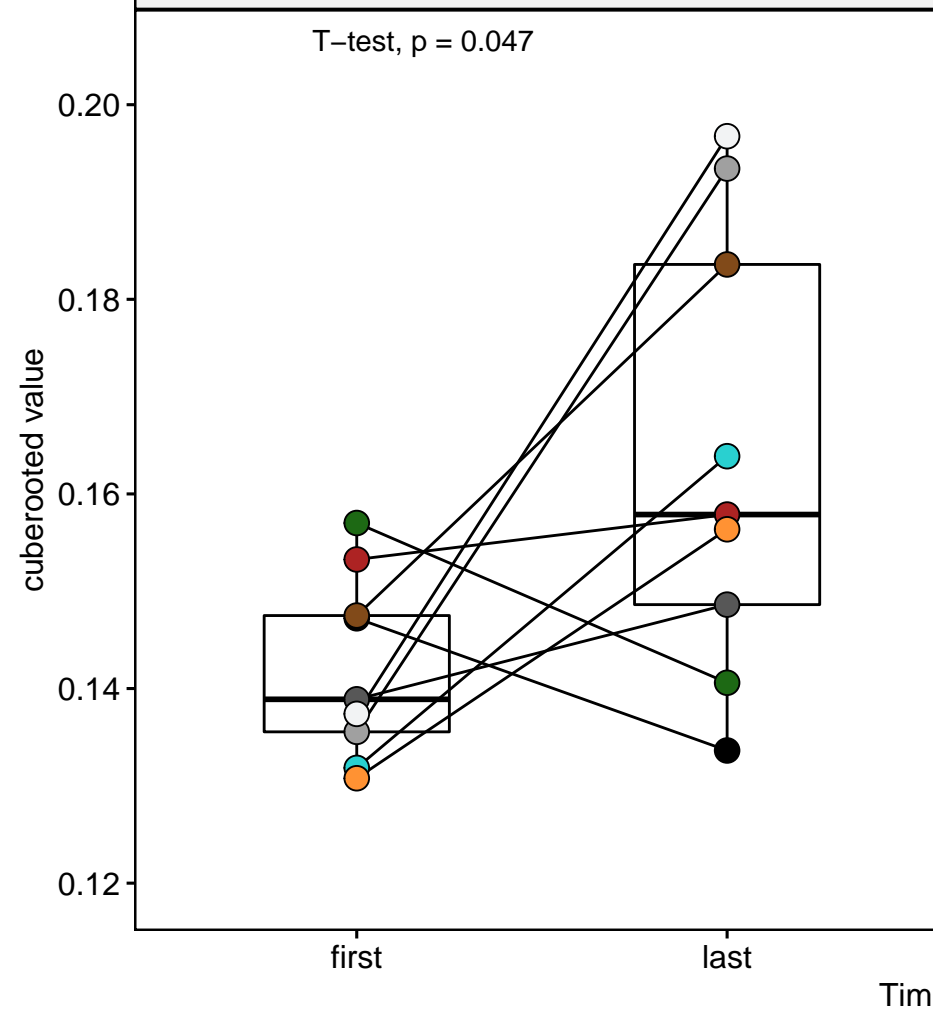

V

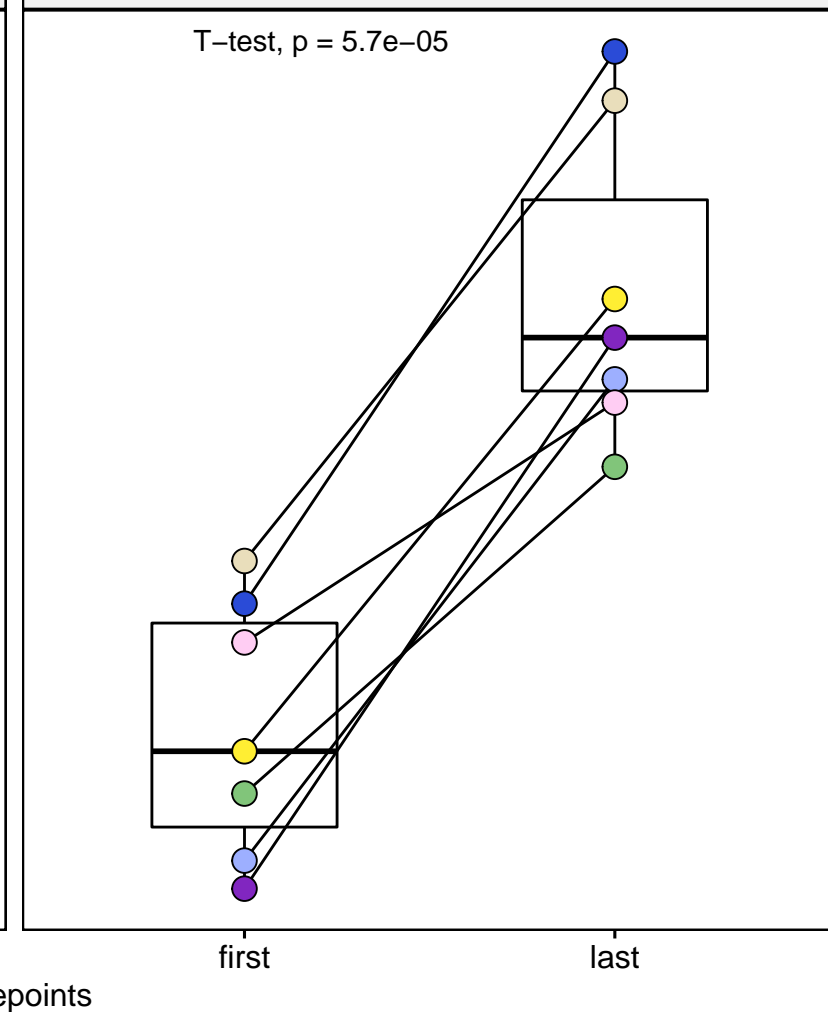

all patients (M+V)

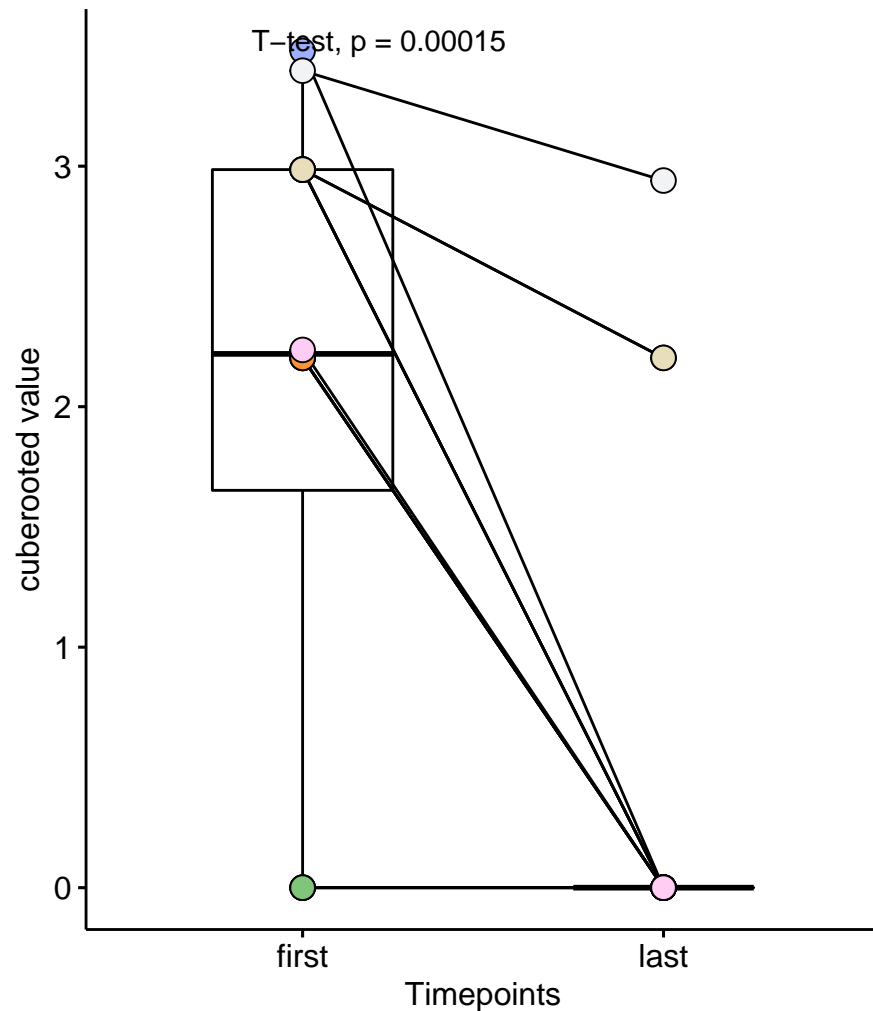

IL12p70

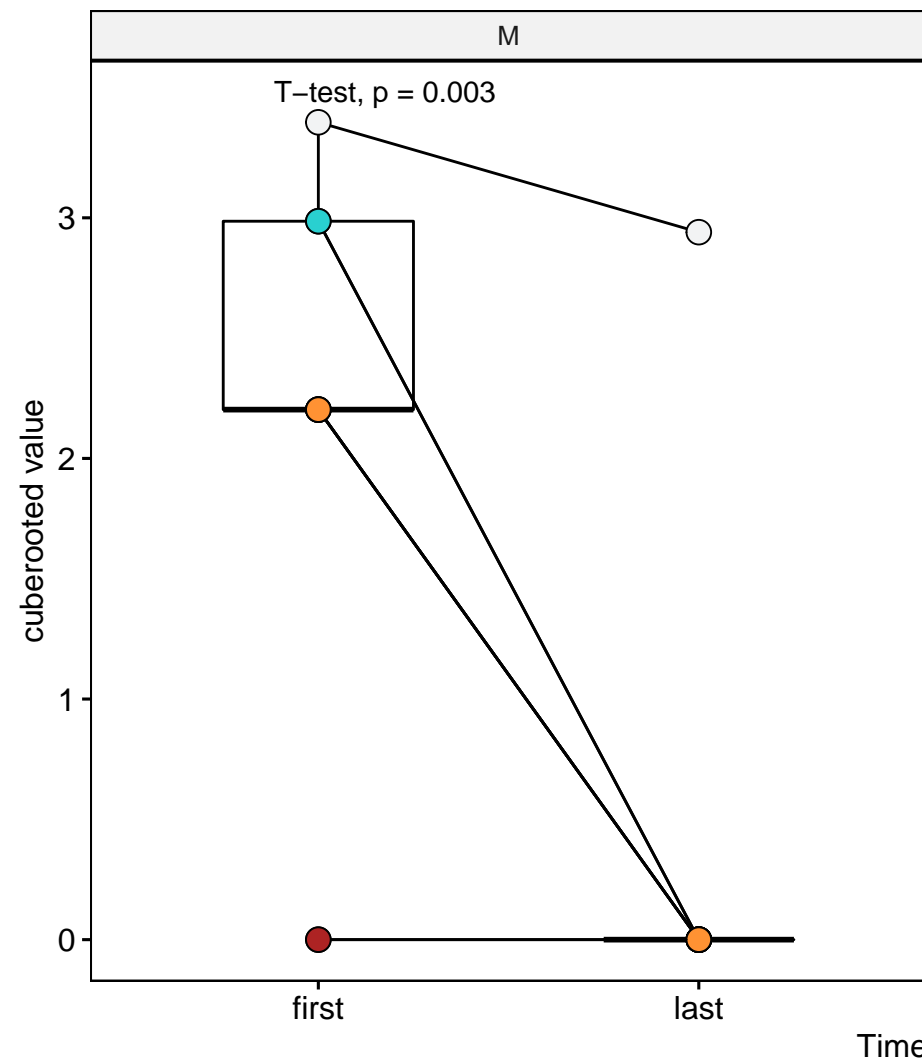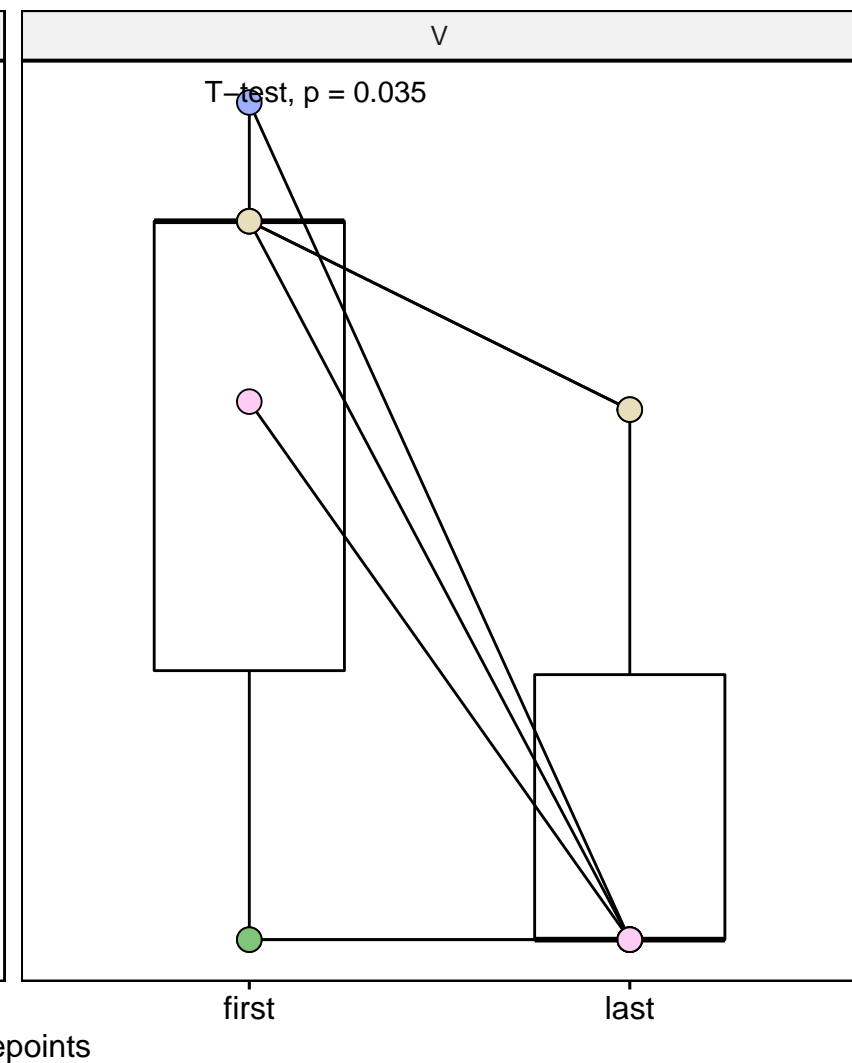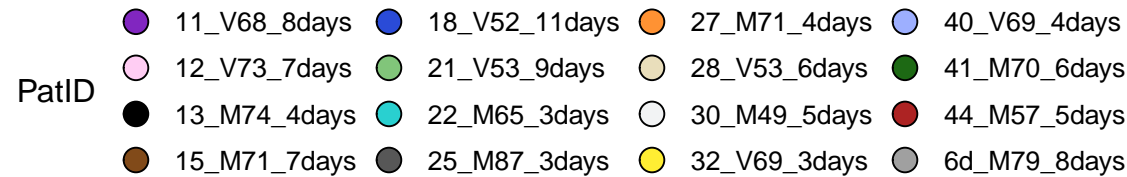

# IL10

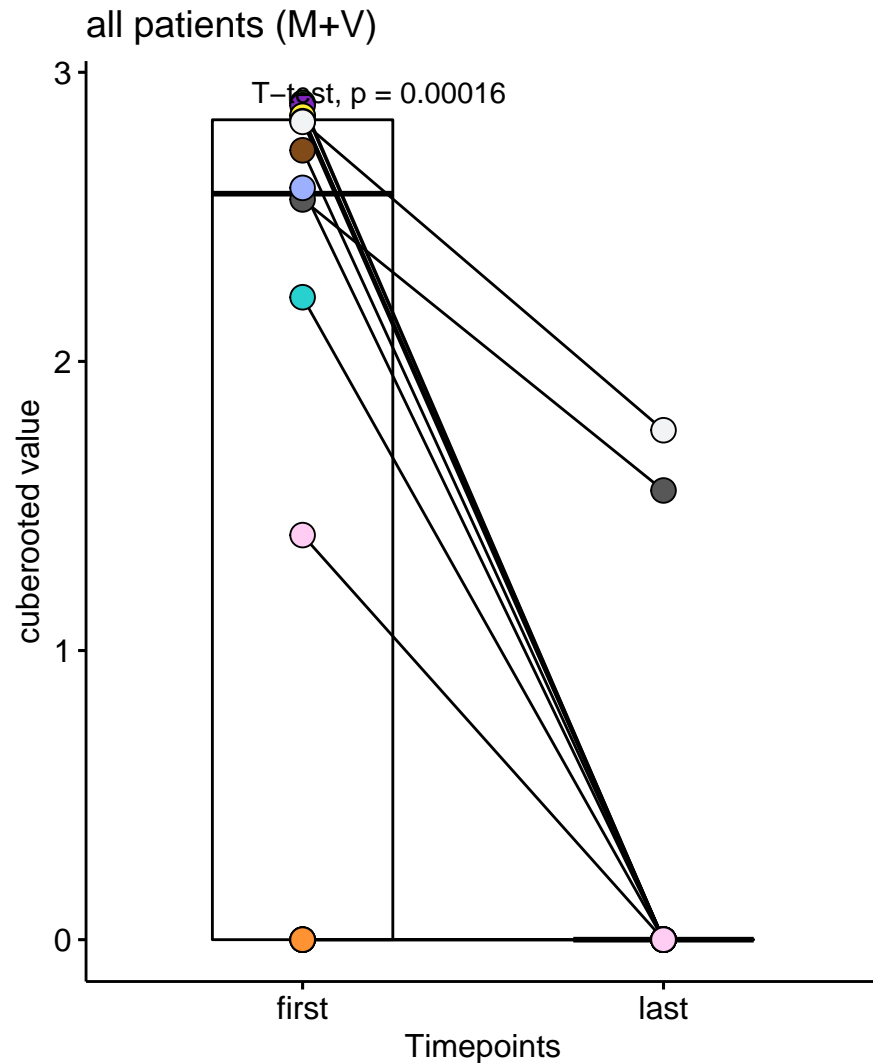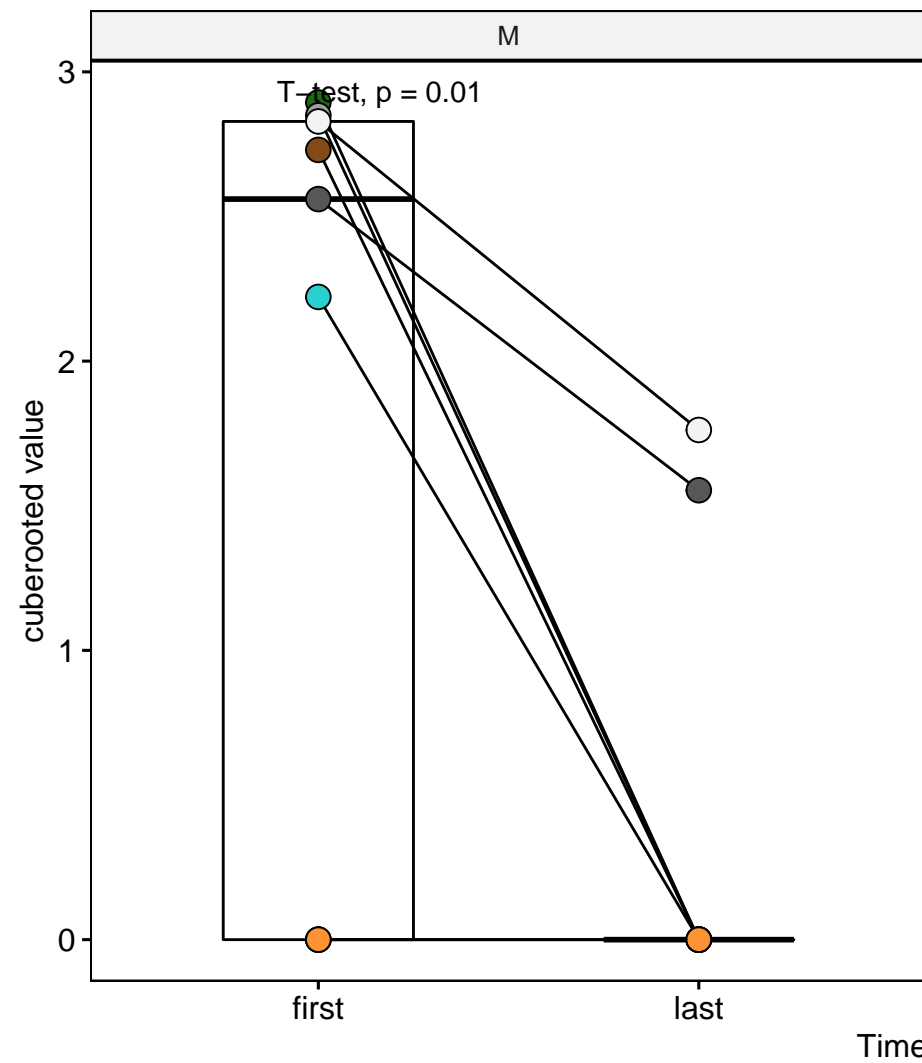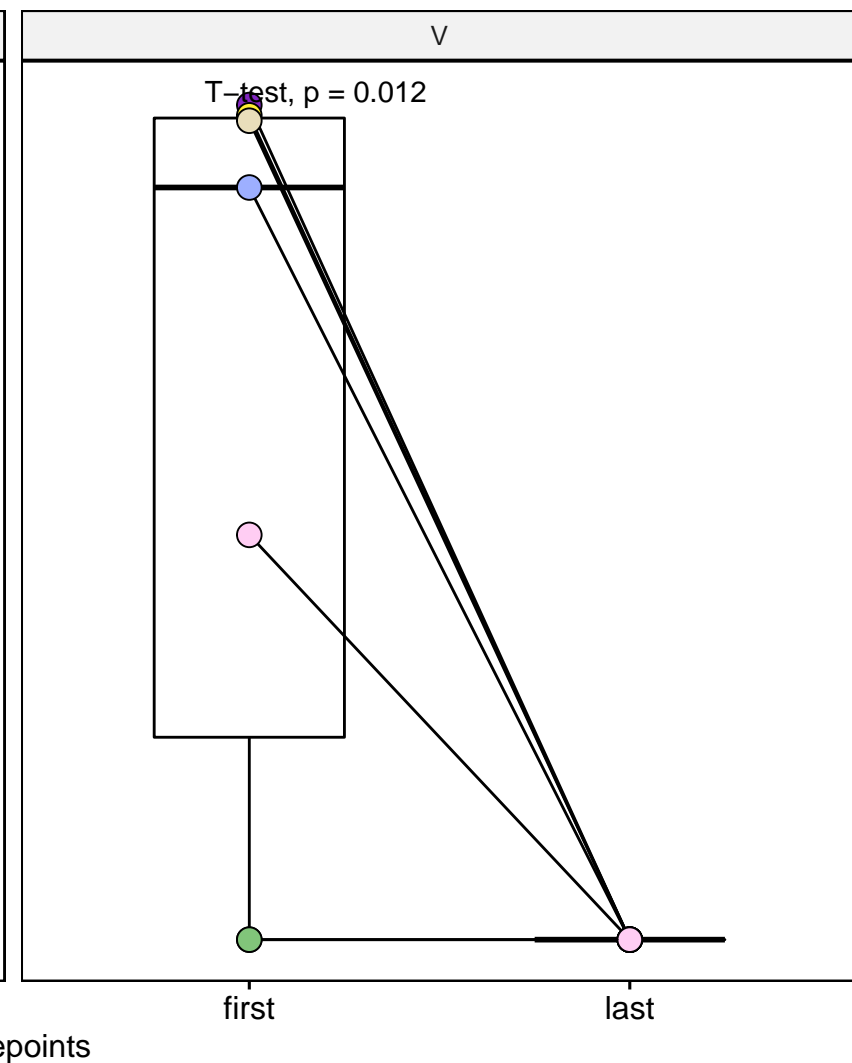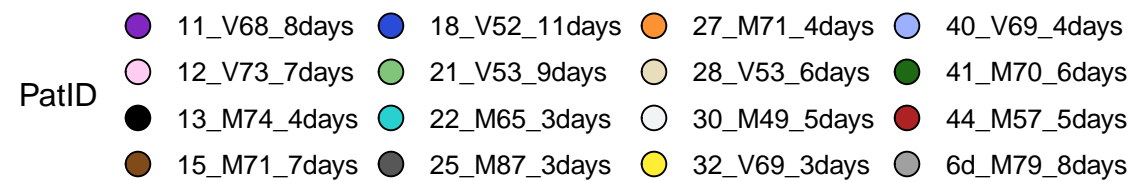



# Hydroxylysine\_amines

all patients (M+V)

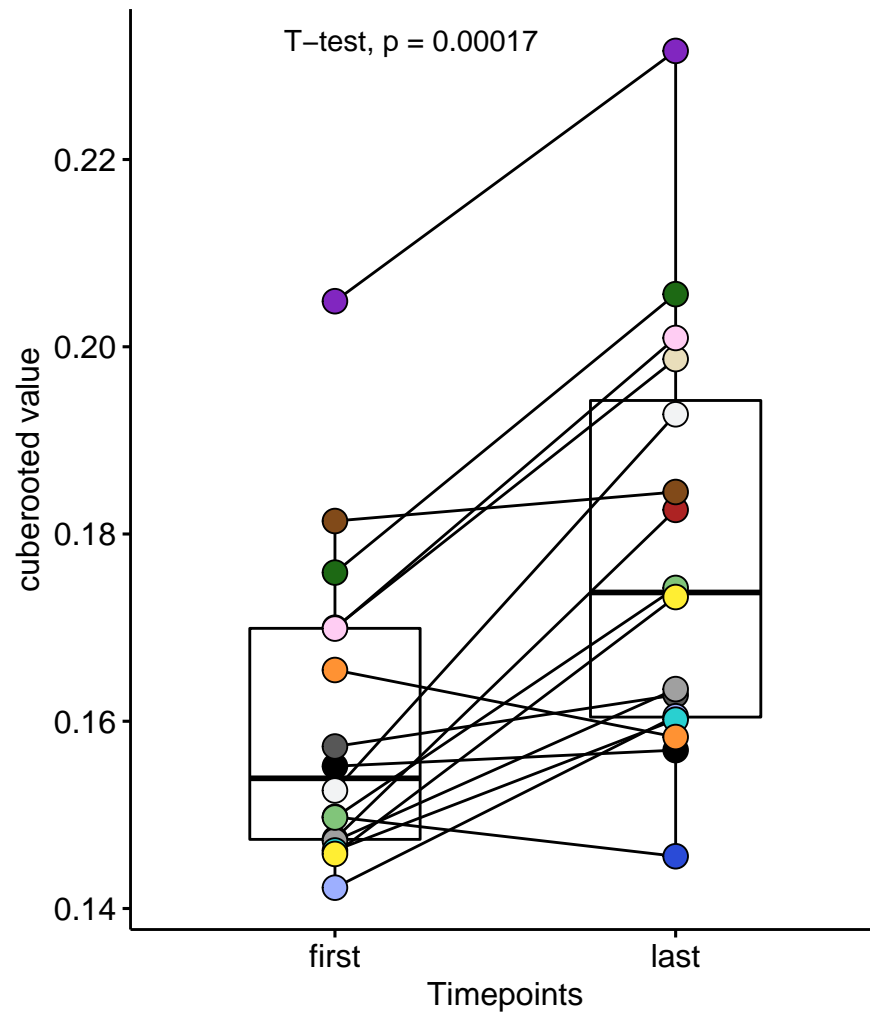

- PatID
- |              |               |              |              |
|--------------|---------------|--------------|--------------|
| 11_V68_8days | 18_V52_11days | 27_M71_4days | 40_V69_4days |
| 12_V73_7days | 21_V53_9days  | 28_V53_6days | 41_M70_6days |
| 13_M74_4days | 22_M65_3days  | 30_M49_5days | 44_M57_5days |
| 15_M71_7days | 25_M87_3days  | 32_V69_3days | 6d_M79_8days |

M

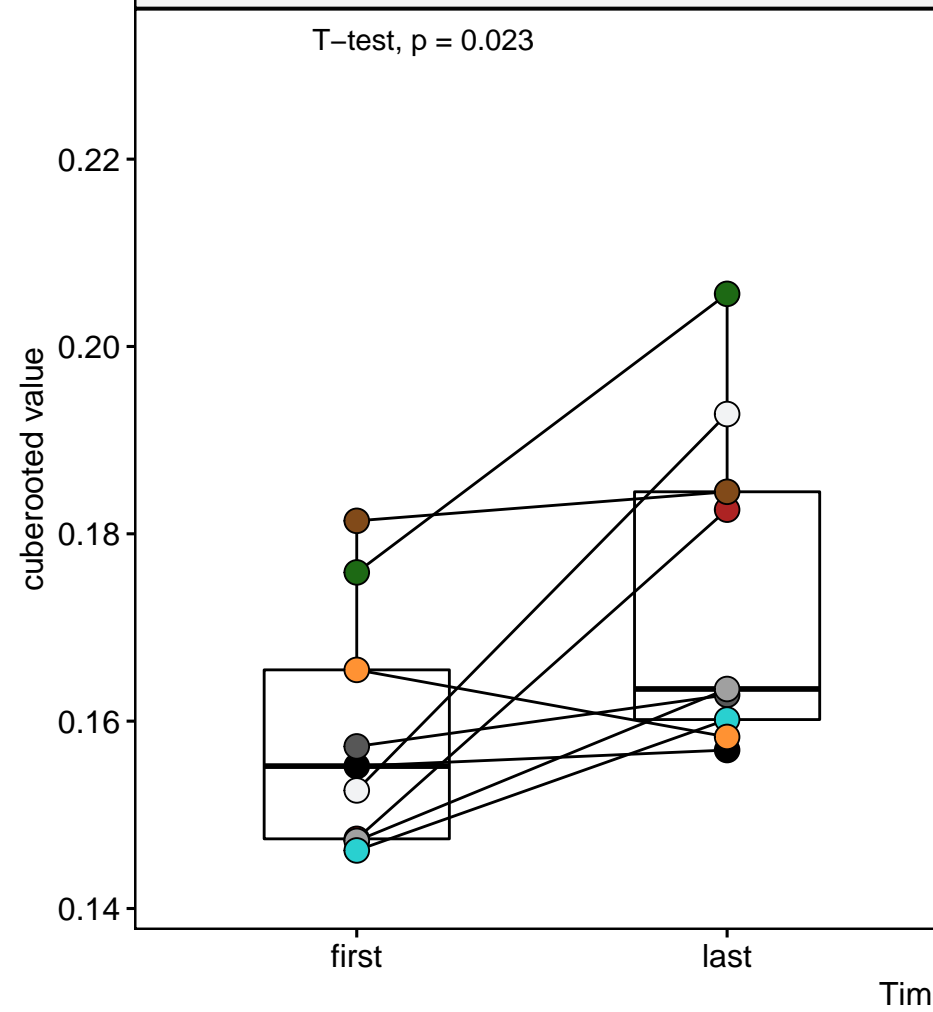

V

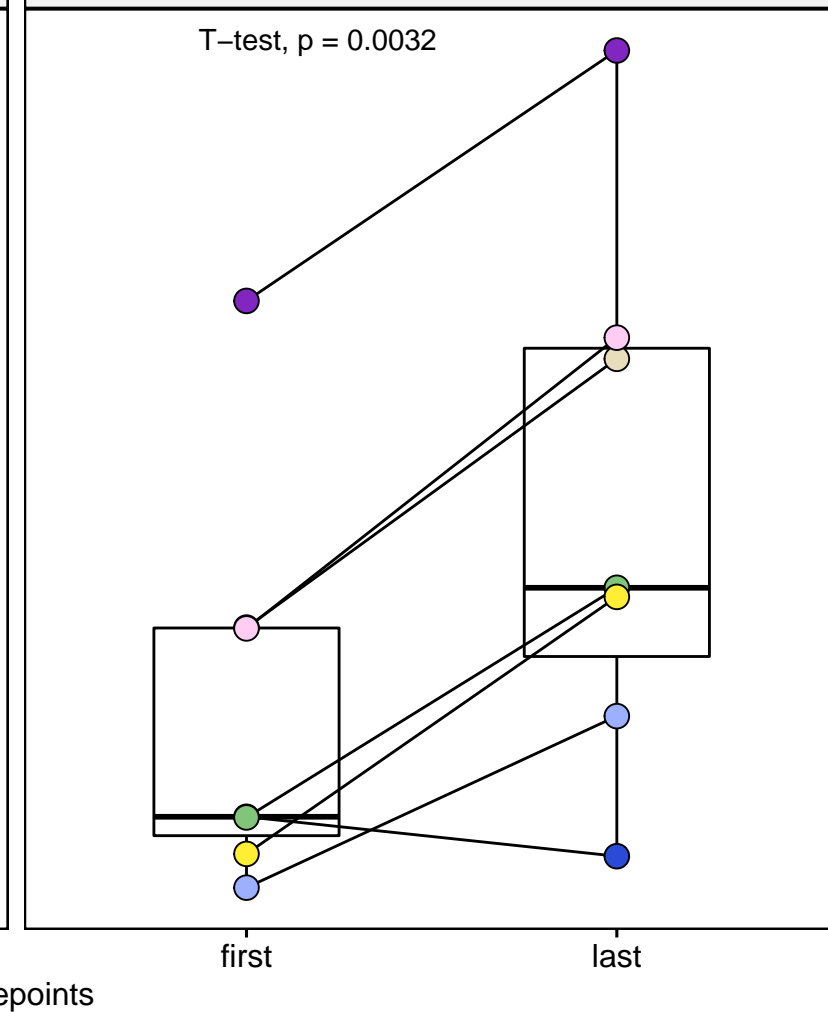

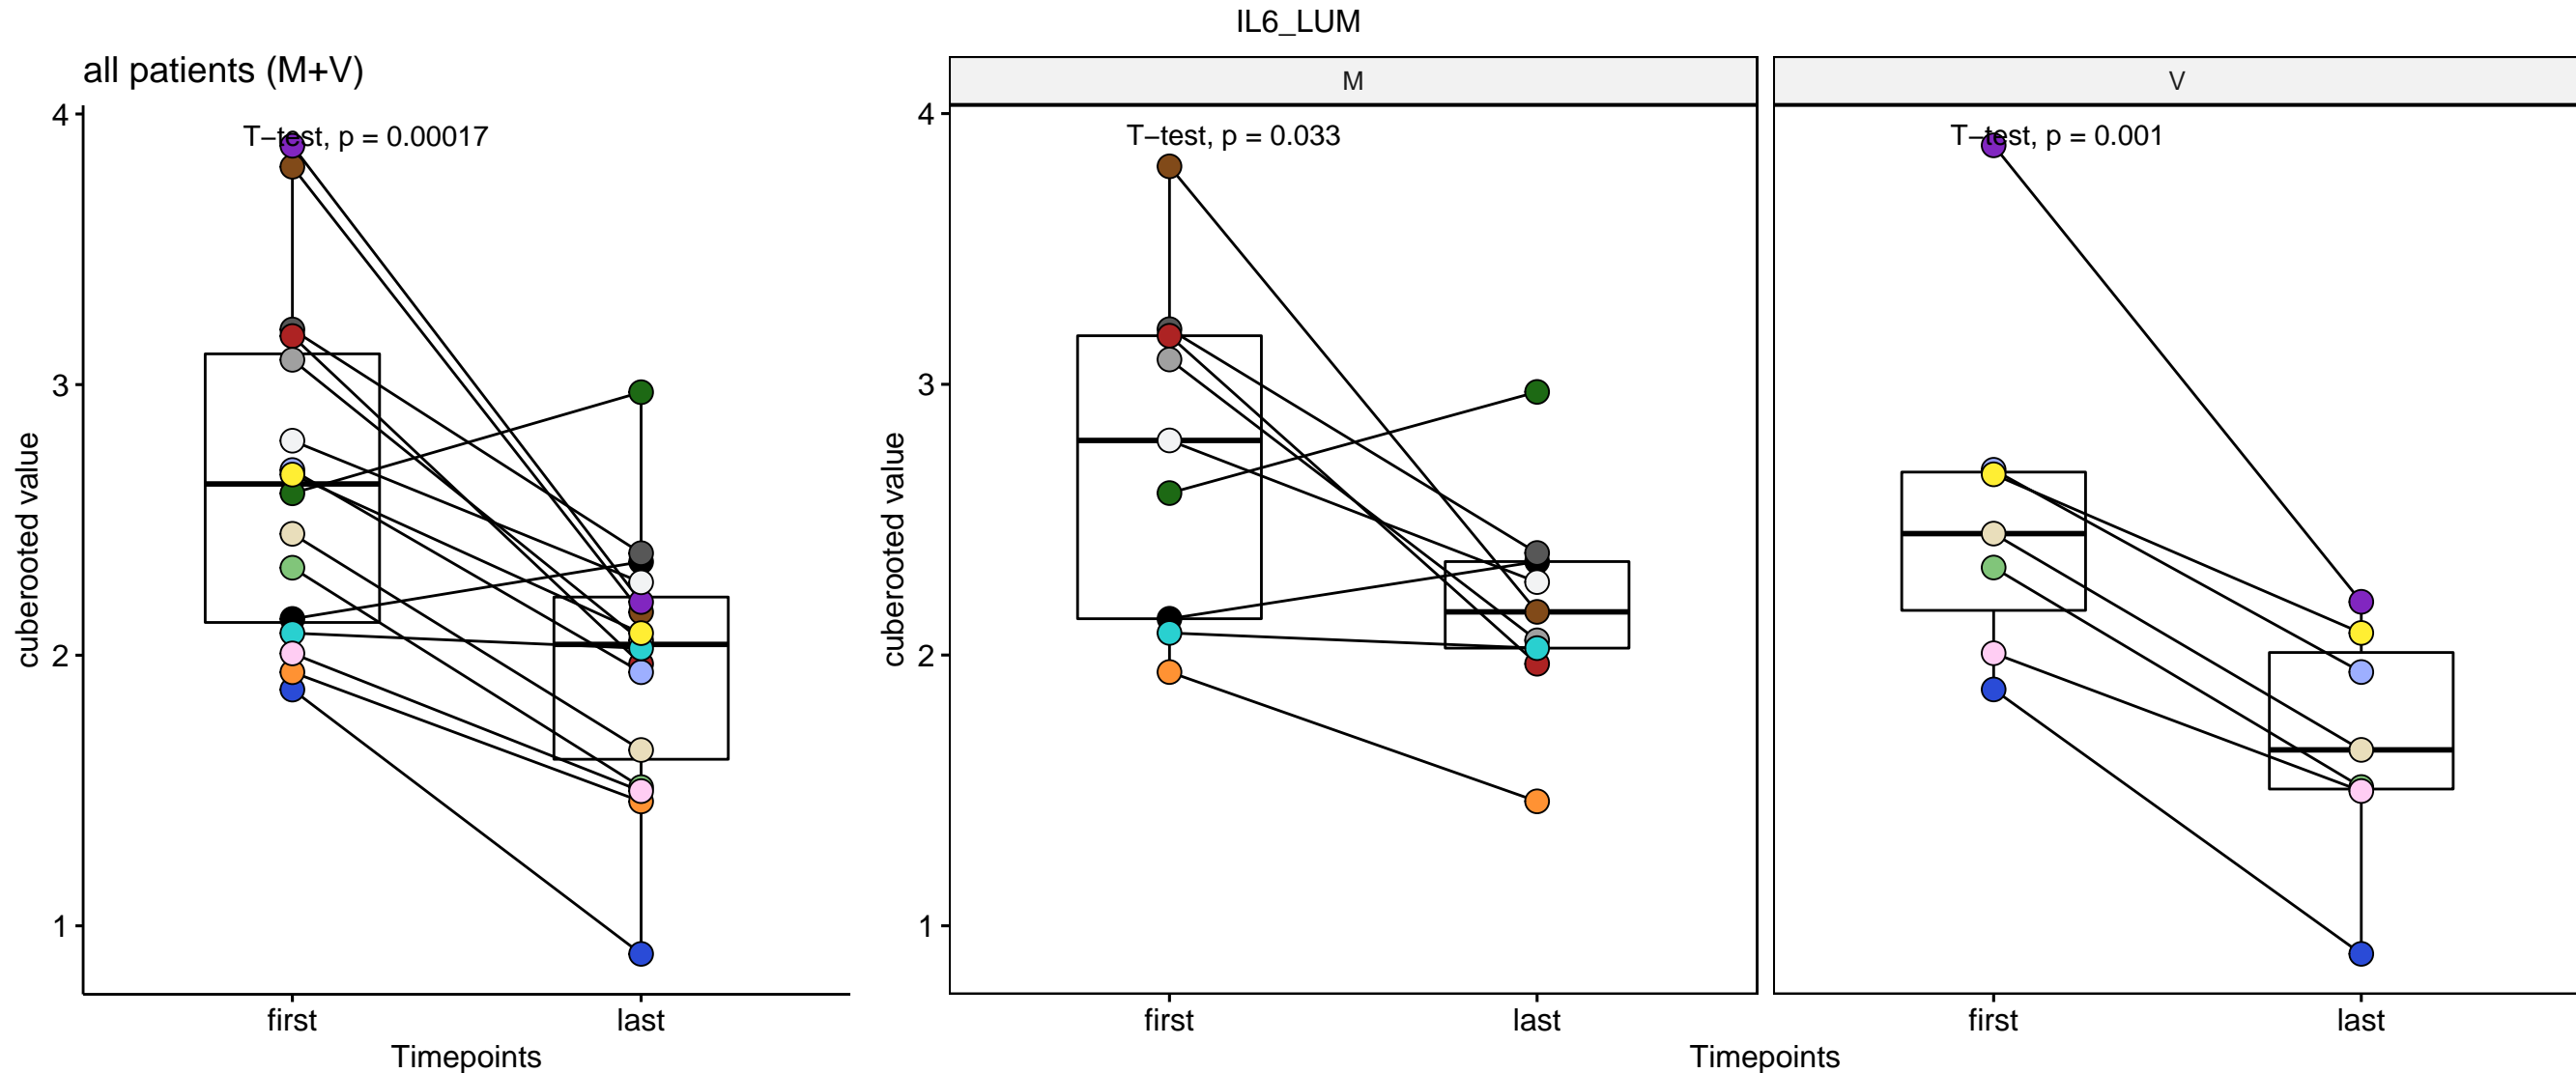

PatID

|              |               |              |              |
|--------------|---------------|--------------|--------------|
| 11_V68_8days | 18_V52_11days | 27_M71_4days | 40_V69_4days |
| 12_V73_7days | 21_V53_9days  | 28_V53_6days | 41_M70_6days |
| 13_M74_4days | 22_M65_3days  | 30_M49_5days | 44_M57_5days |
| 15_M71_7days | 25_M87_3days  | 32_V69_3days | 6d_M79_8days |

## ADMA\_amines\_wc

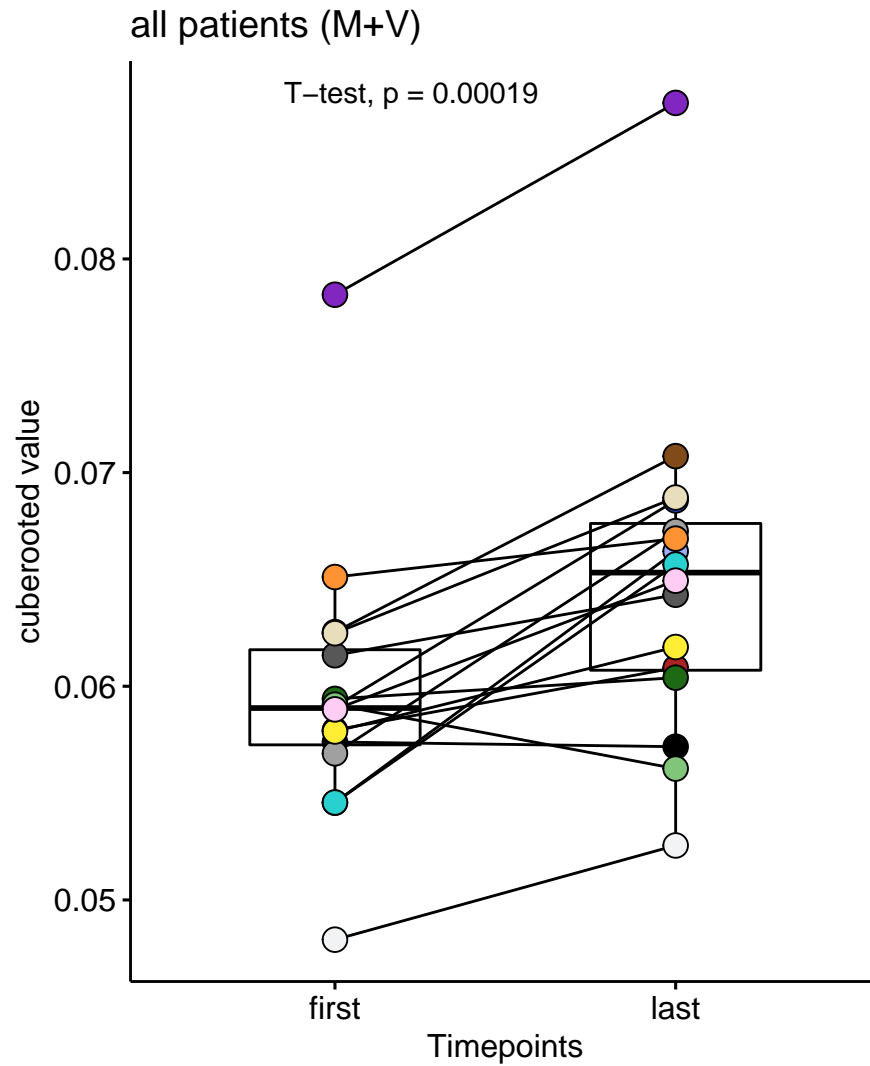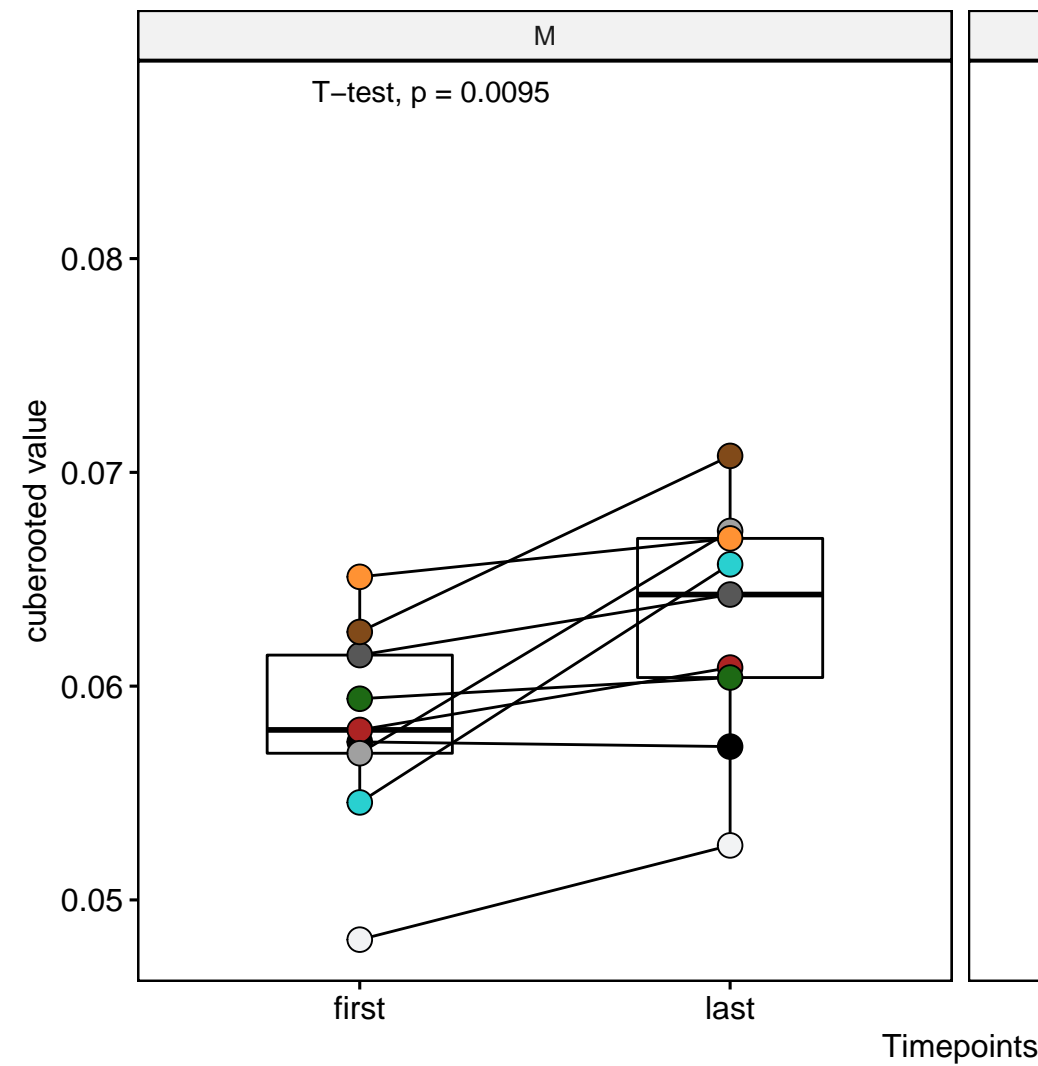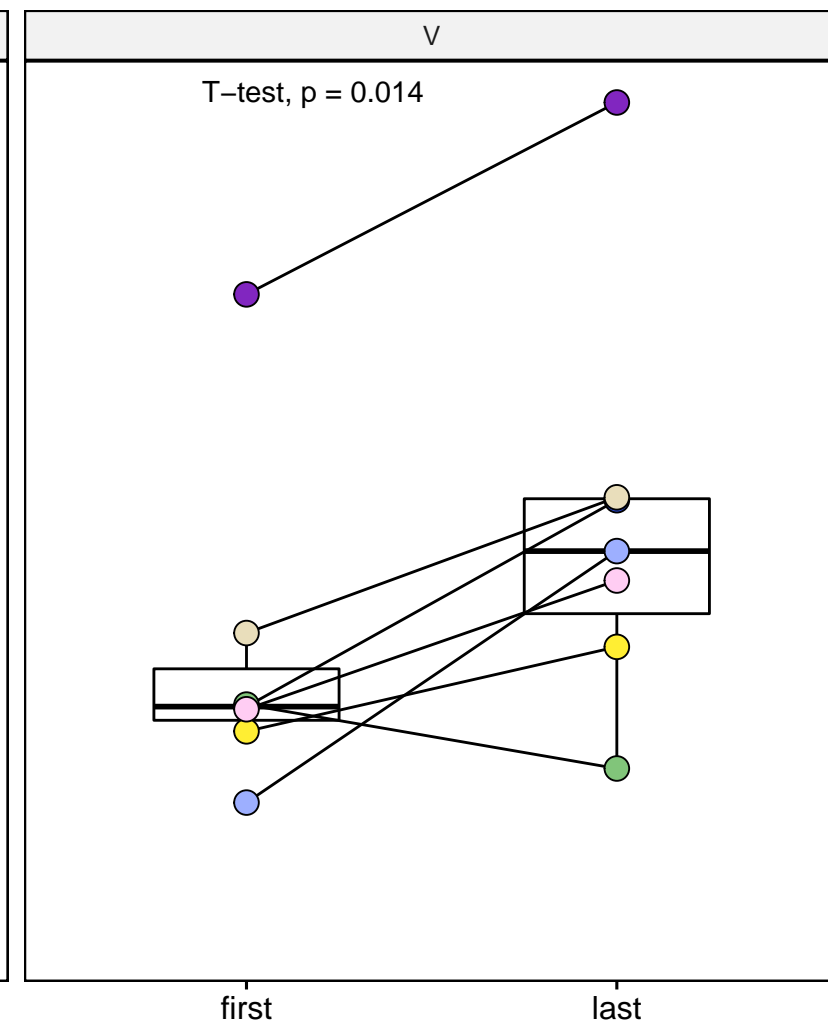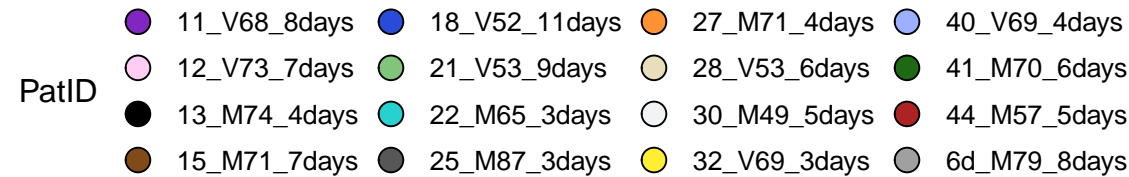

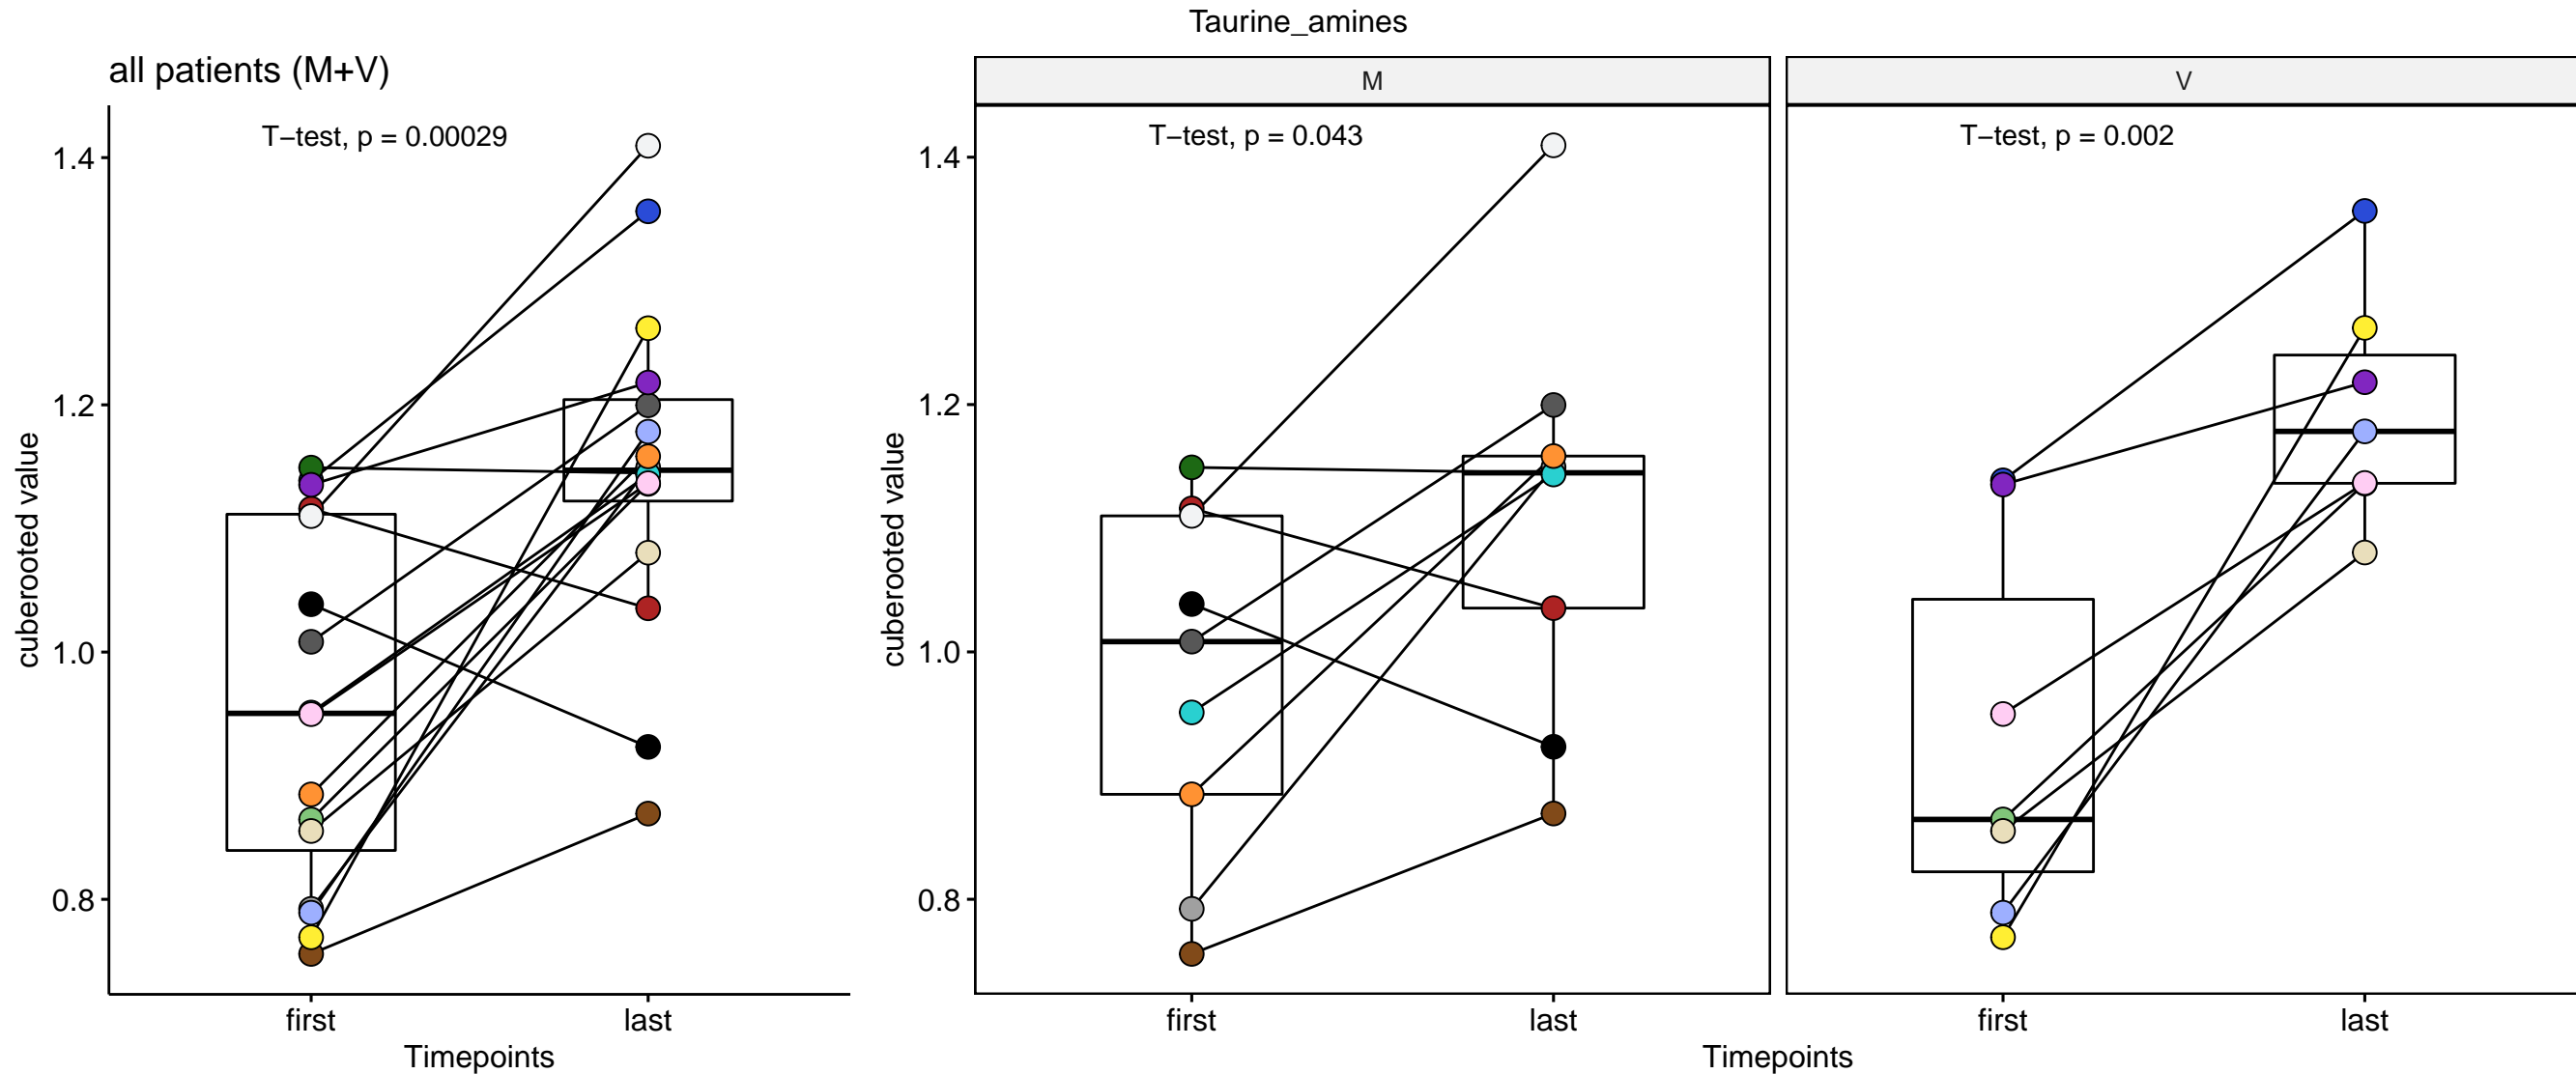

PatID

|              |               |              |              |
|--------------|---------------|--------------|--------------|
| 11_V68_8days | 18_V52_11days | 27_M71_4days | 40_V69_4days |
| 12_V73_7days | 21_V53_9days  | 28_V53_6days | 41_M70_6days |
| 13_M74_4days | 22_M65_3days  | 30_M49_5days | 44_M57_5days |
| 15_M71_7days | 25_M87_3days  | 32_V69_3days | 6d_M79_8days |

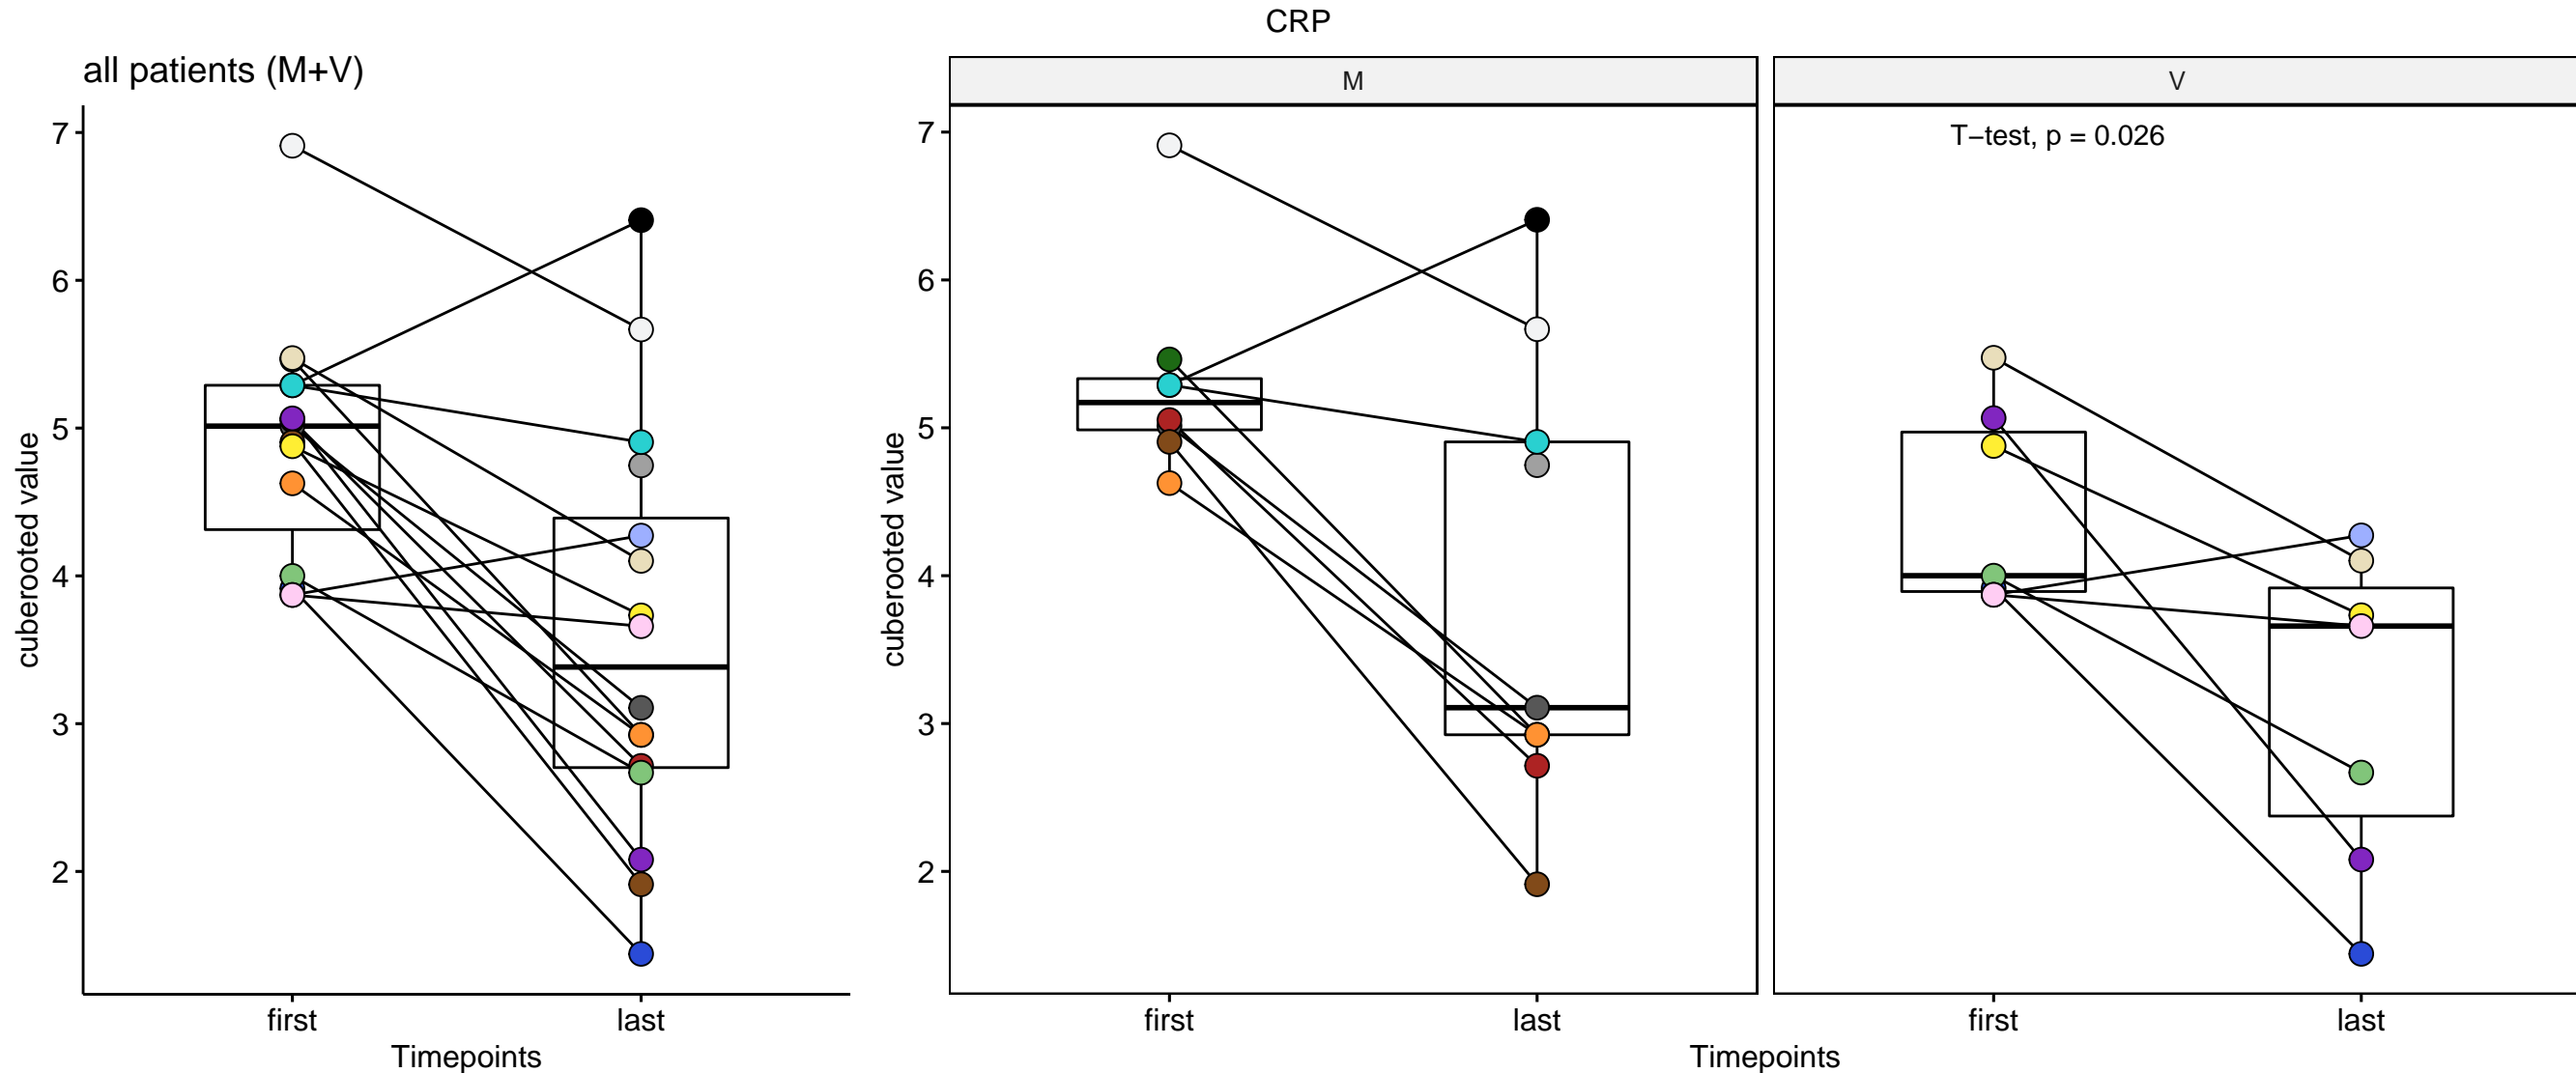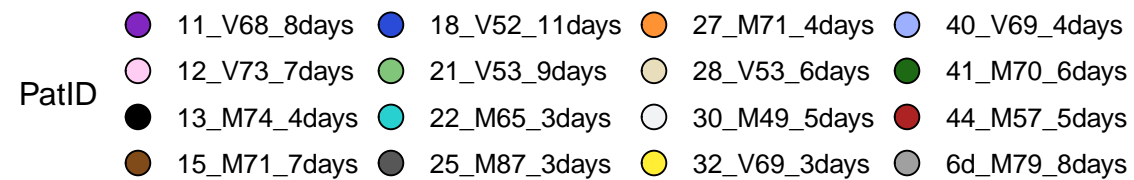

# L.Threonine\_amines

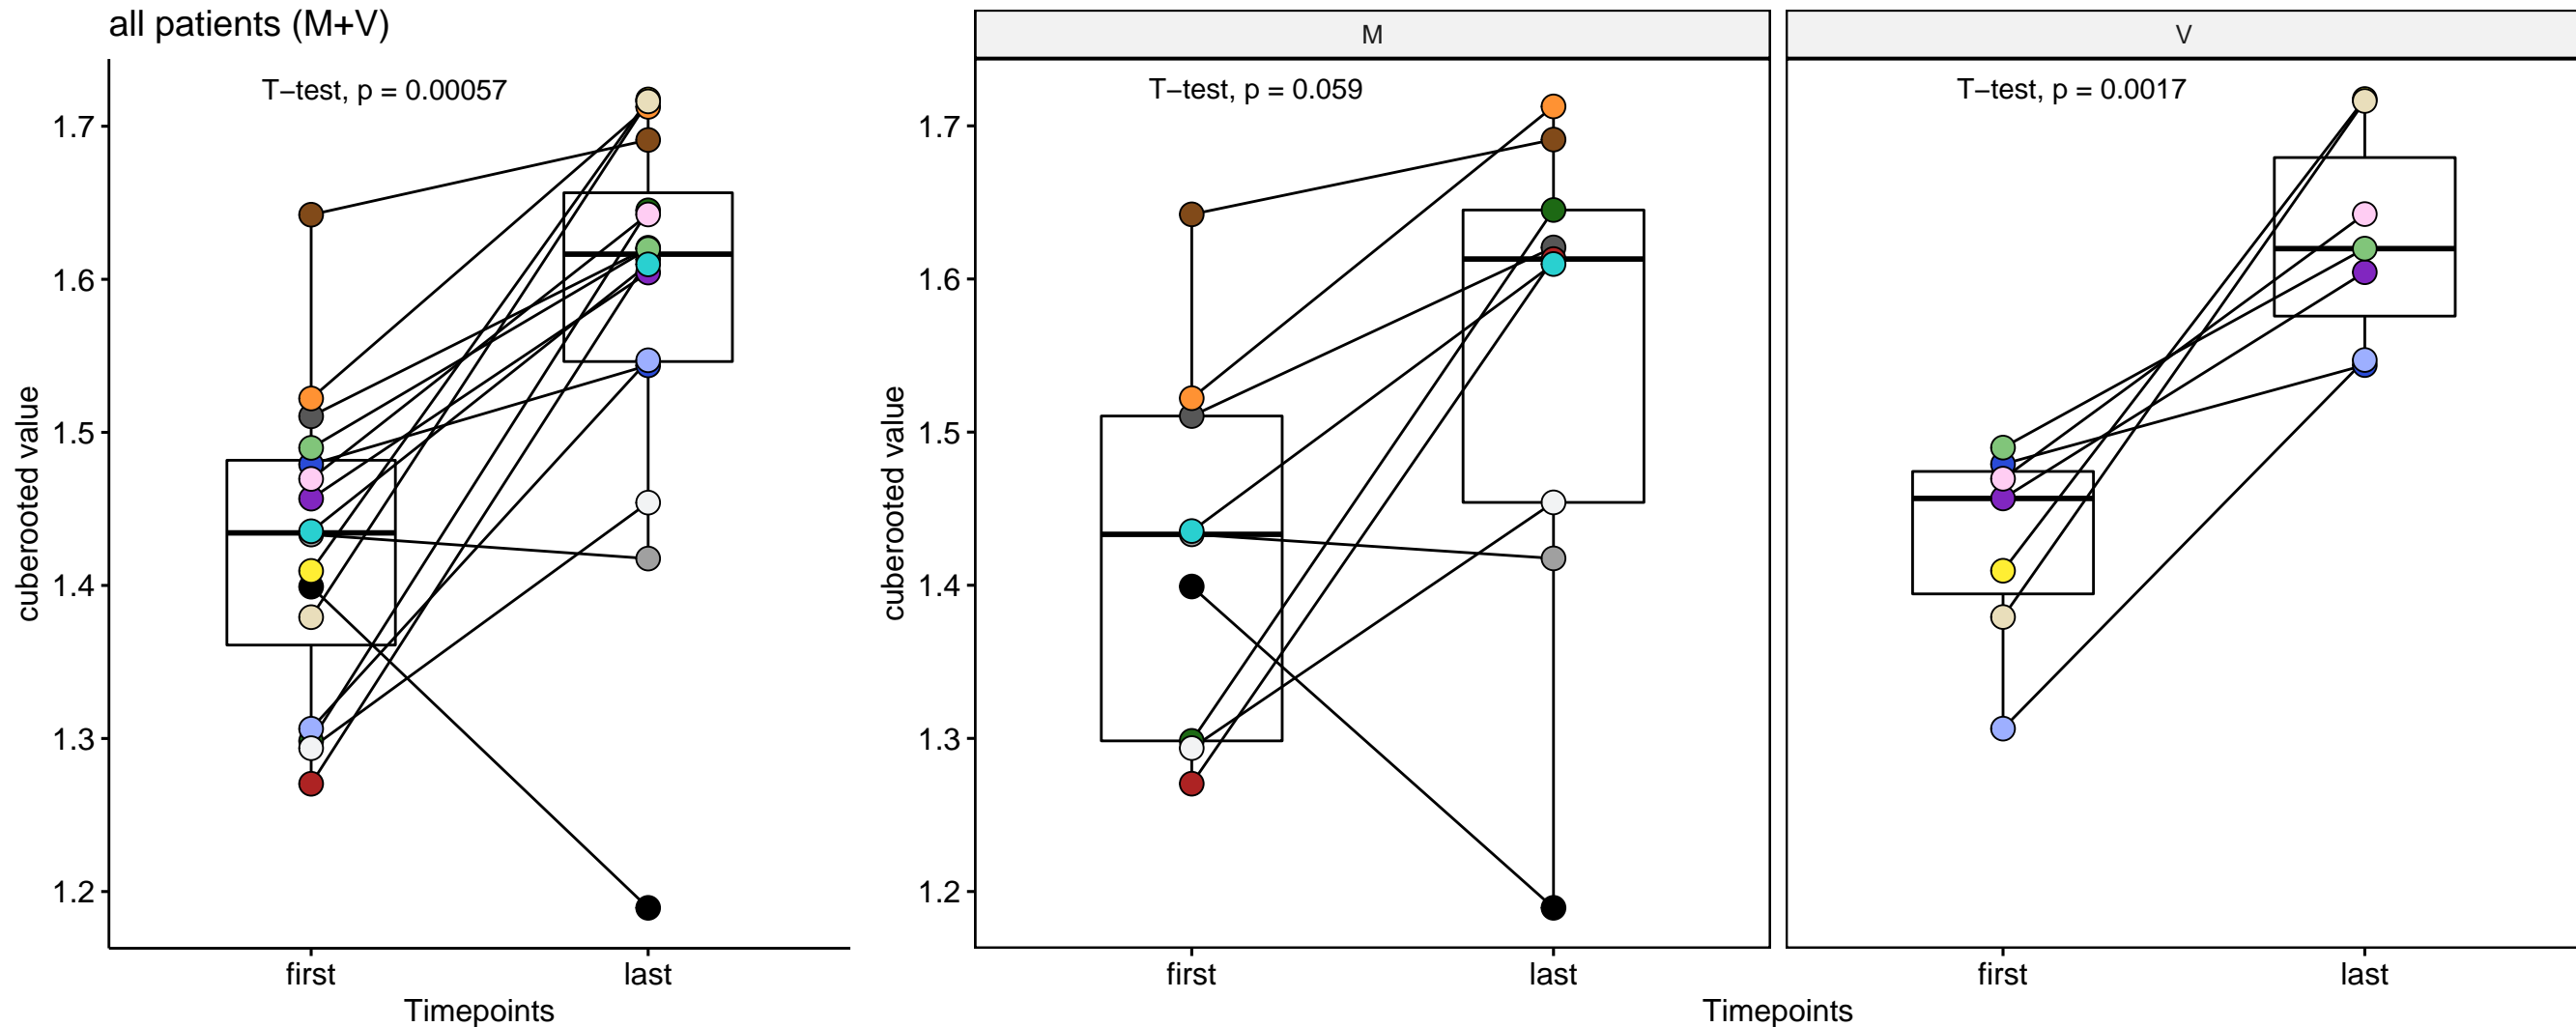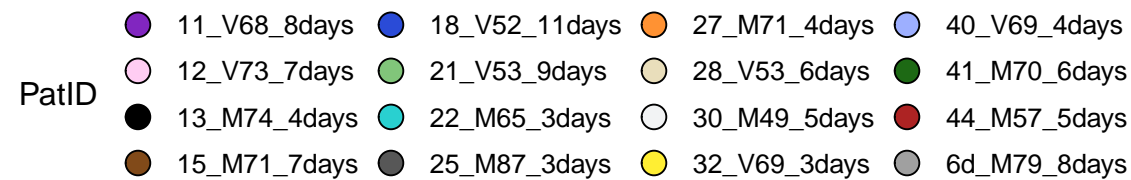

# L.Carnosine\_amines

all patients (M+V)

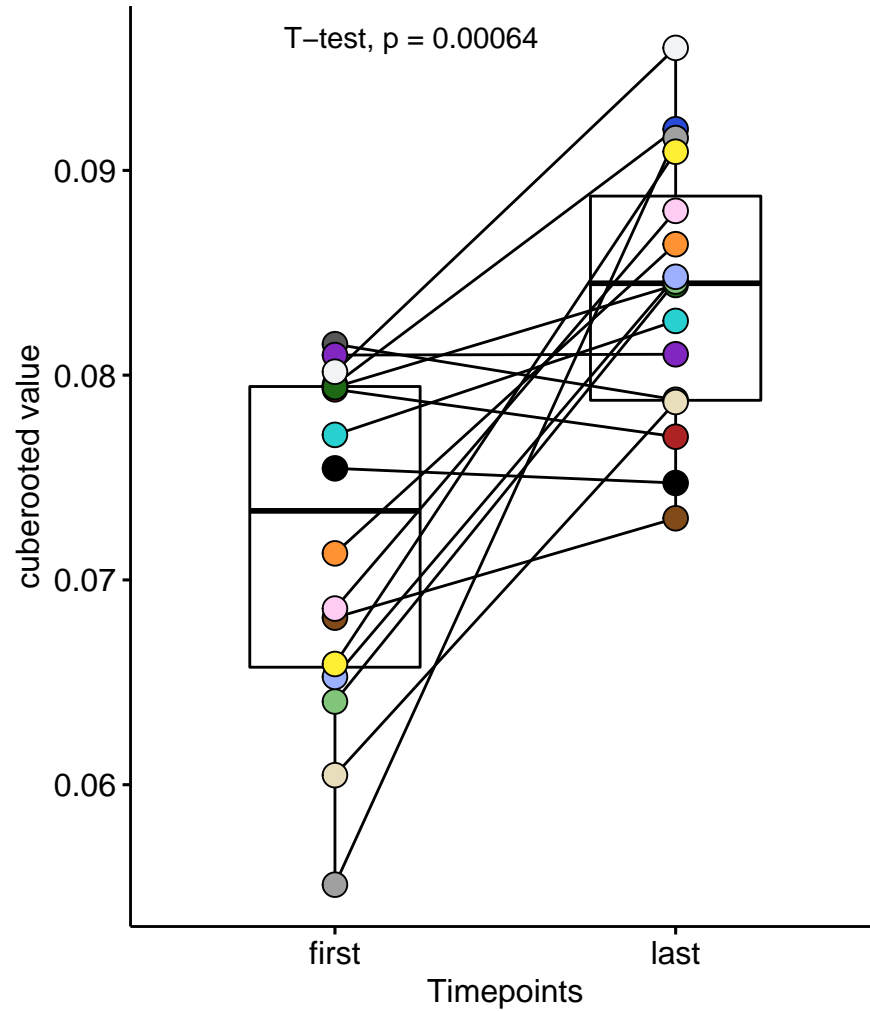

PatID

|              |               |              |              |
|--------------|---------------|--------------|--------------|
| 11_V68_8days | 18_V52_11days | 27_M71_4days | 40_V69_4days |
| 12_V73_7days | 21_V53_9days  | 28_V53_6days | 41_M70_6days |
| 13_M74_4days | 22_M65_3days  | 30_M49_5days | 44_M57_5days |
| 15_M71_7days | 25_M87_3days  | 32_V69_3days | 6d_M79_8days |

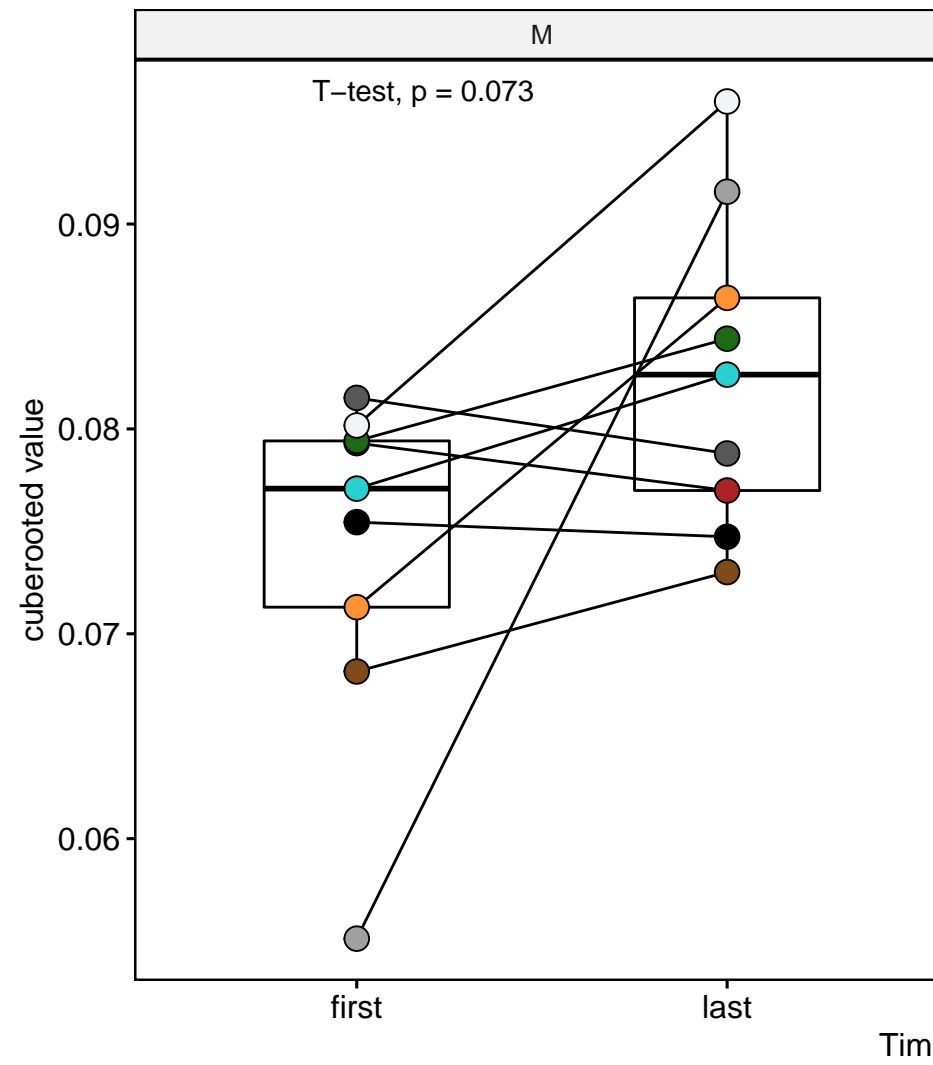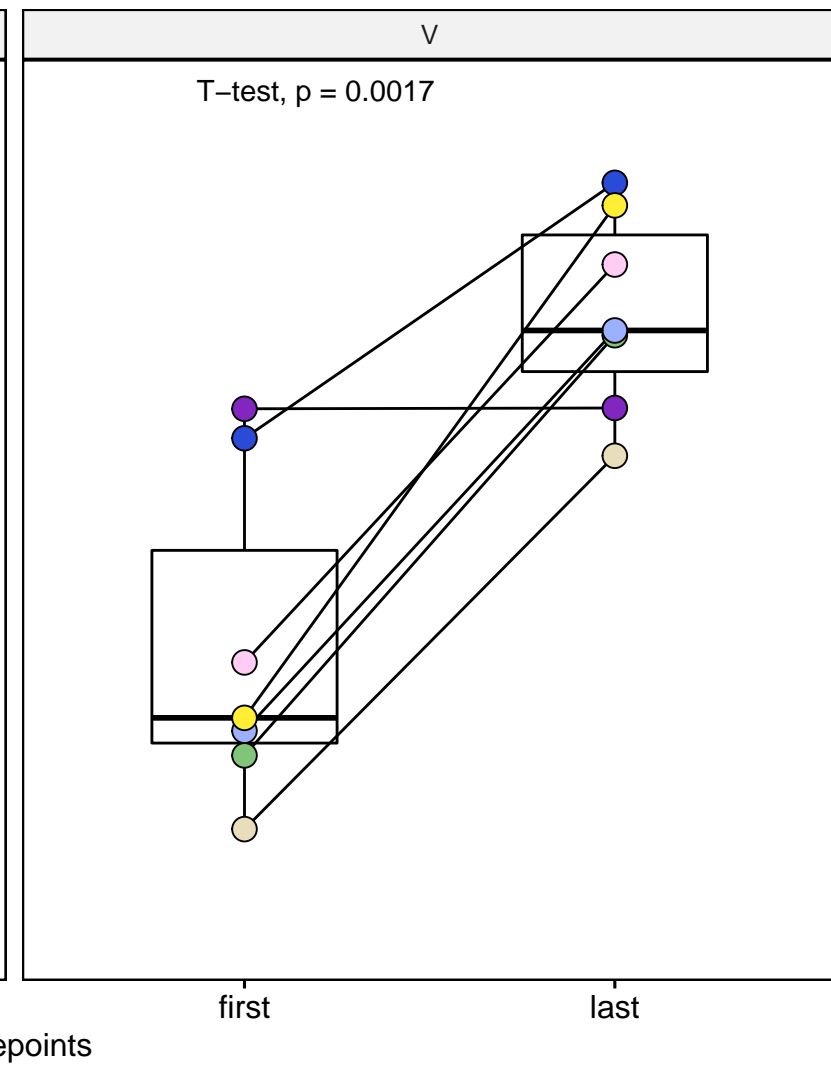

# L-Phenylalanine\_amines

all patients (M+V)

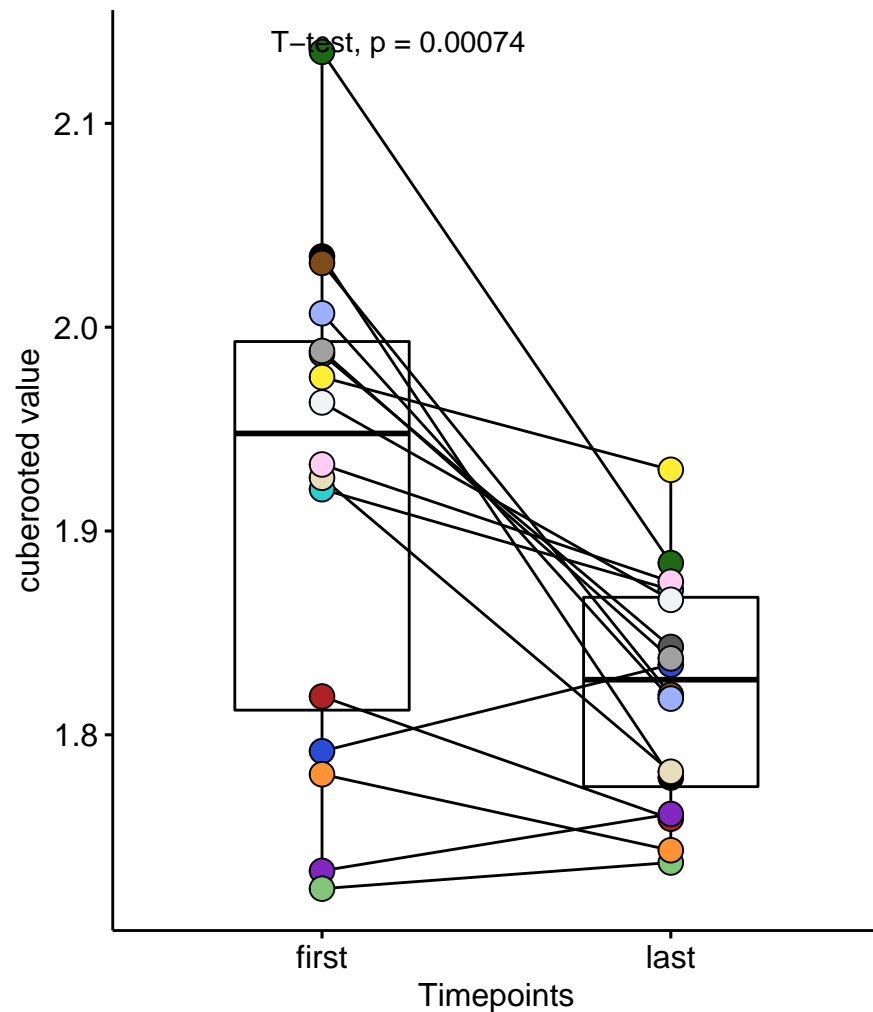

- PatID
- |              |               |              |              |
|--------------|---------------|--------------|--------------|
| 11_V68_8days | 18_V52_11days | 27_M71_4days | 40_V69_4days |
| 12_V73_7days | 21_V53_9days  | 28_V53_6days | 41_M70_6days |
| 13_M74_4days | 22_M65_3days  | 30_M49_5days | 44_M57_5days |
| 15_M71_7days | 25_M87_3days  | 32_V69_3days | 6d_M79_8days |

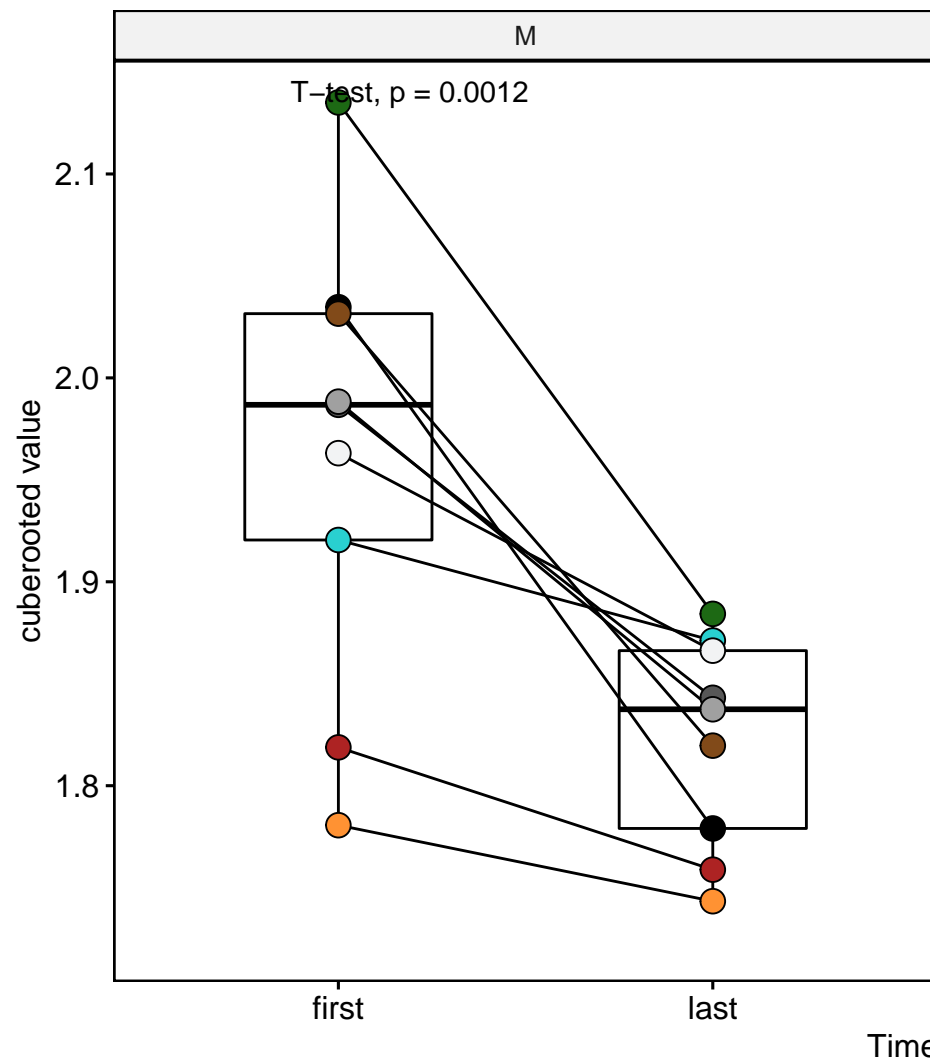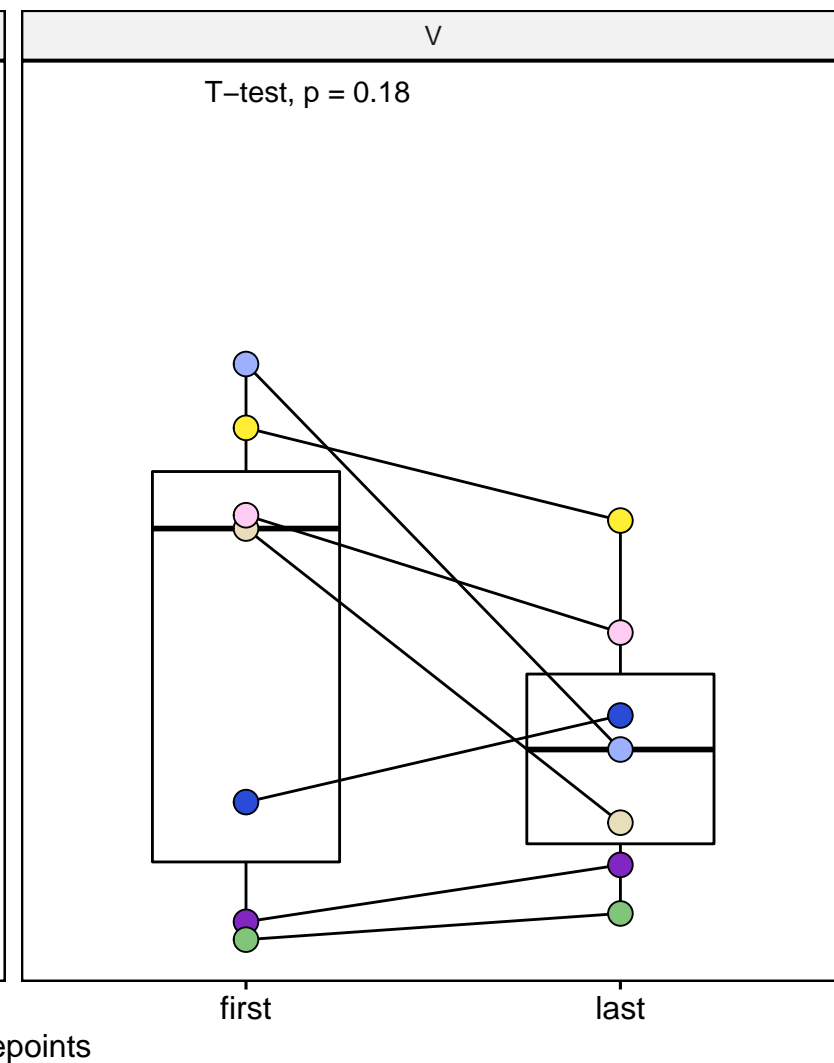



all patients (M+V)

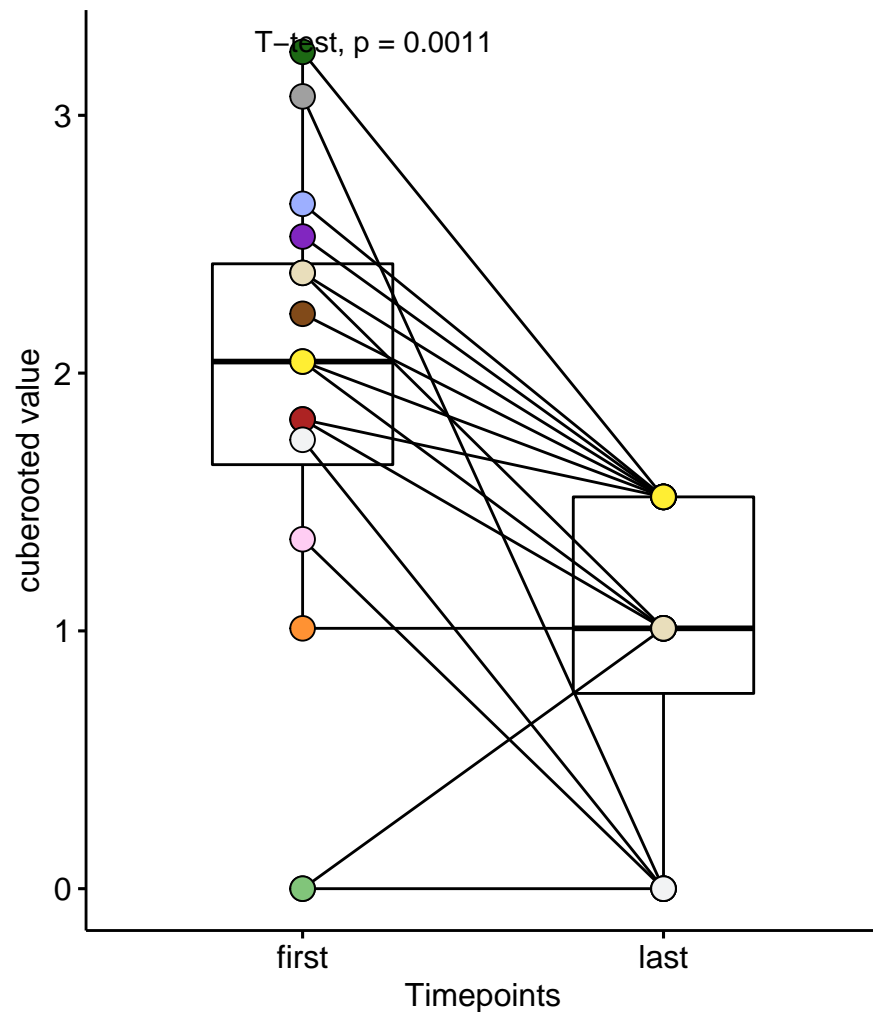

IFNG

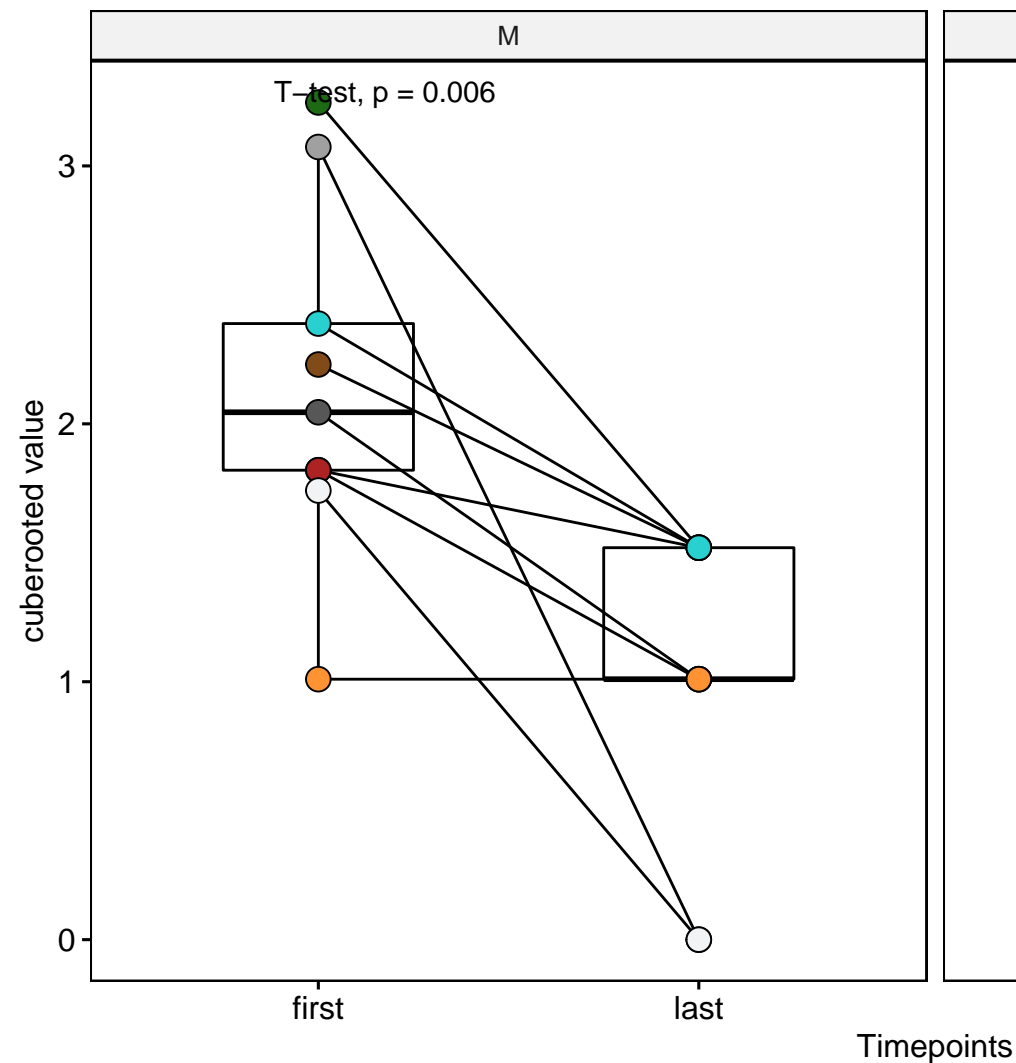

V

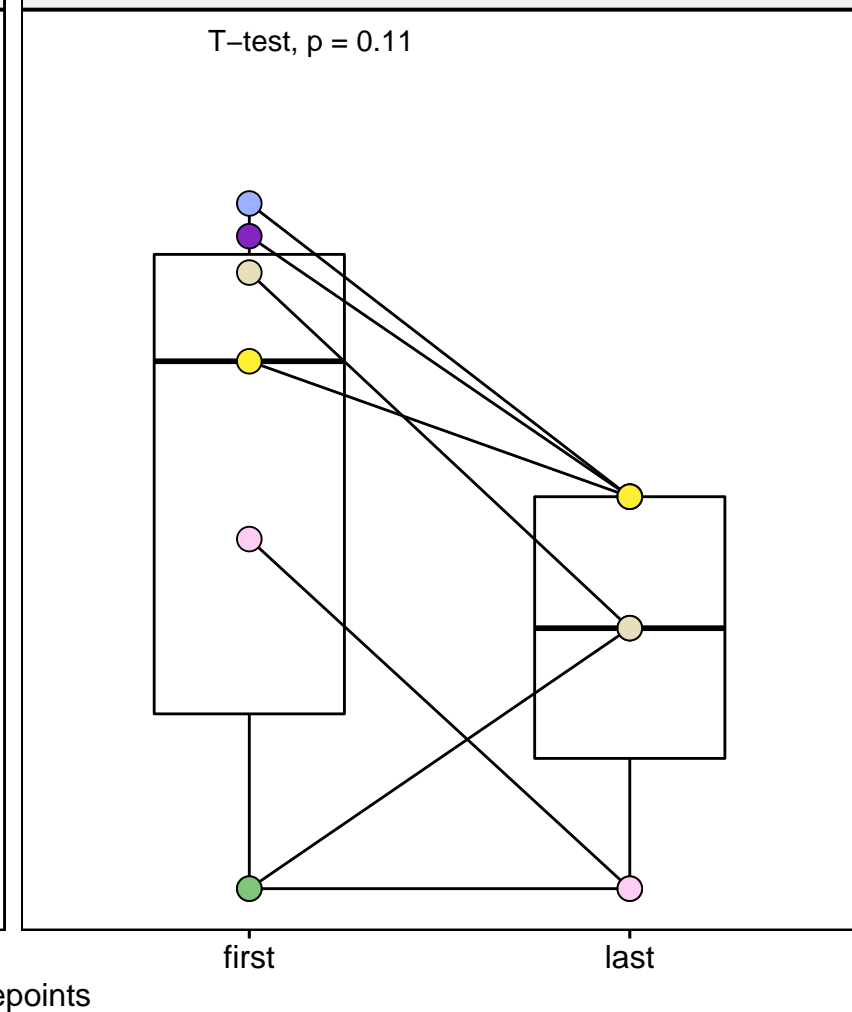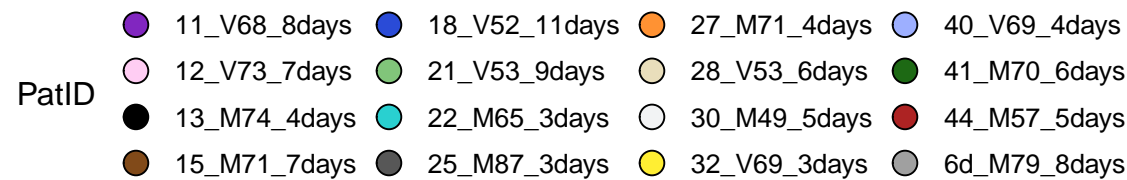

# S.Methylcysteine\_amines

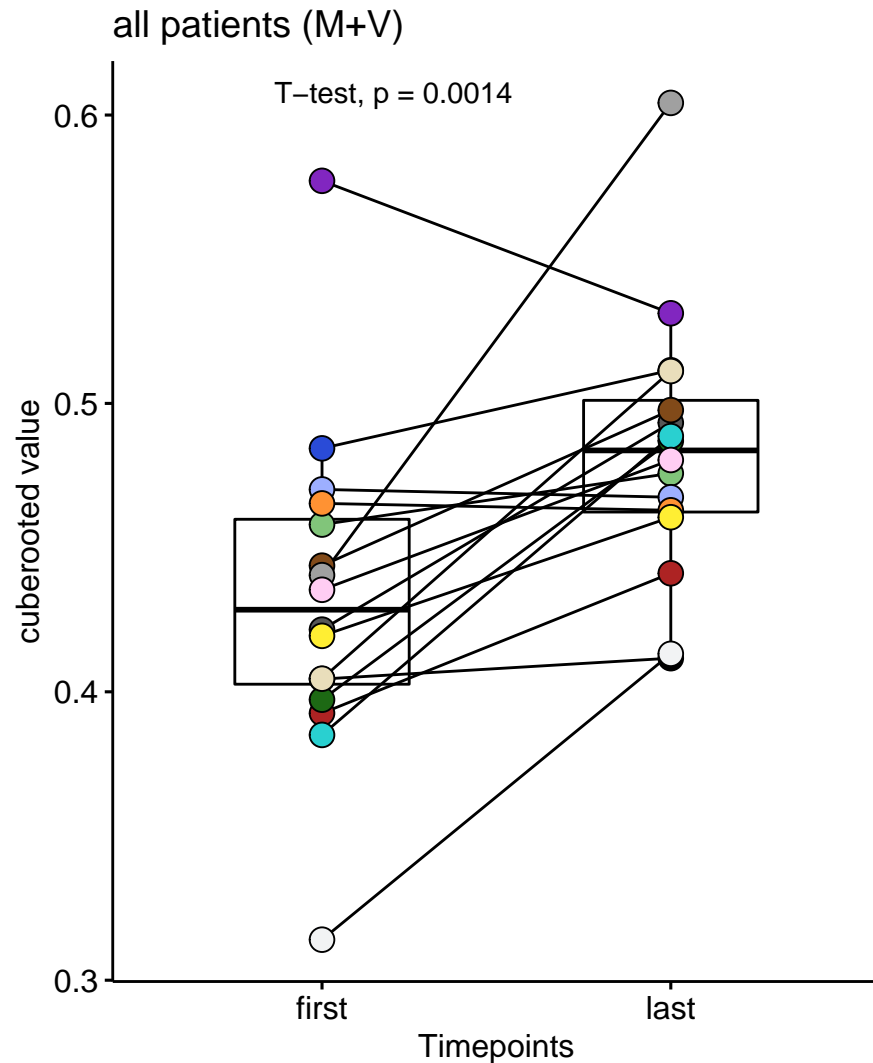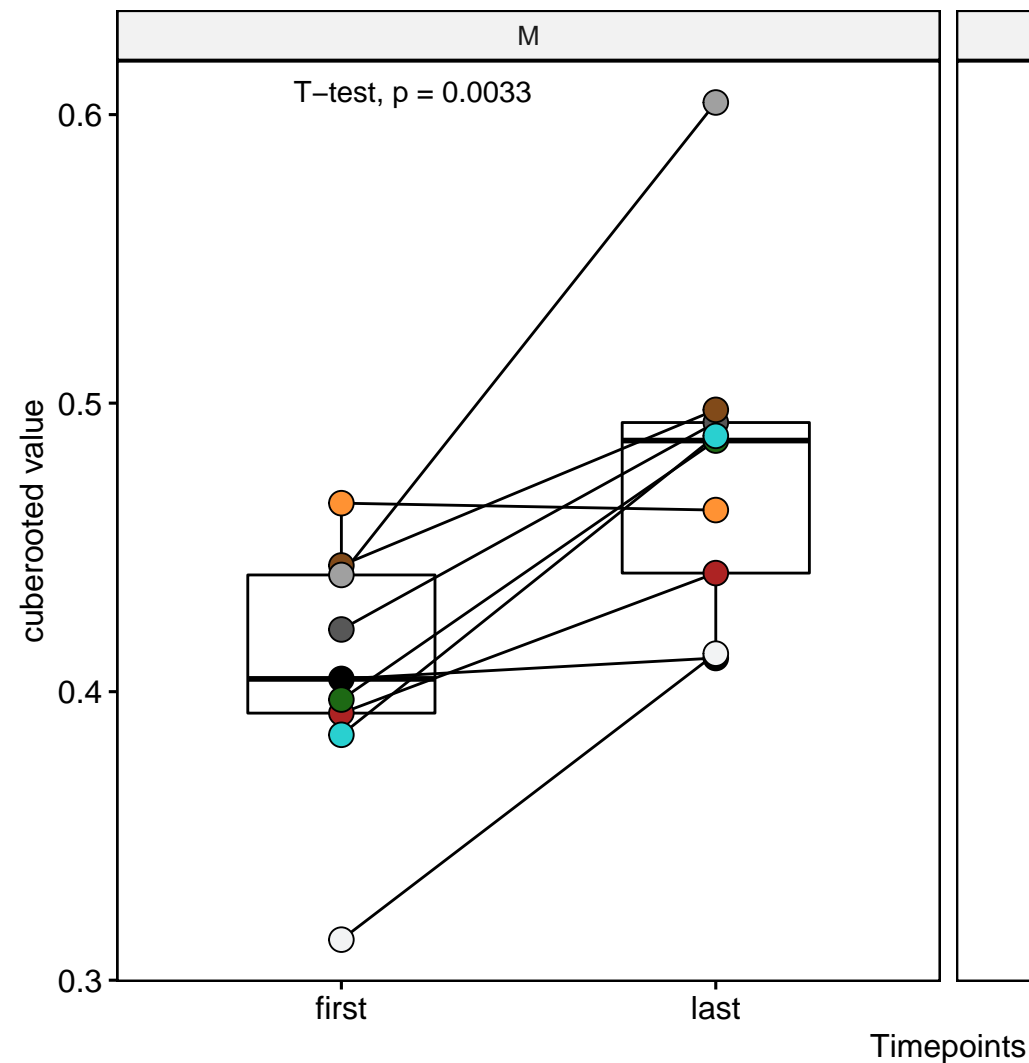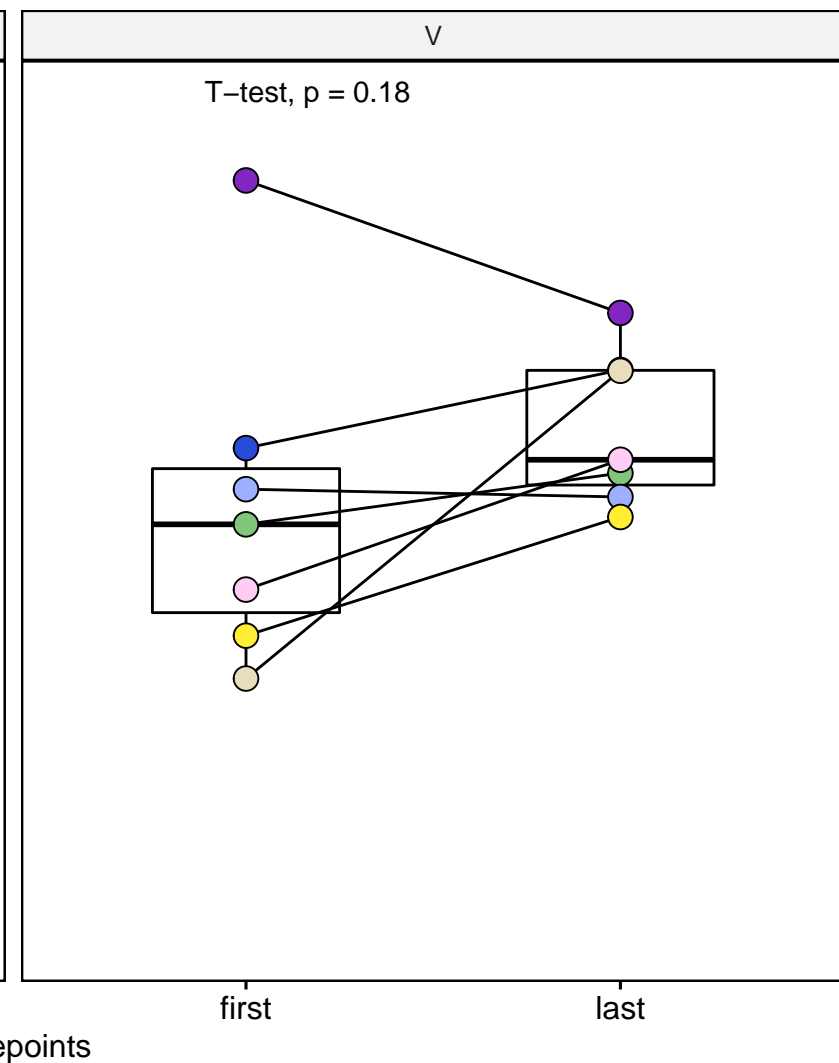

# L.Lysine\_amines

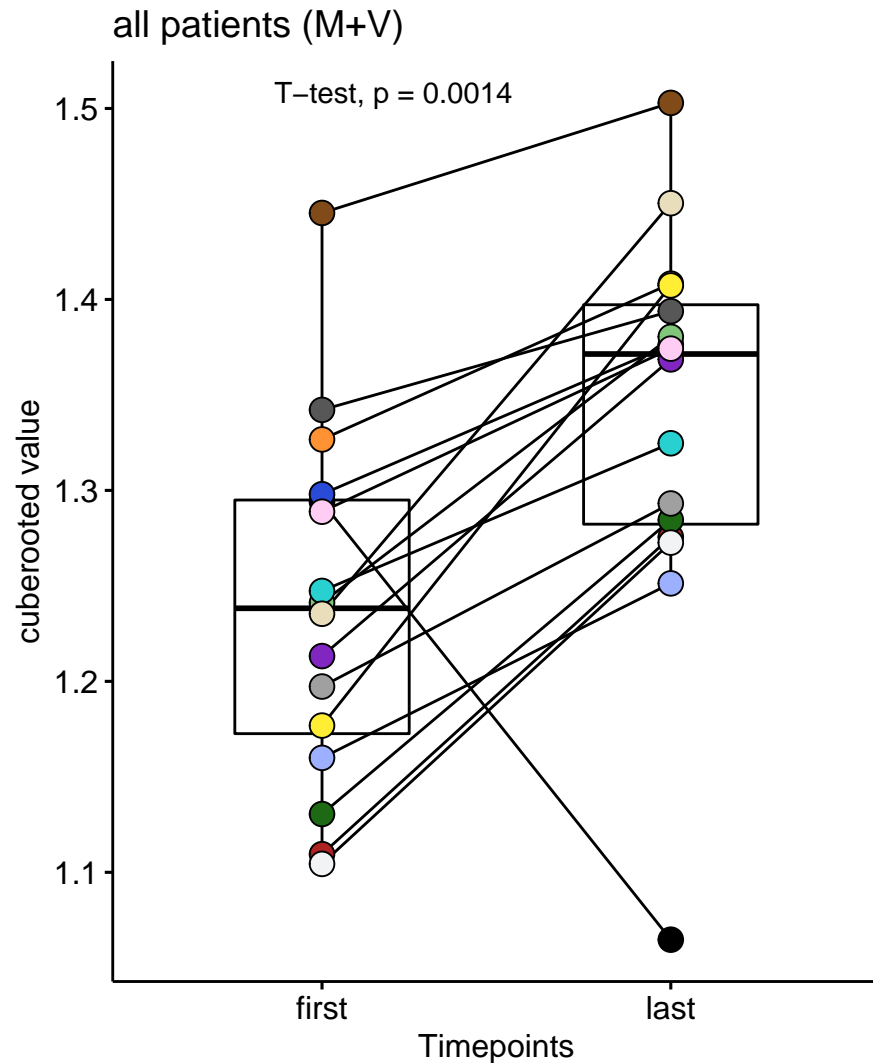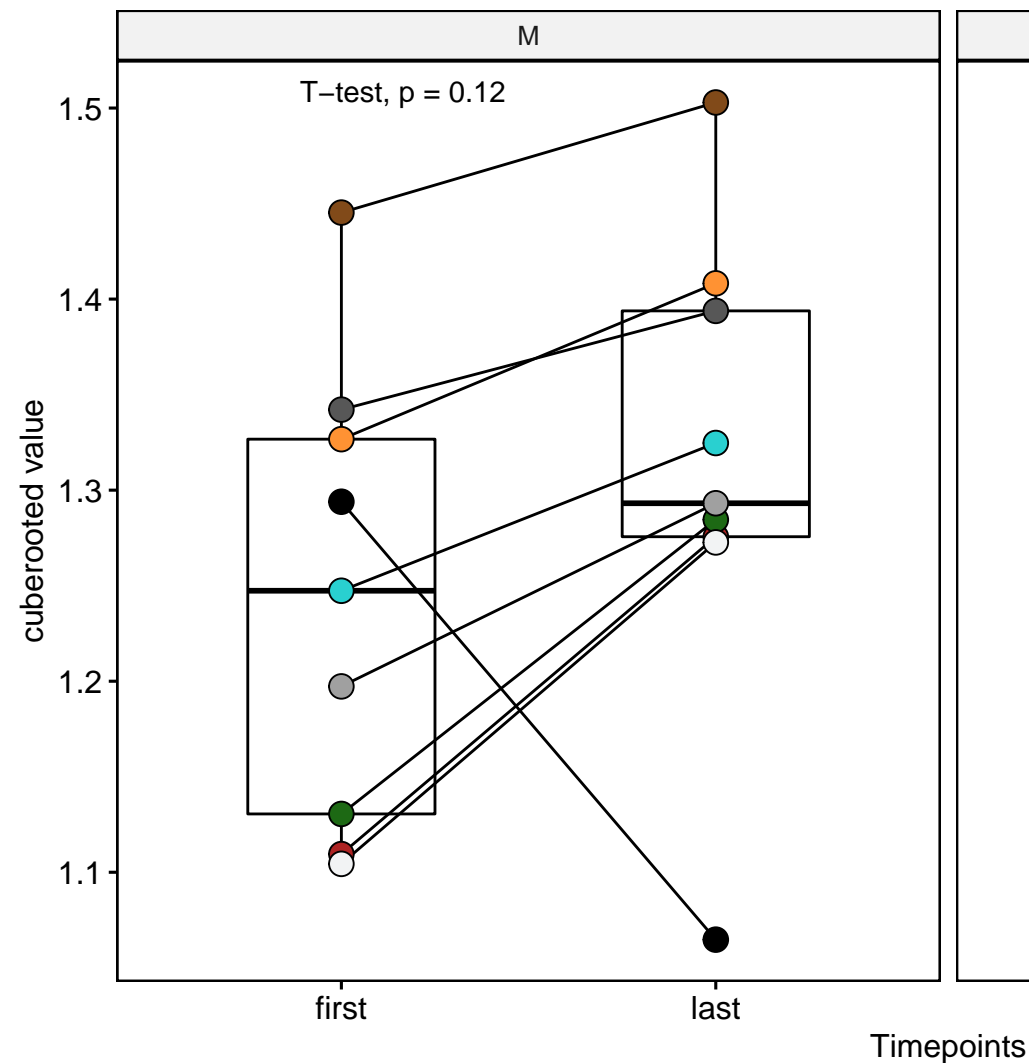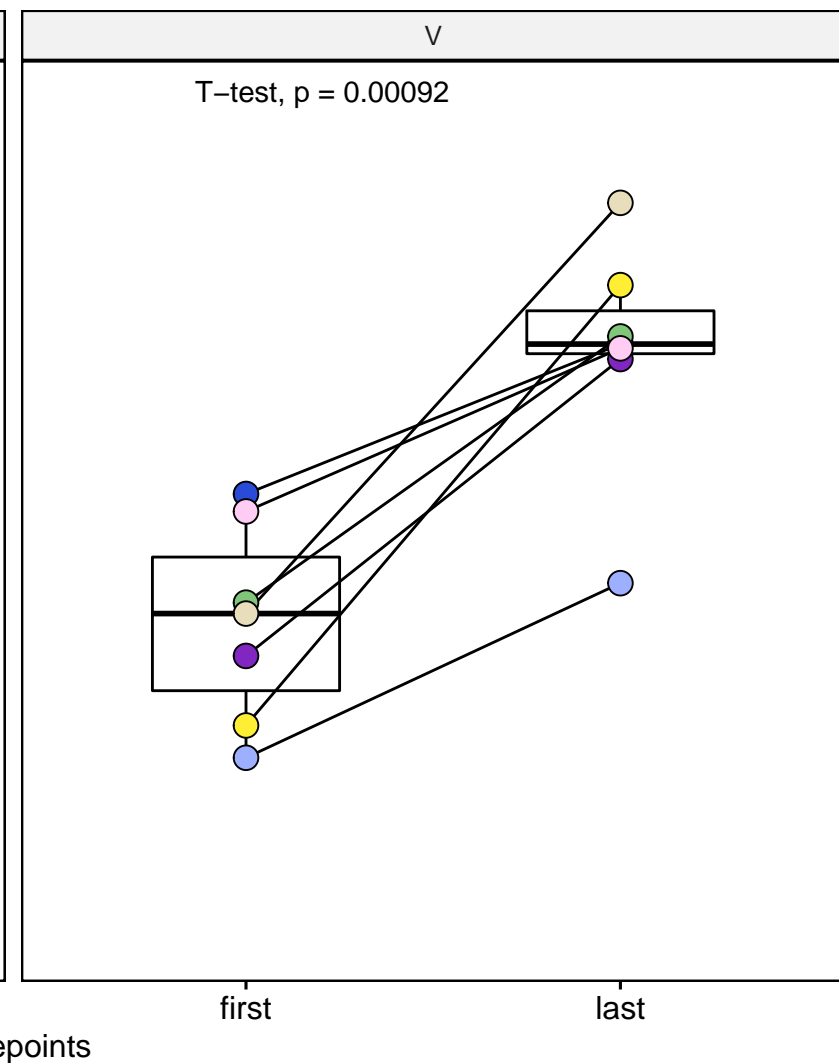

# O.Phosphoethanolamine\_amines

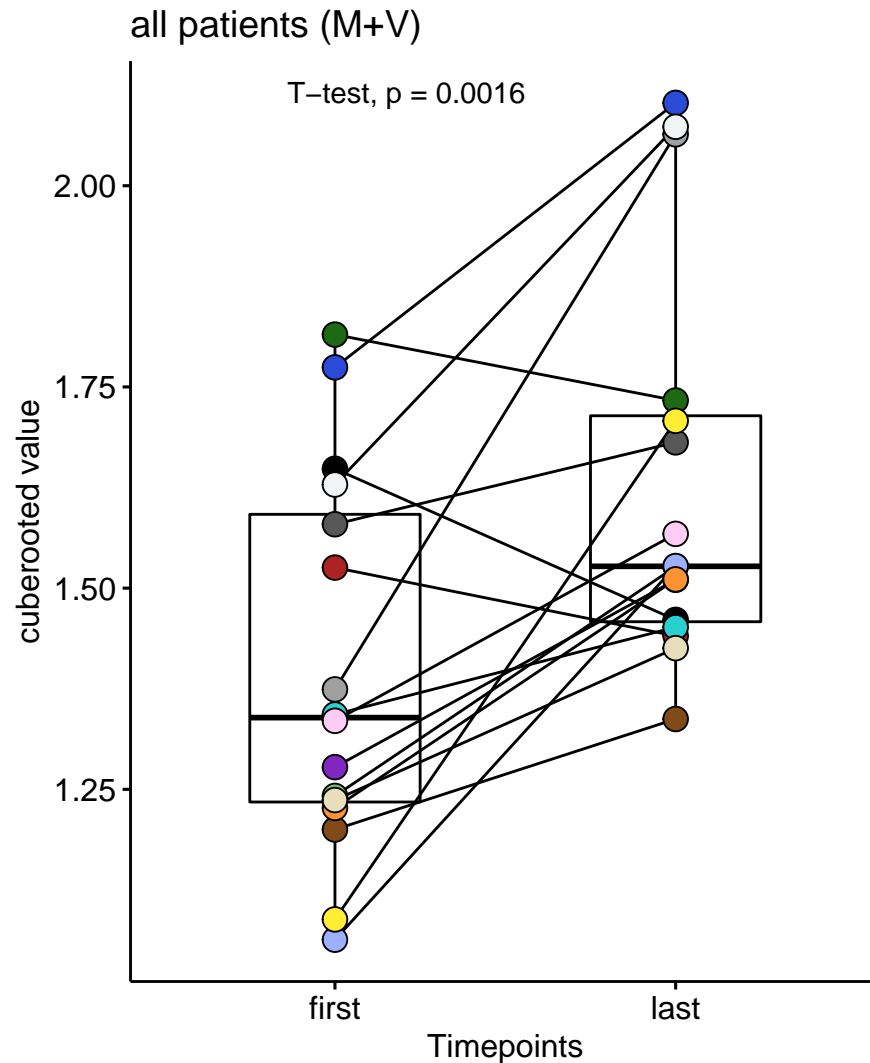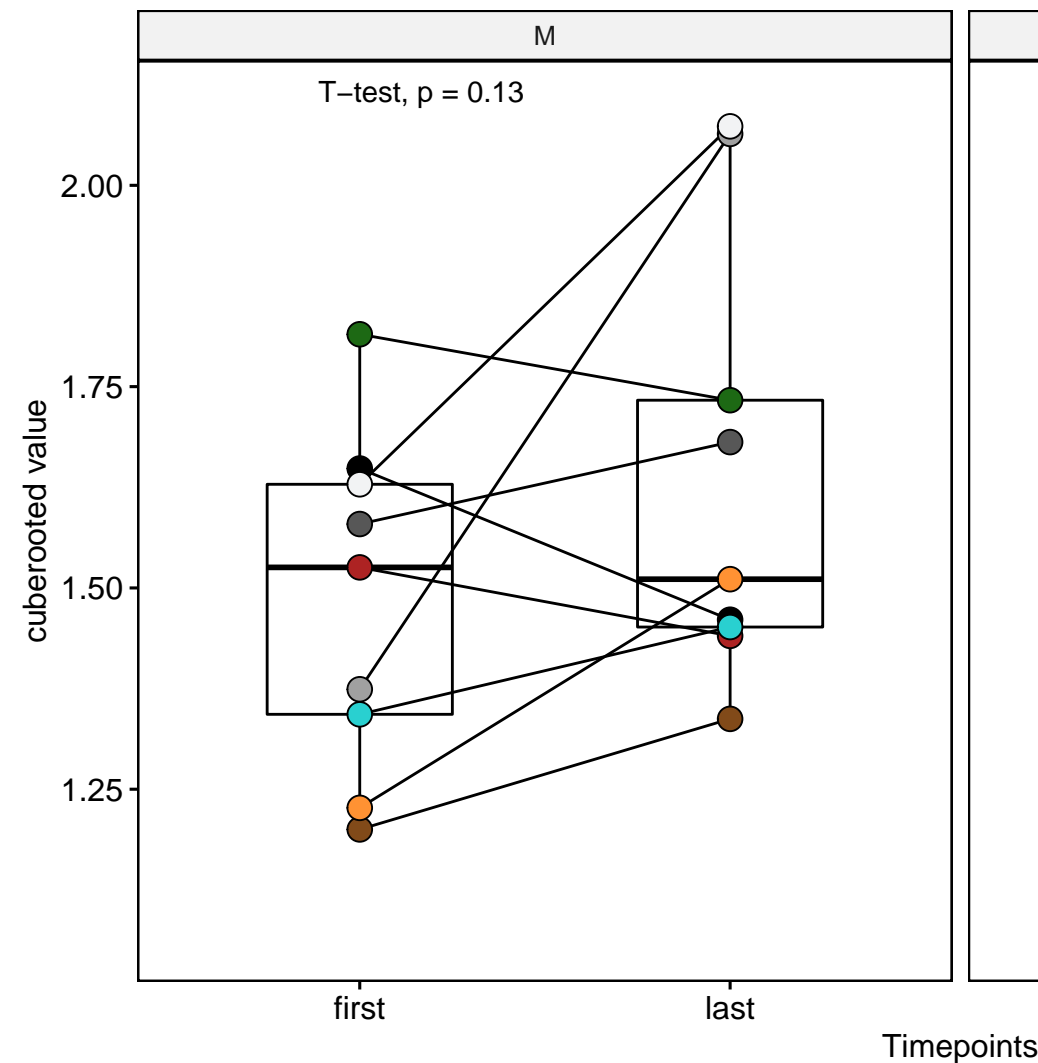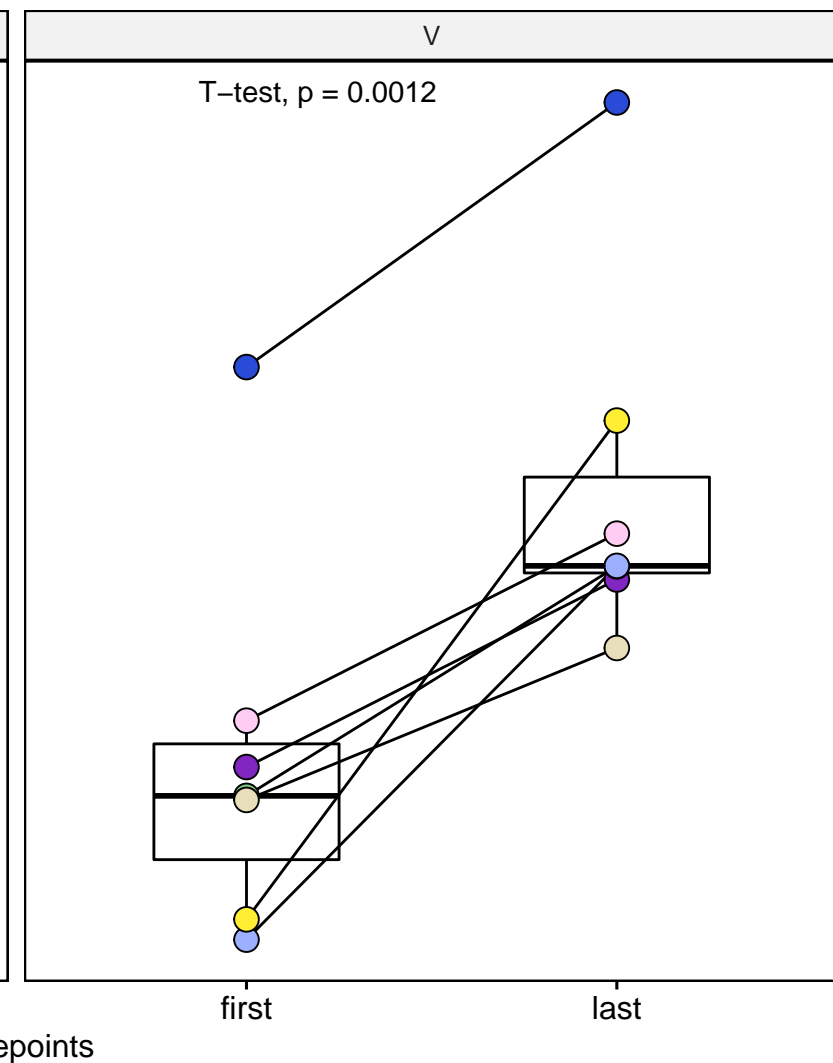

# L.Proline\_amines

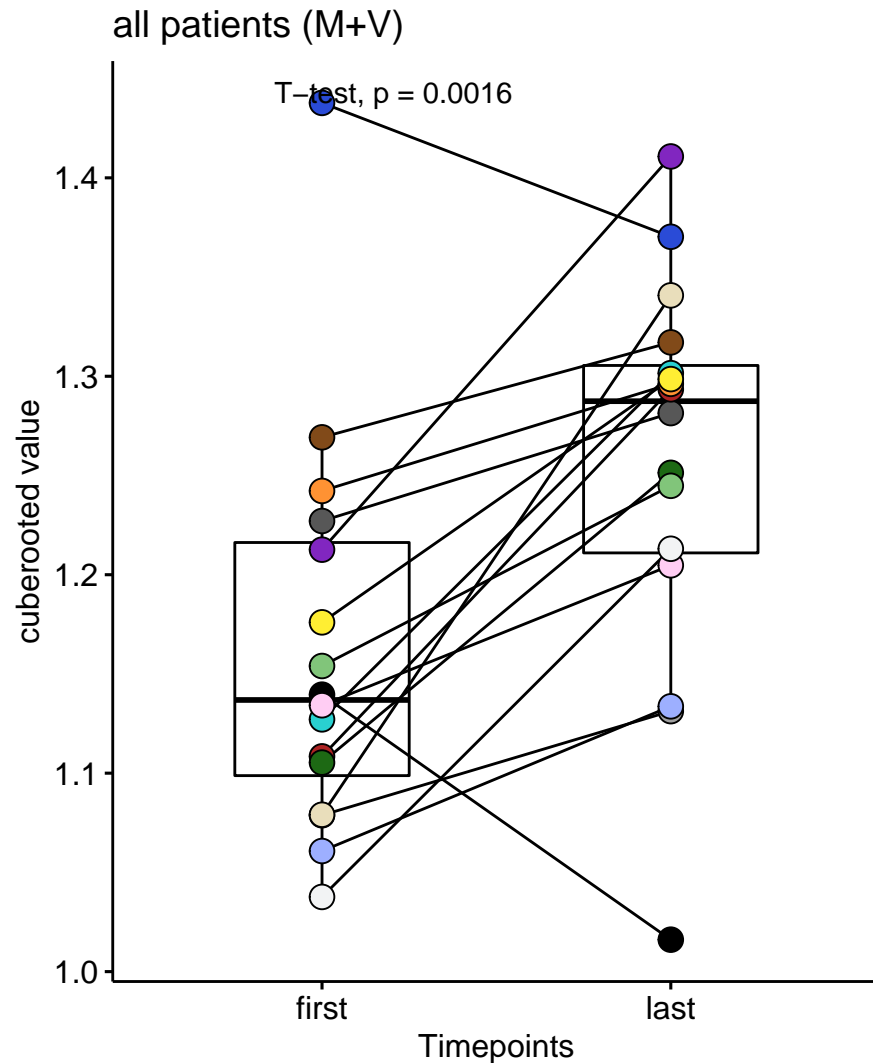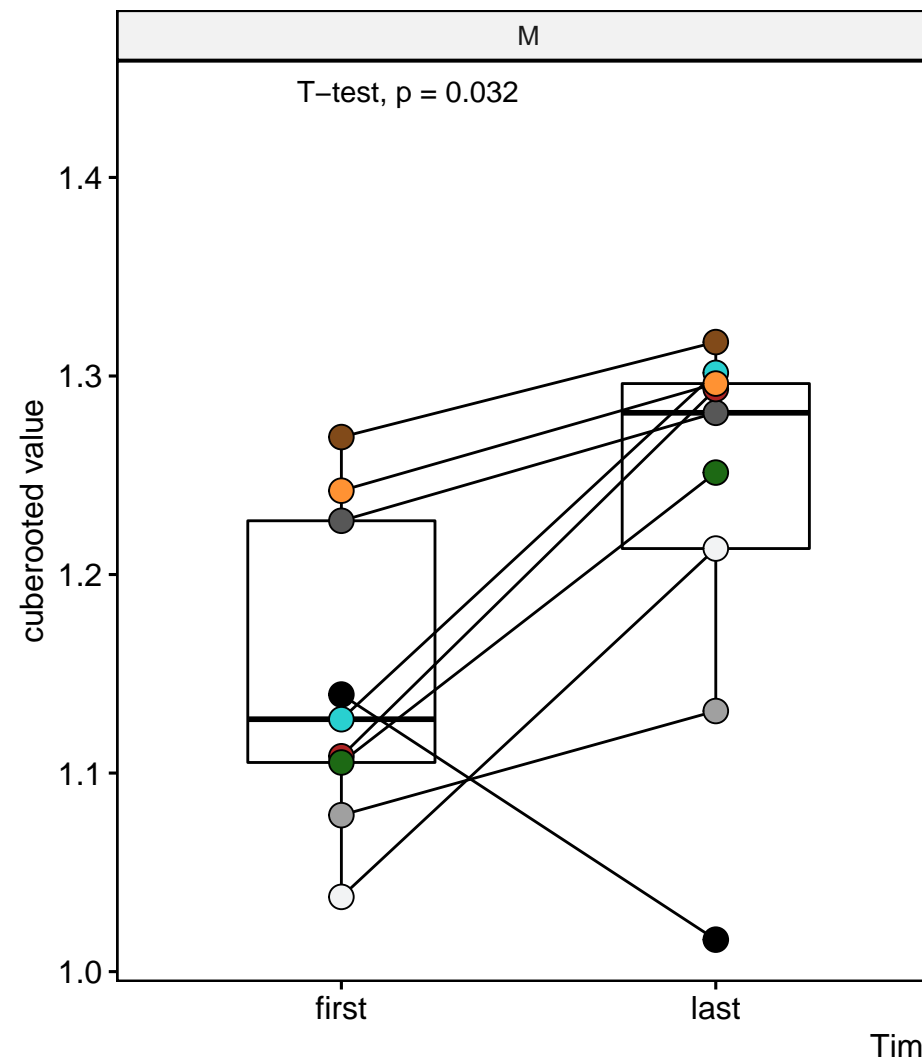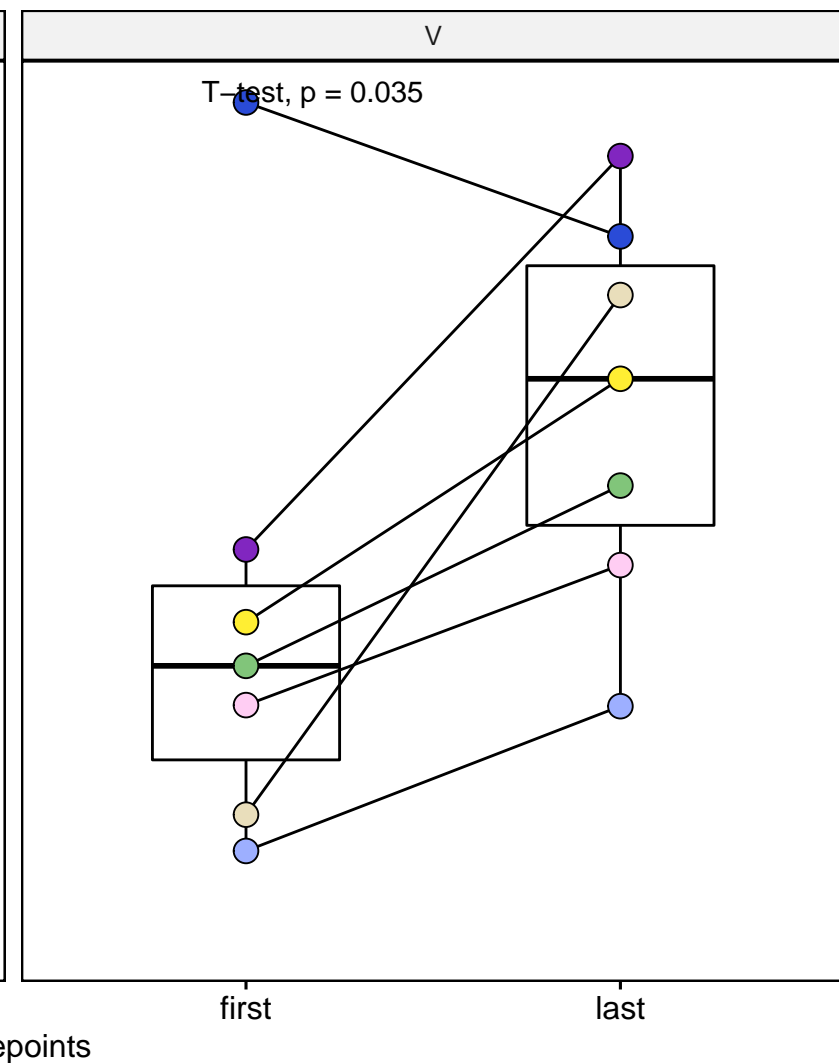

all patients (M+V)

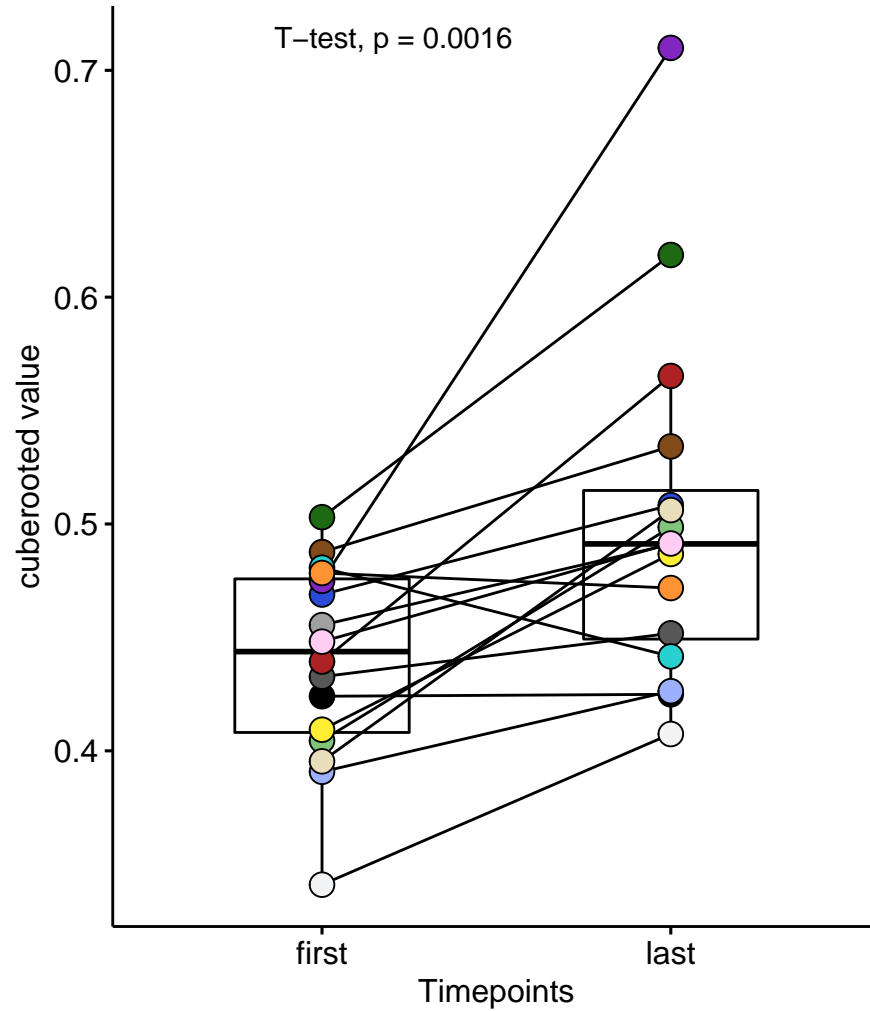

M

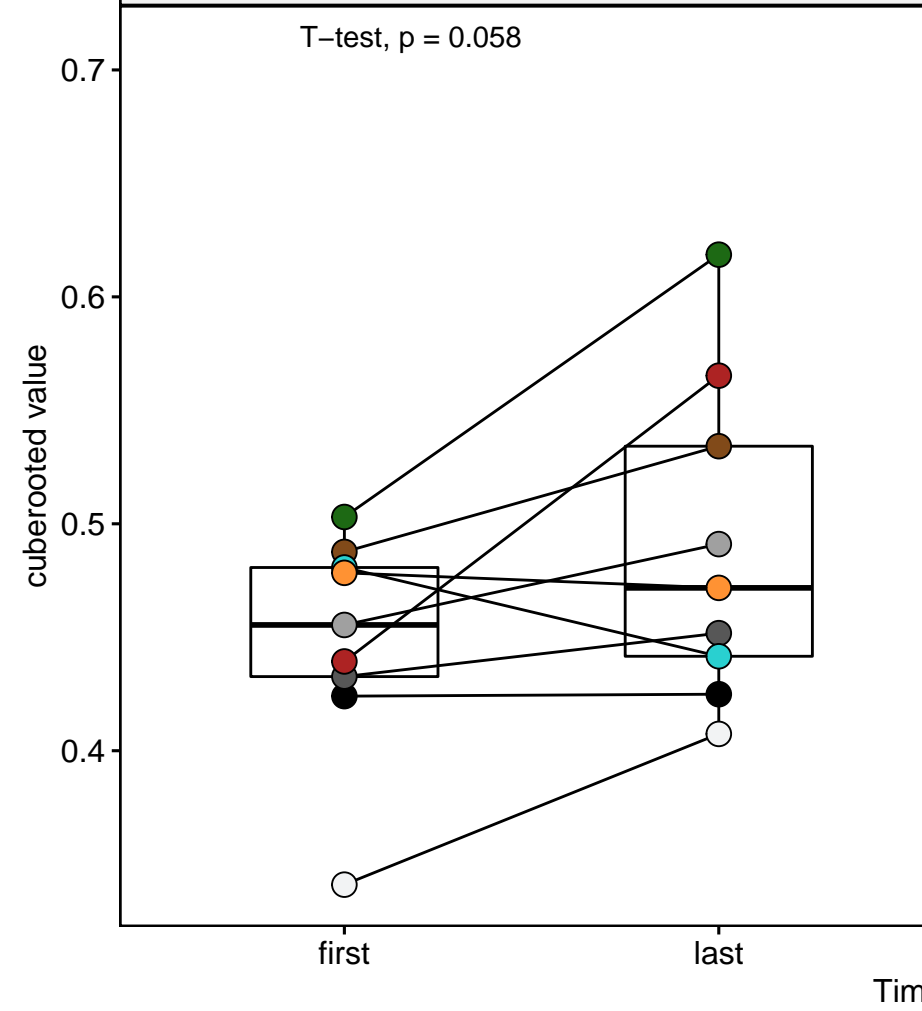

V

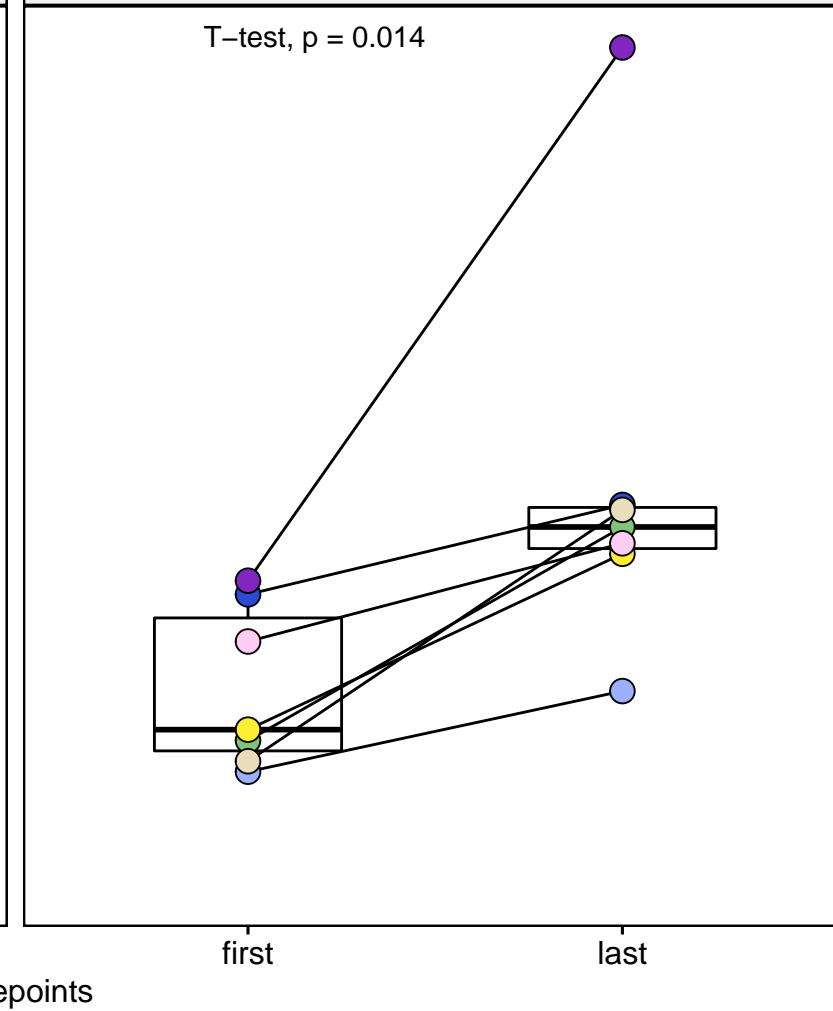

# L.Alanine\_amines

all patients (M+V)

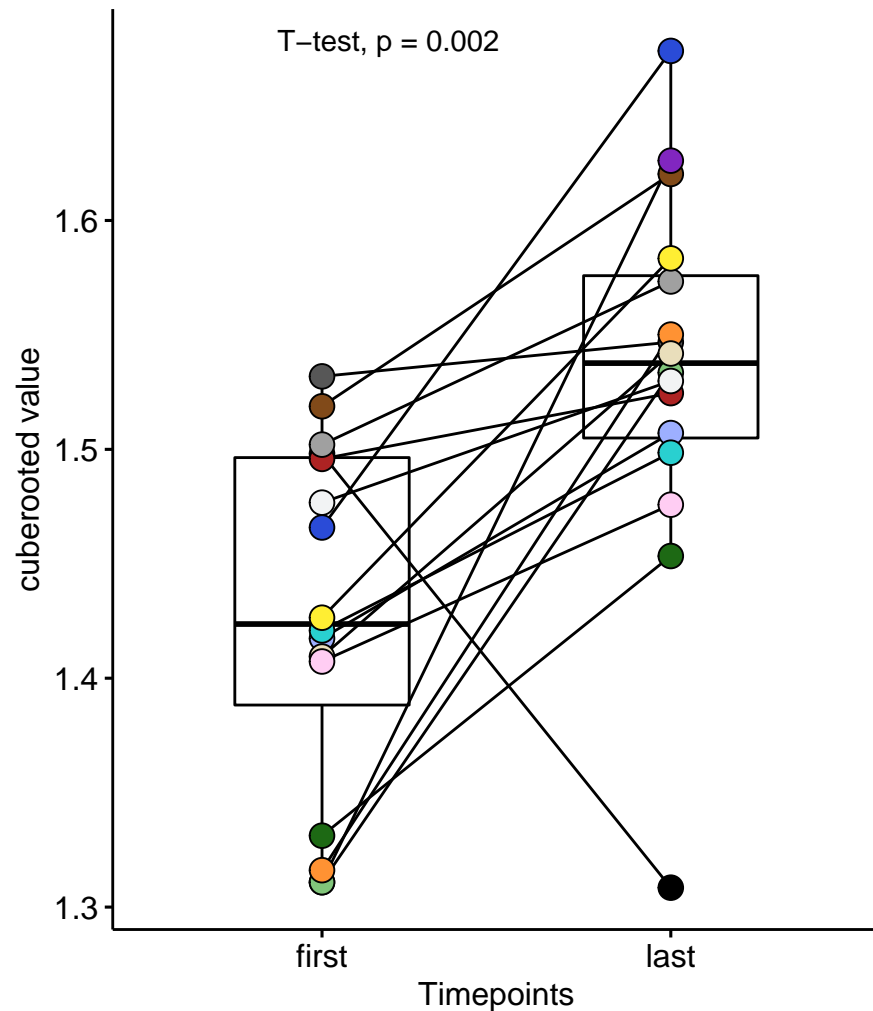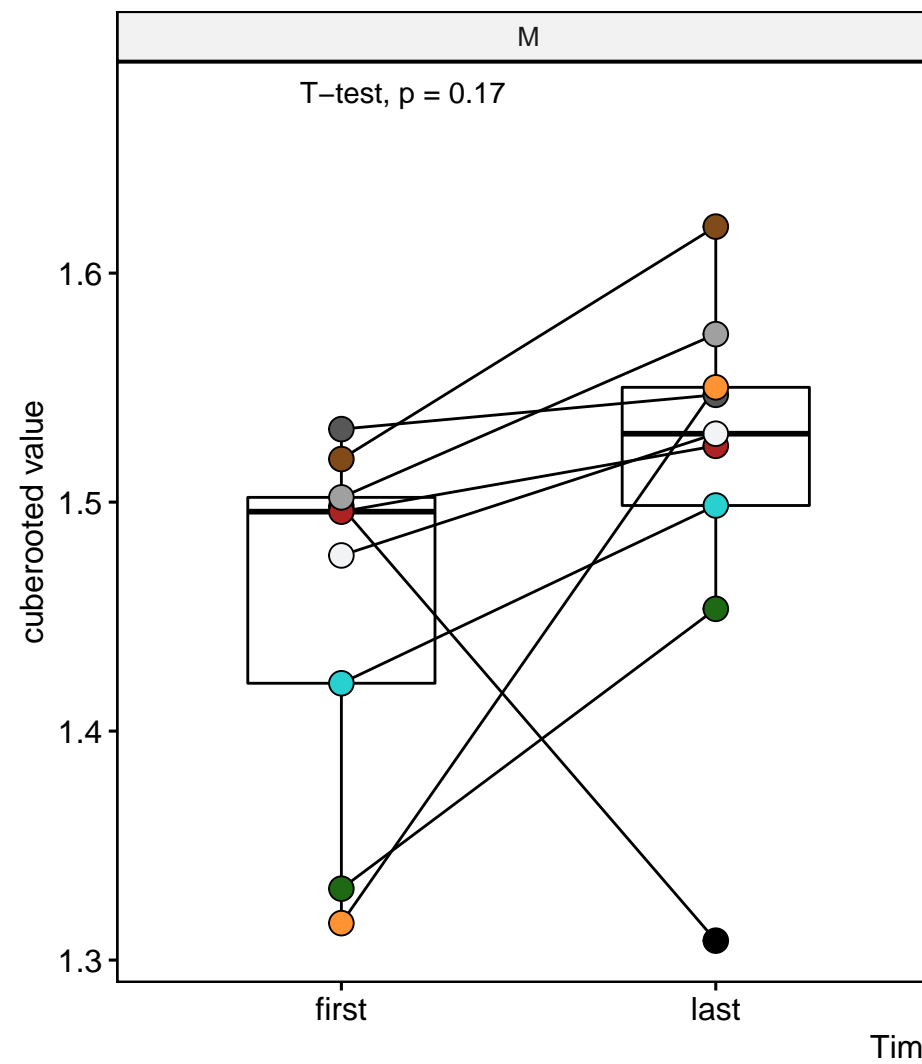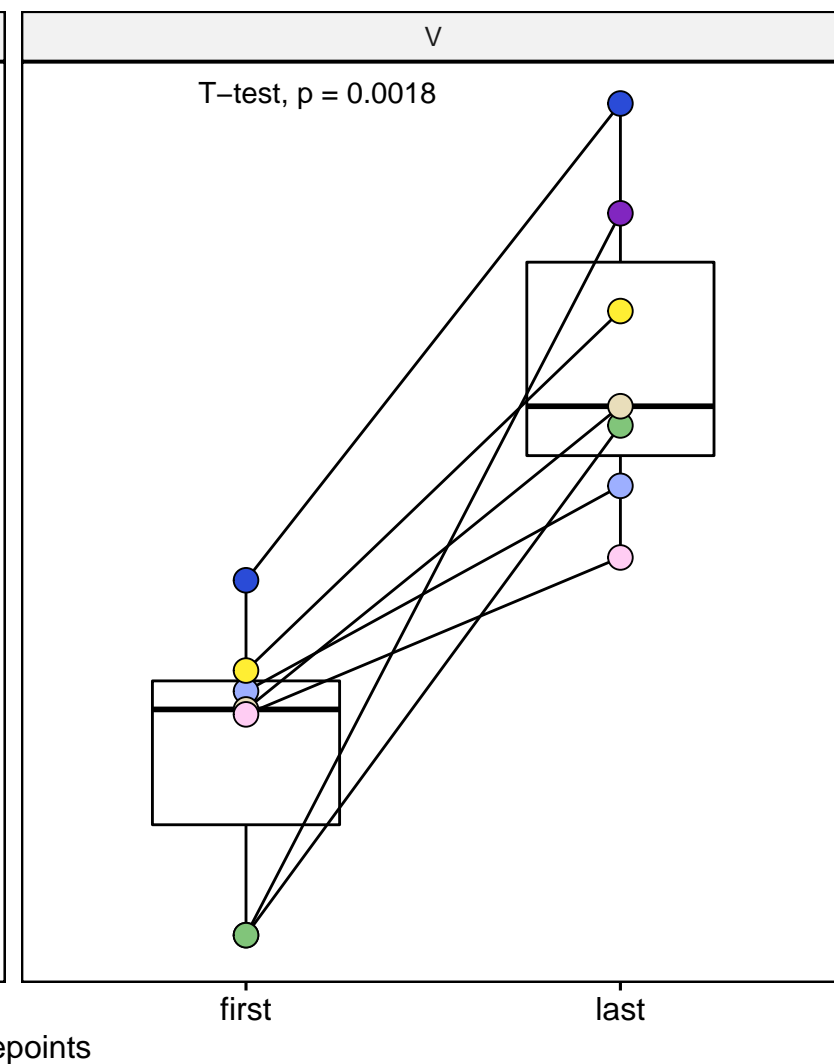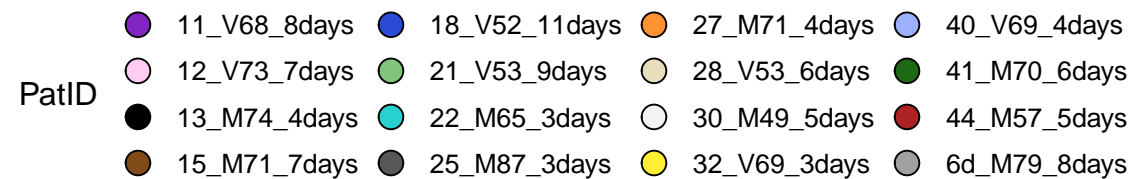

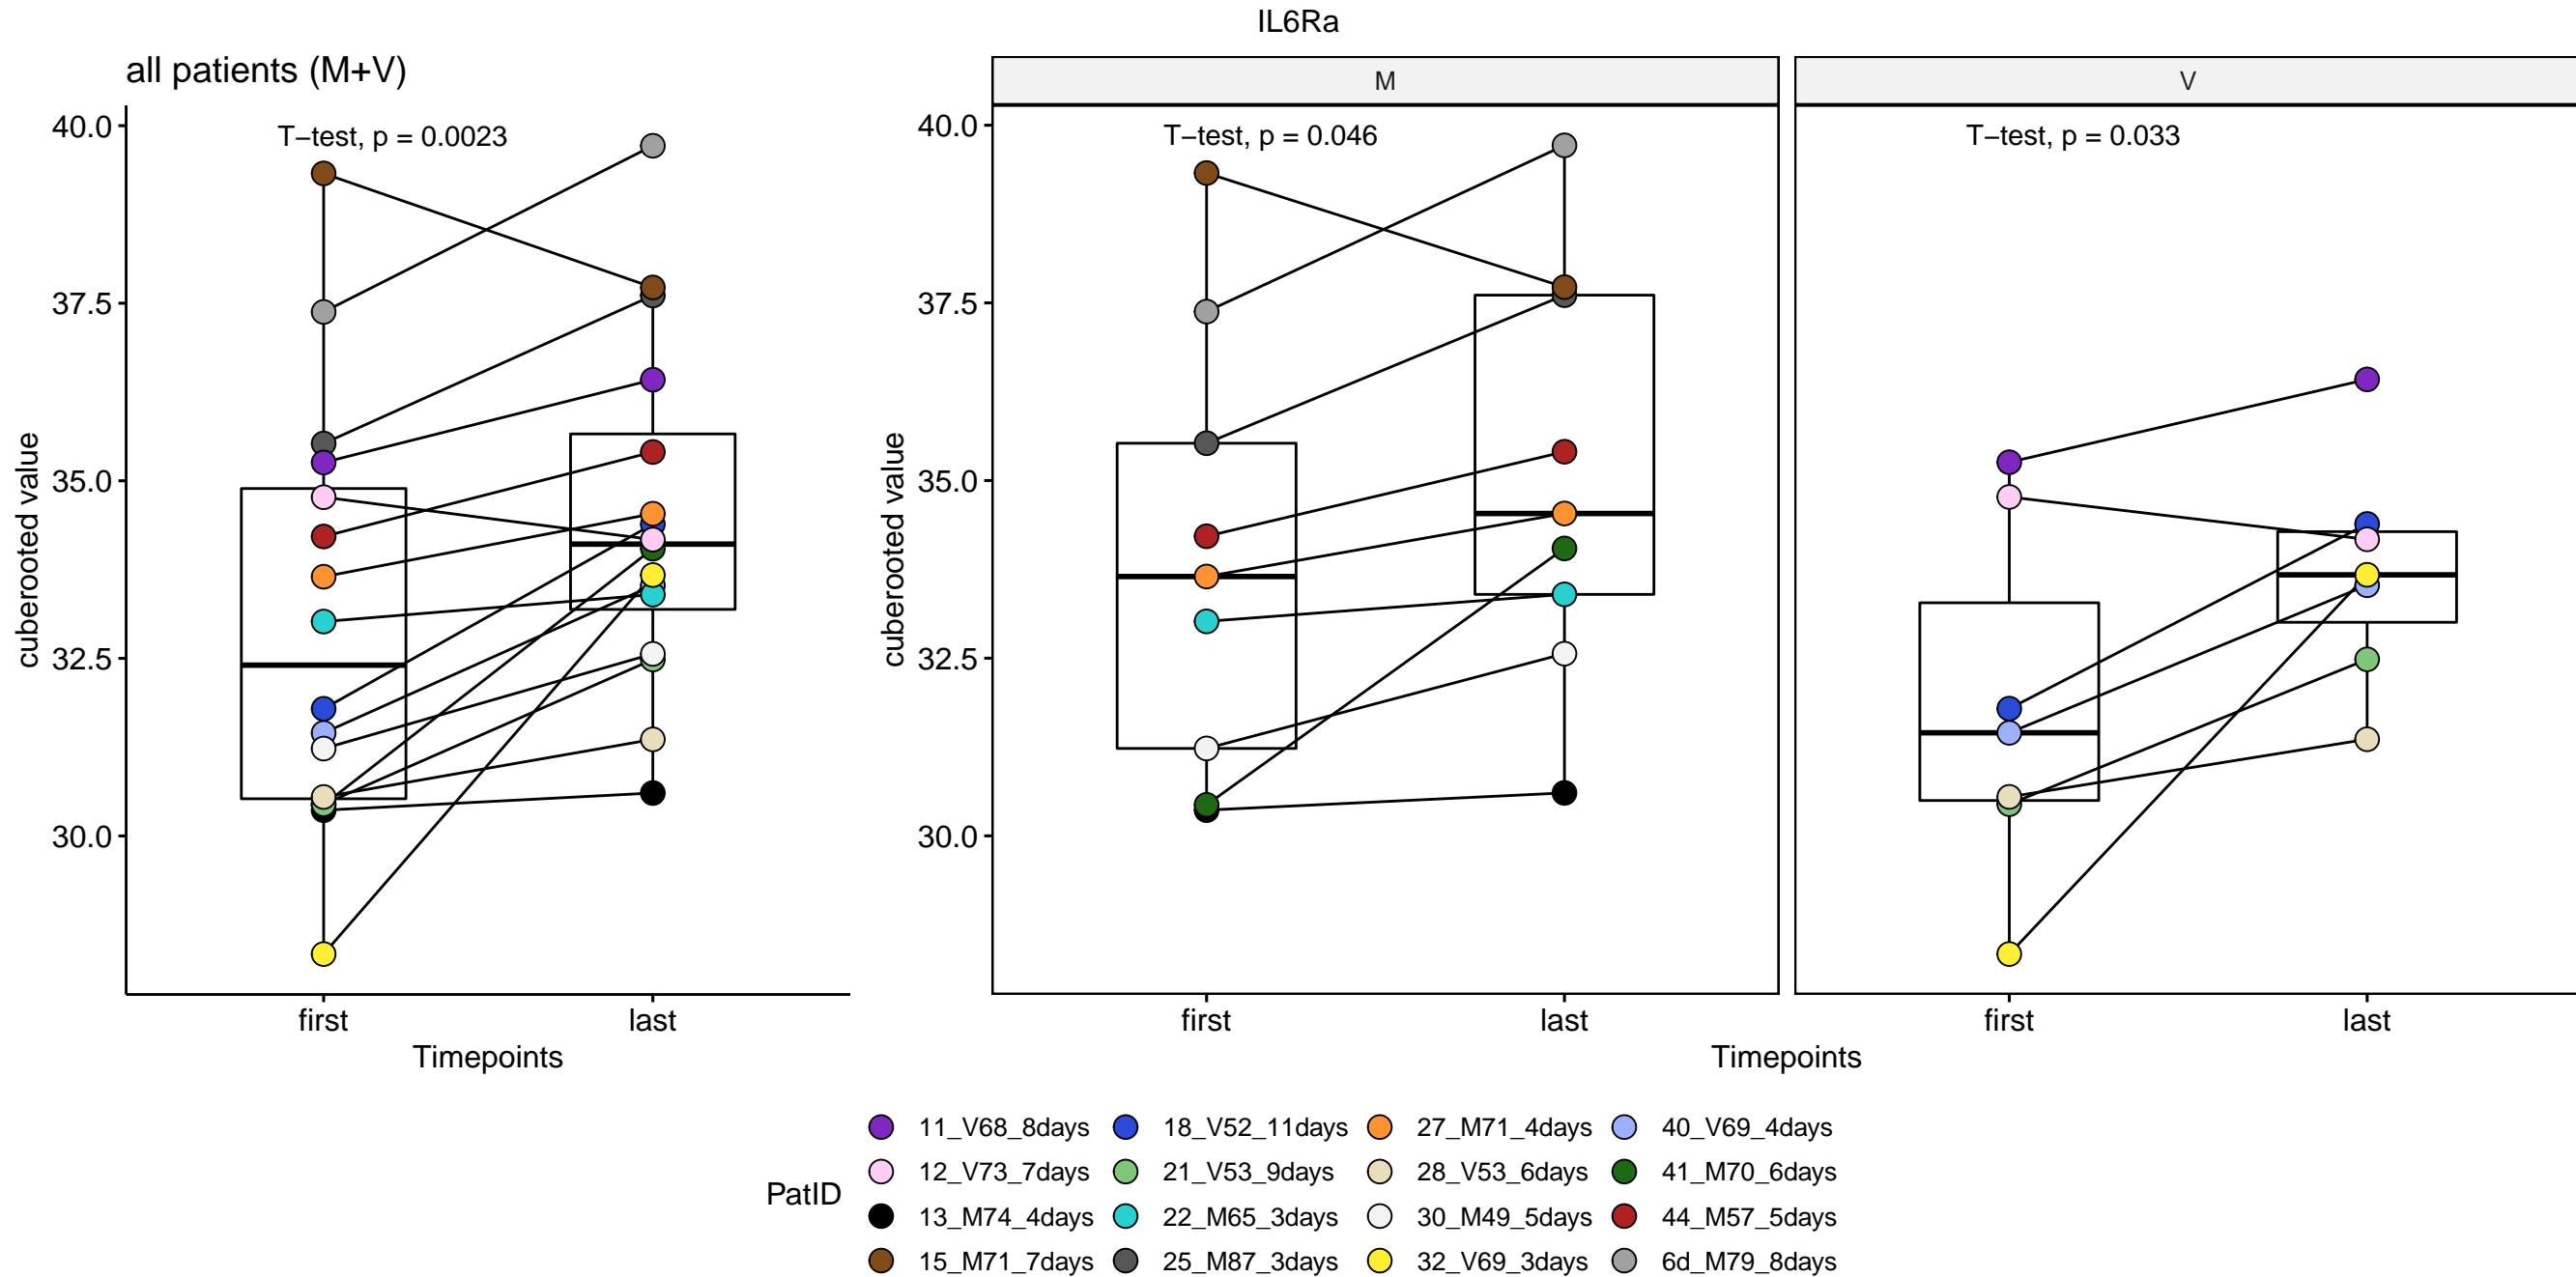



# IL18

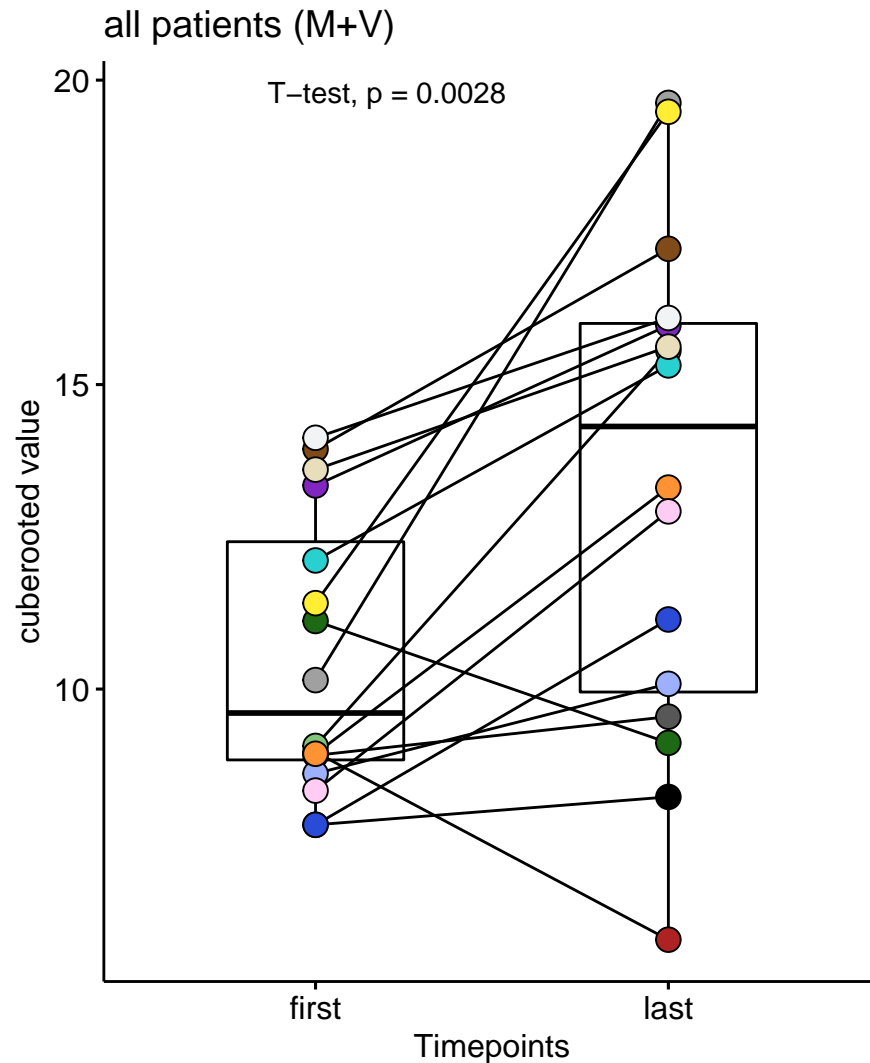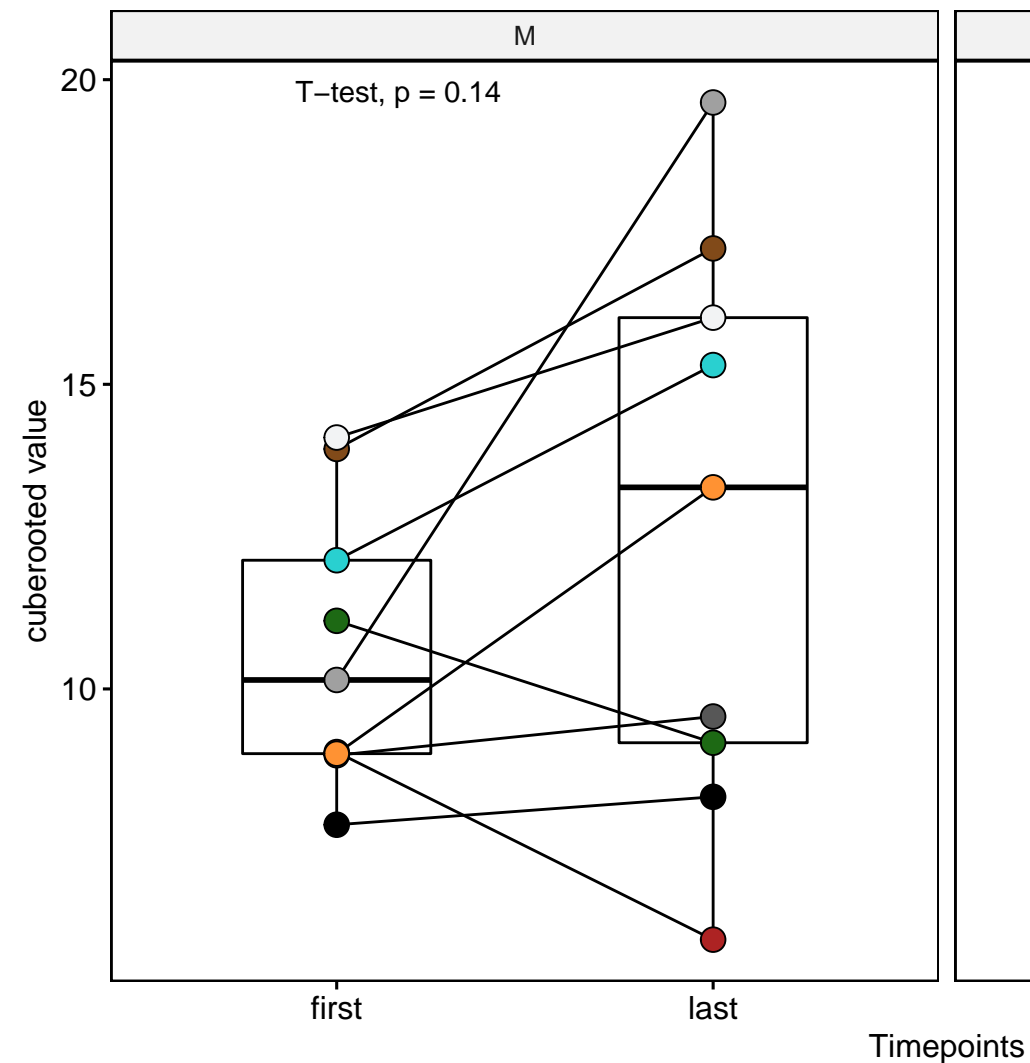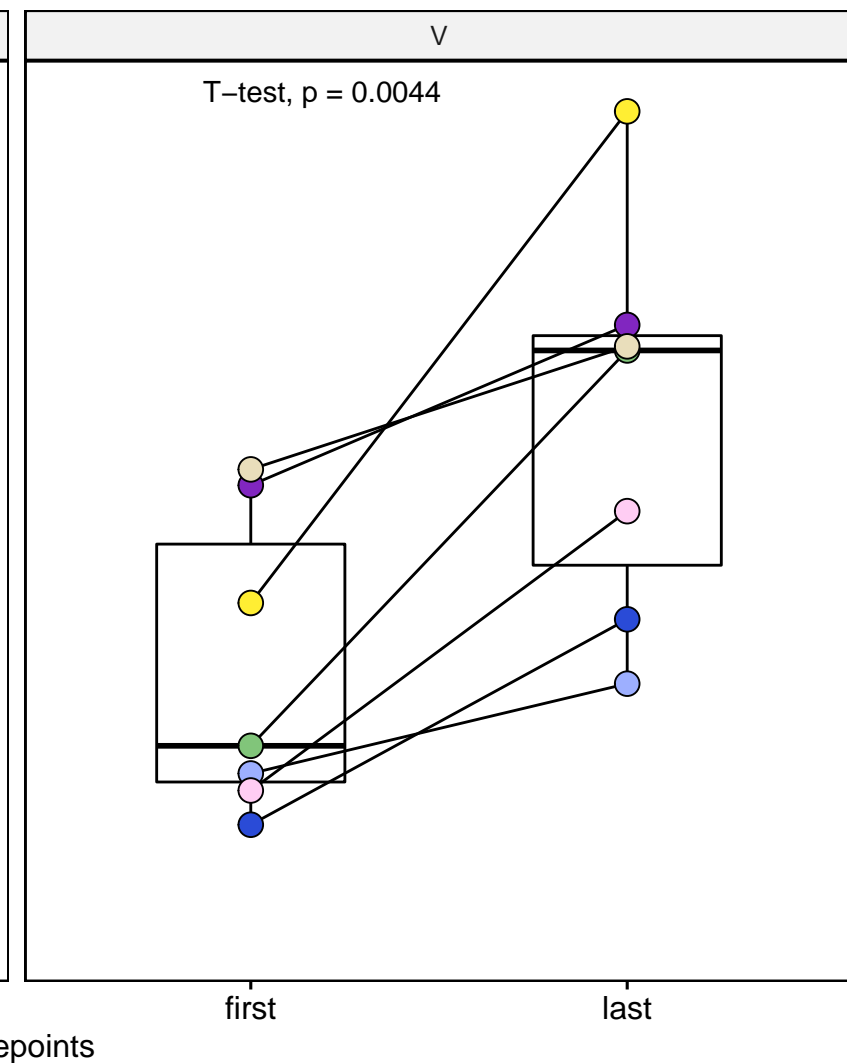

# L.Serine\_amines

all patients (M+V)

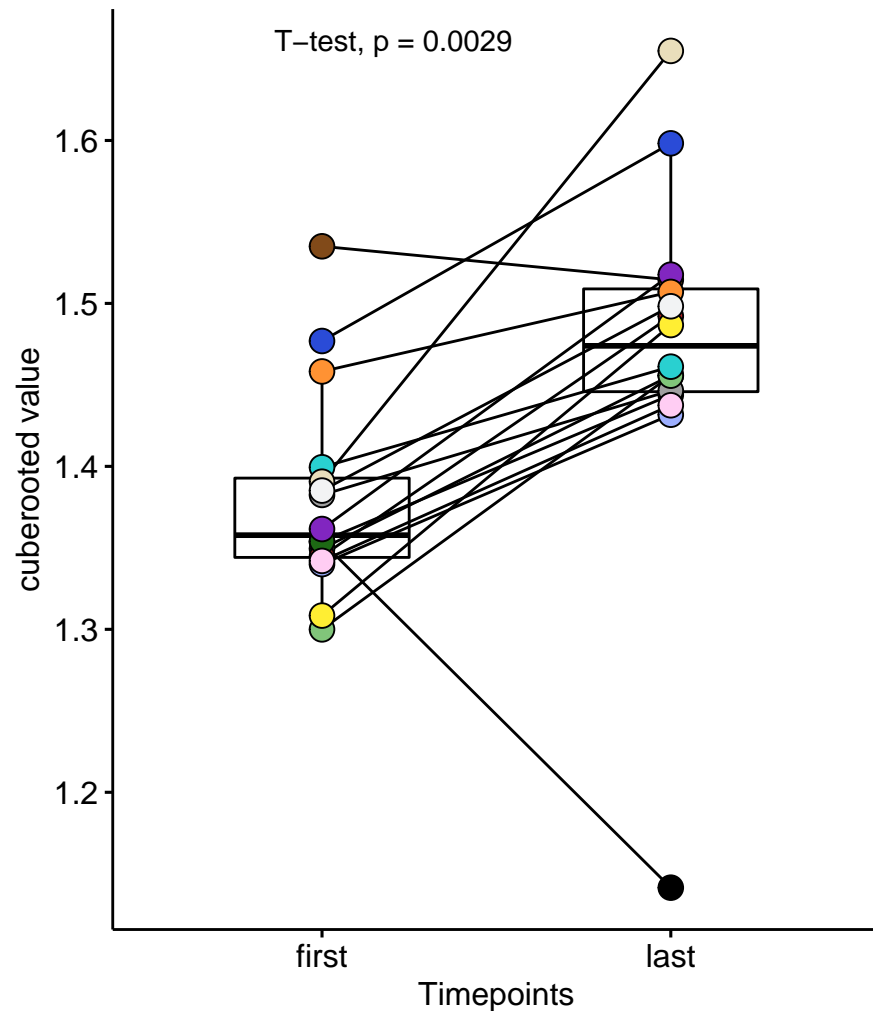

PatID

|              |               |              |              |
|--------------|---------------|--------------|--------------|
| 11_V68_8days | 18_V52_11days | 27_M71_4days | 40_V69_4days |
| 12_V73_7days | 21_V53_9days  | 28_V53_6days | 41_M70_6days |
| 13_M74_4days | 22_M65_3days  | 30_M49_5days | 44_M57_5days |
| 15_M71_7days | 25_M87_3days  | 32_V69_3days | 6d_M79_8days |

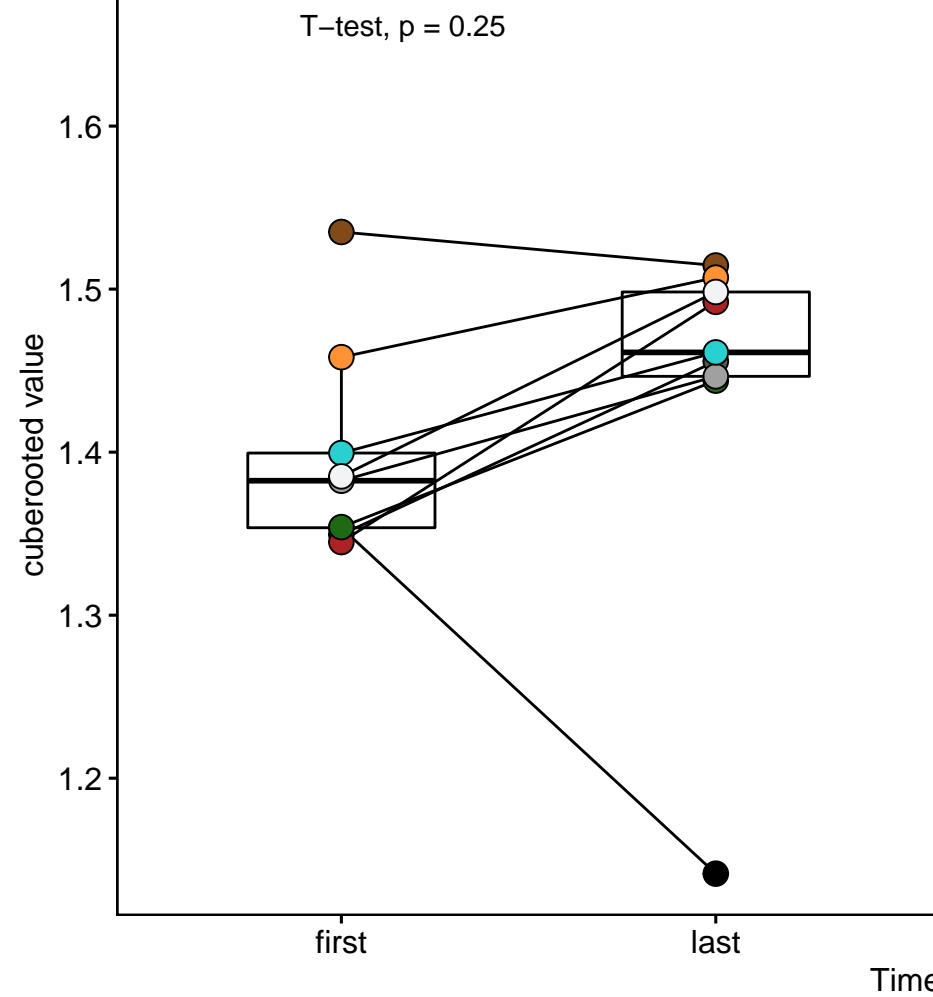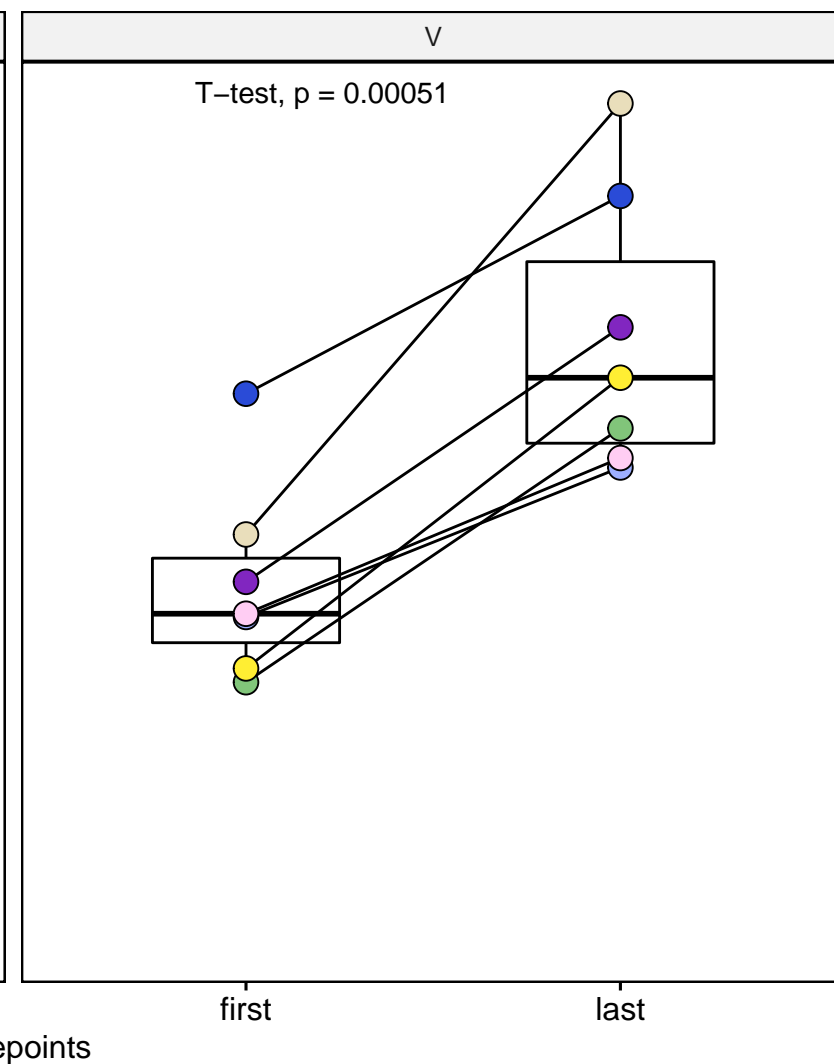

# L.Glutamic.acid\_amines

all patients (M+V)

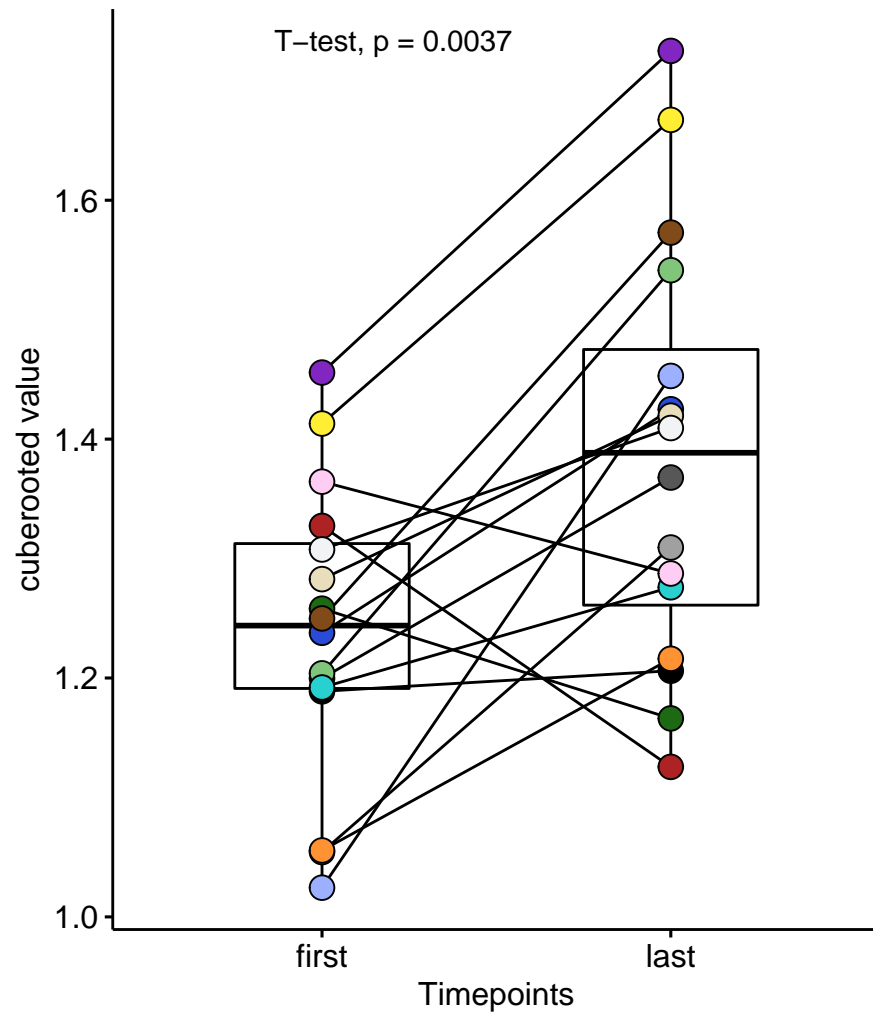

M

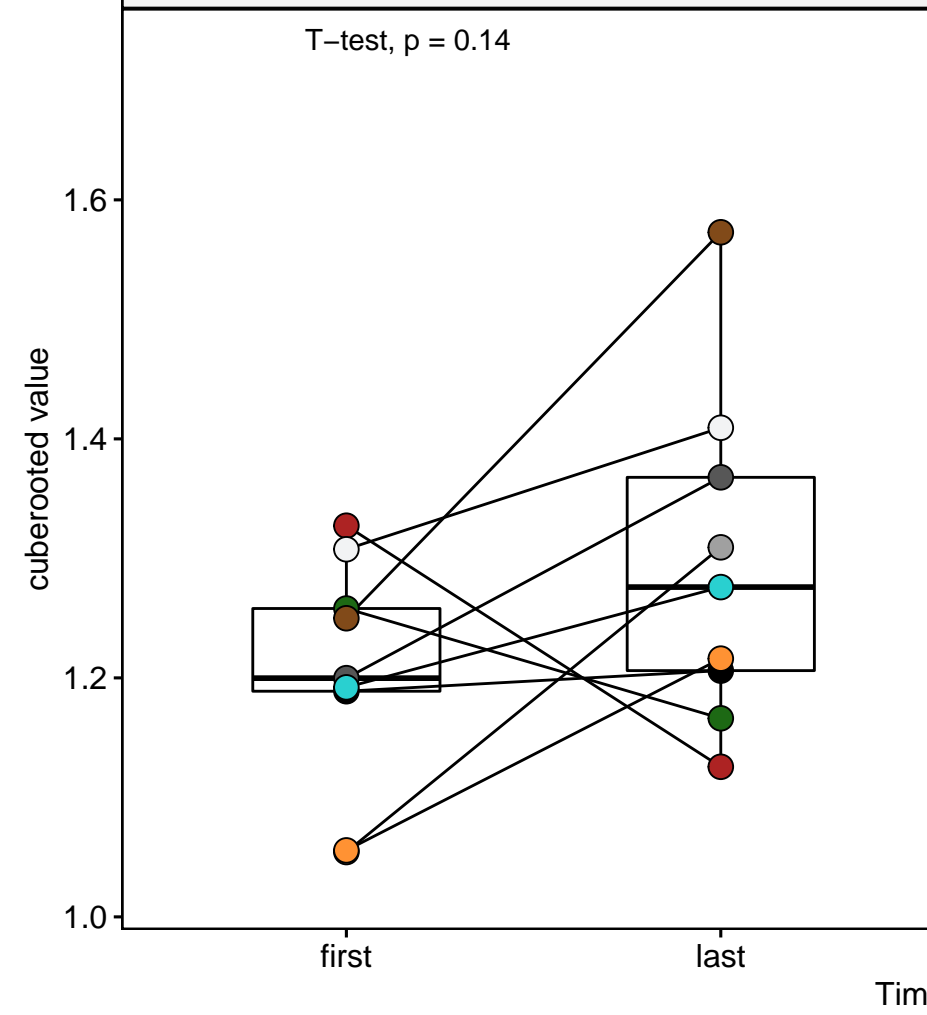

V

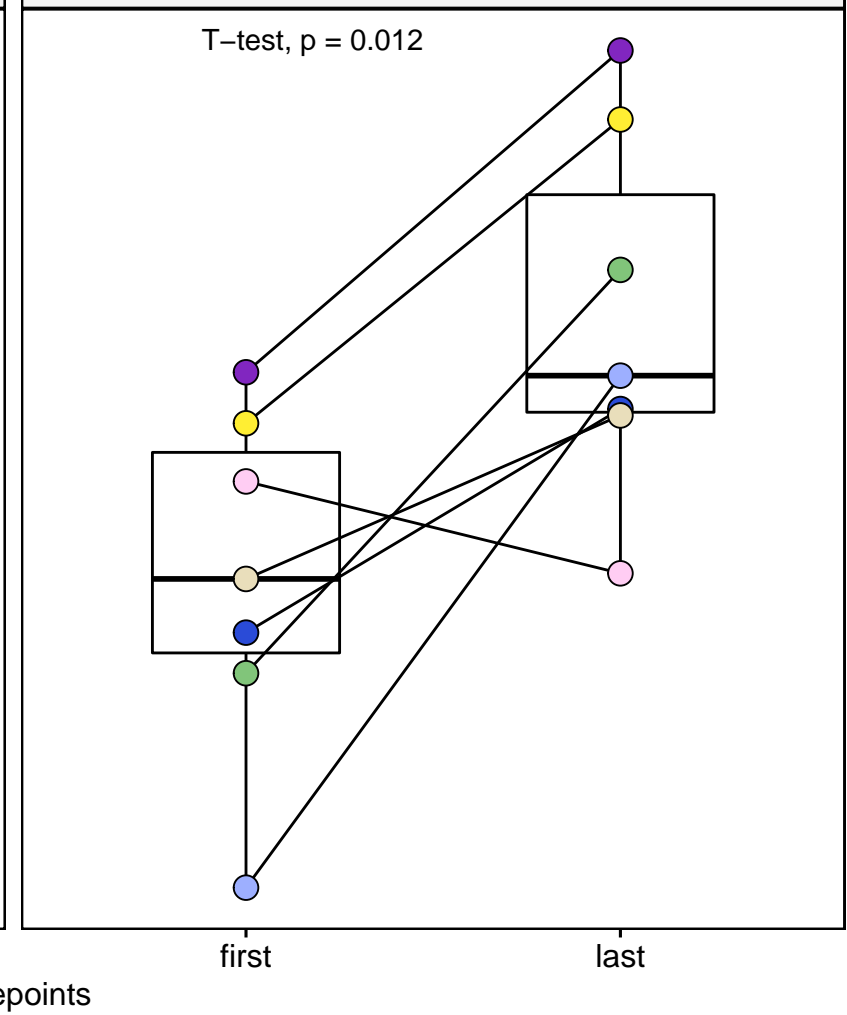

- PatID
- |              |               |              |              |
|--------------|---------------|--------------|--------------|
| 11_V68_8days | 18_V52_11days | 27_M71_4days | 40_V69_4days |
| 12_V73_7days | 21_V53_9days  | 28_V53_6days | 41_M70_6days |
| 13_M74_4days | 22_M65_3days  | 30_M49_5days | 44_M57_5days |
| 15_M71_7days | 25_M87_3days  | 32_V69_3days | 6d_M79_8days |

all patients (M+V)

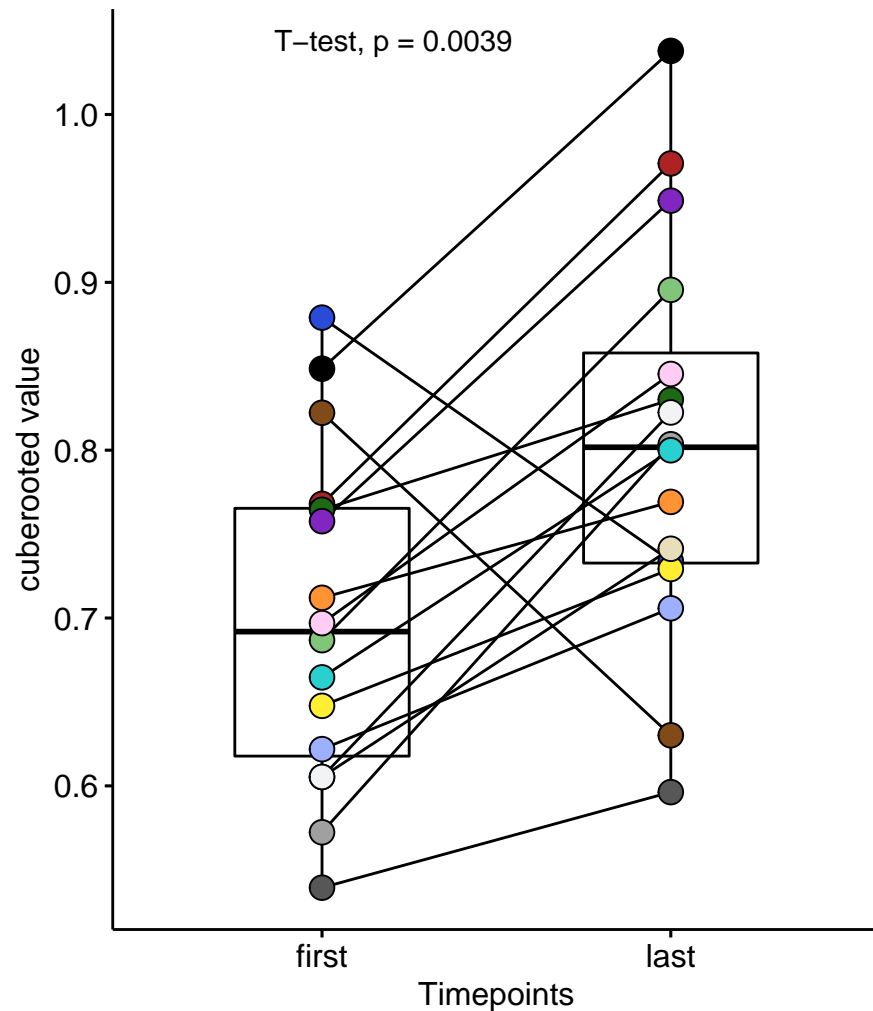

Monocytes

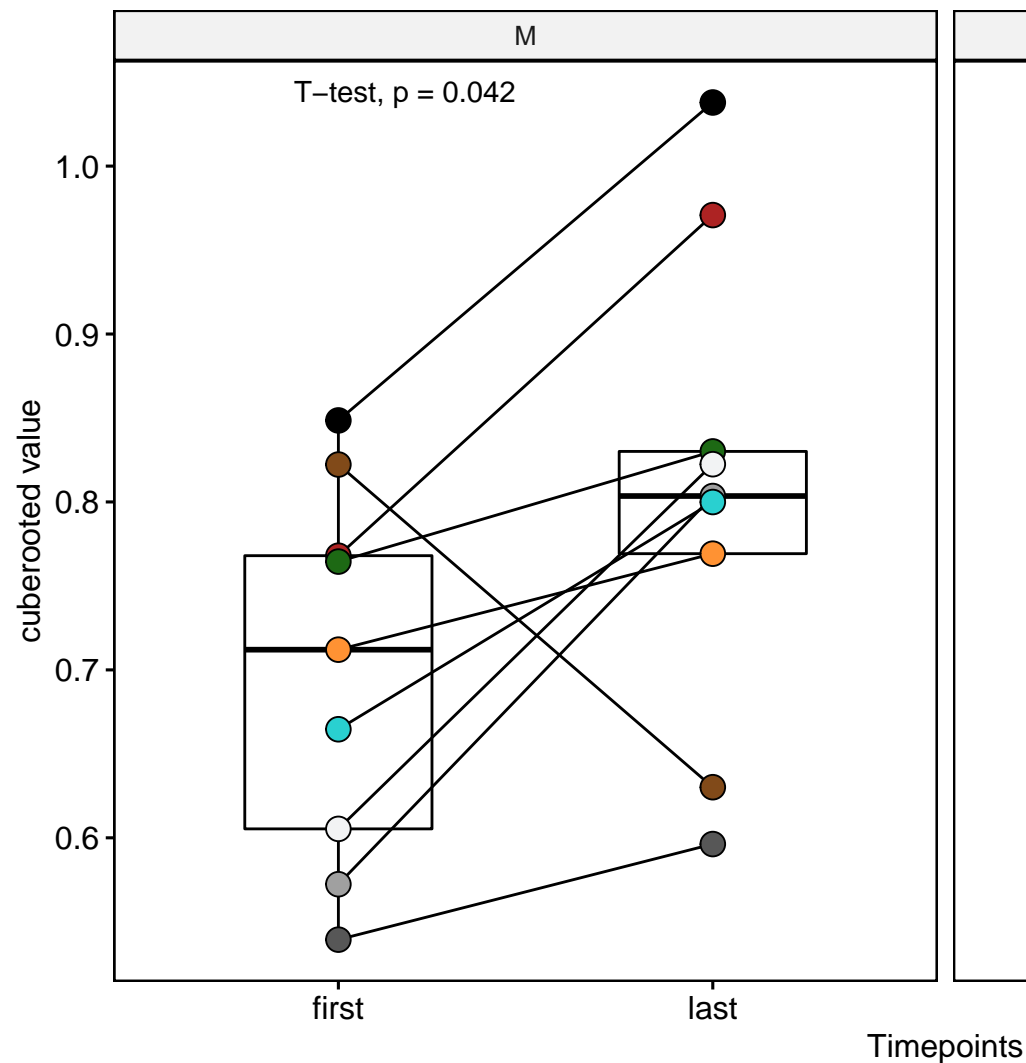

V

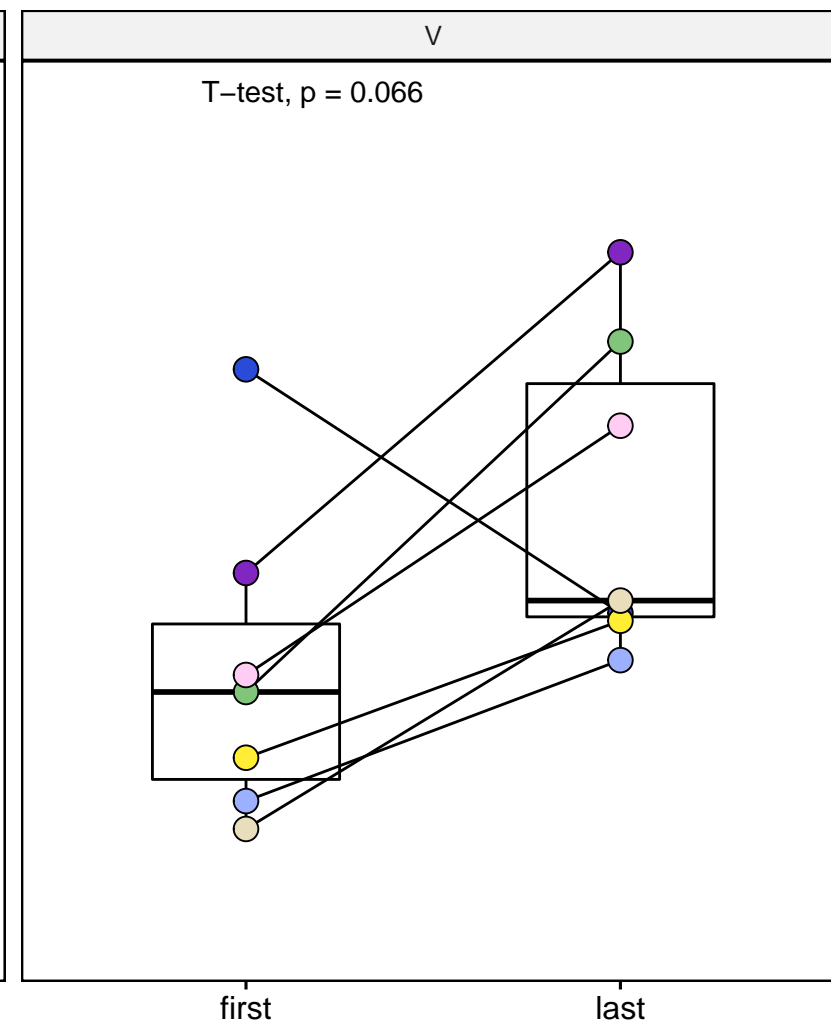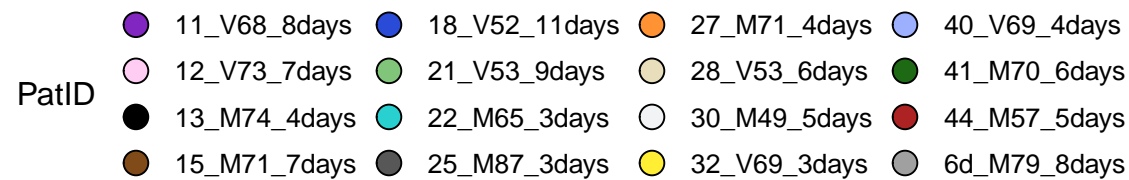

all patients (M+V)

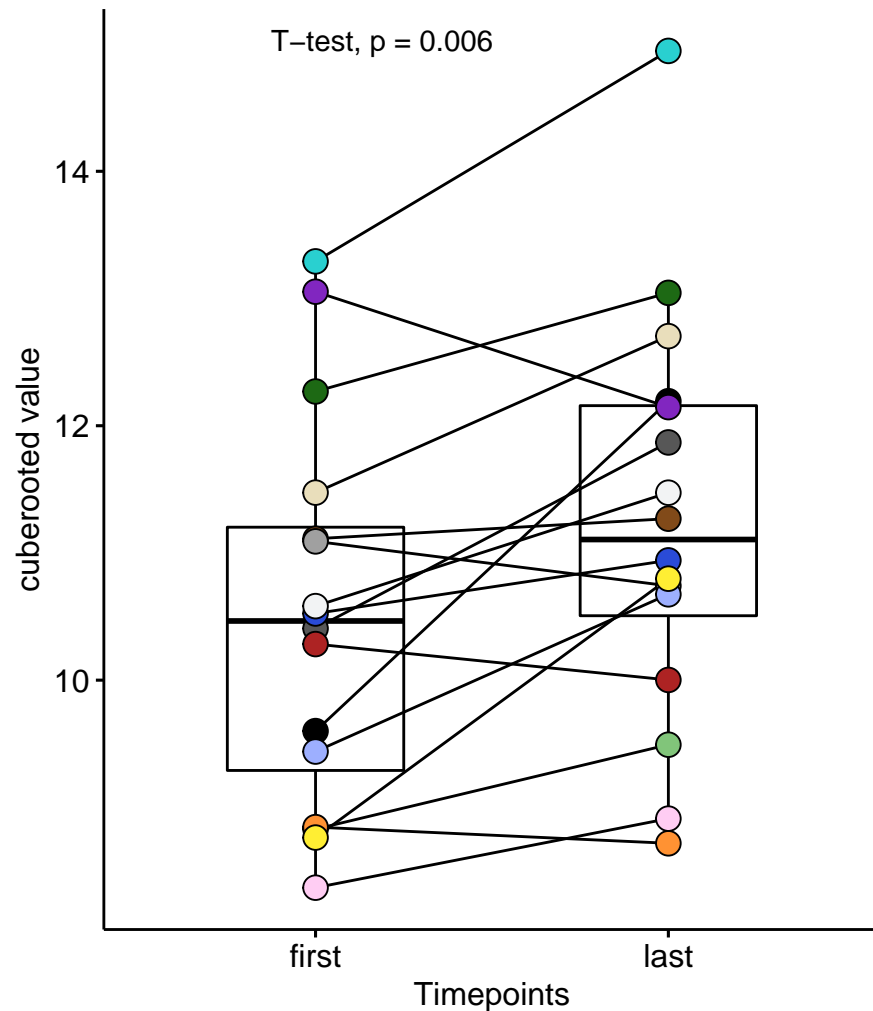

CD163

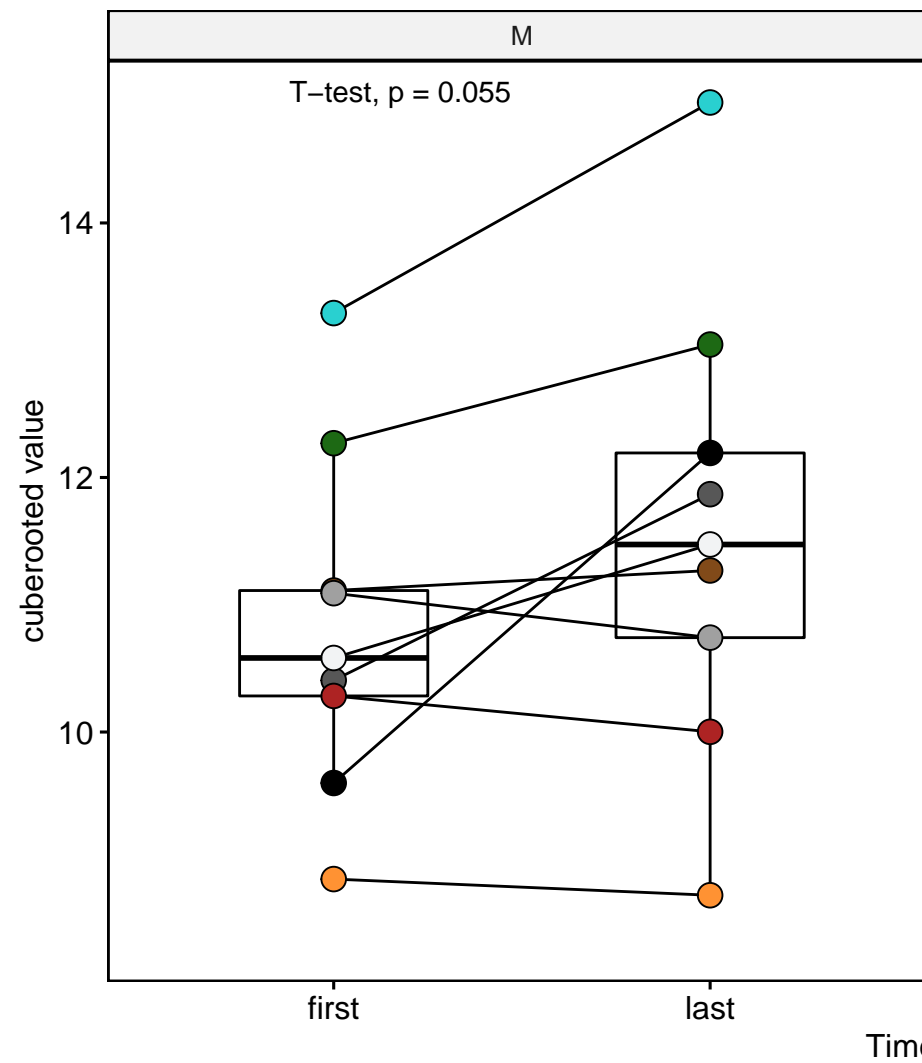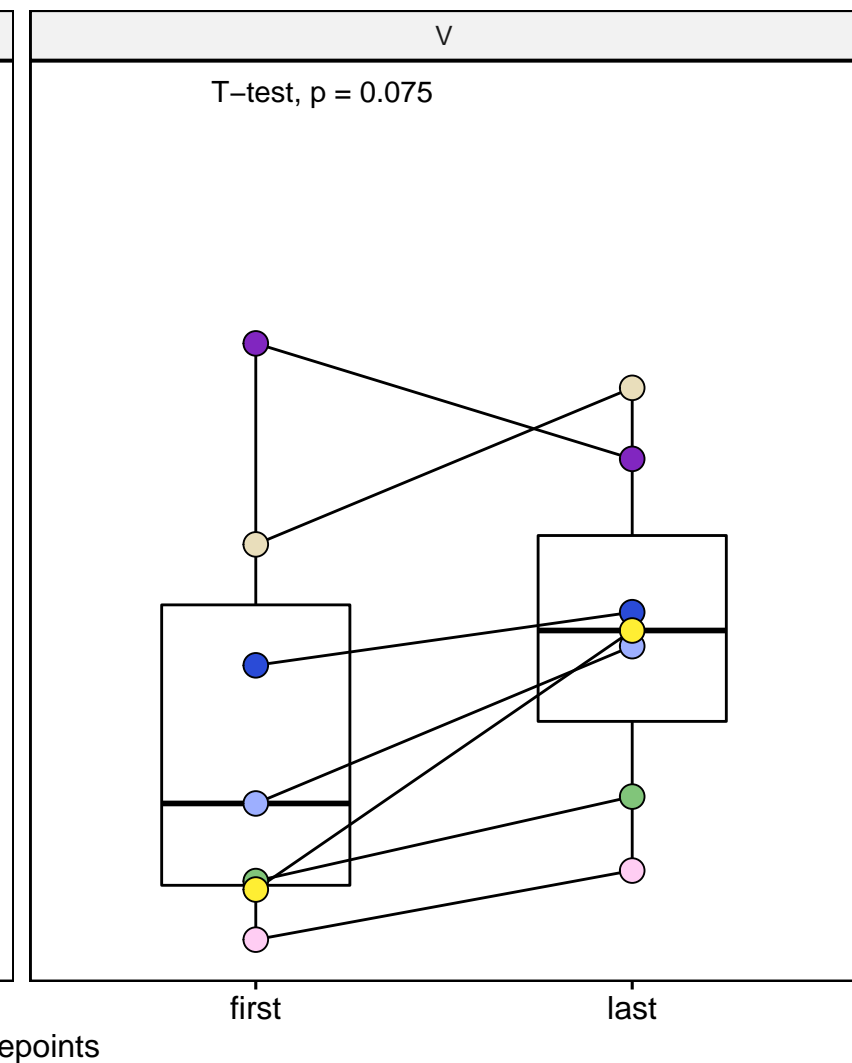

all patients (M+V)

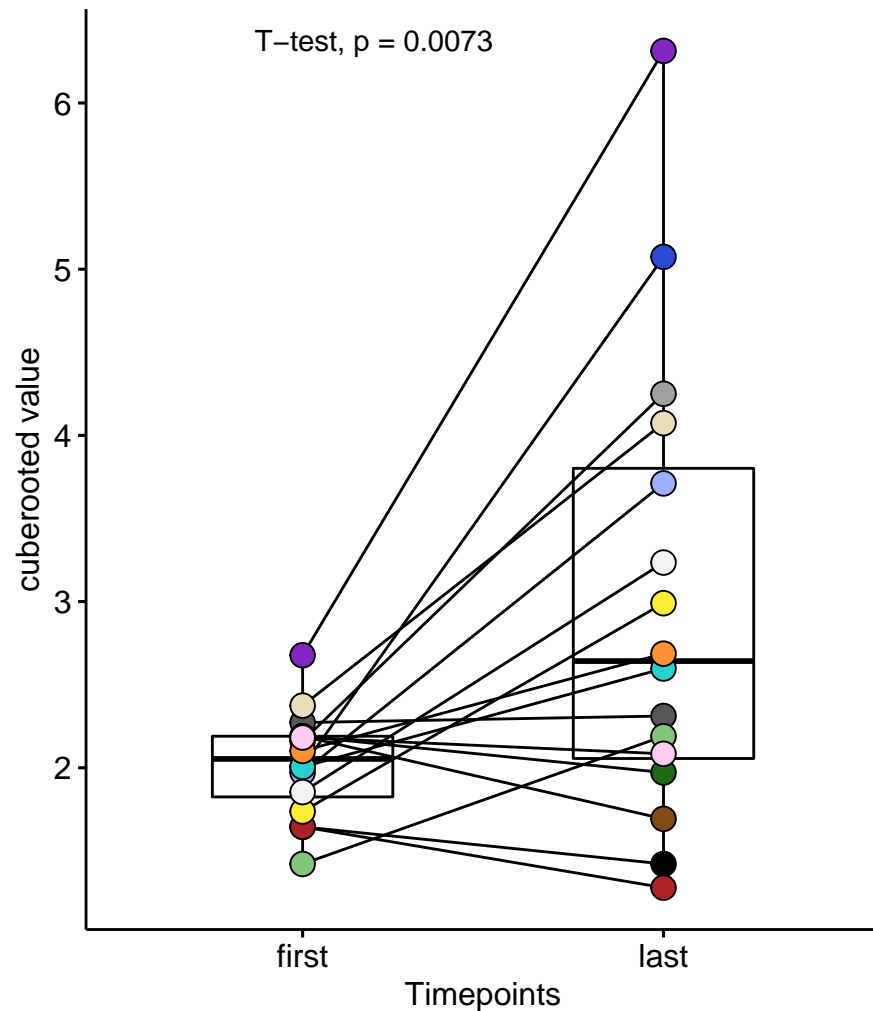

IL8

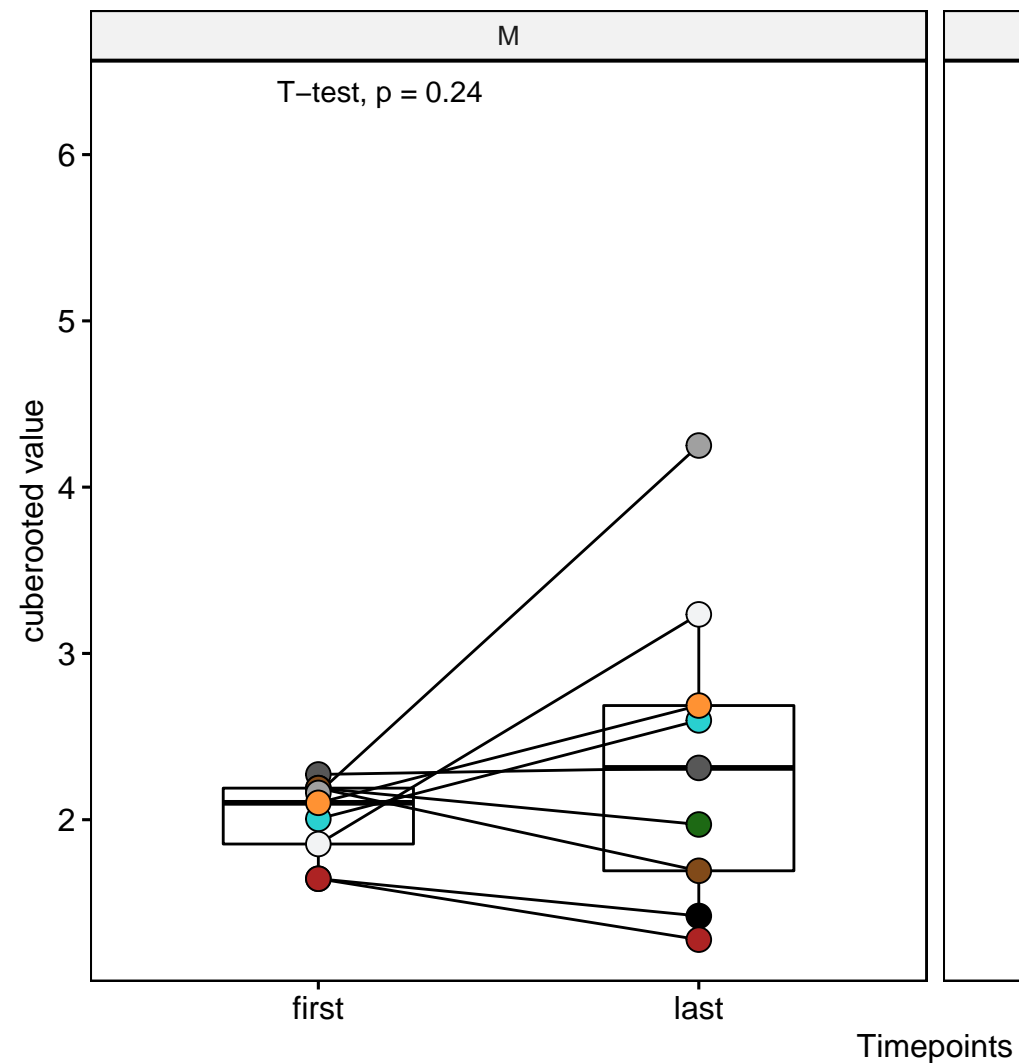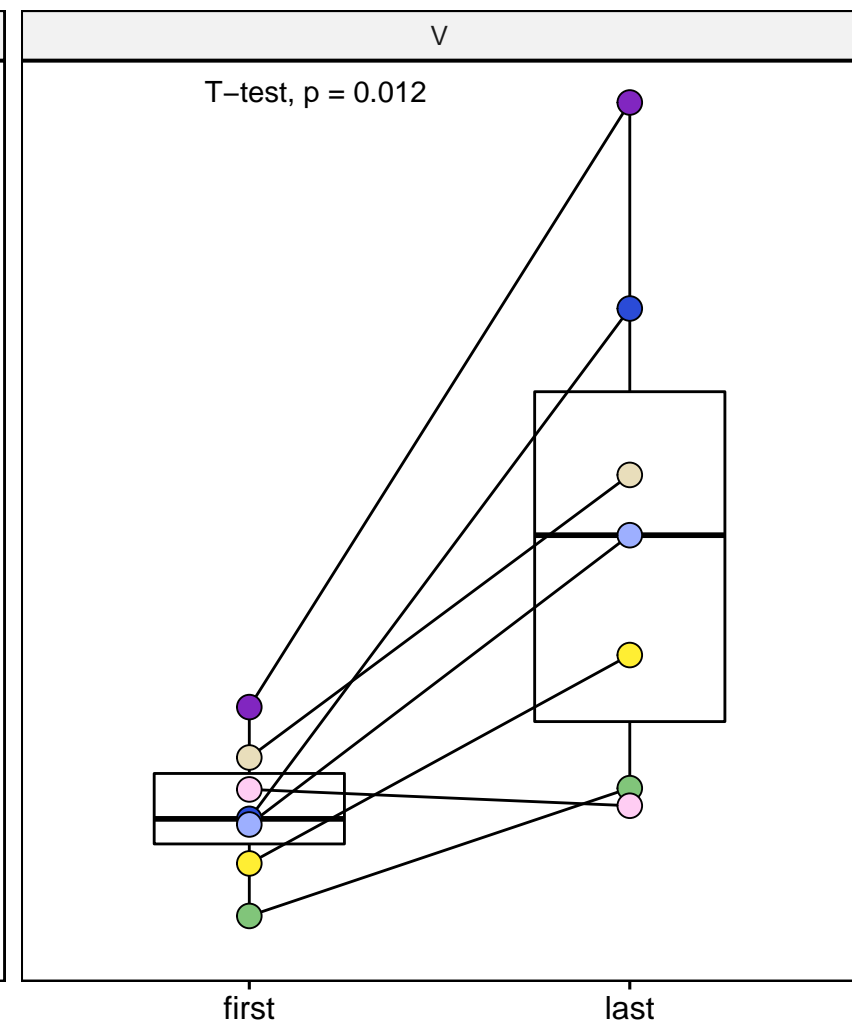

# Citrulline\_amines

all patients (M+V)

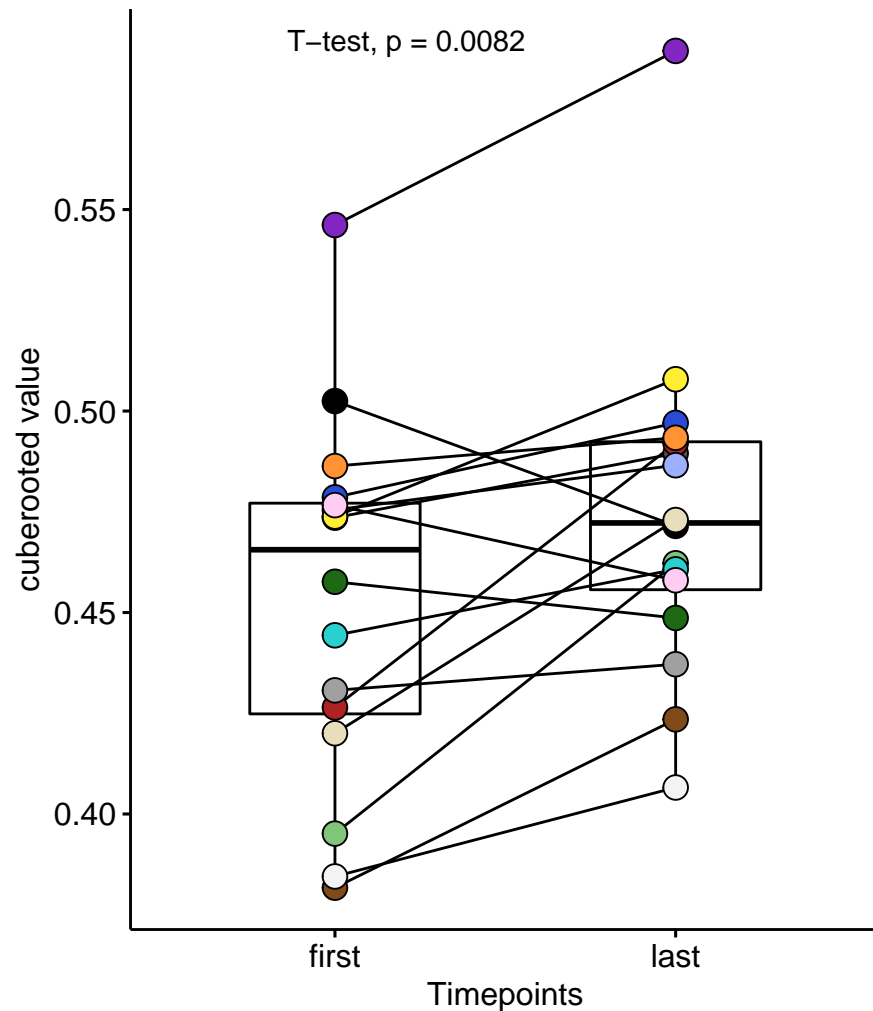

T-test,  $p = 0.14$

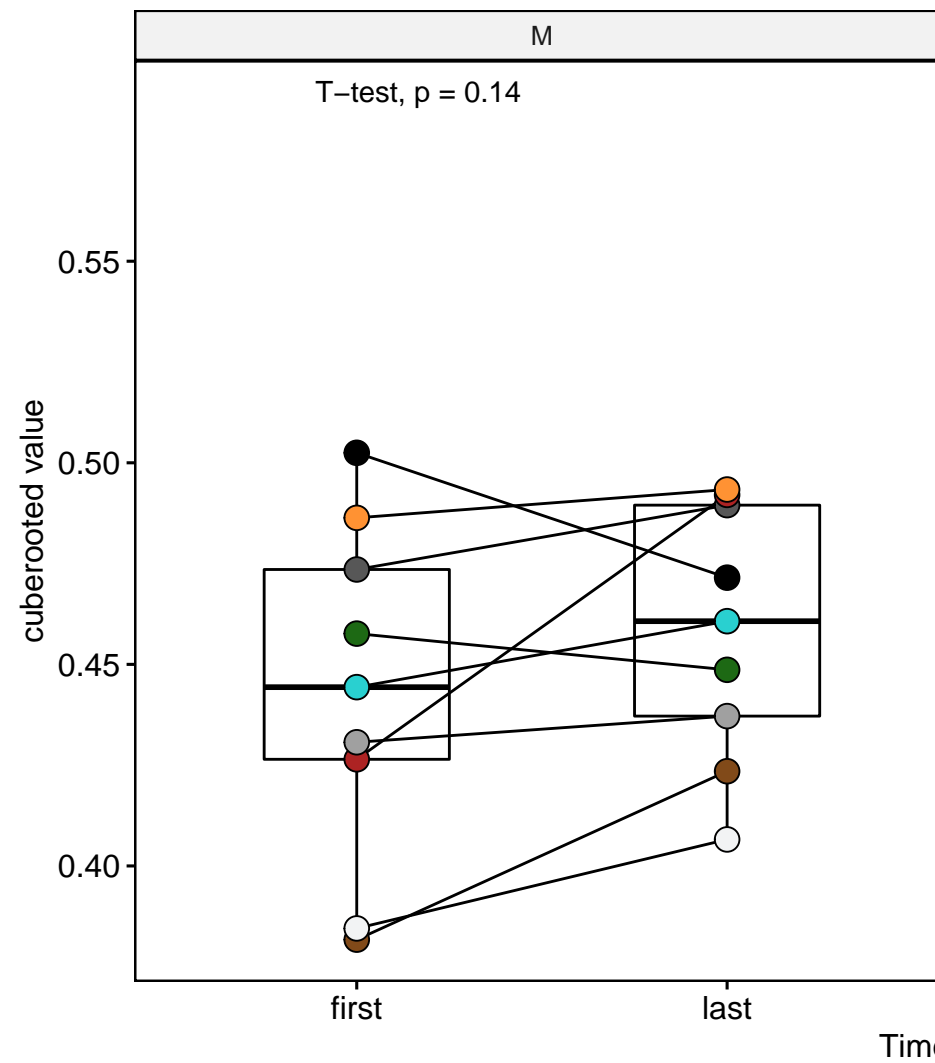

T-test,  $p = 0.034$

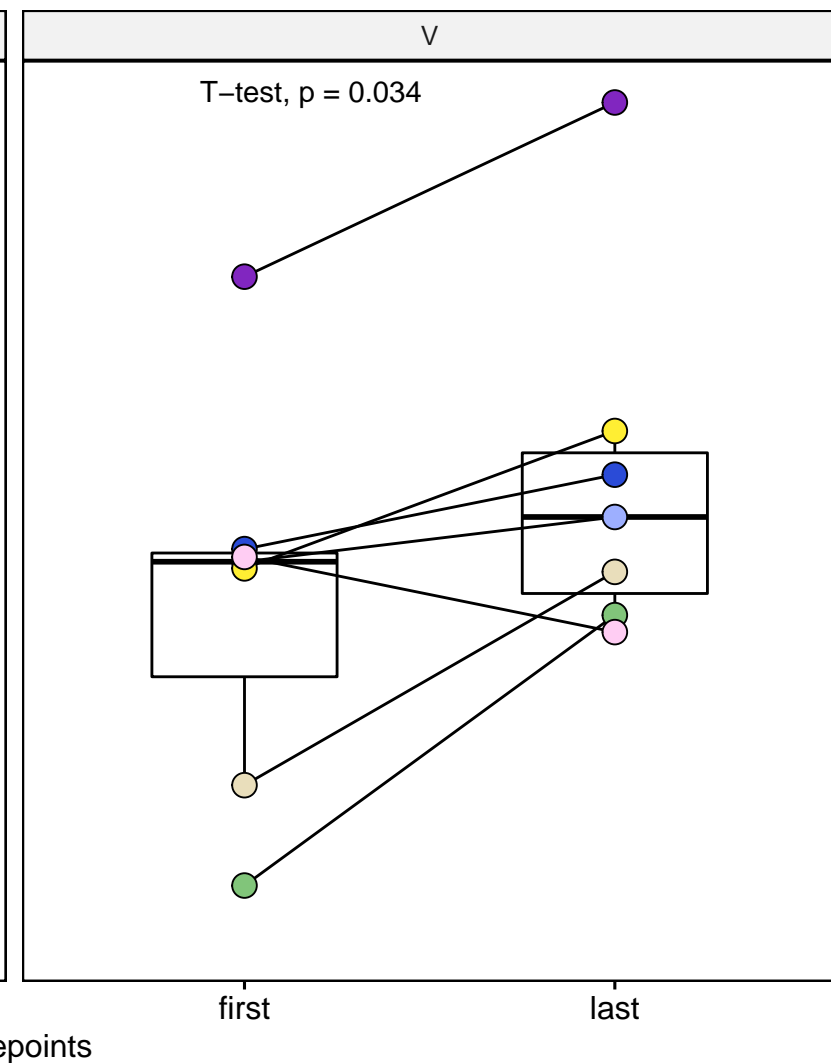

all patients (M+V)

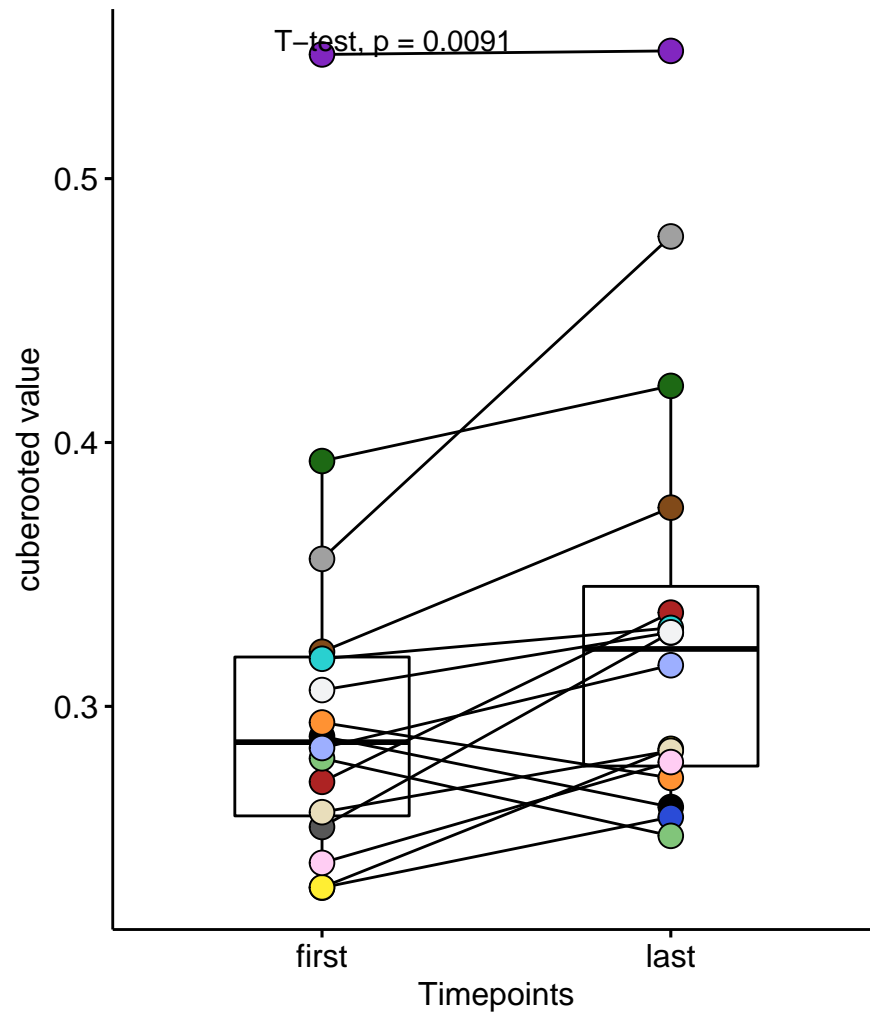

PatID

|              |               |              |              |
|--------------|---------------|--------------|--------------|
| 11_V68_8days | 18_V52_11days | 27_M71_4days | 40_V69_4days |
| 12_V73_7days | 21_V53_9days  | 28_V53_6days | 41_M70_6days |
| 13_M74_4days | 22_M65_3days  | 30_M49_5days | 44_M57_5days |
| 15_M71_7days | 25_M87_3days  | 32_V69_3days | 6d_M79_8days |

M

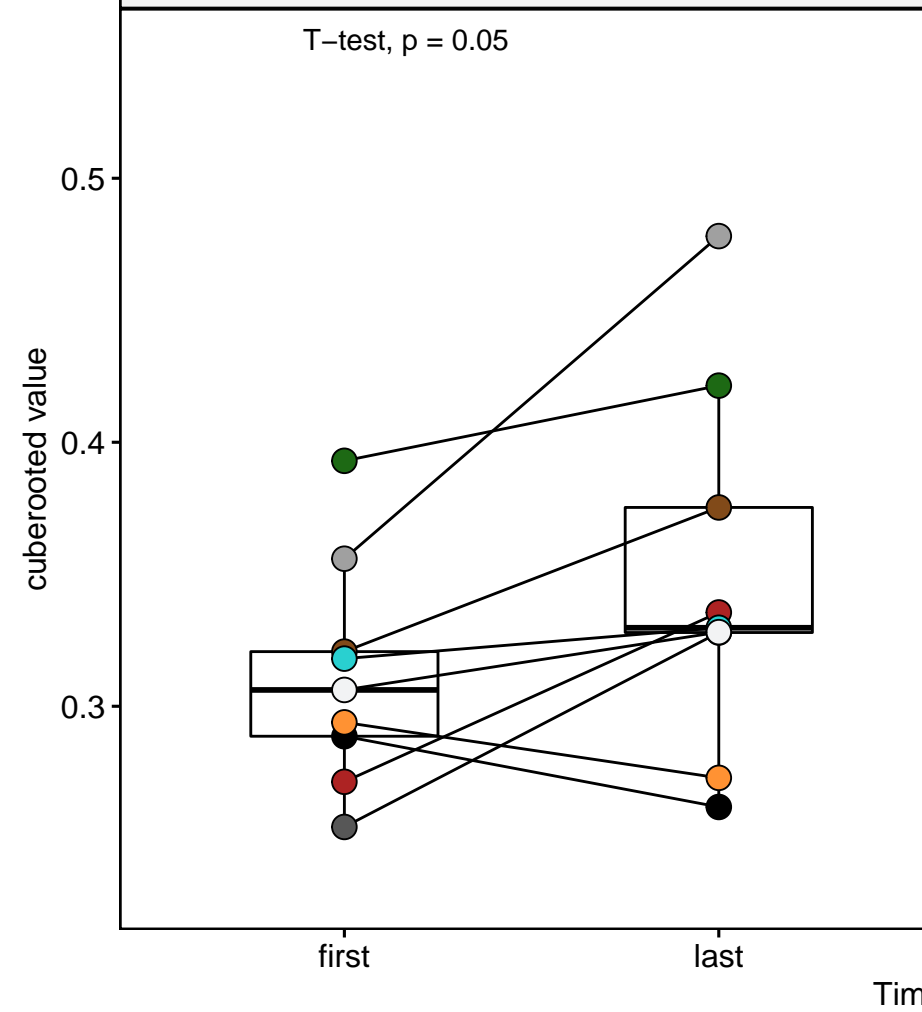

V

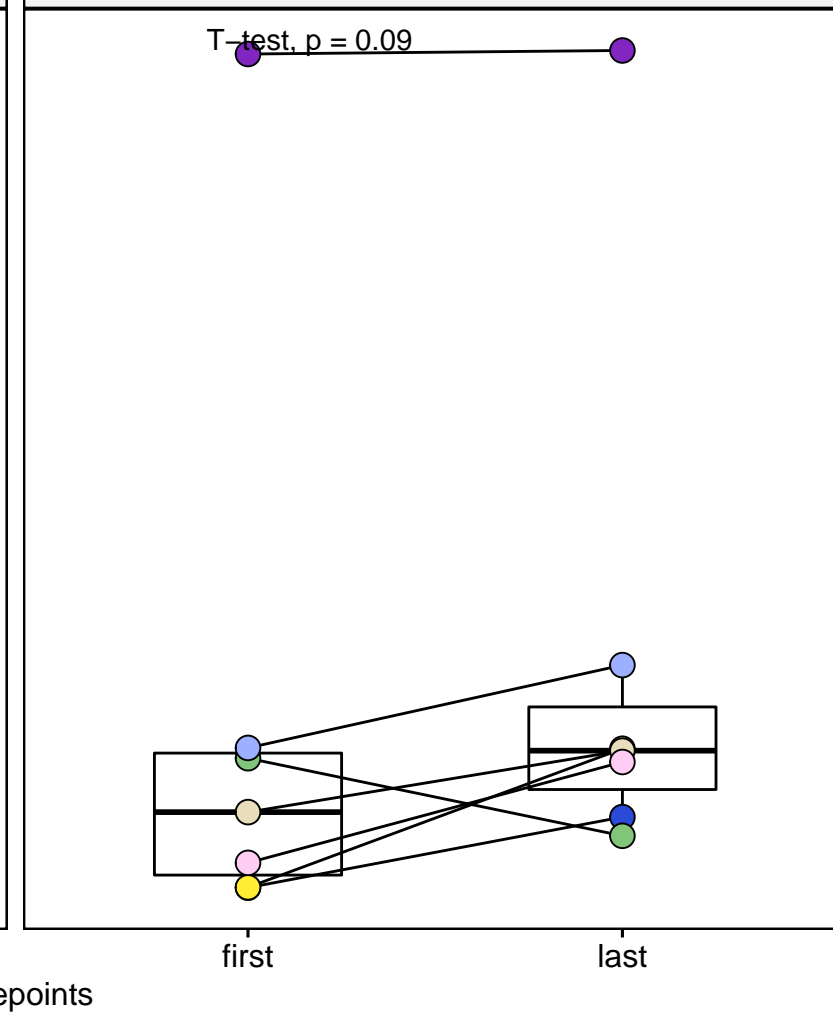



# CD4

all patients (M+V)

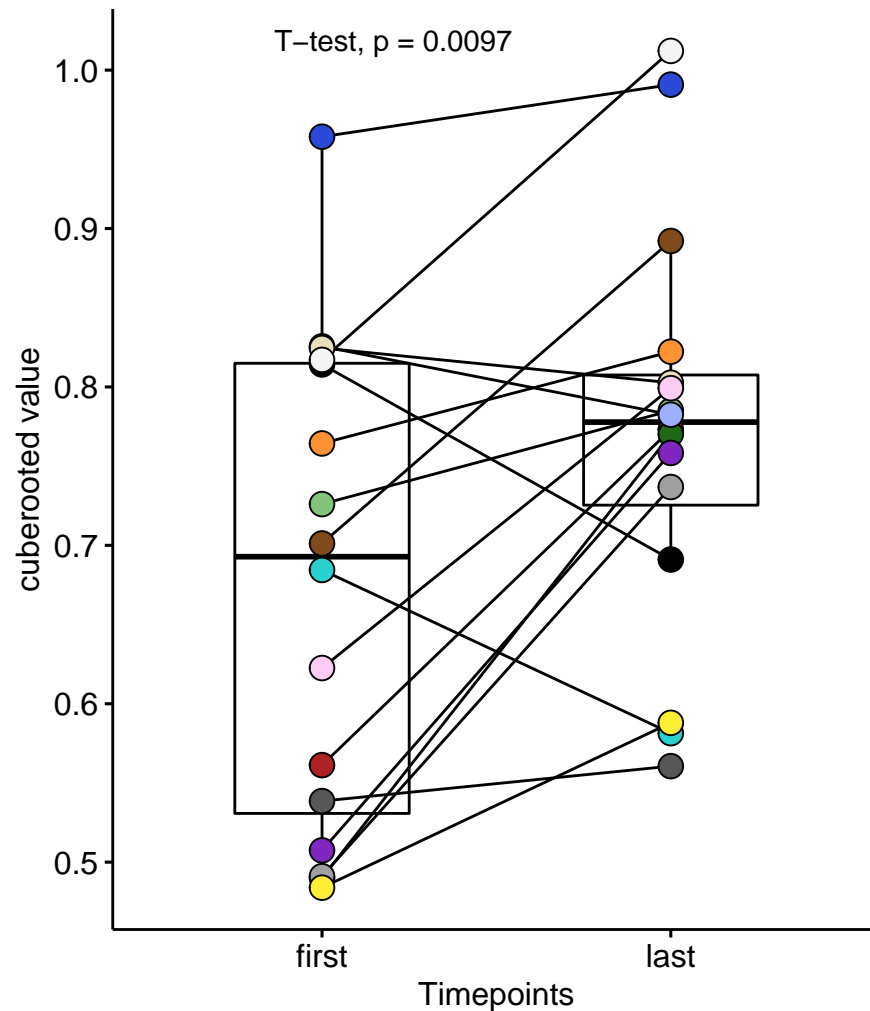

- PatID
- |              |               |              |              |
|--------------|---------------|--------------|--------------|
| 11_V68_8days | 18_V52_11days | 27_M71_4days | 40_V69_4days |
| 12_V73_7days | 21_V53_9days  | 28_V53_6days | 41_M70_6days |
| 13_M74_4days | 22_M65_3days  | 30_M49_5days | 44_M57_5days |
| 15_M71_7days | 25_M87_3days  | 32_V69_3days | 6d_M79_8days |

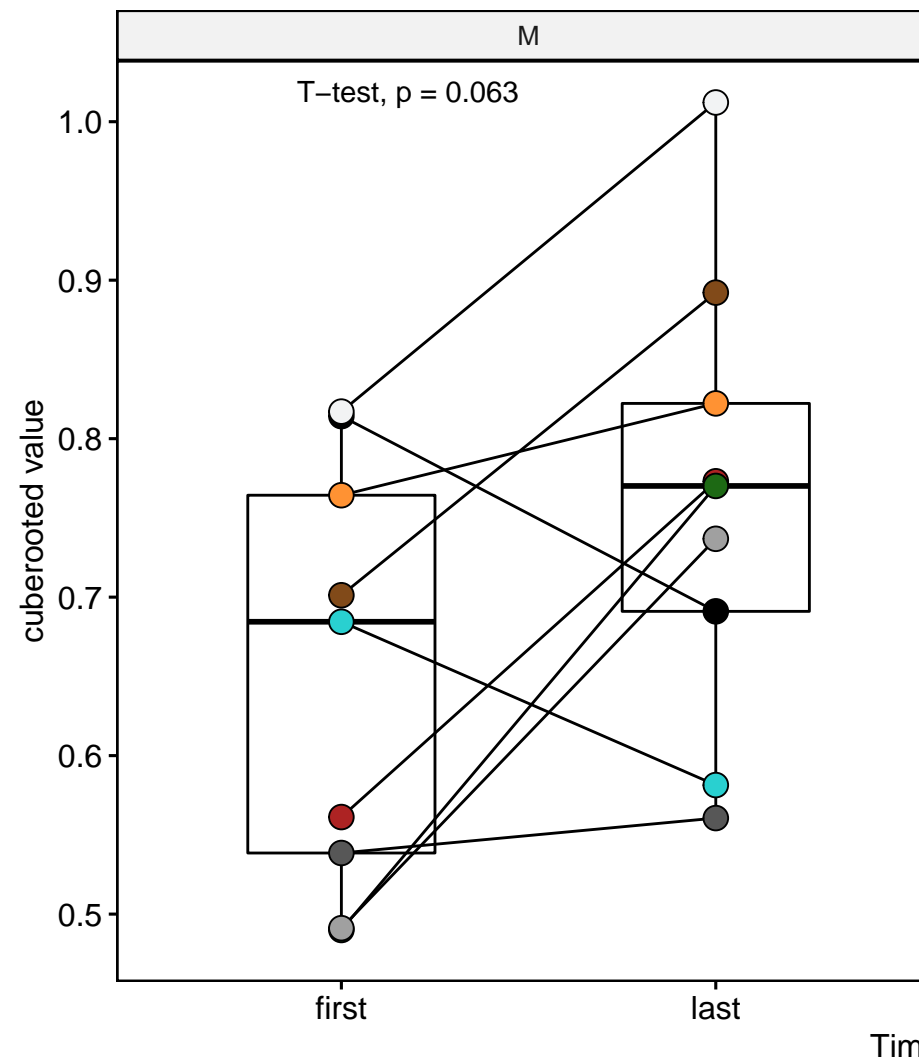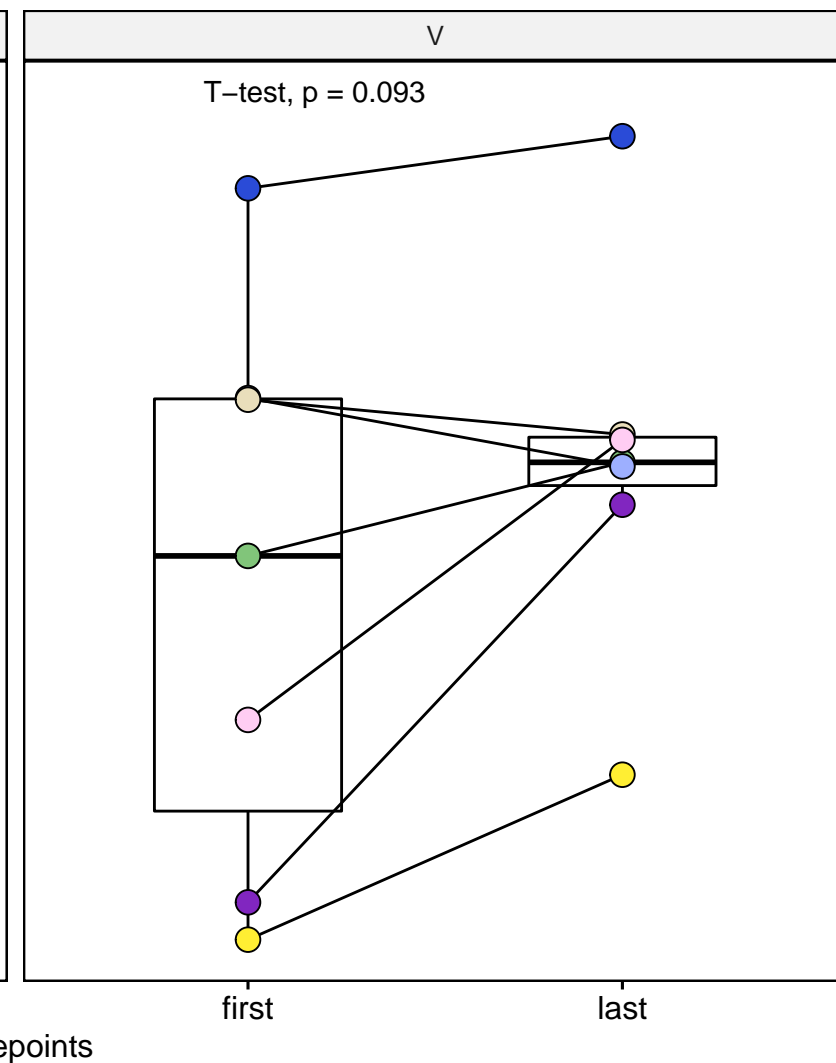

# Homocitrulline\_amines

all patients (M+V)

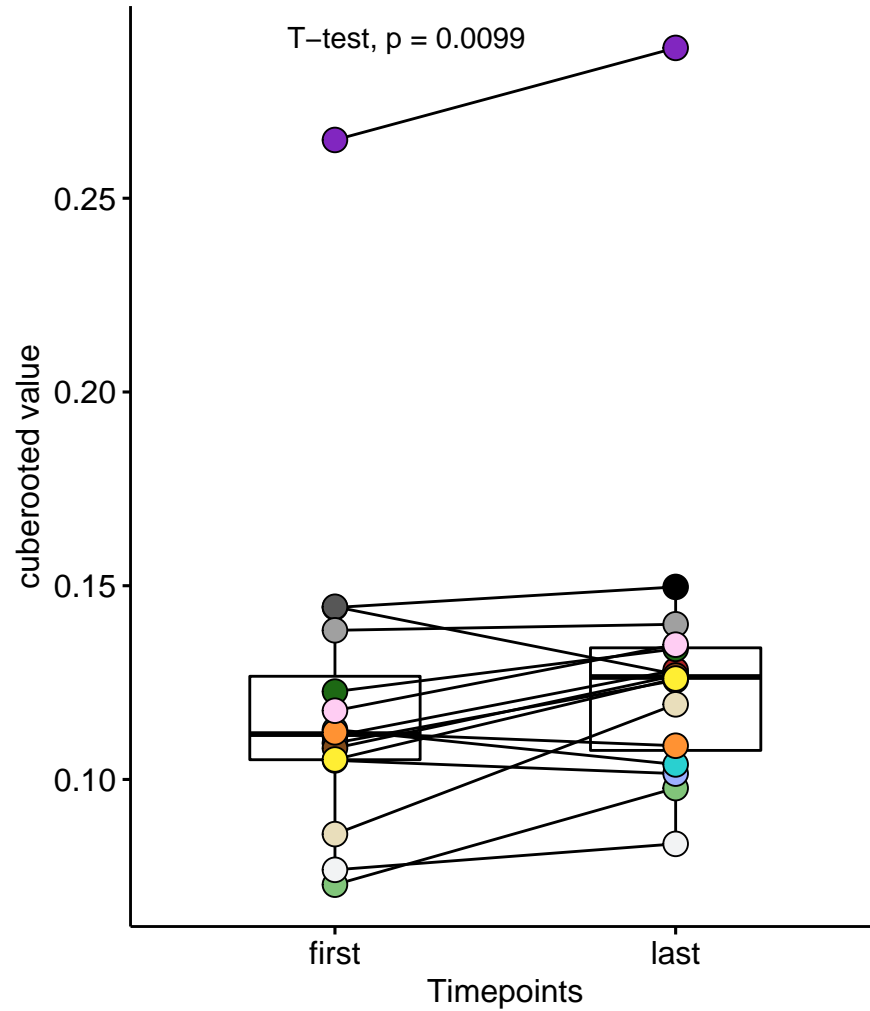

- PatID
- |              |               |              |              |
|--------------|---------------|--------------|--------------|
| 11_V68_8days | 18_V52_11days | 27_M71_4days | 40_V69_4days |
| 12_V73_7days | 21_V53_9days  | 28_V53_6days | 41_M70_6days |
| 13_M74_4days | 22_M65_3days  | 30_M49_5days | 44_M57_5days |
| 15_M71_7days | 25_M87_3days  | 32_V69_3days | 6d_M79_8days |

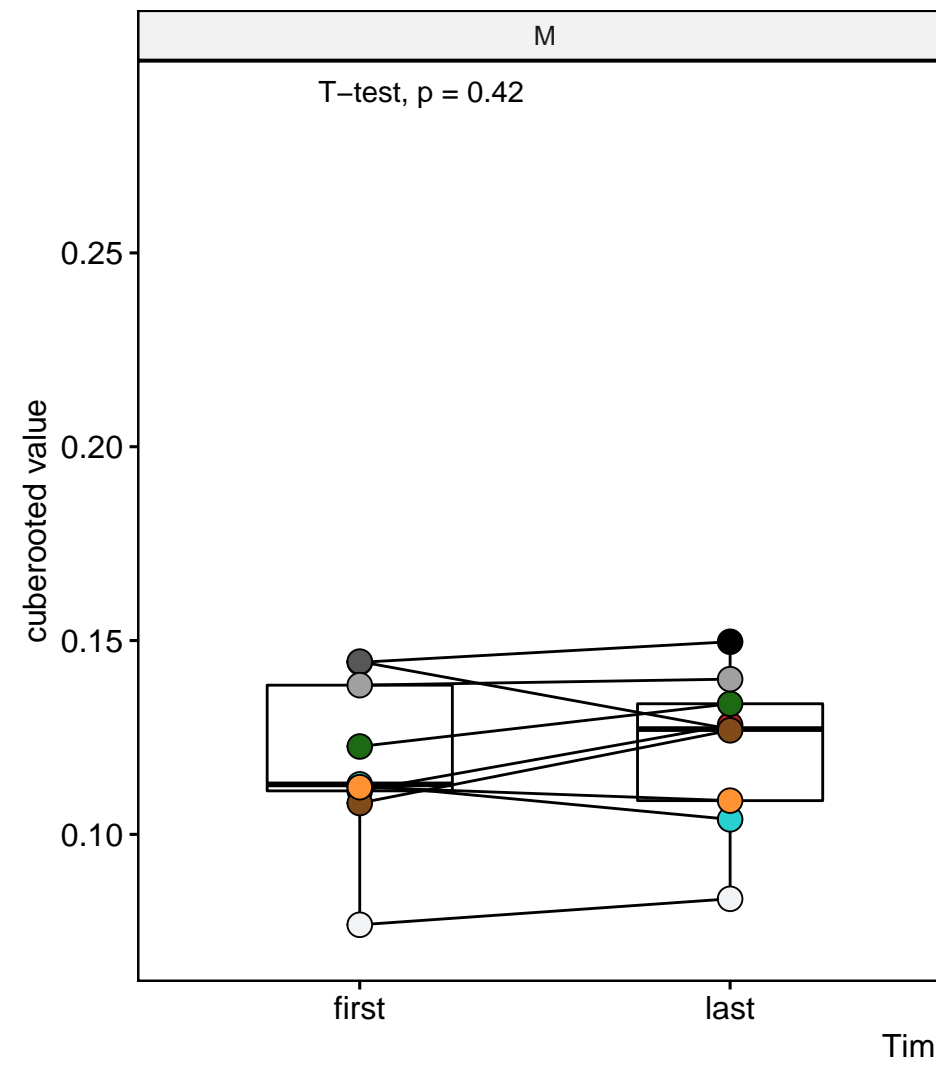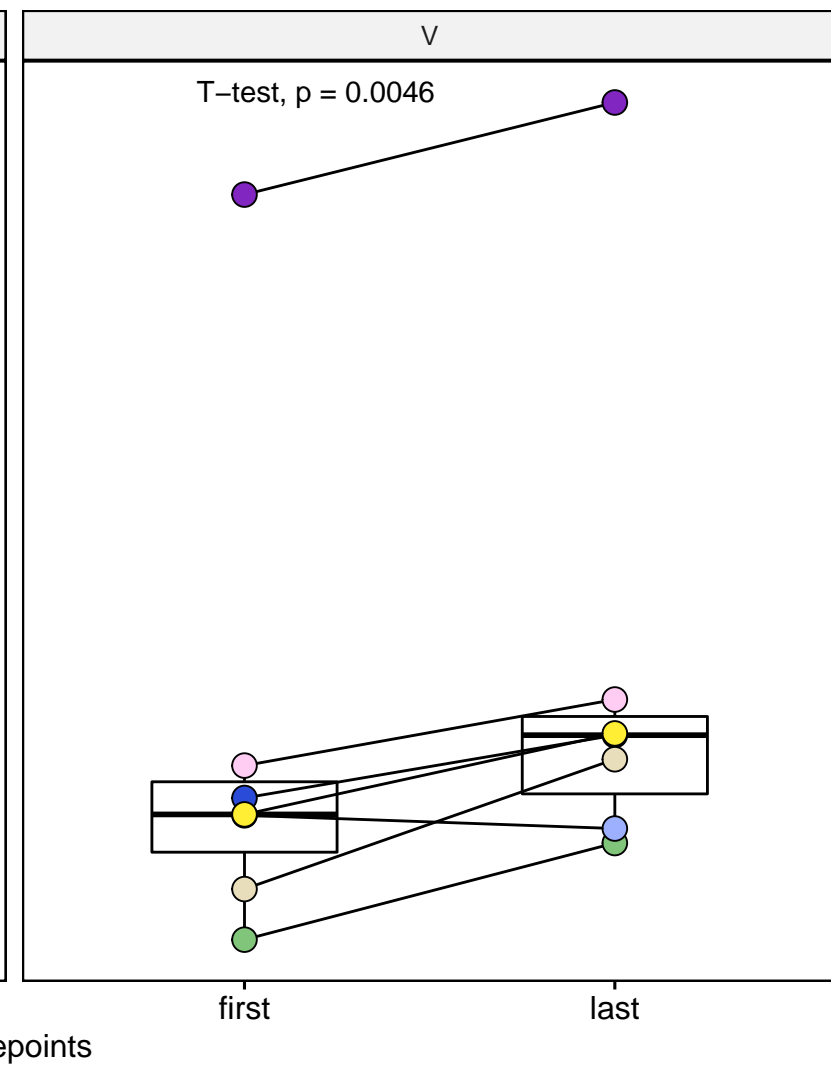

# Cysteine\_amines

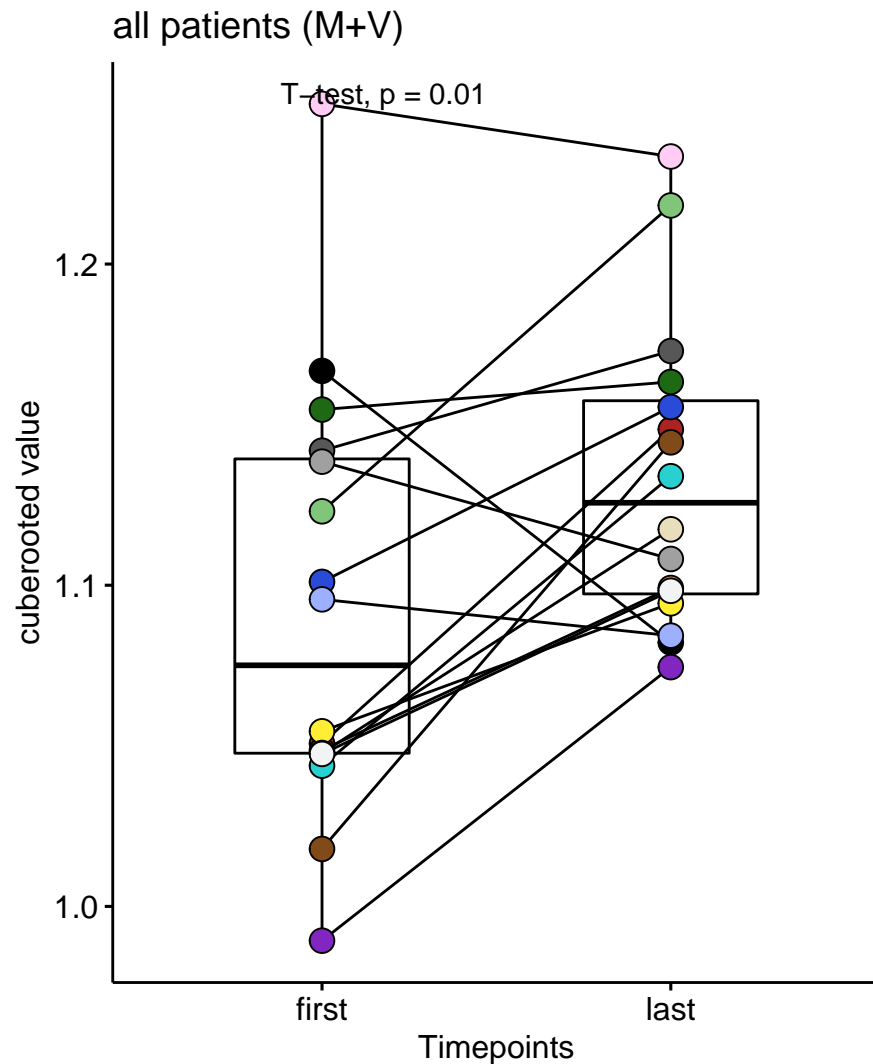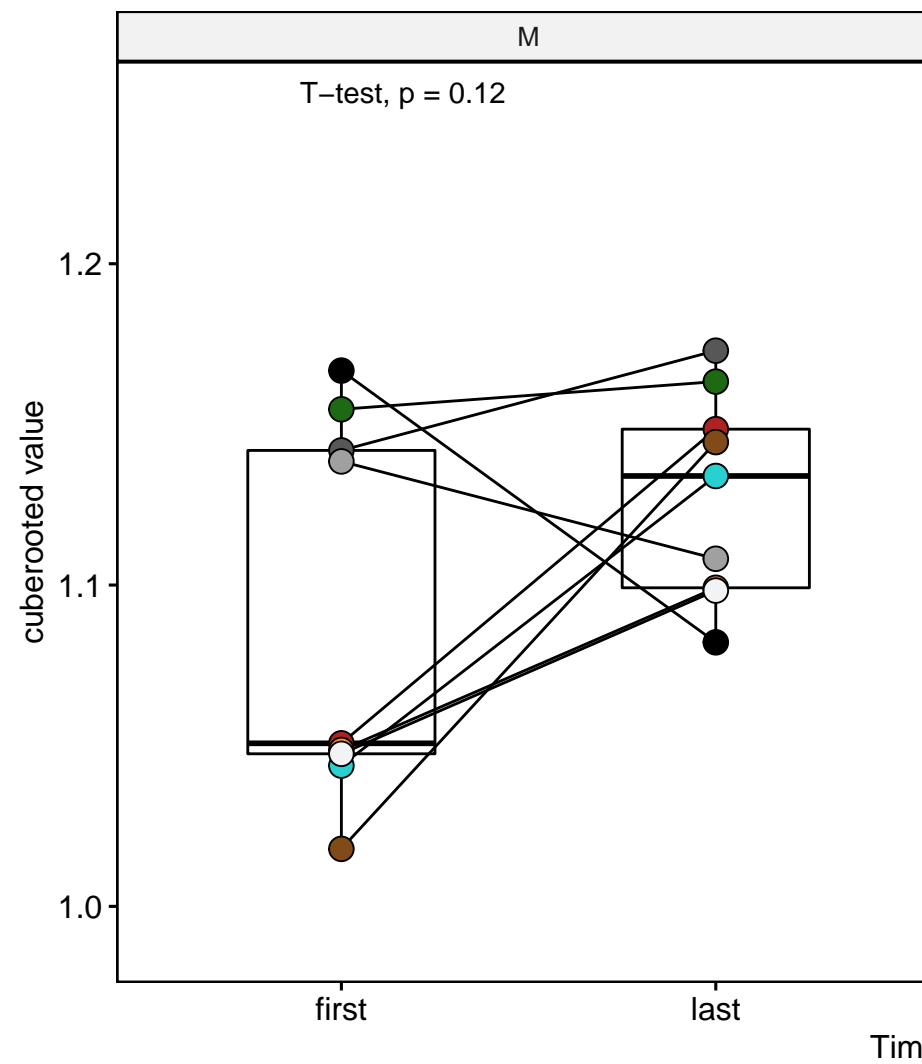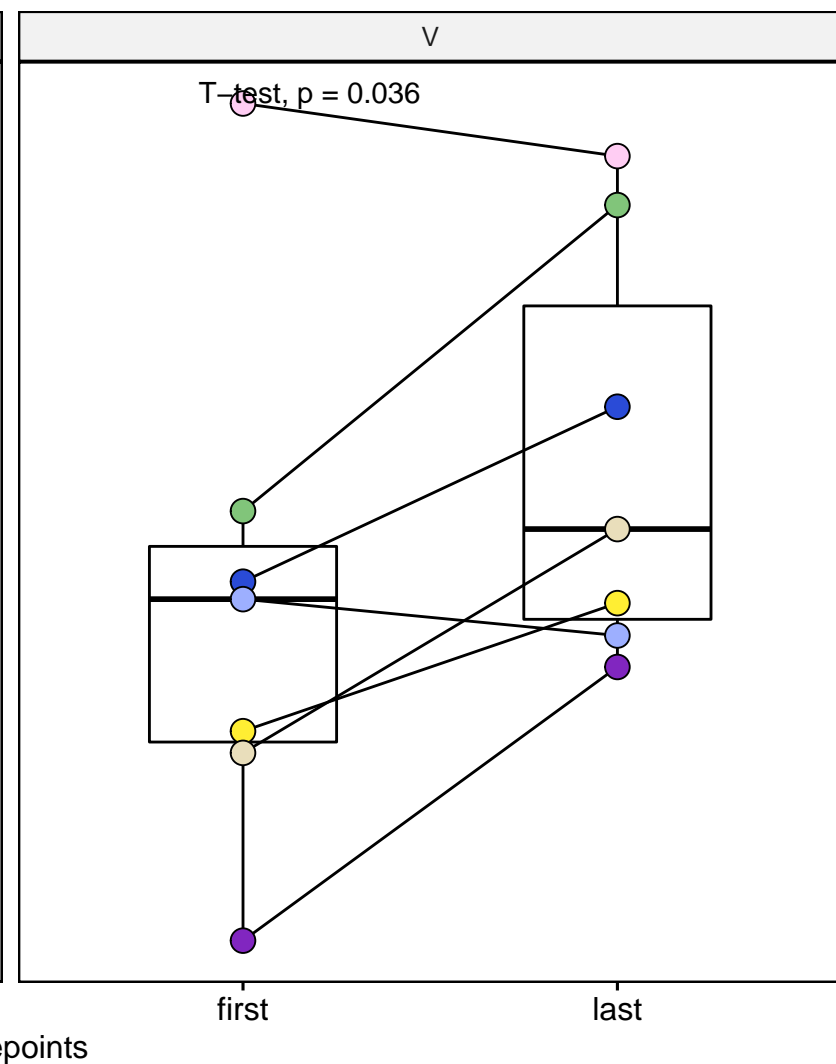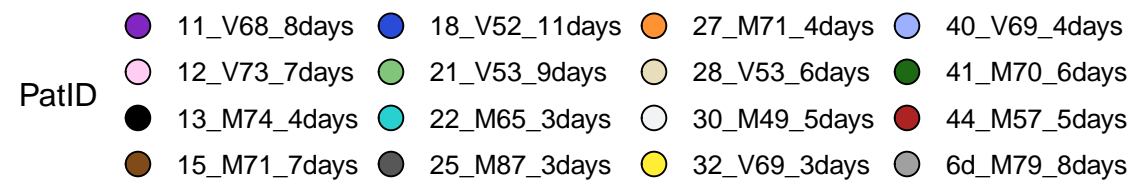

# CCL17

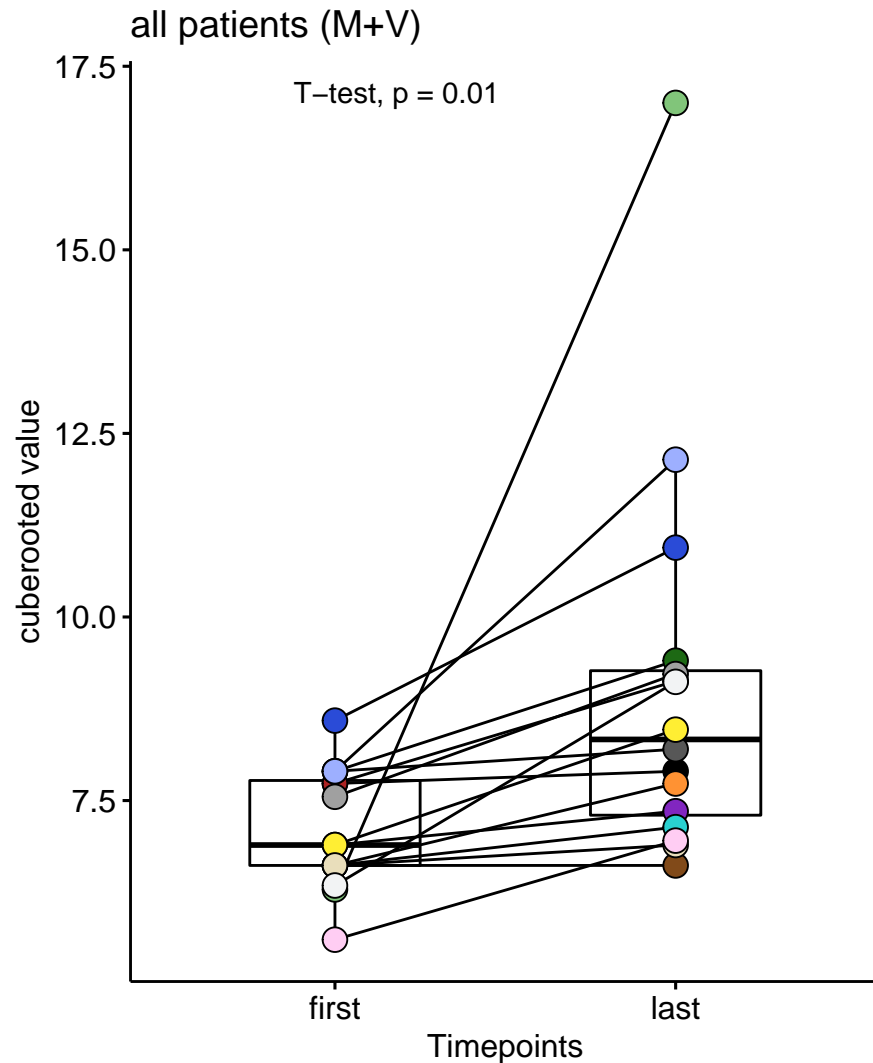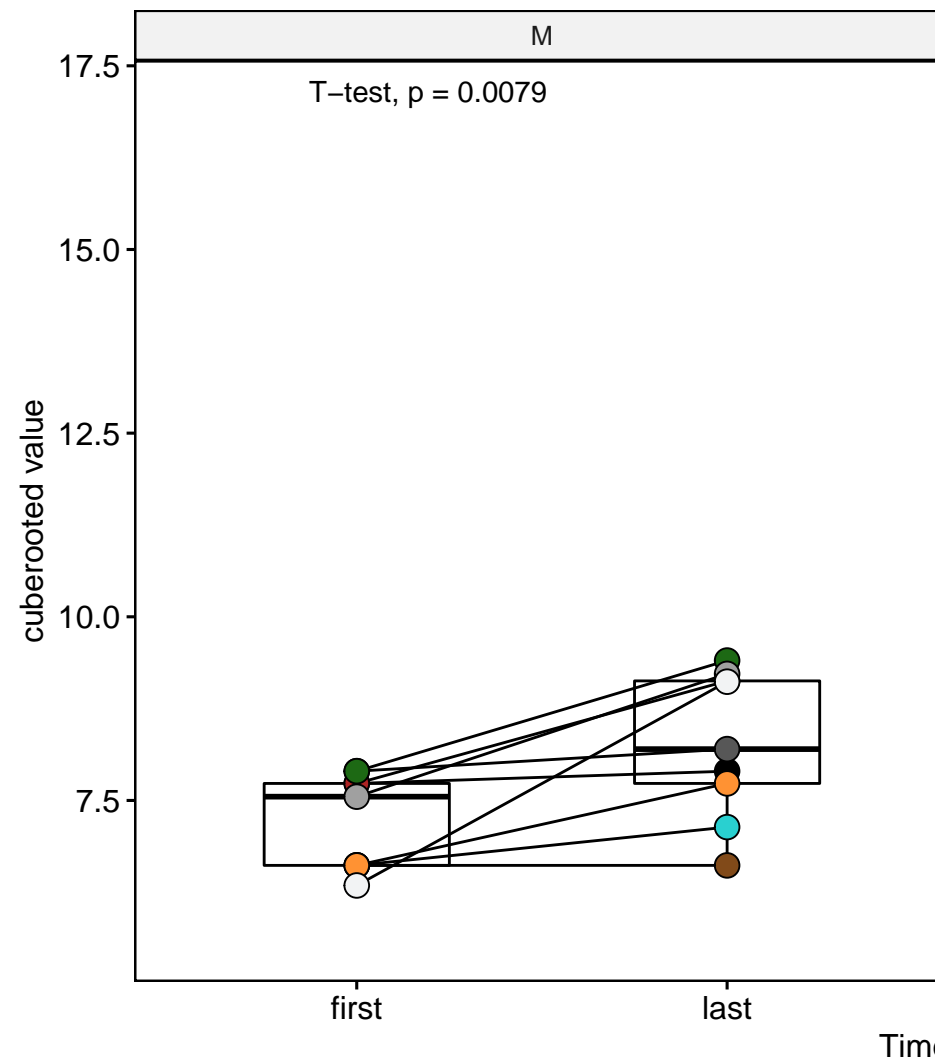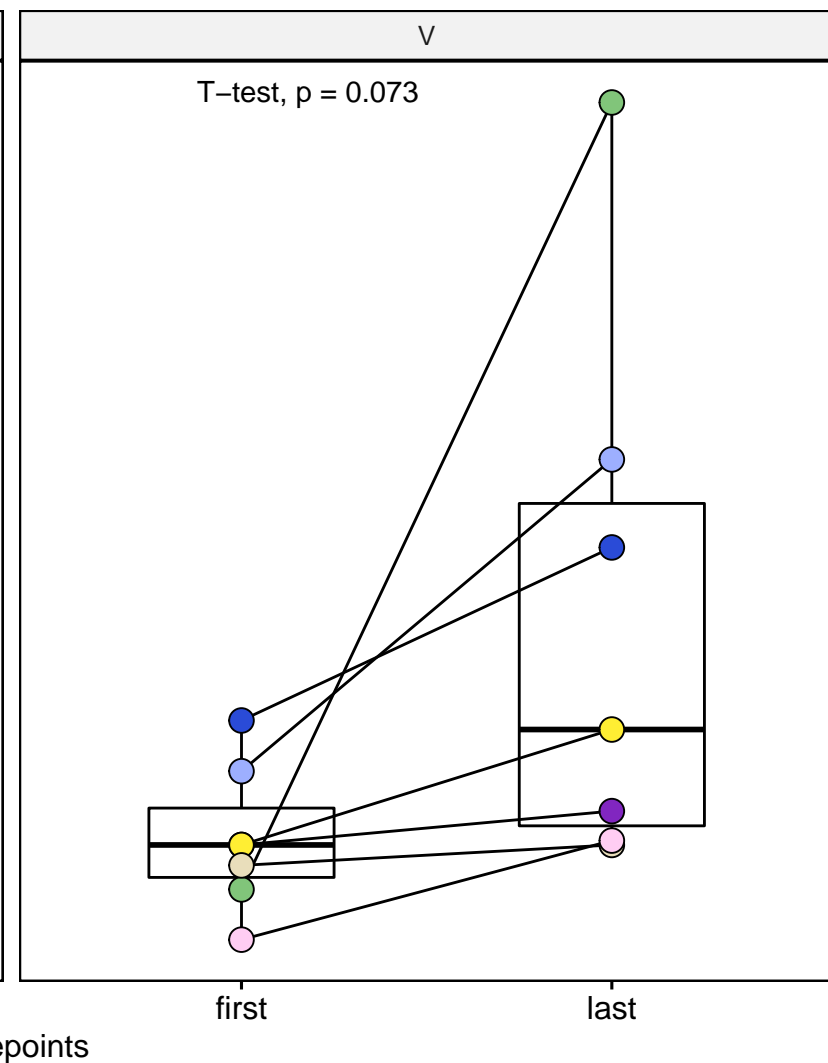

# T\_Cells

all patients (M+V)

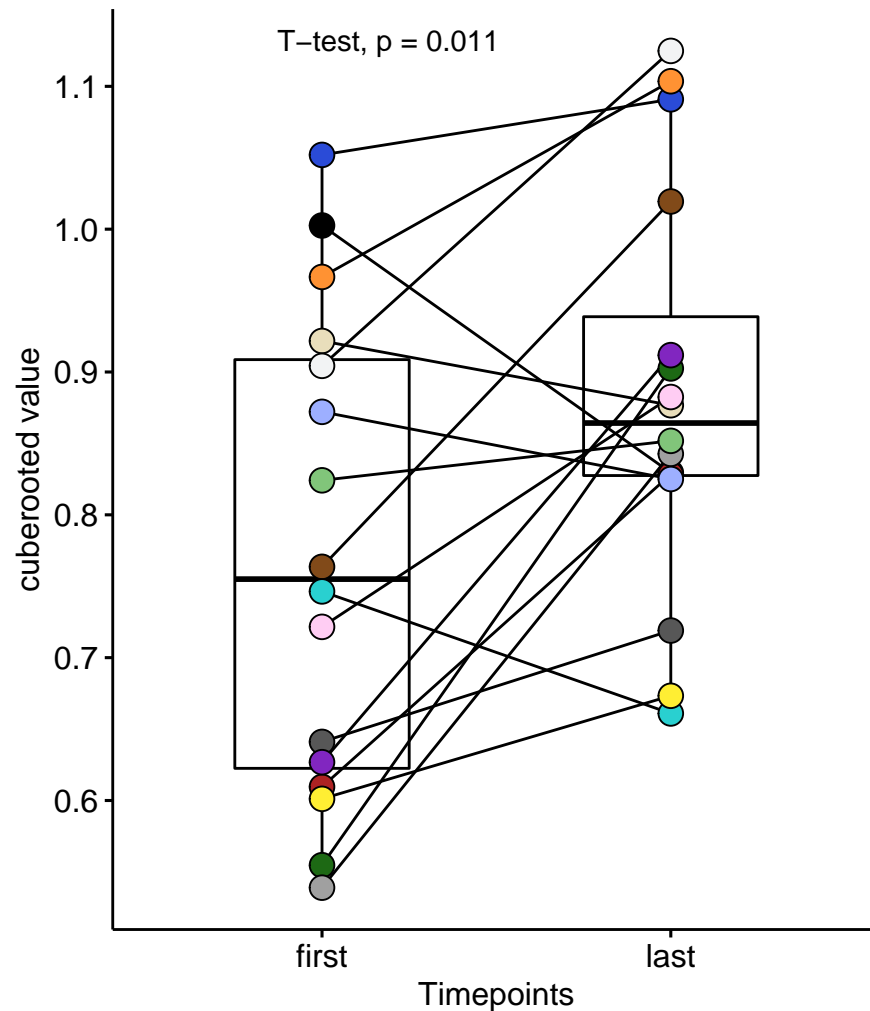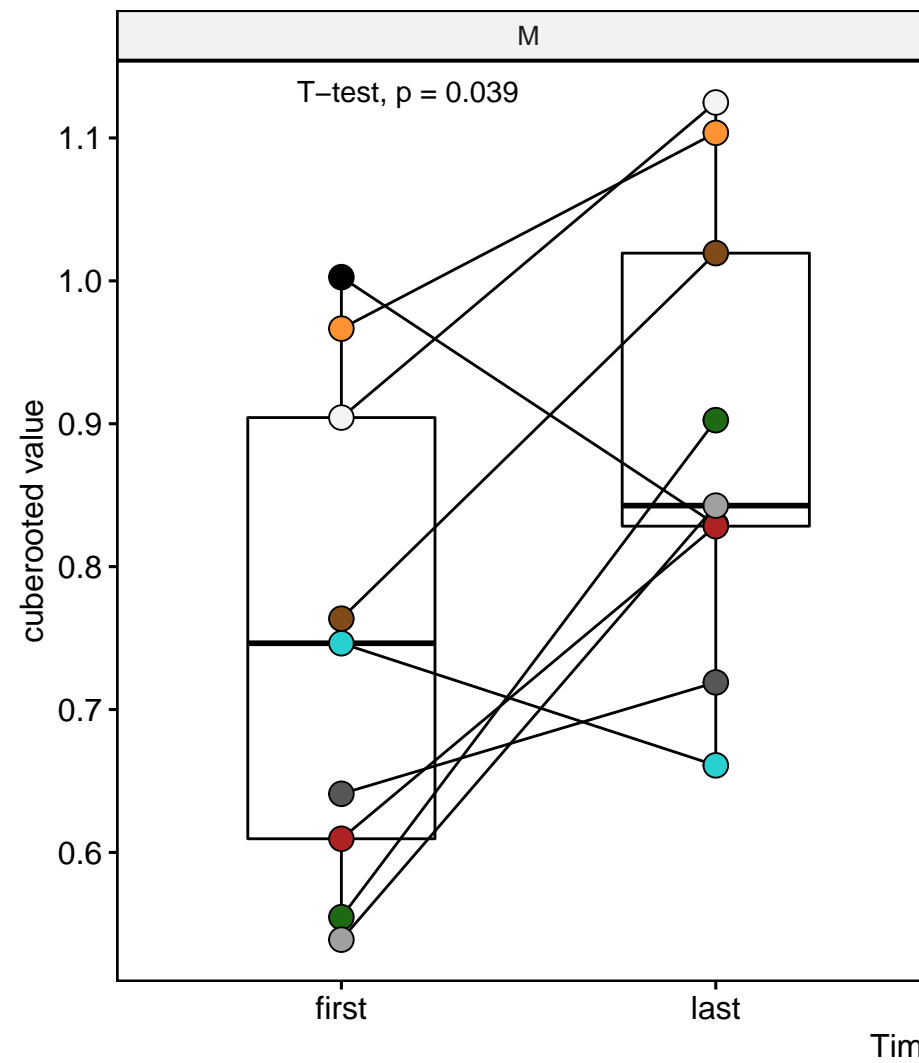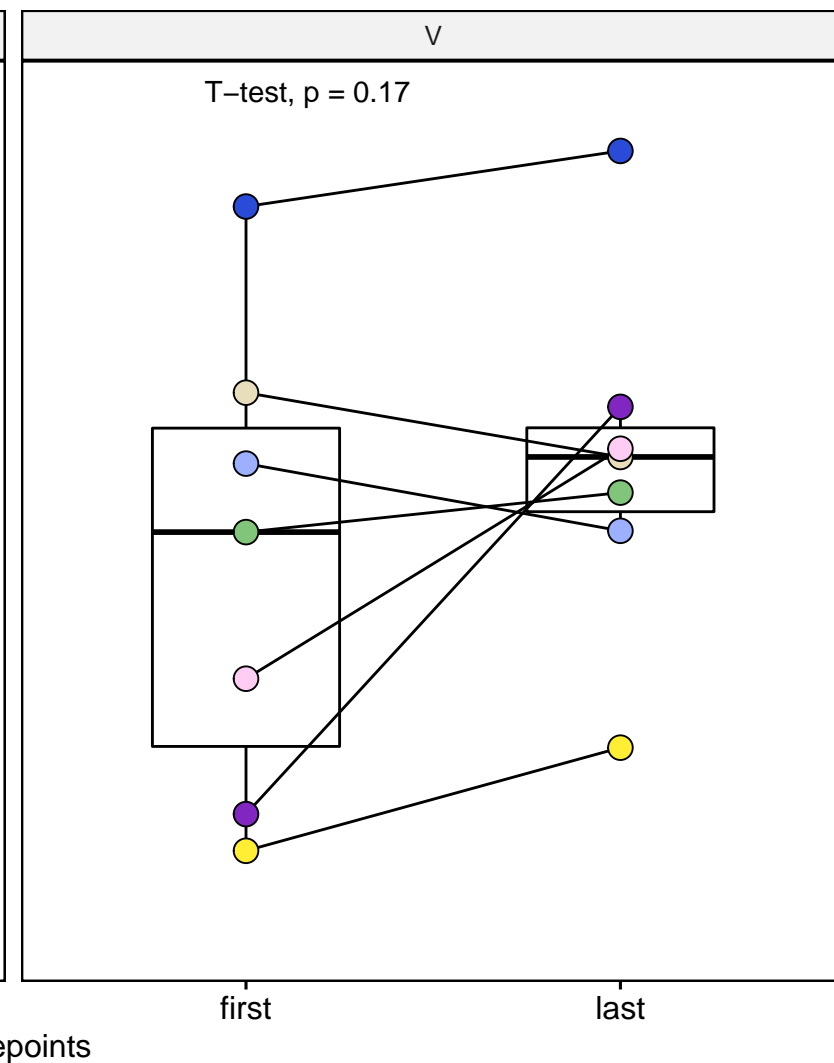

# Ethanolamine\_amines

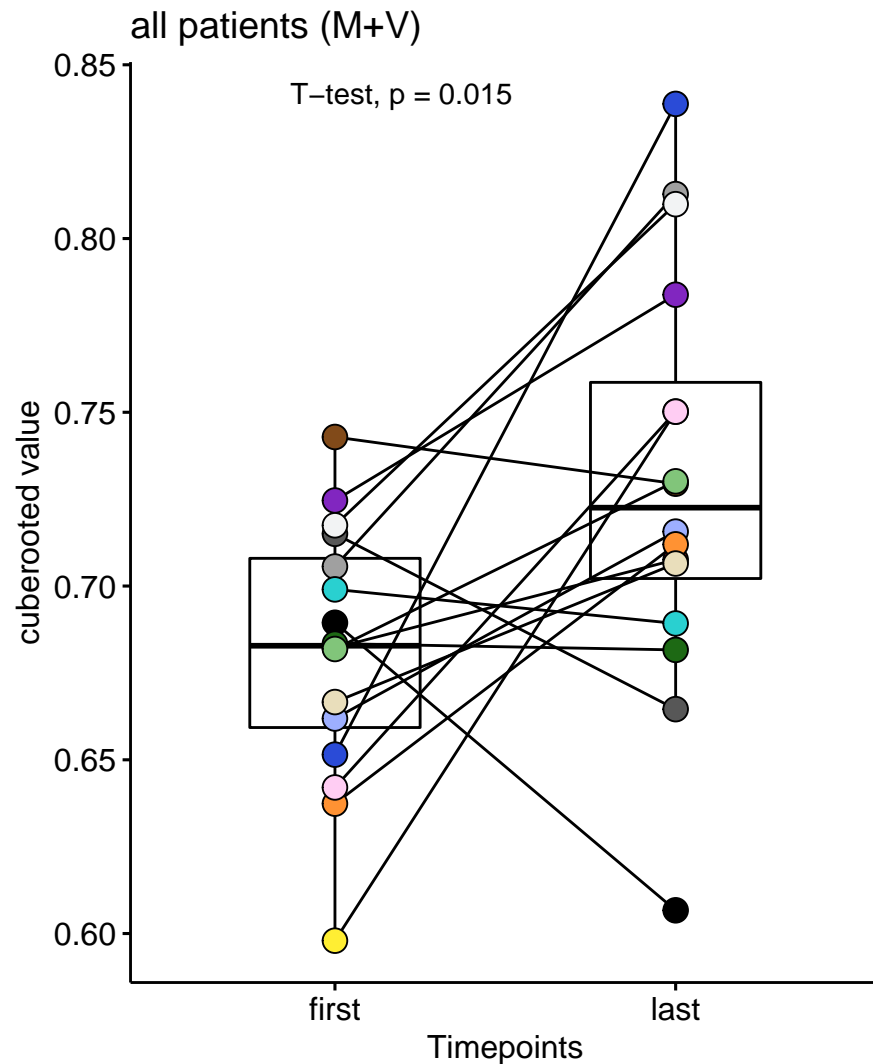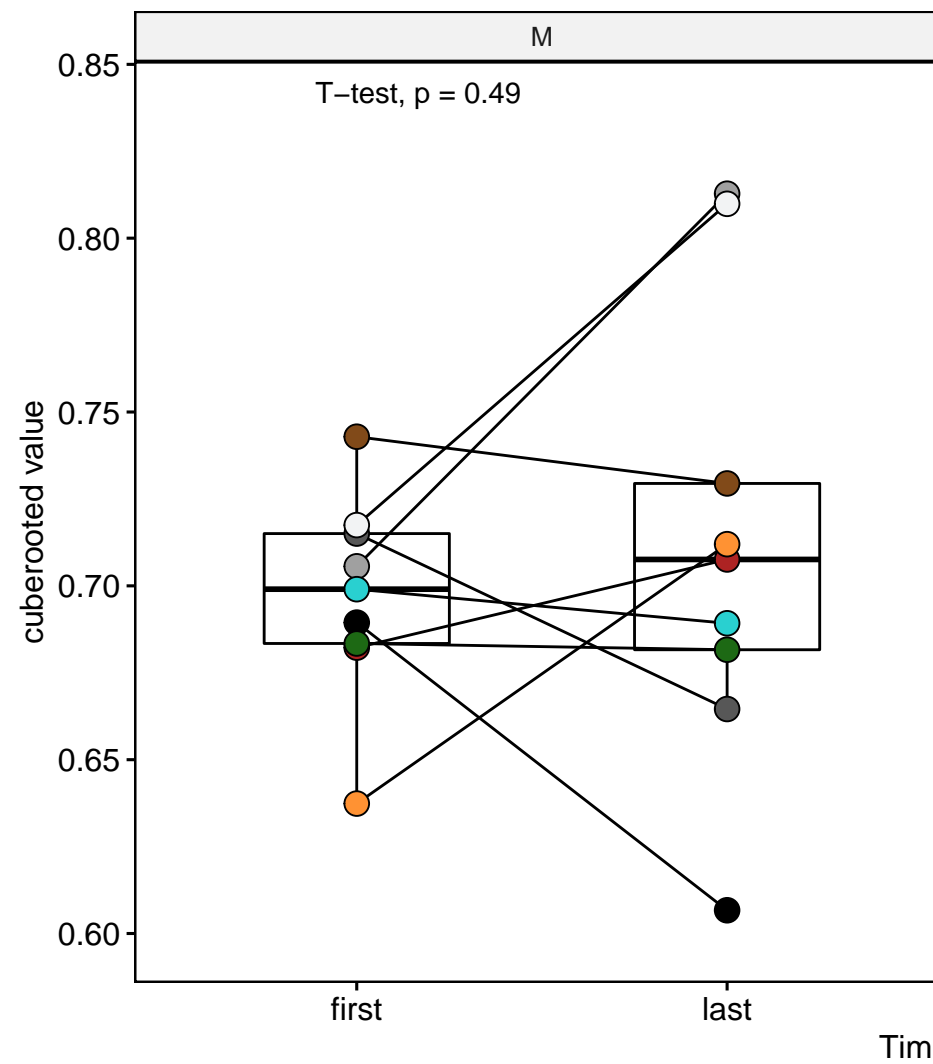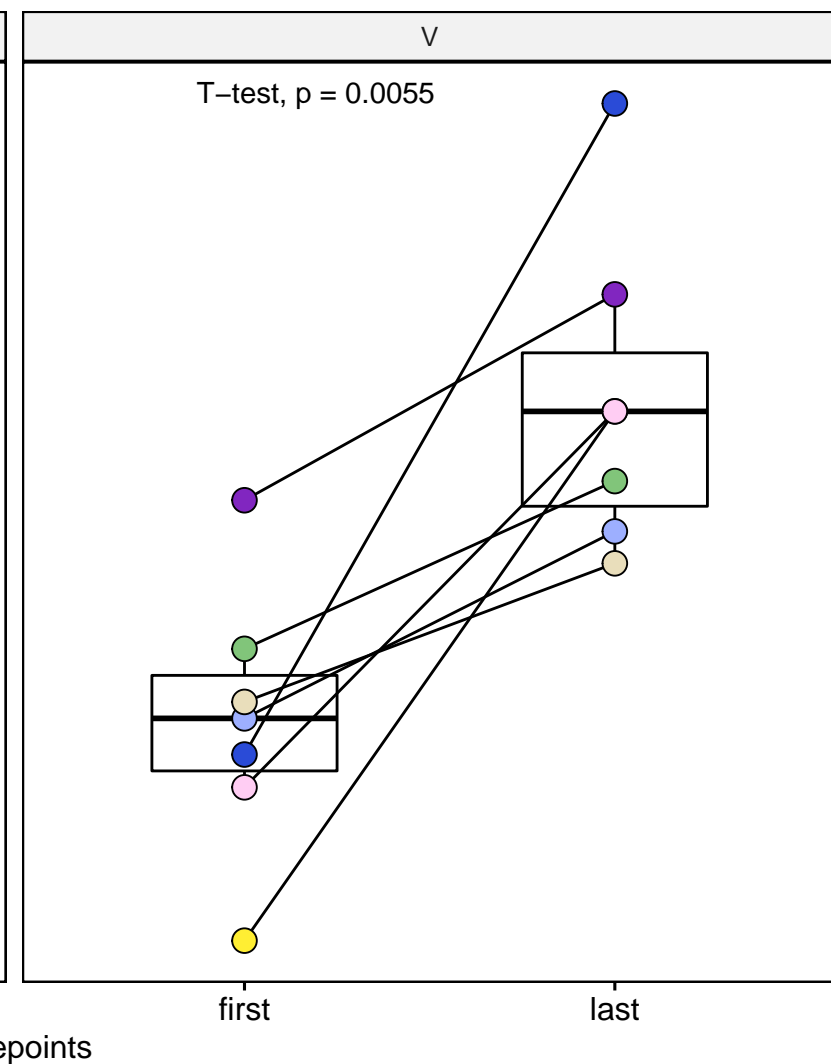

# Glycylglycine\_amines

all patients (M+V)

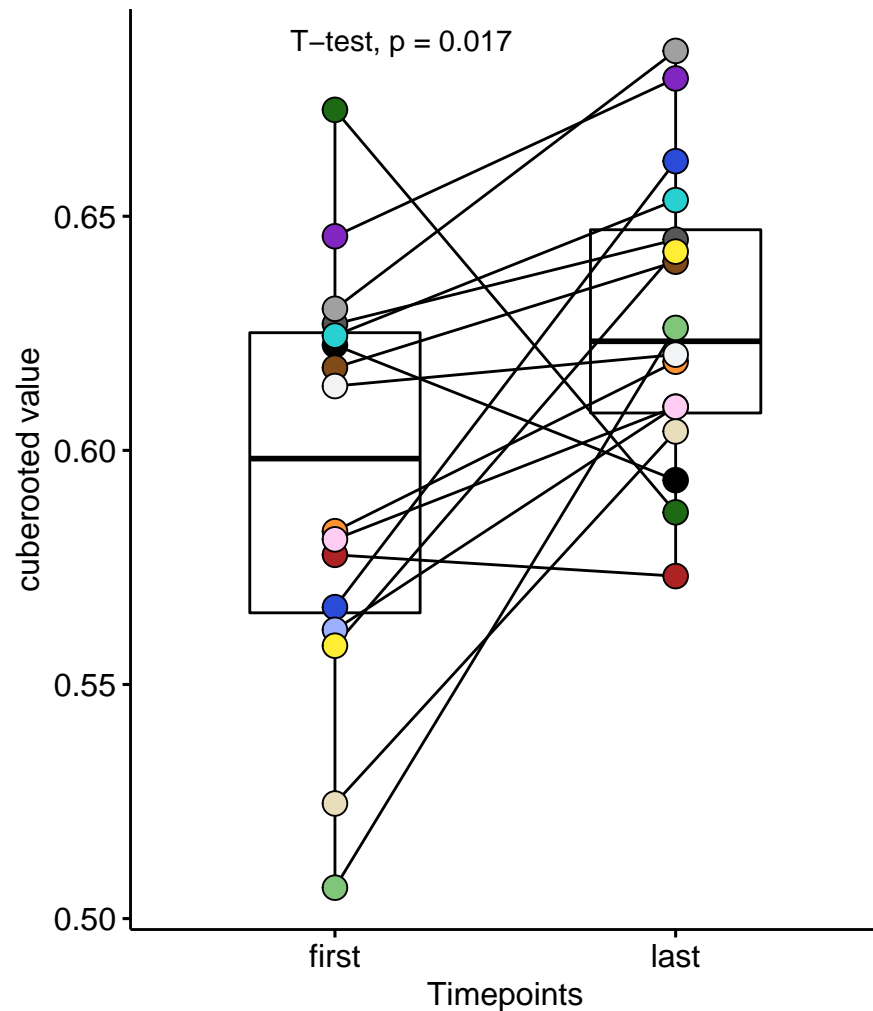

- PatID
- |              |               |              |              |
|--------------|---------------|--------------|--------------|
| 11_V68_8days | 18_V52_11days | 27_M71_4days | 40_V69_4days |
| 12_V73_7days | 21_V53_9days  | 28_V53_6days | 41_M70_6days |
| 13_M74_4days | 22_M65_3days  | 30_M49_5days | 44_M57_5days |
| 15_M71_7days | 25_M87_3days  | 32_V69_3days | 6d_M79_8days |

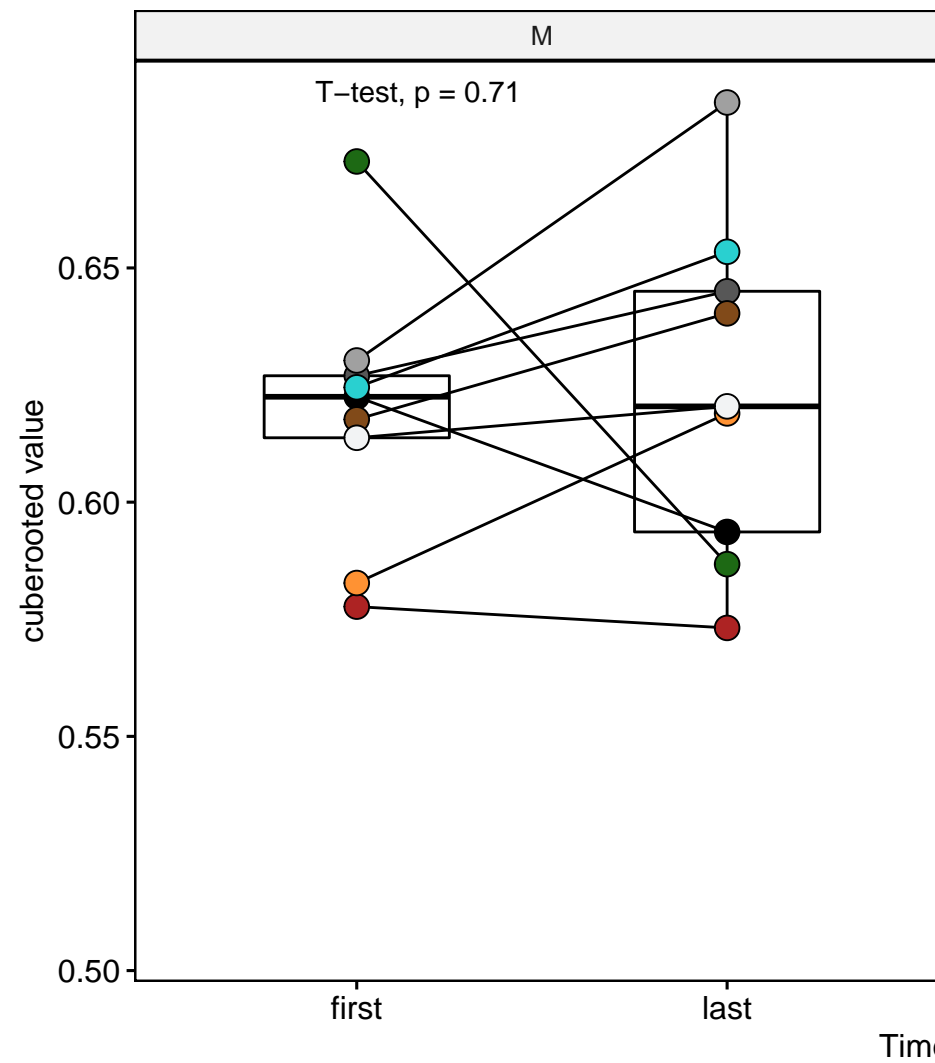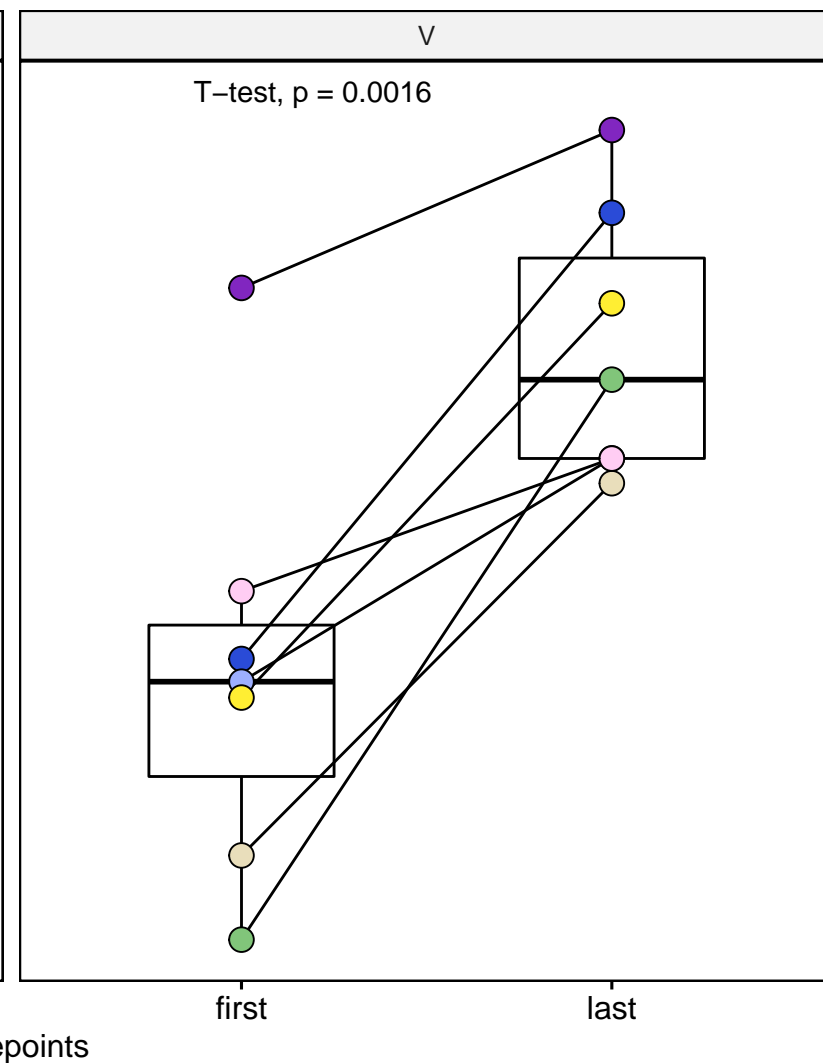

# GALECTIN9

all patients (M+V)

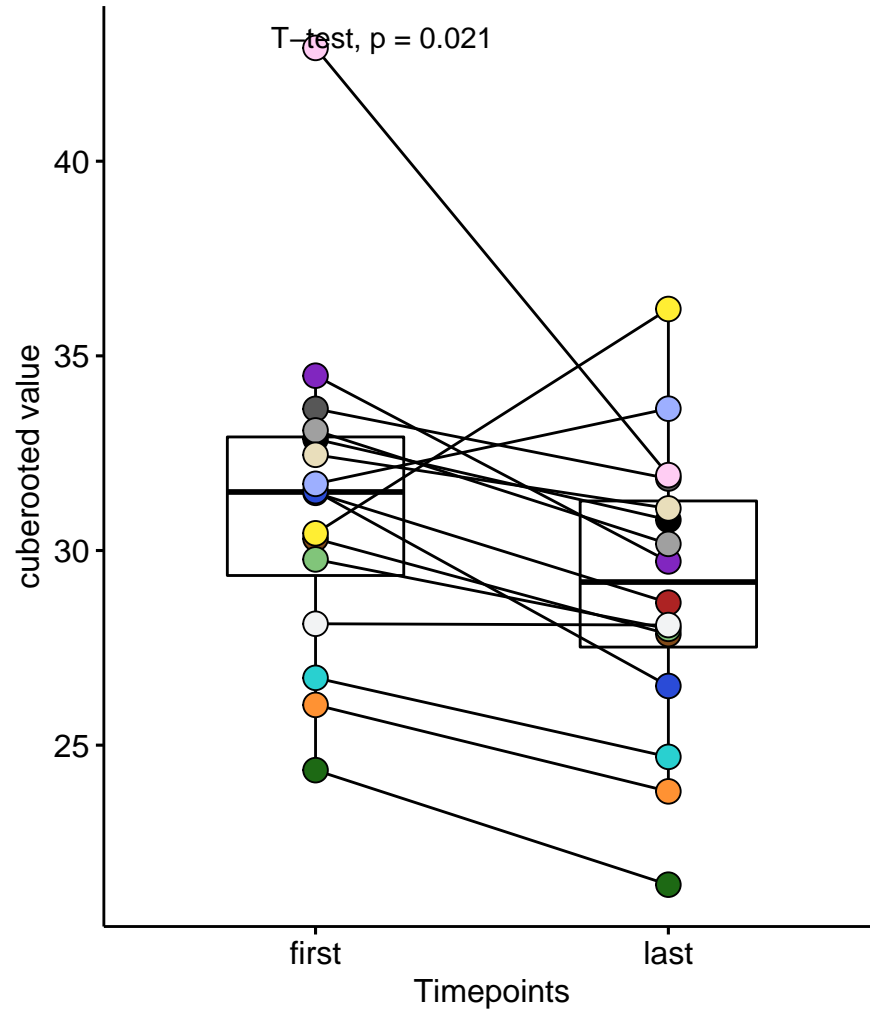

M

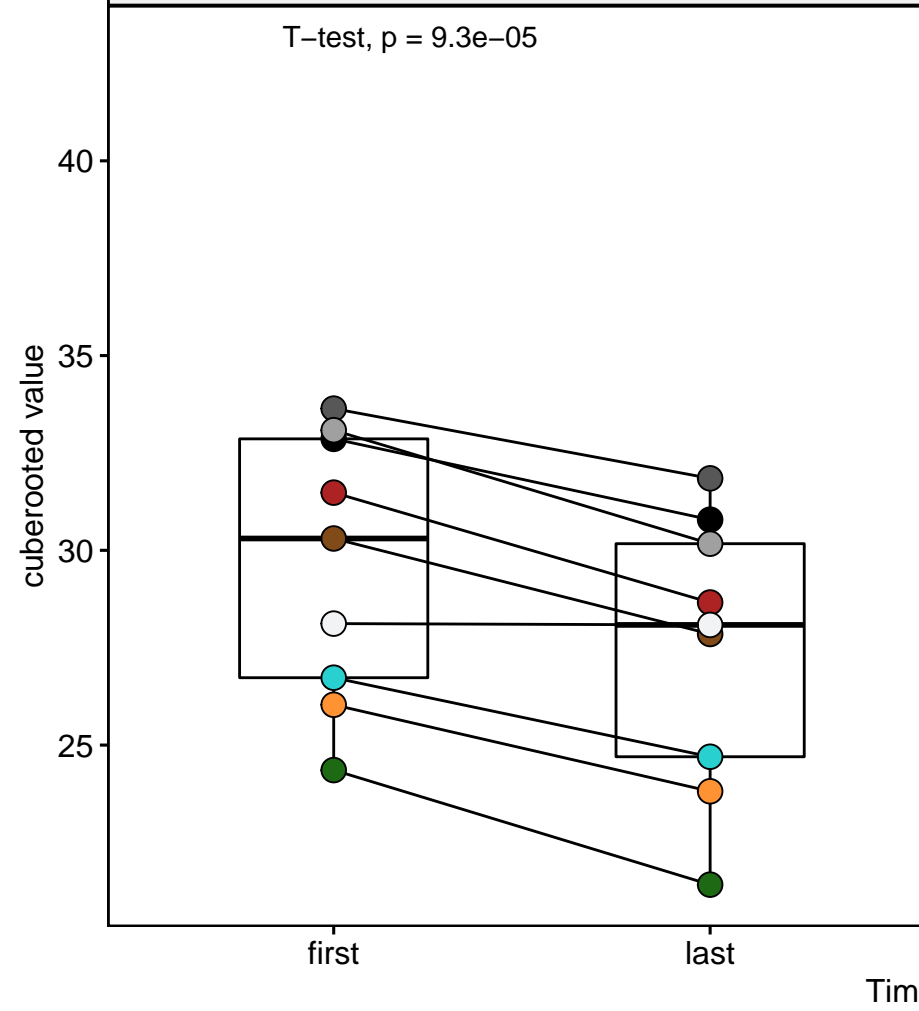

V

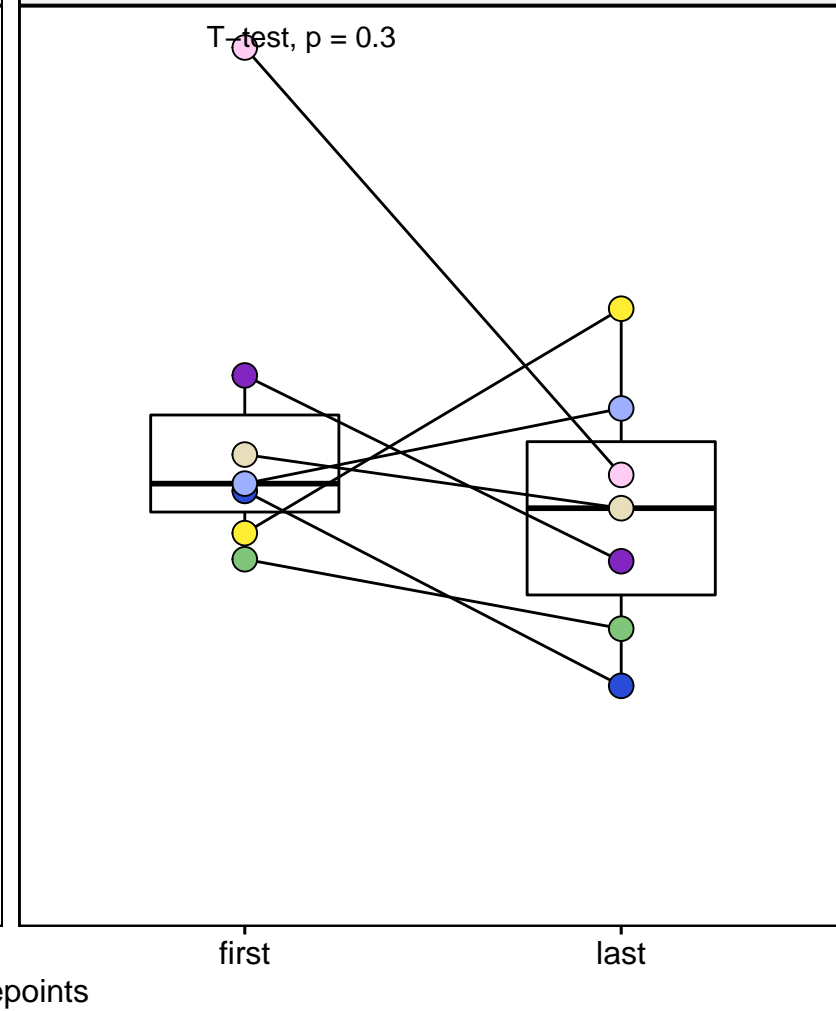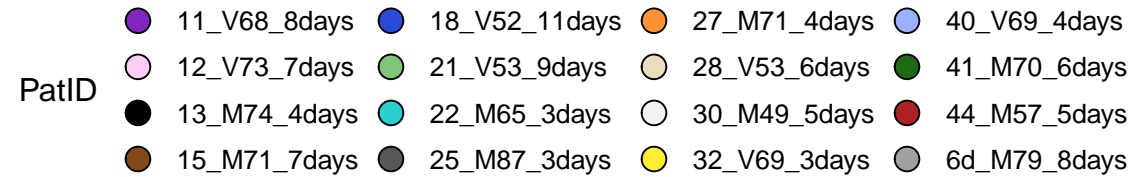



# Ornithine\_amines

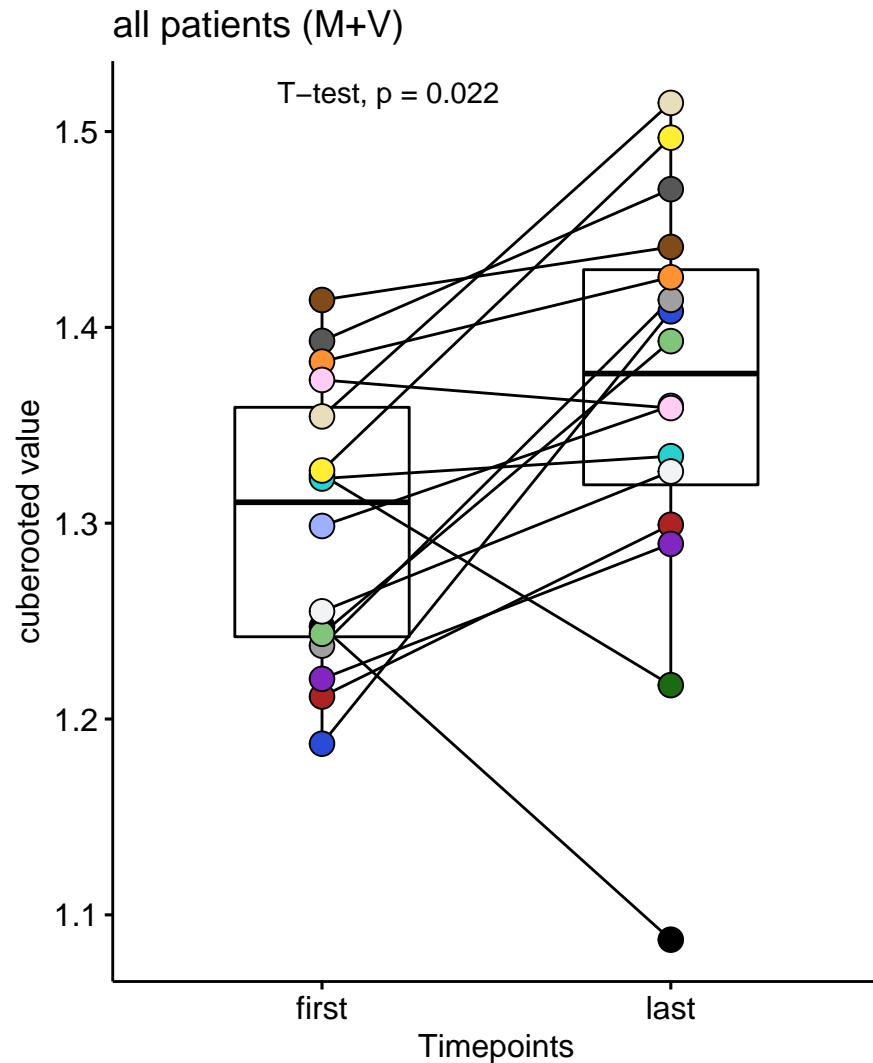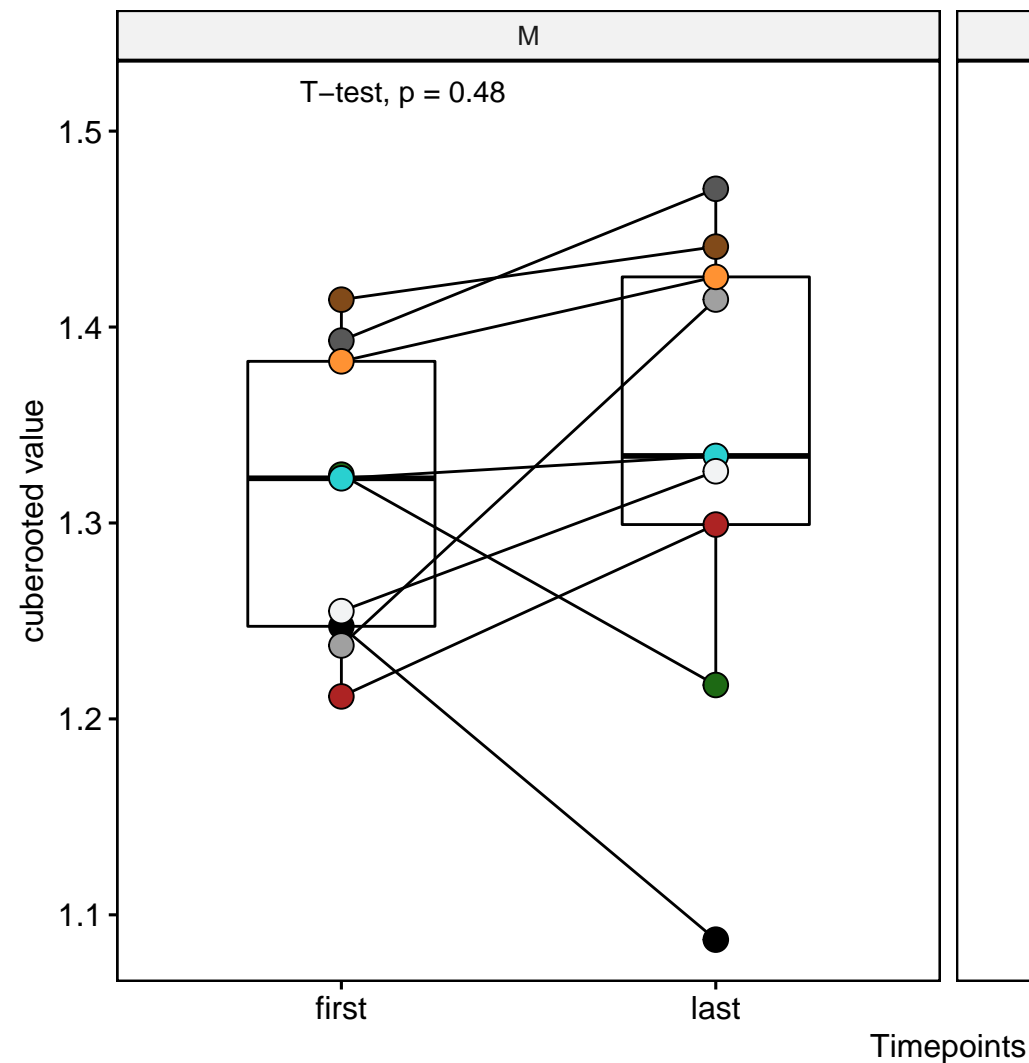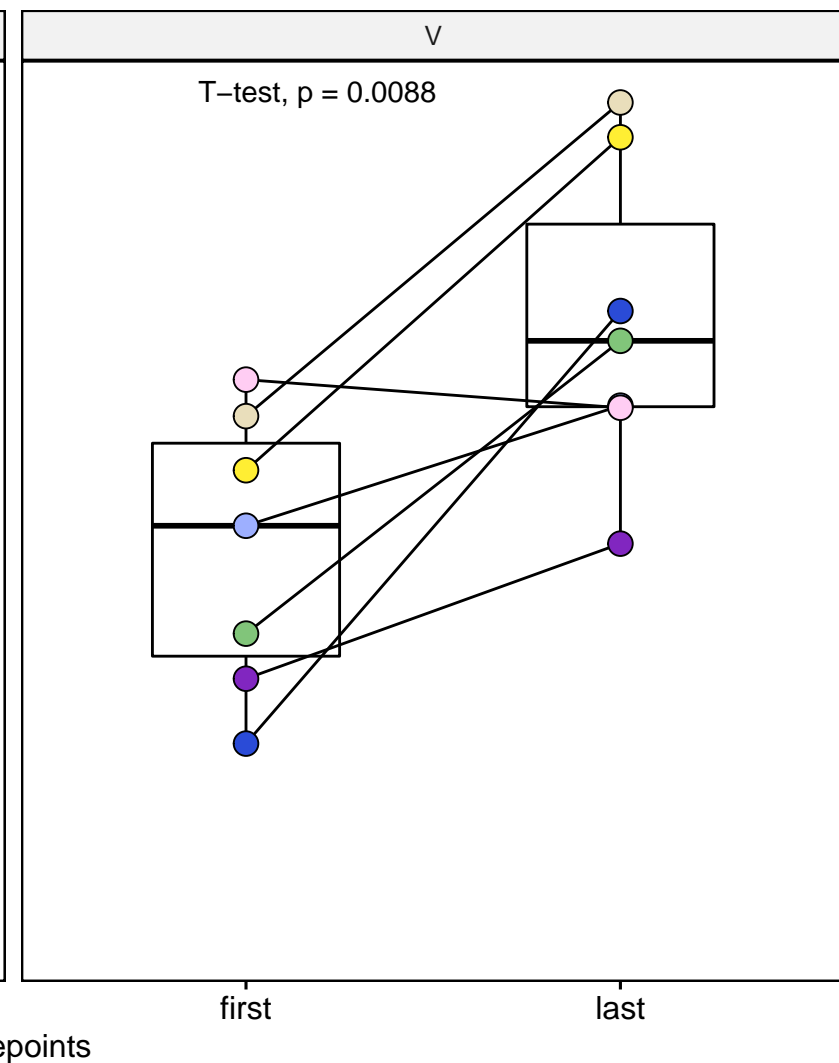

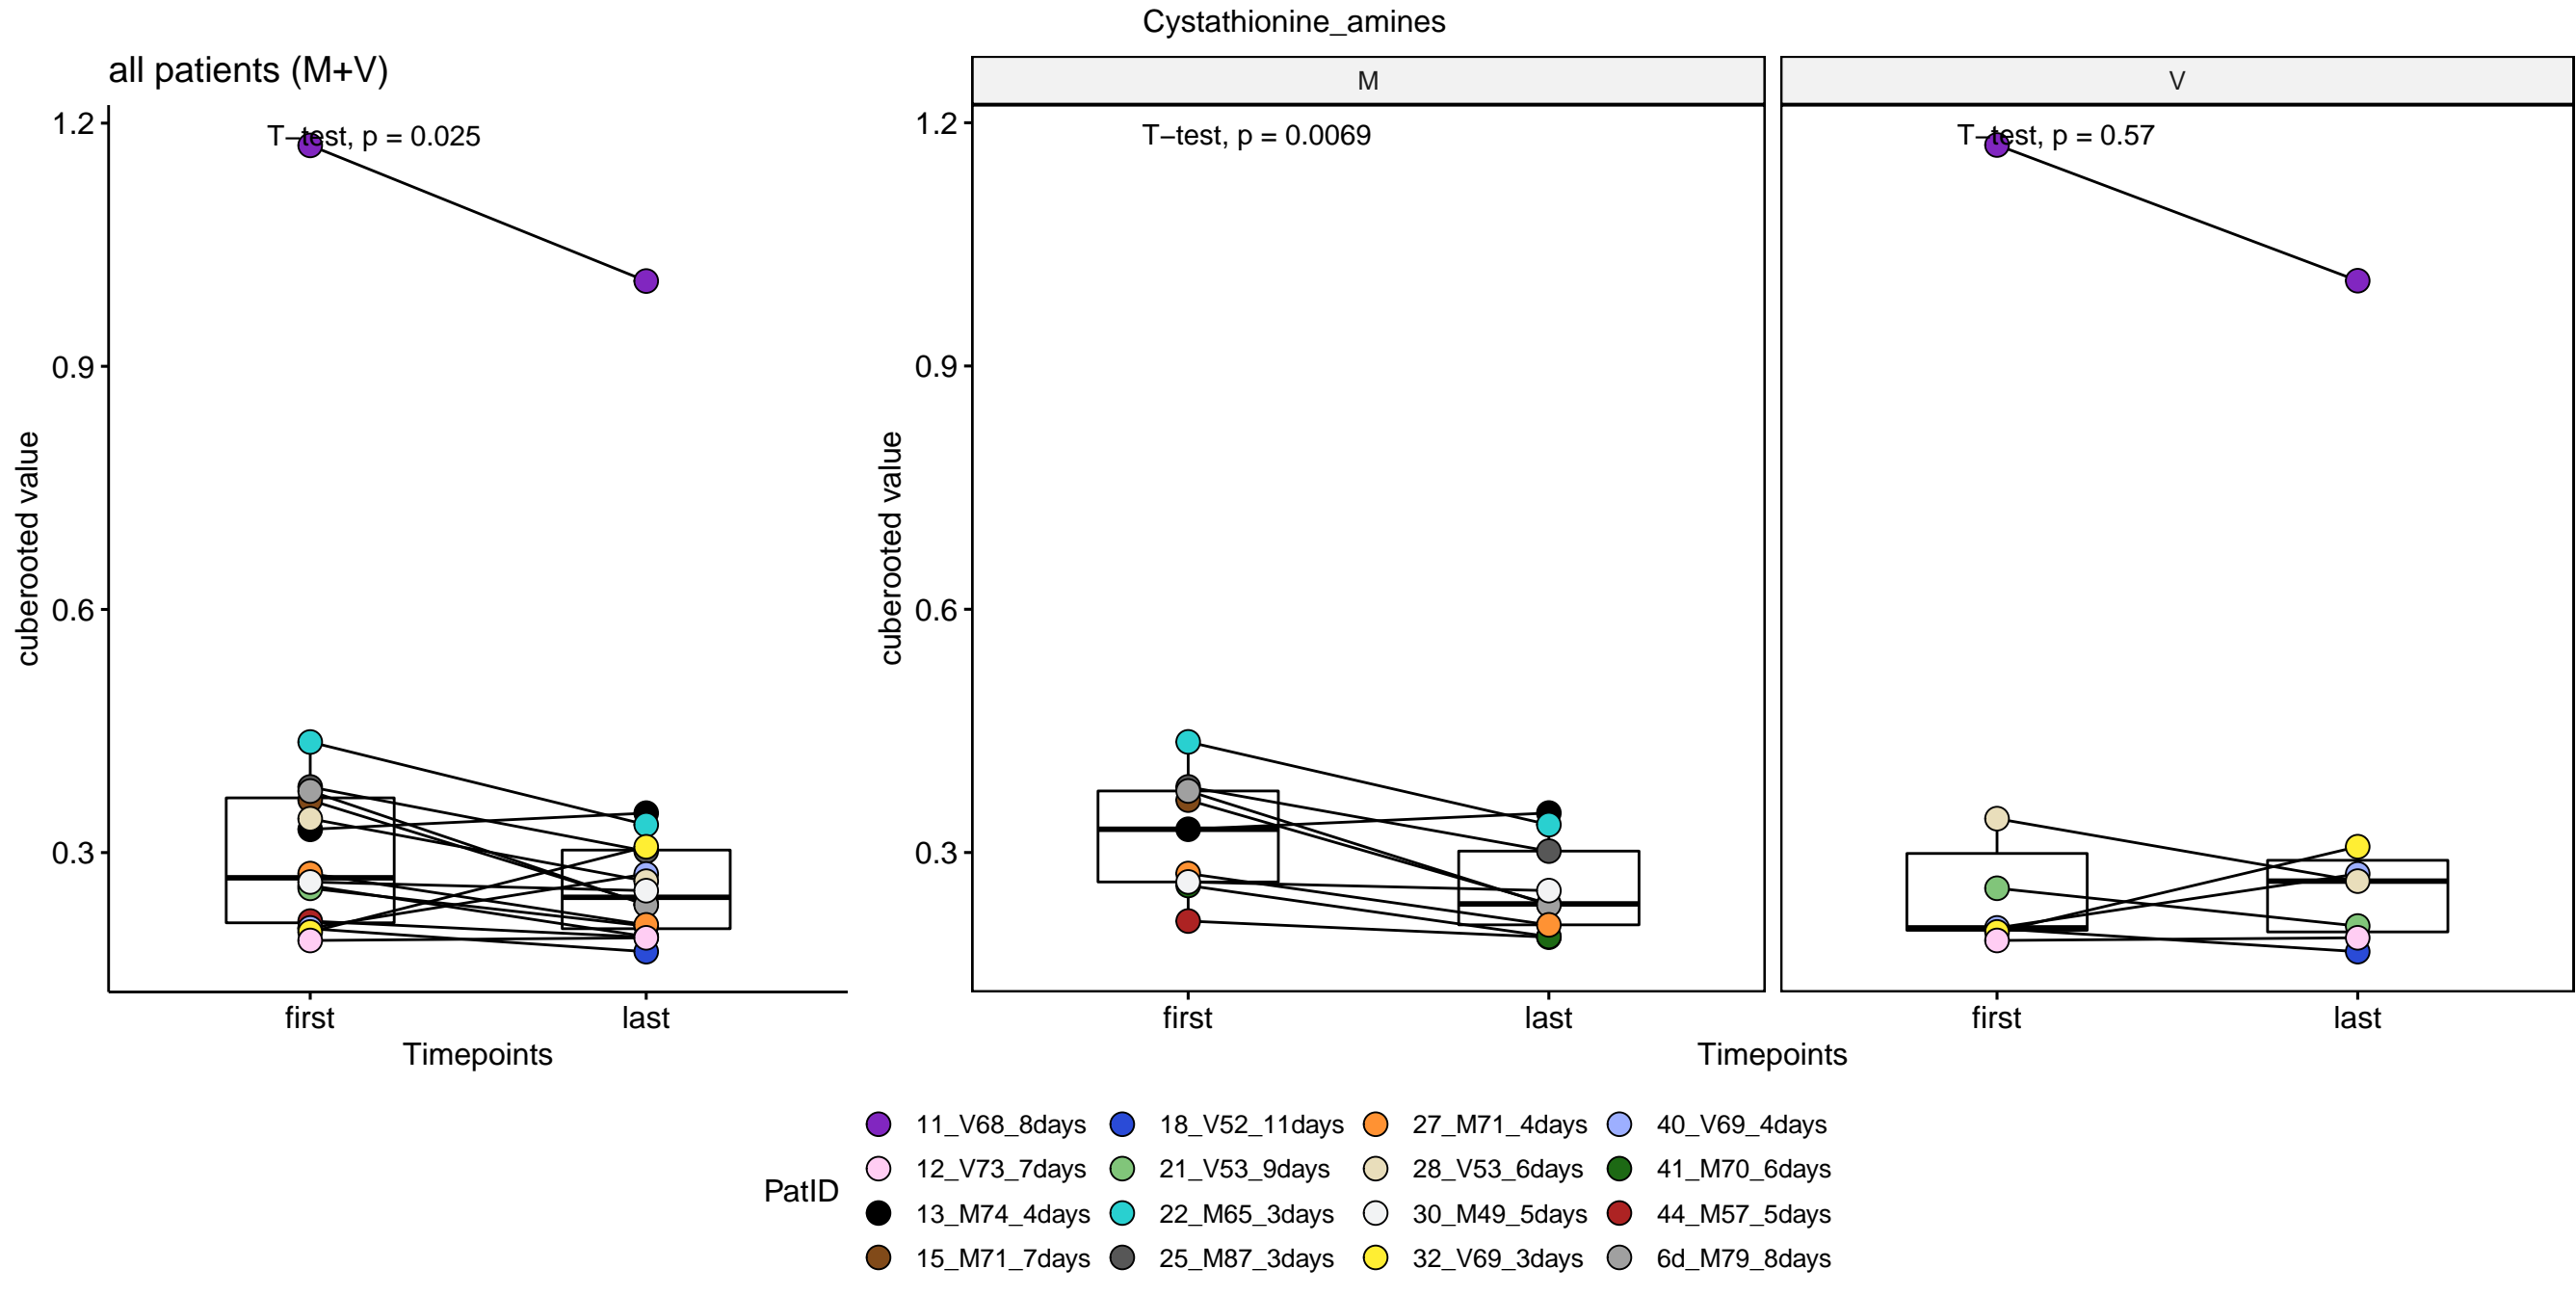

# Methionine.sulfone\_amines

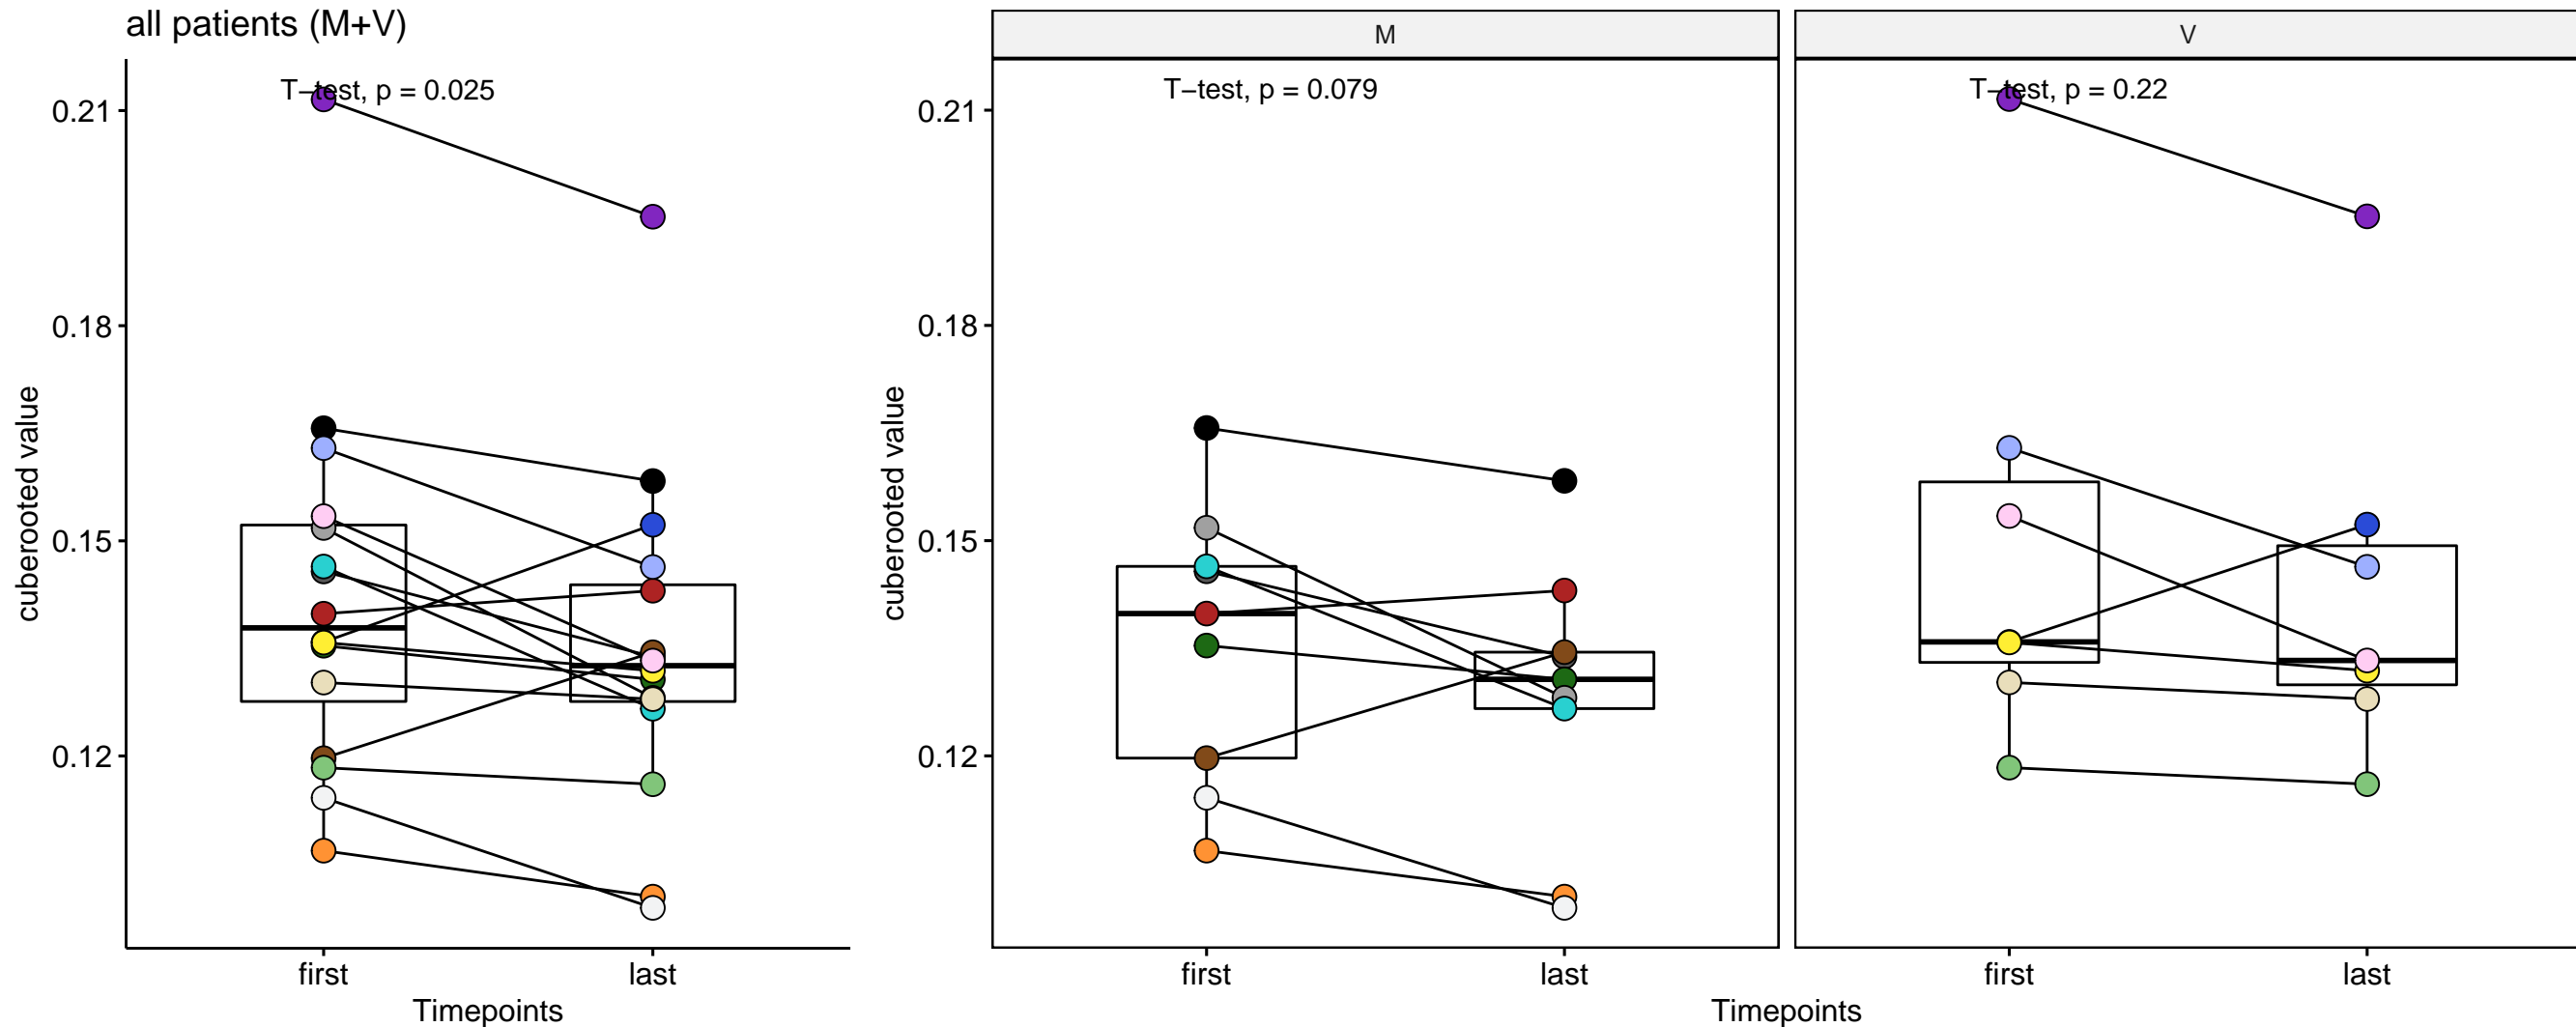

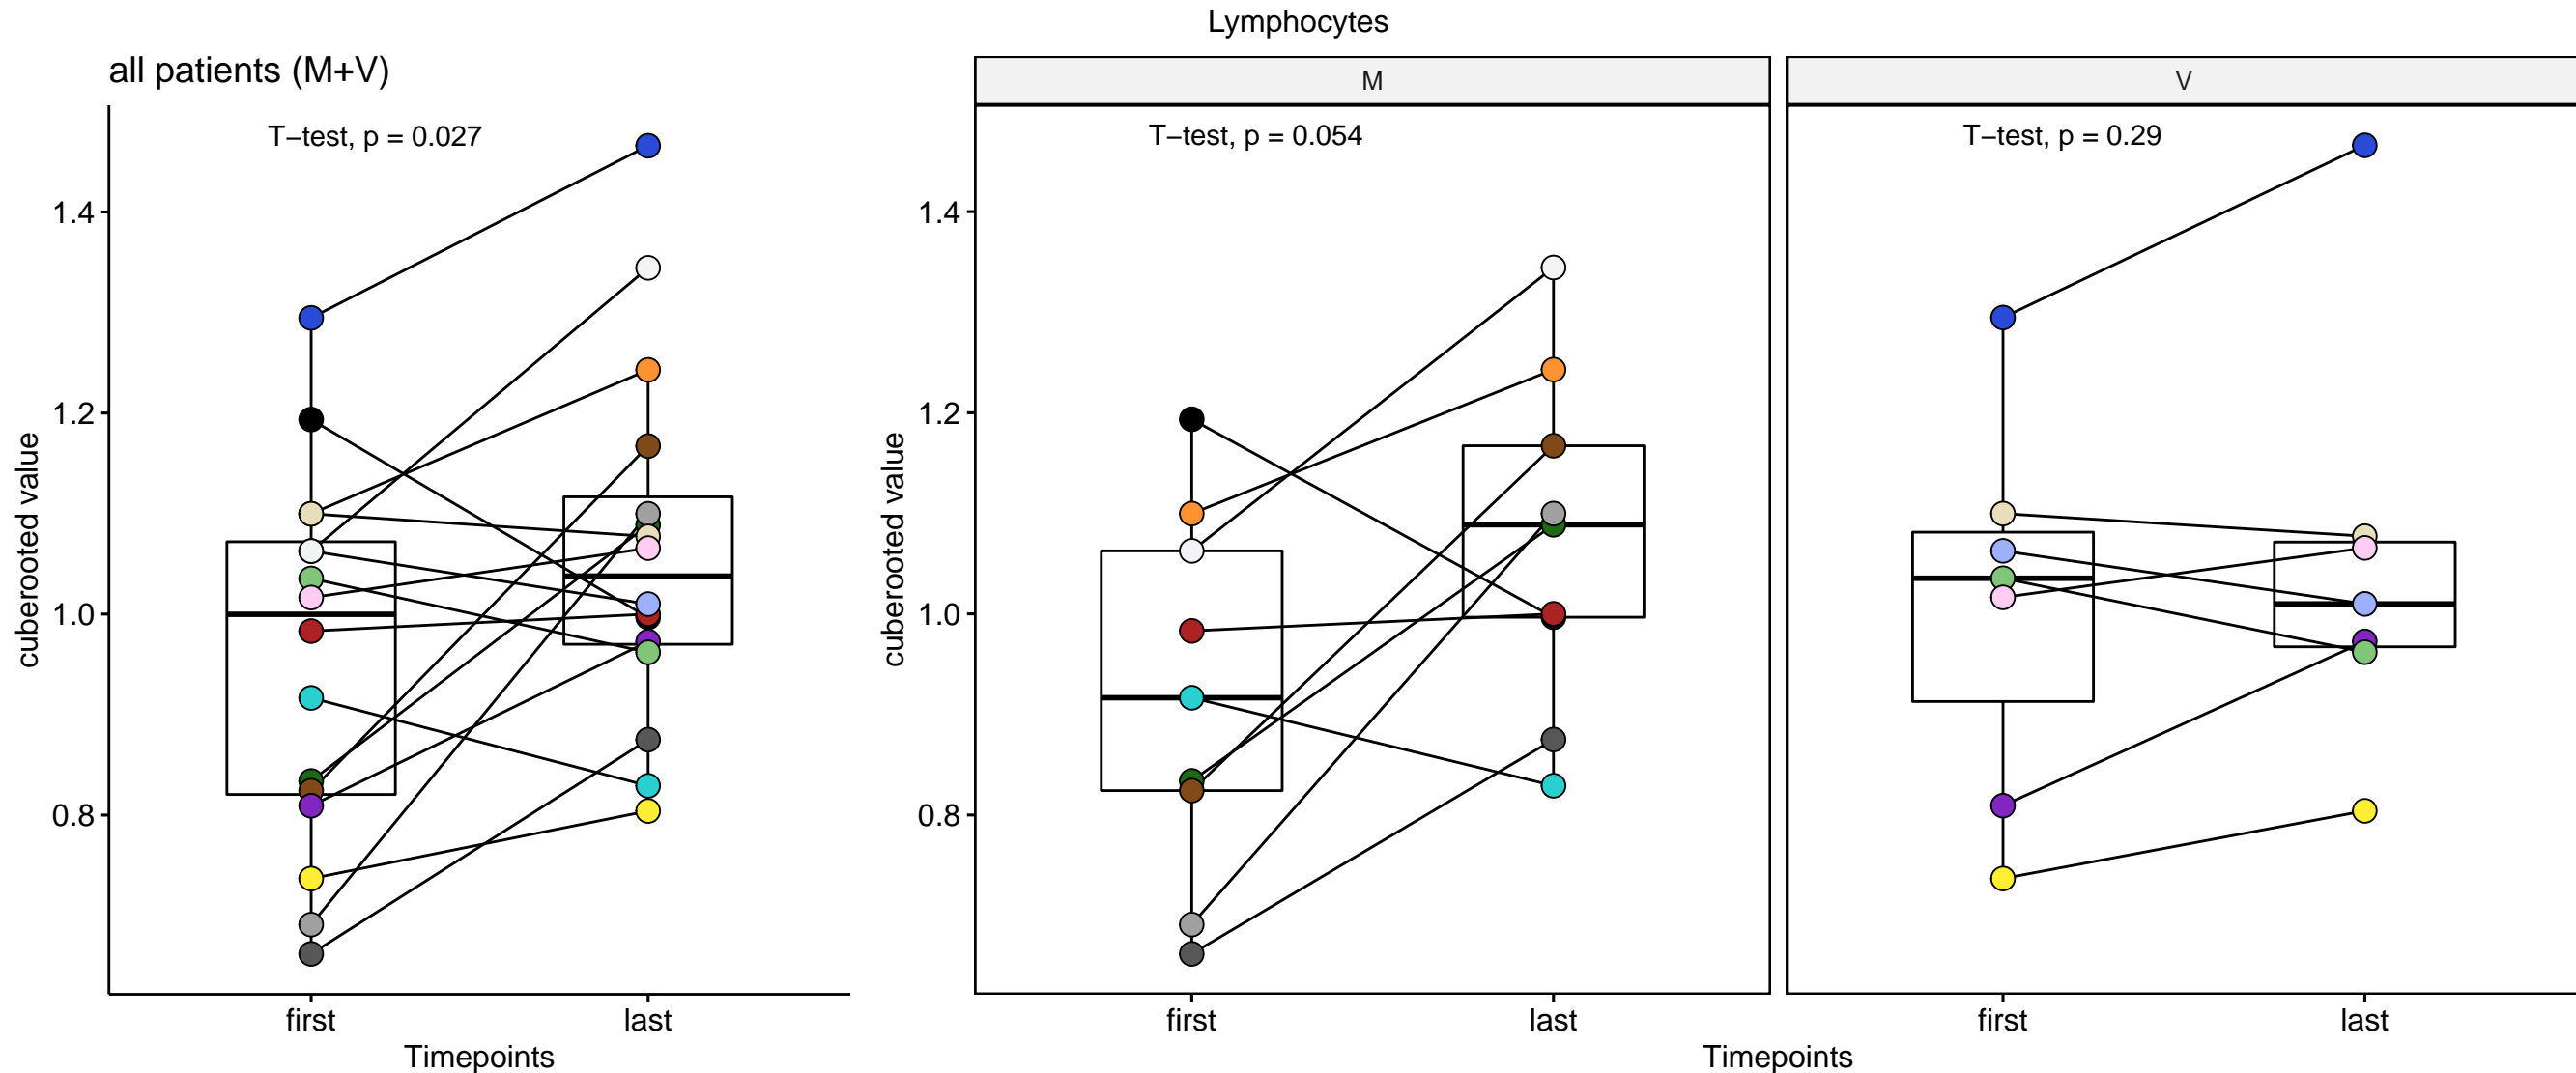

PatID

|              |               |              |              |
|--------------|---------------|--------------|--------------|
| 11_V68_8days | 18_V52_11days | 27_M71_4days | 40_V69_4days |
| 12_V73_7days | 21_V53_9days  | 28_V53_6days | 41_M70_6days |
| 13_M74_4days | 22_M65_3days  | 30_M49_5days | 44_M57_5days |
| 15_M71_7days | 25_M87_3days  | 32_V69_3days | 6d_M79_8days |

# CD8

all patients (M+V)

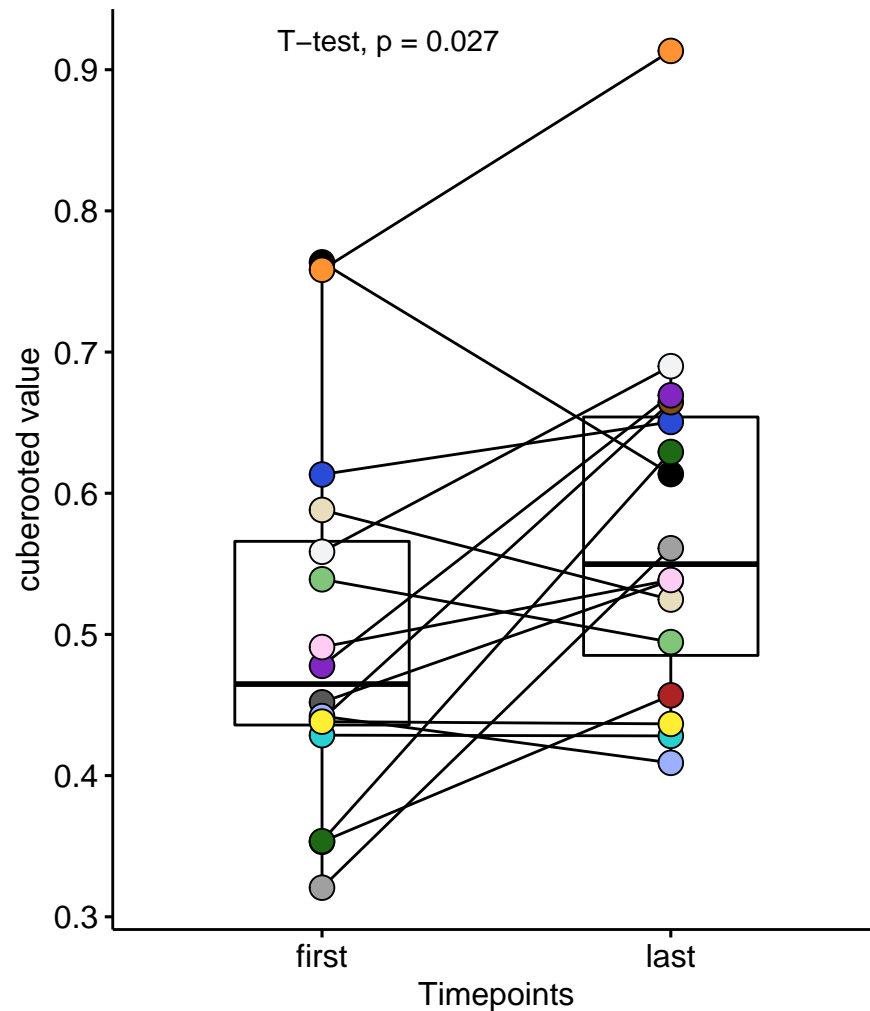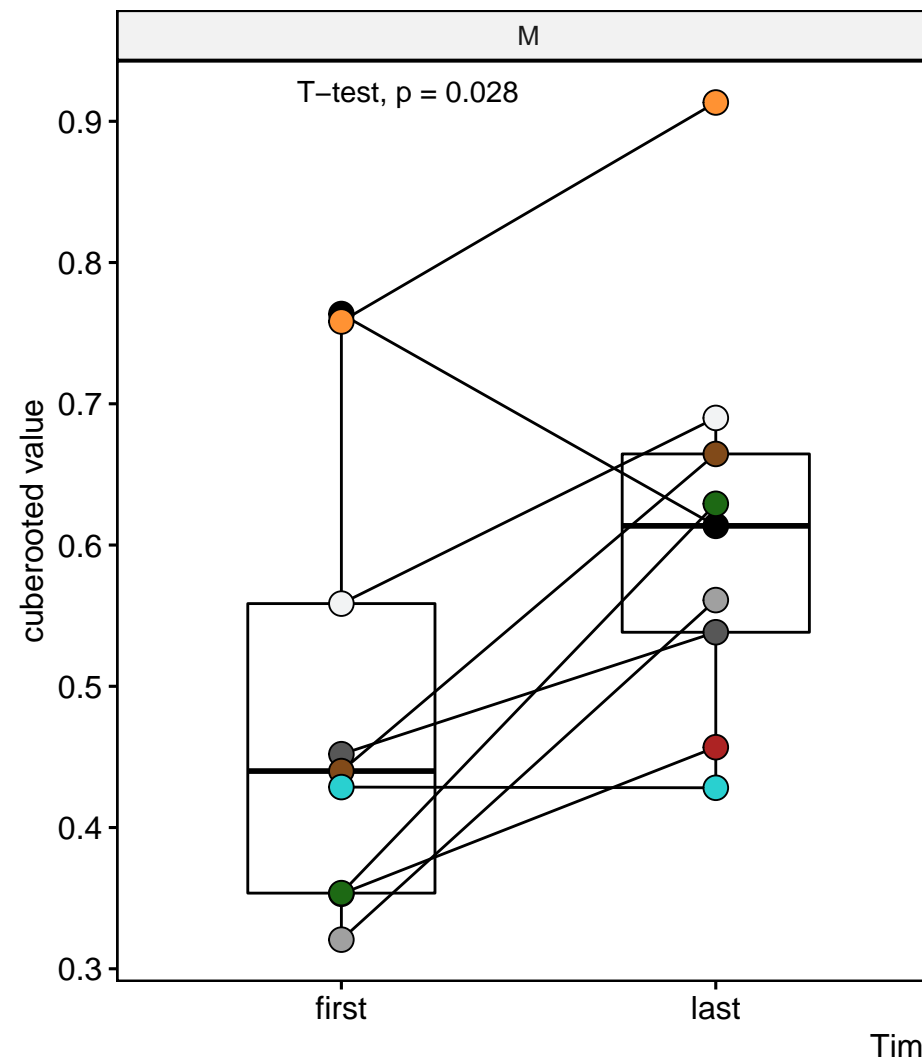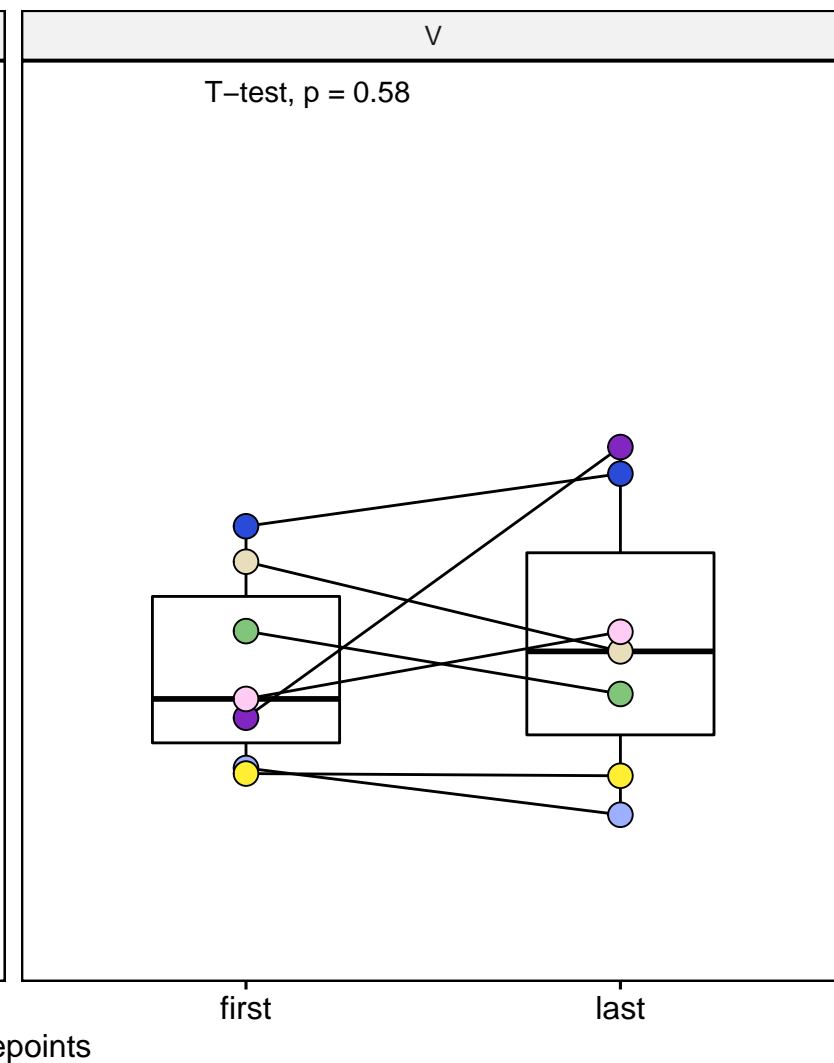

# L.Aspartic.acid\_amines

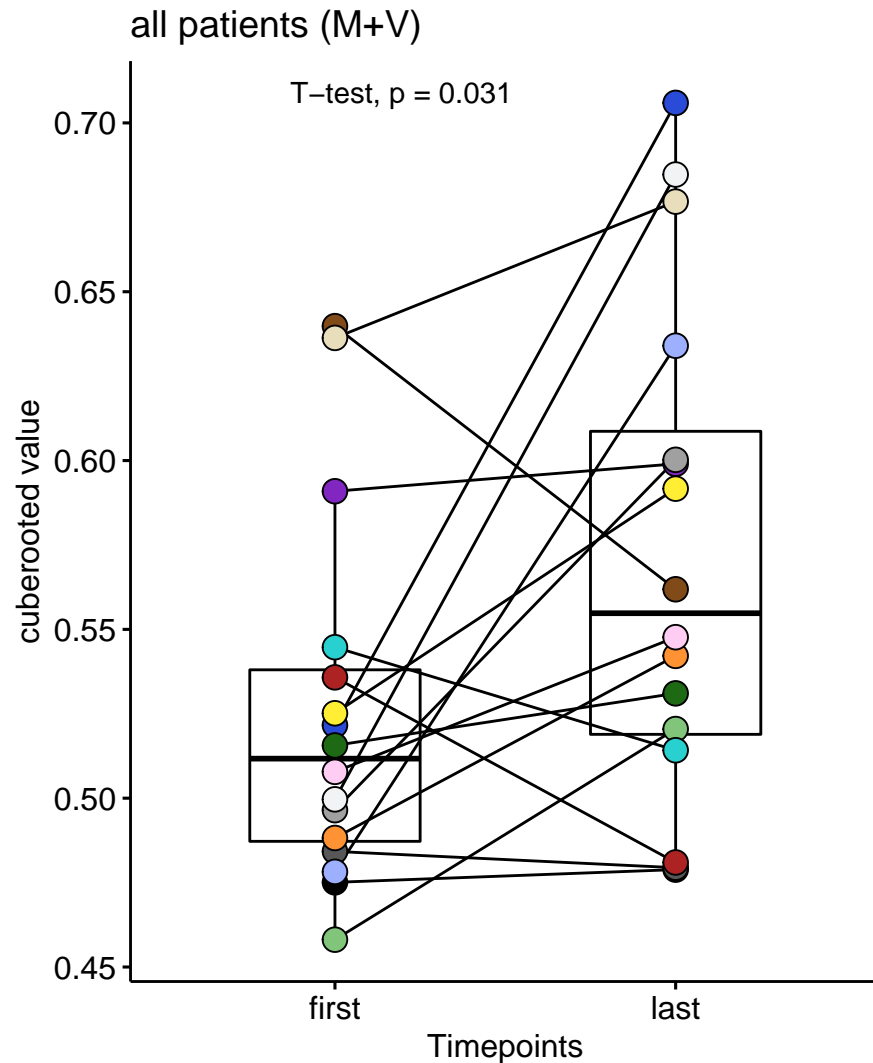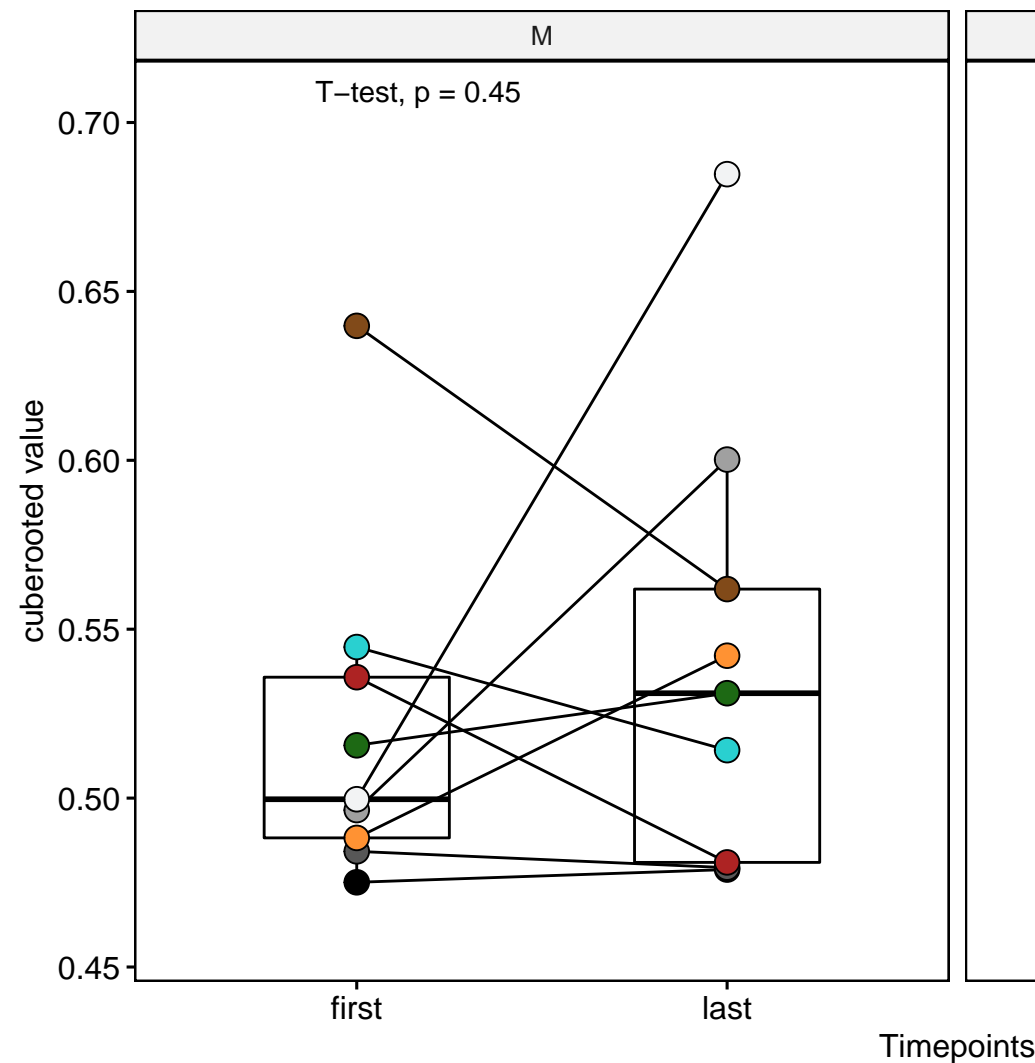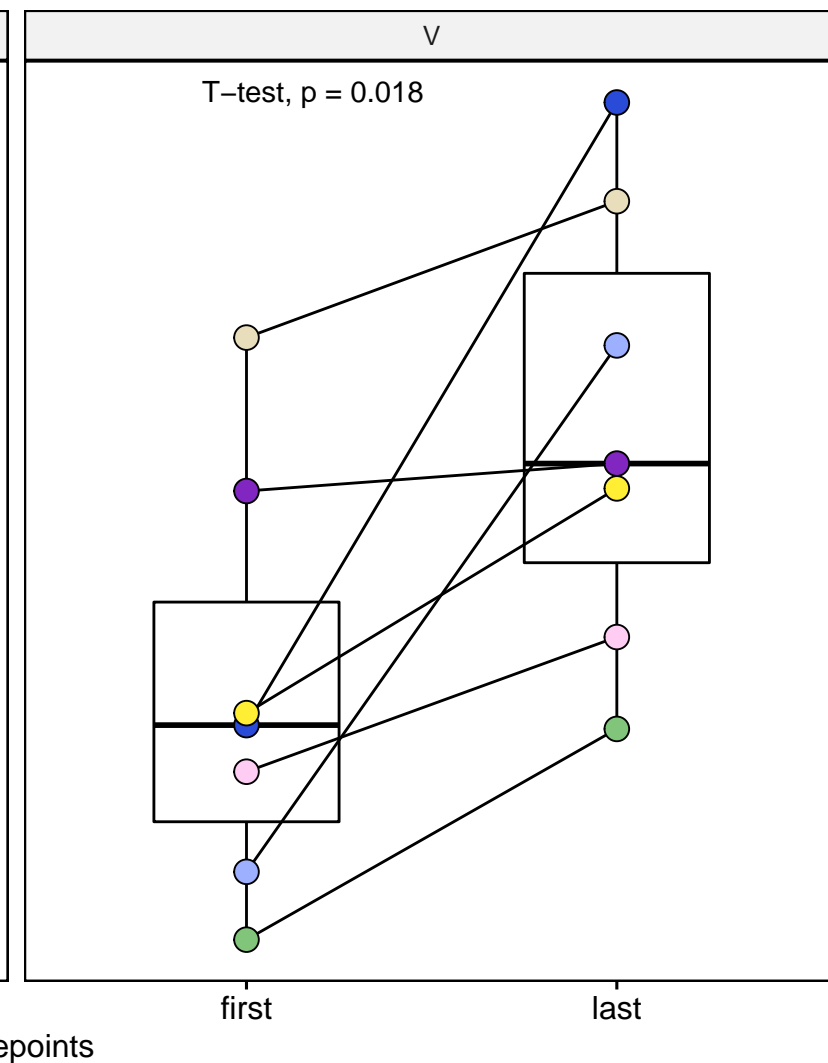

# L.Homoserine\_amines

all patients (M+V)

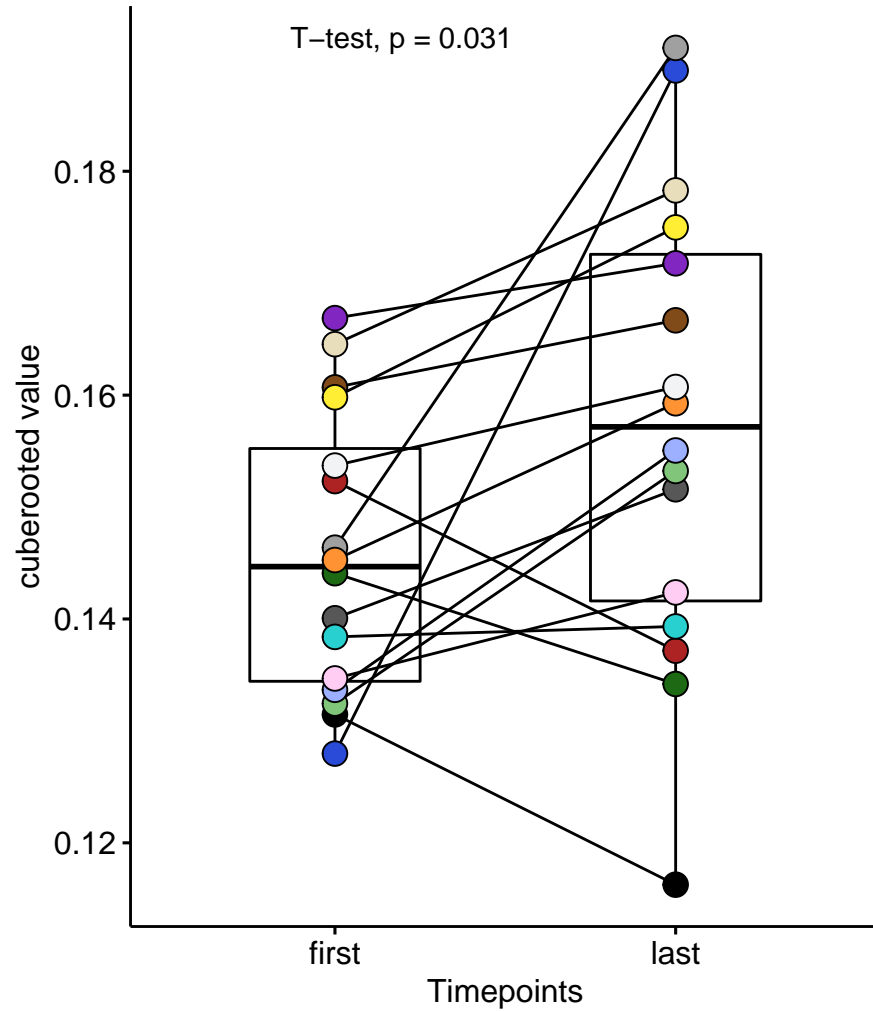

- PatID
- |              |               |              |              |
|--------------|---------------|--------------|--------------|
| 11_V68_8days | 18_V52_11days | 27_M71_4days | 40_V69_4days |
| 12_V73_7days | 21_V53_9days  | 28_V53_6days | 41_M70_6days |
| 13_M74_4days | 22_M65_3days  | 30_M49_5days | 44_M57_5days |
| 15_M71_7days | 25_M87_3days  | 32_V69_3days | 6d_M79_8days |

M

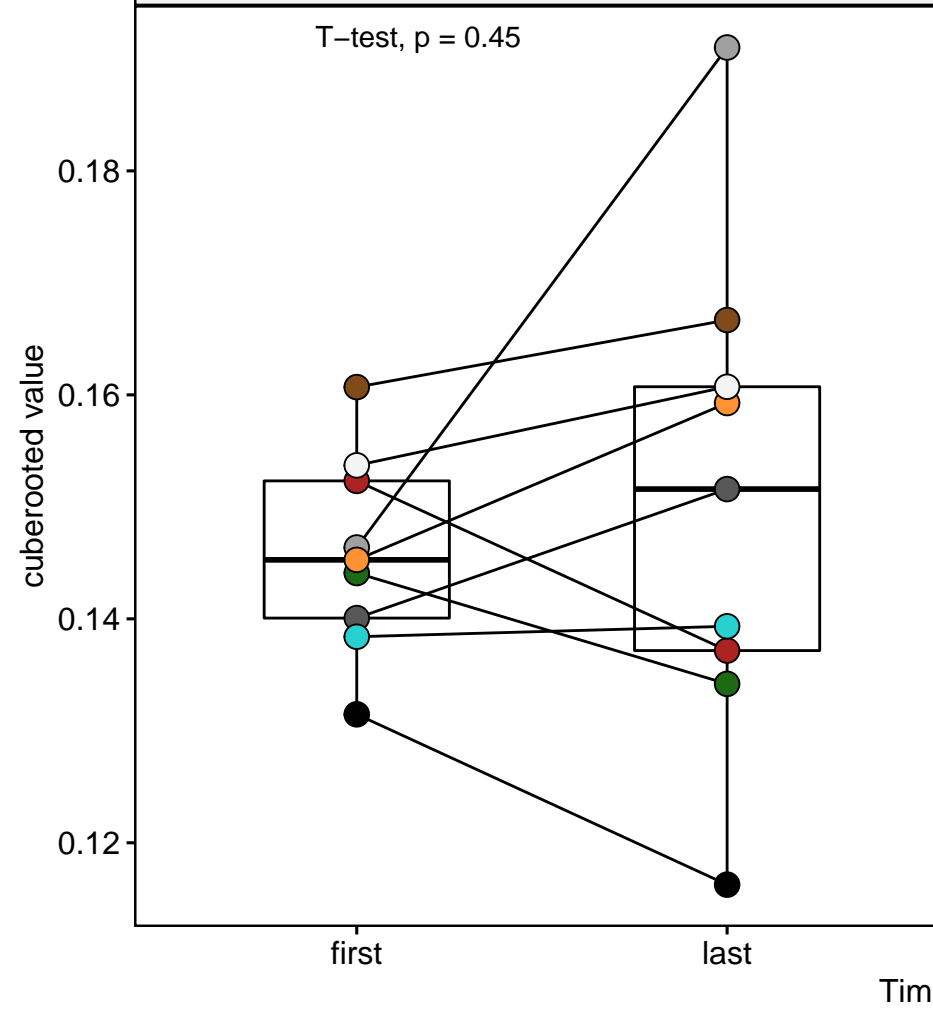

V

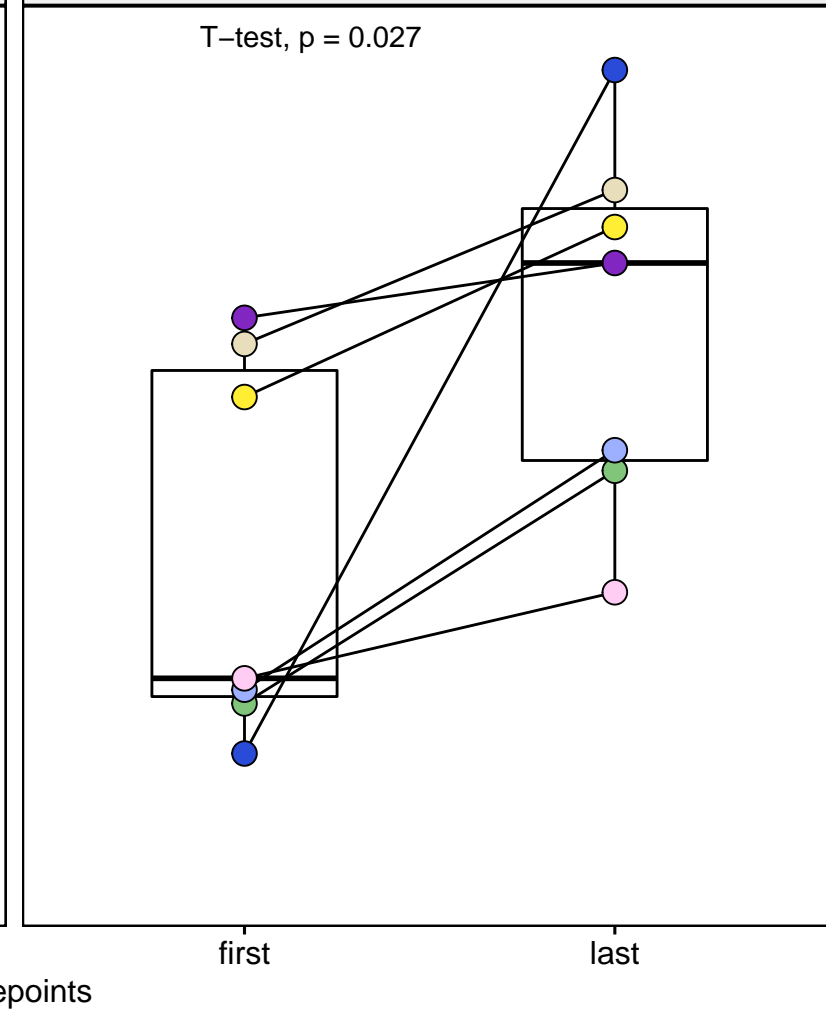

# Glycylproline\_amines

all patients (M+V)

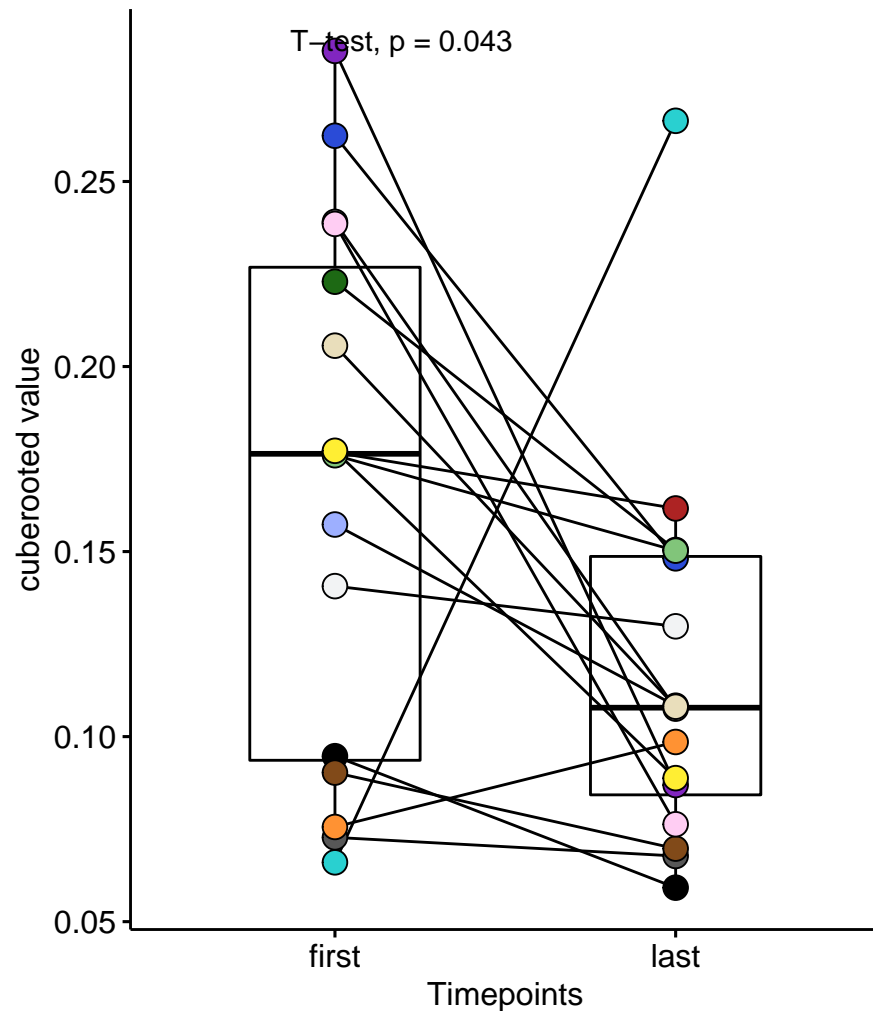

M

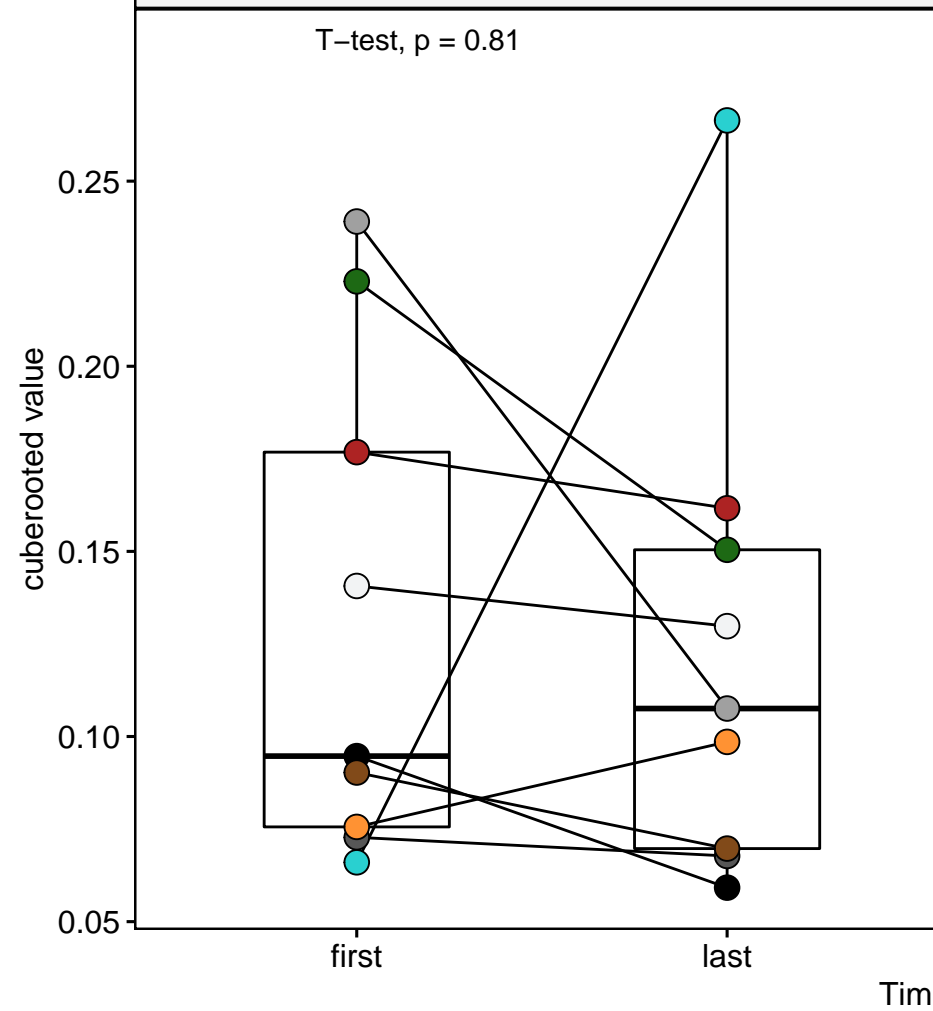

V

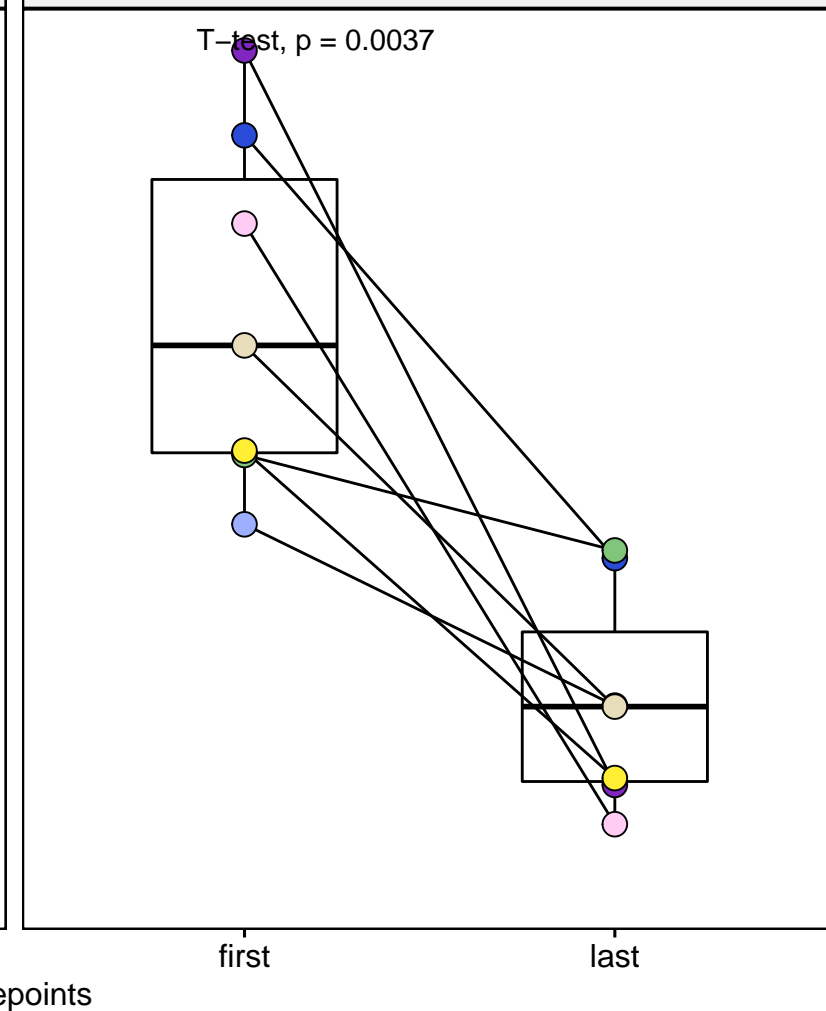



# L.Asparagine\_amines

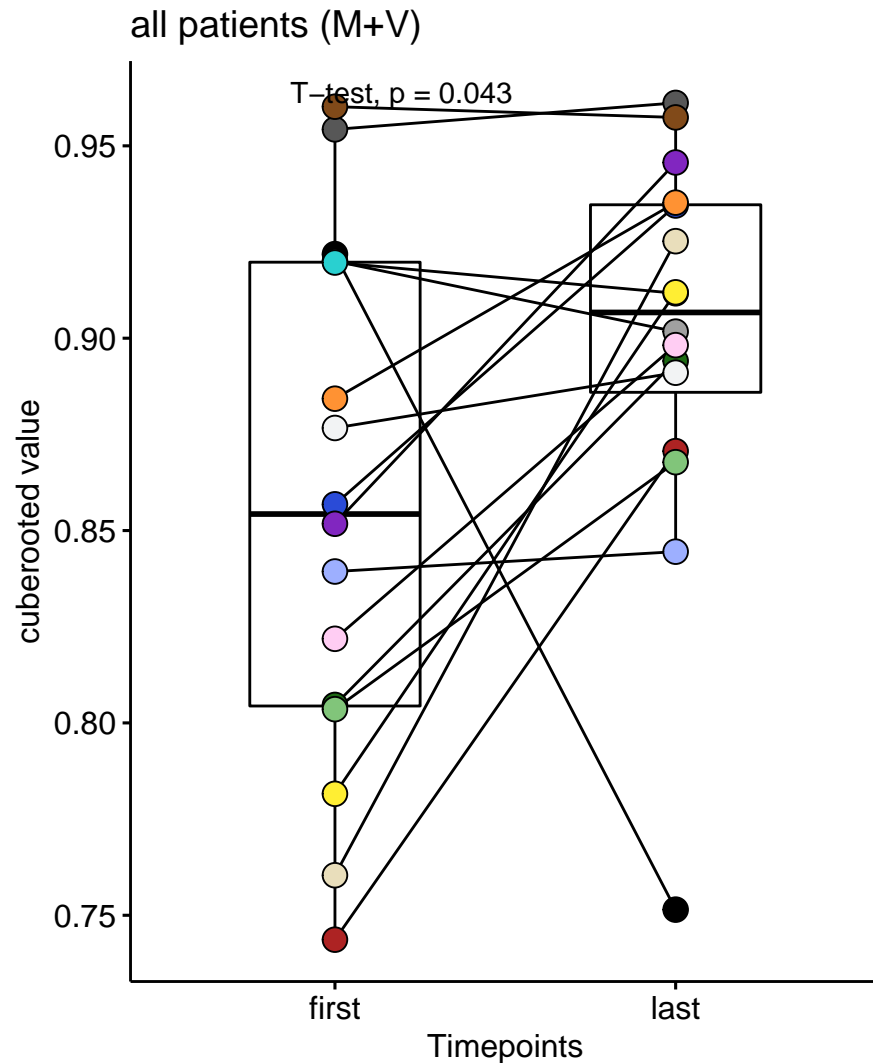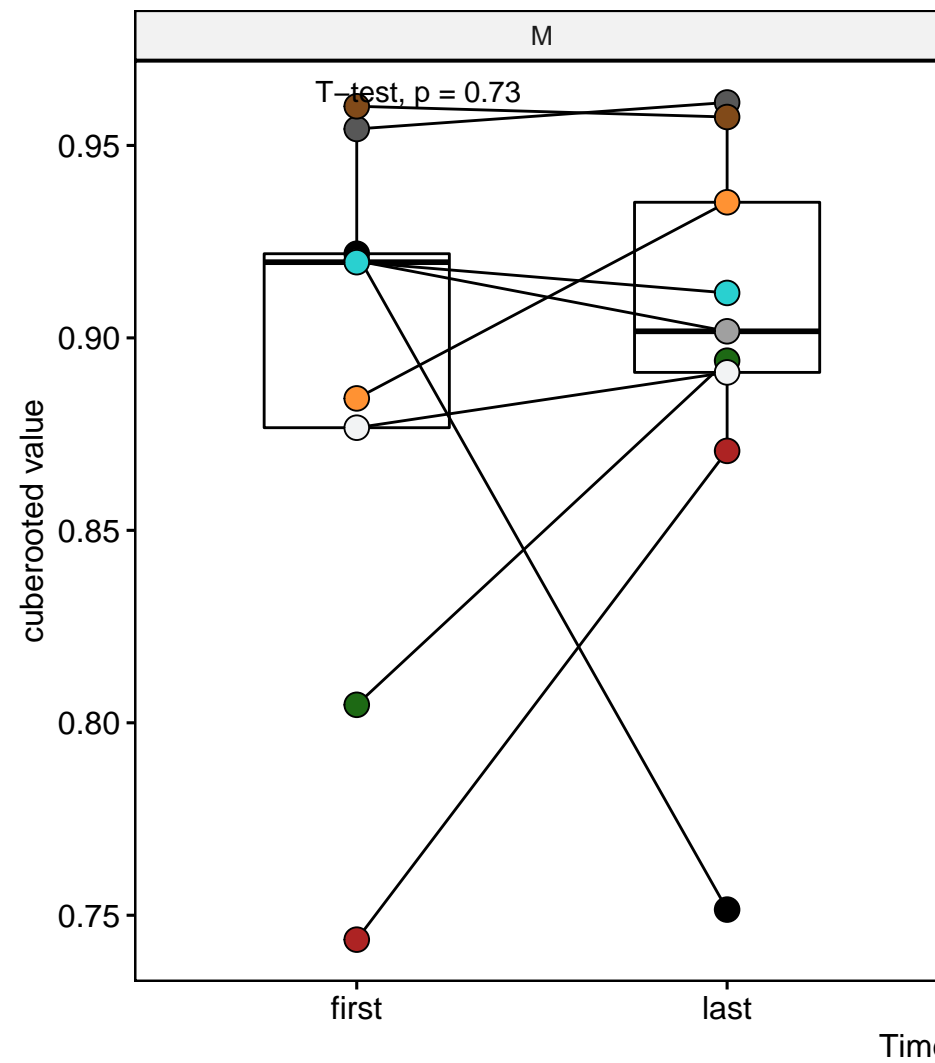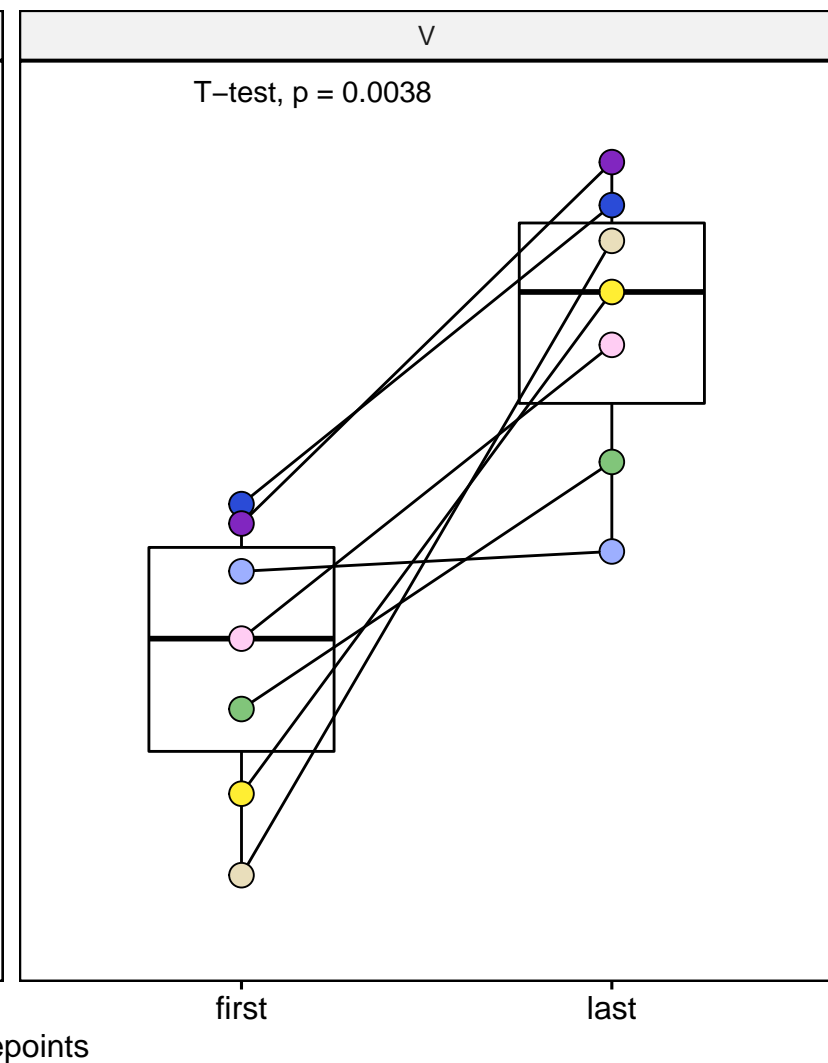

# X4OHPro\_Pro

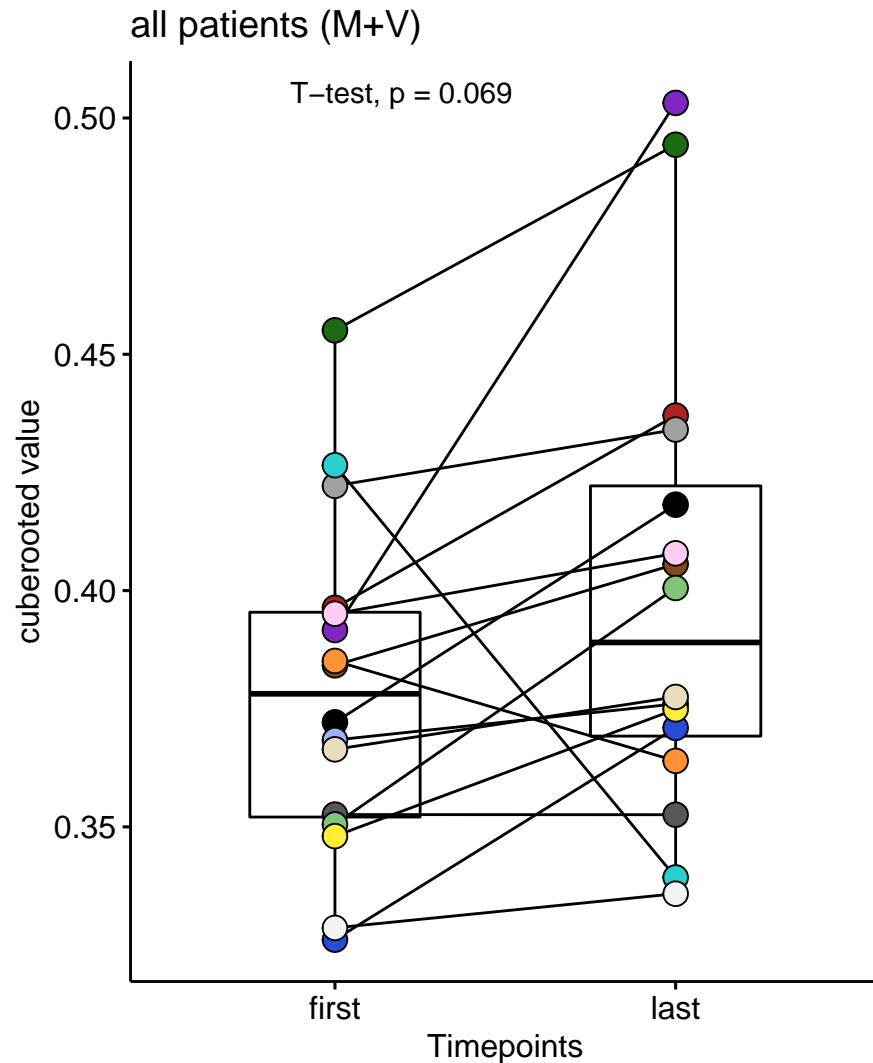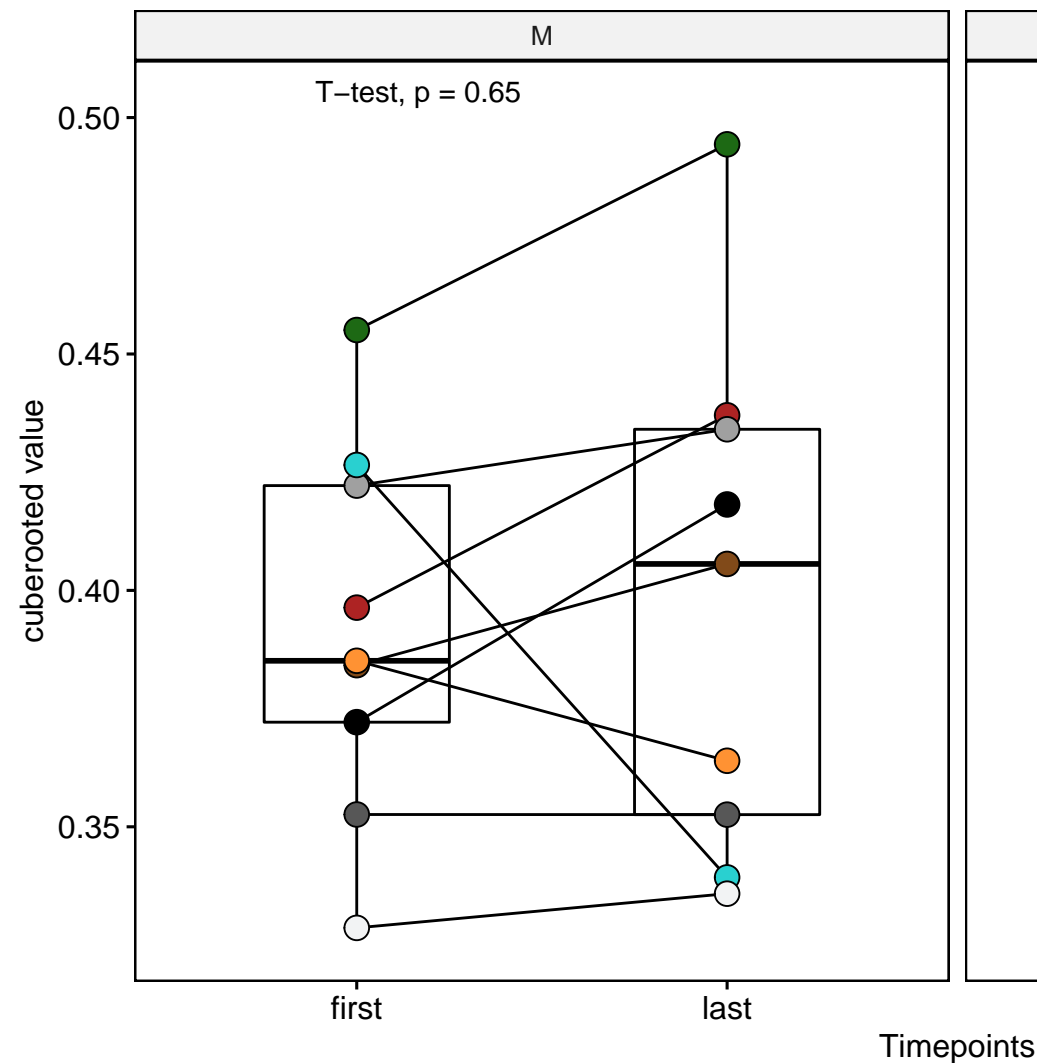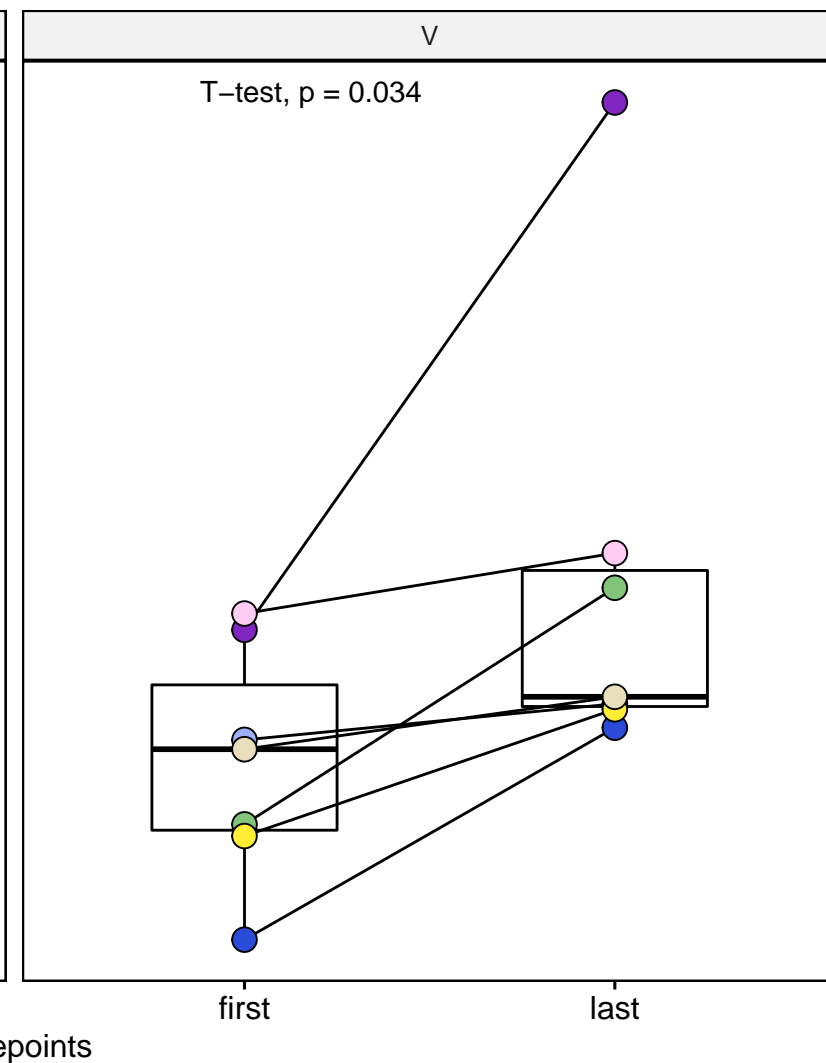

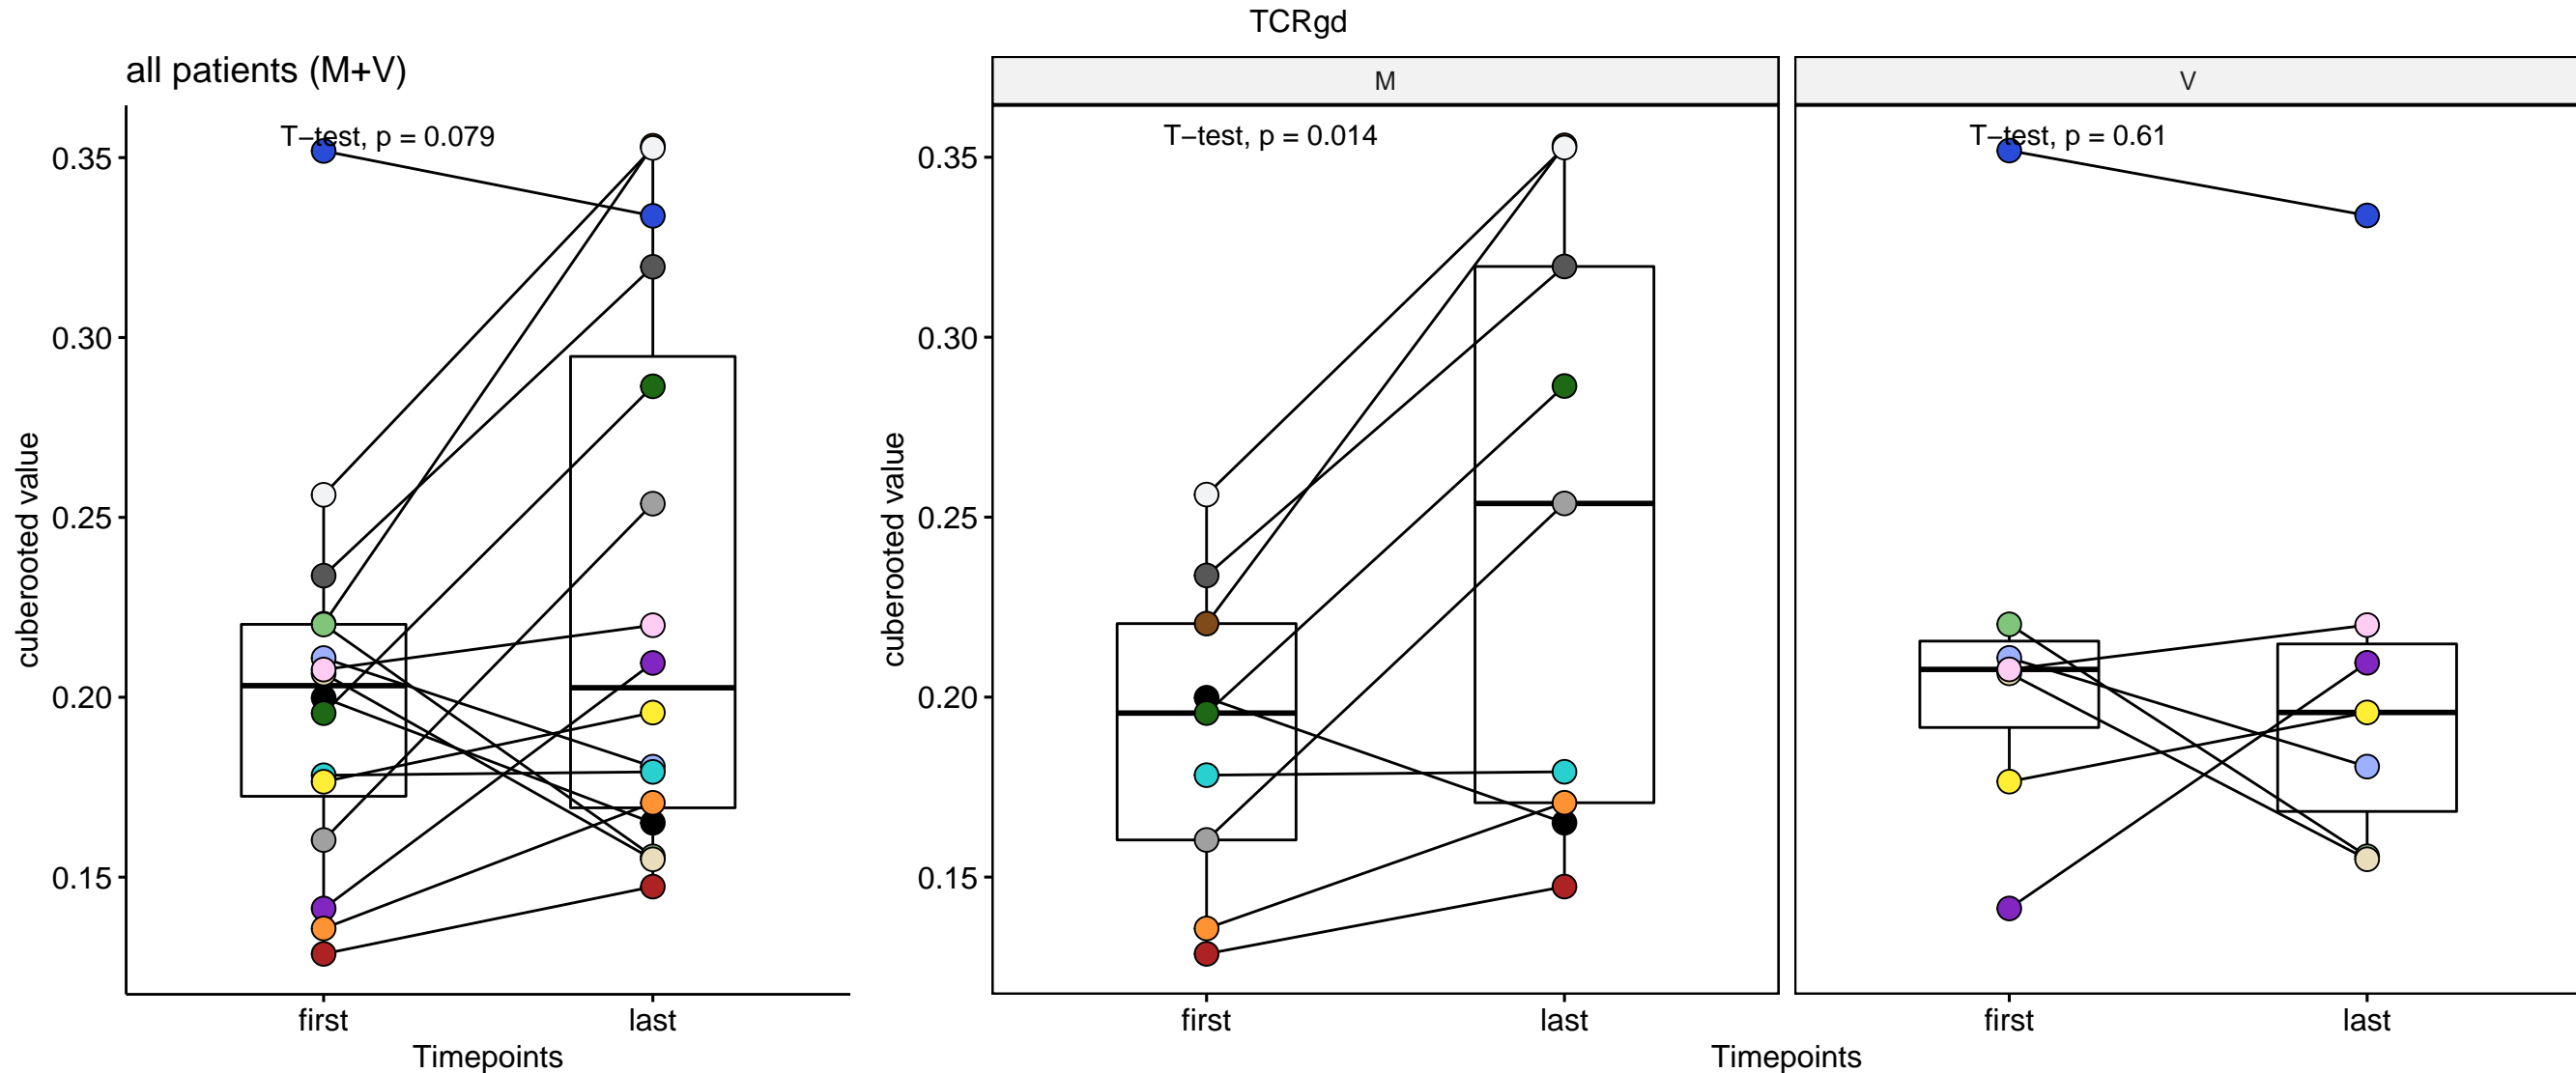

PatID

|              |               |              |              |
|--------------|---------------|--------------|--------------|
| 11_V68_8days | 18_V52_11days | 27_M71_4days | 40_V69_4days |
| 12_V73_7days | 21_V53_9days  | 28_V53_6days | 41_M70_6days |
| 13_M74_4days | 22_M65_3days  | 30_M49_5days | 44_M57_5days |
| 15_M71_7days | 25_M87_3days  | 32_V69_3days | 6d_M79_8days |

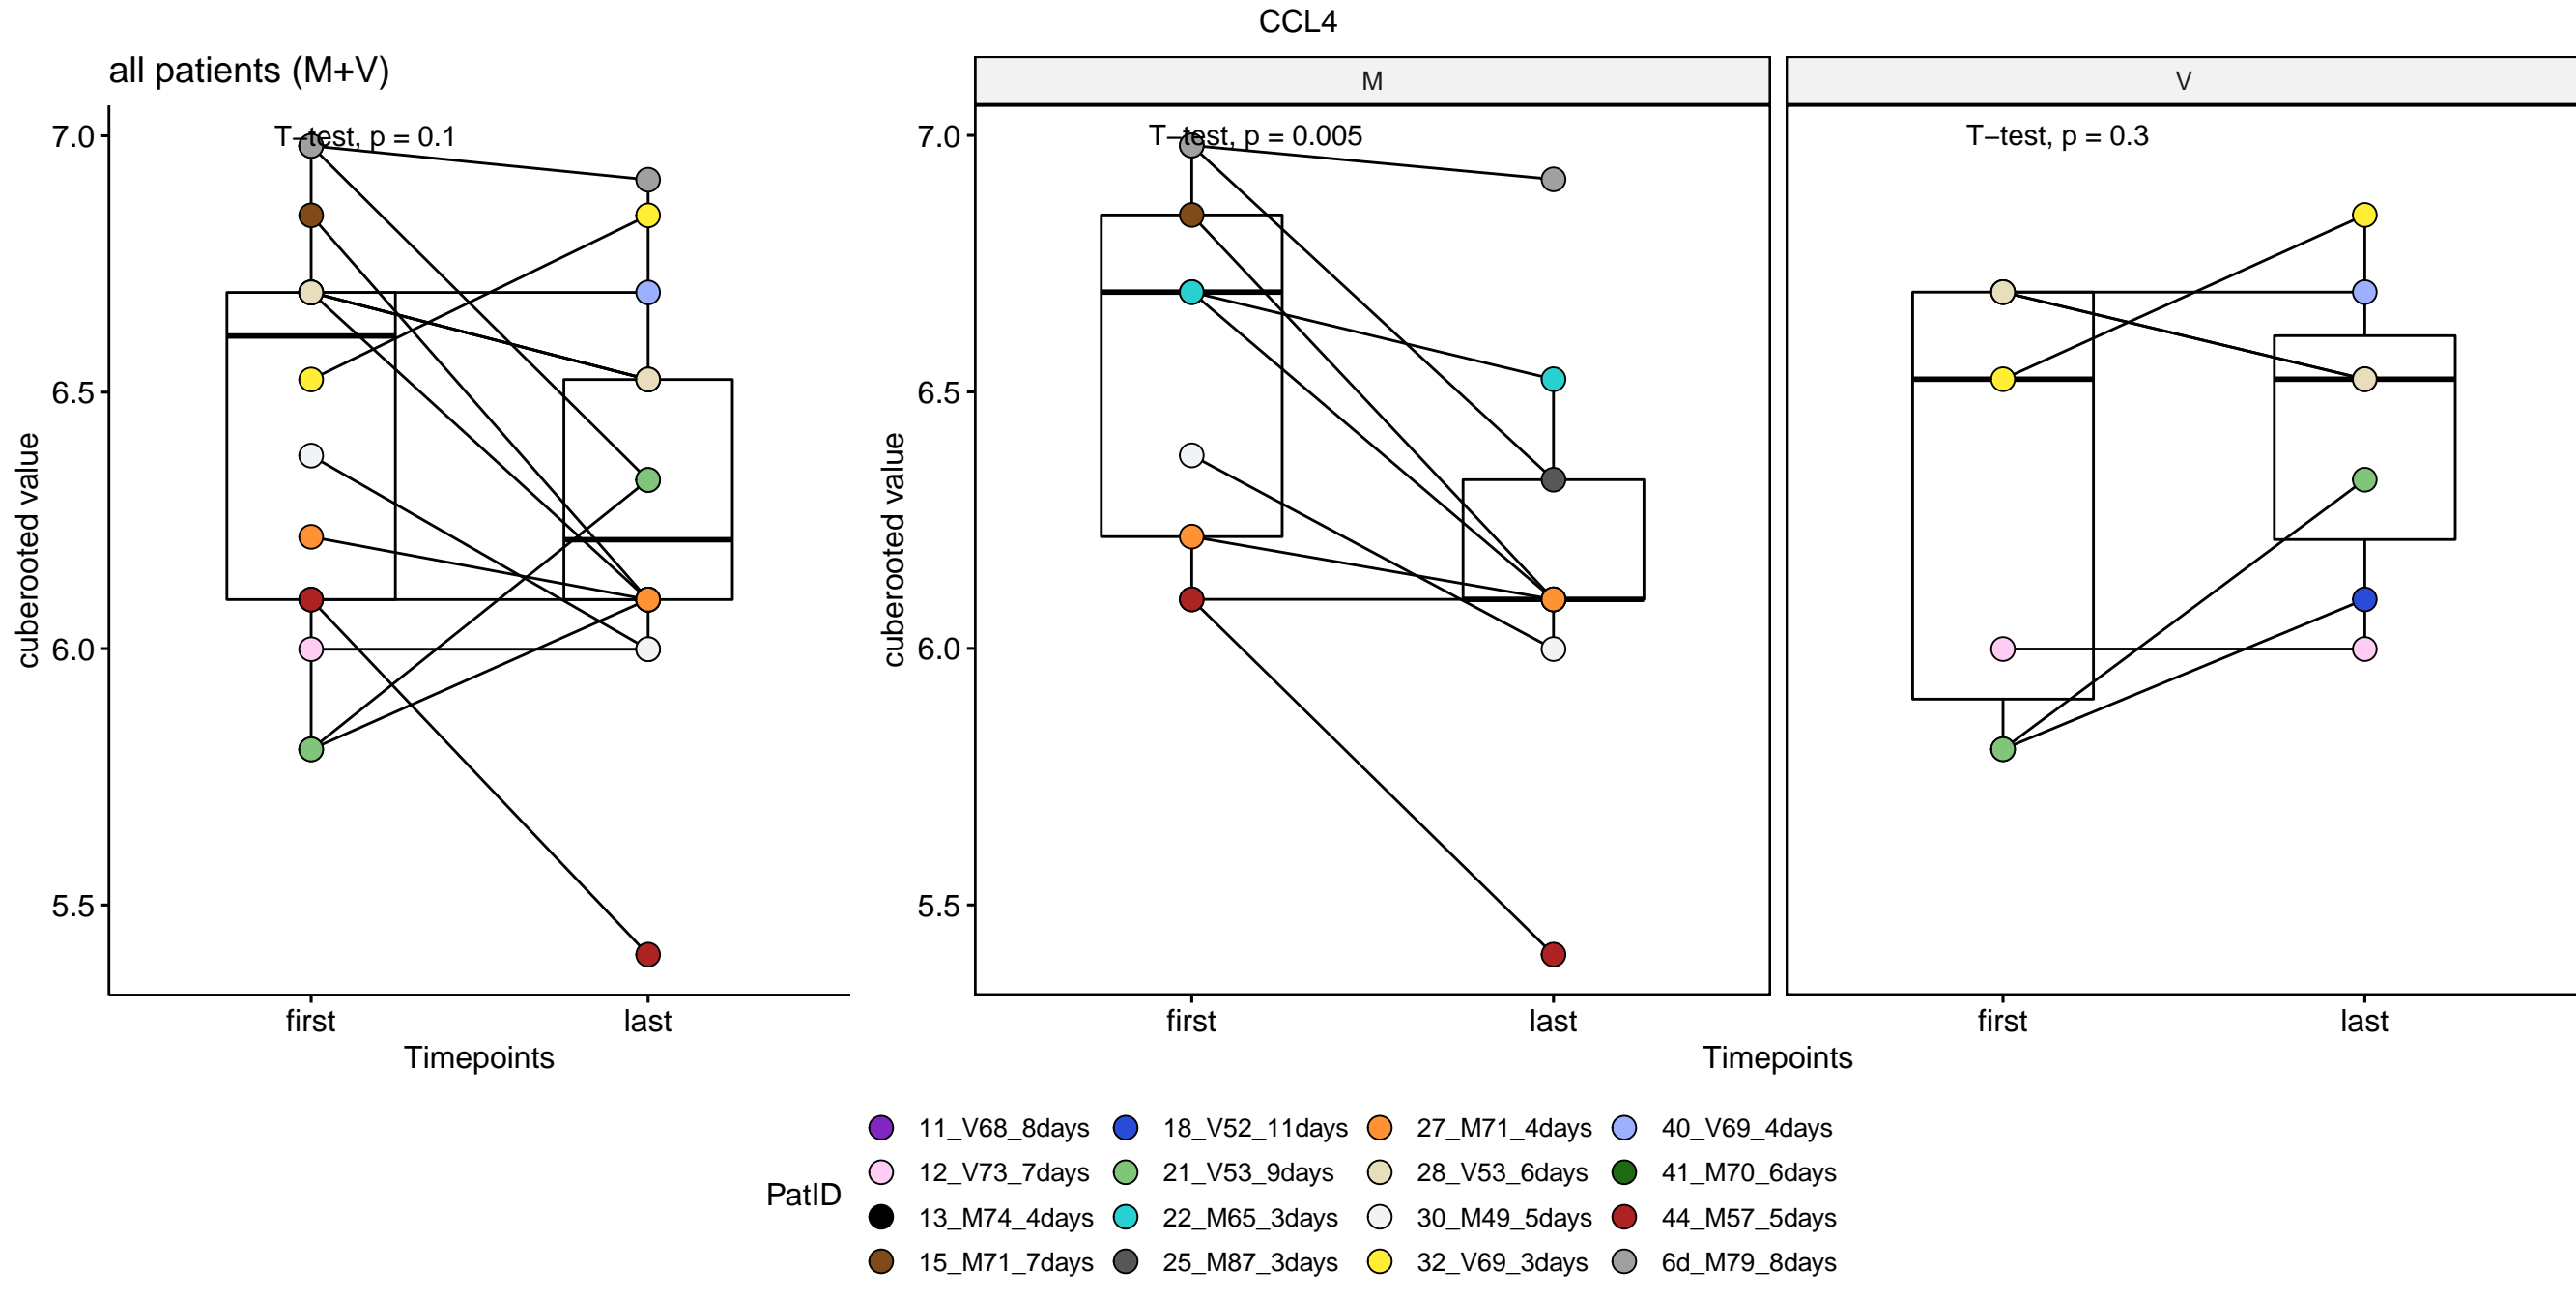

all patients (M+V)

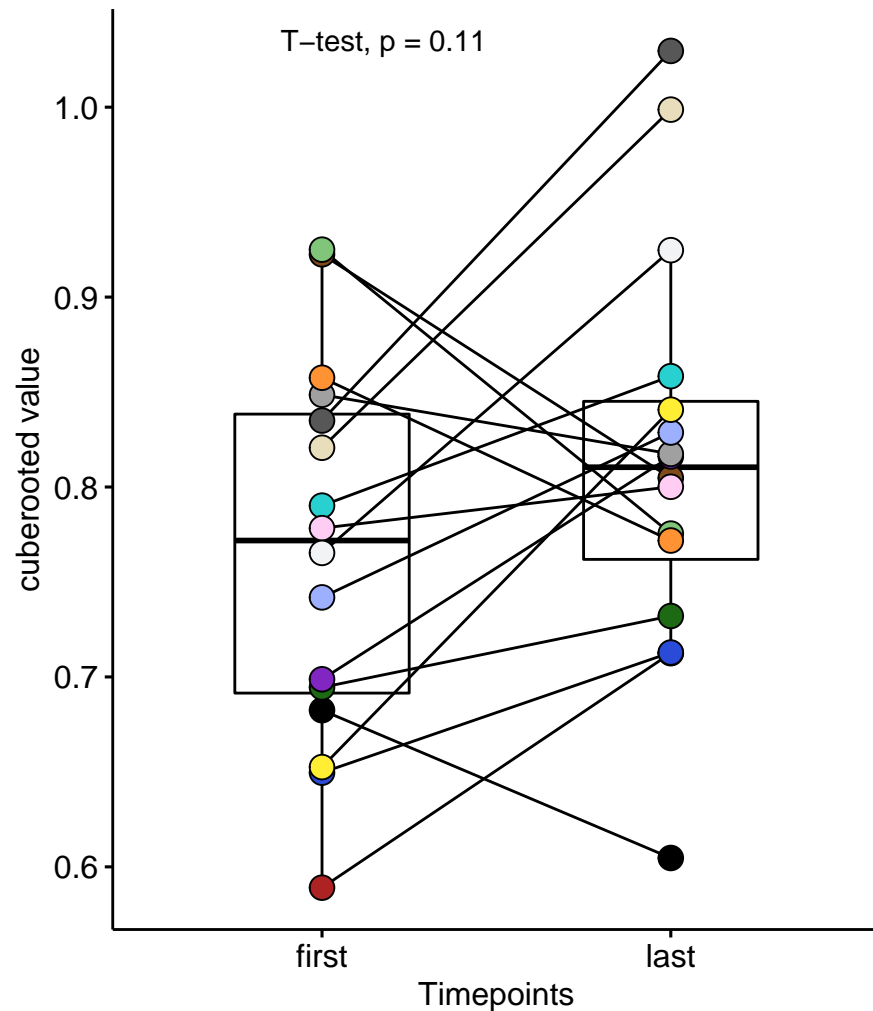

PatID

|              |               |              |              |
|--------------|---------------|--------------|--------------|
| 11_V68_8days | 18_V52_11days | 27_M71_4days | 40_V69_4days |
| 12_V73_7days | 21_V53_9days  | 28_V53_6days | 41_M70_6days |
| 13_M74_4days | 22_M65_3days  | 30_M49_5days | 44_M57_5days |
| 15_M71_7days | 25_M87_3days  | 32_V69_3days | 6d_M79_8days |

M

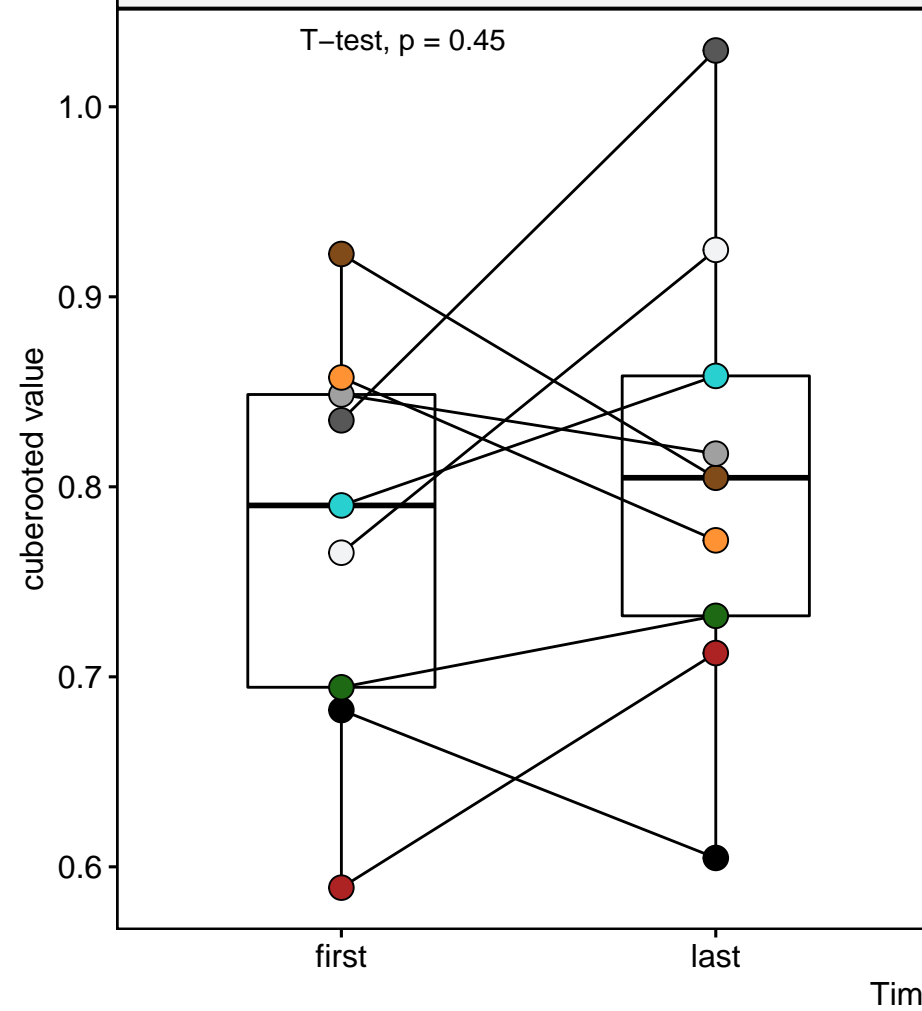

V

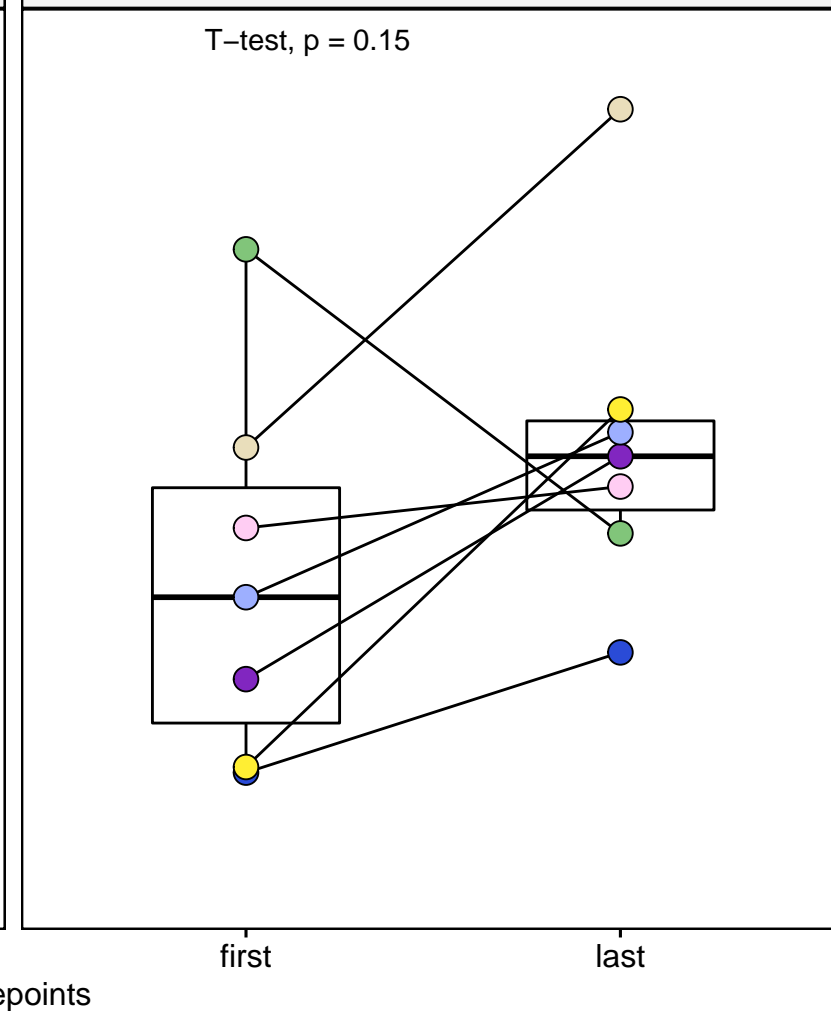

# L.Kynurenine\_amines

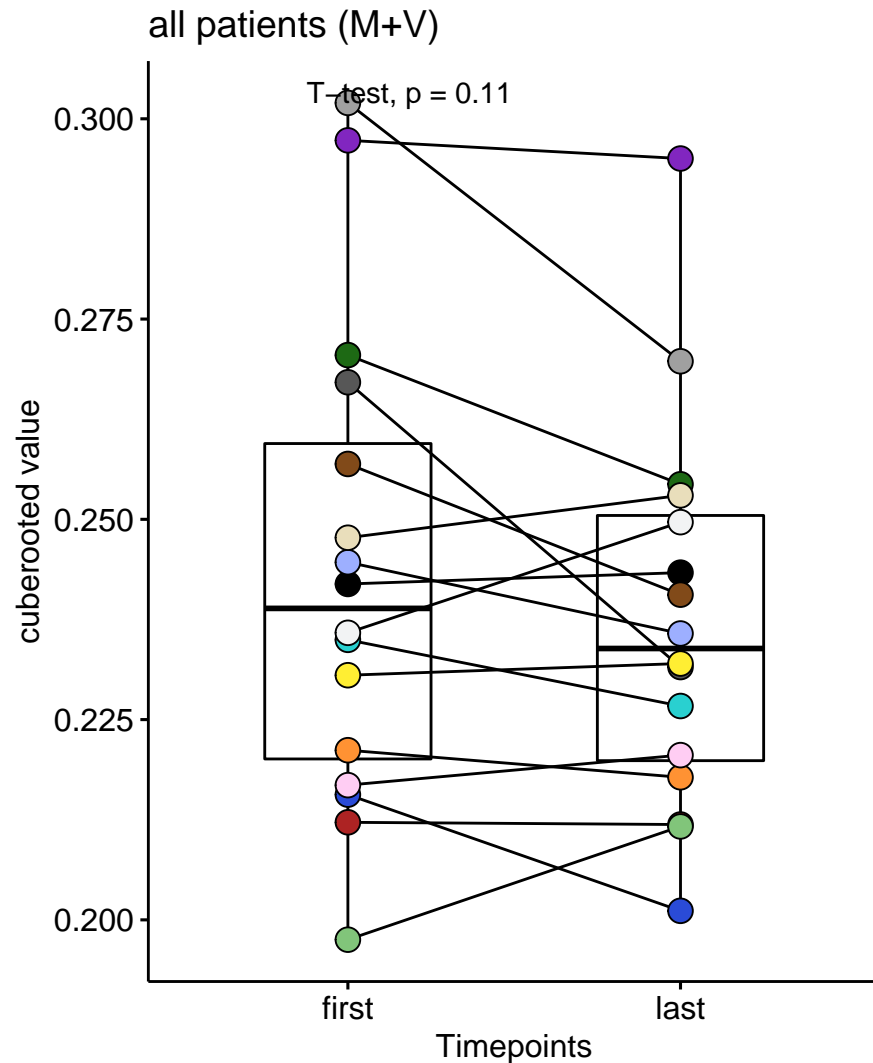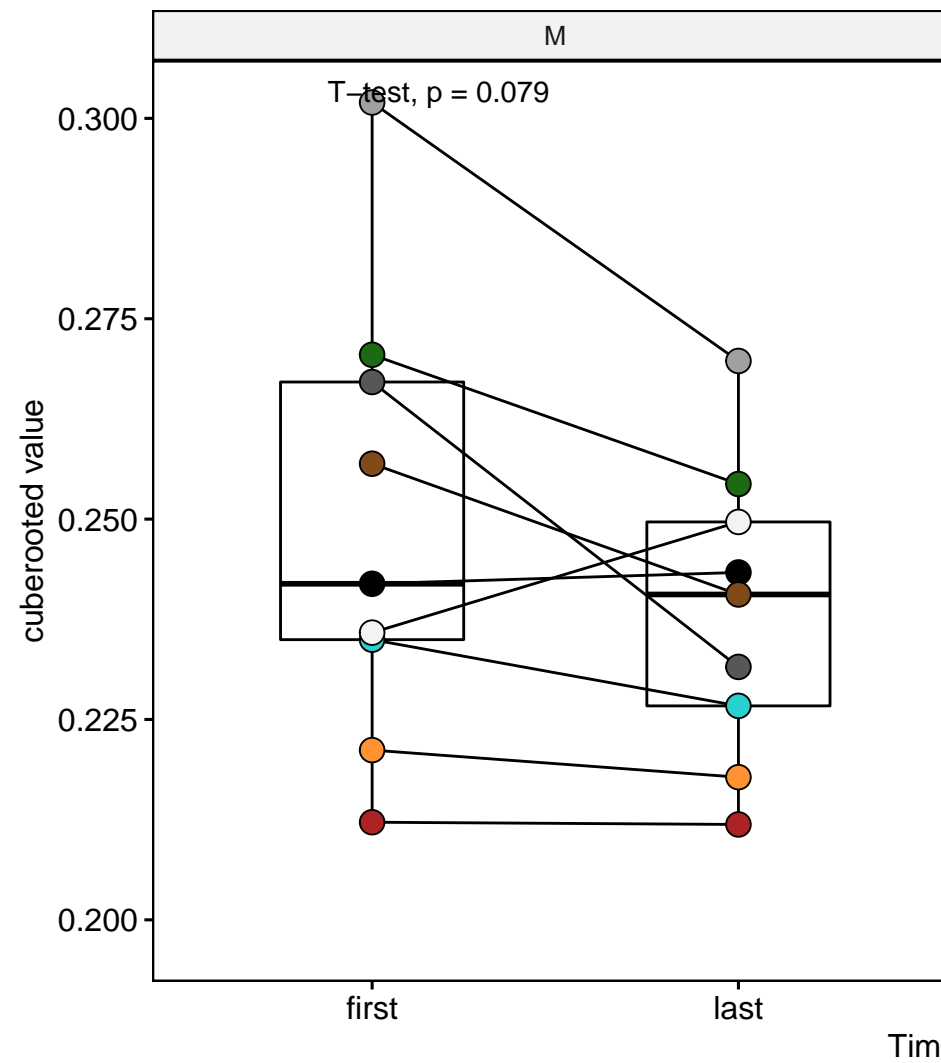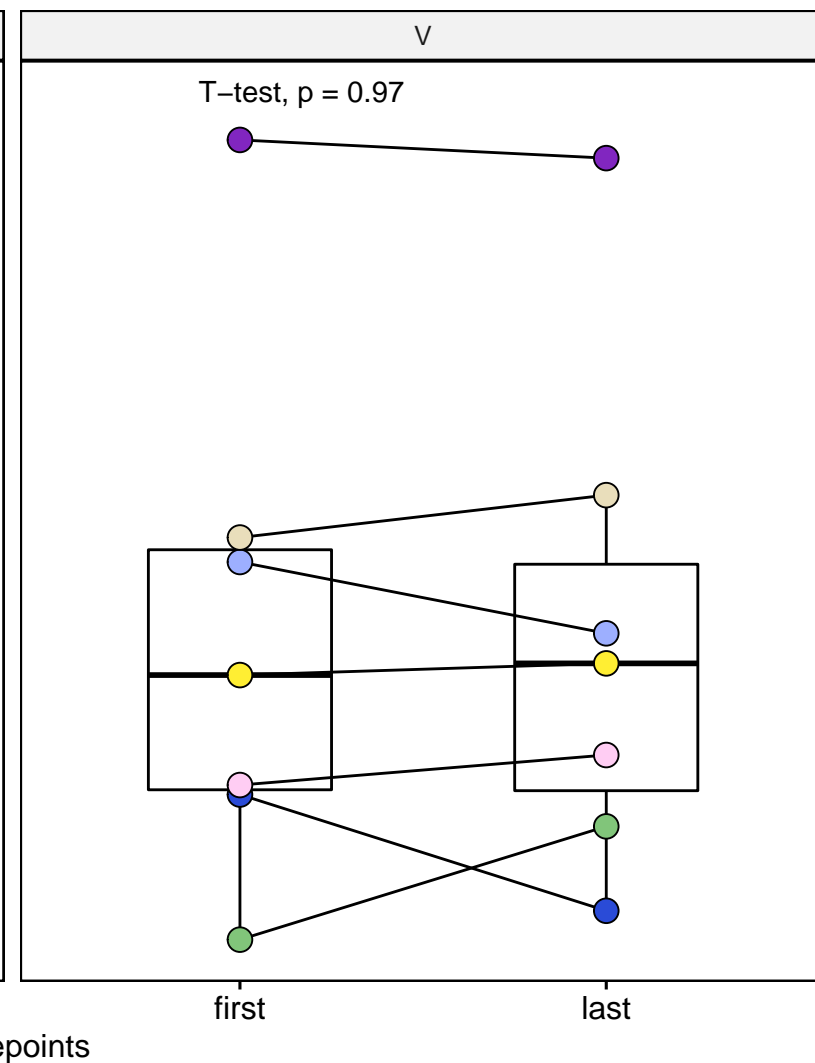

# X4OHLys\_Lys

all patients (M+V)

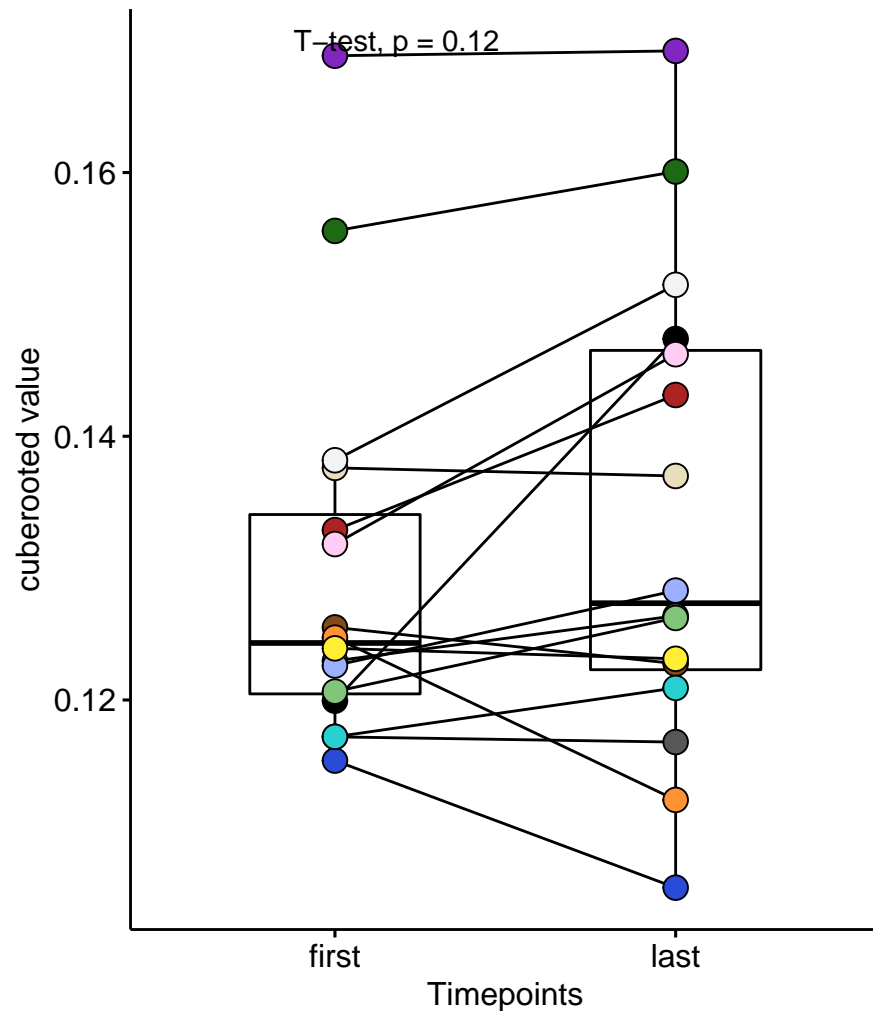

- PatID
- |              |               |              |              |
|--------------|---------------|--------------|--------------|
| 11_V68_8days | 18_V52_11days | 27_M71_4days | 40_V69_4days |
| 12_V73_7days | 21_V53_9days  | 28_V53_6days | 41_M70_6days |
| 13_M74_4days | 22_M65_3days  | 30_M49_5days | 44_M57_5days |
| 15_M71_7days | 25_M87_3days  | 32_V69_3days | 6d_M79_8days |

M

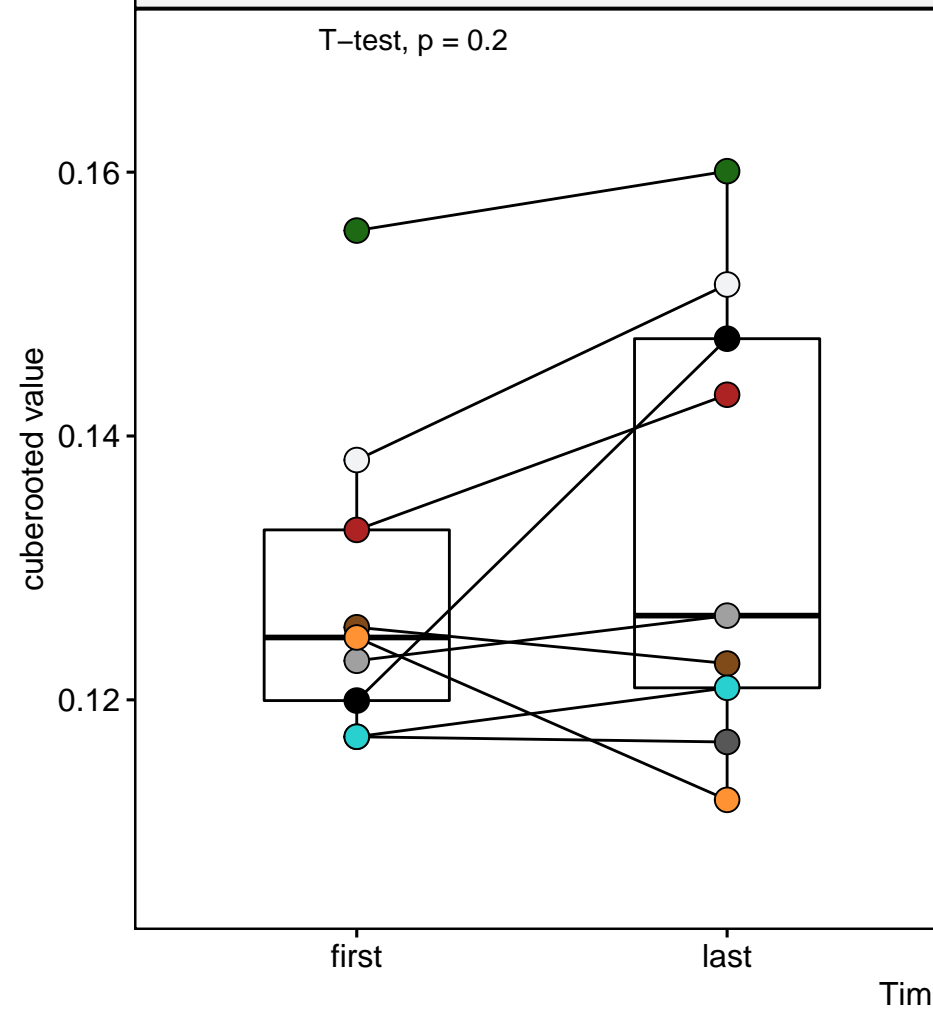

V

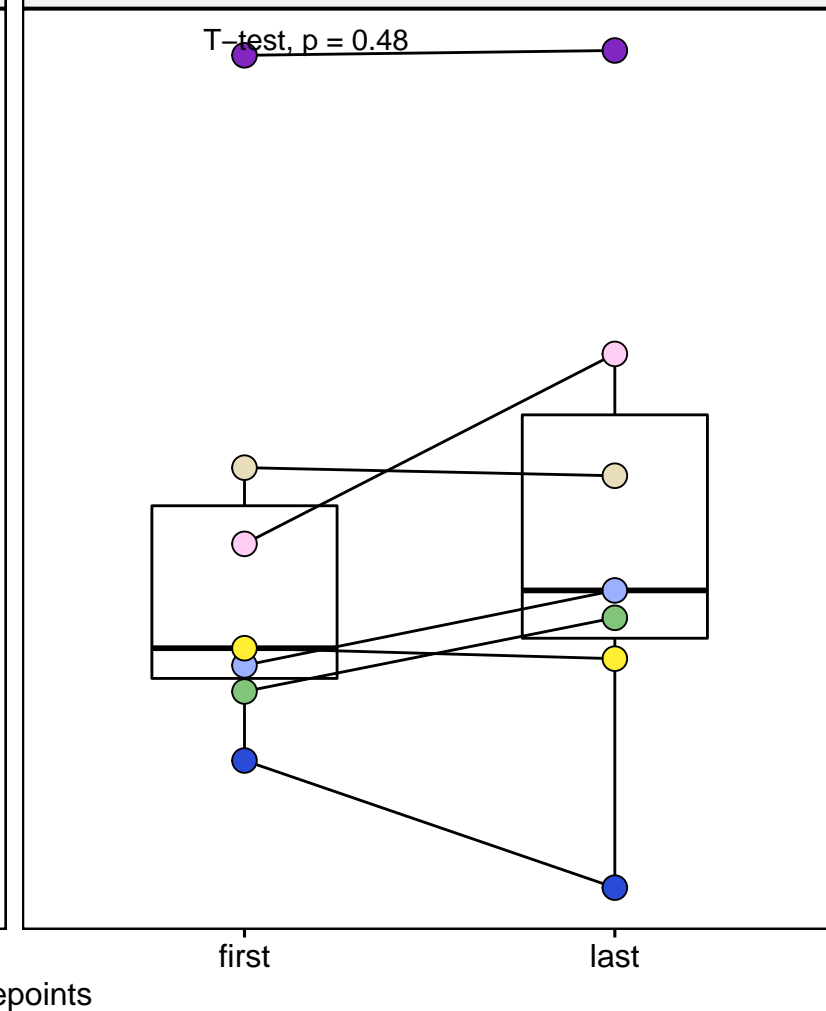

# Kyn\_Trp

all patients (M+V)

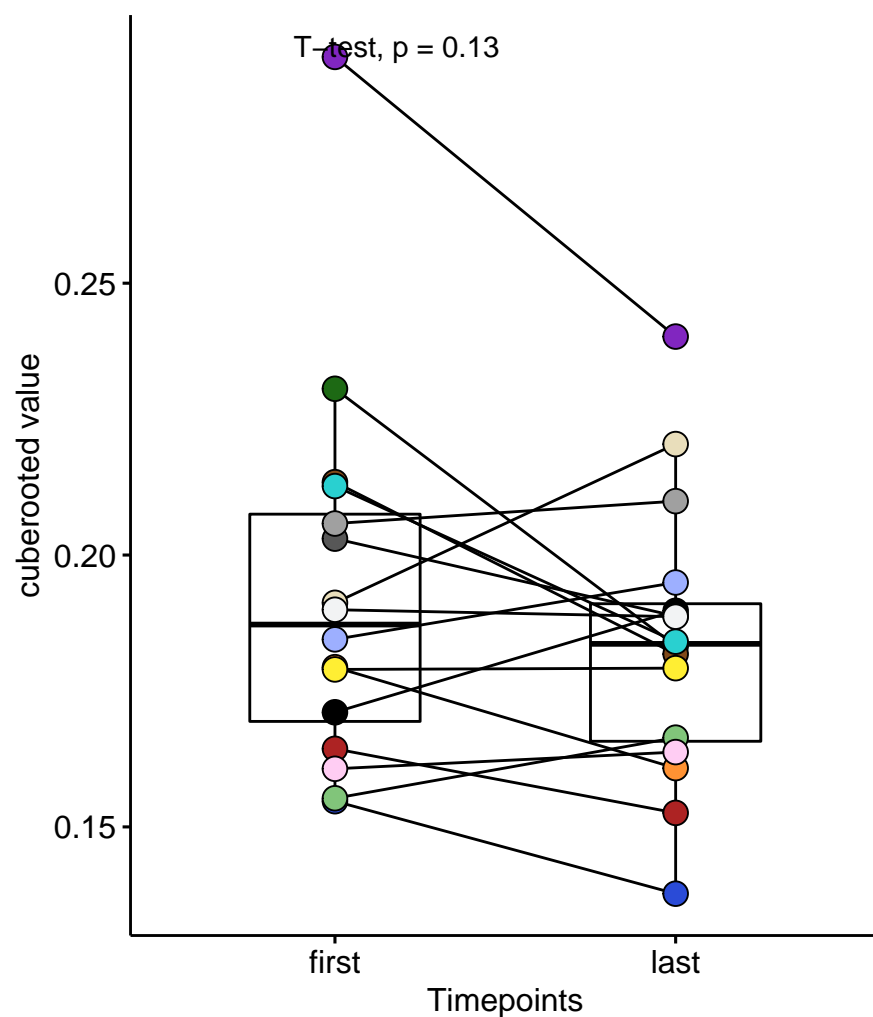

M

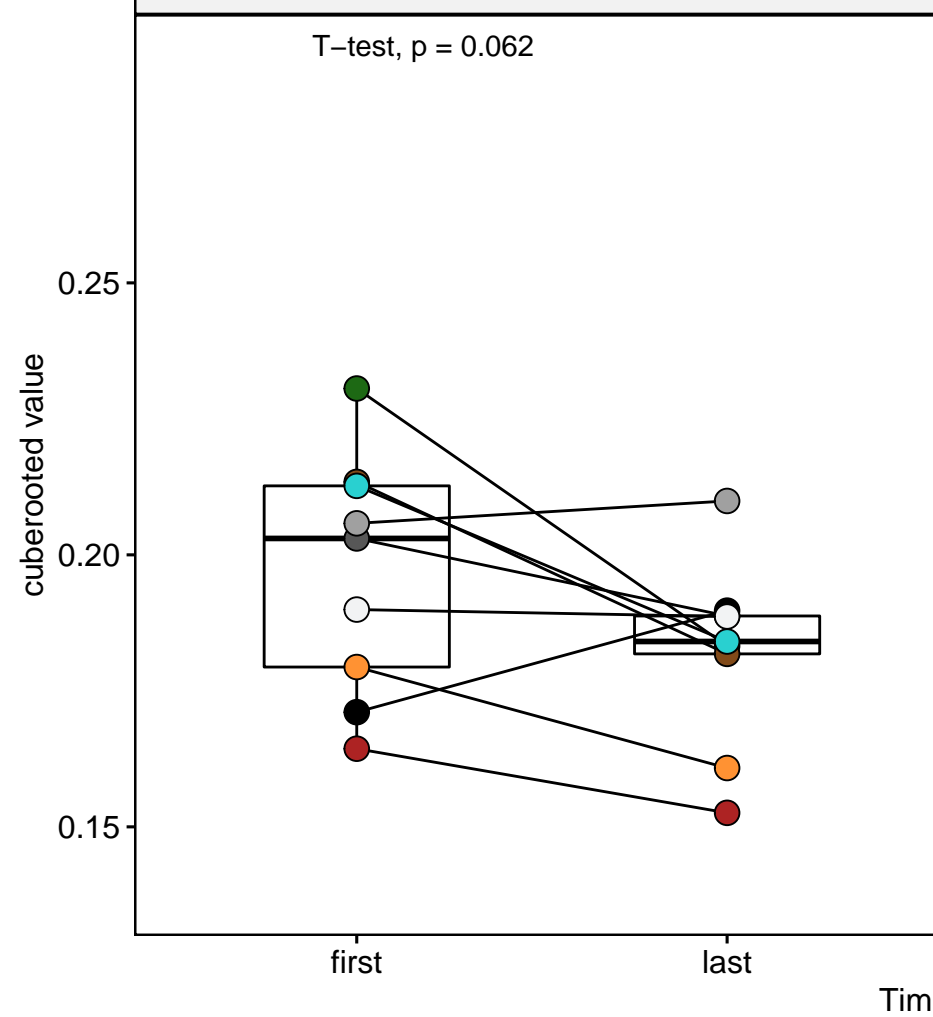

V

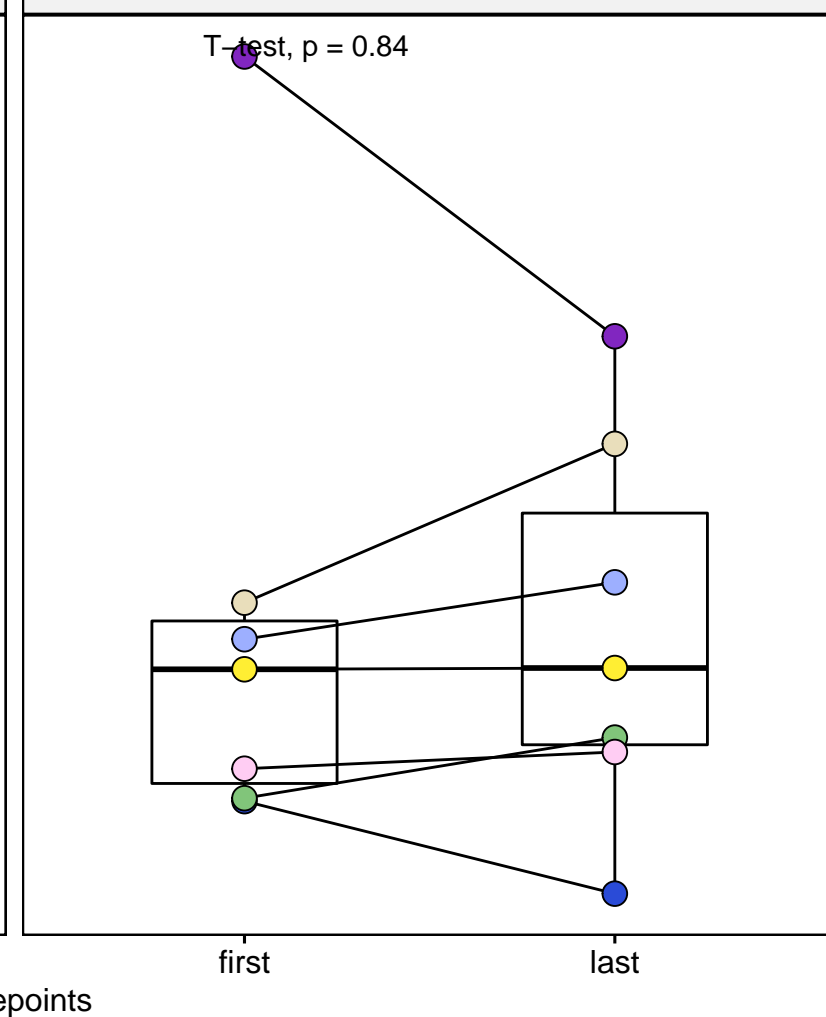



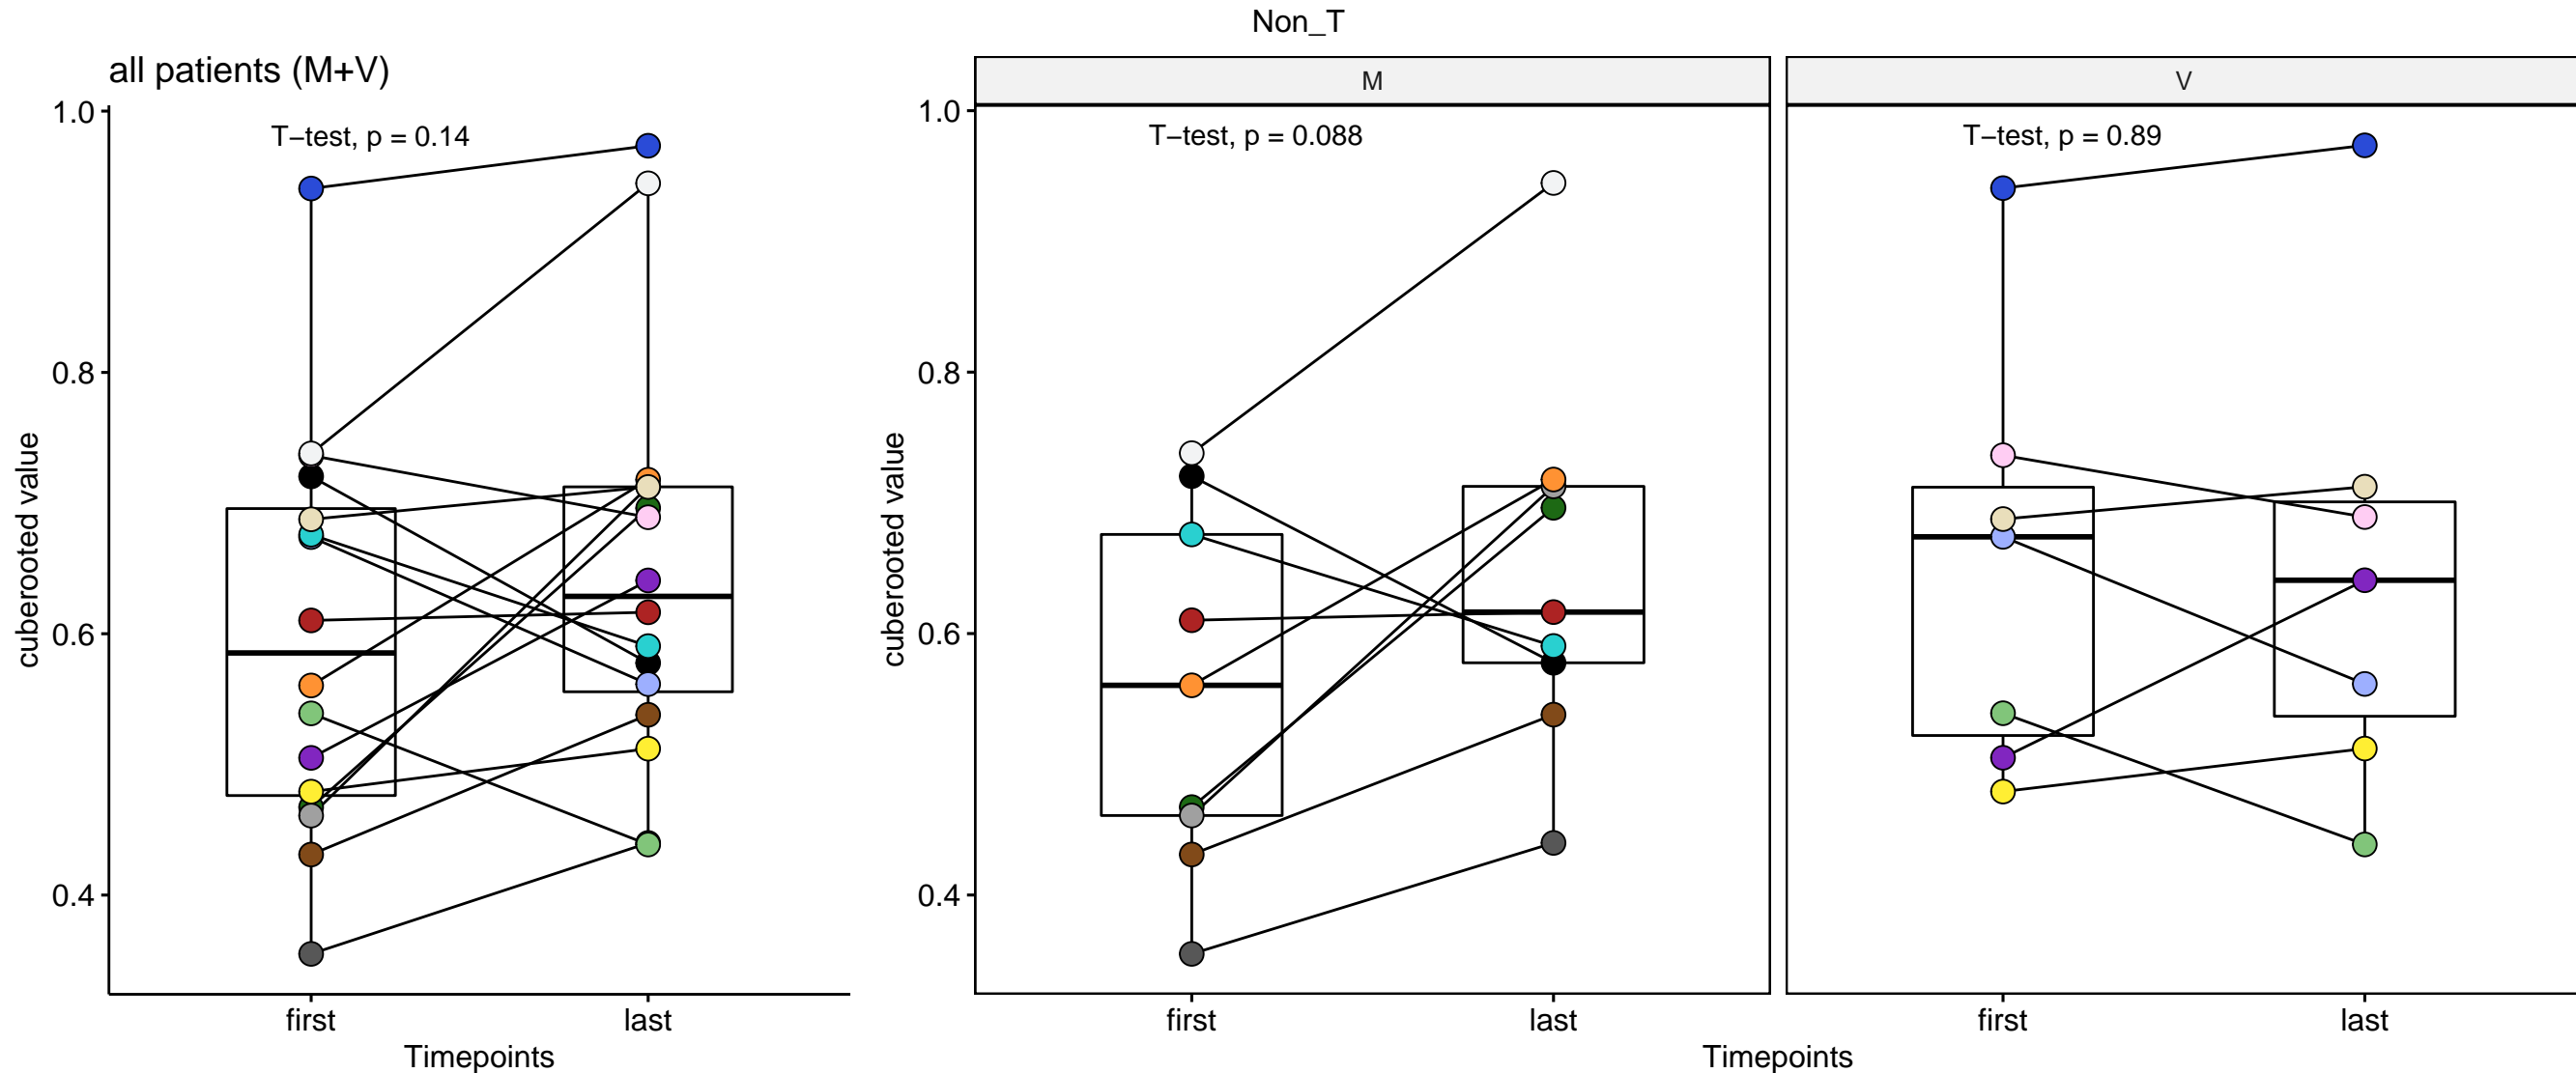

PatID

|              |               |              |              |
|--------------|---------------|--------------|--------------|
| 11_V68_8days | 18_V52_11days | 27_M71_4days | 40_V69_4days |
| 12_V73_7days | 21_V53_9days  | 28_V53_6days | 41_M70_6days |
| 13_M74_4days | 22_M65_3days  | 30_M49_5days | 44_M57_5days |
| 15_M71_7days | 25_M87_3days  | 32_V69_3days | 6d_M79_8days |

all patients (M+V)

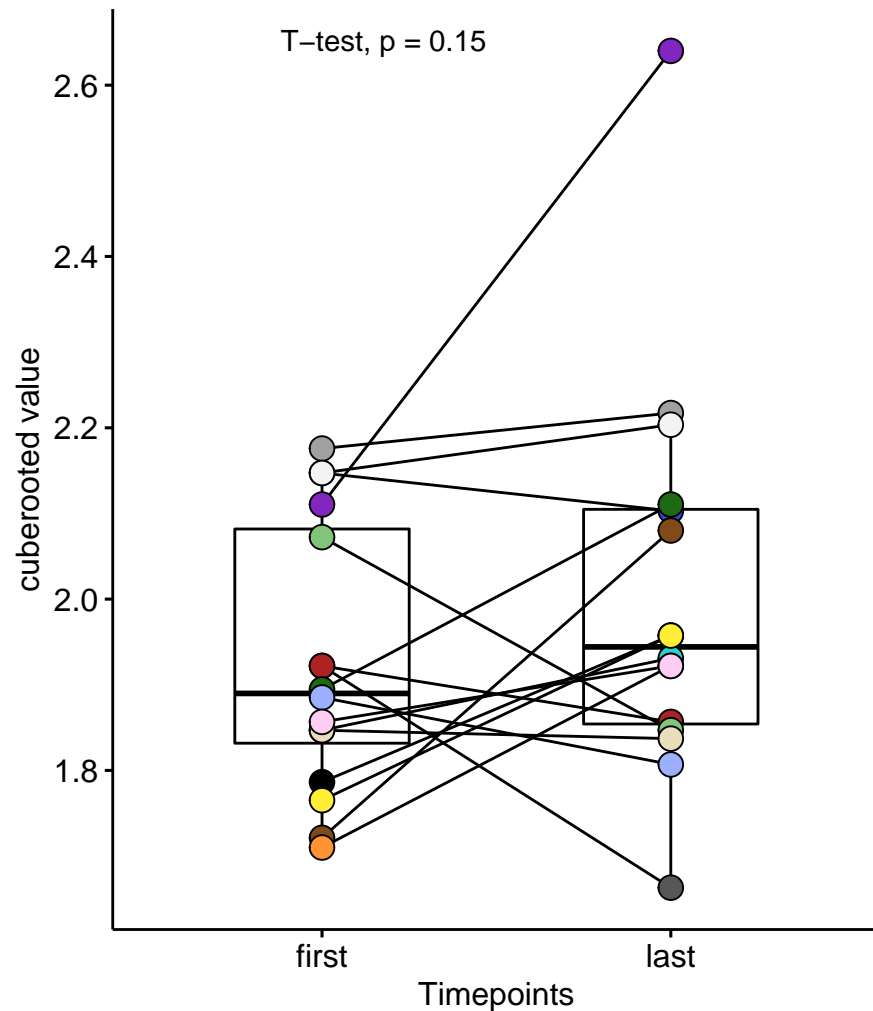

Leukocytes

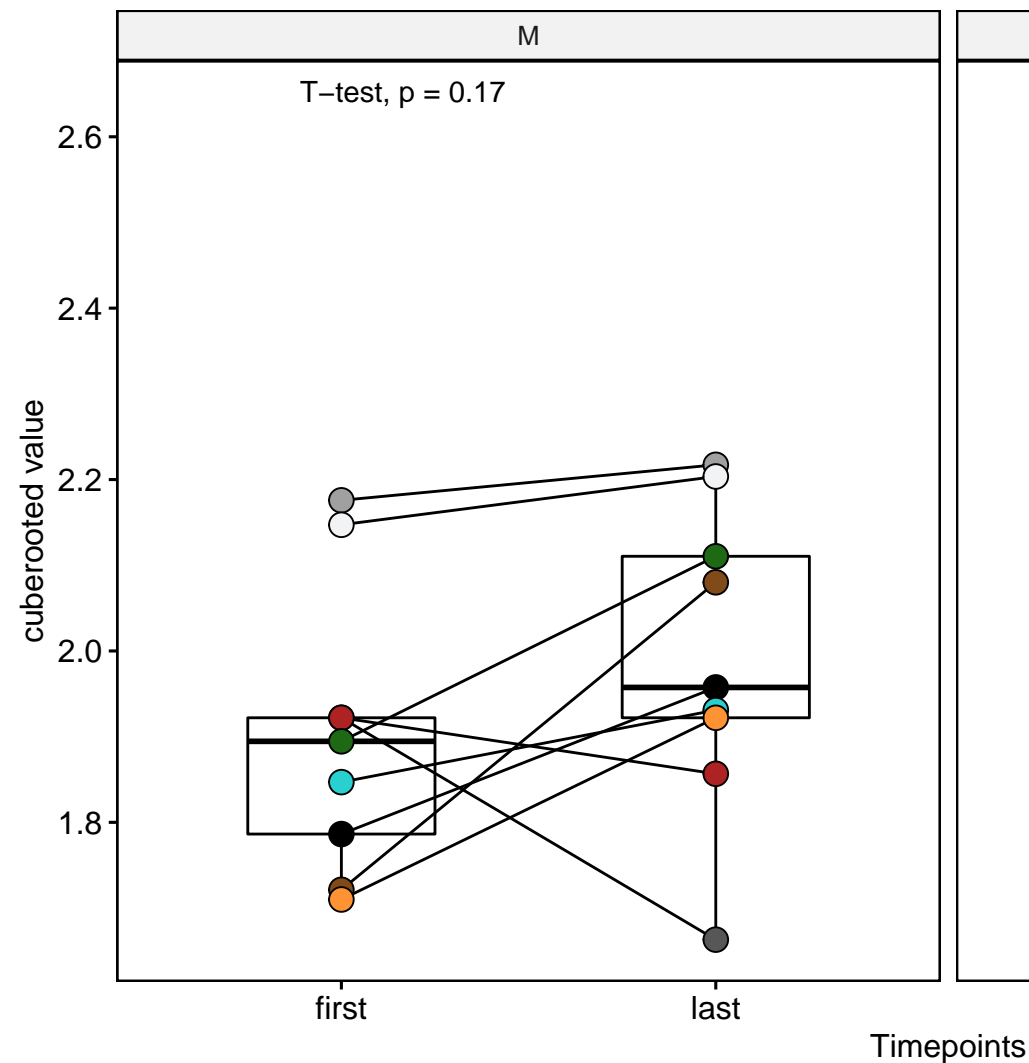

V

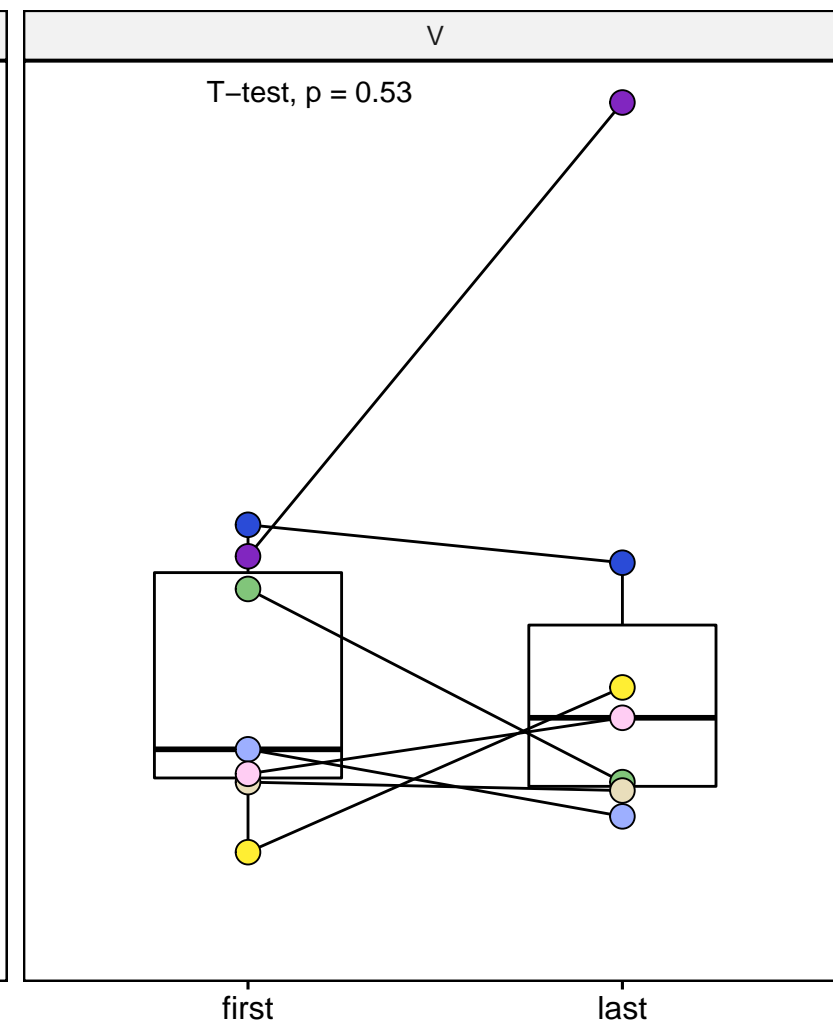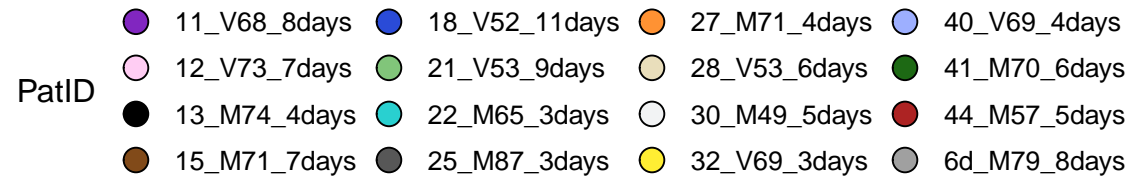

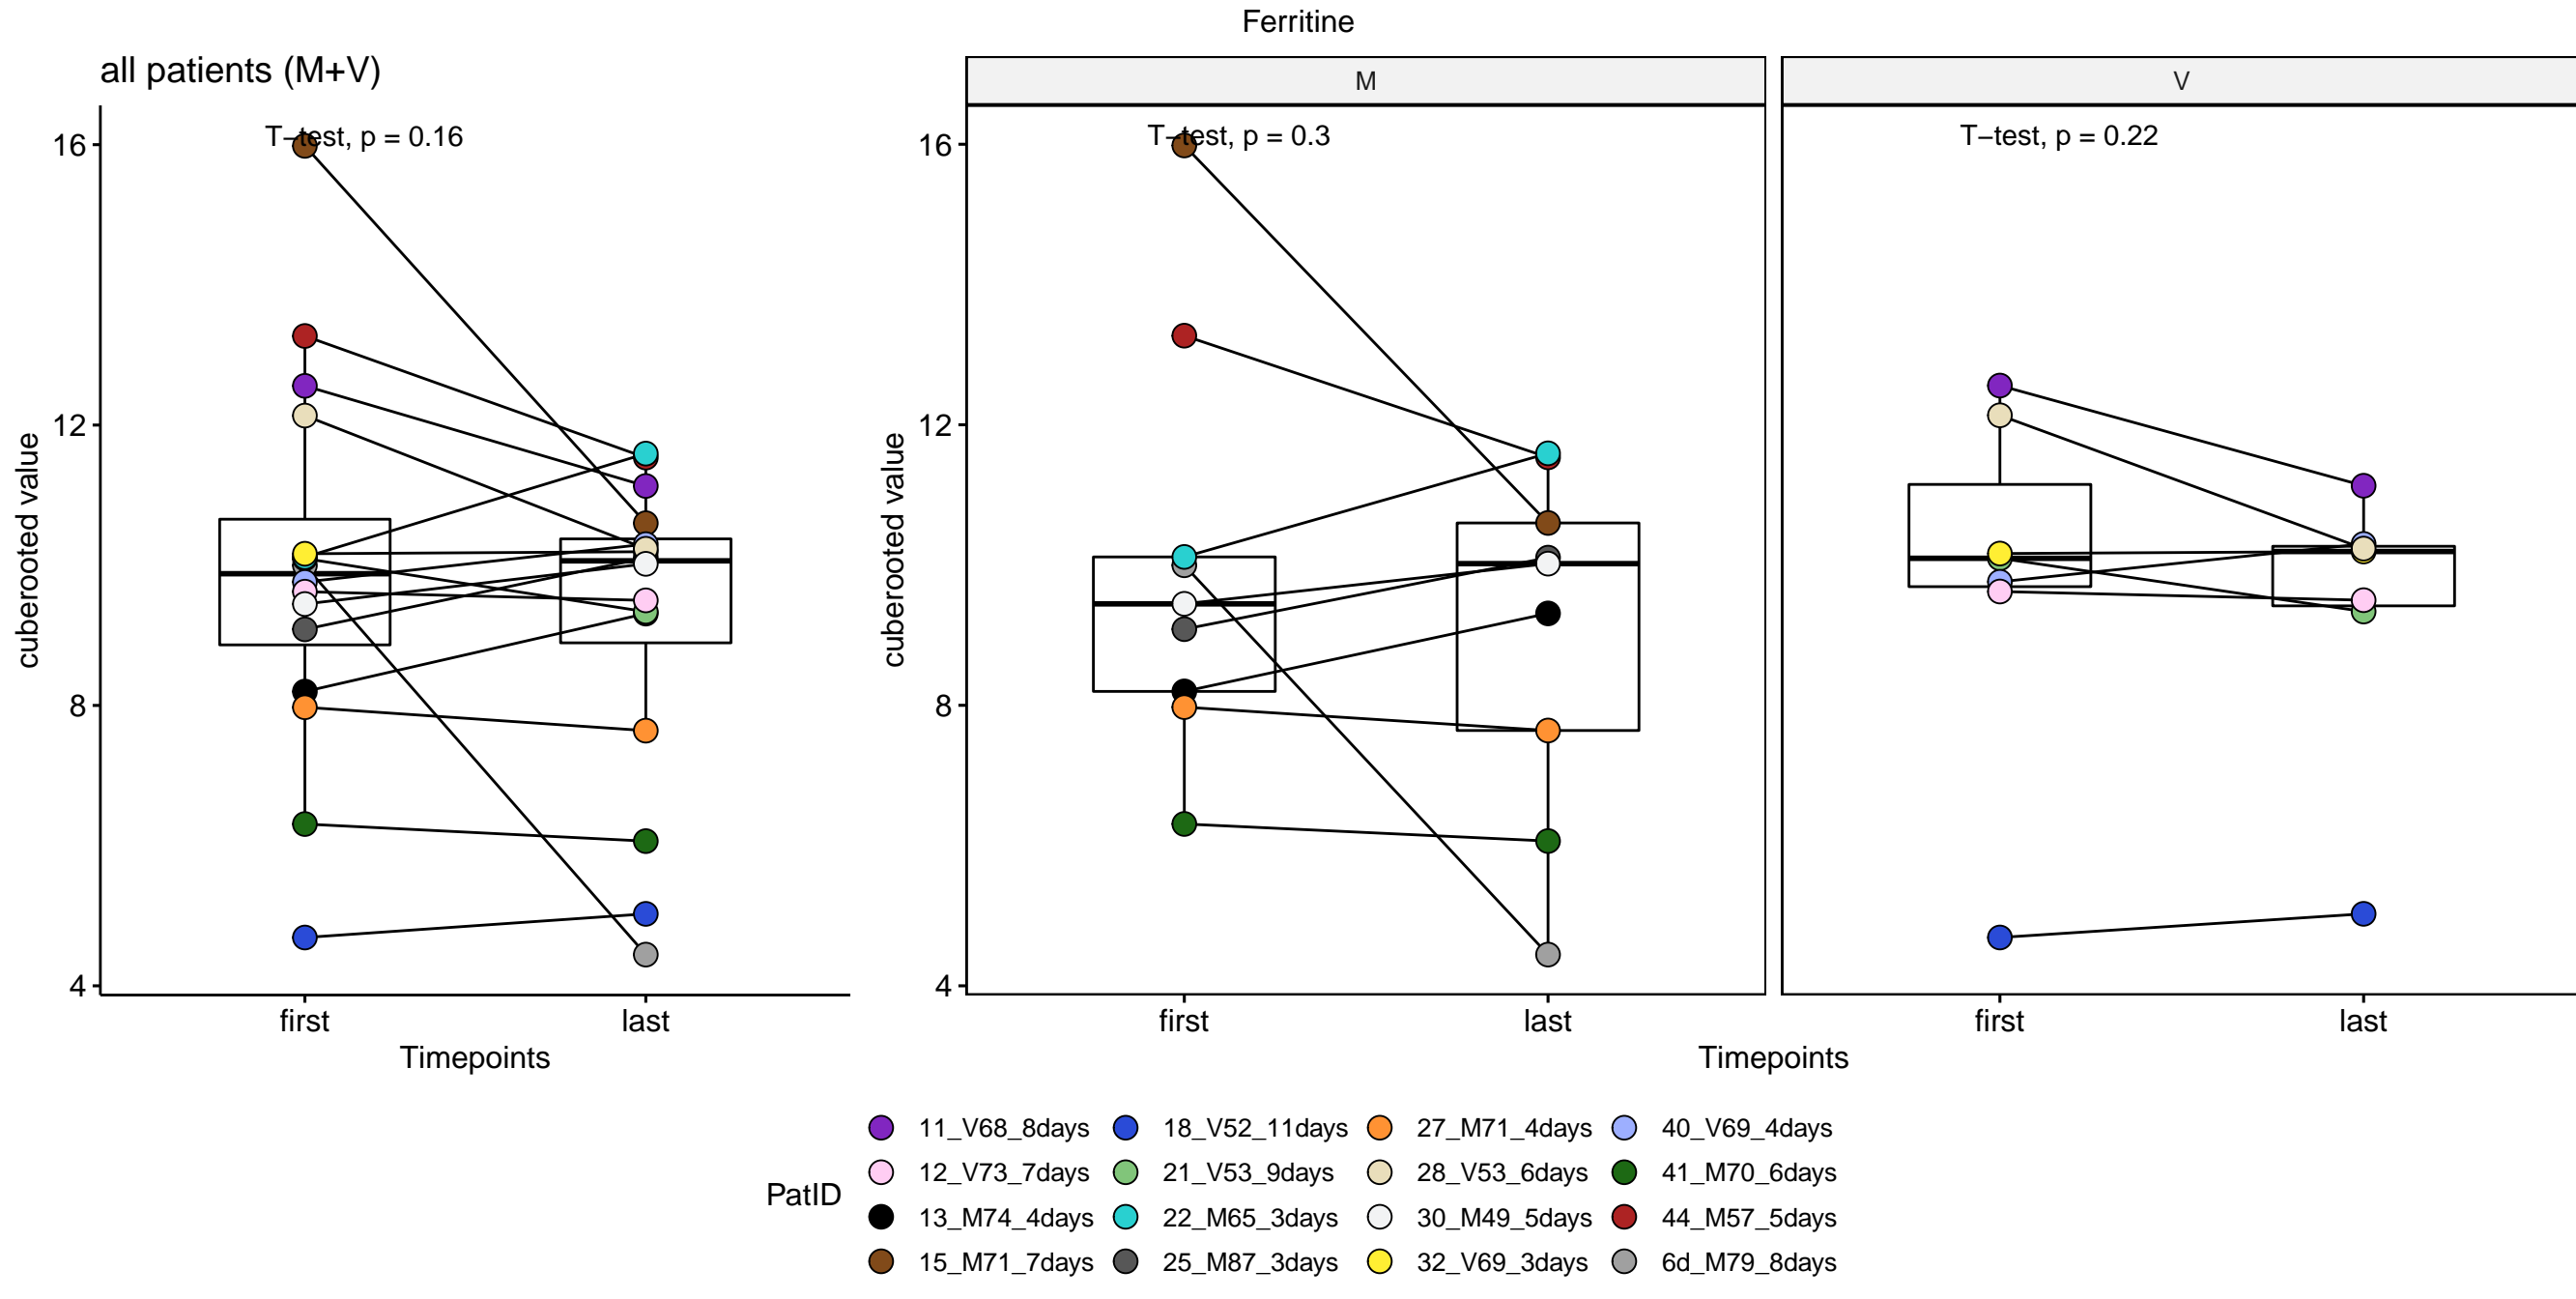

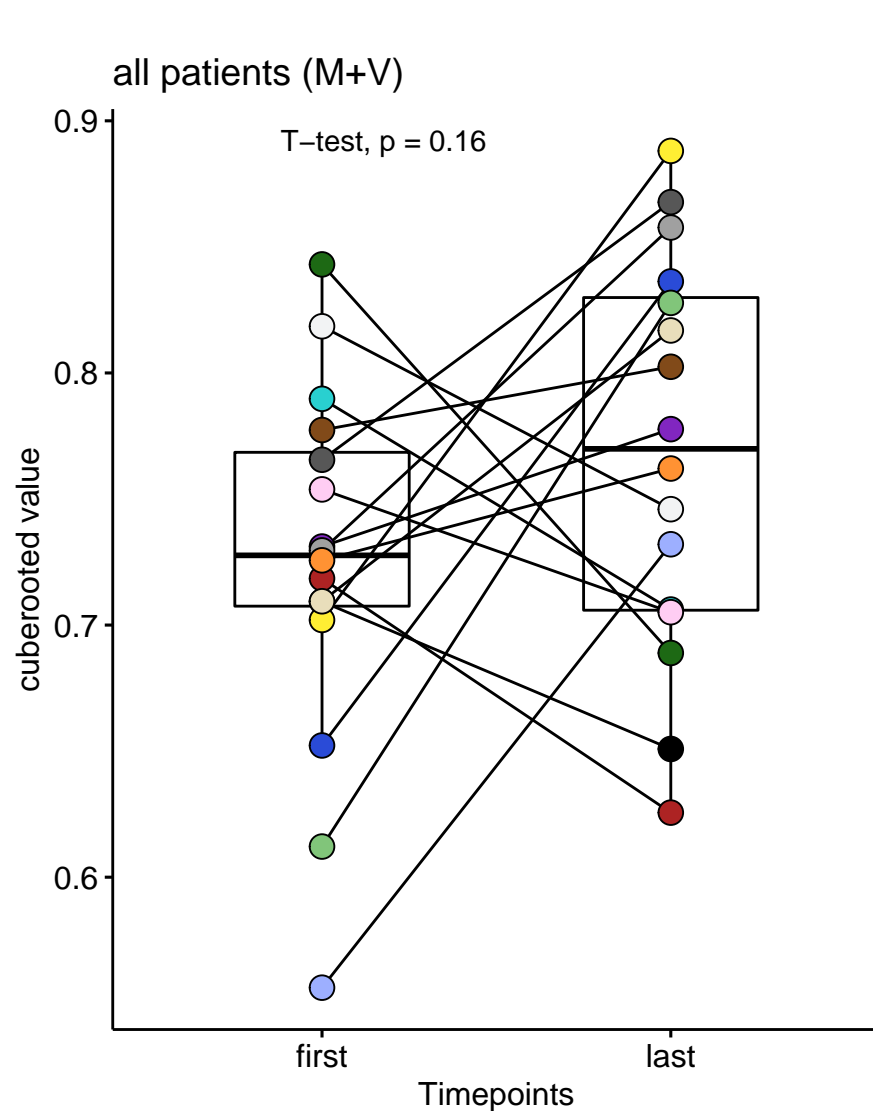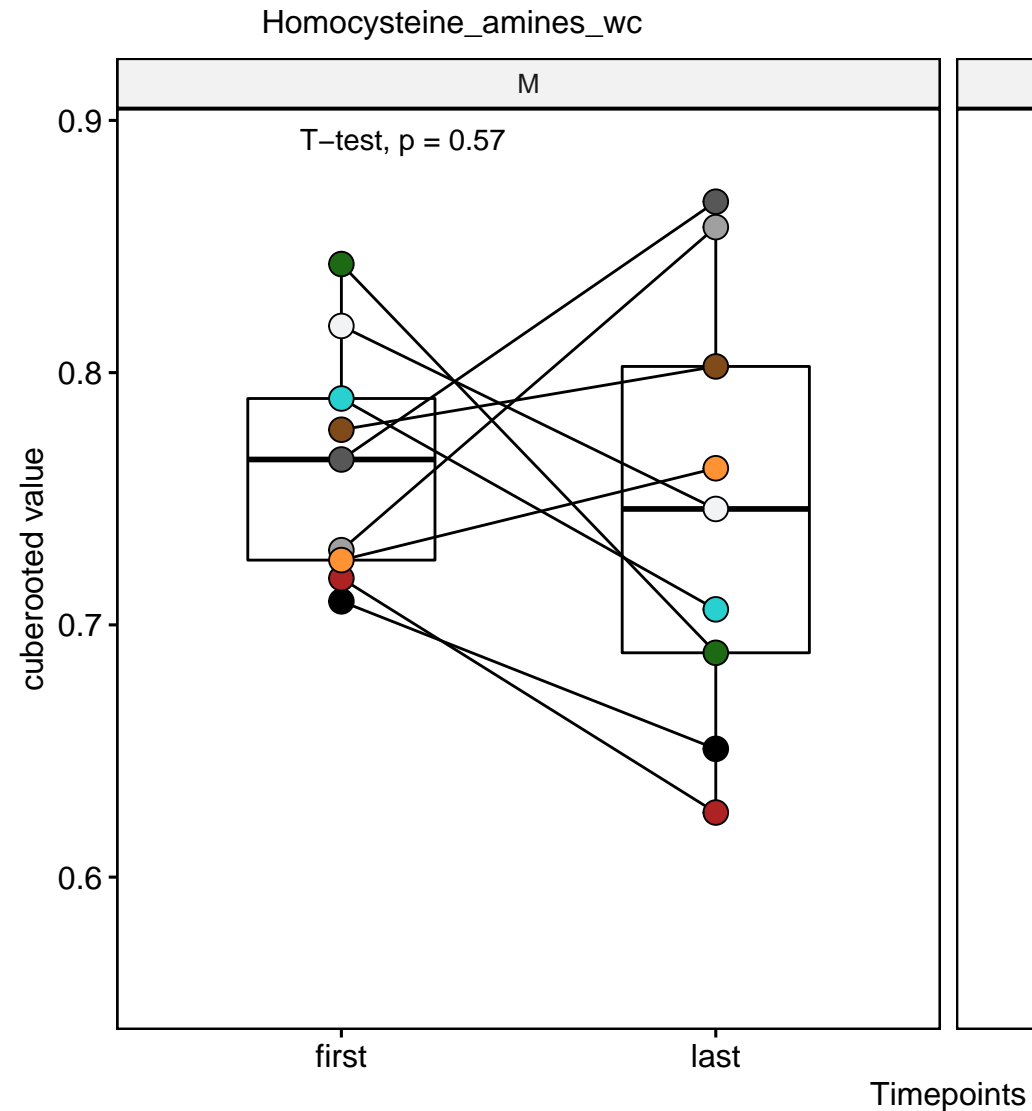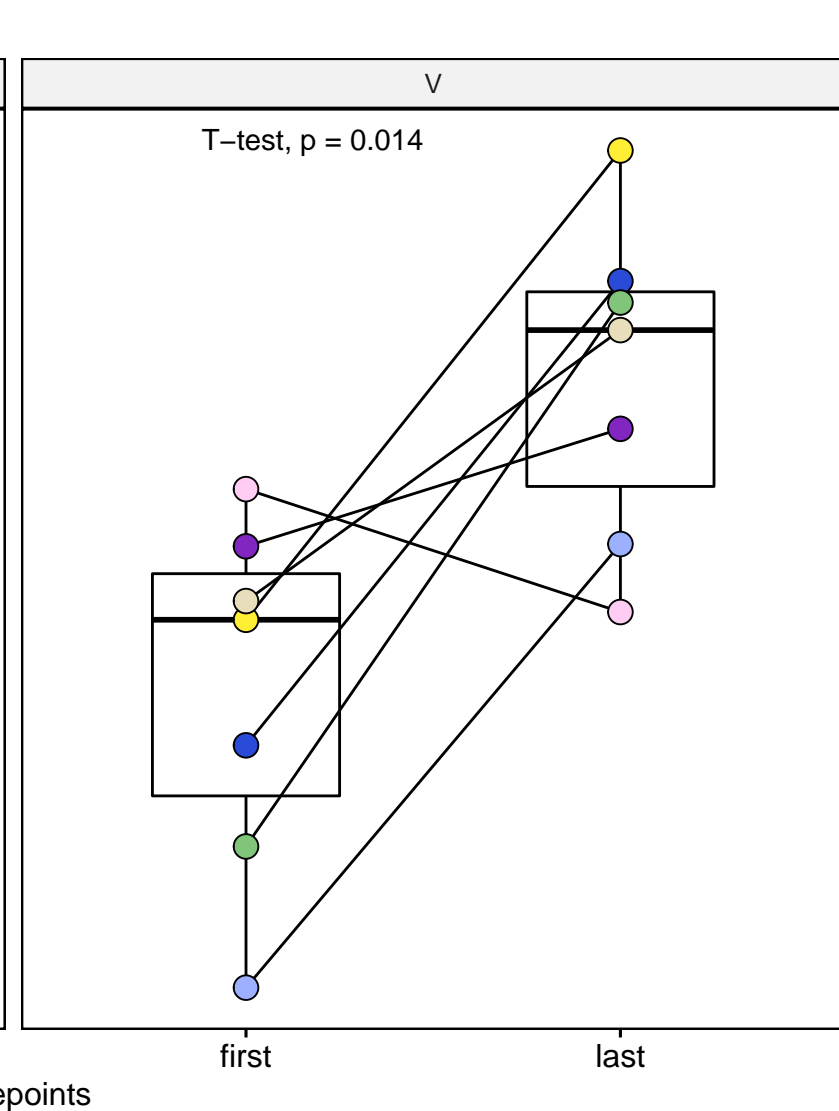

PatID

|              |               |              |              |
|--------------|---------------|--------------|--------------|
| 11_V68_8days | 18_V52_11days | 27_M71_4days | 40_V69_4days |
| 12_V73_7days | 21_V53_9days  | 28_V53_6days | 41_M70_6days |
| 13_M74_4days | 22_M65_3days  | 30_M49_5days | 44_M57_5days |
| 15_M71_7days | 25_M87_3days  | 32_V69_3days | 6d_M79_8days |

all patients (M+V)

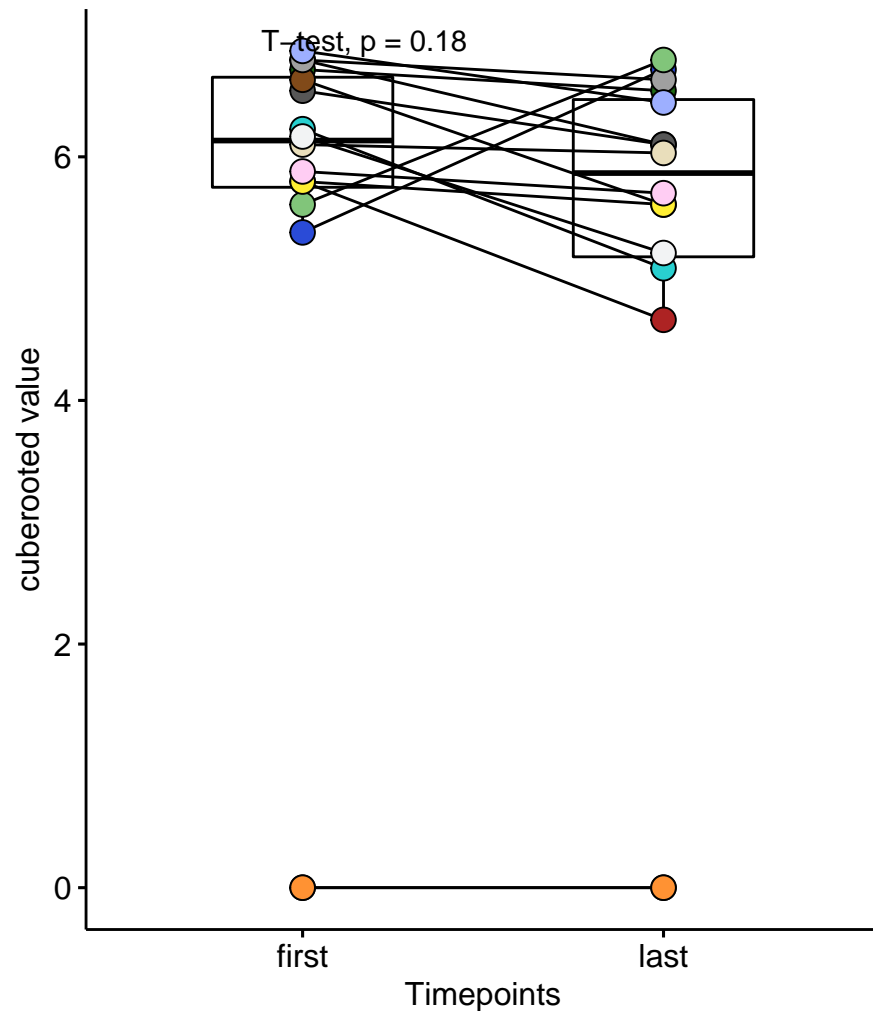

CCL3

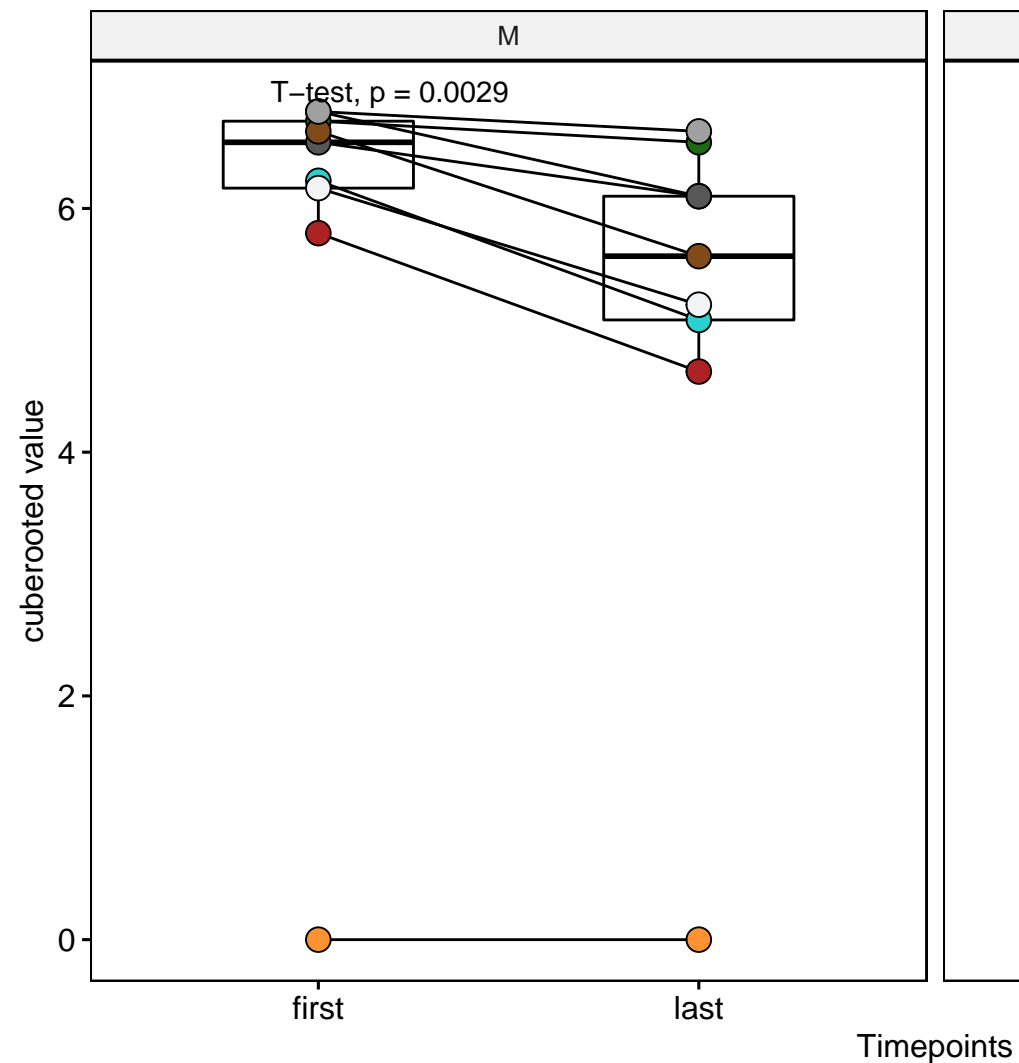

V

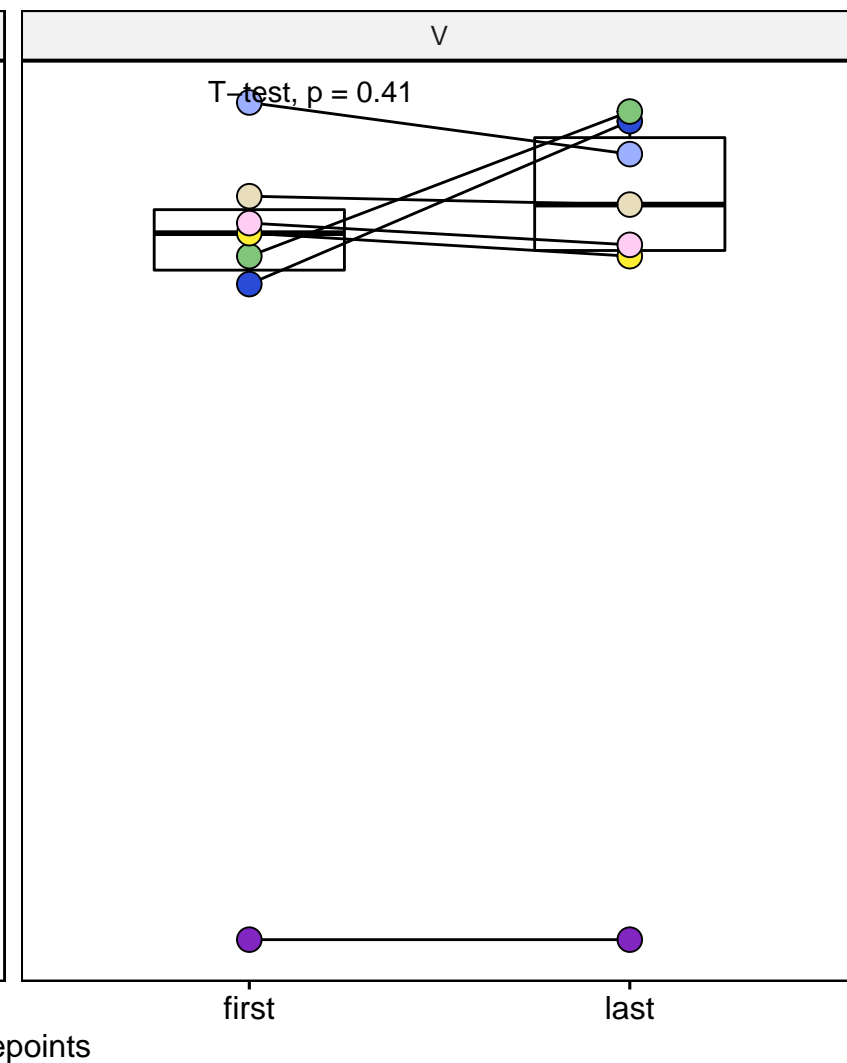

# B\_cells

all patients (M+V)

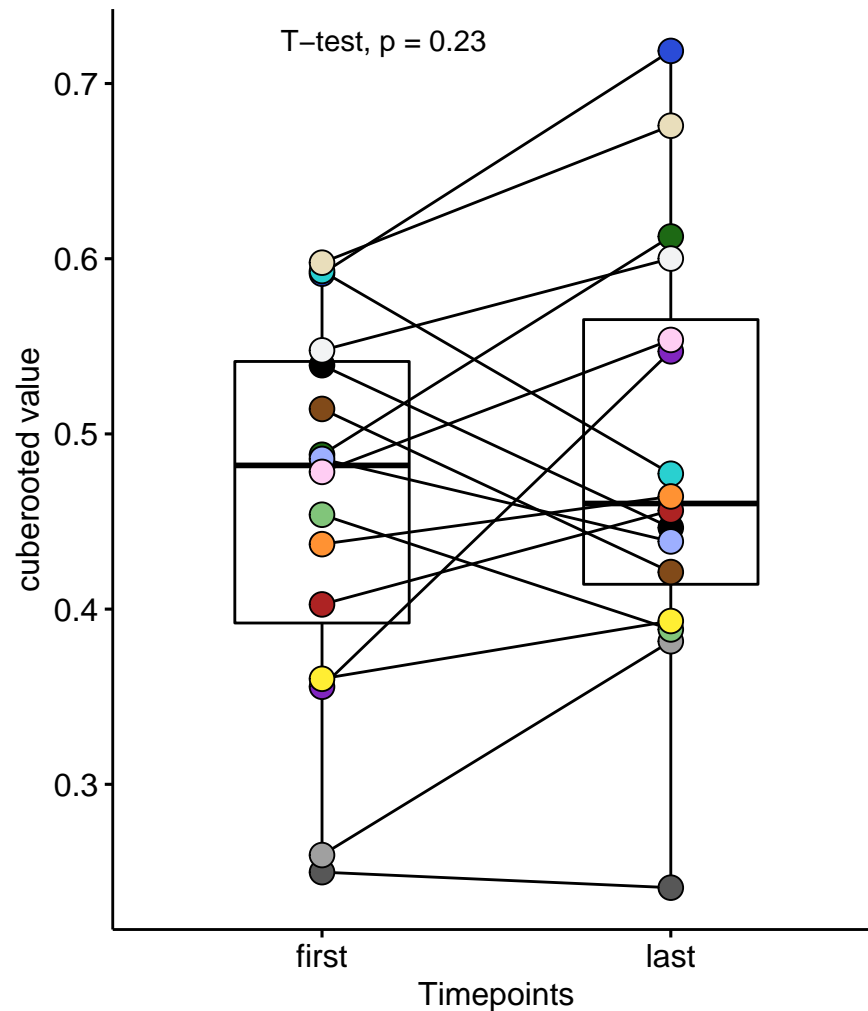

M

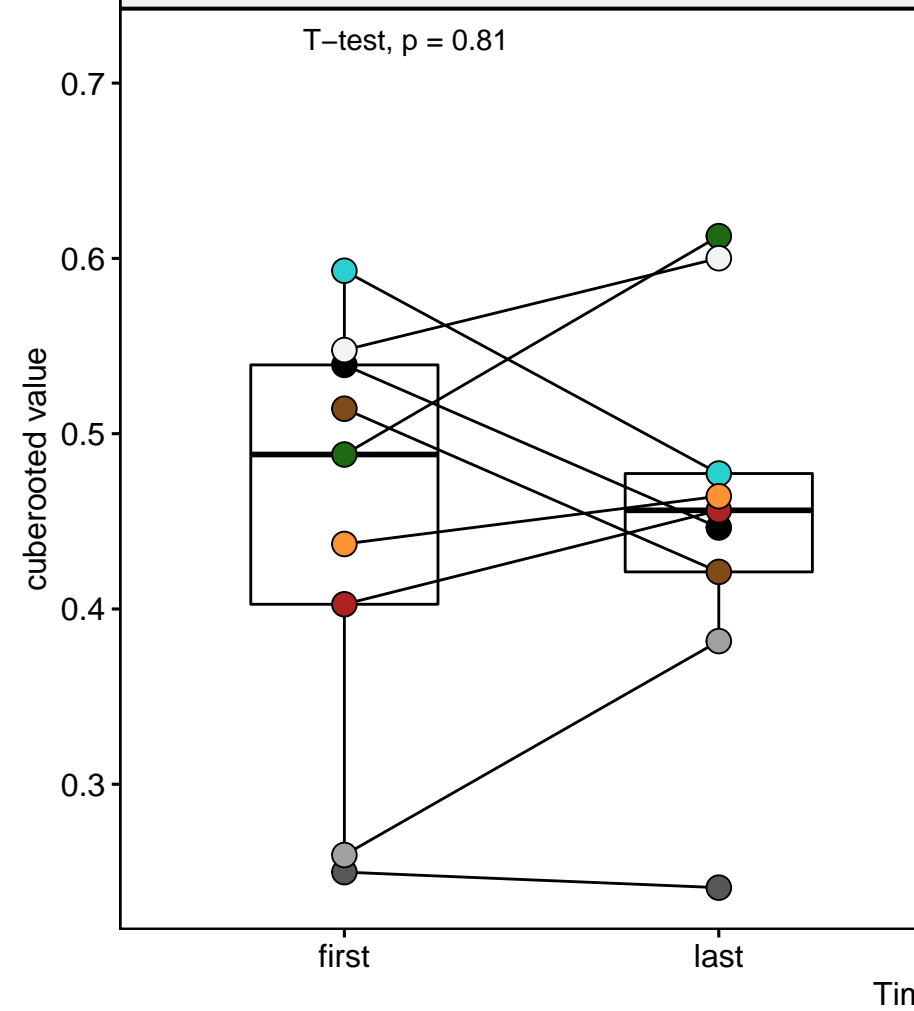

V

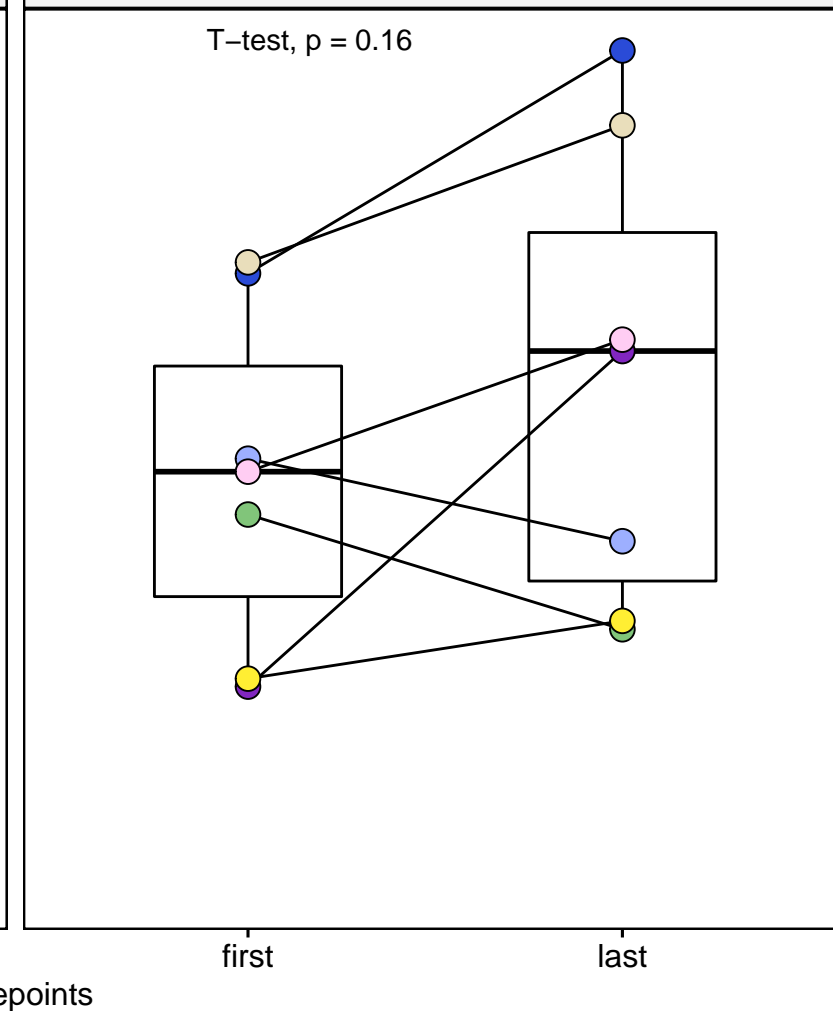

# L.Tyrosine\_amines

all patients (M+V)

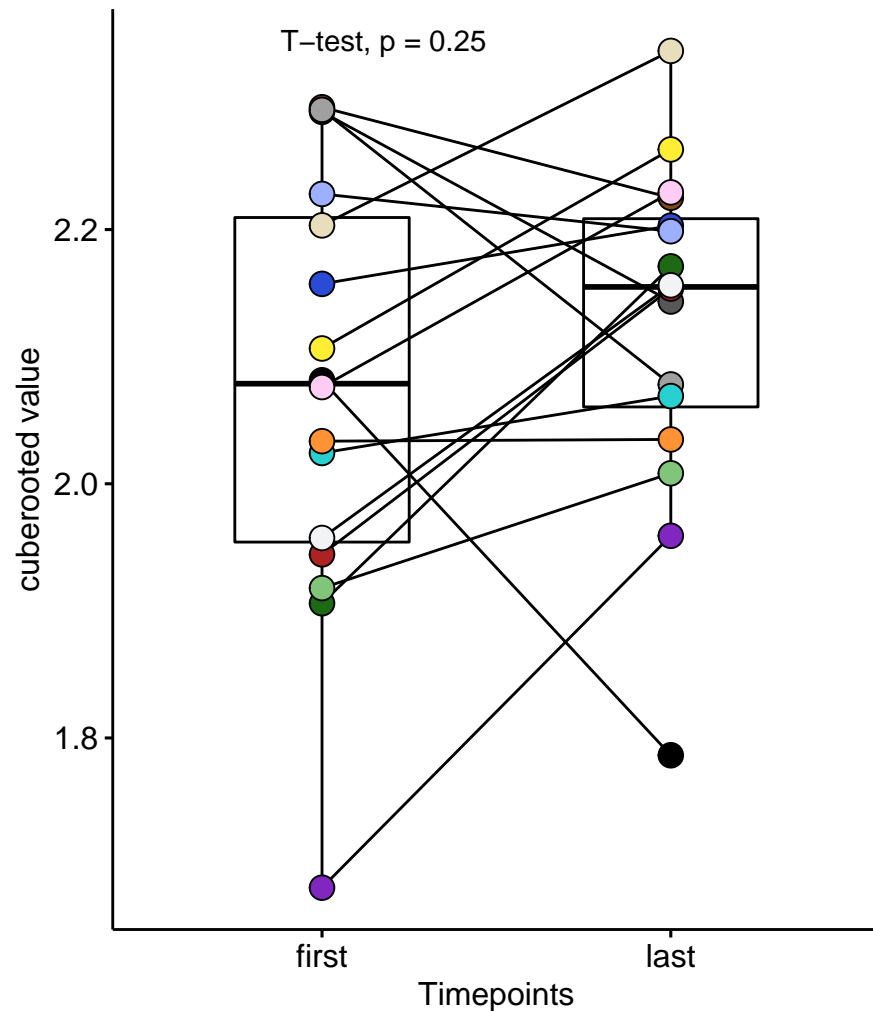

PatID

|              |               |              |              |
|--------------|---------------|--------------|--------------|
| 11_V68_8days | 18_V52_11days | 27_M71_4days | 40_V69_4days |
| 12_V73_7days | 21_V53_9days  | 28_V53_6days | 41_M70_6days |
| 13_M74_4days | 22_M65_3days  | 30_M49_5days | 44_M57_5days |
| 15_M71_7days | 25_M87_3days  | 32_V69_3days | 6d_M79_8days |

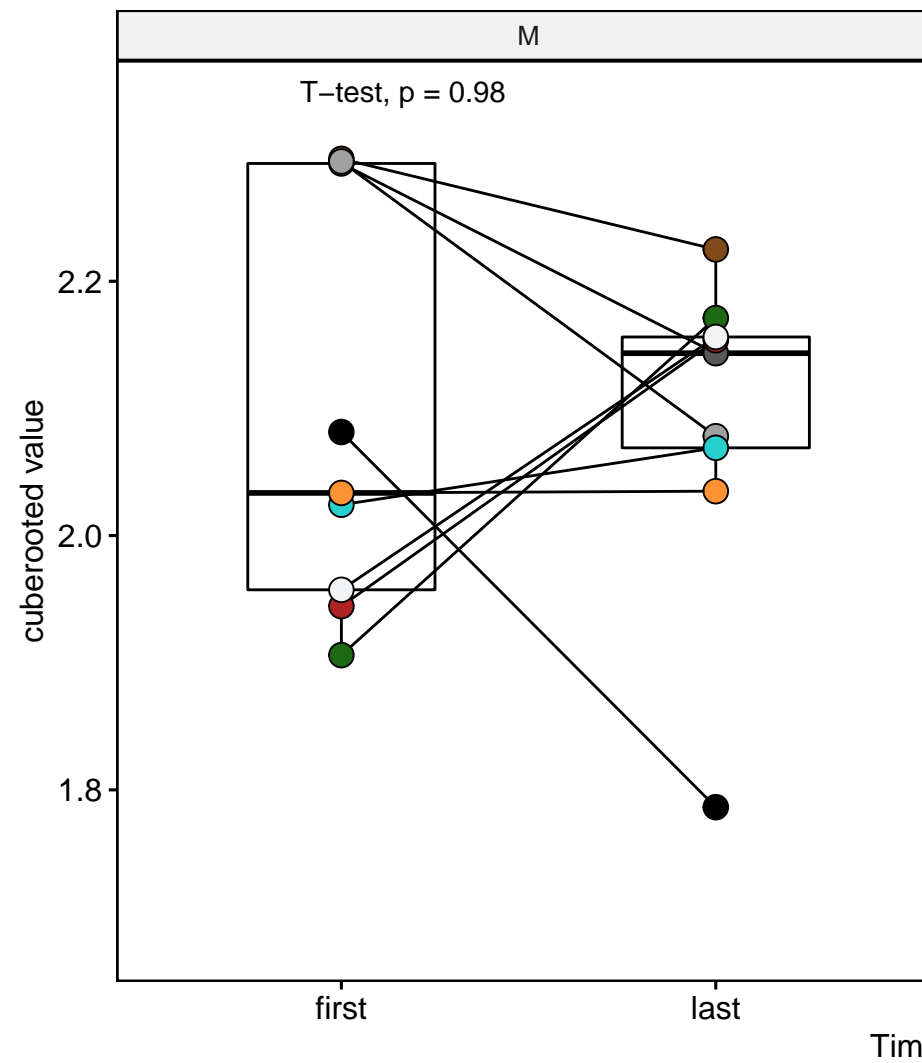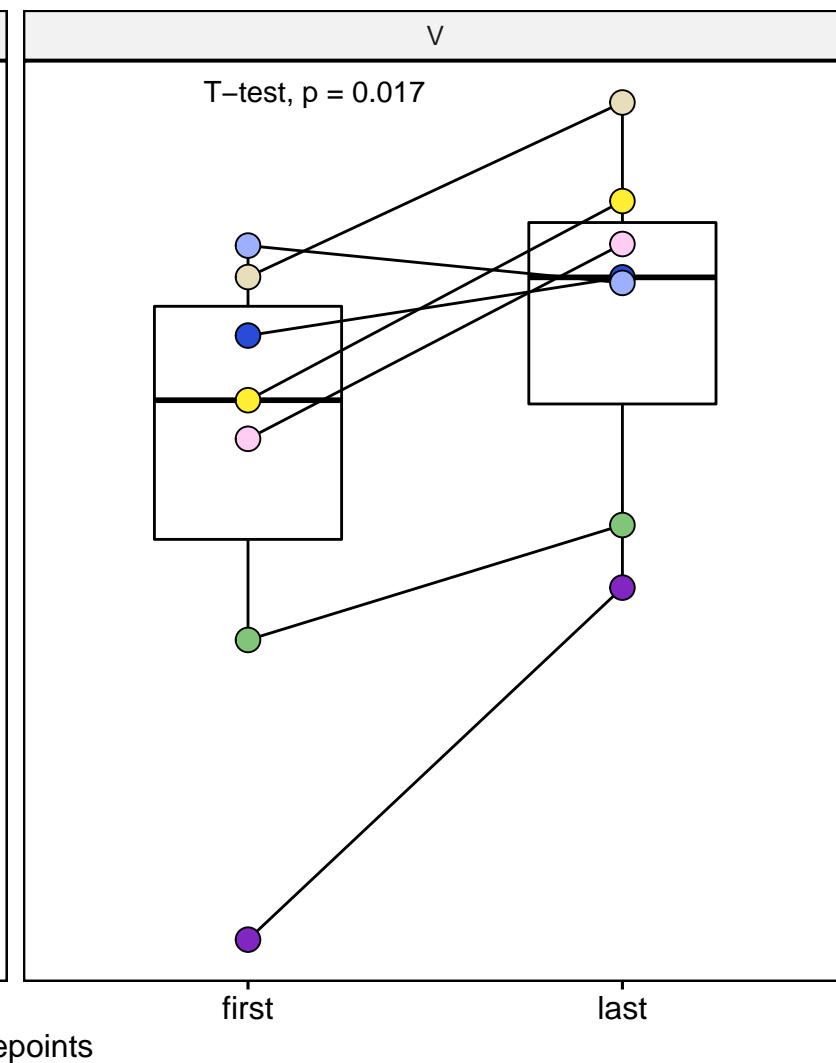

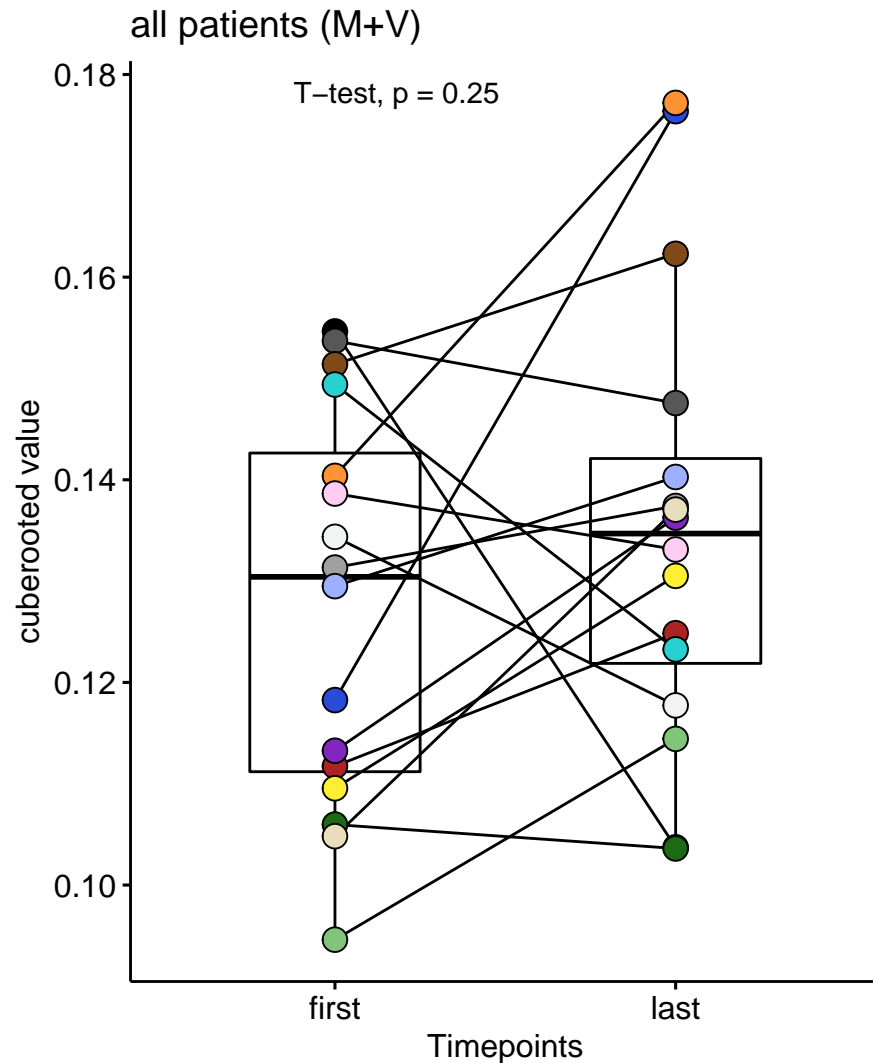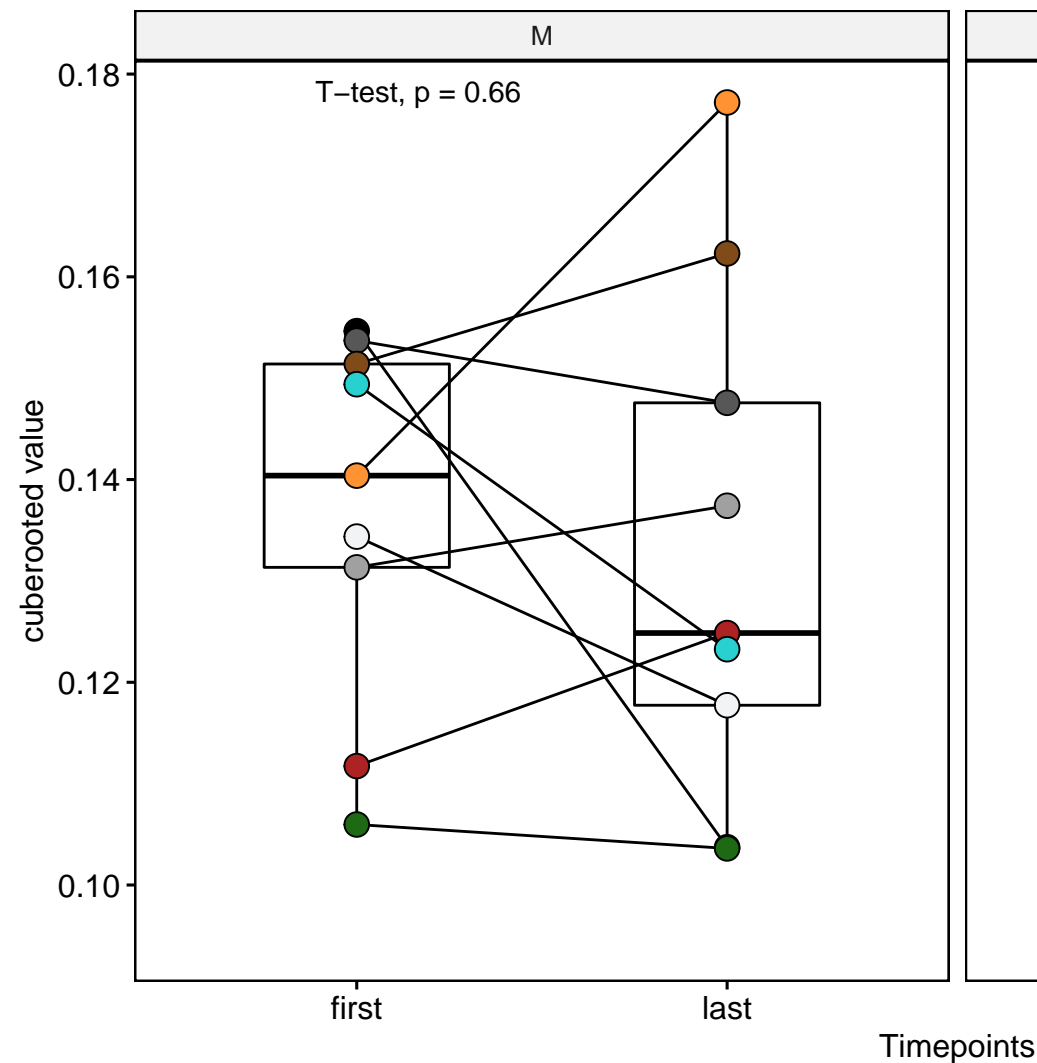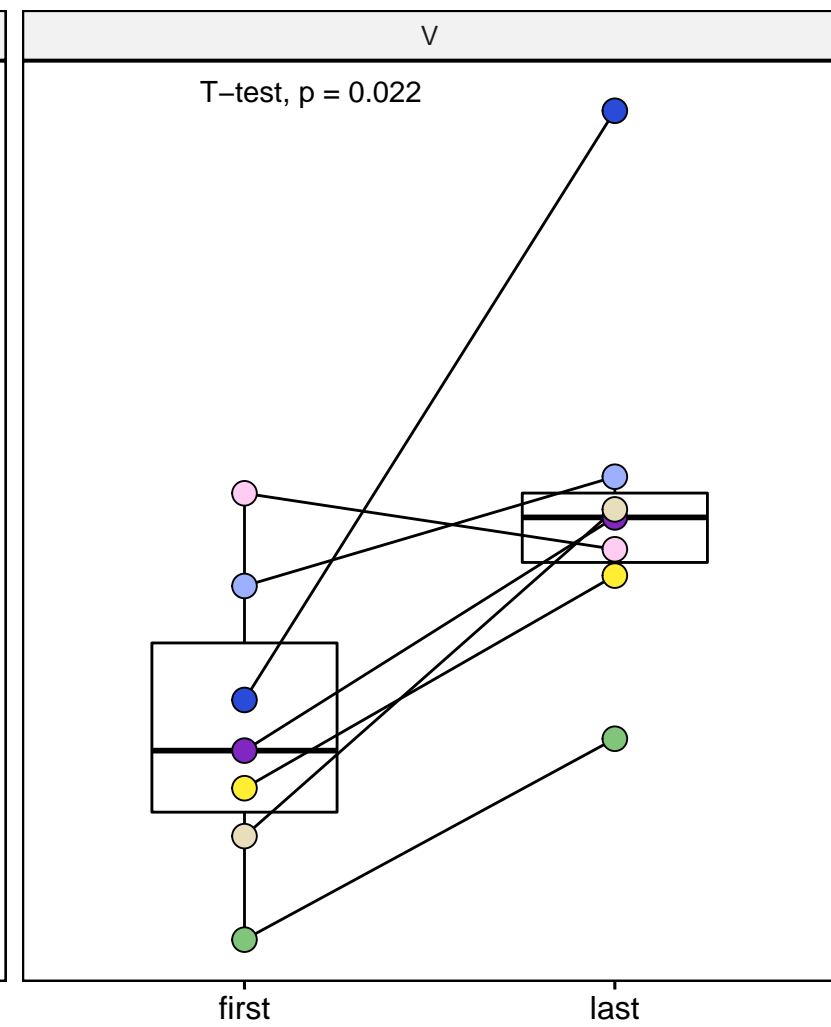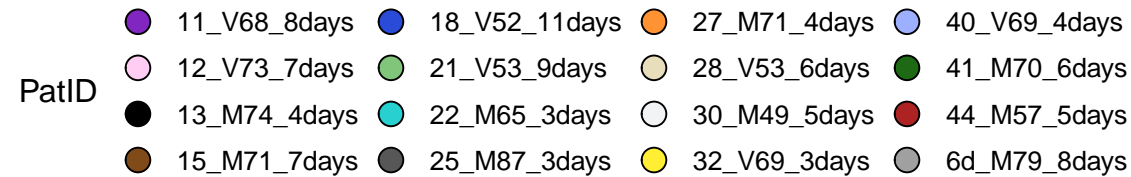



all patients (M+V)

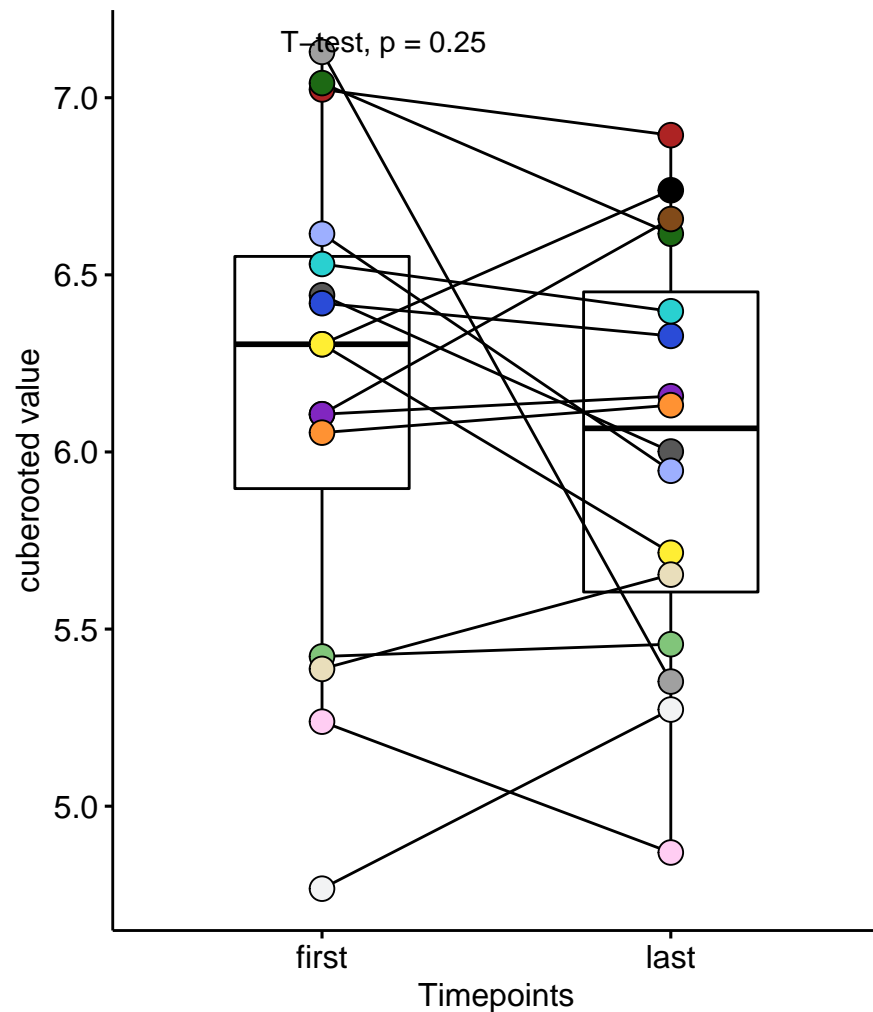

GCSF

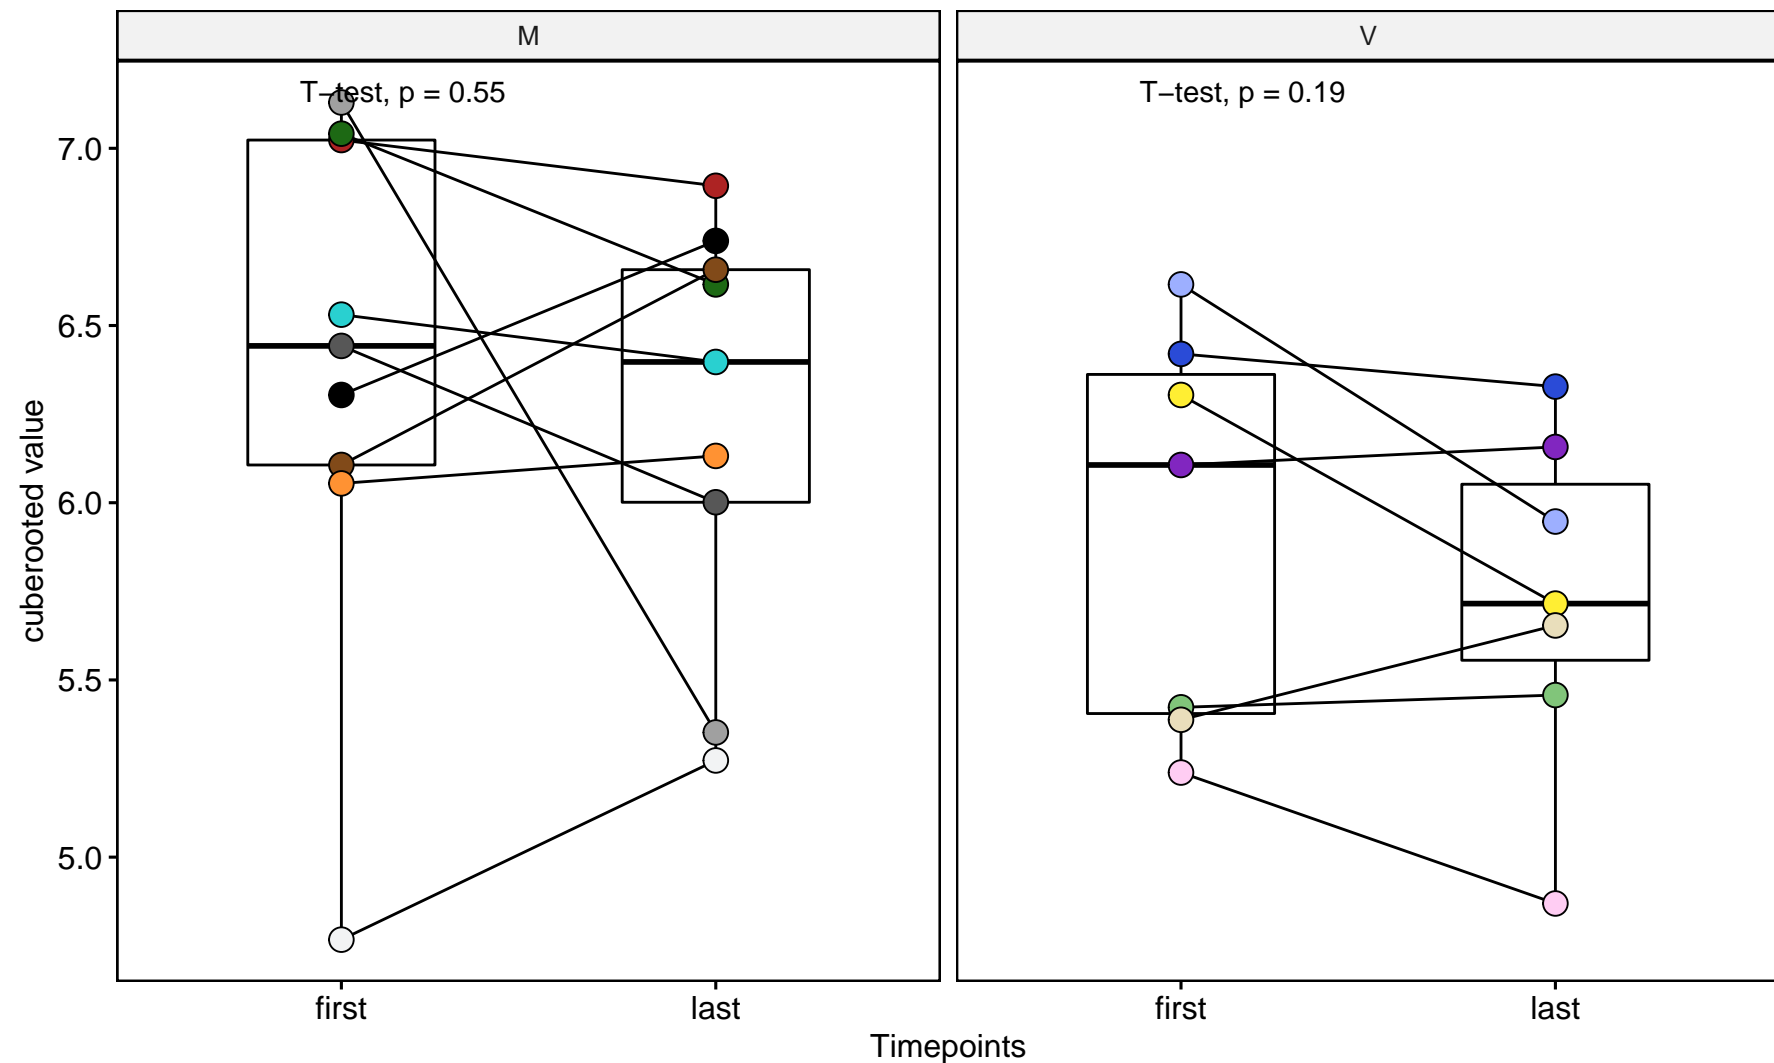

PatID

|              |               |              |              |
|--------------|---------------|--------------|--------------|
| 11_V68_8days | 18_V52_11days | 27_M71_4days | 40_V69_4days |
| 12_V73_7days | 21_V53_9days  | 28_V53_6days | 41_M70_6days |
| 13_M74_4days | 22_M65_3days  | 30_M49_5days | 44_M57_5days |
| 15_M71_7days | 25_M87_3days  | 32_V69_3days | 6d_M79_8days |

all patients (M+V)

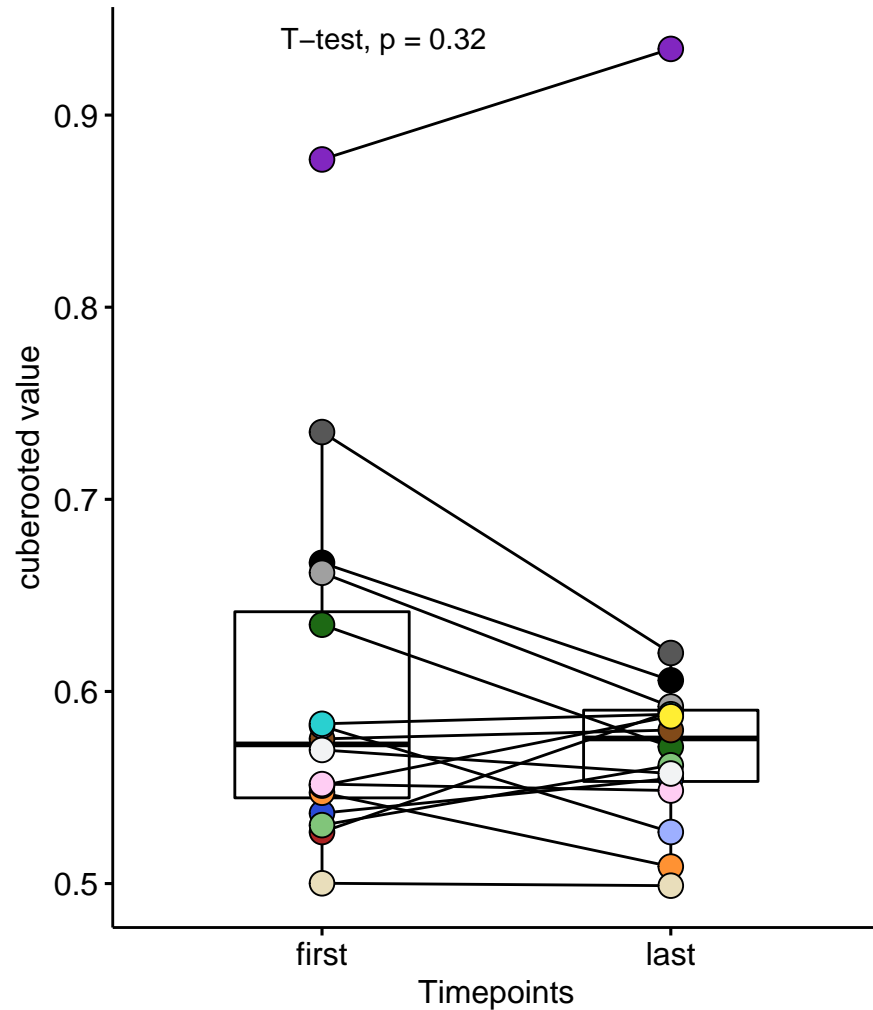

PatID

|              |               |              |              |
|--------------|---------------|--------------|--------------|
| 11_V68_8days | 18_V52_11days | 27_M71_4days | 40_V69_4days |
| 12_V73_7days | 21_V53_9days  | 28_V53_6days | 41_M70_6days |
| 13_M74_4days | 22_M65_3days  | 30_M49_5days | 44_M57_5days |
| 15_M71_7days | 25_M87_3days  | 32_V69_3days | 6d_M79_8days |

M

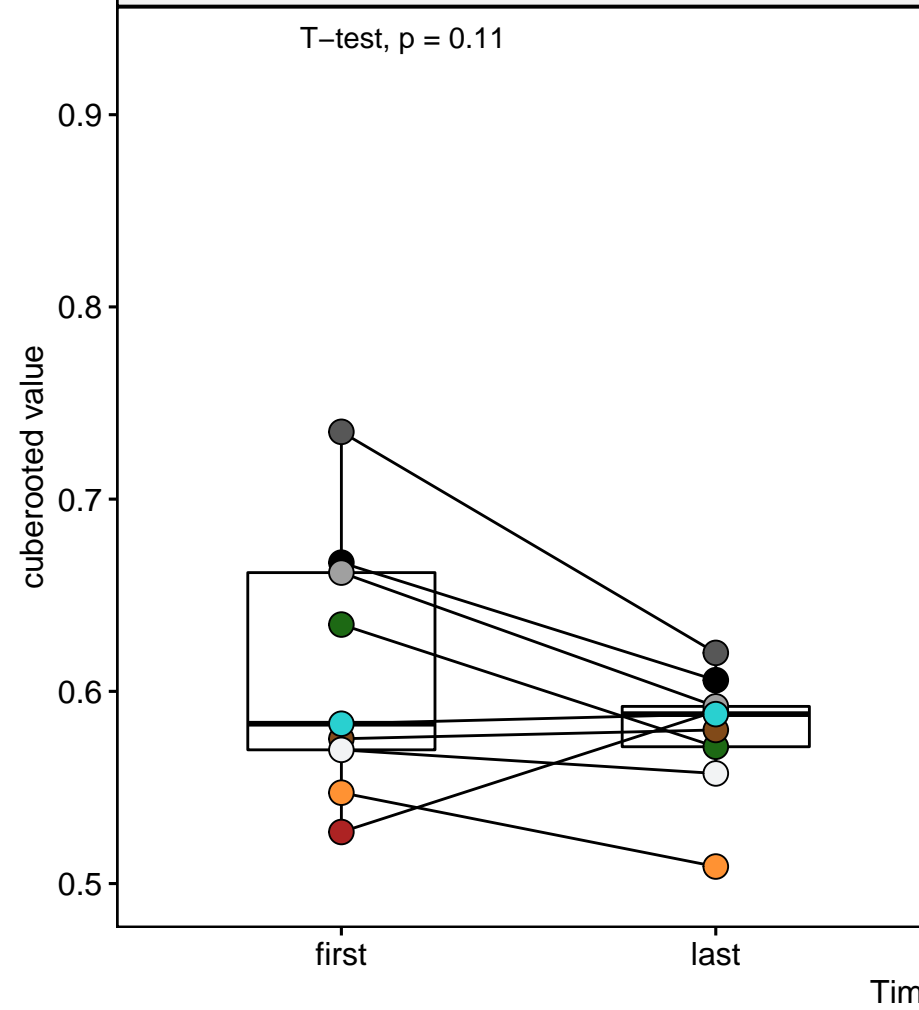

V

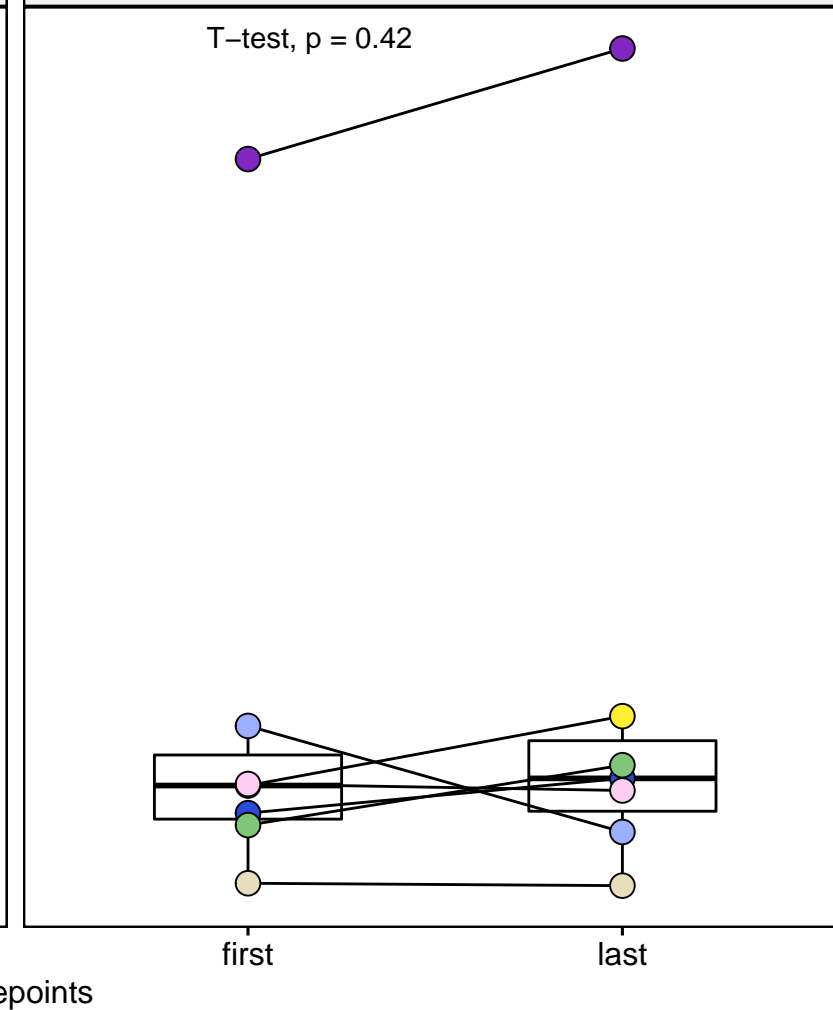

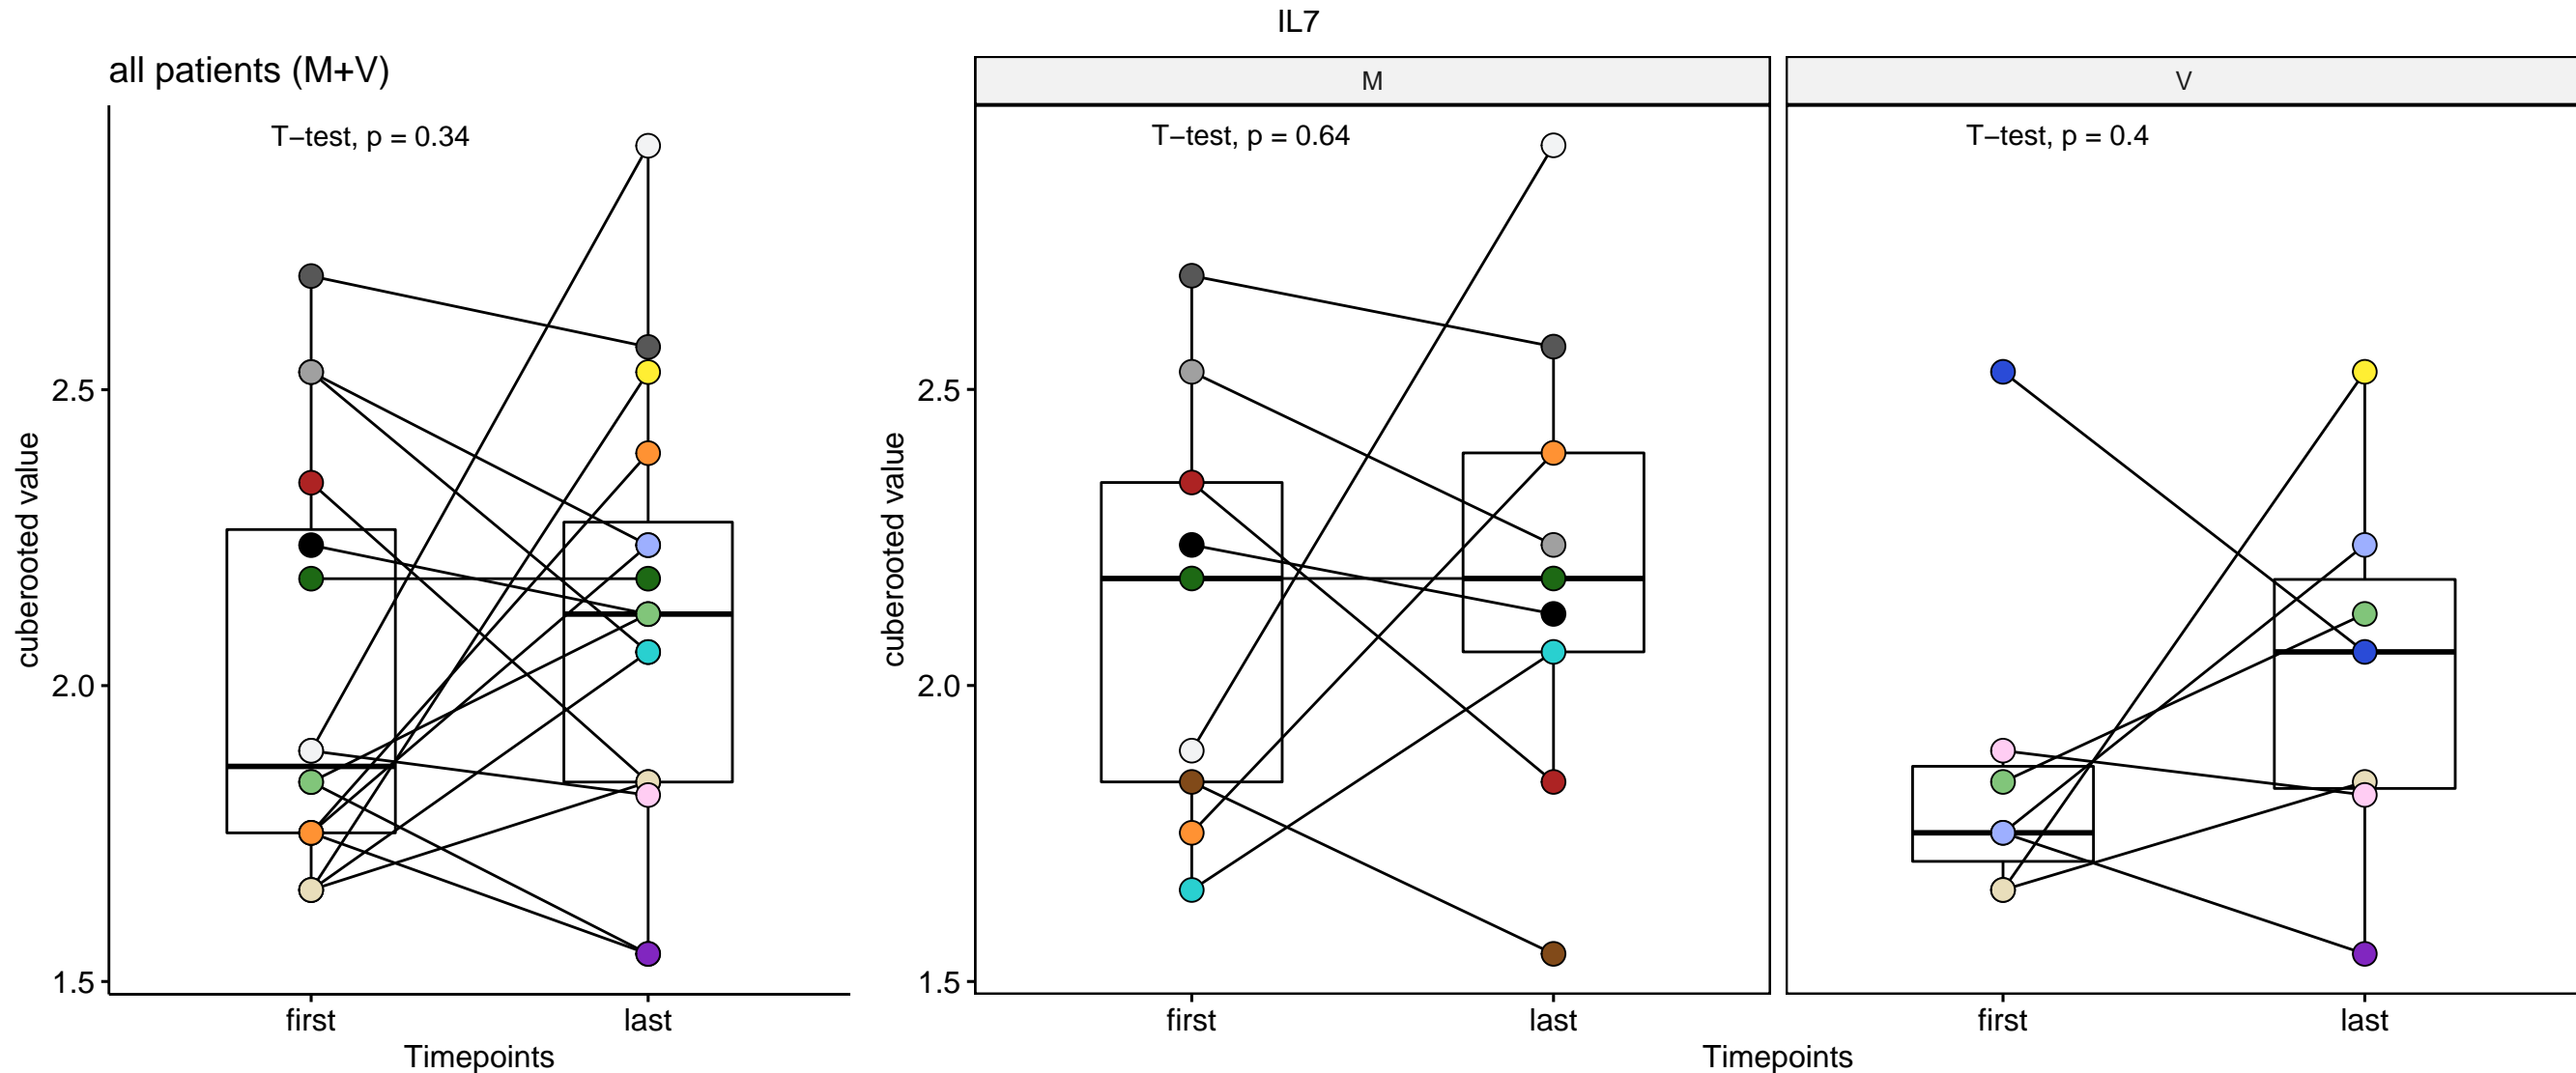

# Serotonine\_amines

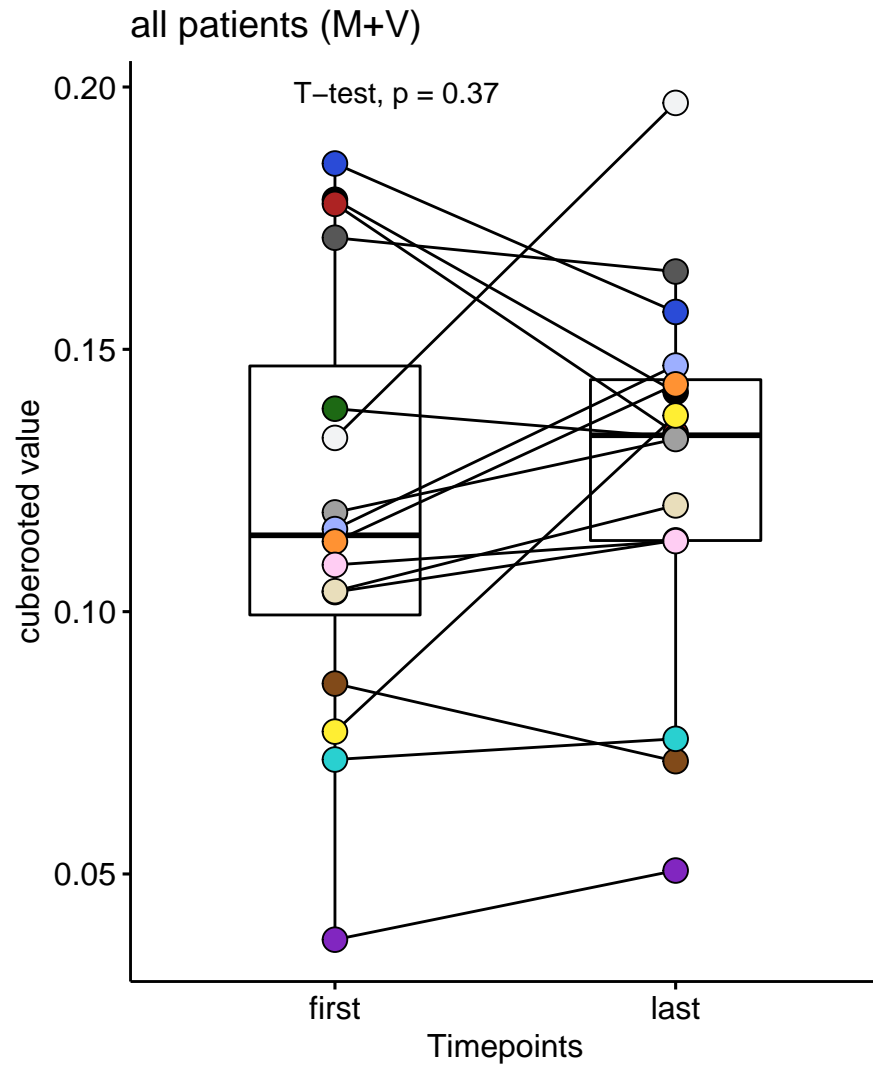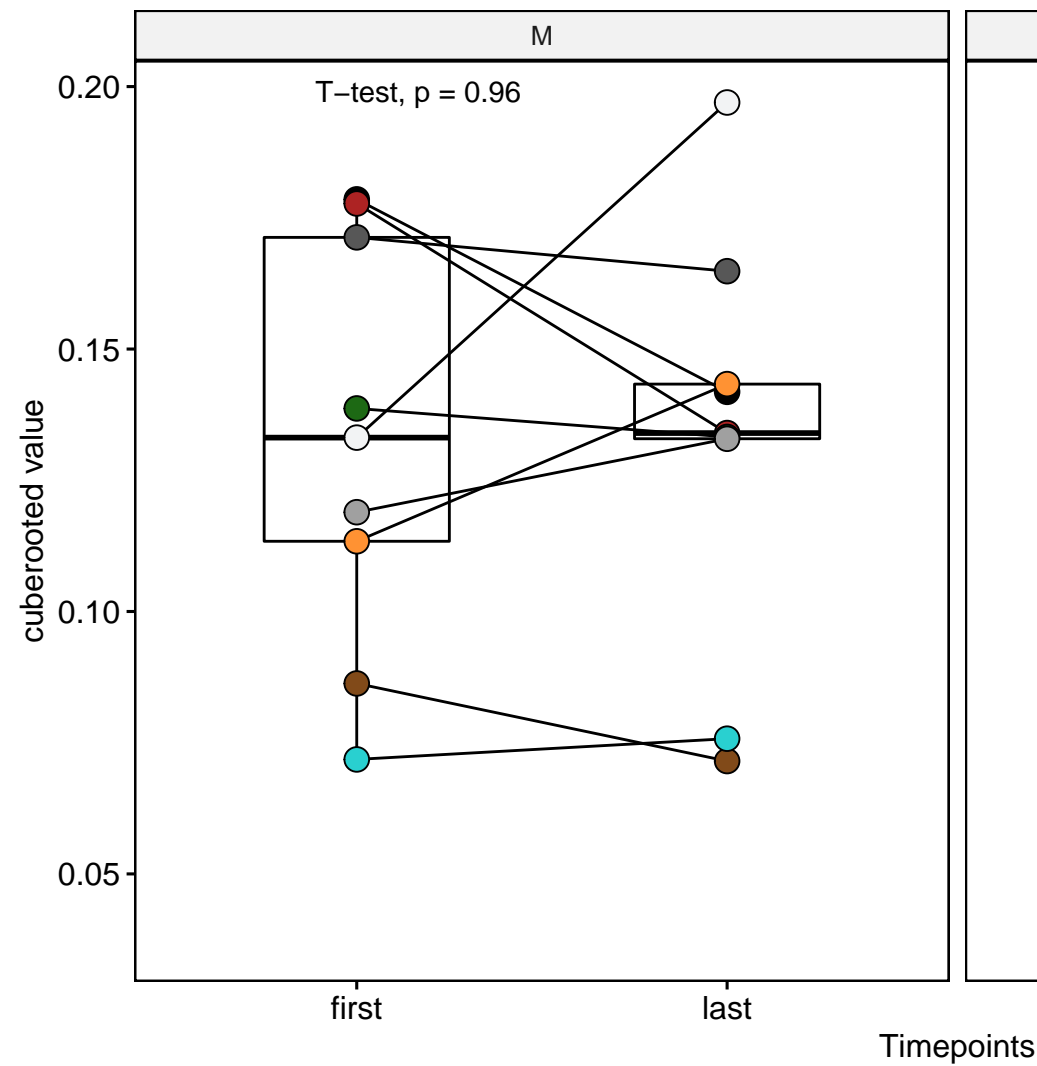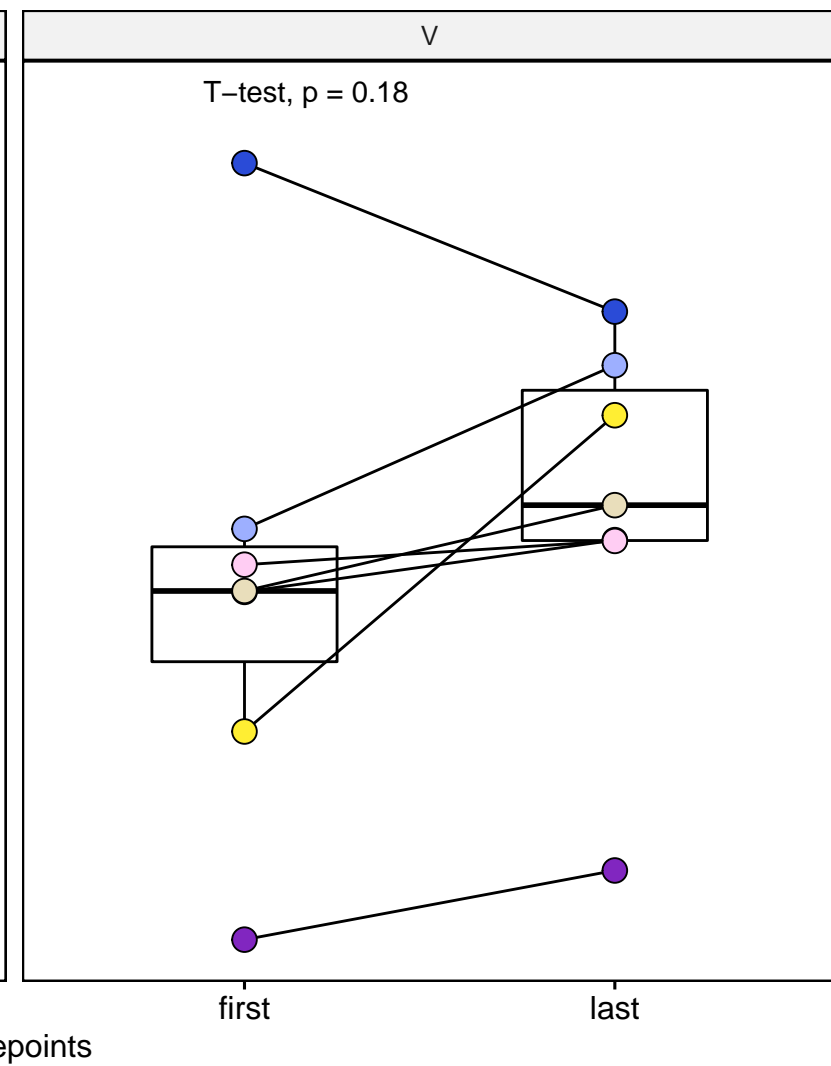

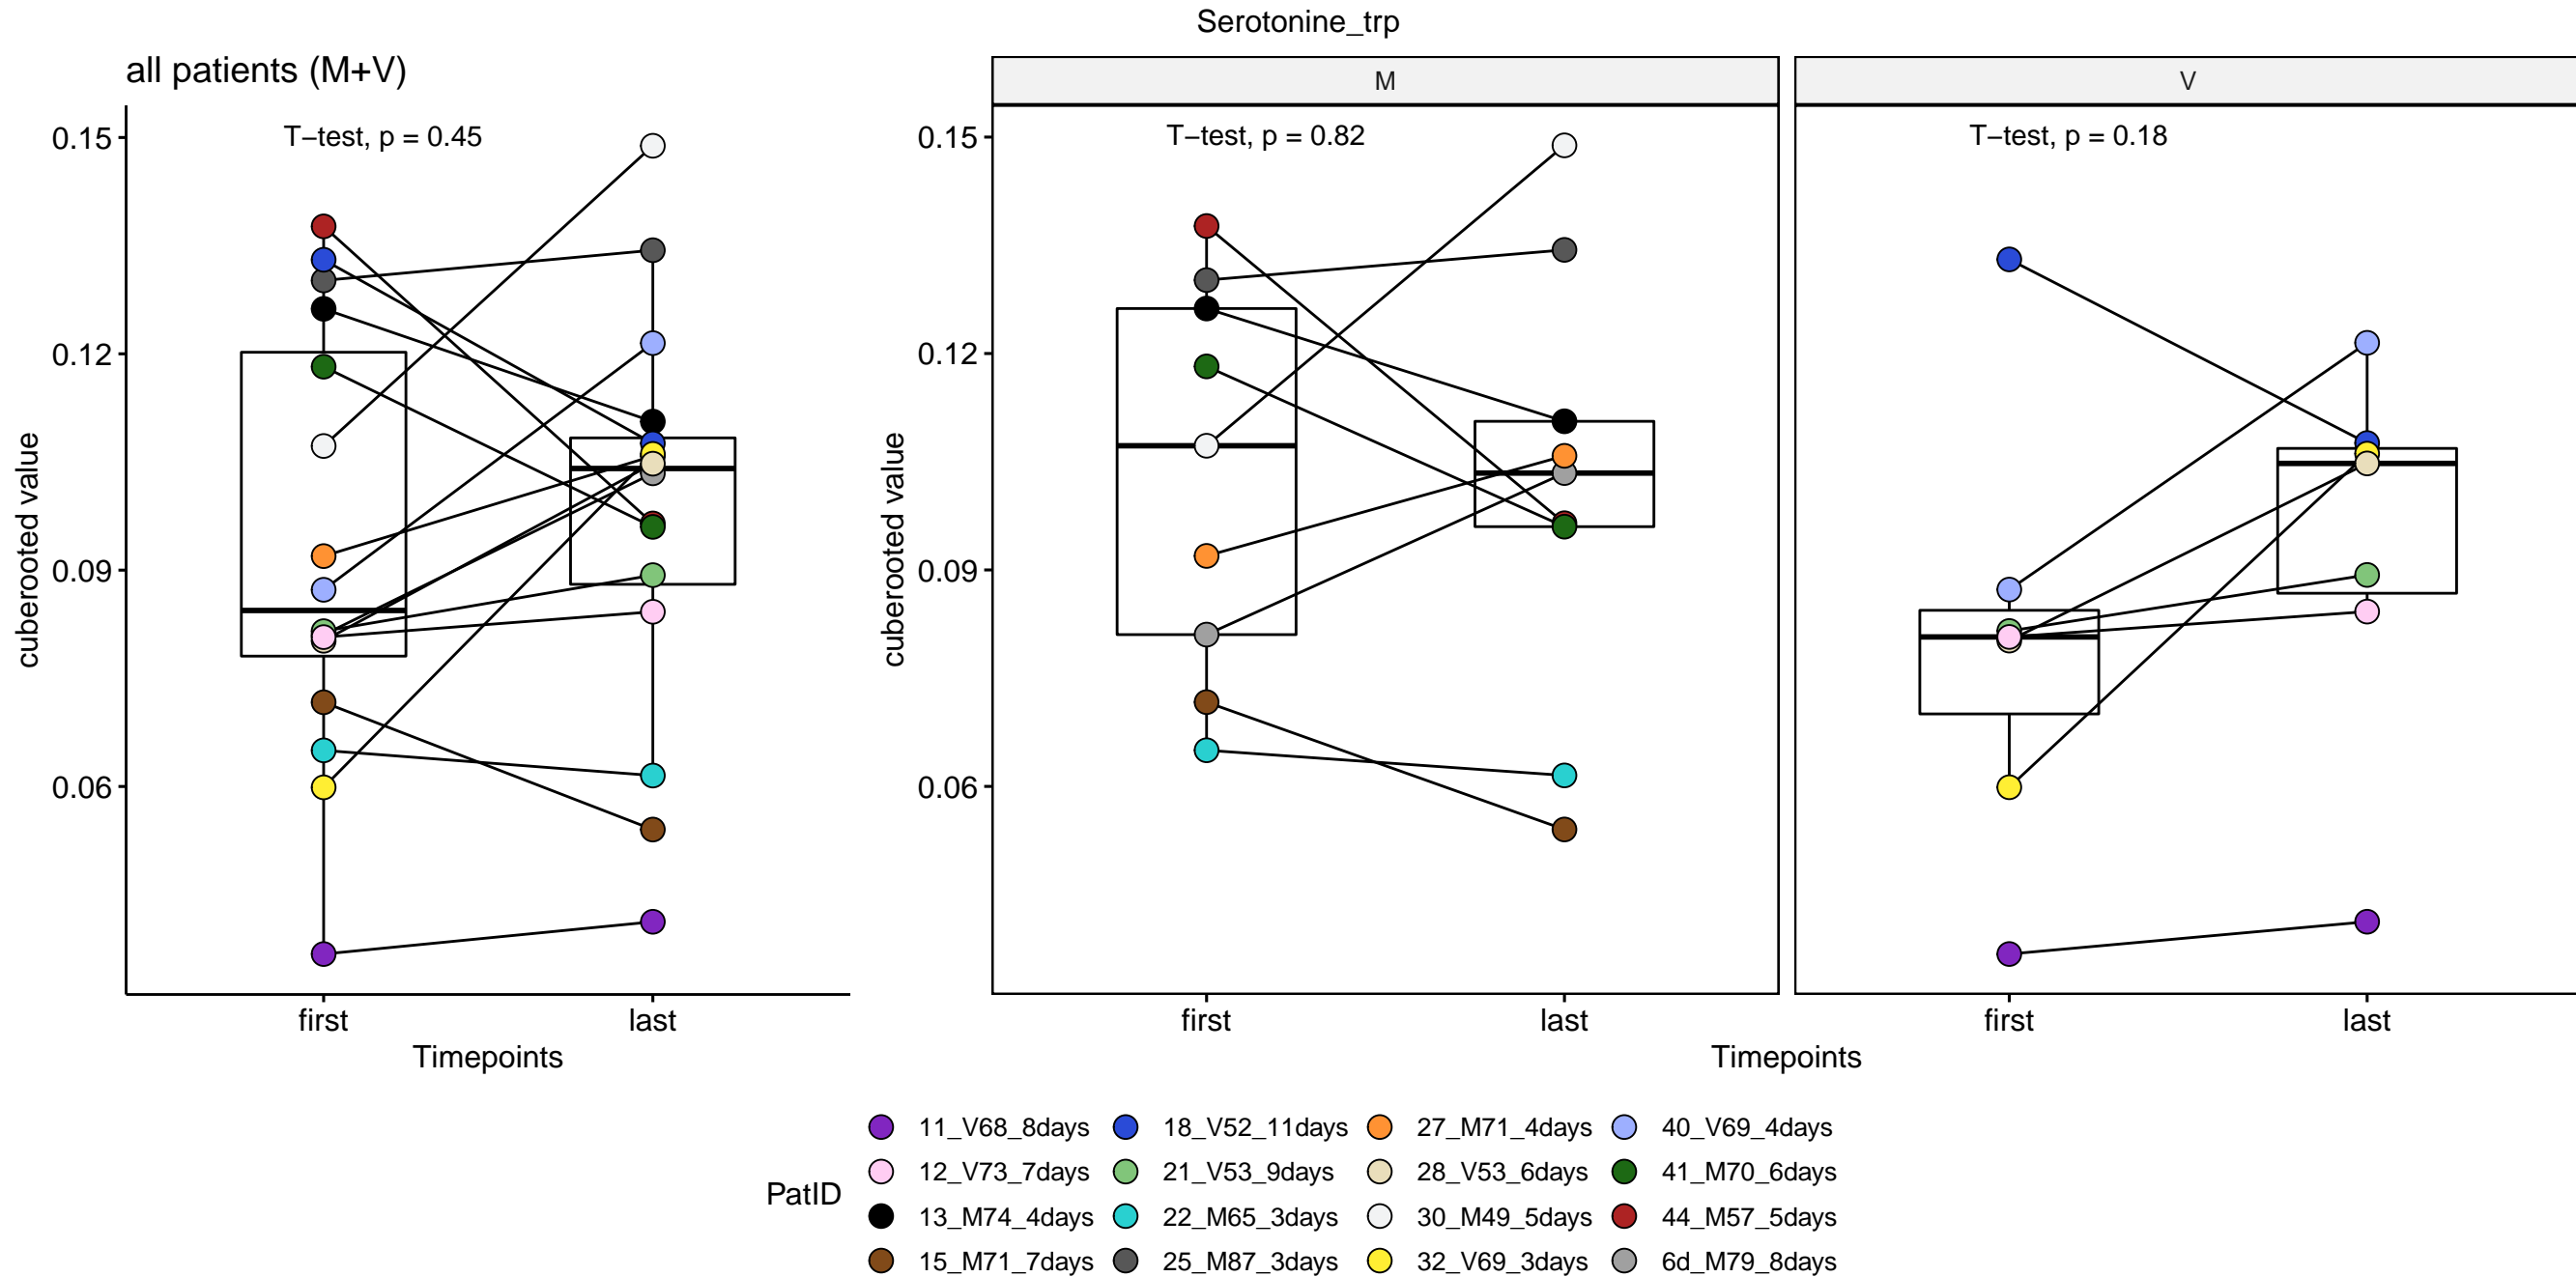

# L.Tryptophan\_amines

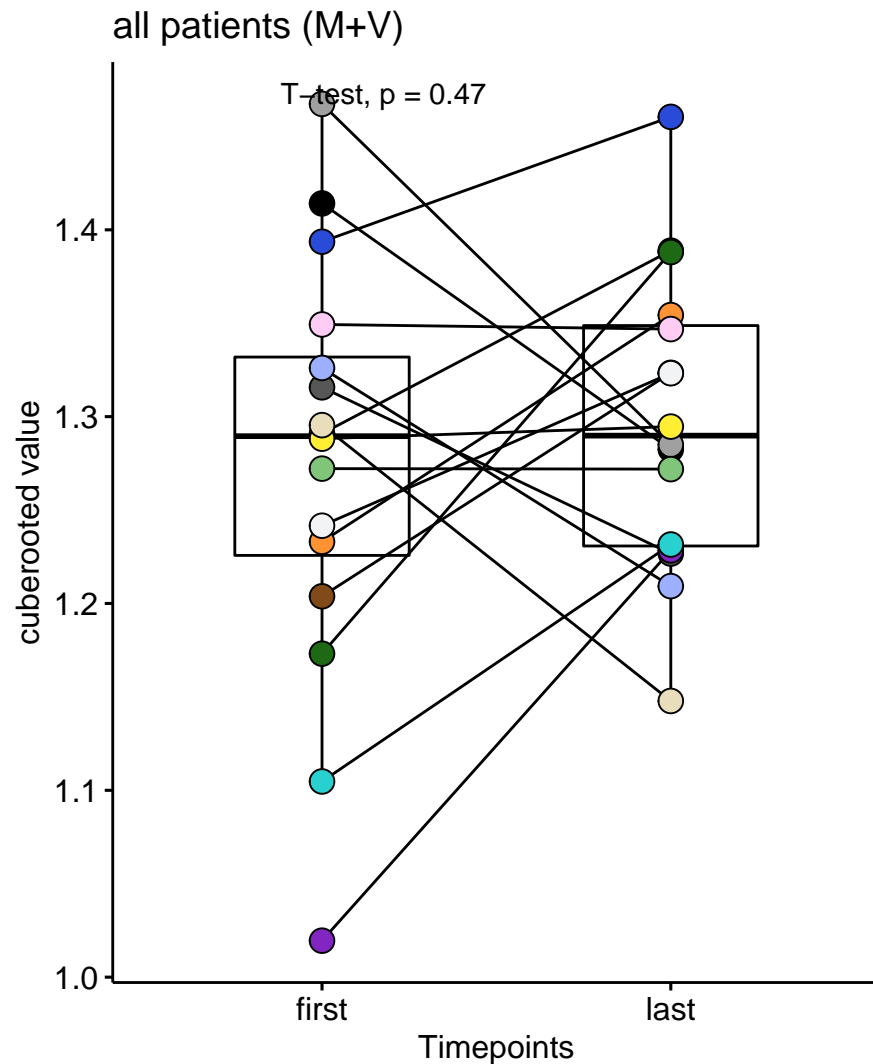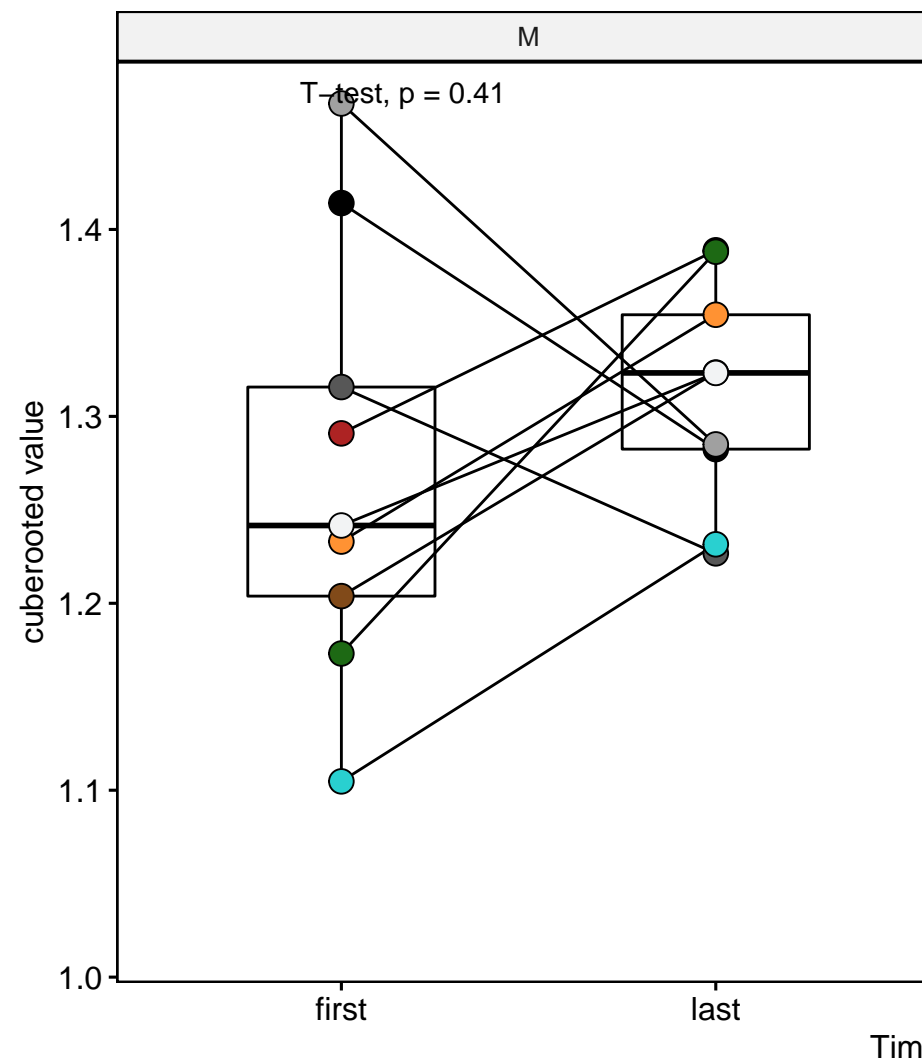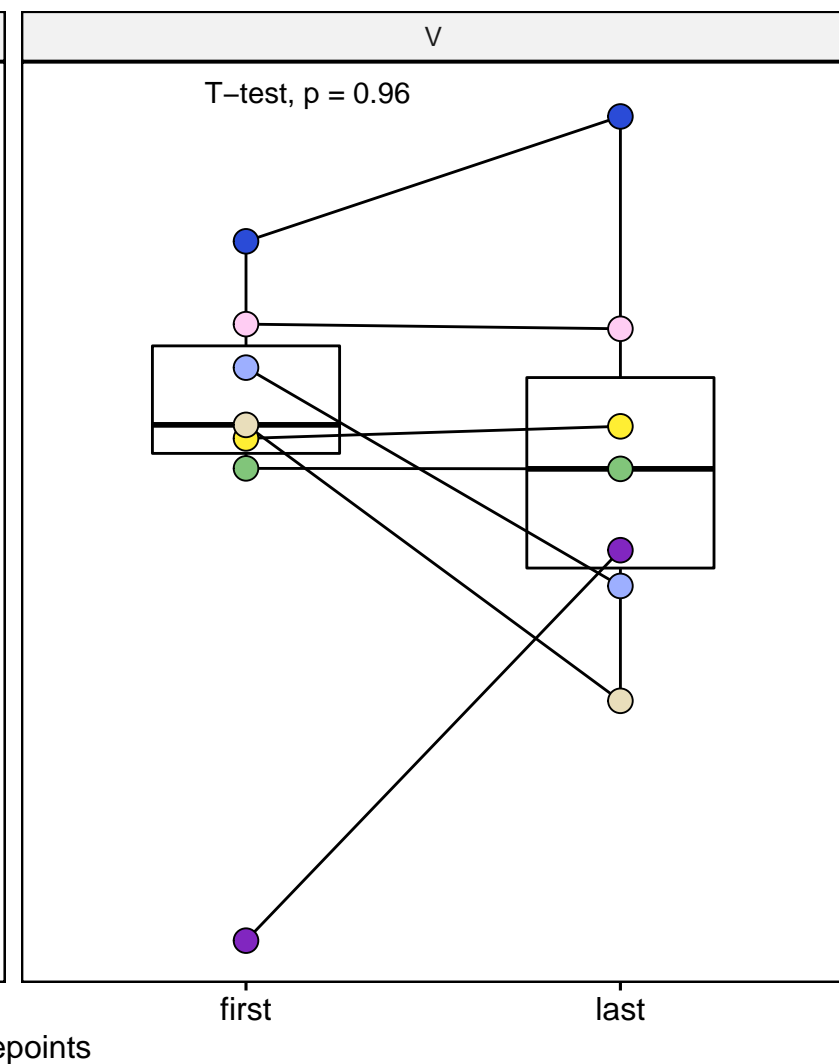

## NK\_cells

all patients (M+V)

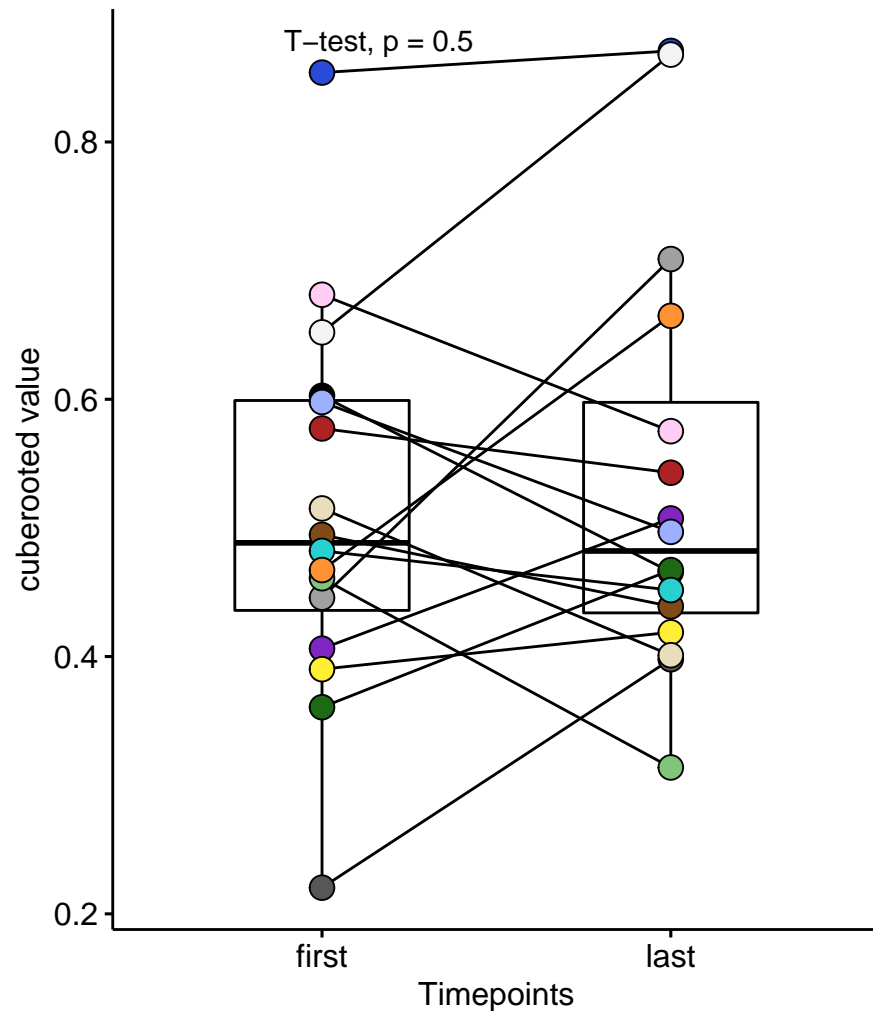

PatID

|              |               |              |              |
|--------------|---------------|--------------|--------------|
| 11_V68_8days | 18_V52_11days | 27_M71_4days | 40_V69_4days |
| 12_V73_7days | 21_V53_9days  | 28_V53_6days | 41_M70_6days |
| 13_M74_4days | 22_M65_3days  | 30_M49_5days | 44_M57_5days |
| 15_M71_7days | 25_M87_3days  | 32_V69_3days | 6d_M79_8days |

M

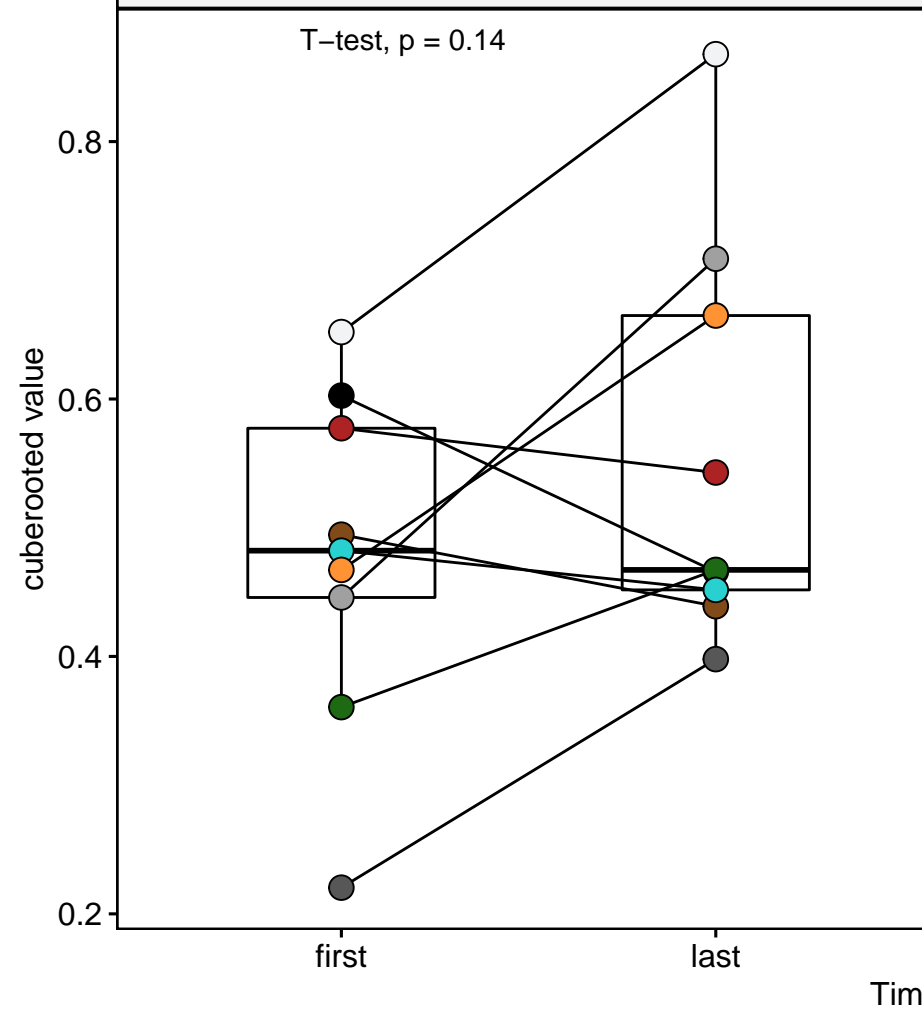

V

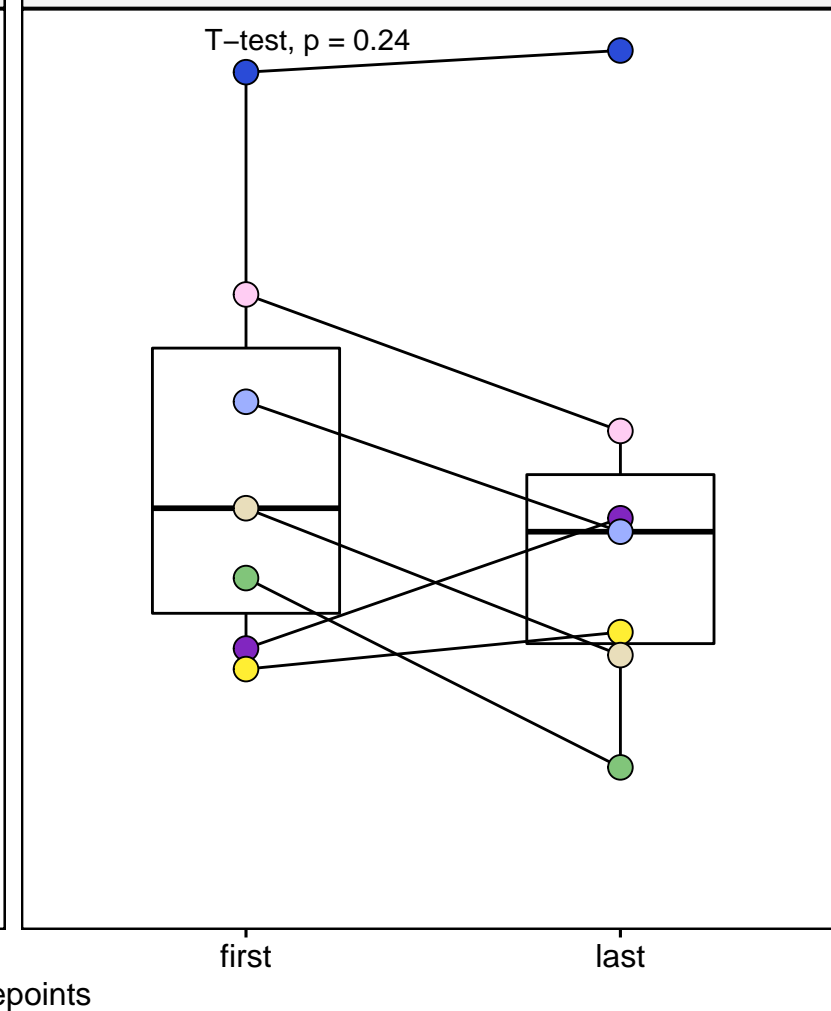

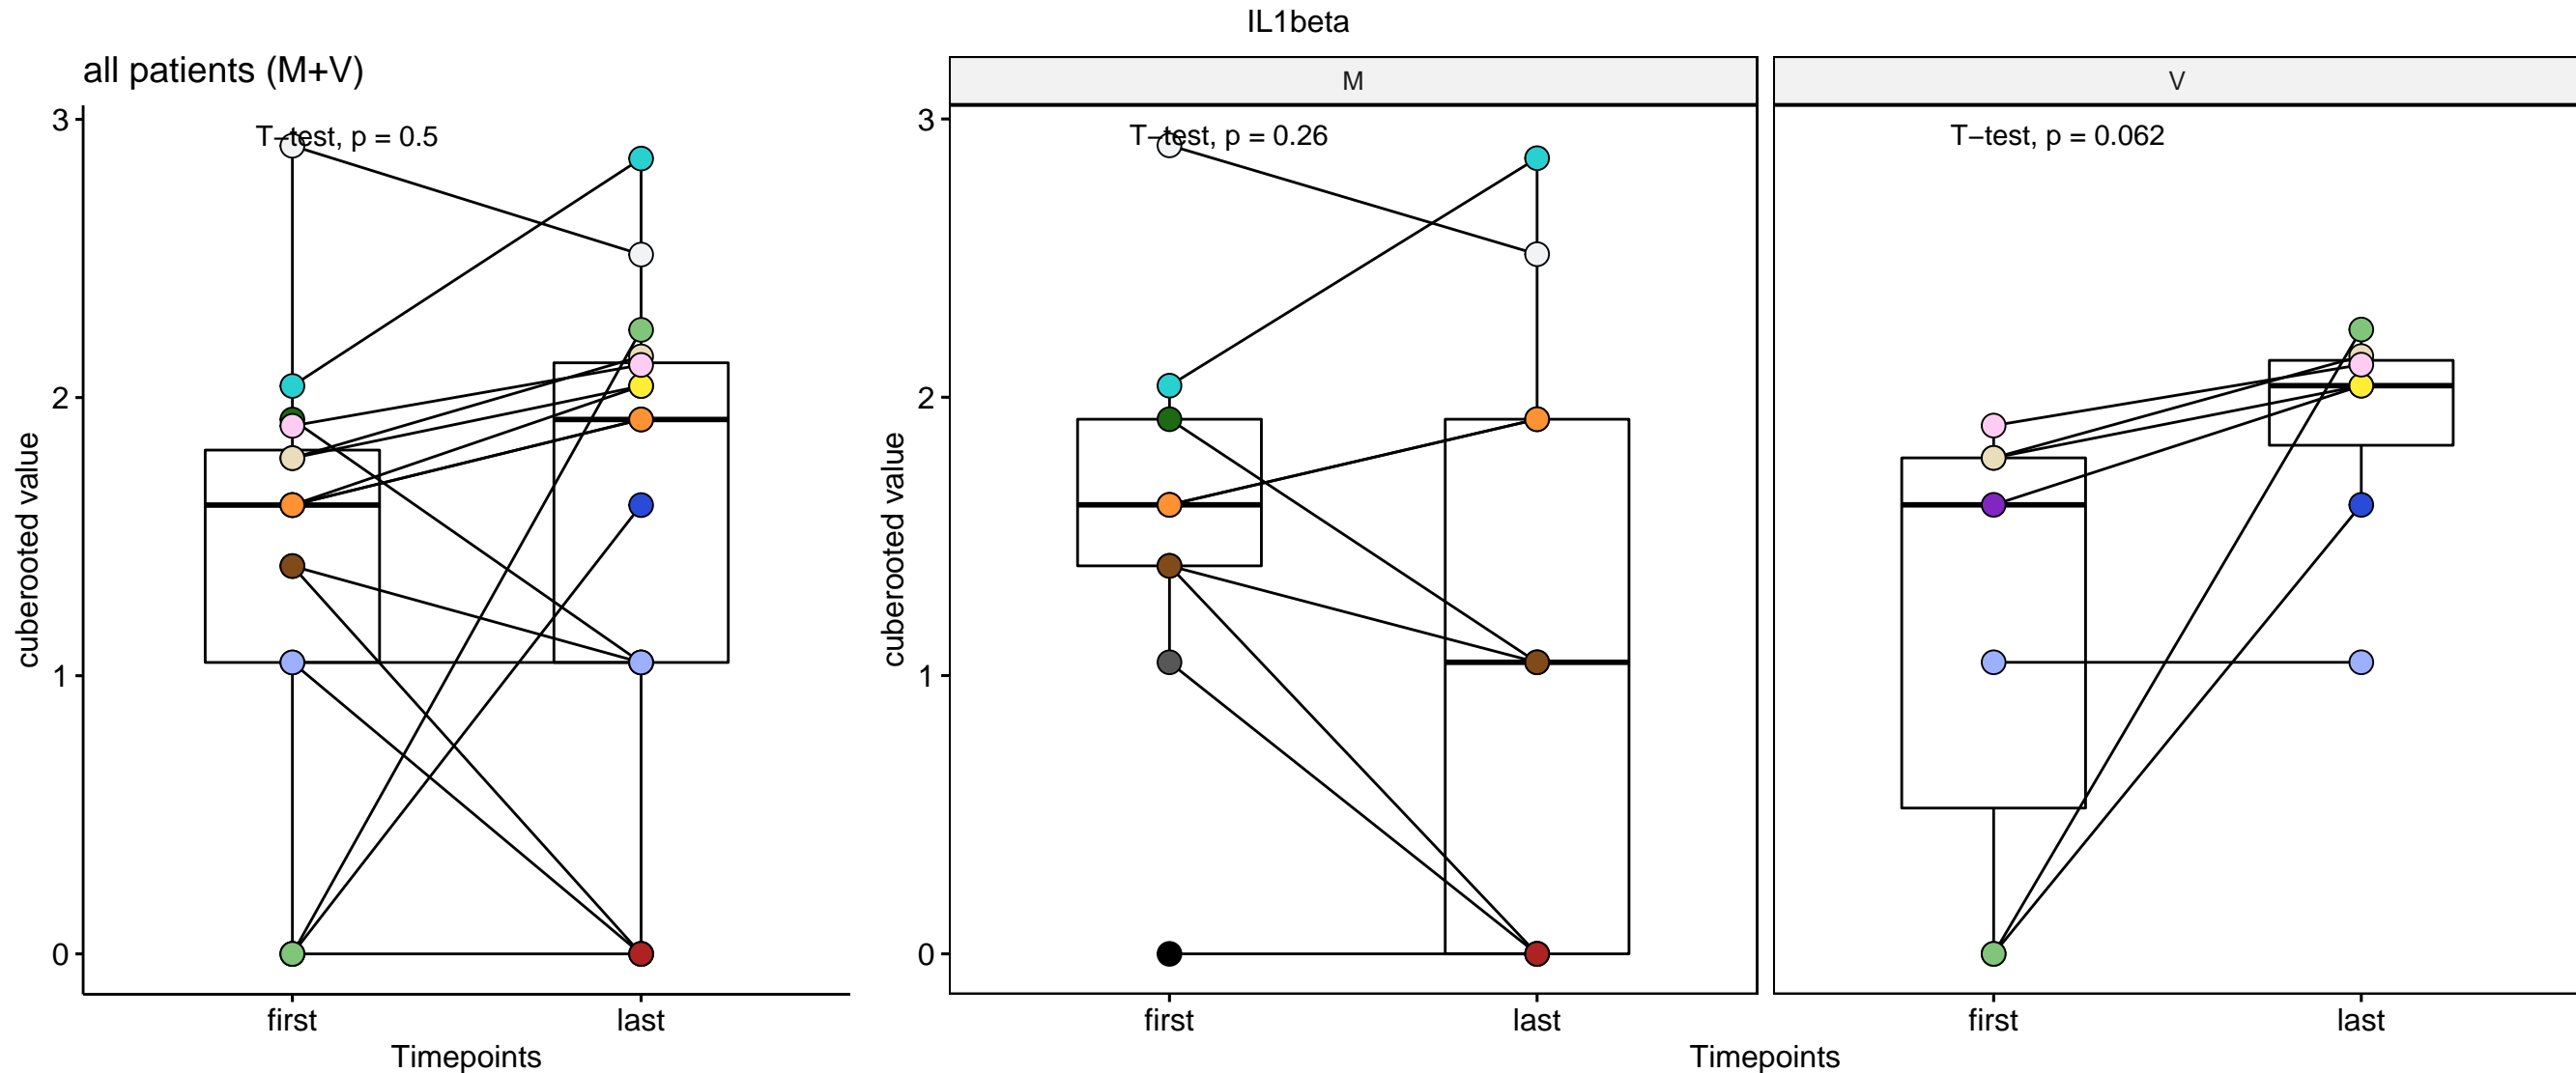



# Sarcosine\_amines

all patients (M+V)

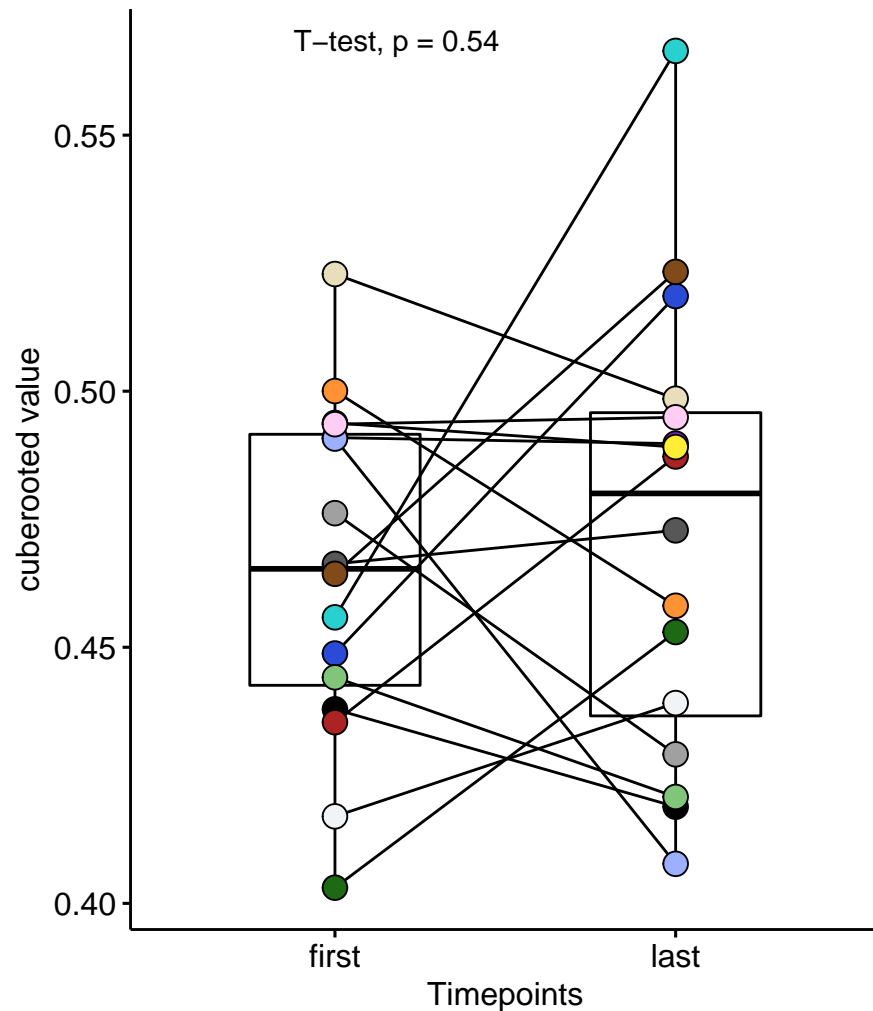

M

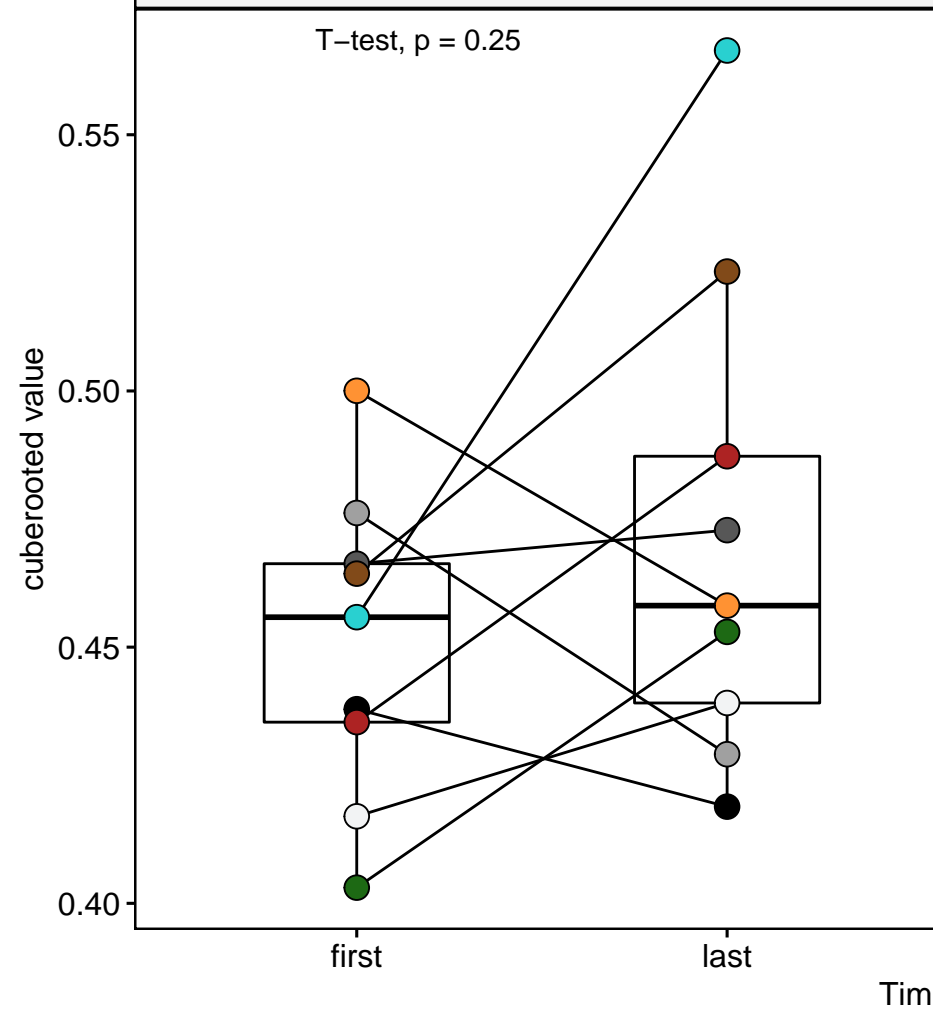

V

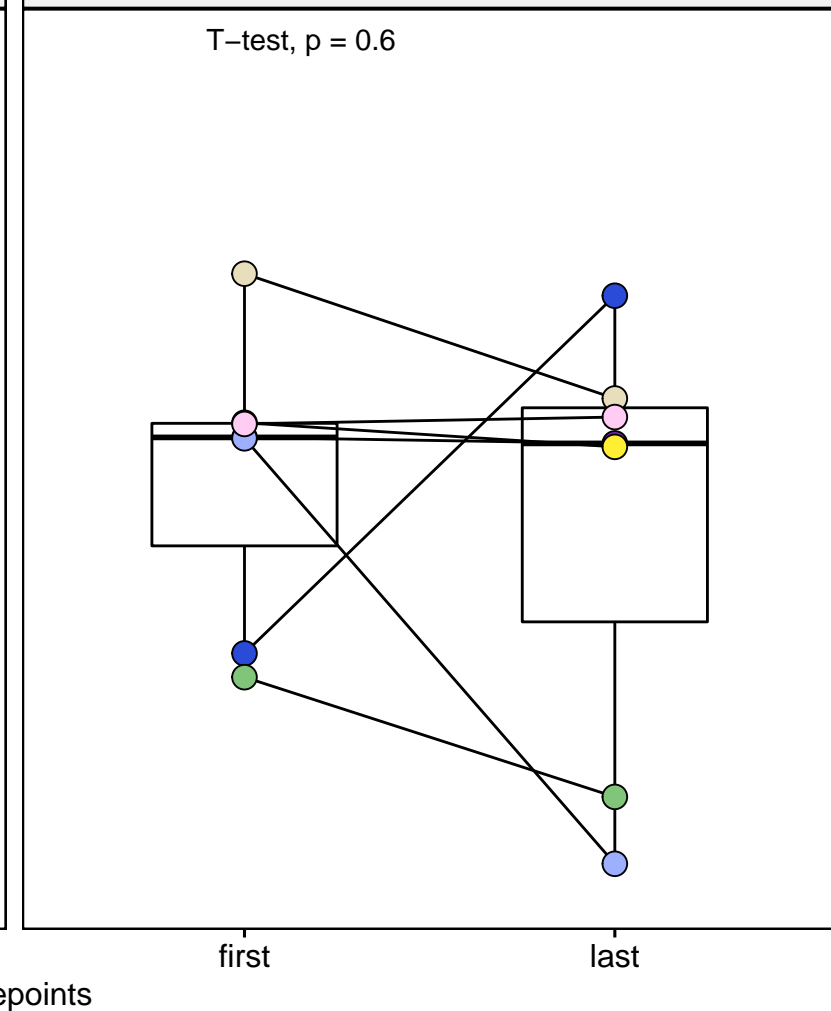

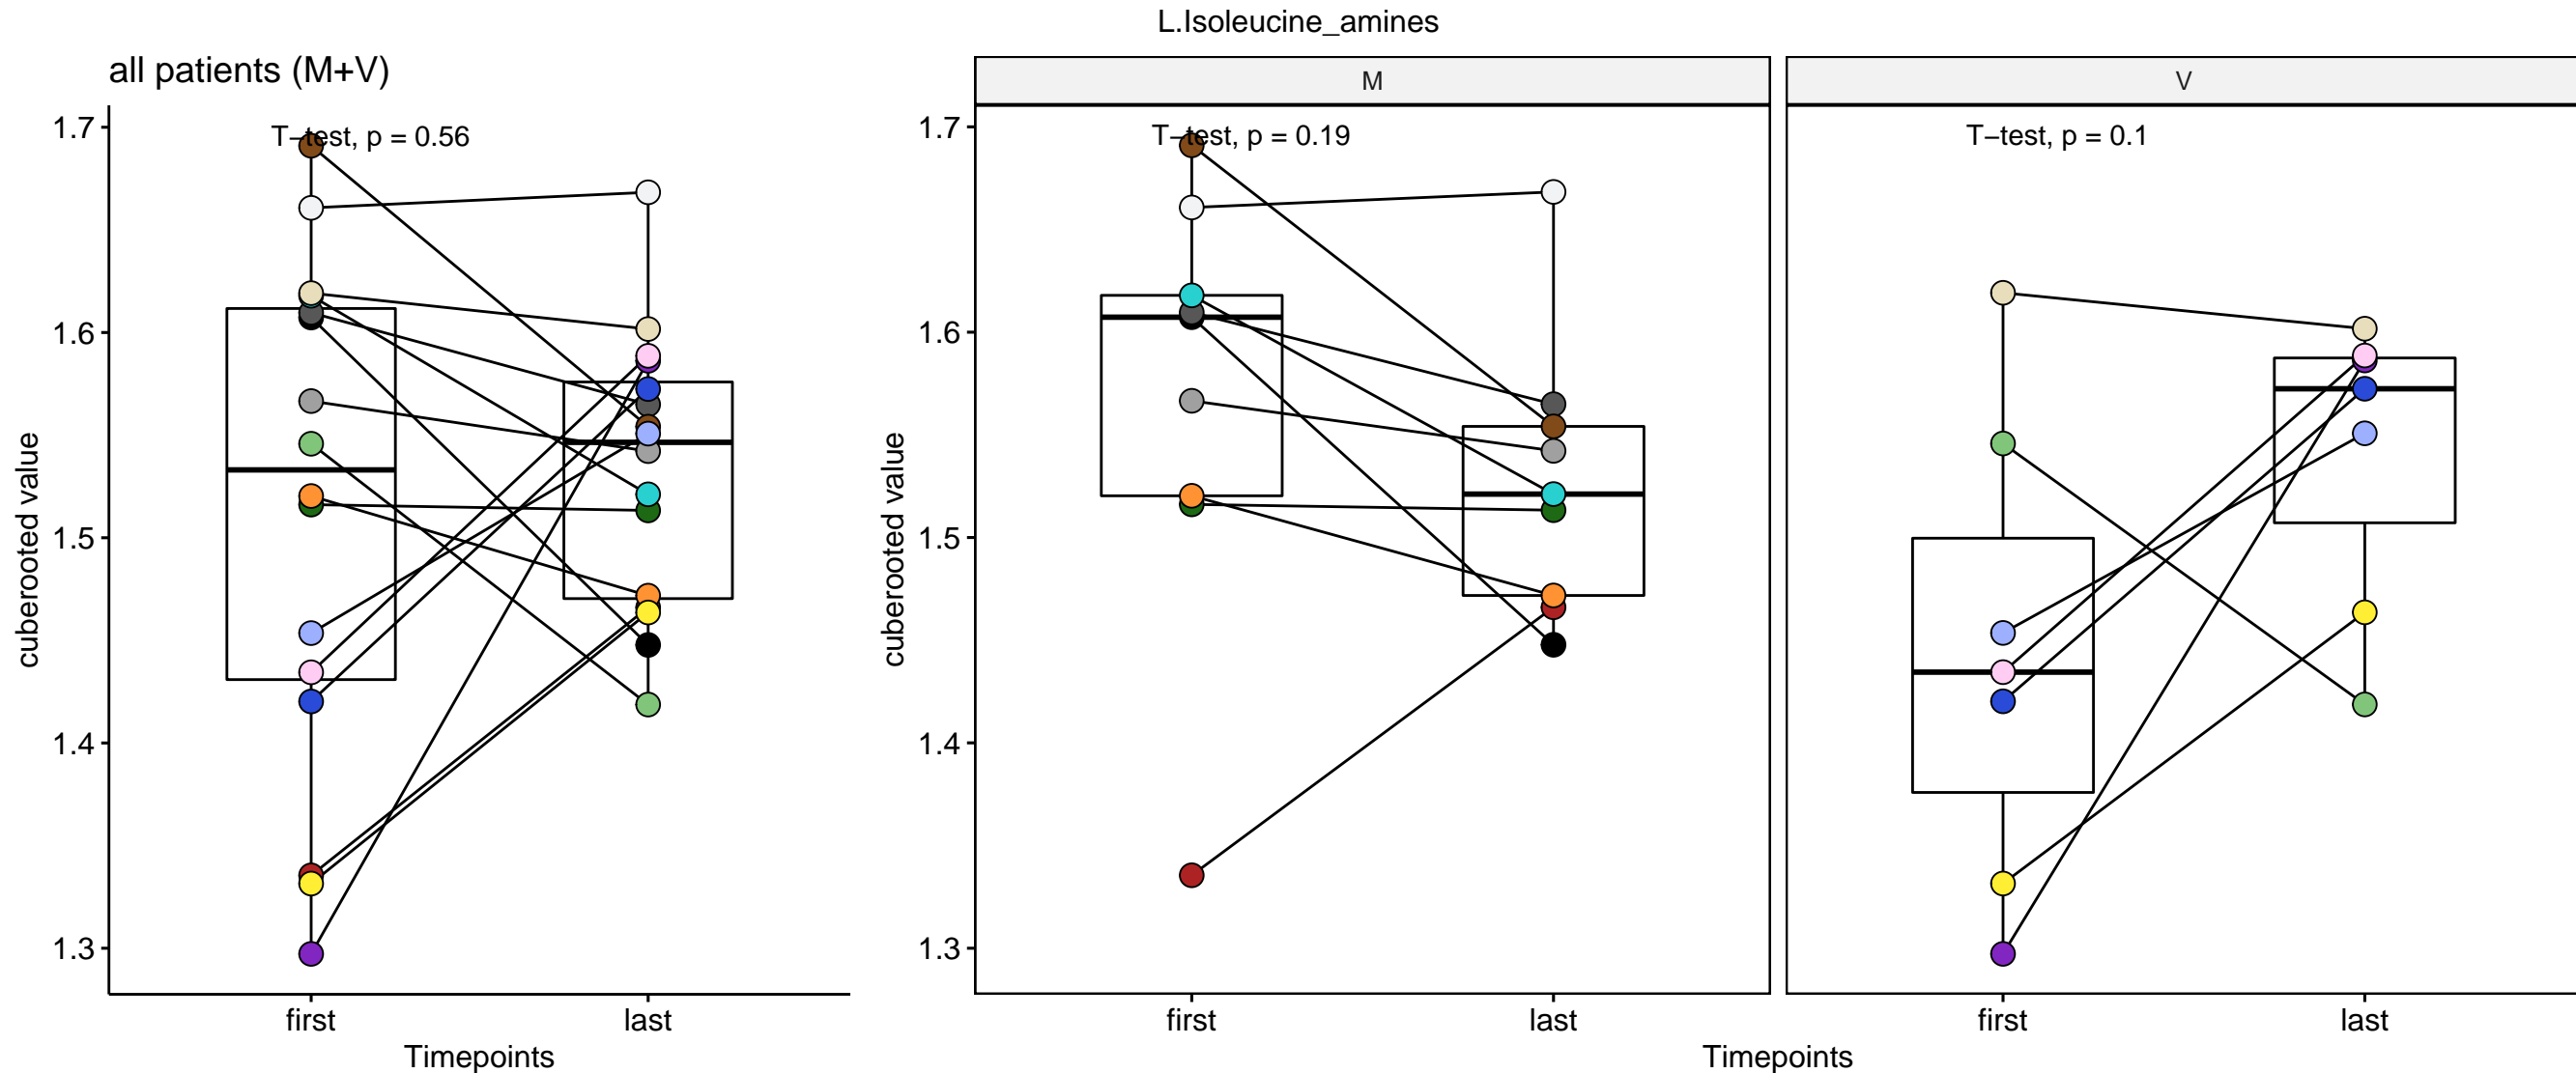

PatID

|              |               |              |              |
|--------------|---------------|--------------|--------------|
| 11_V68_8days | 18_V52_11days | 27_M71_4days | 40_V69_4days |
| 12_V73_7days | 21_V53_9days  | 28_V53_6days | 41_M70_6days |
| 13_M74_4days | 22_M65_3days  | 30_M49_5days | 44_M57_5days |
| 15_M71_7days | 25_M87_3days  | 32_V69_3days | 6d_M79_8days |

# L.Leucine\_amines

all patients (M+V)

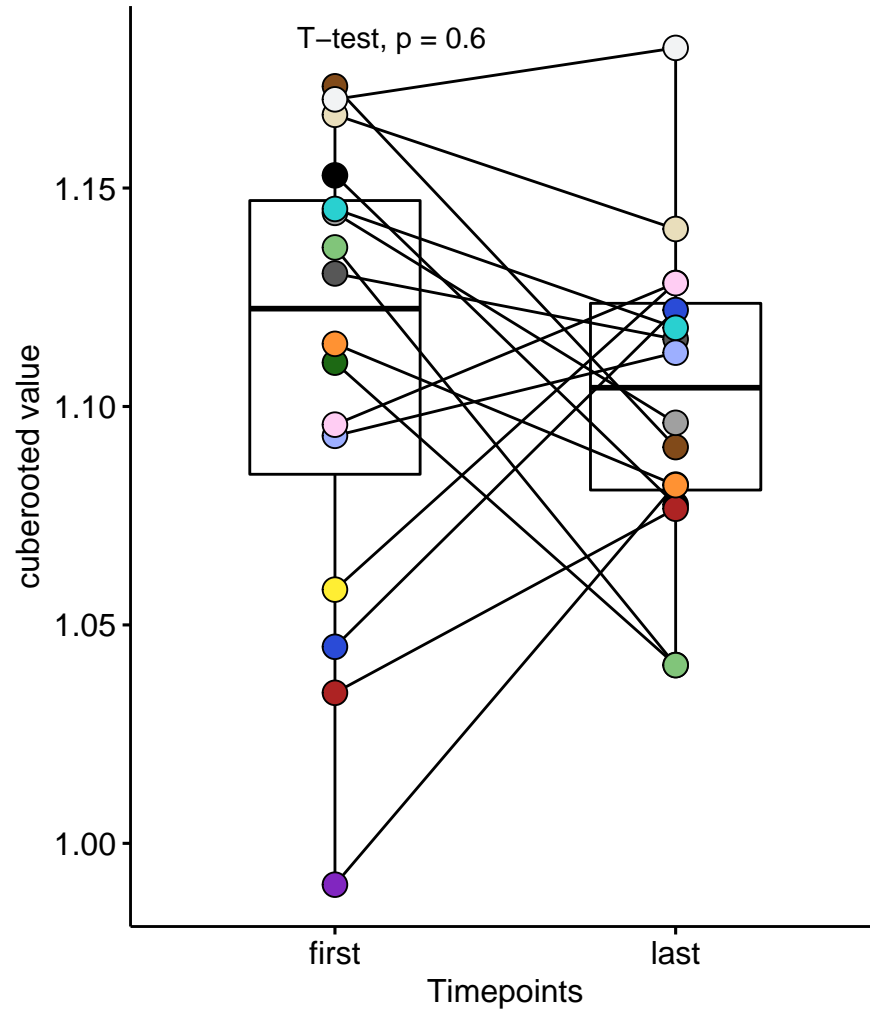

PatID

|              |               |              |              |
|--------------|---------------|--------------|--------------|
| 11_V68_8days | 18_V52_11days | 27_M71_4days | 40_V69_4days |
| 12_V73_7days | 21_V53_9days  | 28_V53_6days | 41_M70_6days |
| 13_M74_4days | 22_M65_3days  | 30_M49_5days | 44_M57_5days |
| 15_M71_7days | 25_M87_3days  | 32_V69_3days | 6d_M79_8days |

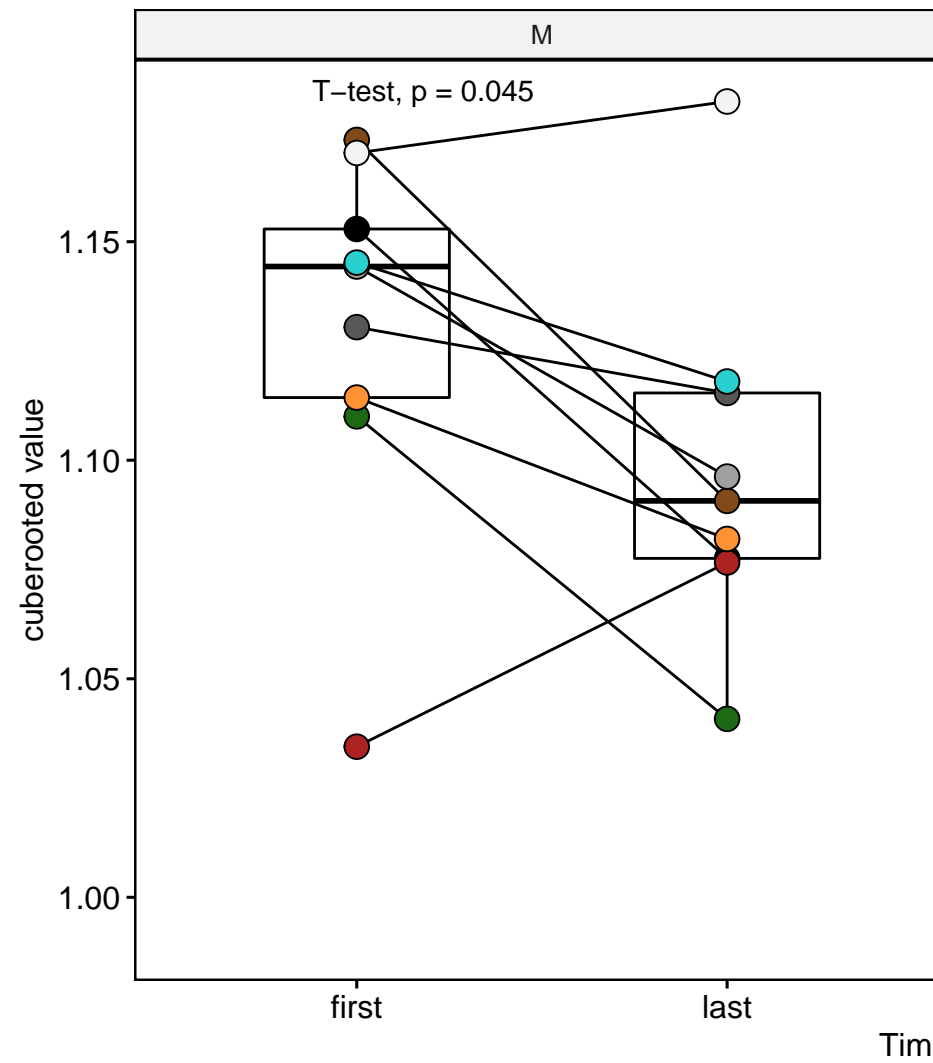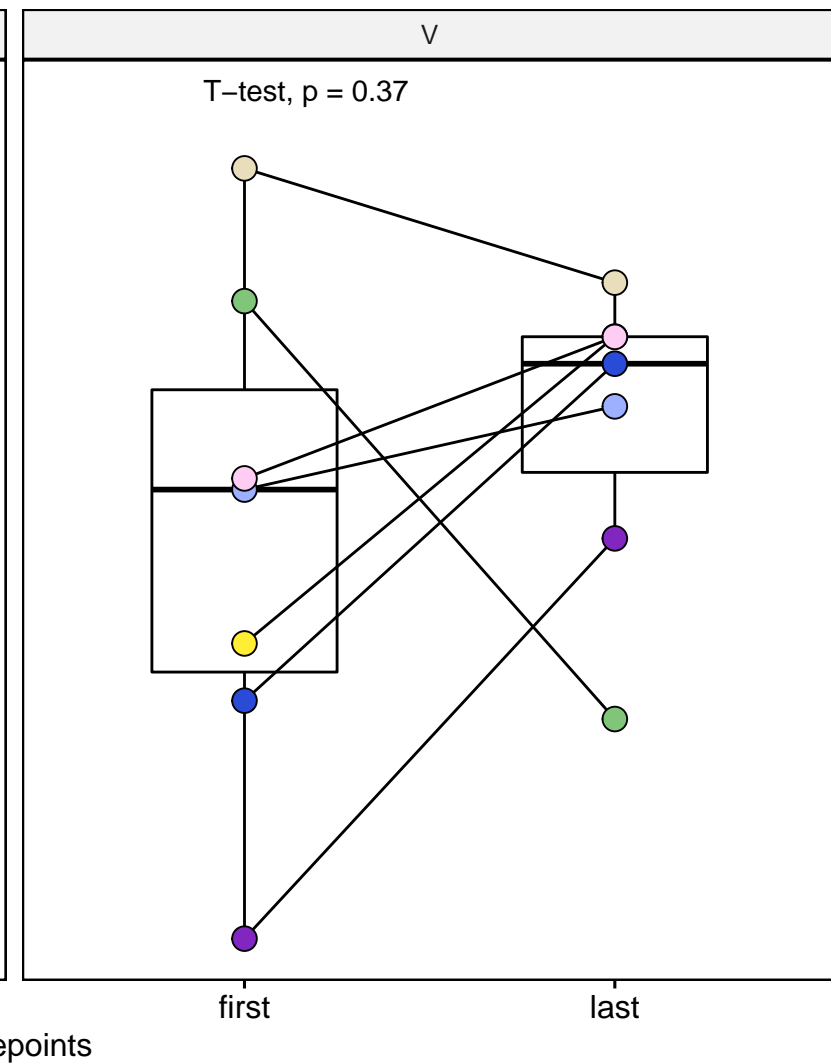

# L.Valine\_amines

all patients (M+V)

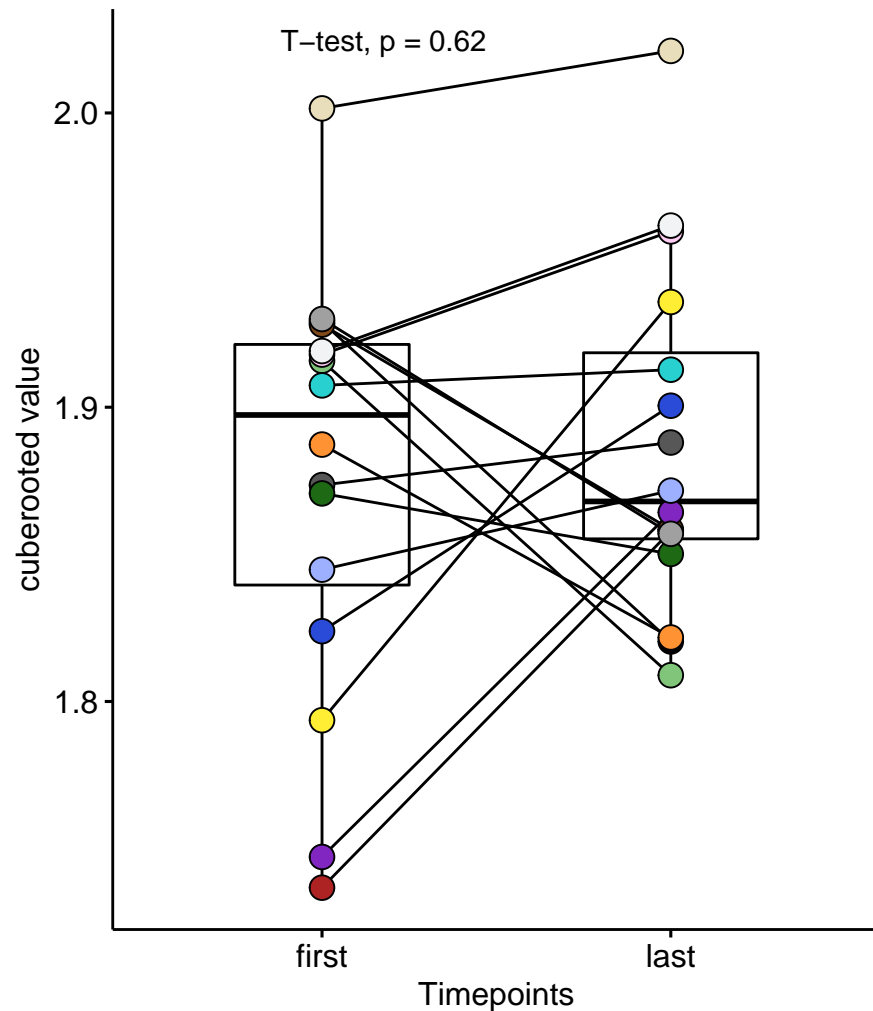

- PatID
- |              |               |              |              |
|--------------|---------------|--------------|--------------|
| 11_V68_8days | 18_V52_11days | 27_M71_4days | 40_V69_4days |
| 12_V73_7days | 21_V53_9days  | 28_V53_6days | 41_M70_6days |
| 13_M74_4days | 22_M65_3days  | 30_M49_5days | 44_M57_5days |
| 15_M71_7days | 25_M87_3days  | 32_V69_3days | 6d_M79_8days |

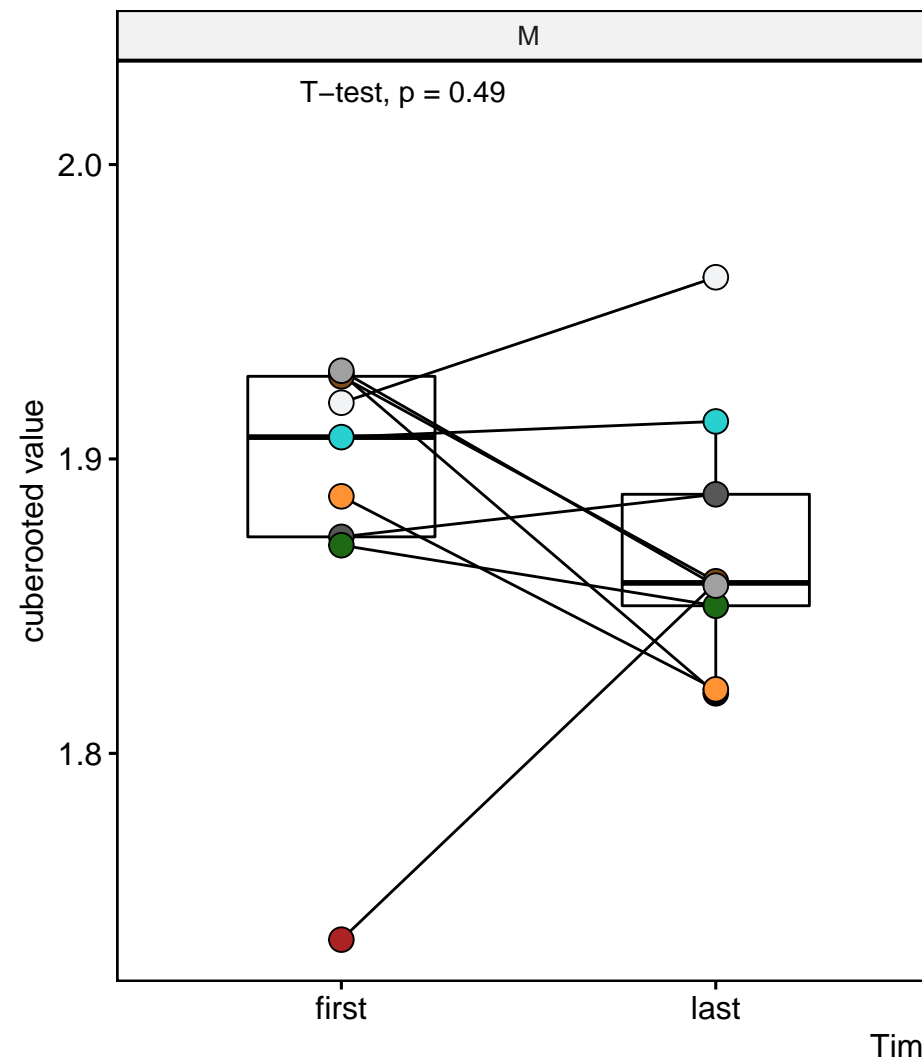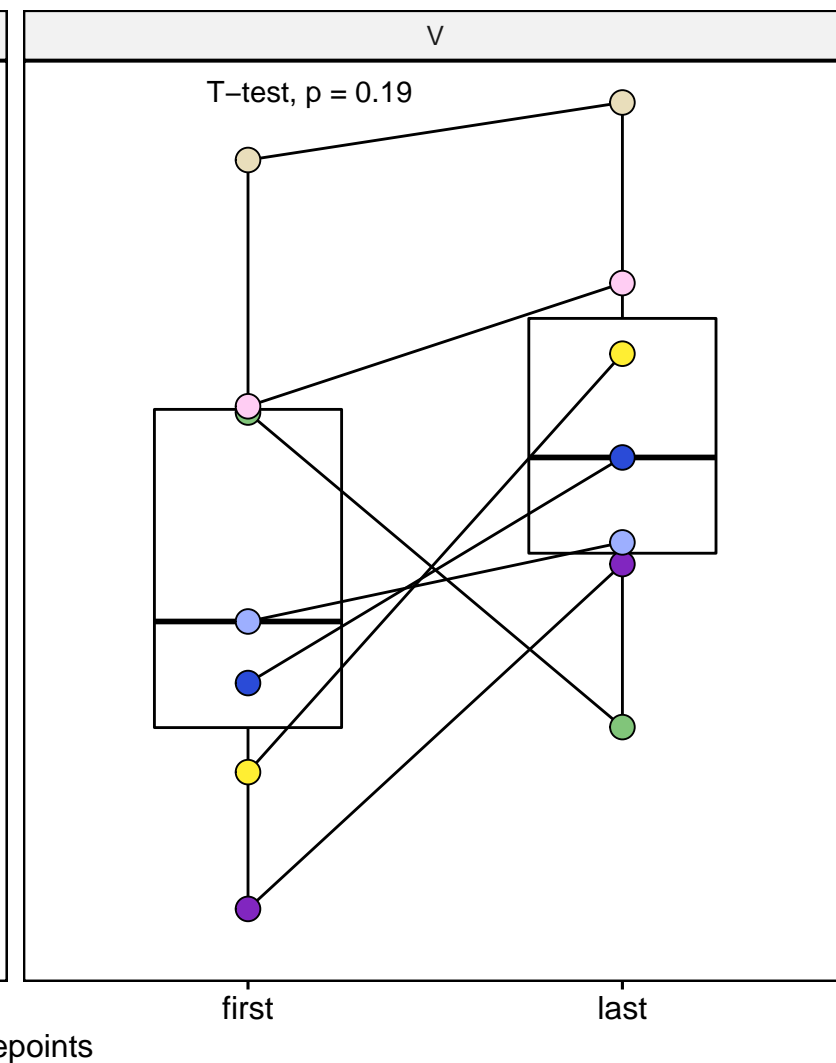

all patients (M+V)

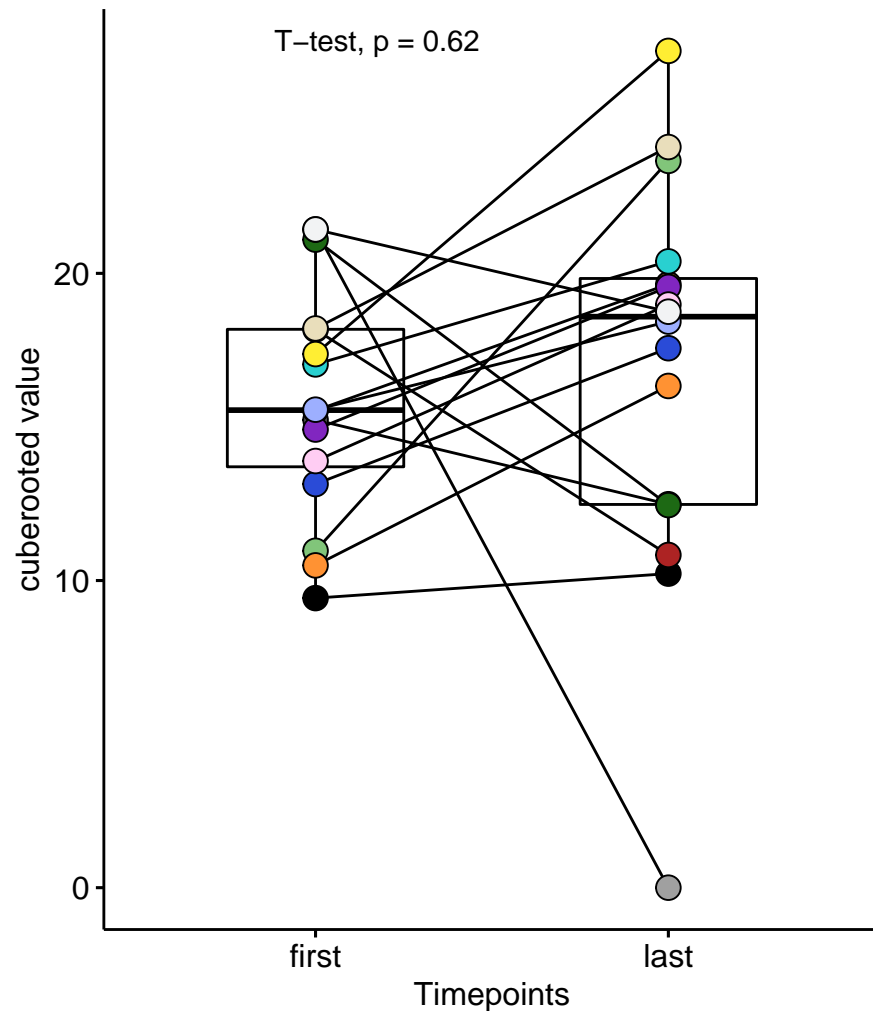

IL1RA

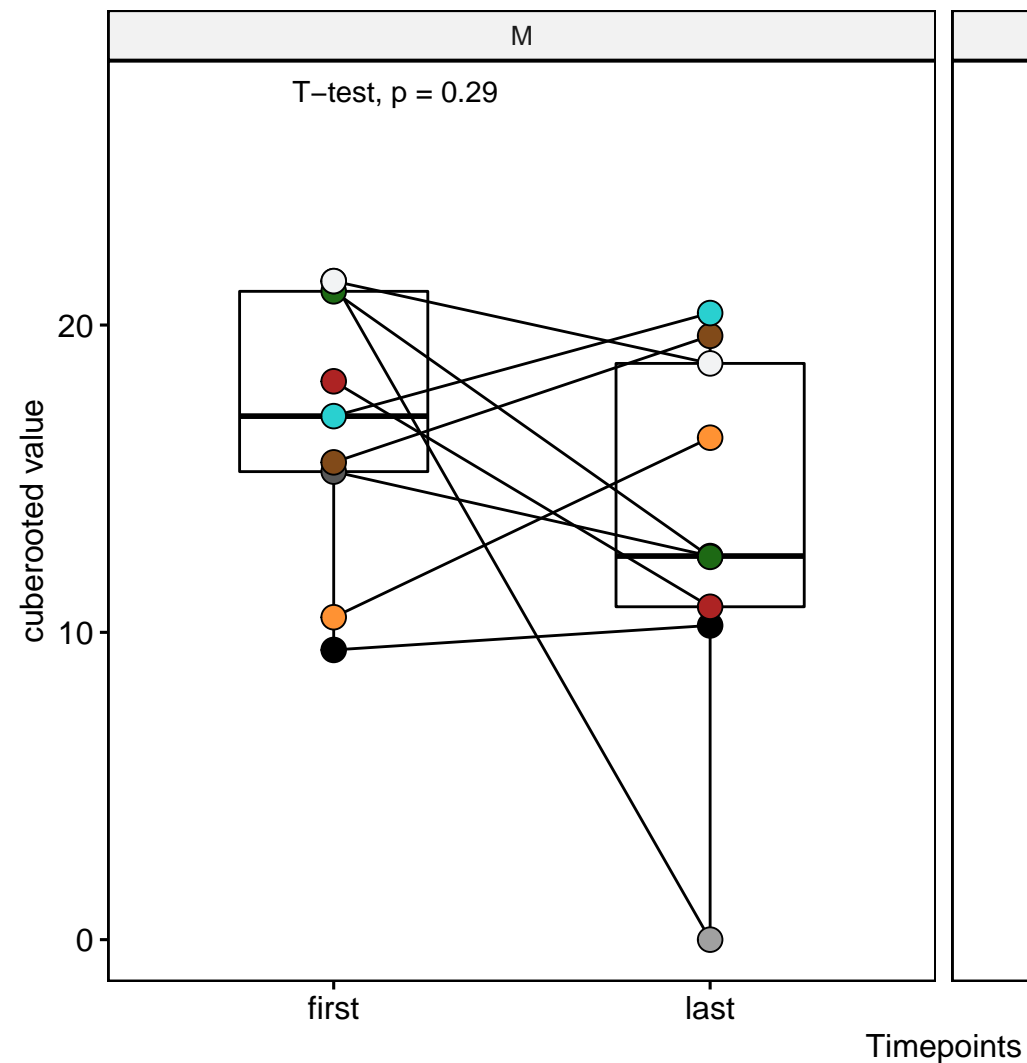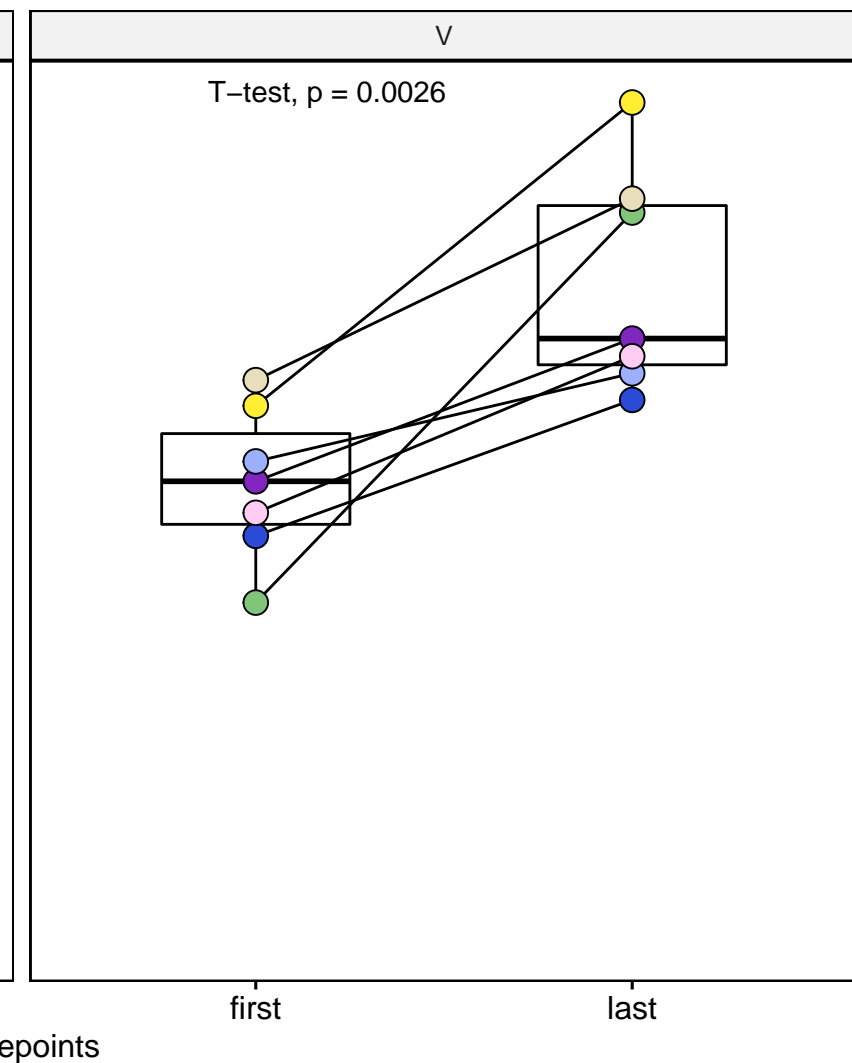

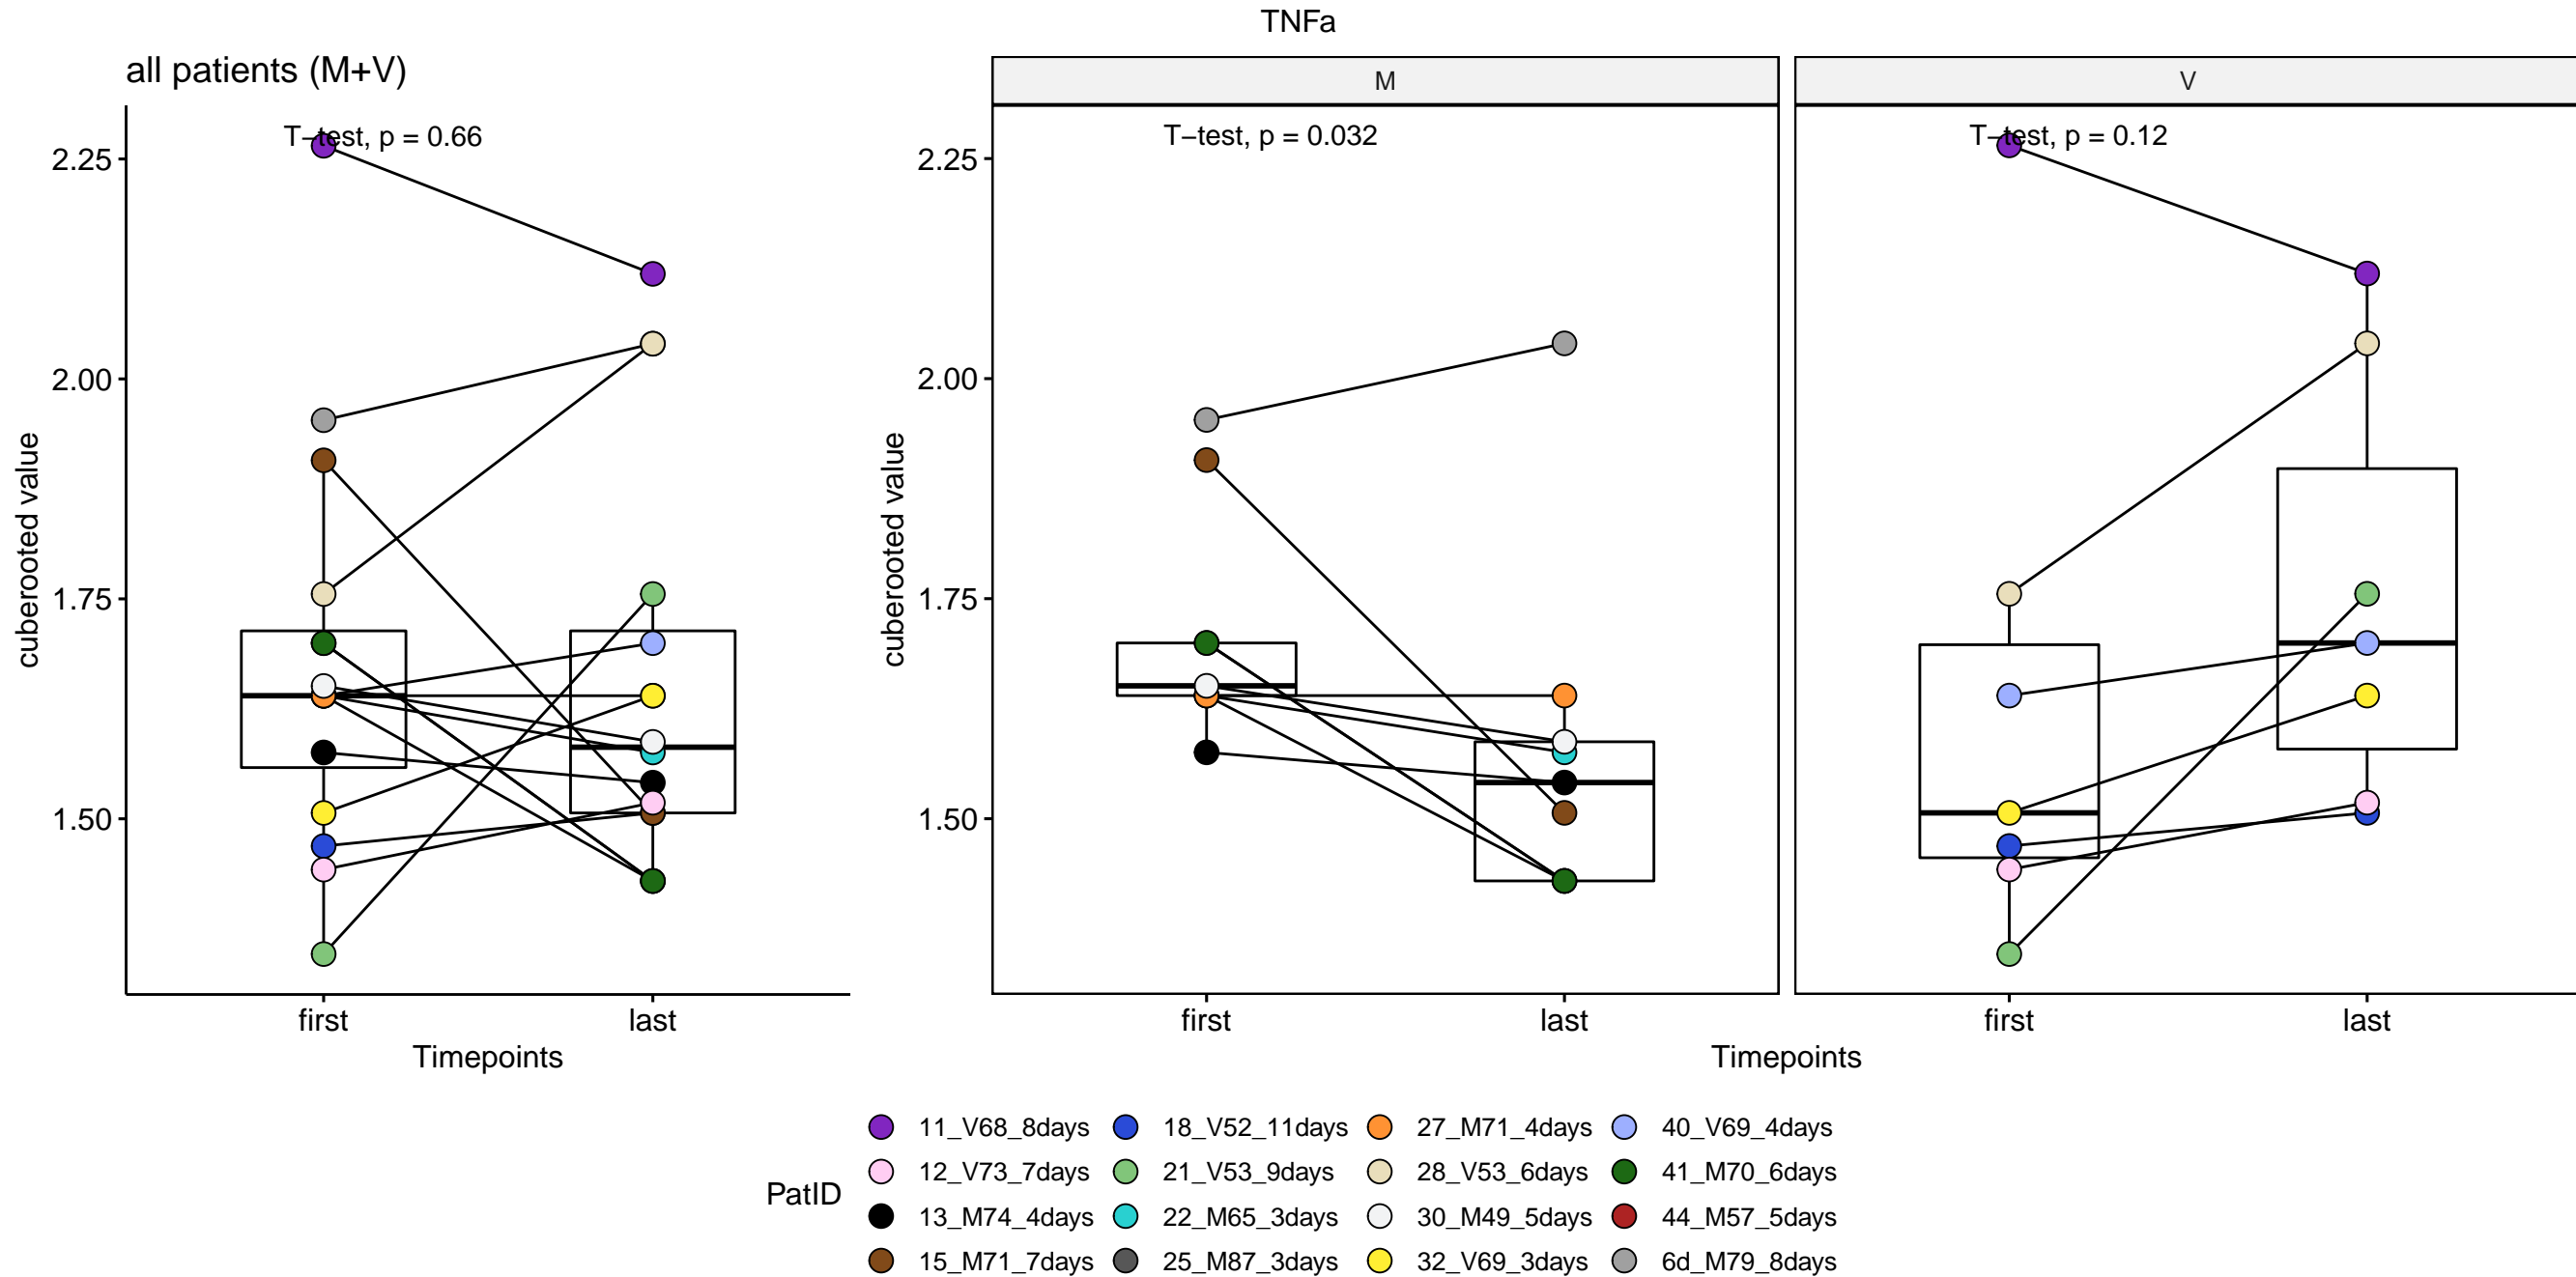

all patients (M+V)

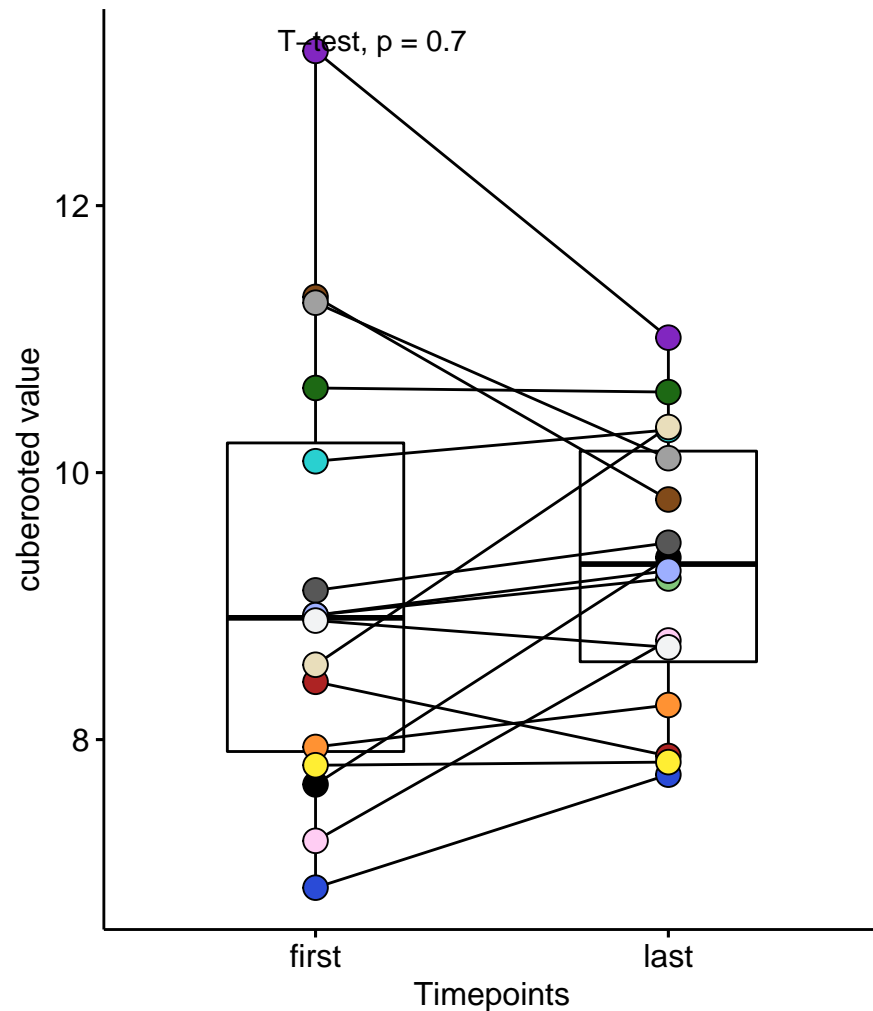

sHMr

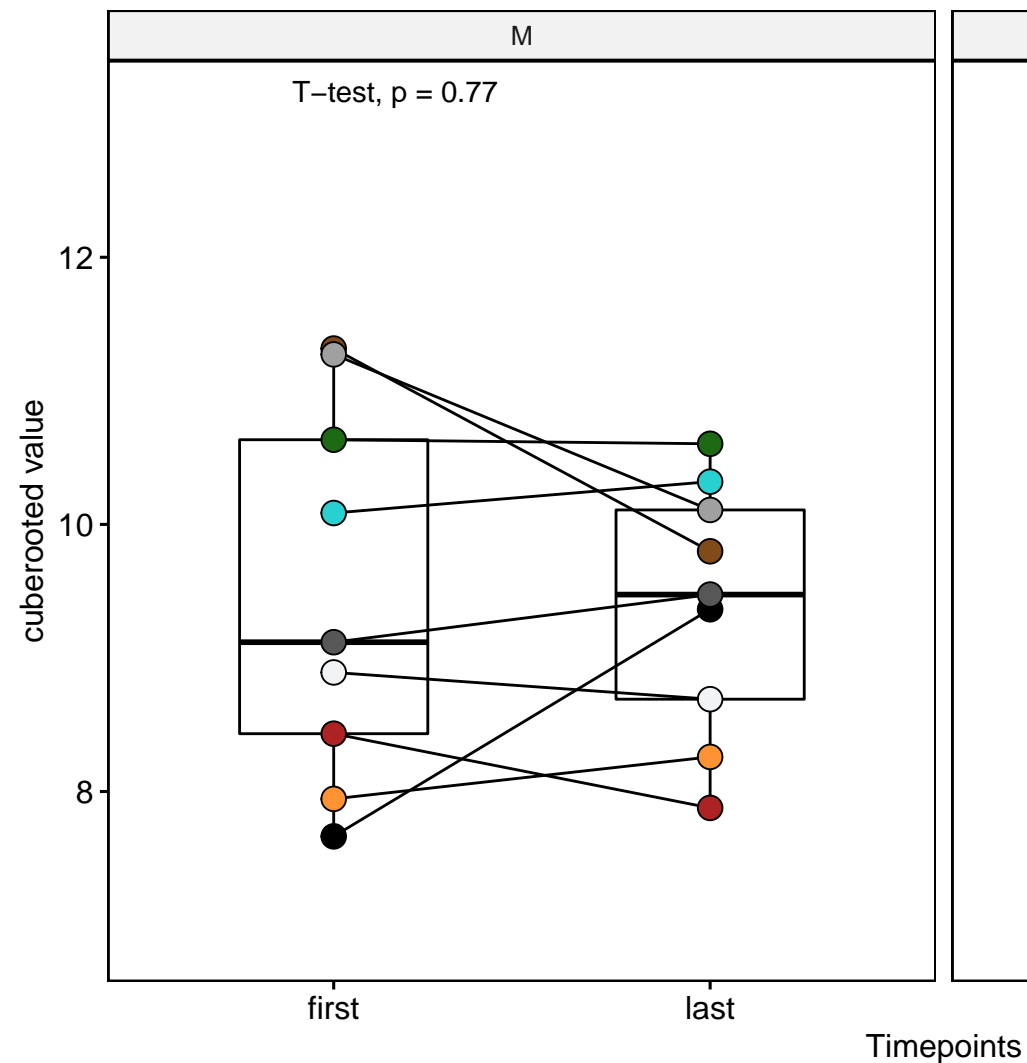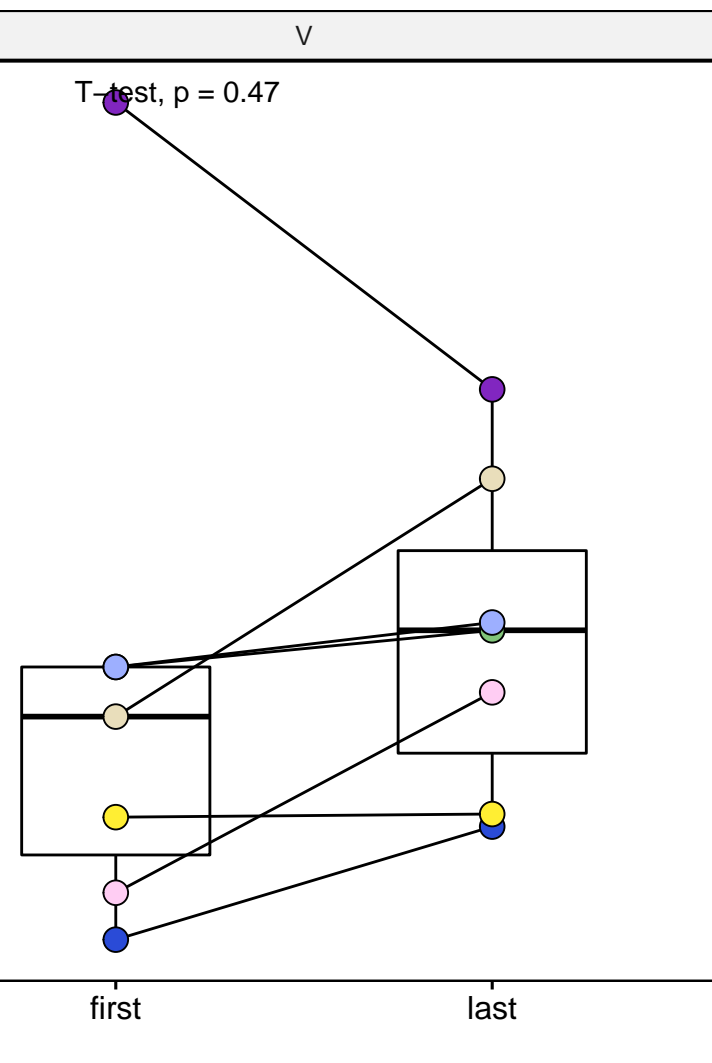

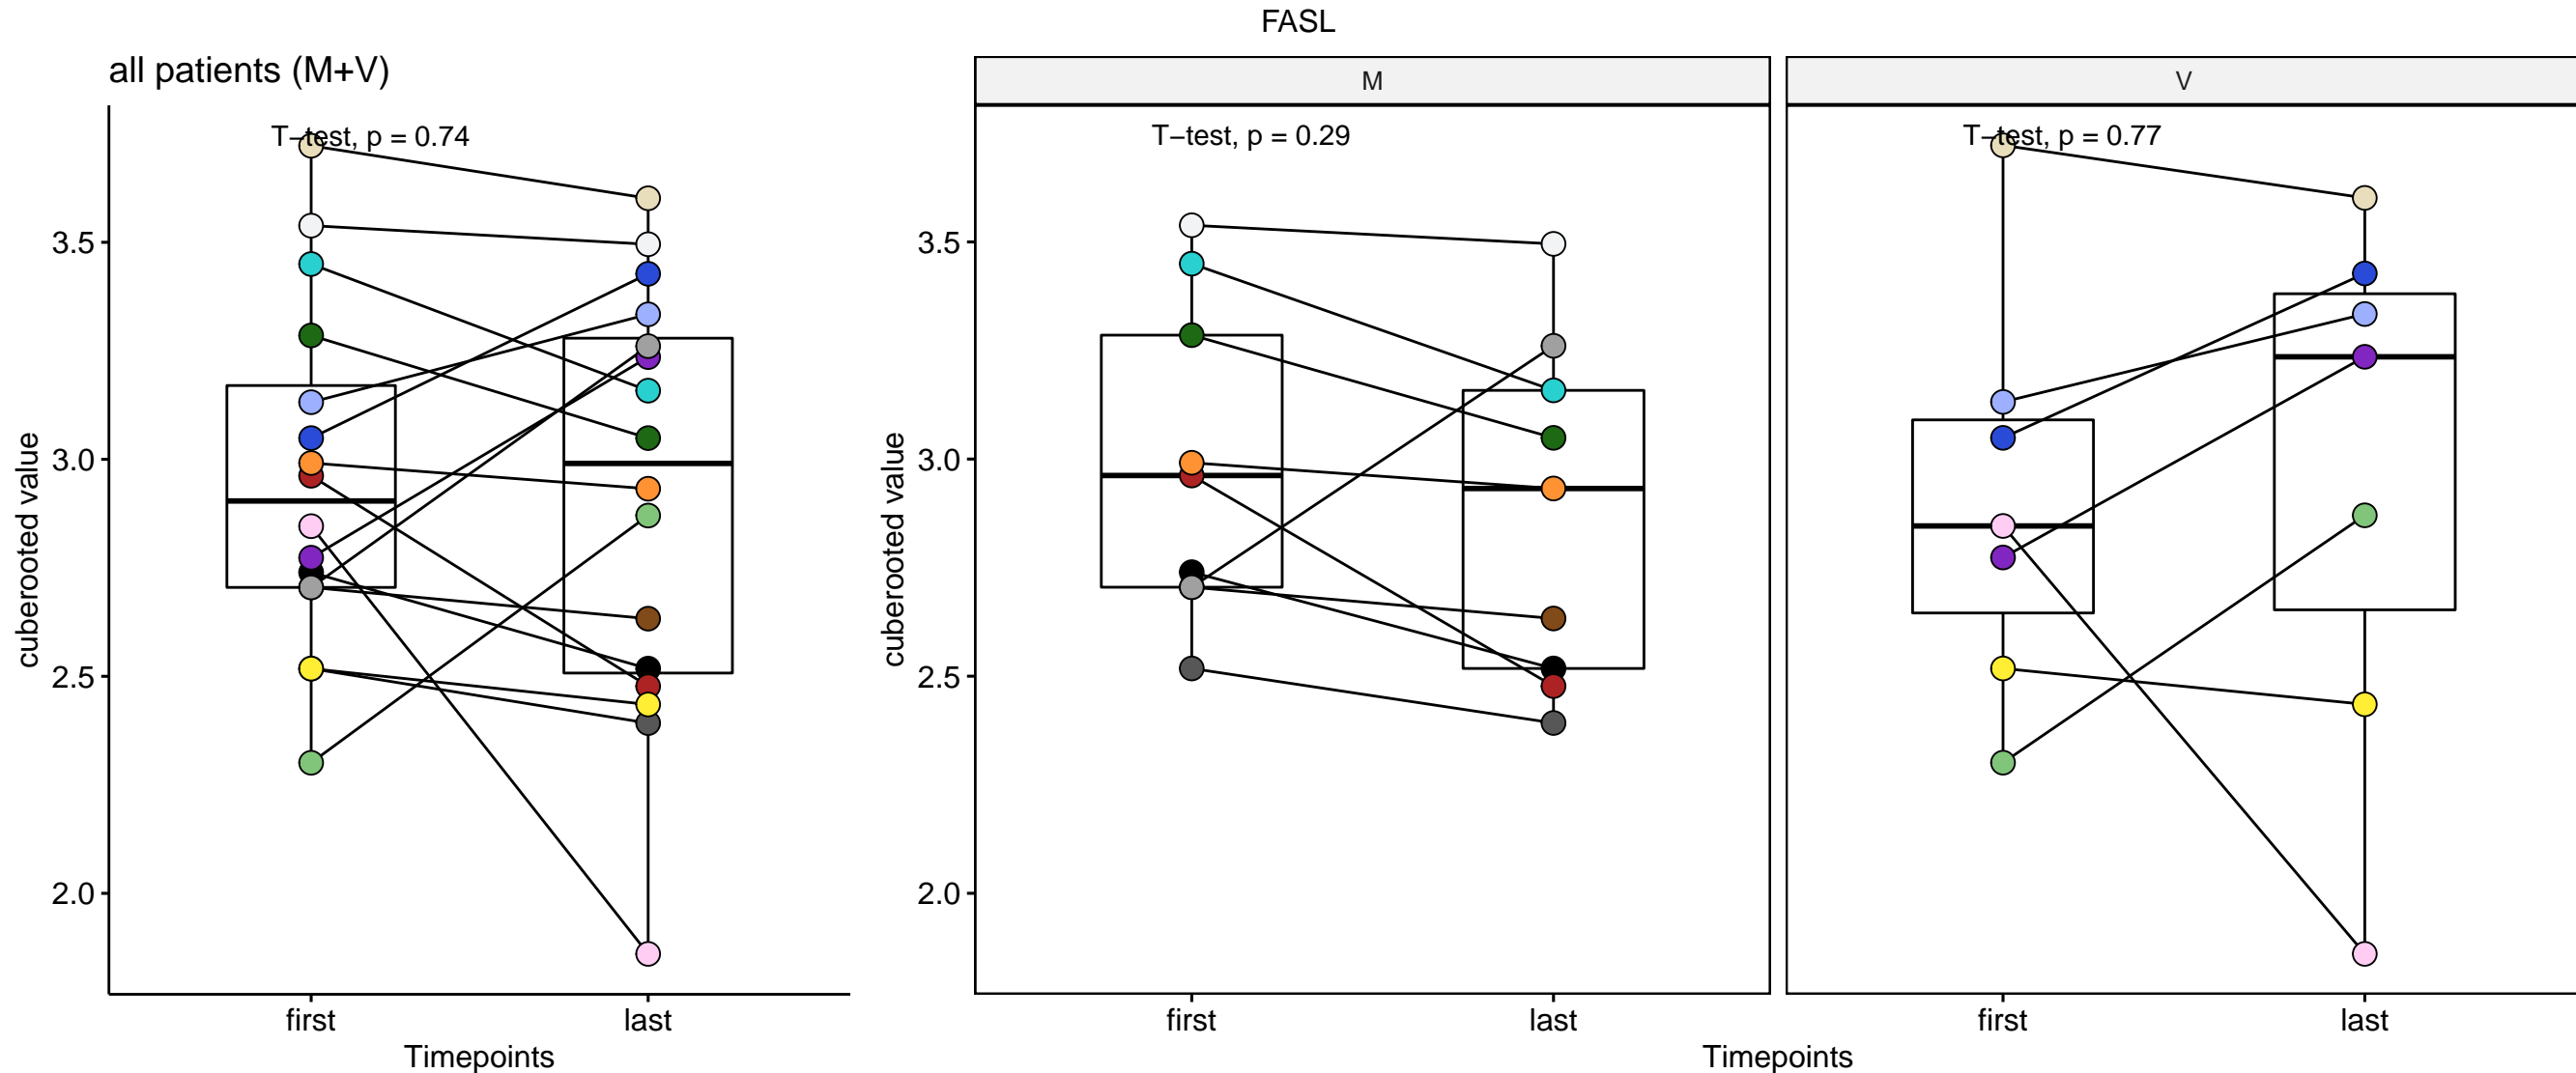

PatID

|              |               |              |              |
|--------------|---------------|--------------|--------------|
| 11_V68_8days | 18_V52_11days | 27_M71_4days | 40_V69_4days |
| 12_V73_7days | 21_V53_9days  | 28_V53_6days | 41_M70_6days |
| 13_M74_4days | 22_M65_3days  | 30_M49_5days | 44_M57_5days |
| 15_M71_7days | 25_M87_3days  | 32_V69_3days | 6d_M79_8days |



# L.Methionine\_amines

all patients (M+V)

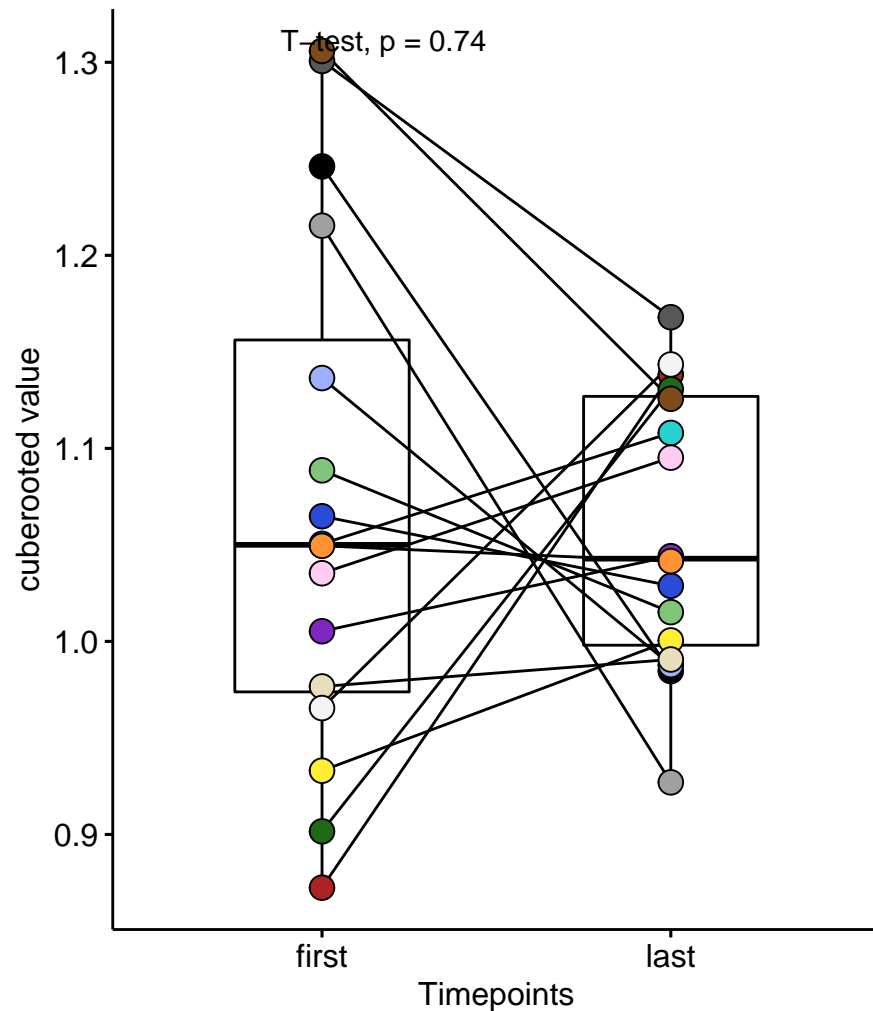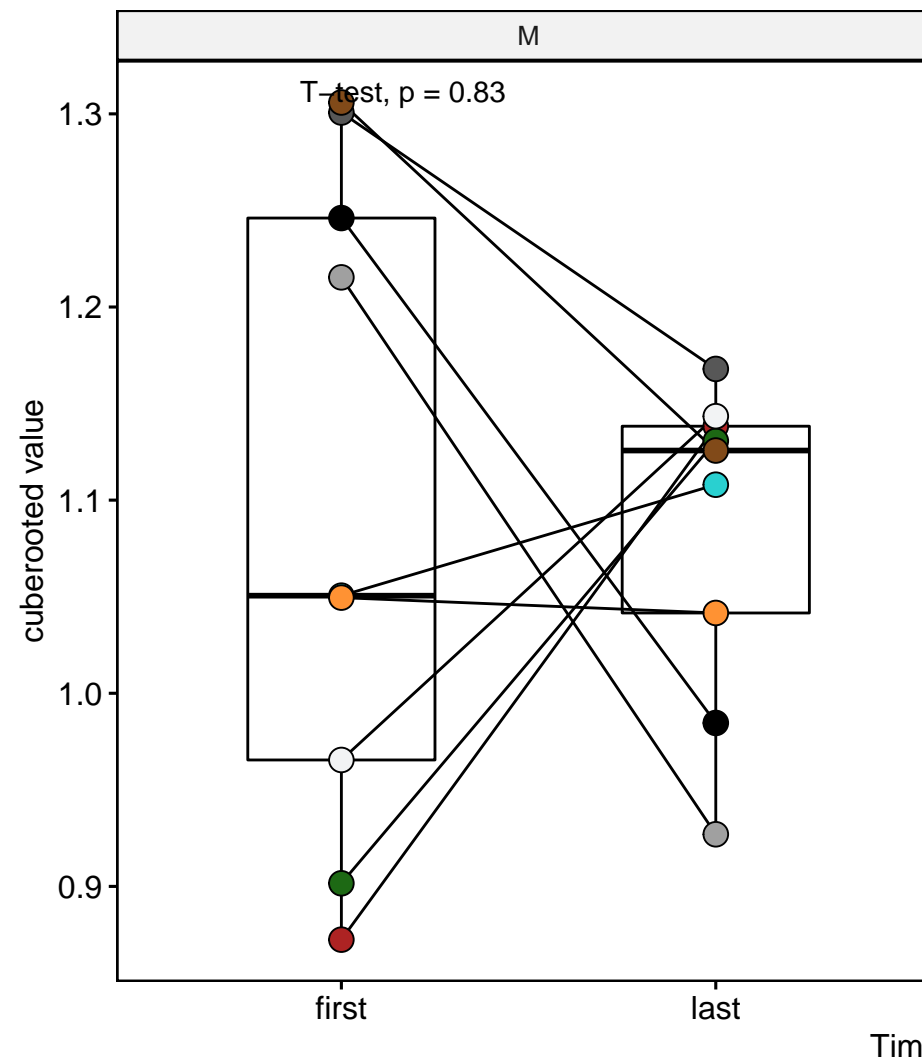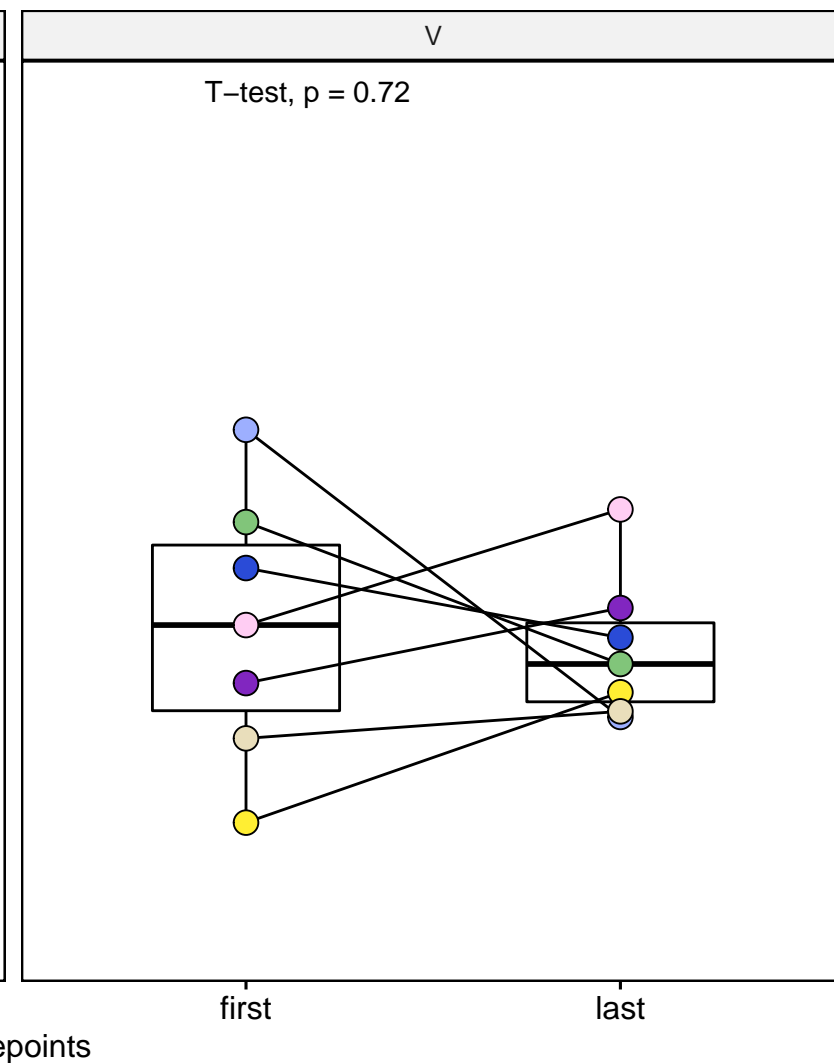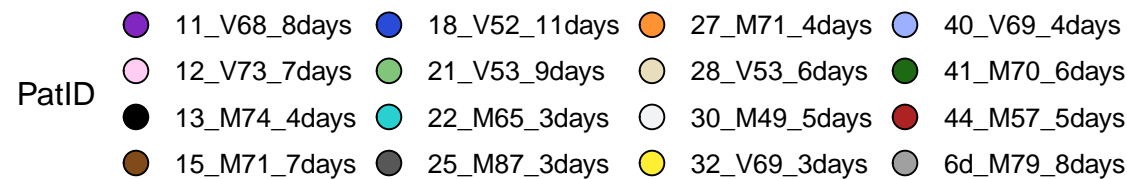

# L.Glutamine\_amines

all patients (M+V)

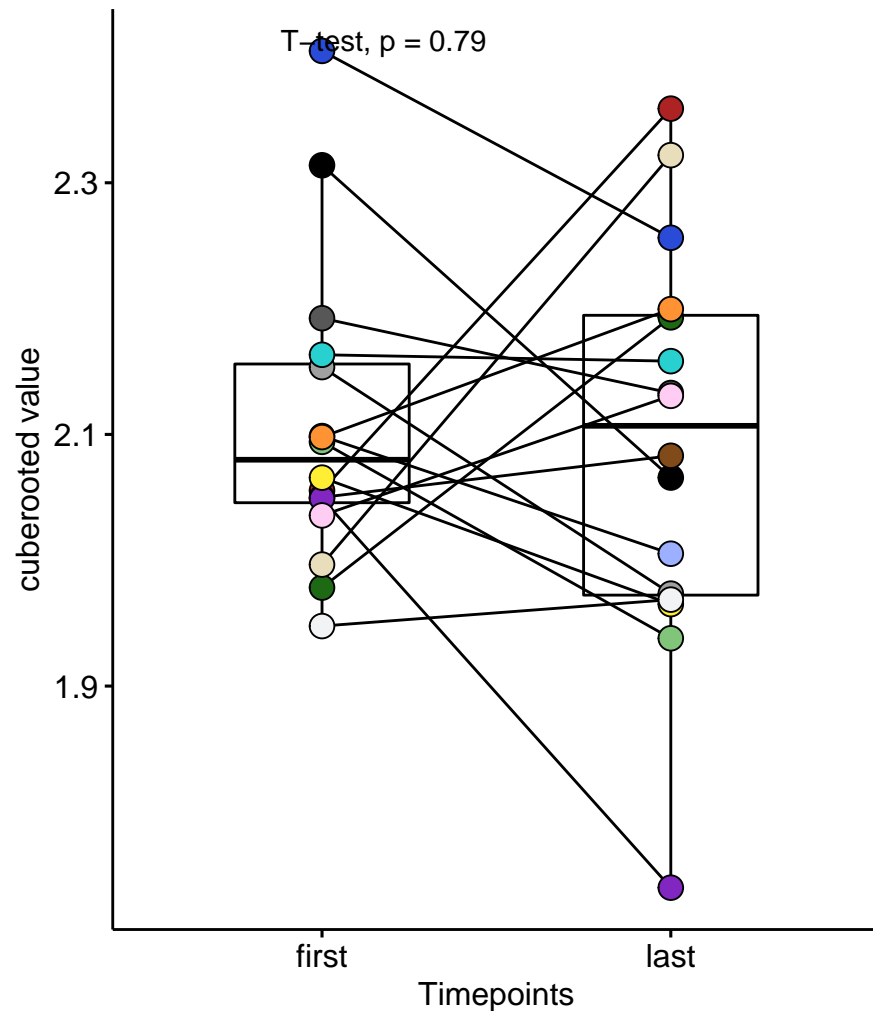

PatID

|              |               |              |              |
|--------------|---------------|--------------|--------------|
| 11_V68_8days | 18_V52_11days | 27_M71_4days | 40_V69_4days |
| 12_V73_7days | 21_V53_9days  | 28_V53_6days | 41_M70_6days |
| 13_M74_4days | 22_M65_3days  | 30_M49_5days | 44_M57_5days |
| 15_M71_7days | 25_M87_3days  | 32_V69_3days | 6d_M79_8days |

M

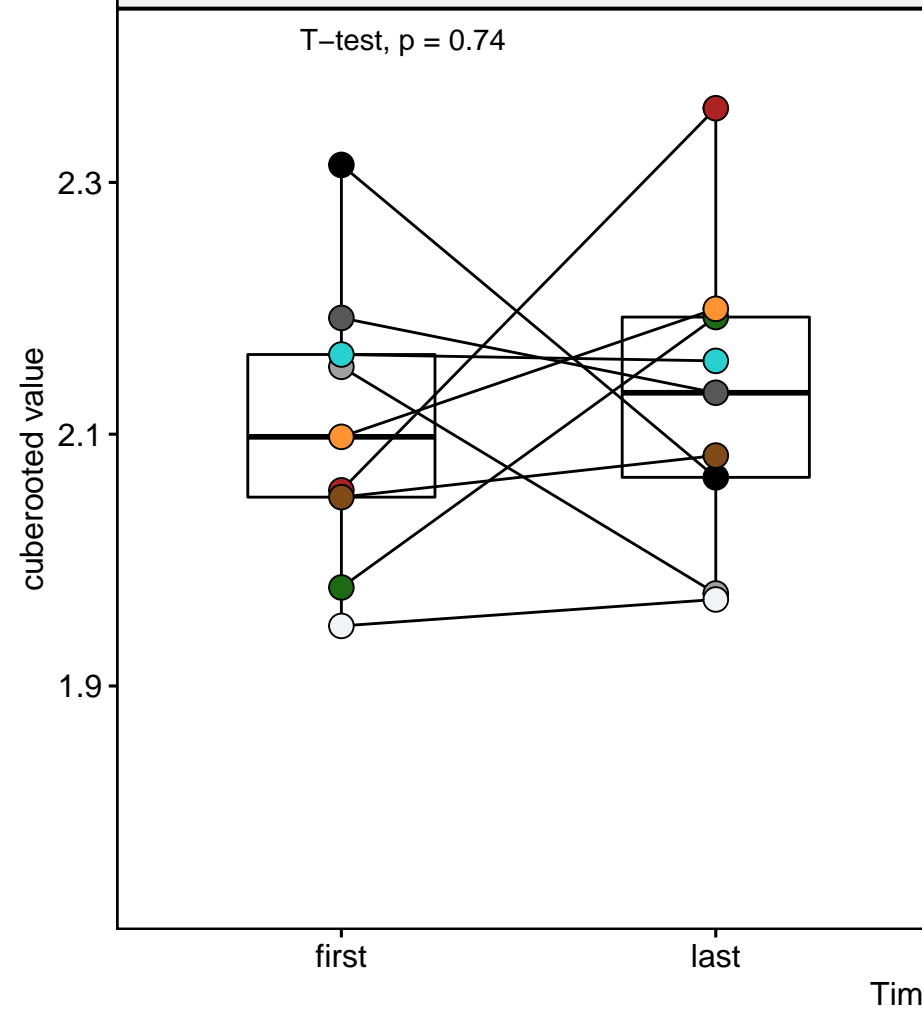

V

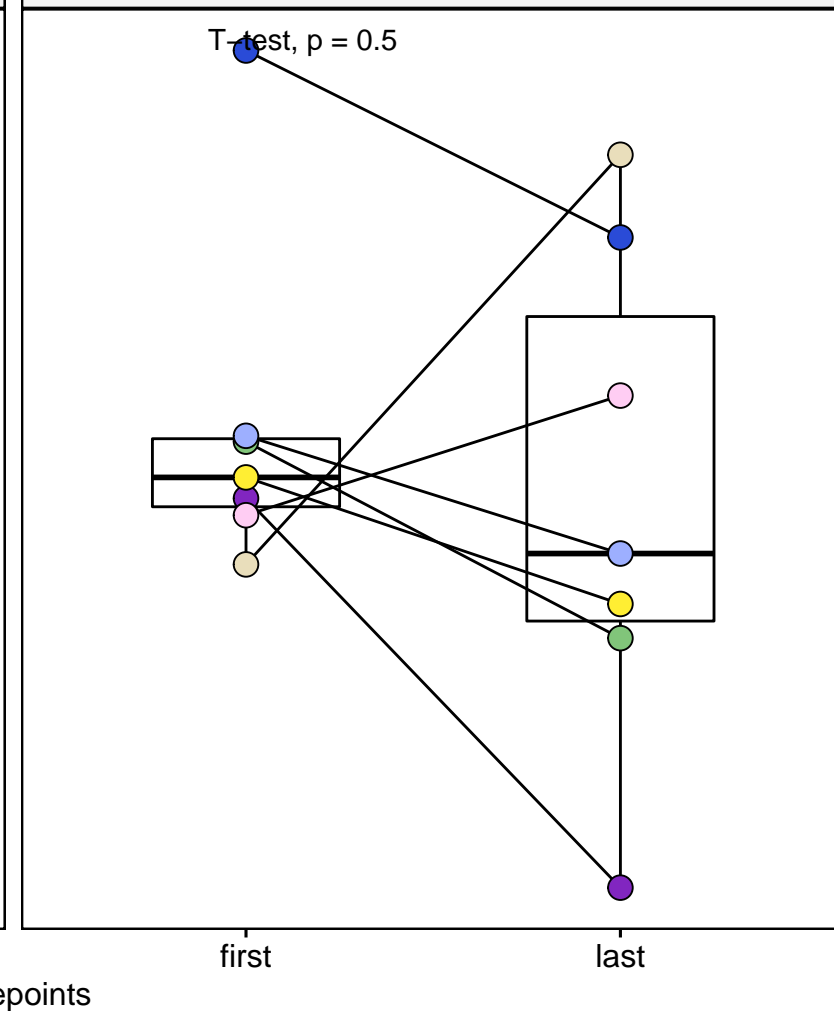

# L.2.aminoadipic.acid\_amines

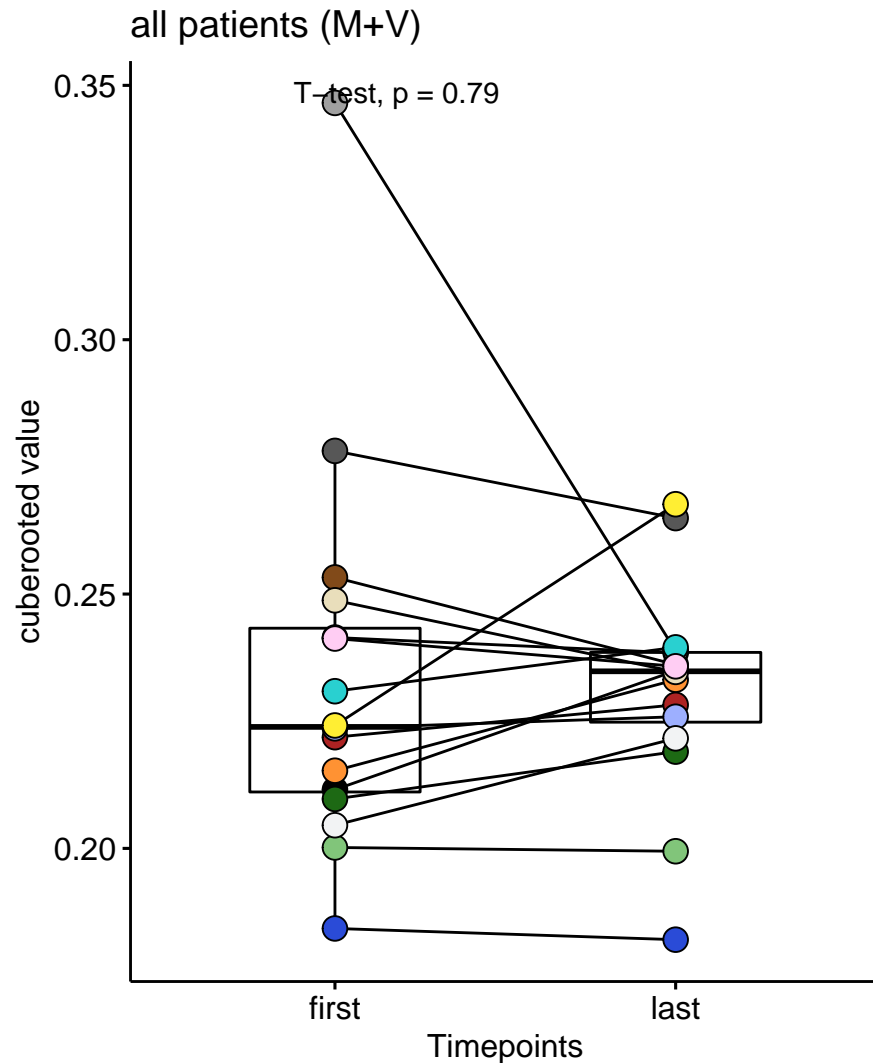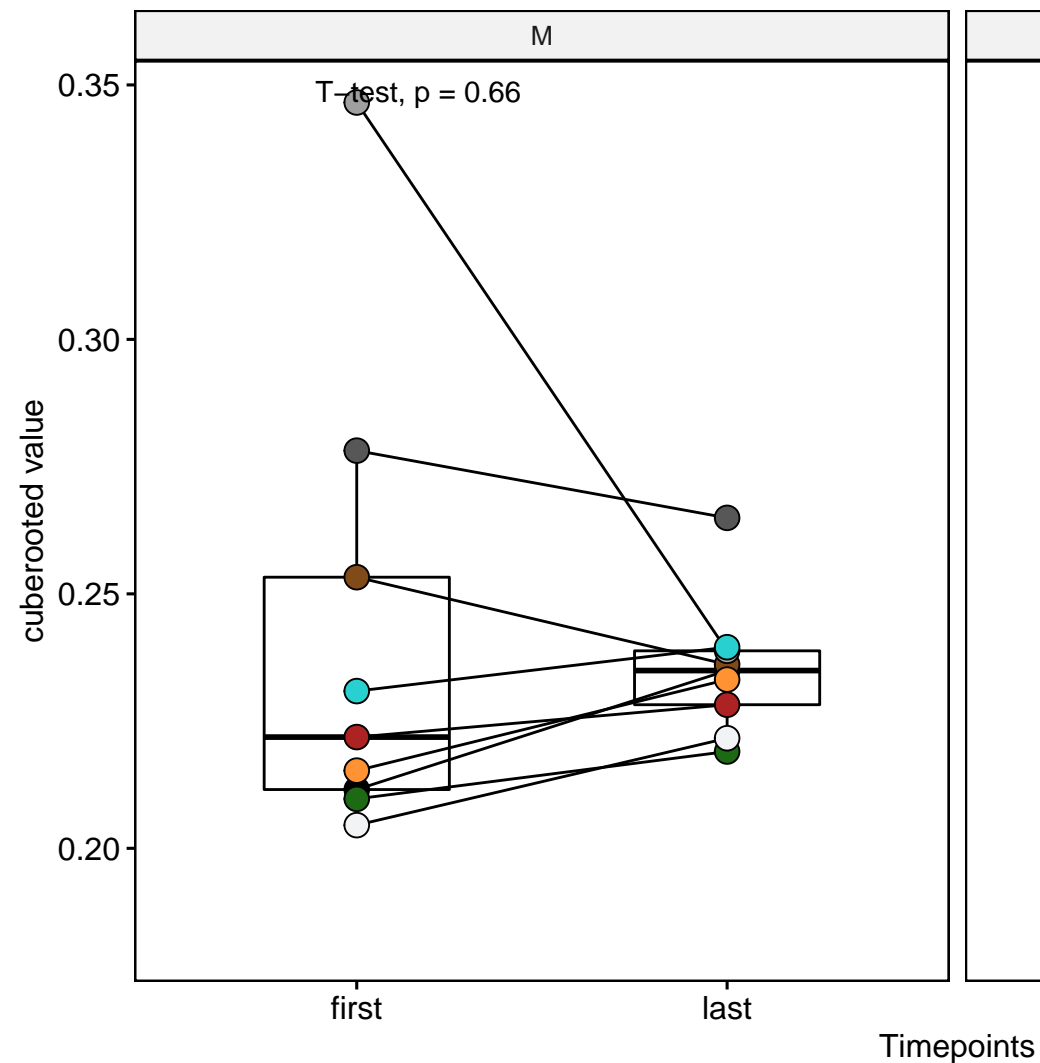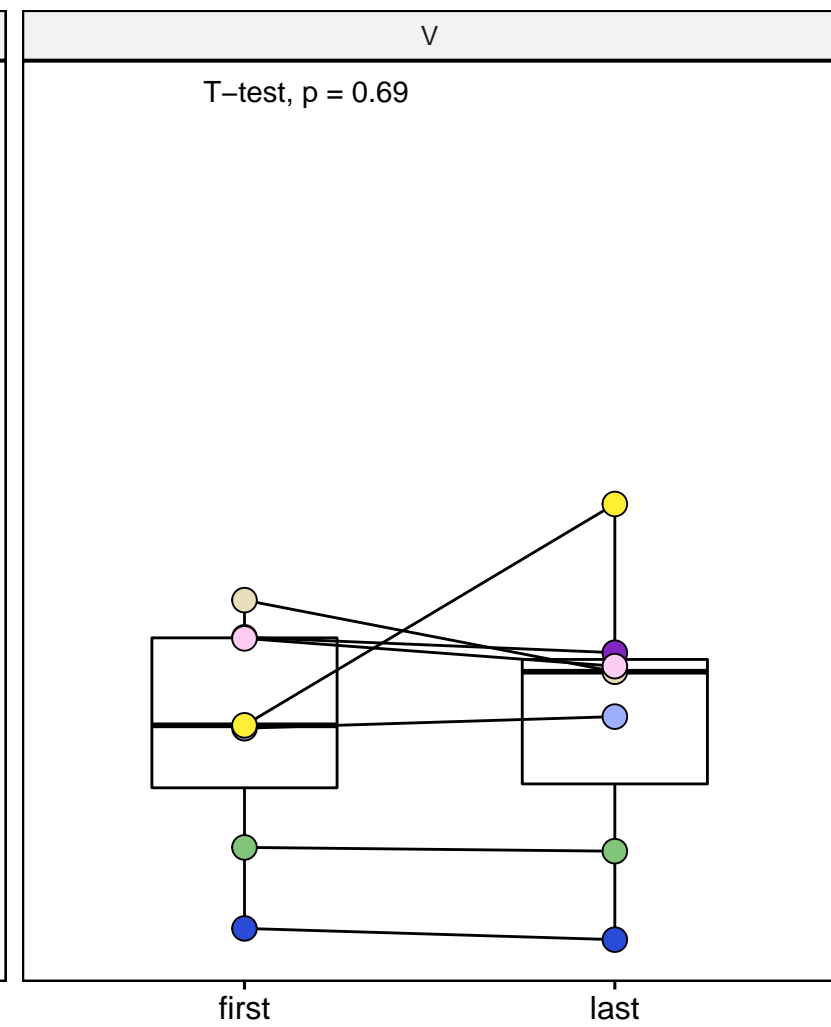

all patients (M+V)

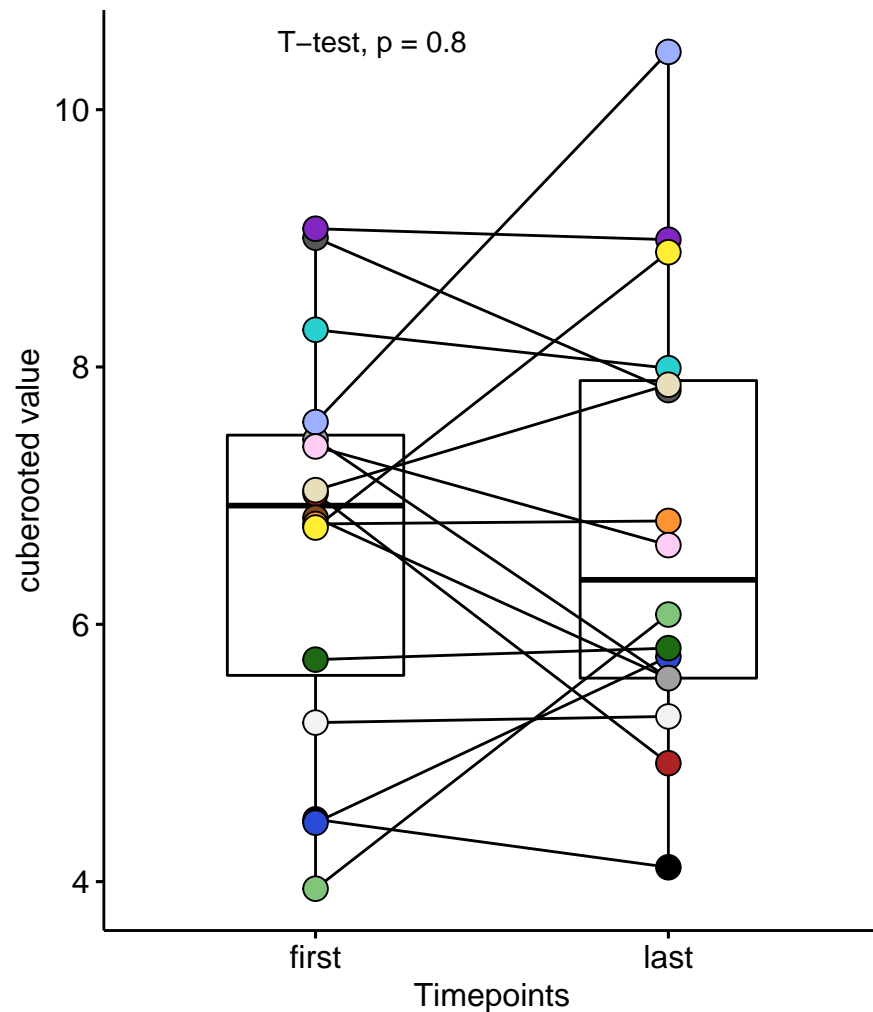

CCL2

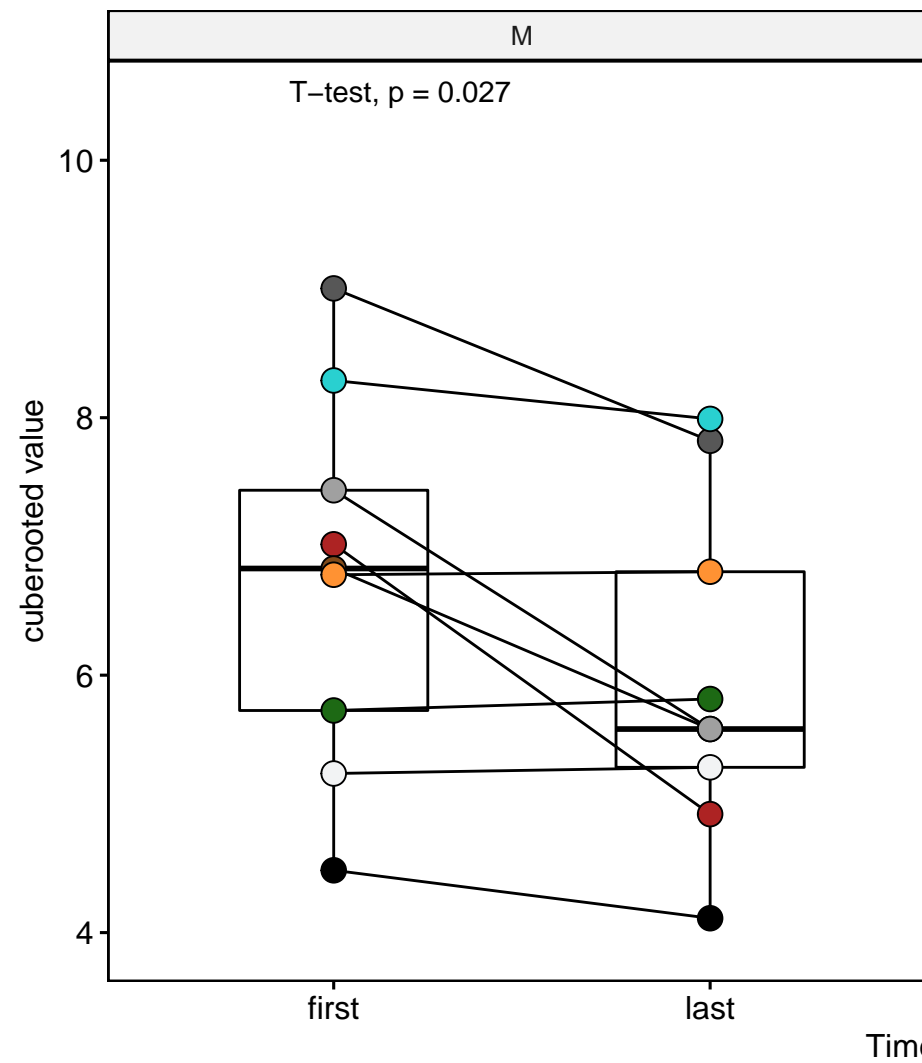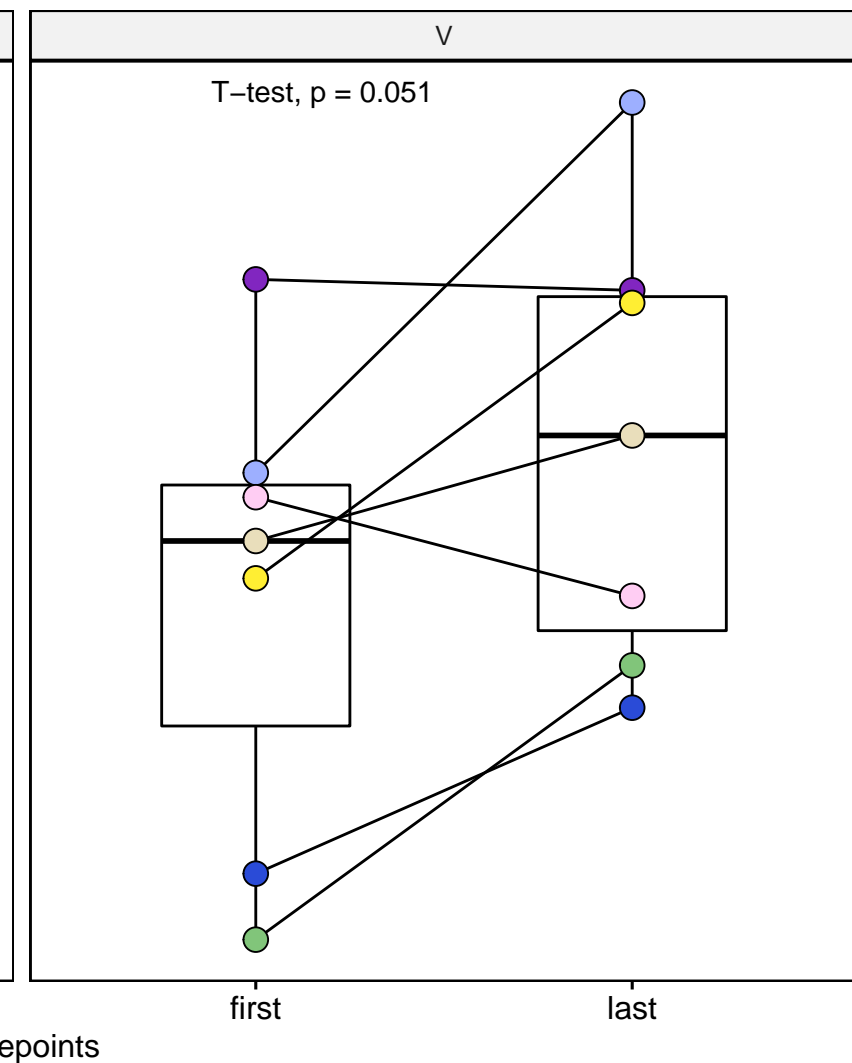

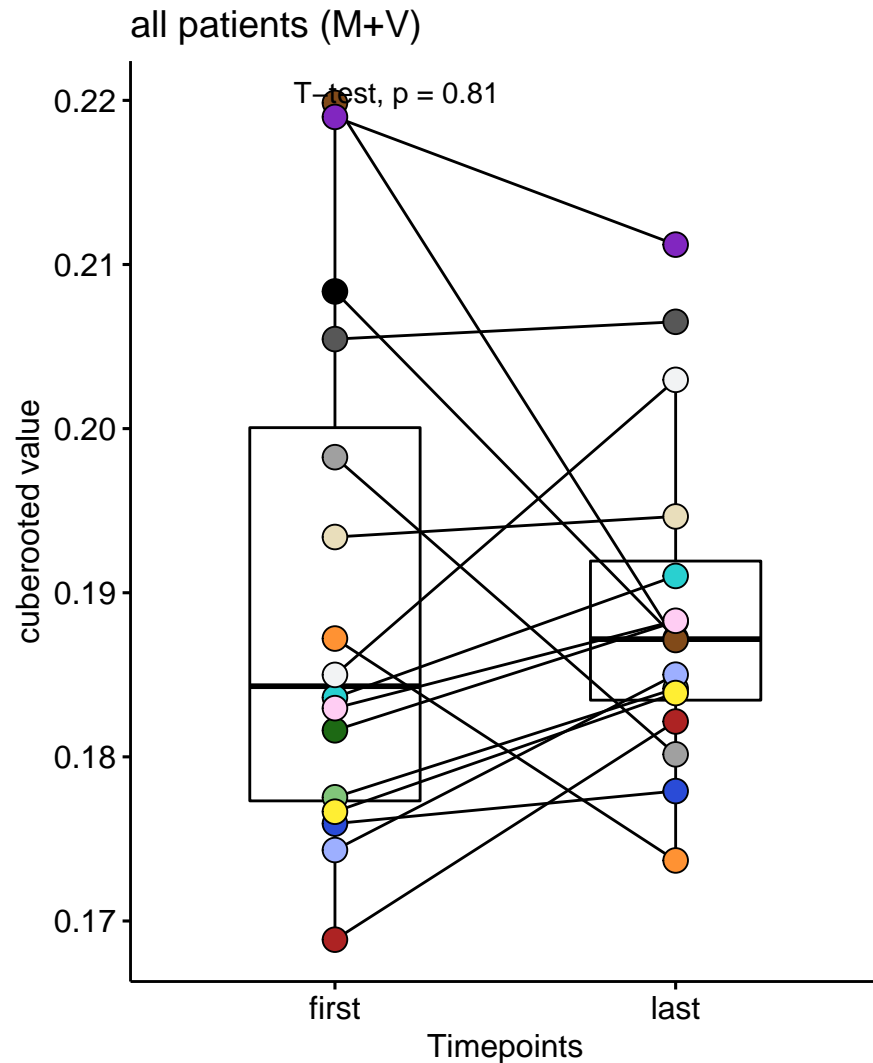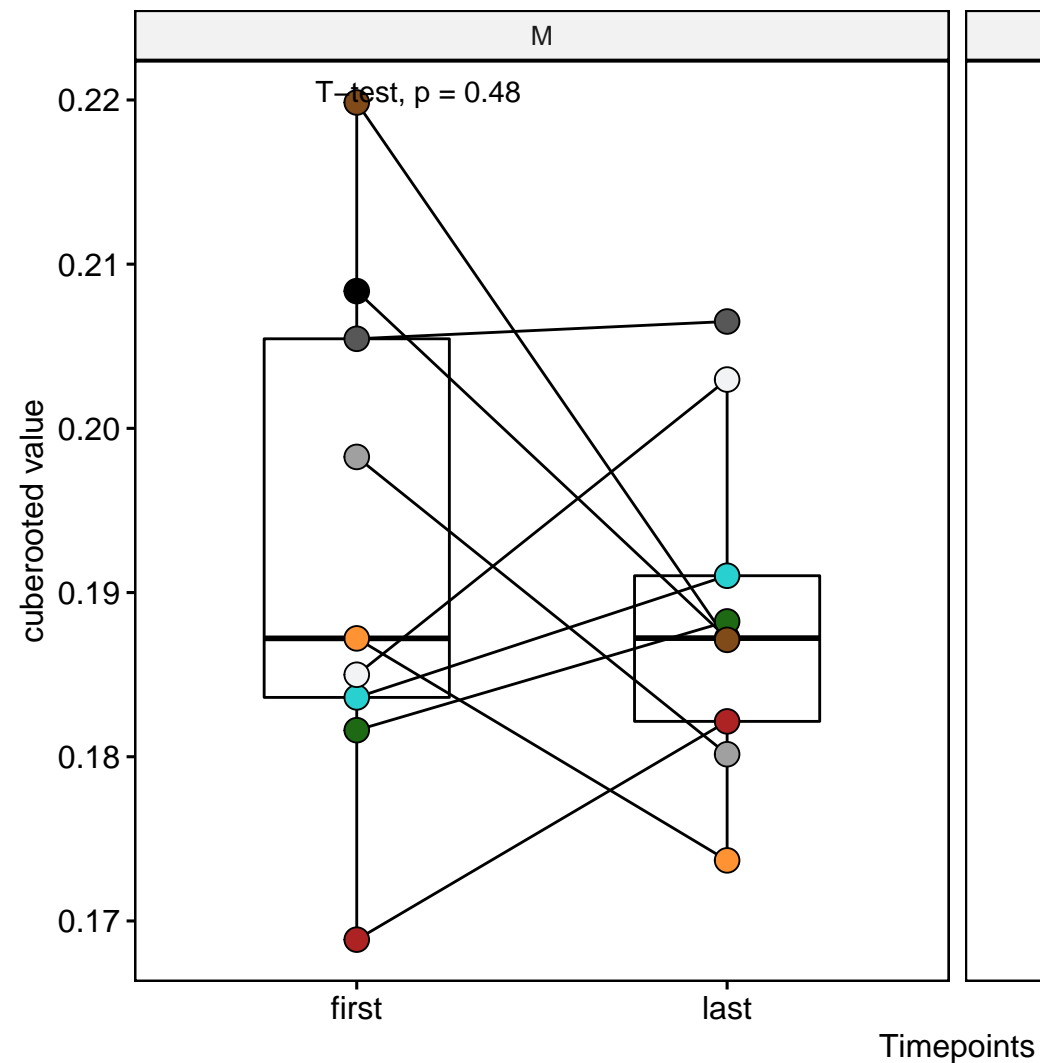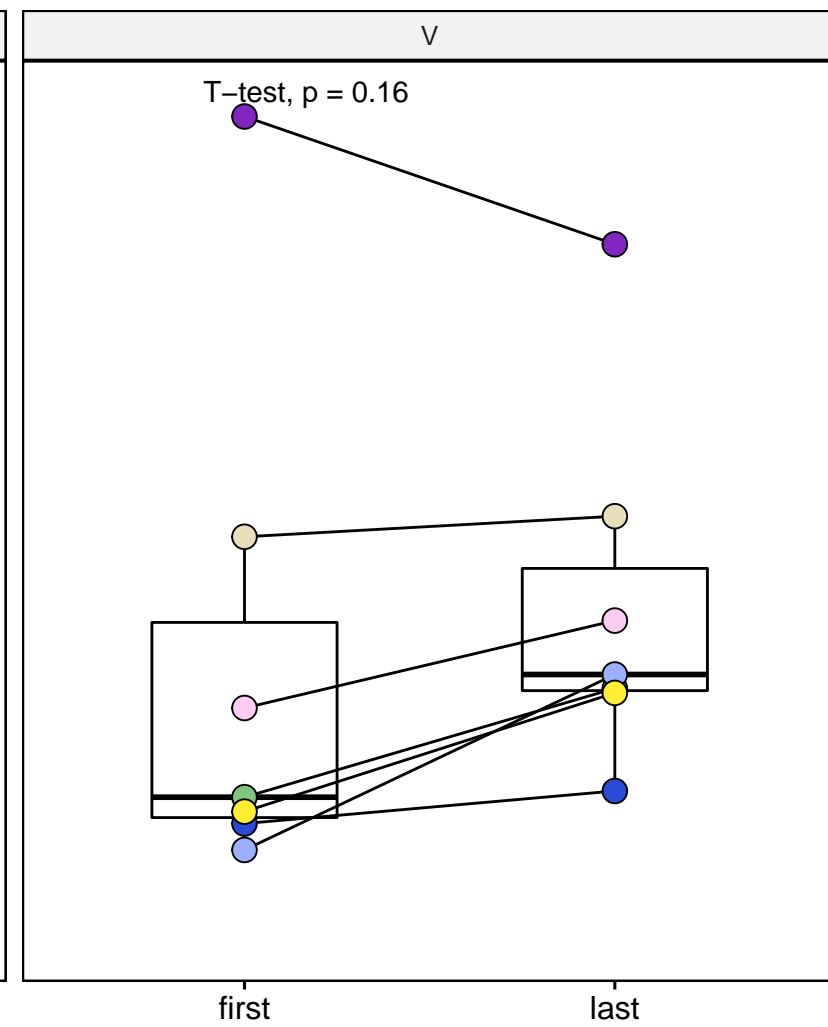

PatID

|              |               |              |              |
|--------------|---------------|--------------|--------------|
| 11_V68_8days | 18_V52_11days | 27_M71_4days | 40_V69_4days |
| 12_V73_7days | 21_V53_9days  | 28_V53_6days | 41_M70_6days |
| 13_M74_4days | 22_M65_3days  | 30_M49_5days | 44_M57_5days |
| 15_M71_7days | 25_M87_3days  | 32_V69_3days | 6d_M79_8days |

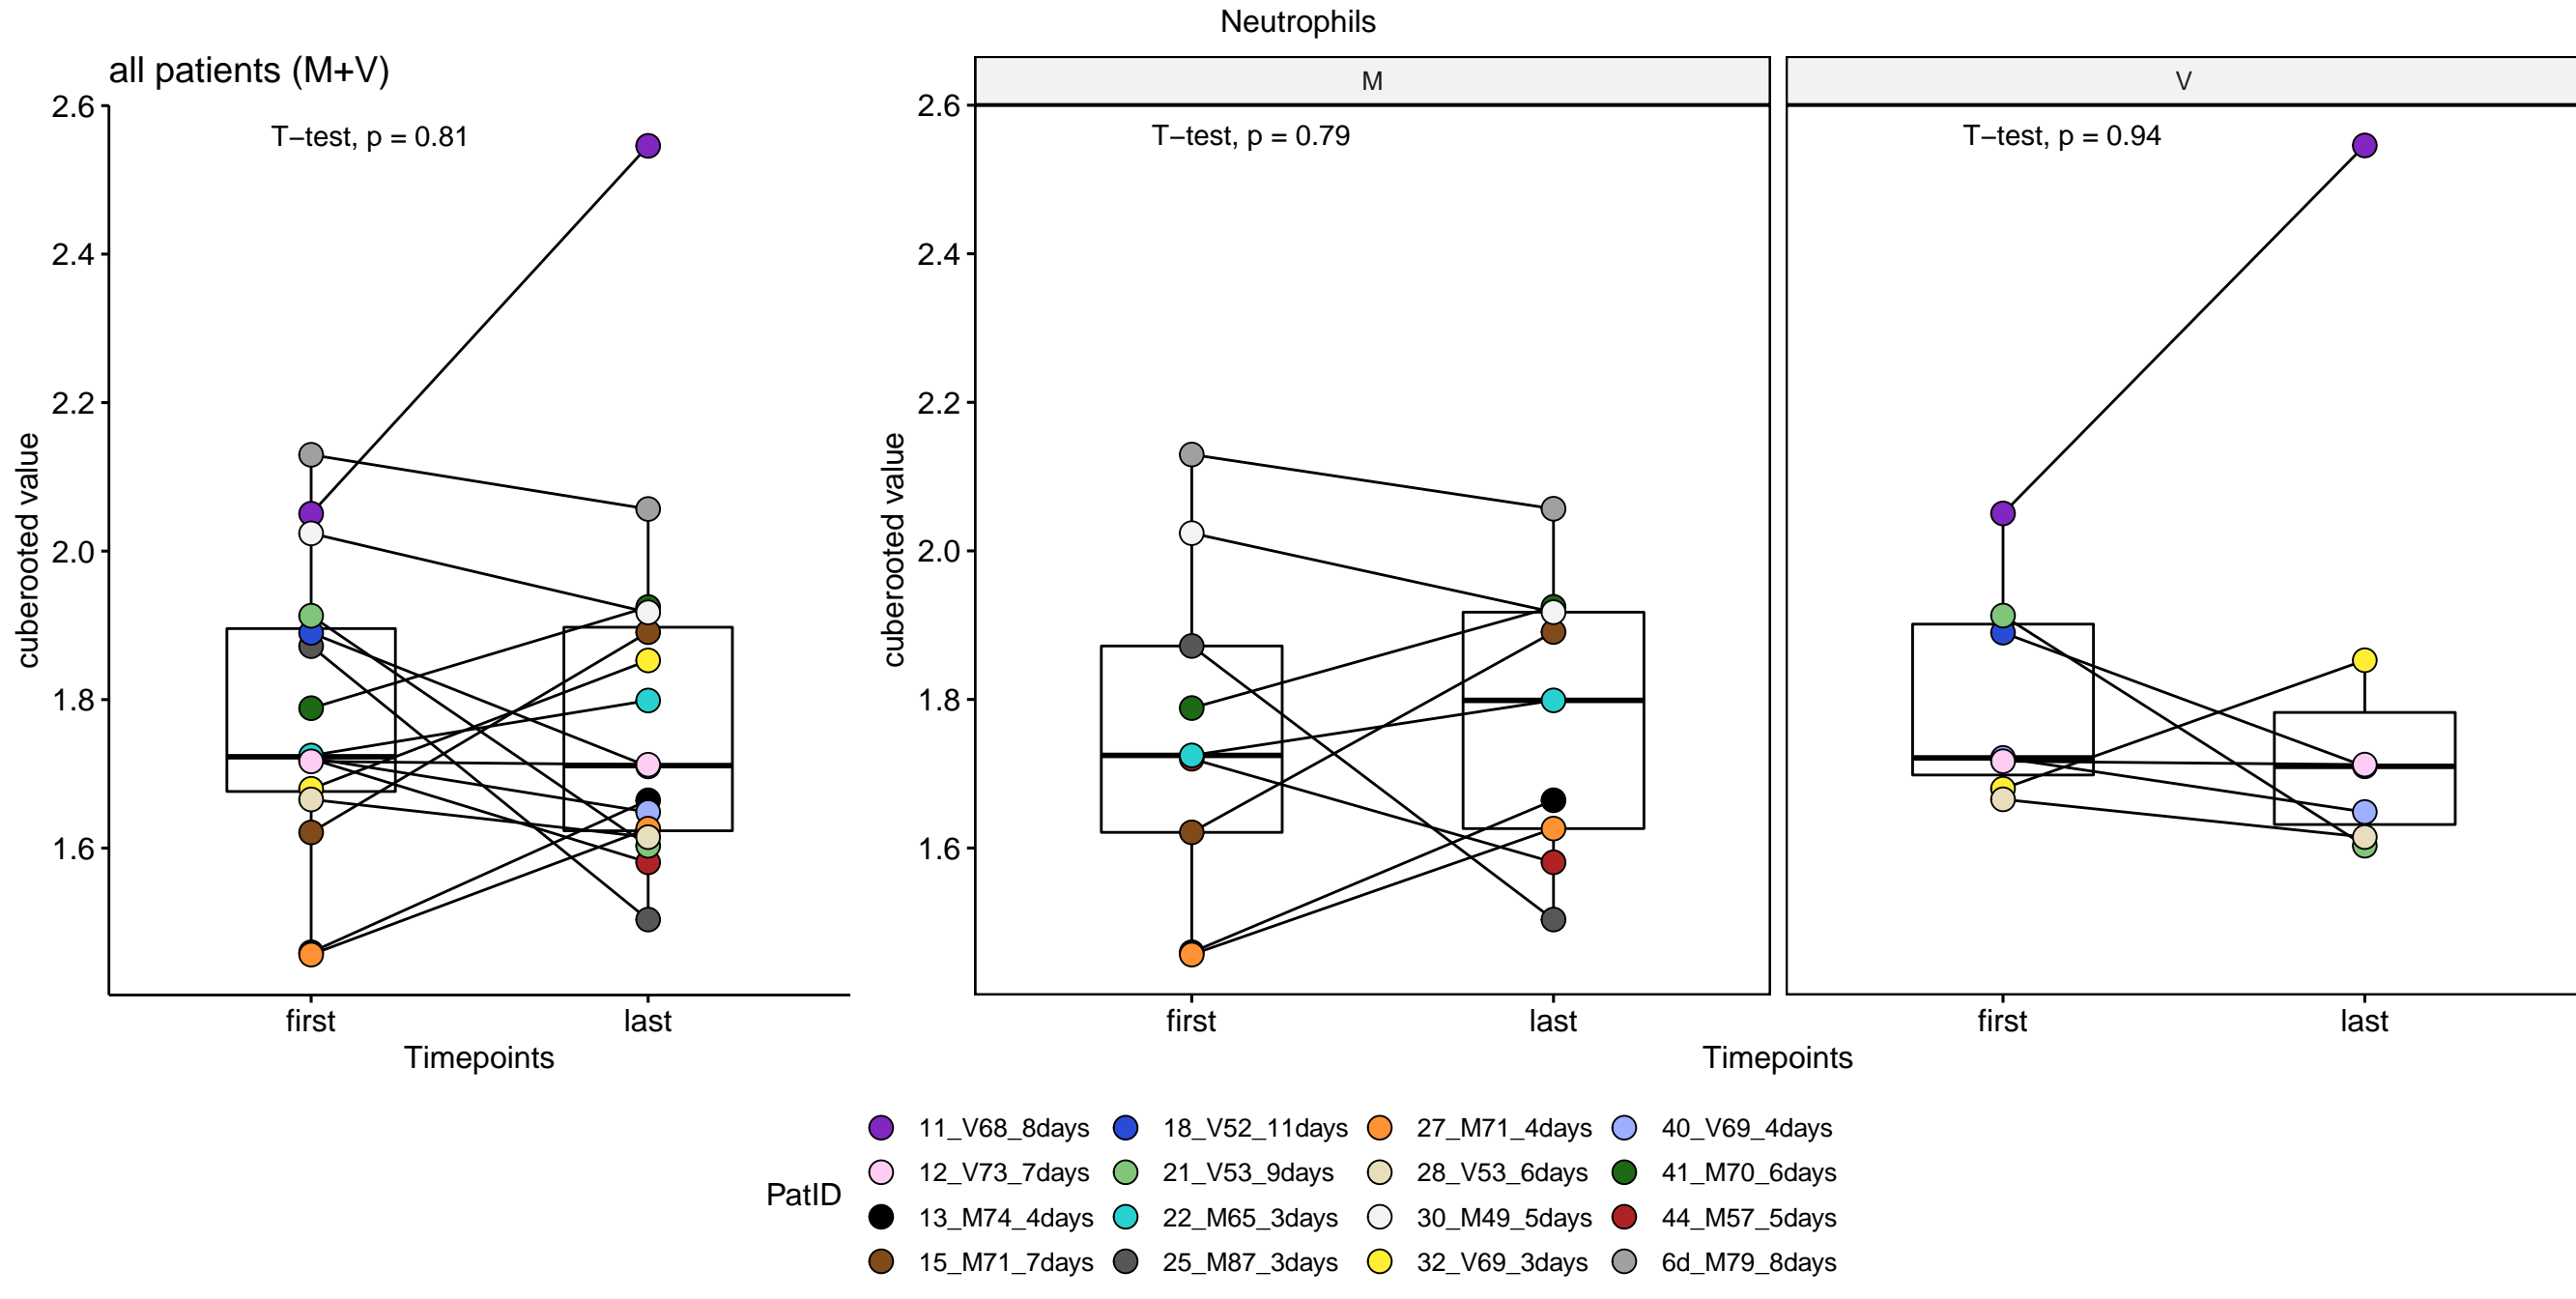

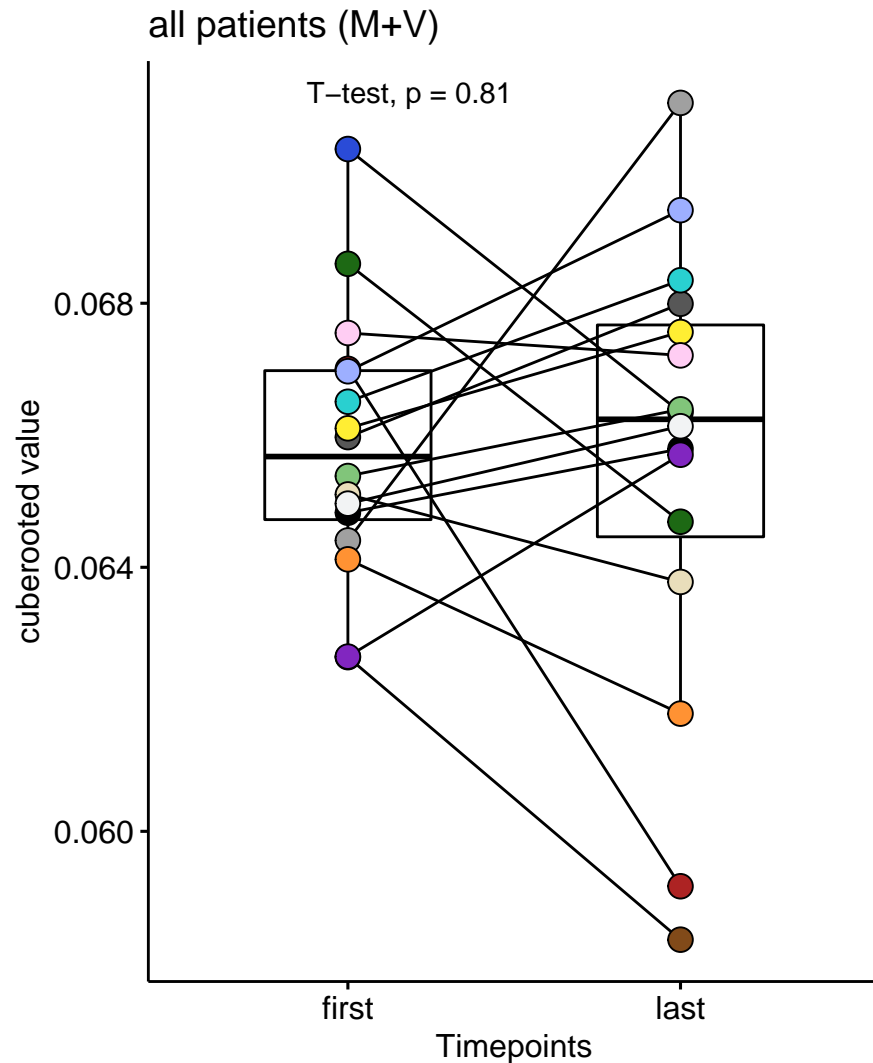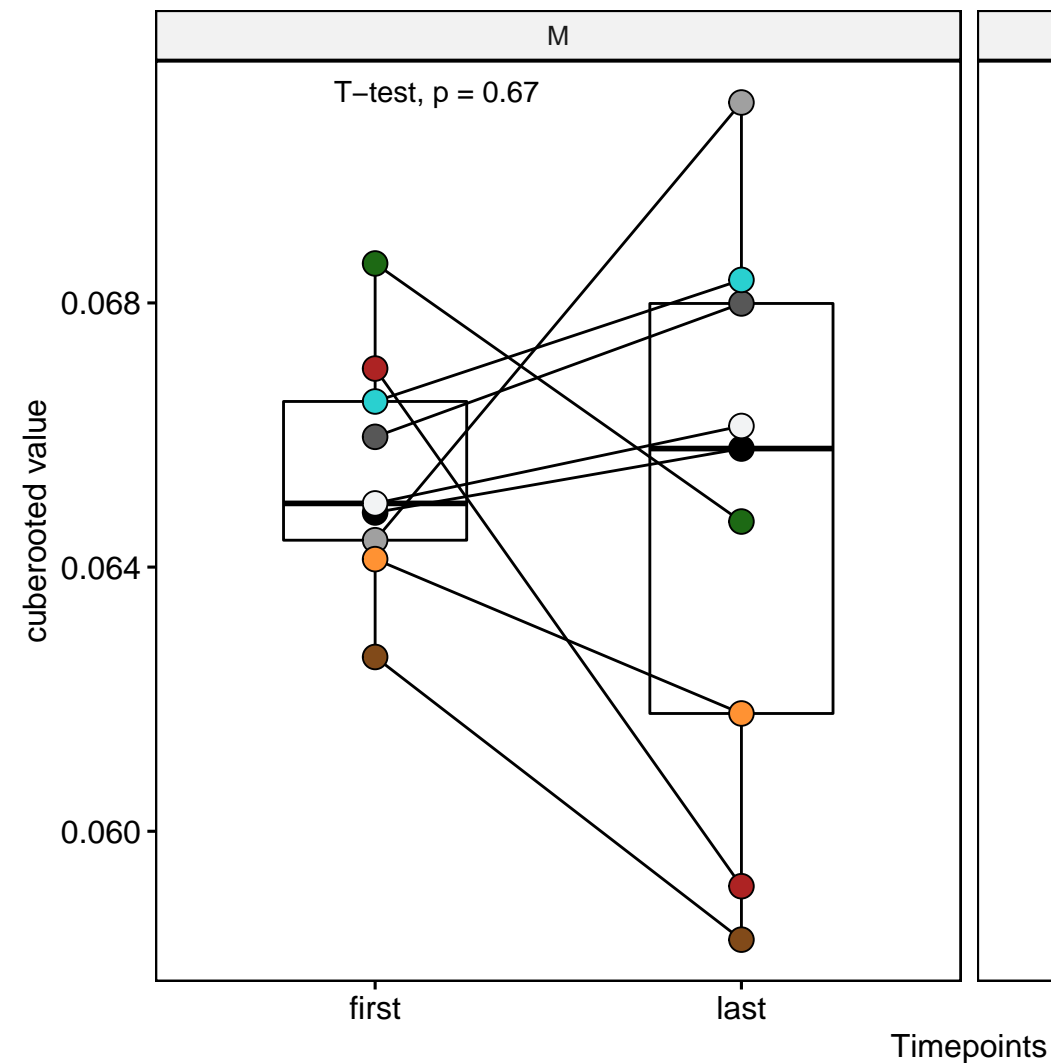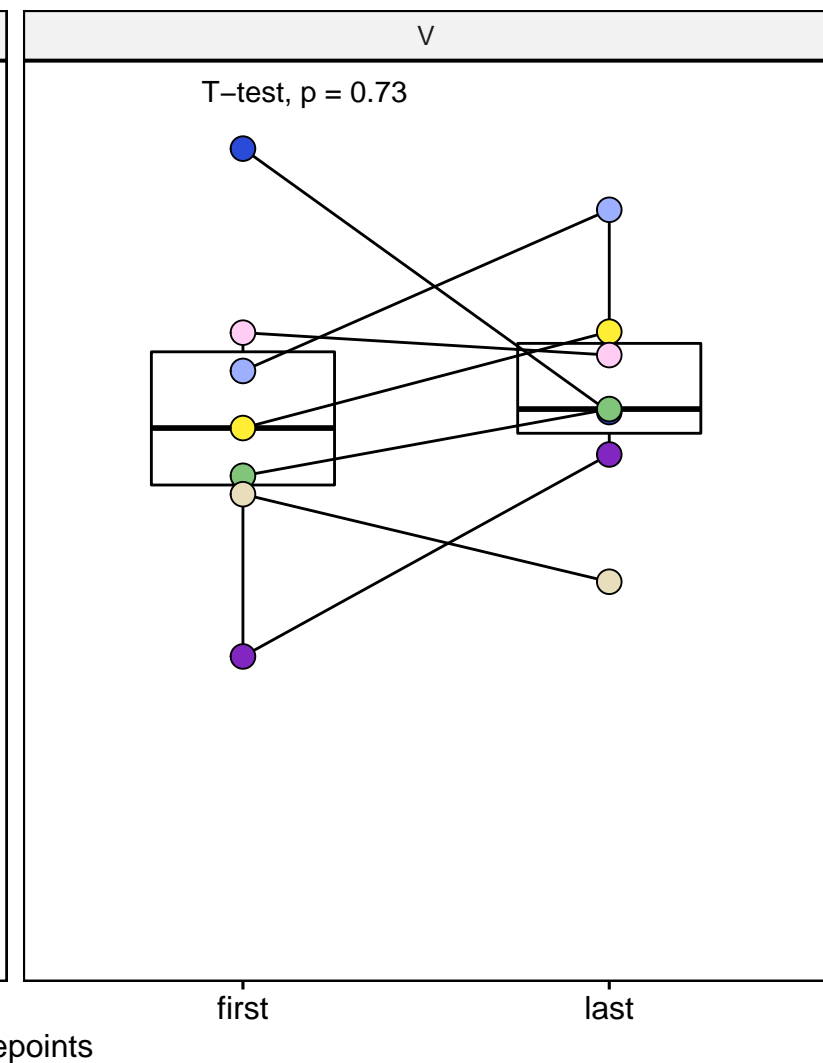

# Saccharopine\_amines\_wc

all patients (M+V)

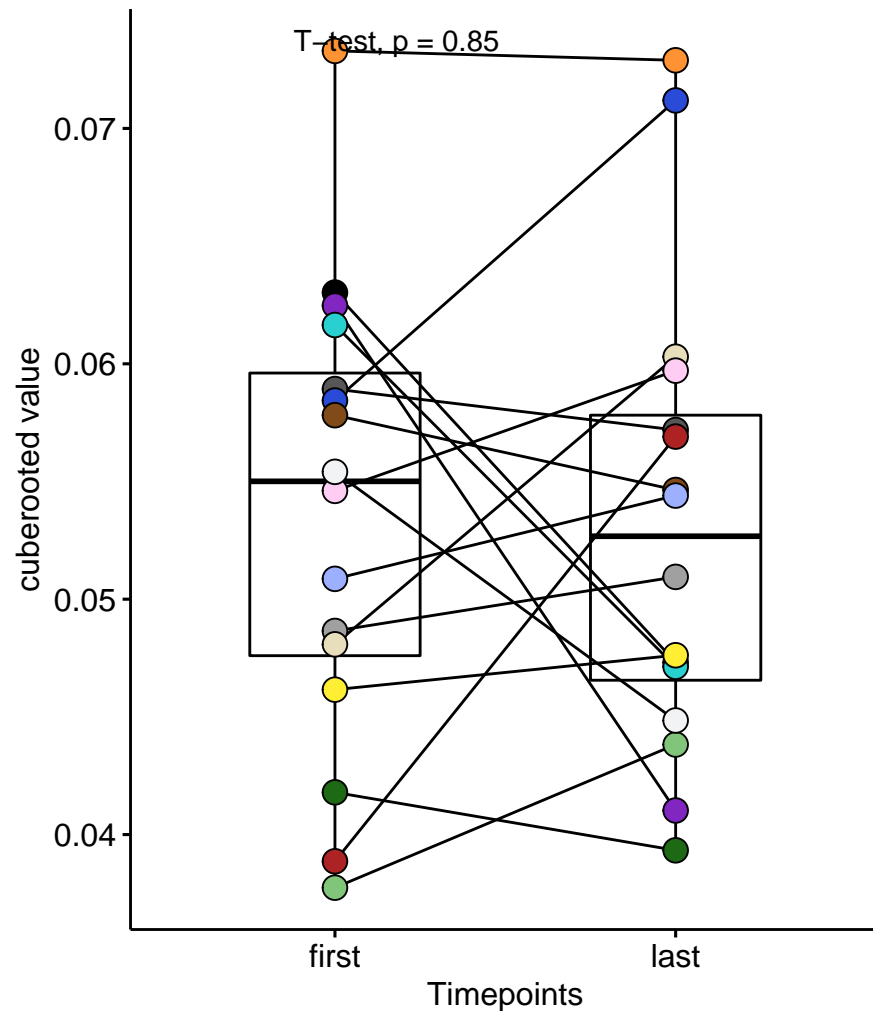

M

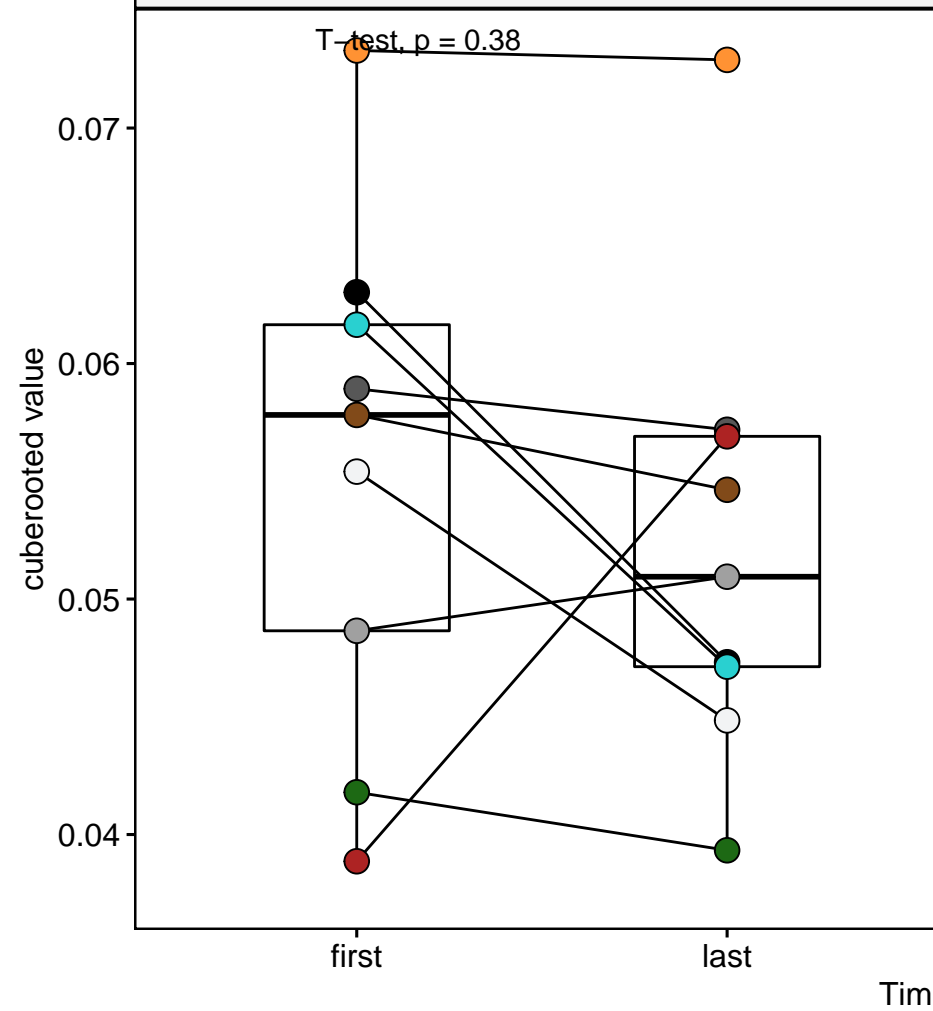

V

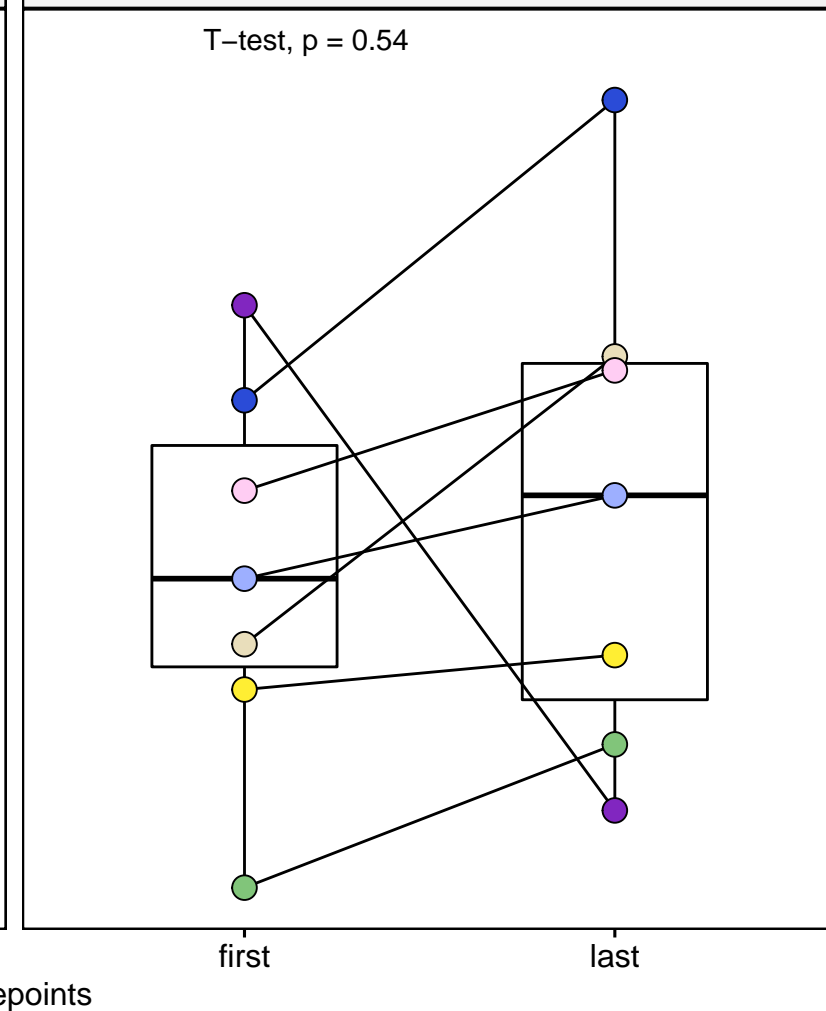

- PatID
- 11\_V68\_8days
  - 12\_V73\_7days
  - 13\_M74\_4days
  - 15\_M71\_7days
  - 18\_V52\_11days
  - 21\_V53\_9days
  - 22\_M65\_3days
  - 25\_M87\_3days
  - 27\_M71\_4days
  - 28\_V53\_6days
  - 30\_M49\_5days
  - 32\_V69\_3days
  - 40\_V69\_4days
  - 41\_M70\_6days
  - 44\_M57\_5days
  - 6d\_M79\_8days



# L.Histidine\_amines

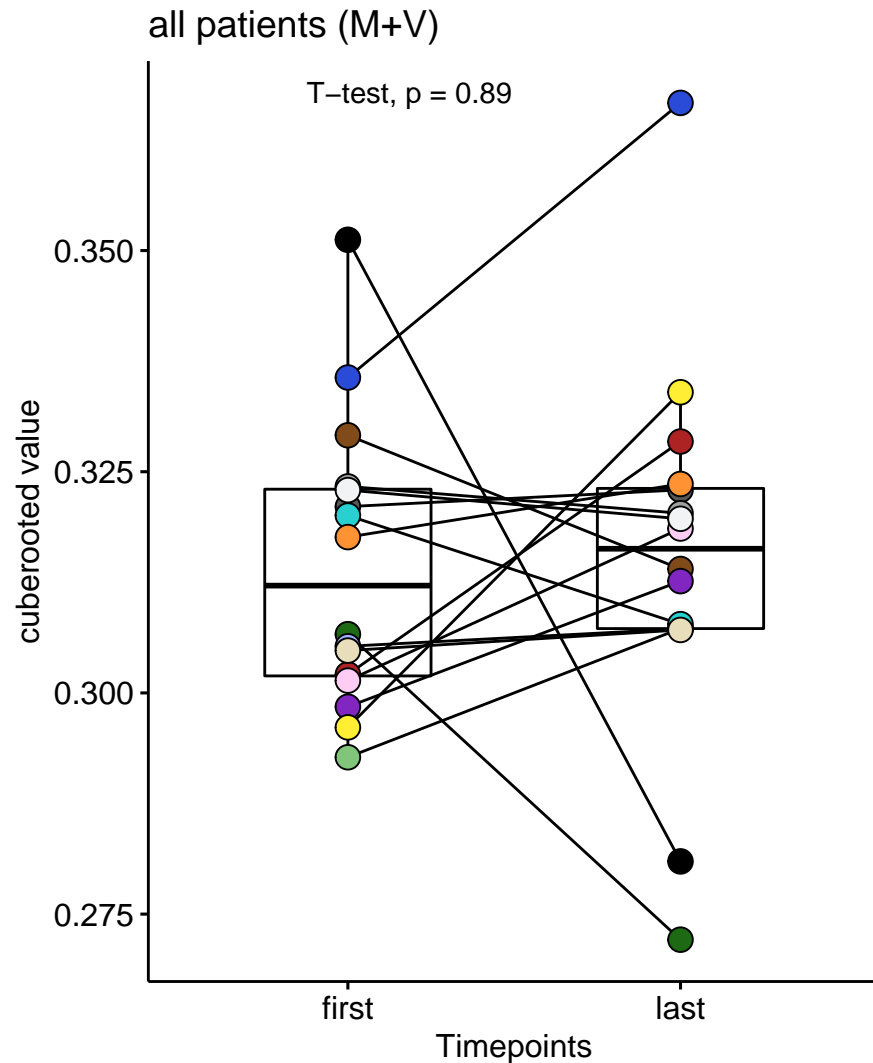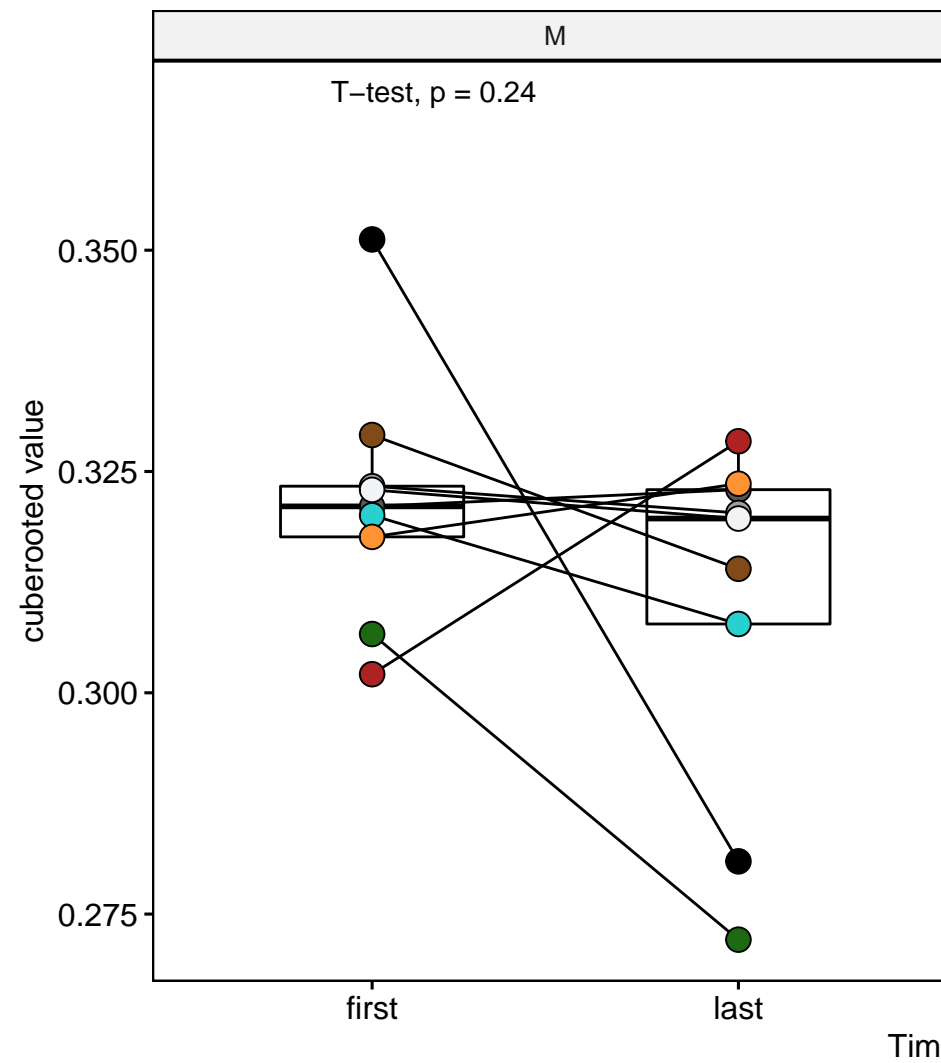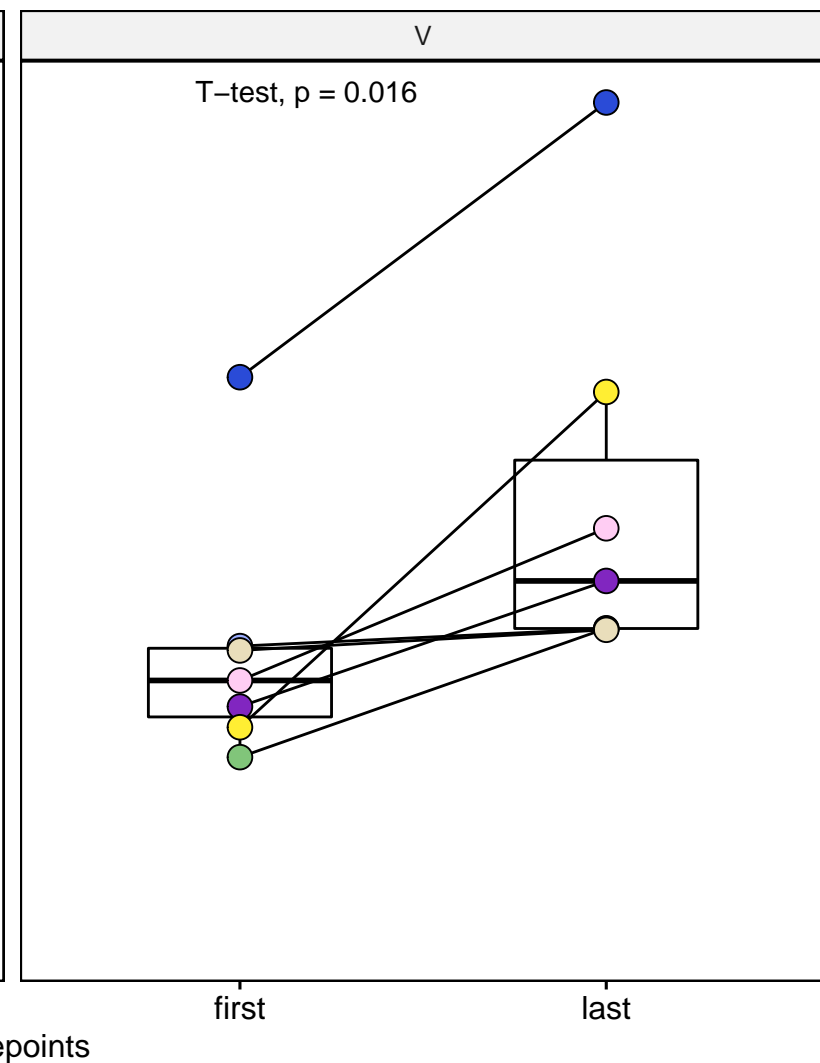

Ratio4\_8

all patients (M+V)

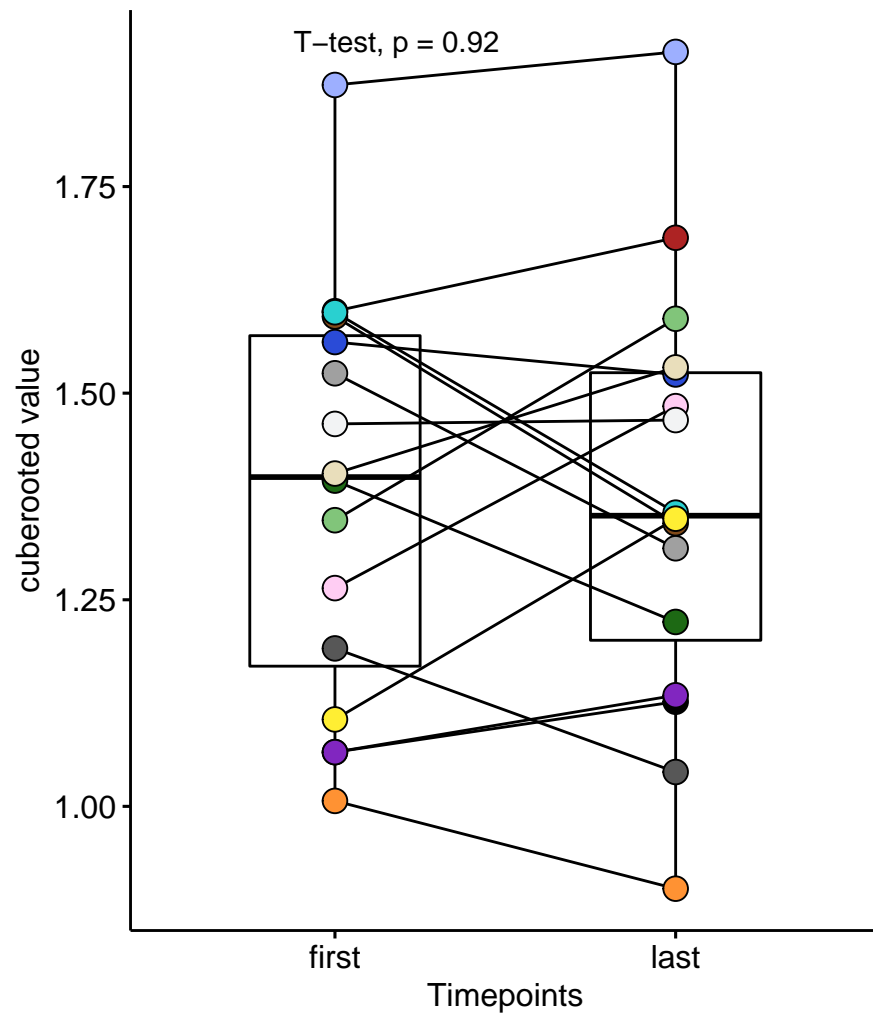

M

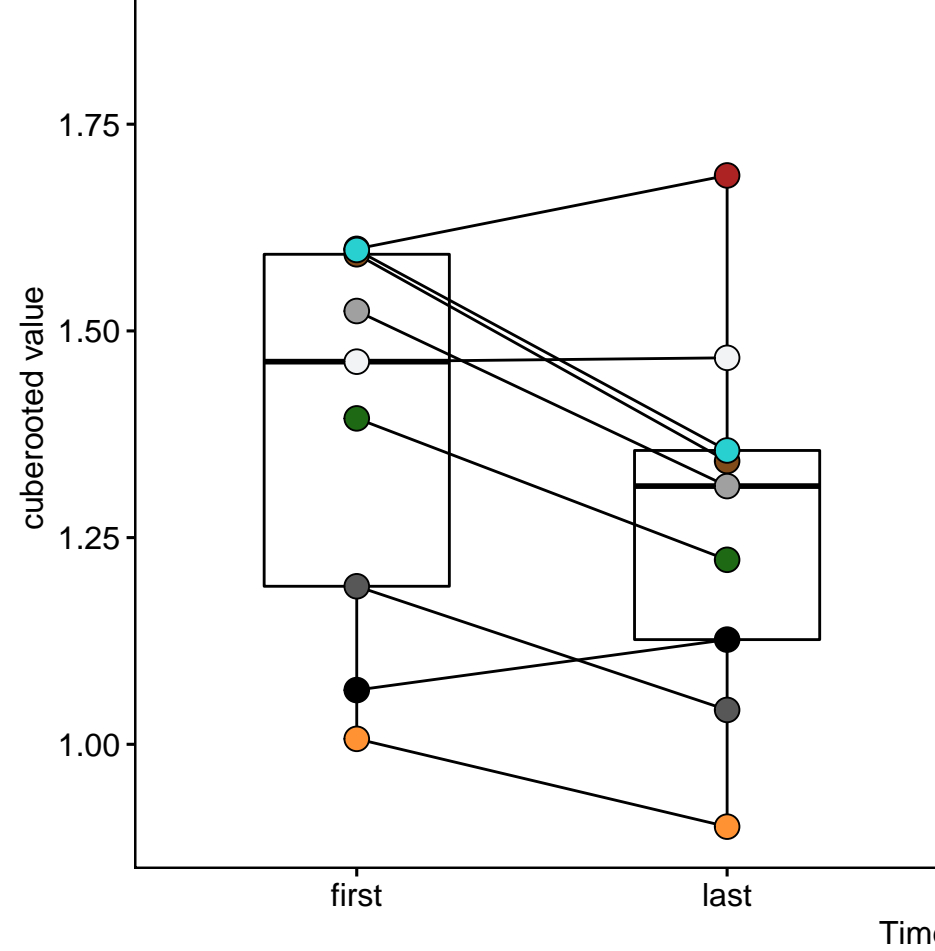

V

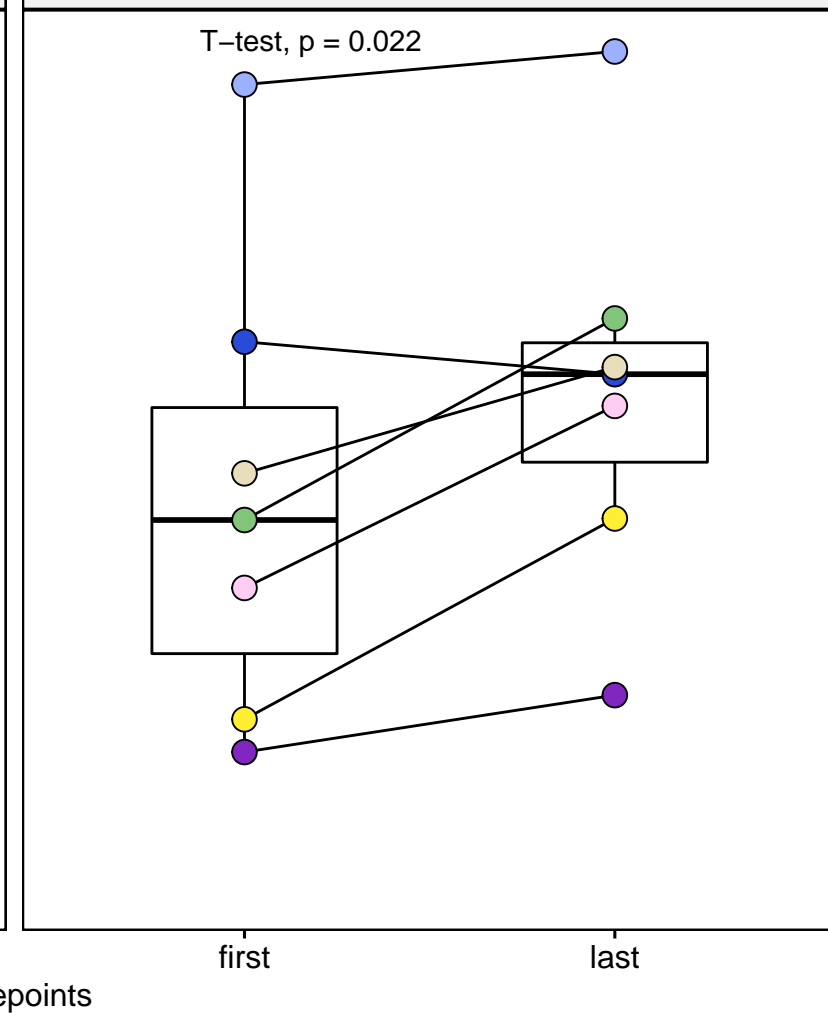

# Anserine\_amines\_wc

all patients (M+V)

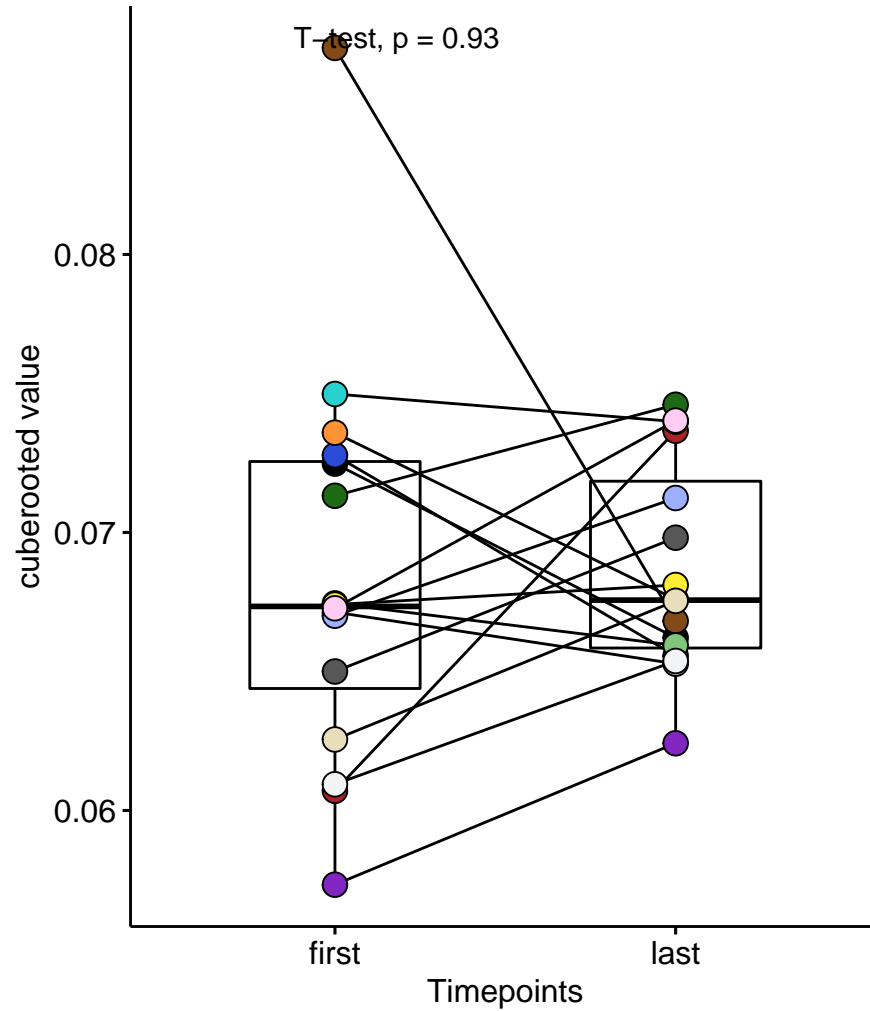

M

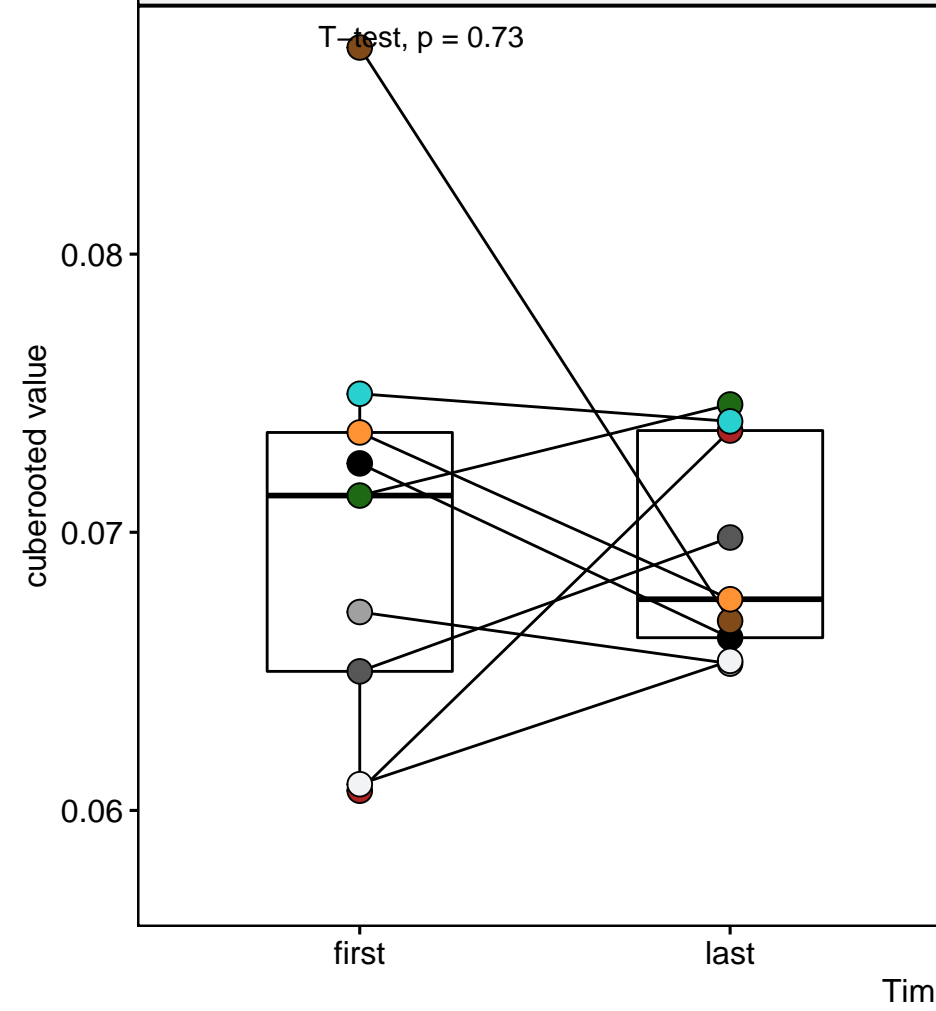

V

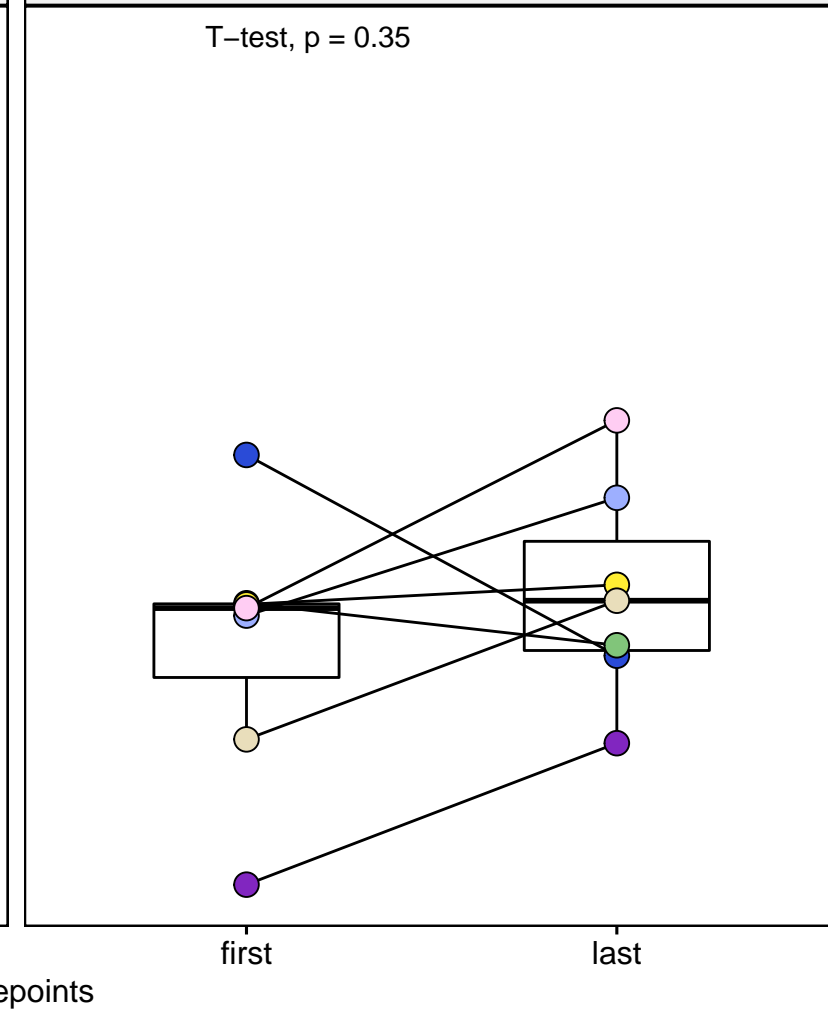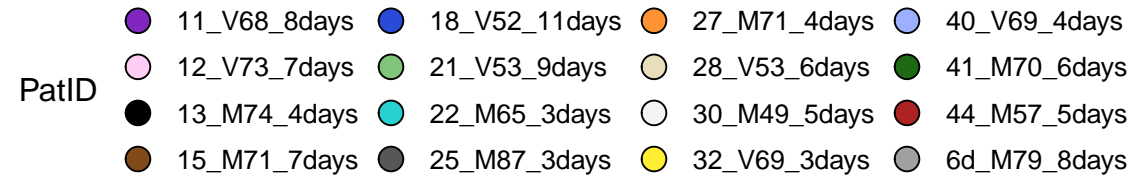

# Glutathione\_amines

all patients (M+V)

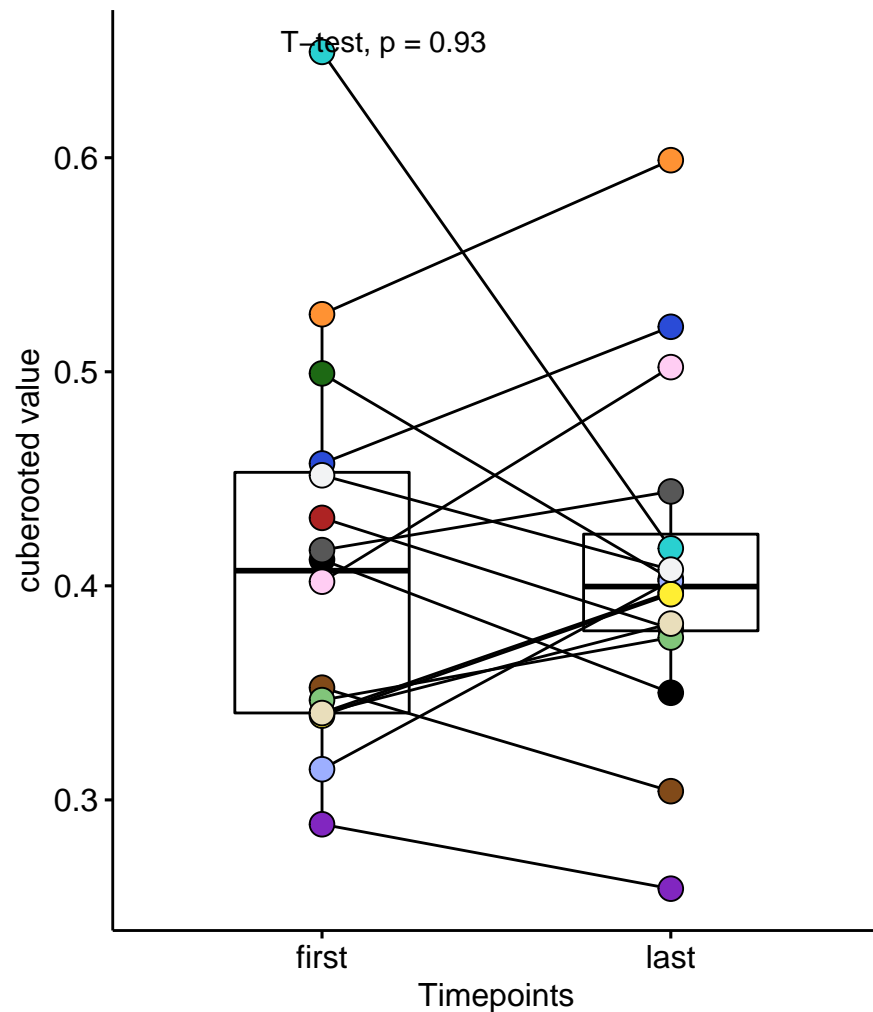

PatID

|              |               |              |              |
|--------------|---------------|--------------|--------------|
| 11_V68_8days | 18_V52_11days | 27_M71_4days | 40_V69_4days |
| 12_V73_7days | 21_V53_9days  | 28_V53_6days | 41_M70_6days |
| 13_M74_4days | 22_M65_3days  | 30_M49_5days | 44_M57_5days |
| 15_M71_7days | 25_M87_3days  | 32_V69_3days | 6d_M79_8days |

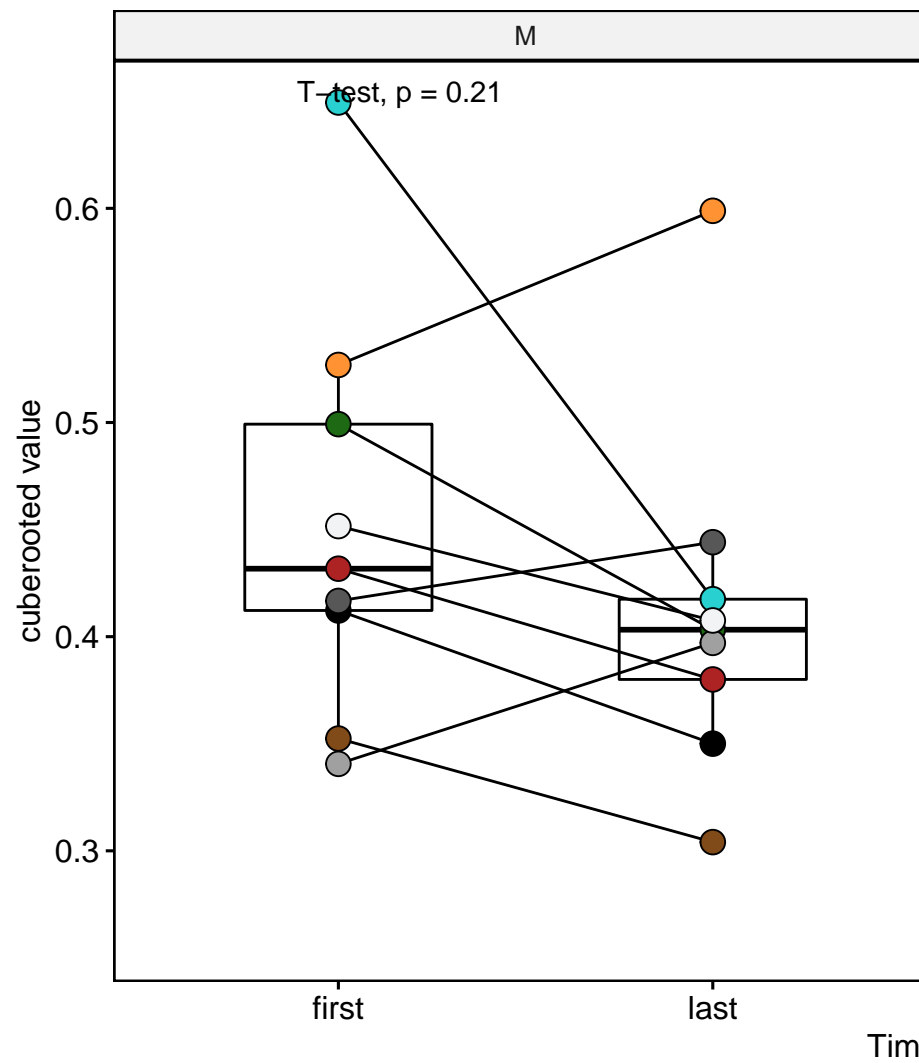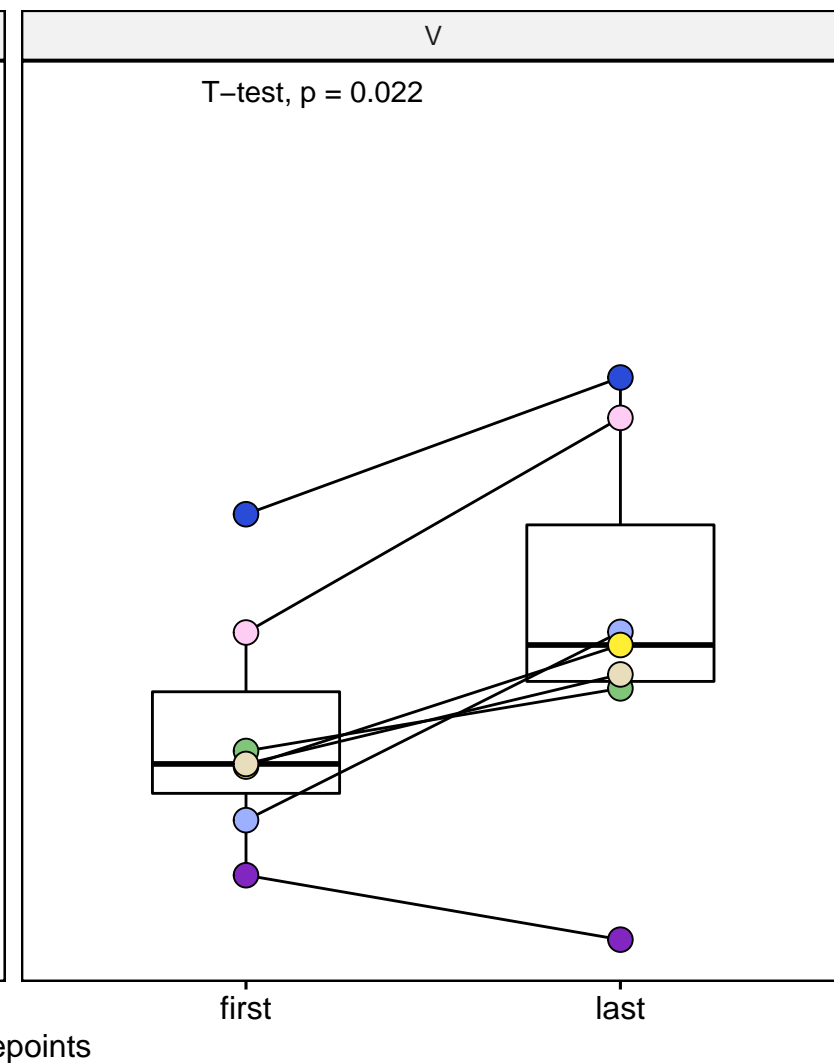

# Gamma.Glutamylglutamine\_amines

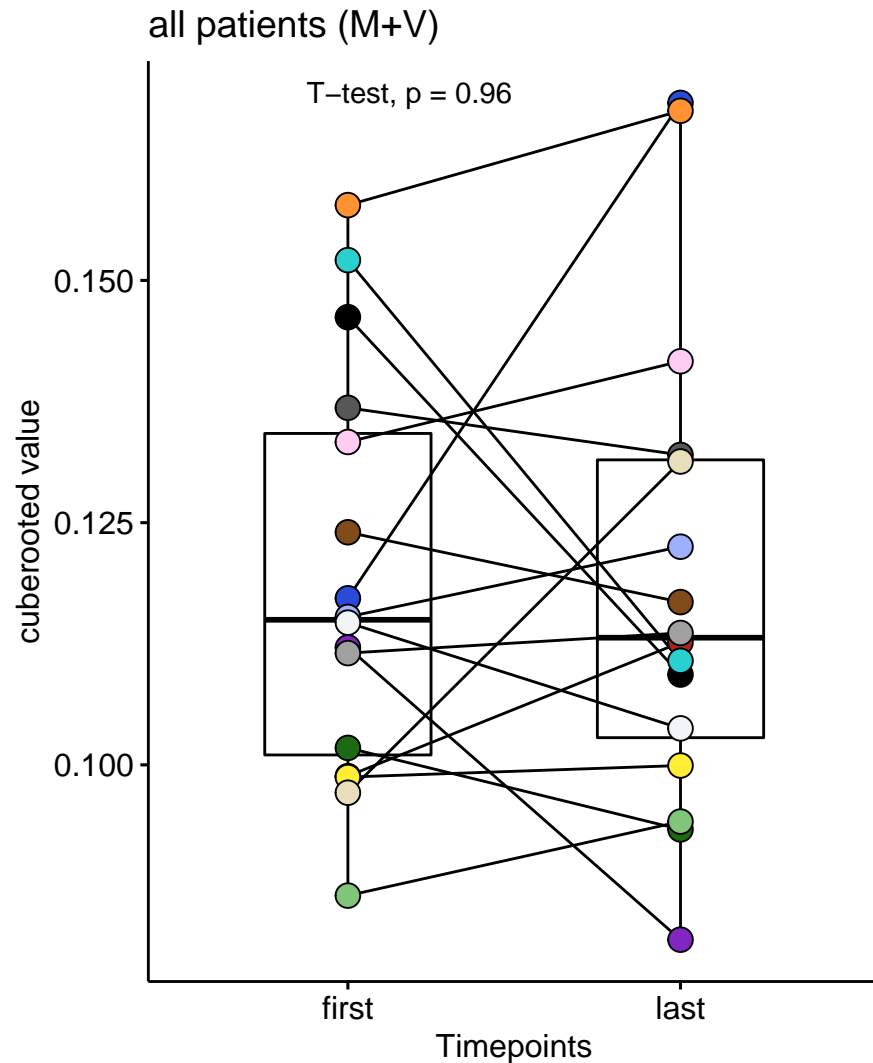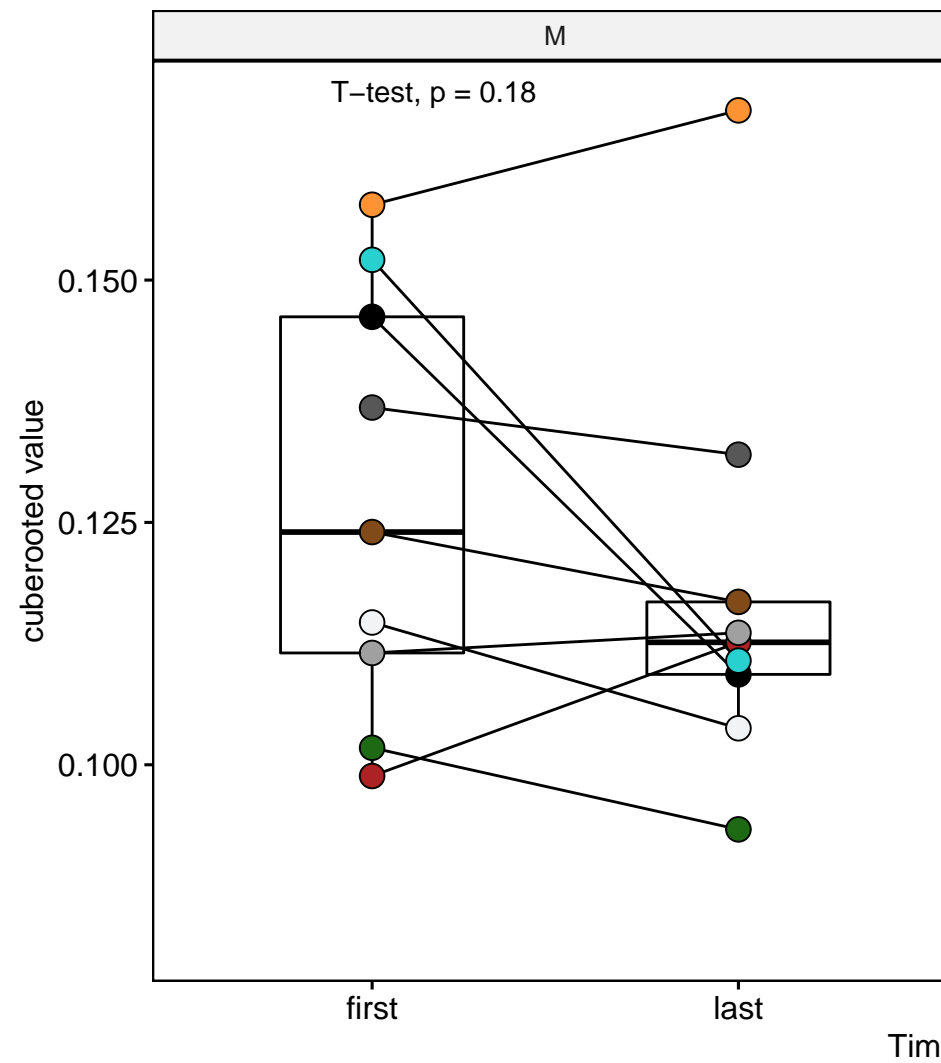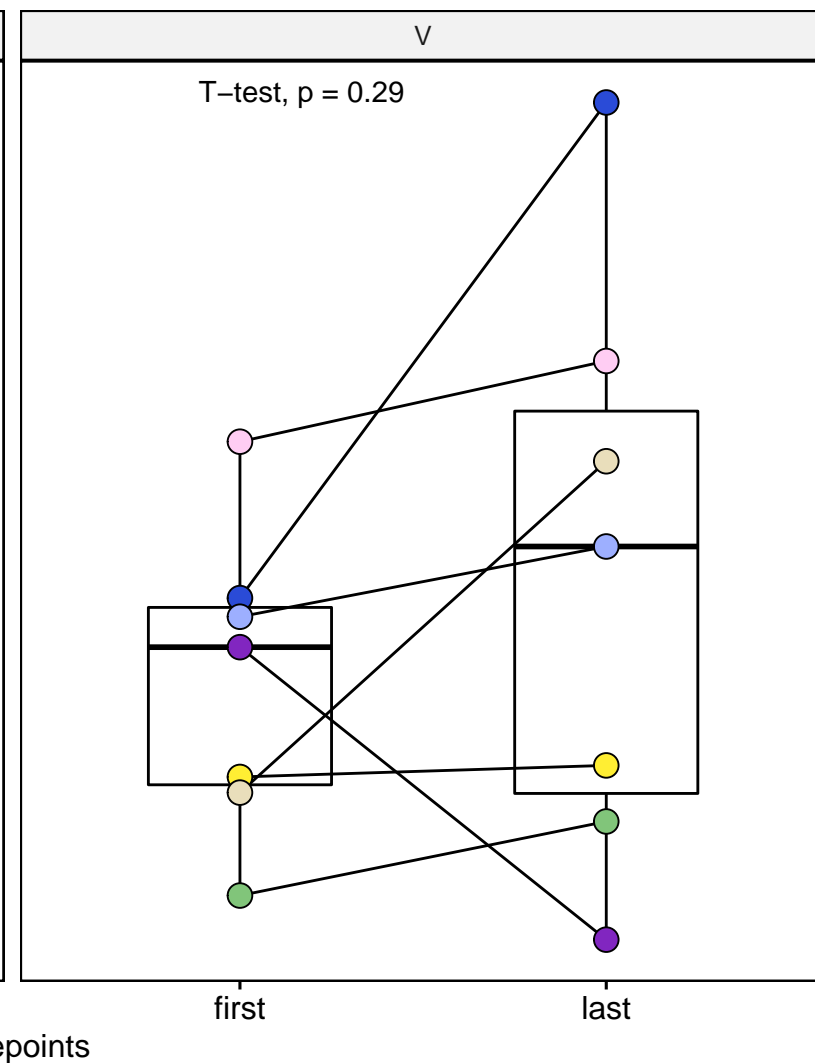

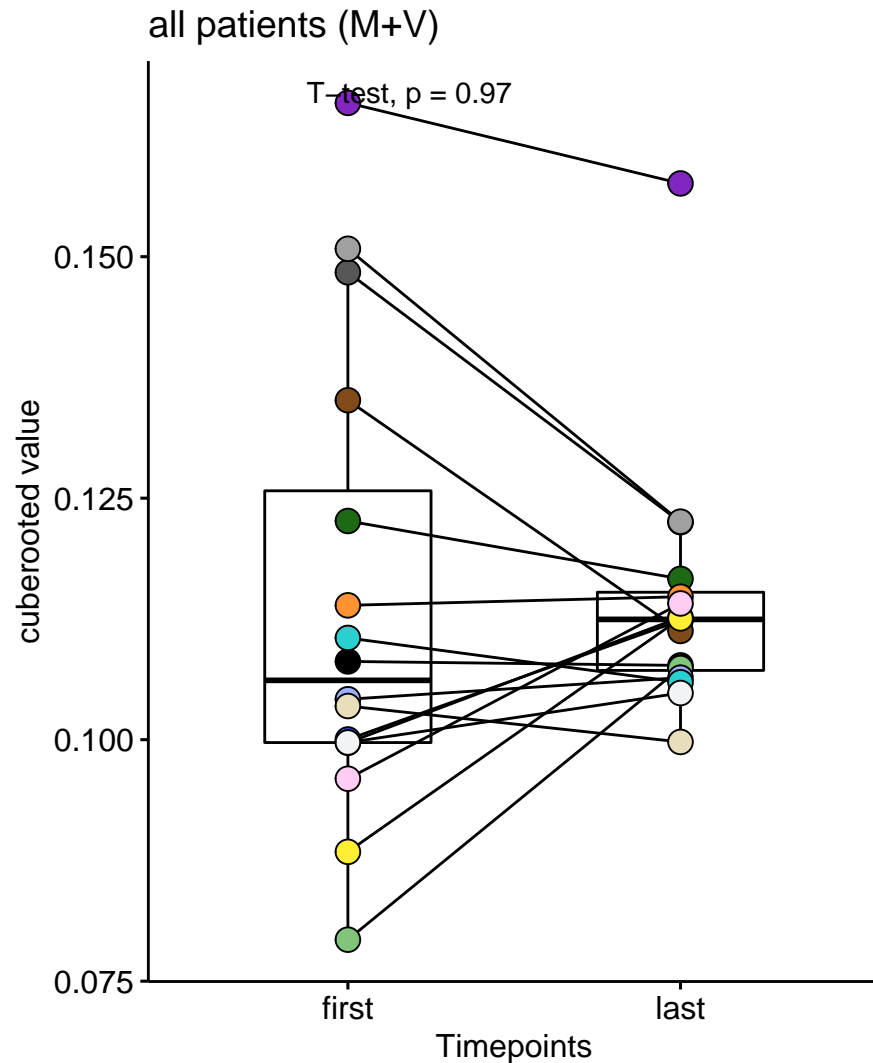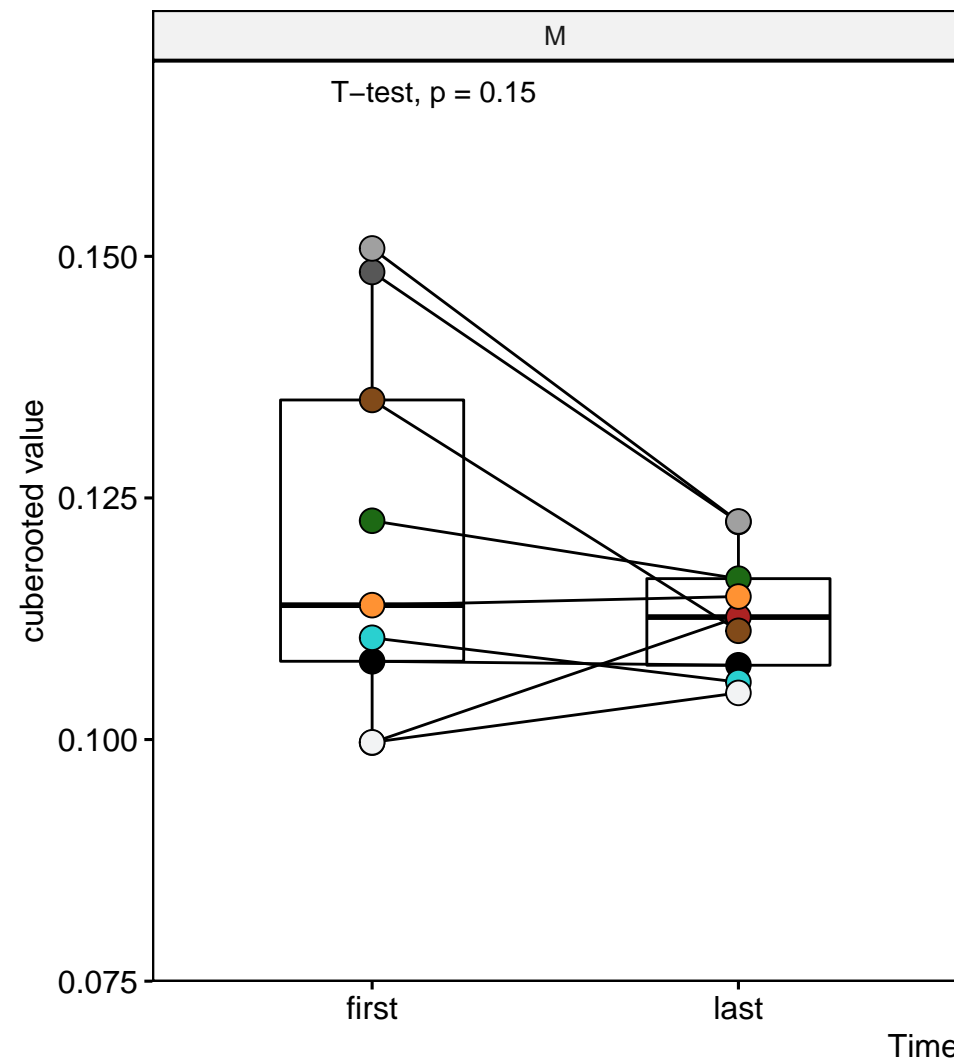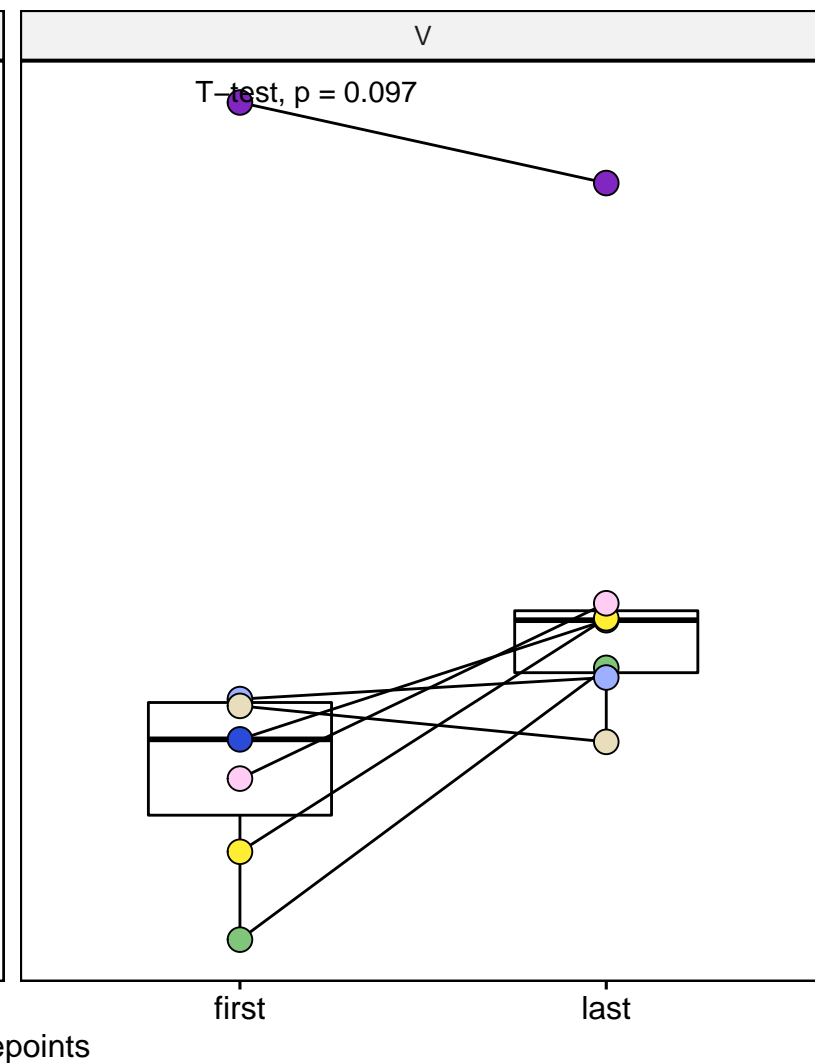

all patients (M+V)

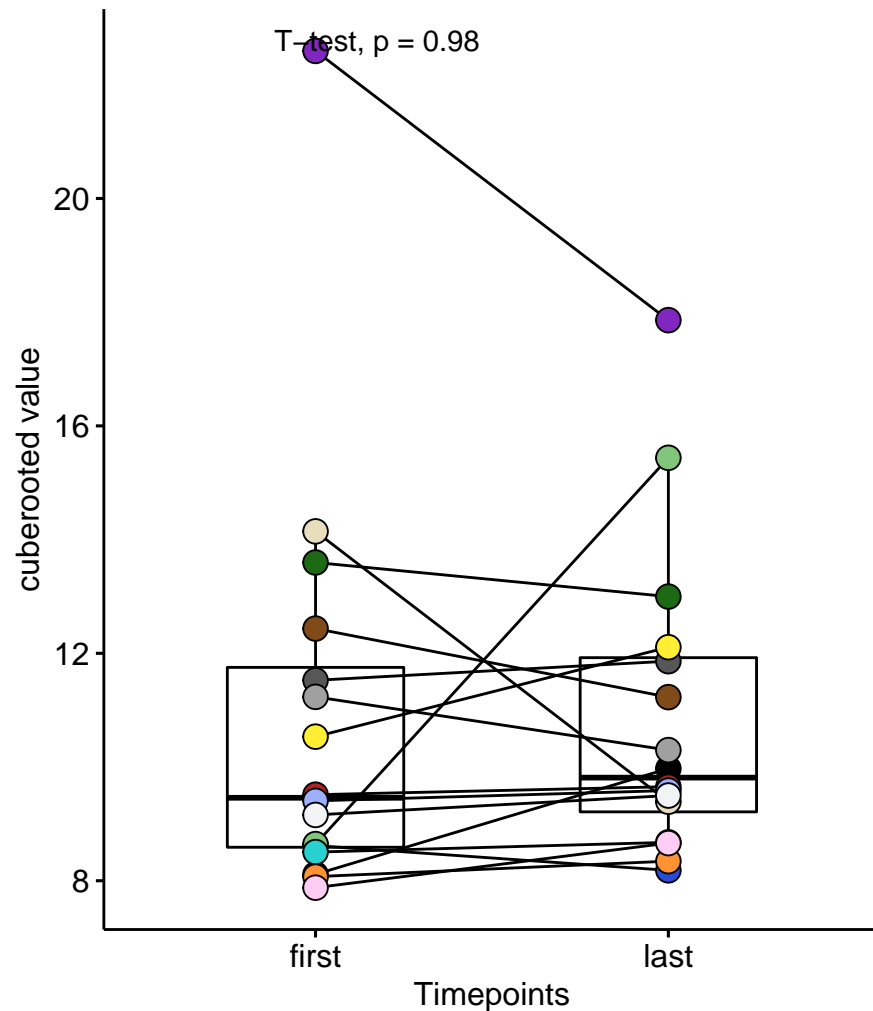

sIL2R

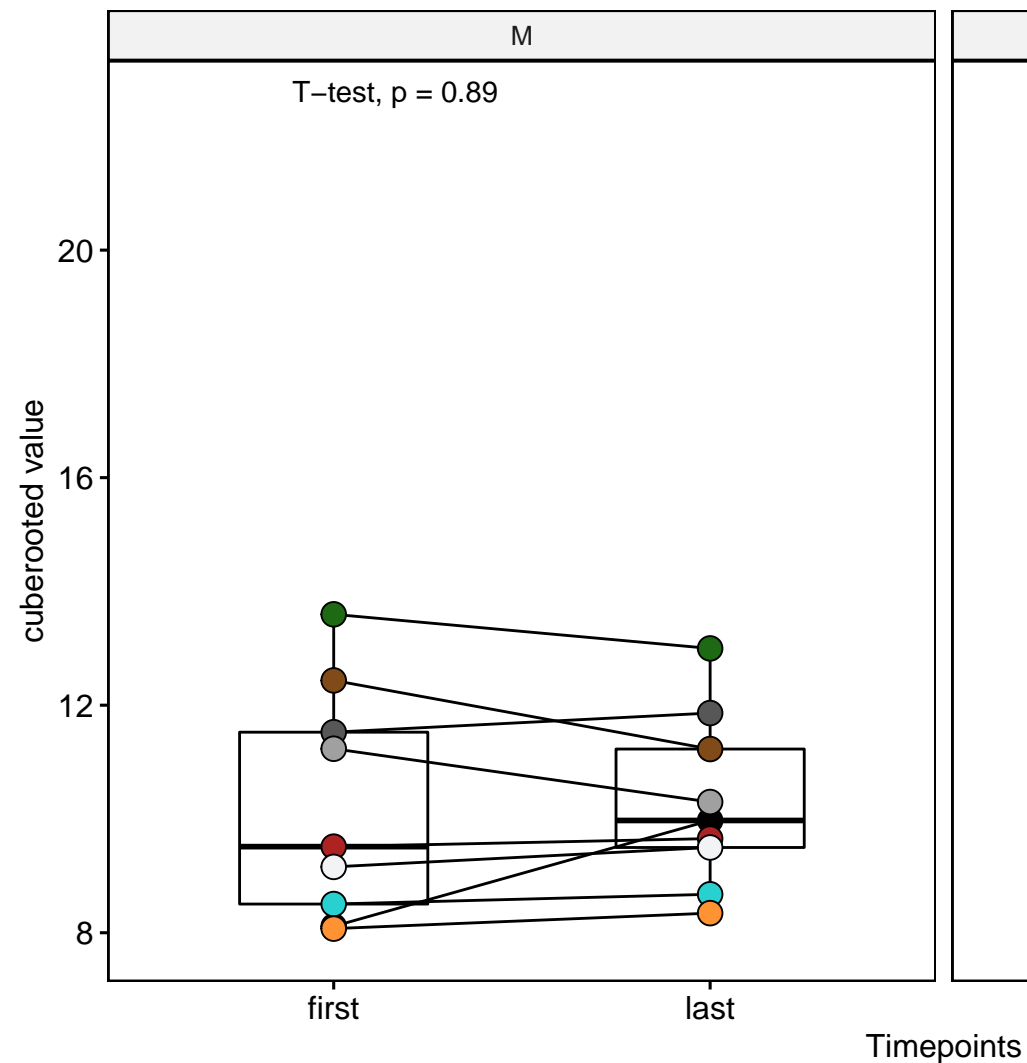

V

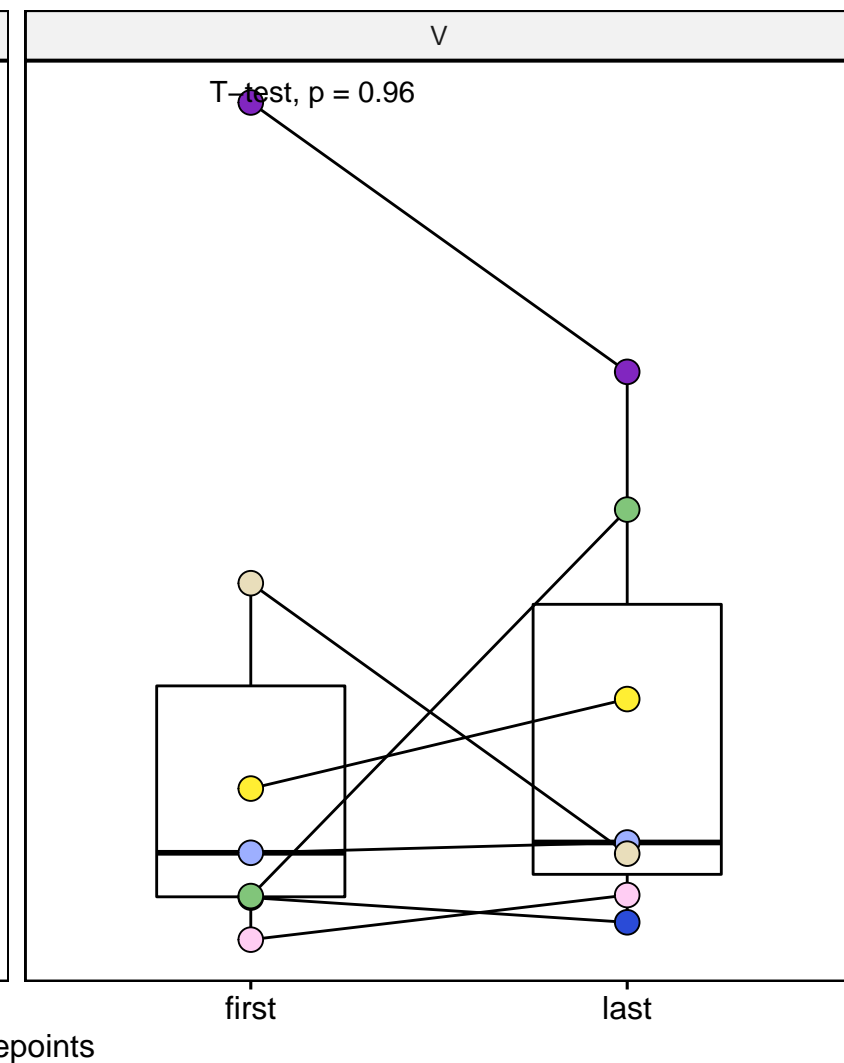

# SDMA\_amines\_wc

all patients (M+V)

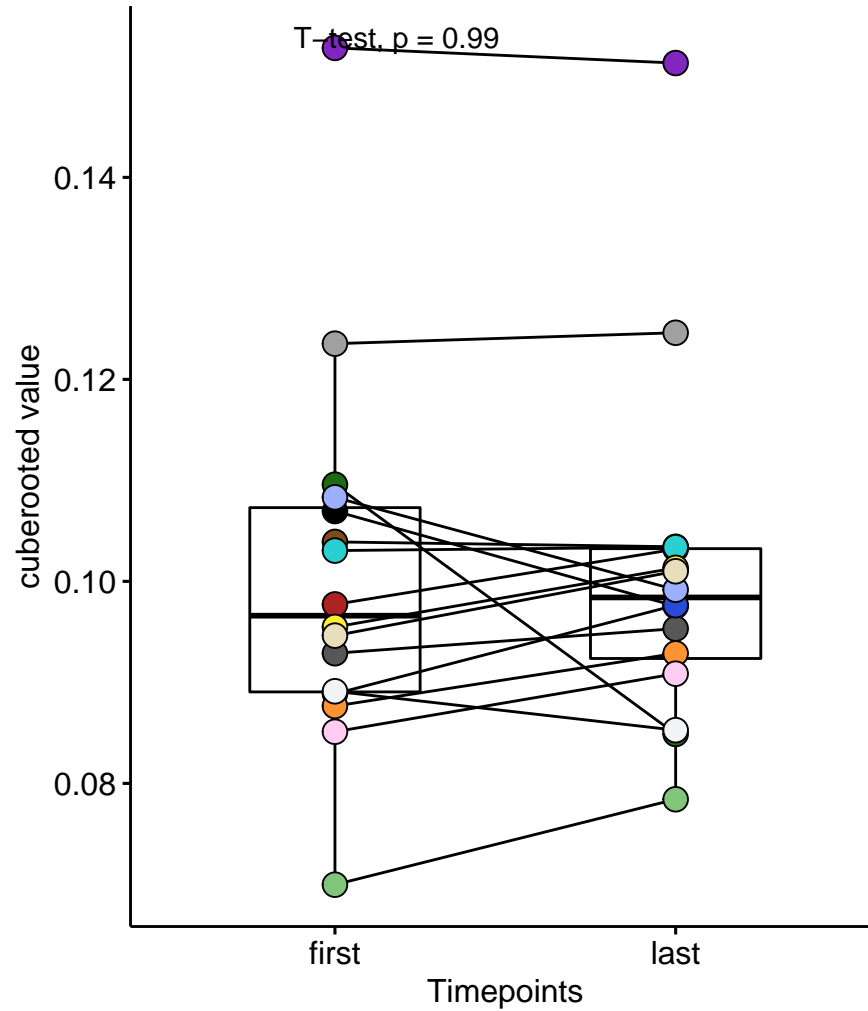

- PatID
- 11\_V68\_8days
  - 12\_V73\_7days
  - 13\_M74\_4days
  - 15\_M71\_7days
  - 18\_V52\_11days
  - 21\_V53\_9days
  - 22\_M65\_3days
  - 25\_M87\_3days
  - 27\_M71\_4days
  - 28\_V53\_6days
  - 30\_M49\_5days
  - 32\_V69\_3days
  - 40\_V69\_4days
  - 41\_M70\_6days
  - 44\_M57\_5days
  - 6d\_M79\_8days

M

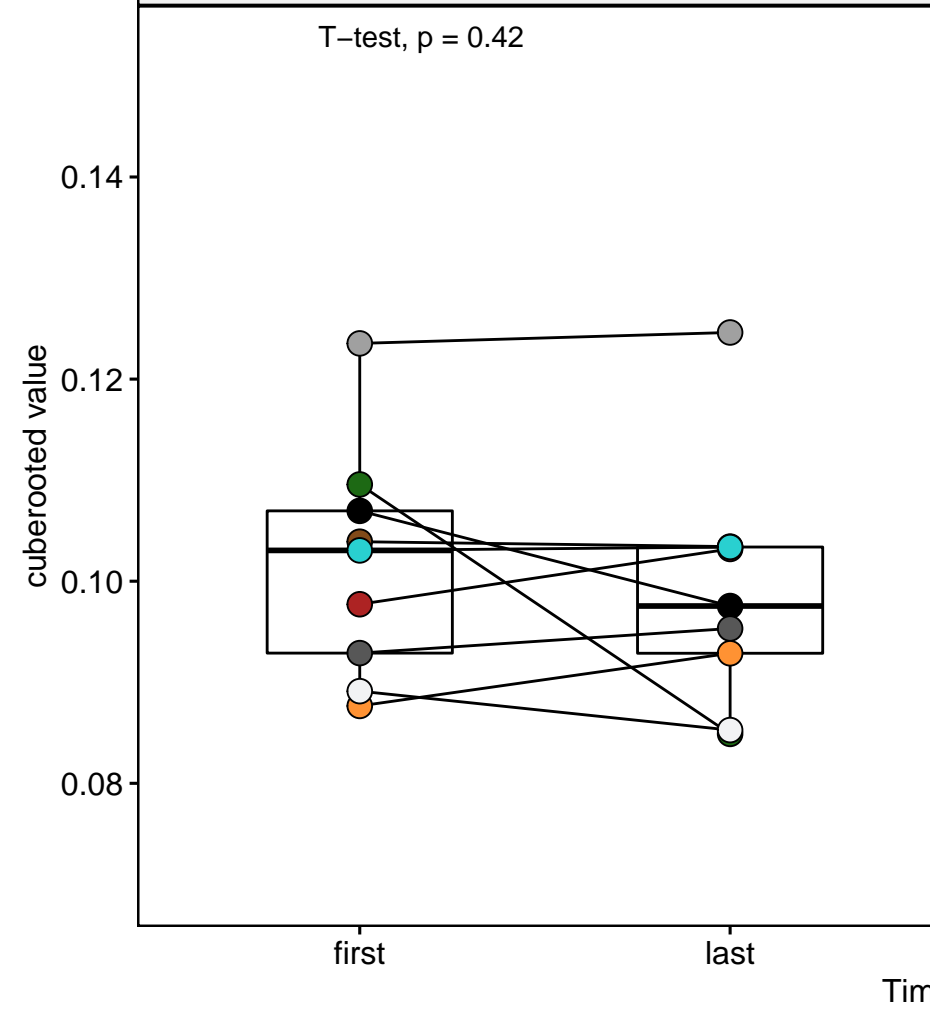

V

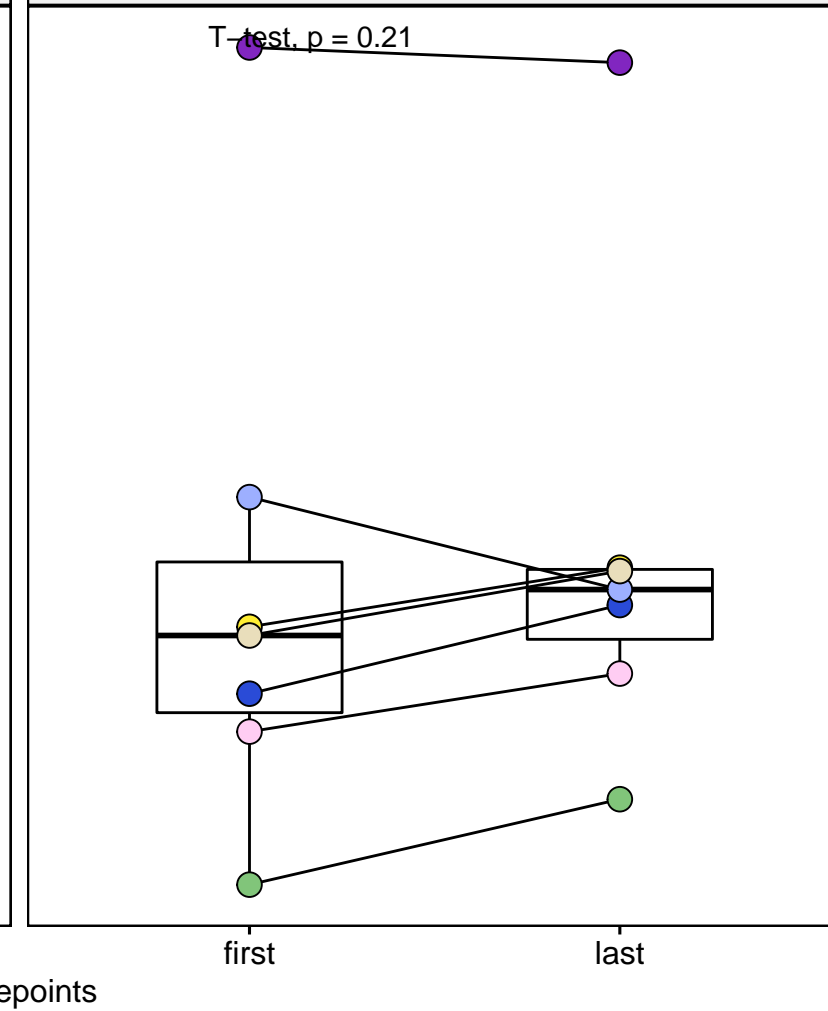



# L.Arginine\_amines

all patients (M+V)

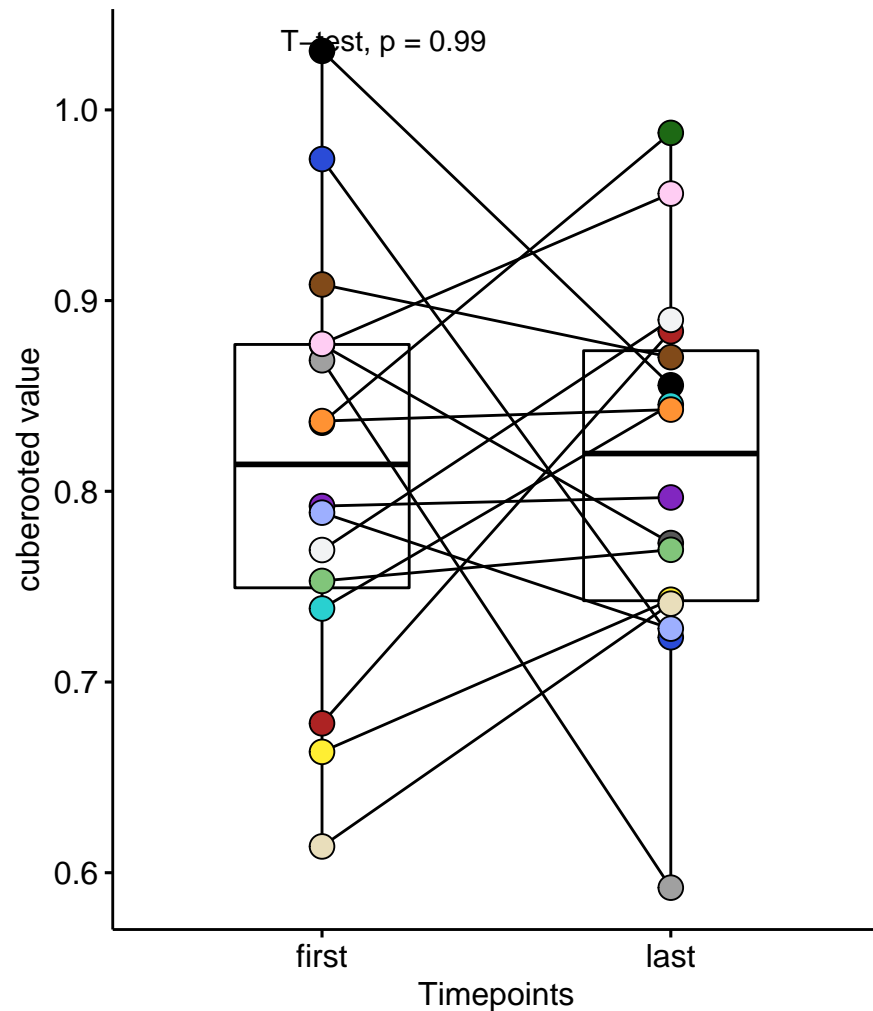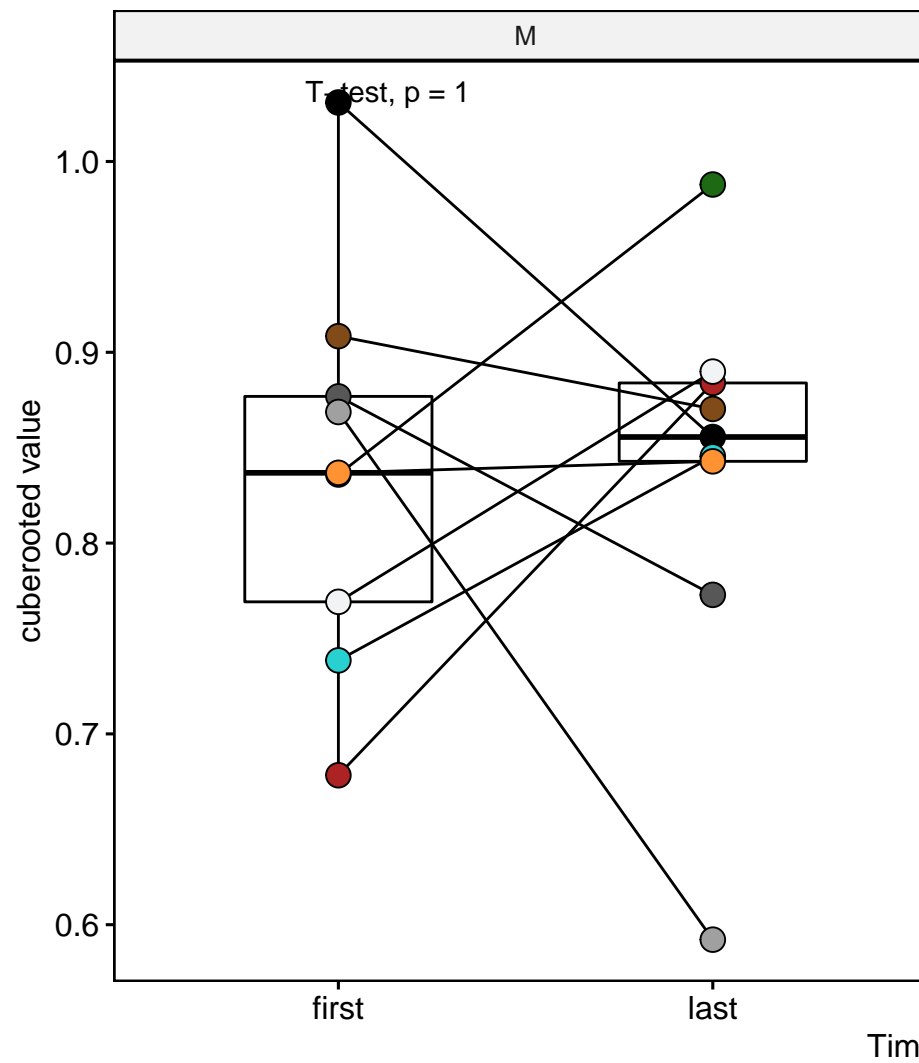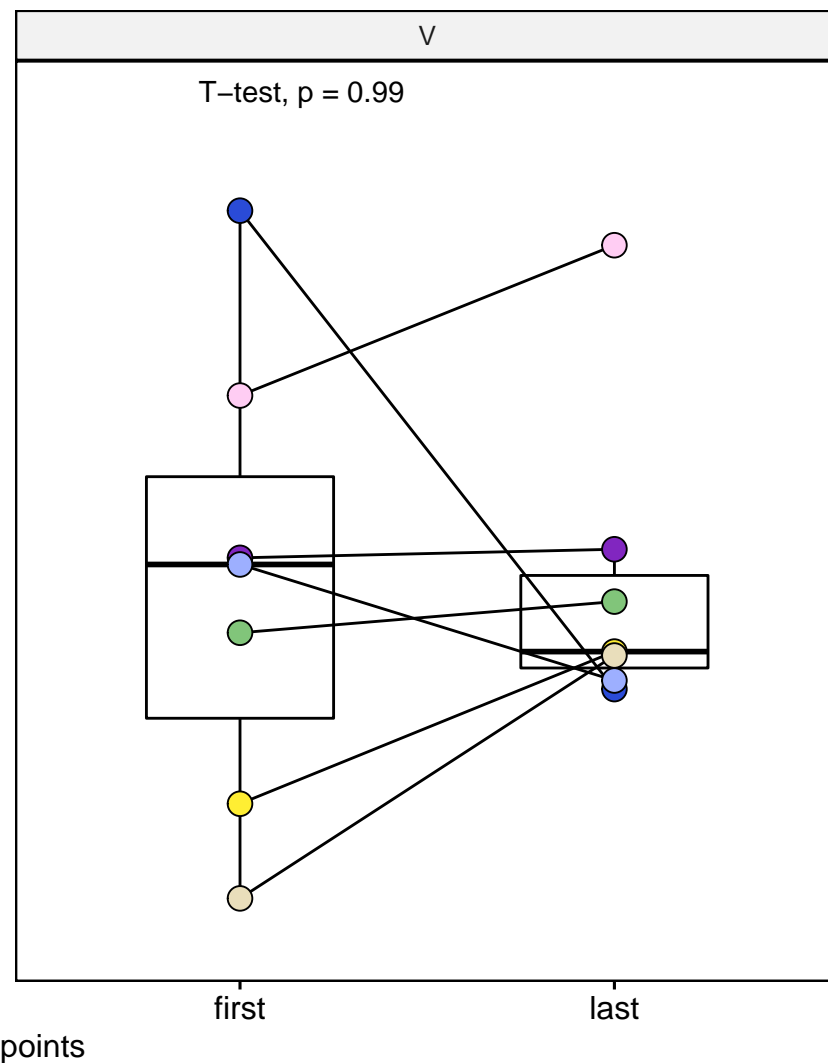

Supplement: s1 [file s1]
