# Supplementary material for: Severe COVID-19 Is Characterised by Perturbations in Plasma Amines Correlated with Immune Response Markers, and Linked to Inflammation and Oxidative Stress
Source: MDPI journal article supplement (doi:10.3390/metabo12070618), 2022-07-02
Supplement: s1 [file s1]

CRP

cube root metabolite ratio  
corrected for age, sex, BMI

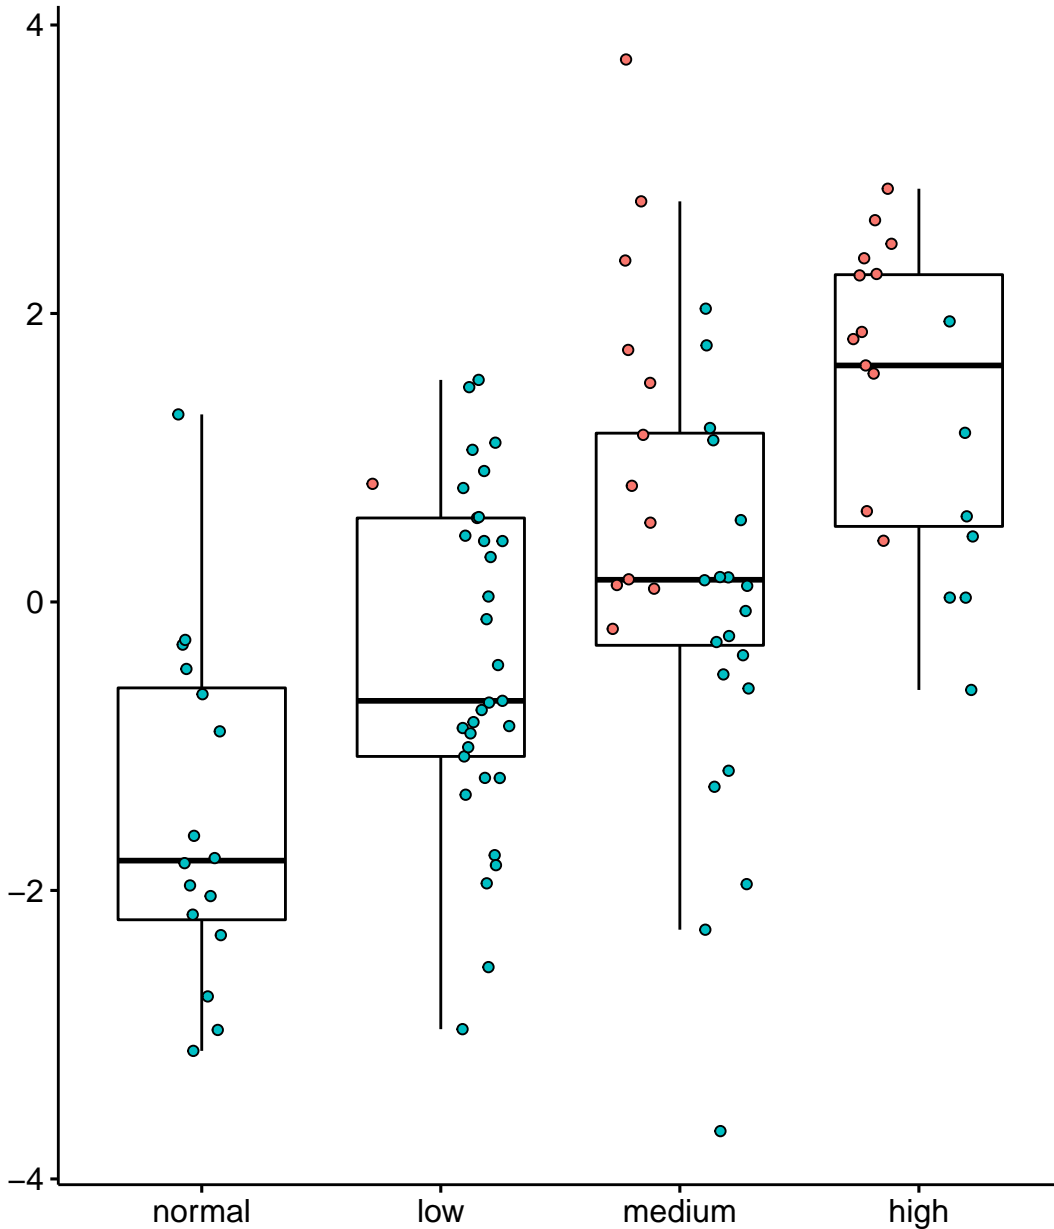

Location

ICU  
ward

# L.Glutamine\_amines

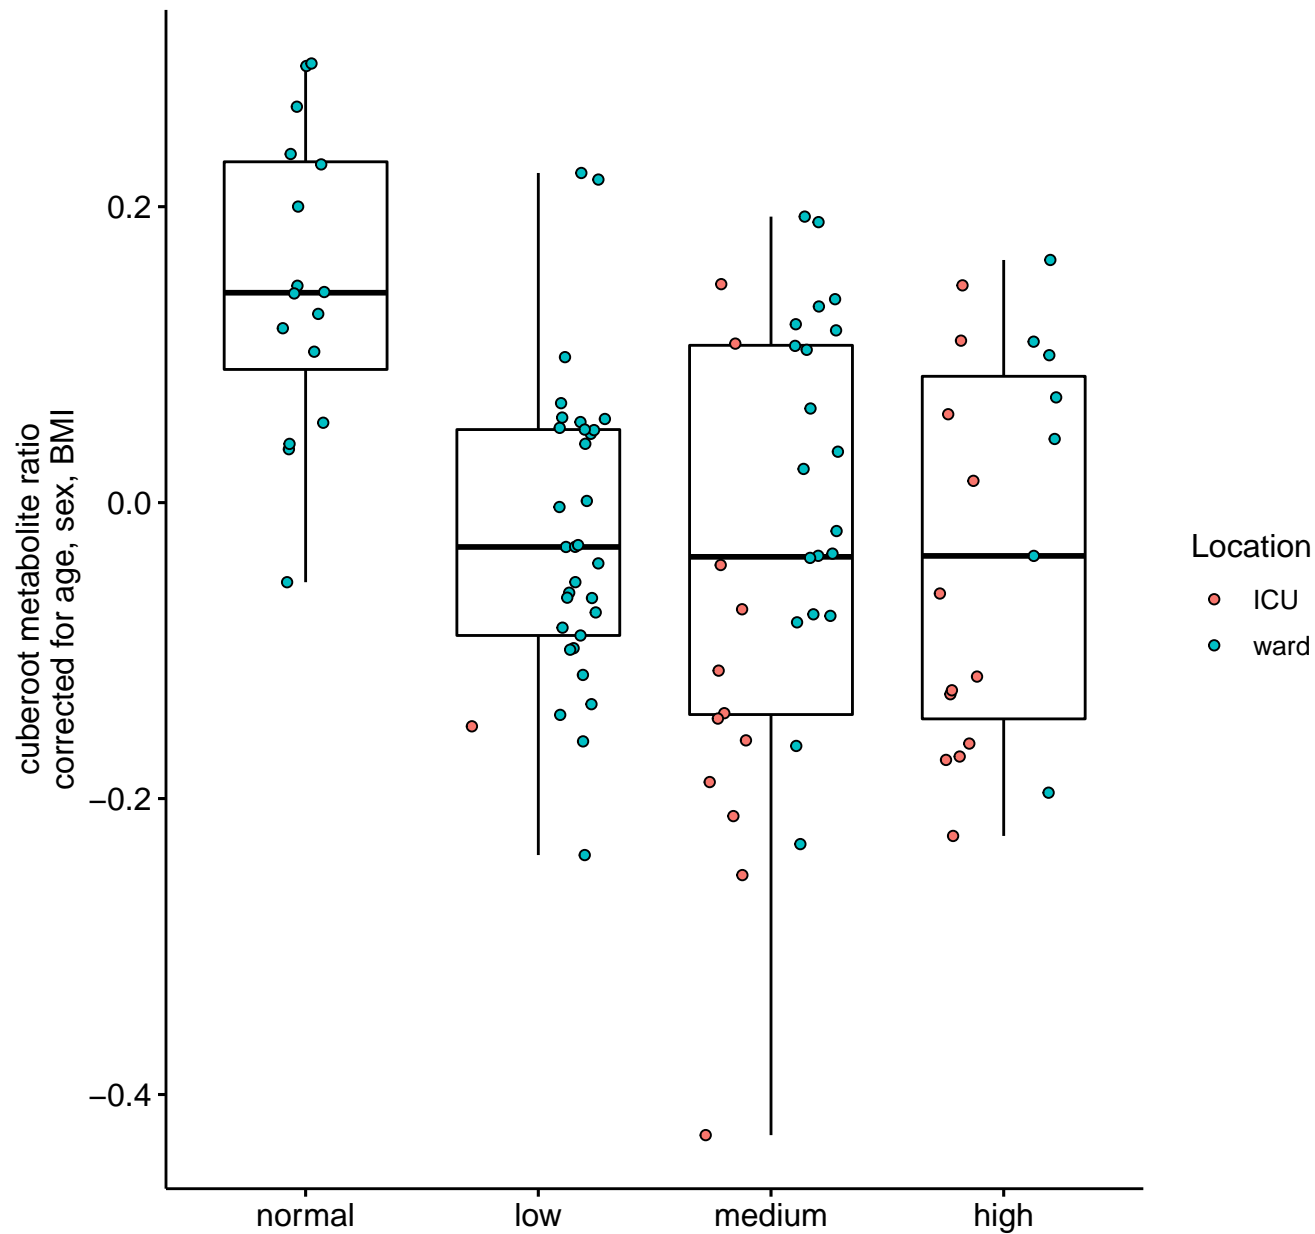

TNF $\alpha$

cube root metabolite ratio  
corrected for age, sex, BMI

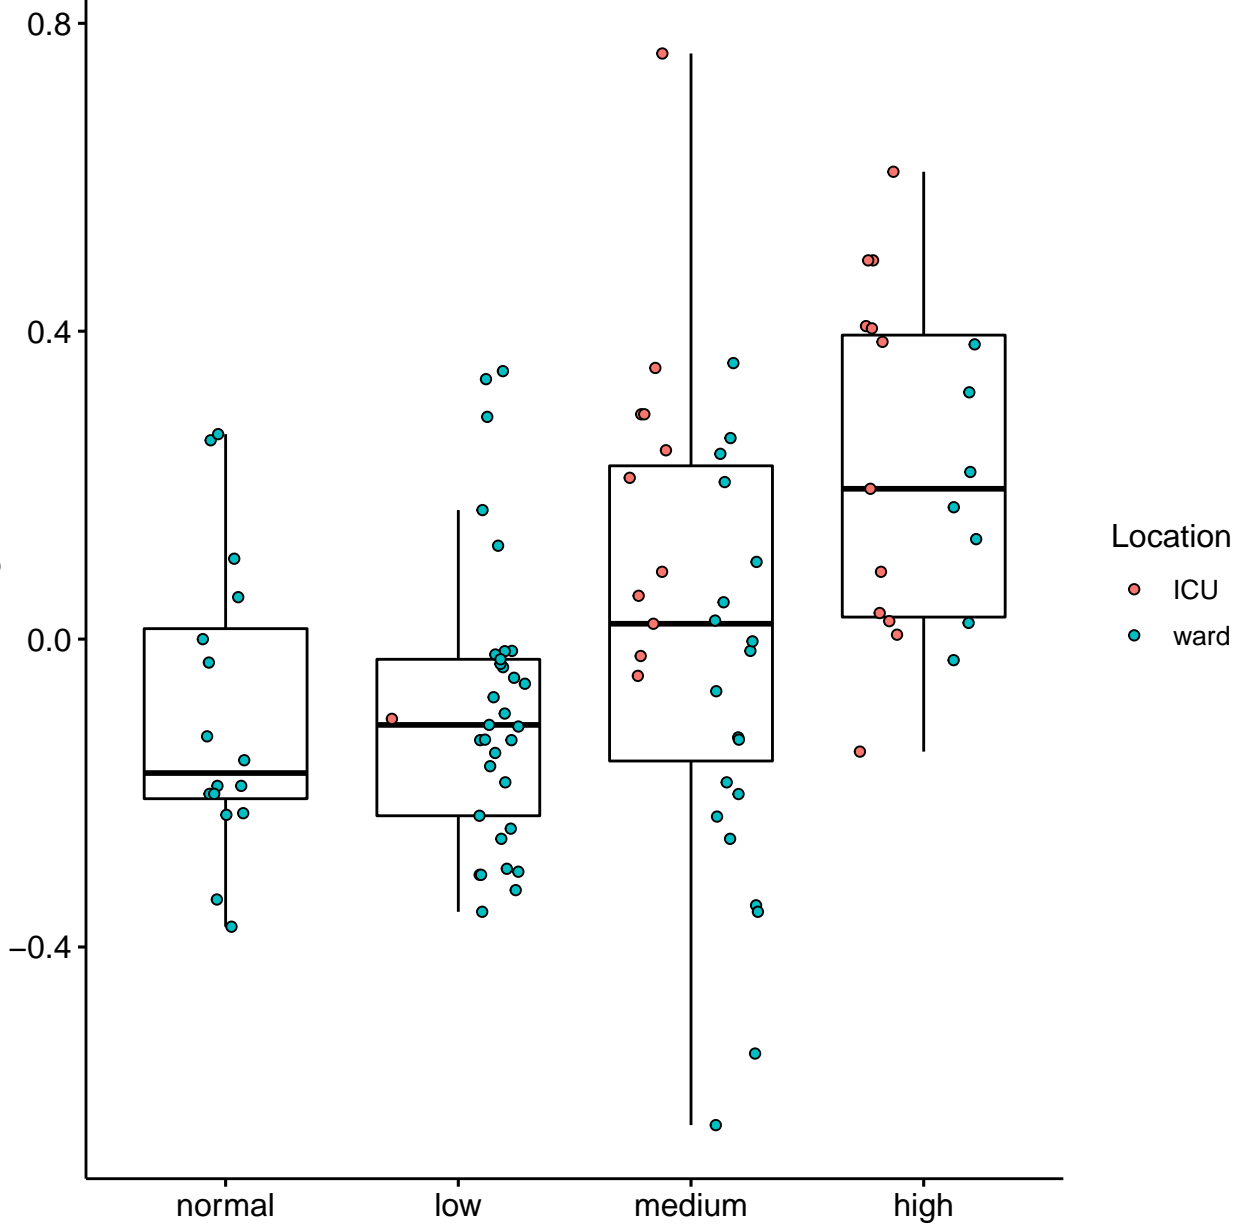

# L.2.aminoadipic.acid\_amines

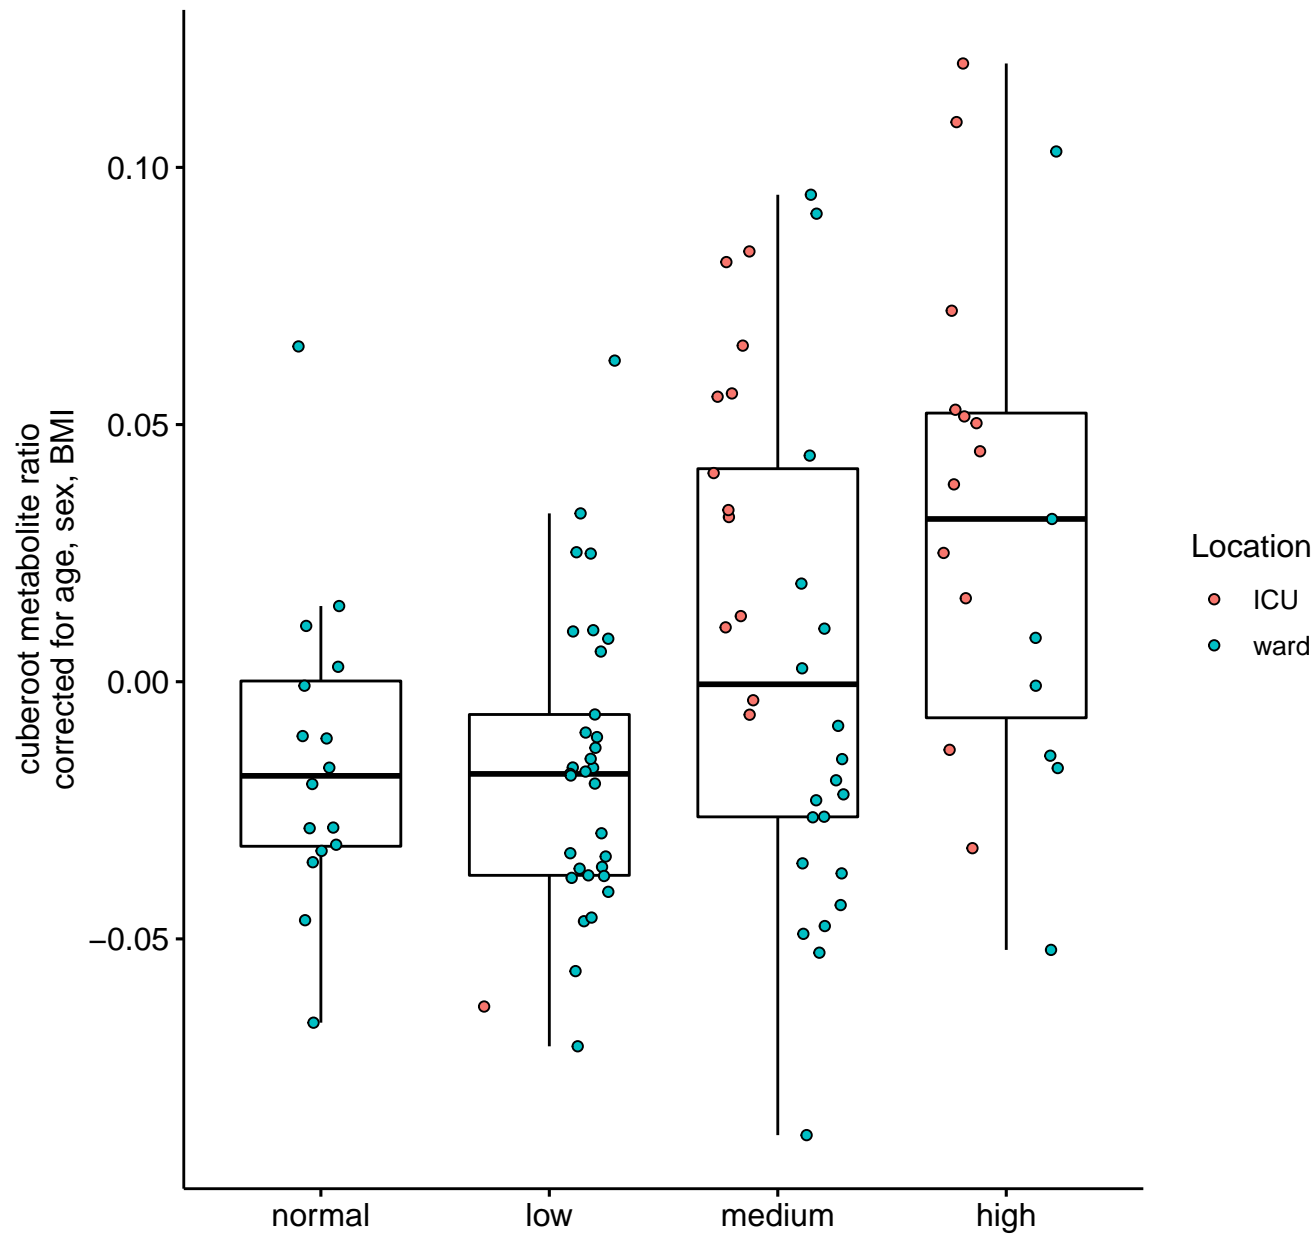

IFNG

cube root metabolite ratio  
corrected for age, sex, BMI

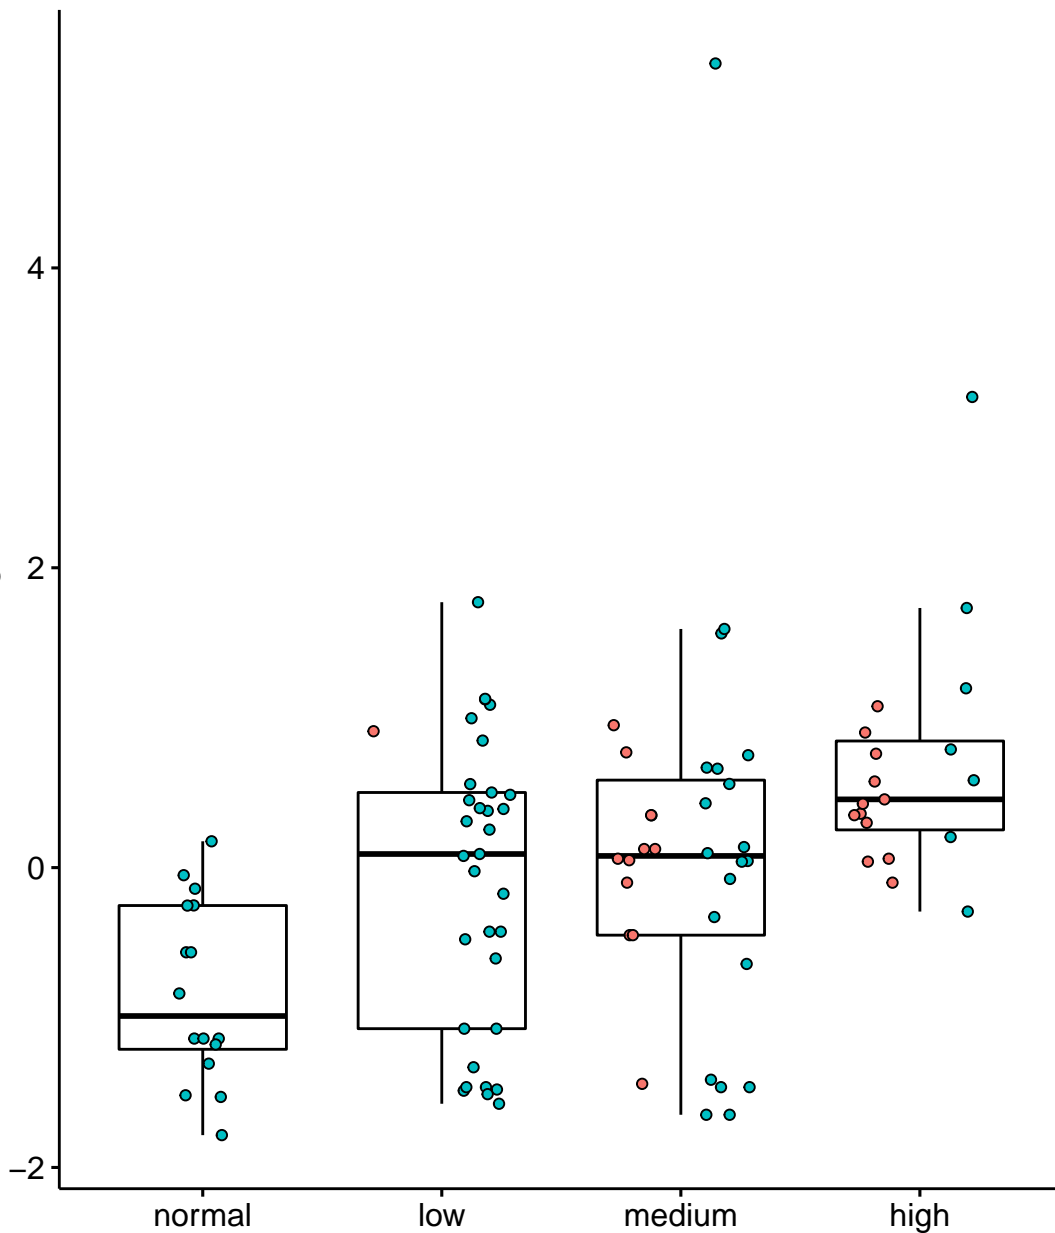

Location

ICU

ward

sHMr

cube root metabolite ratio  
corrected for age, sex, BMI

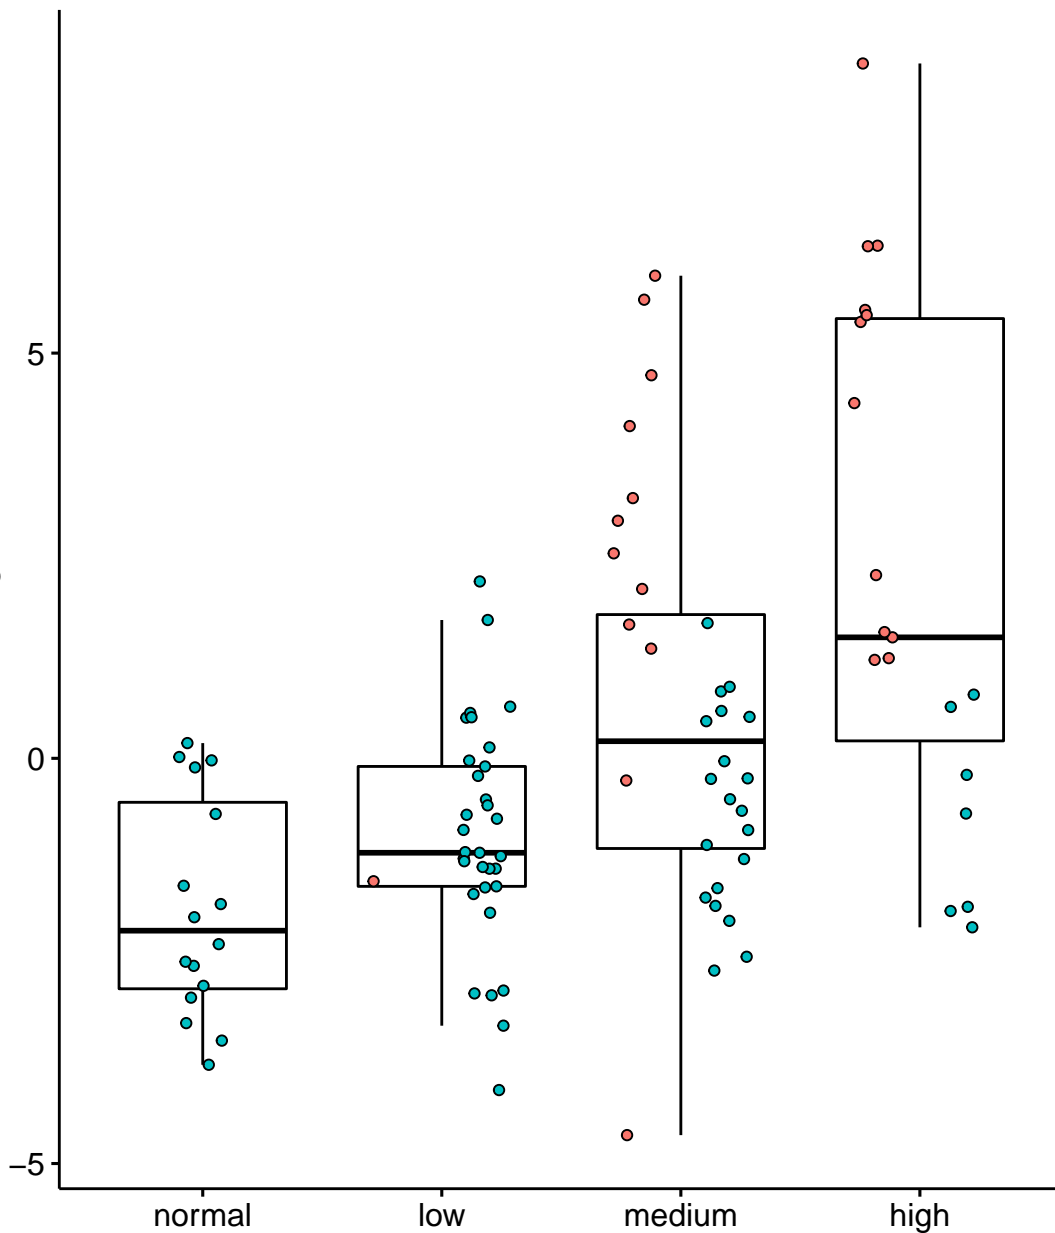

Location

ICU  
ward

# N6.N6.N6.Trimethyl.L.lysine\_amines

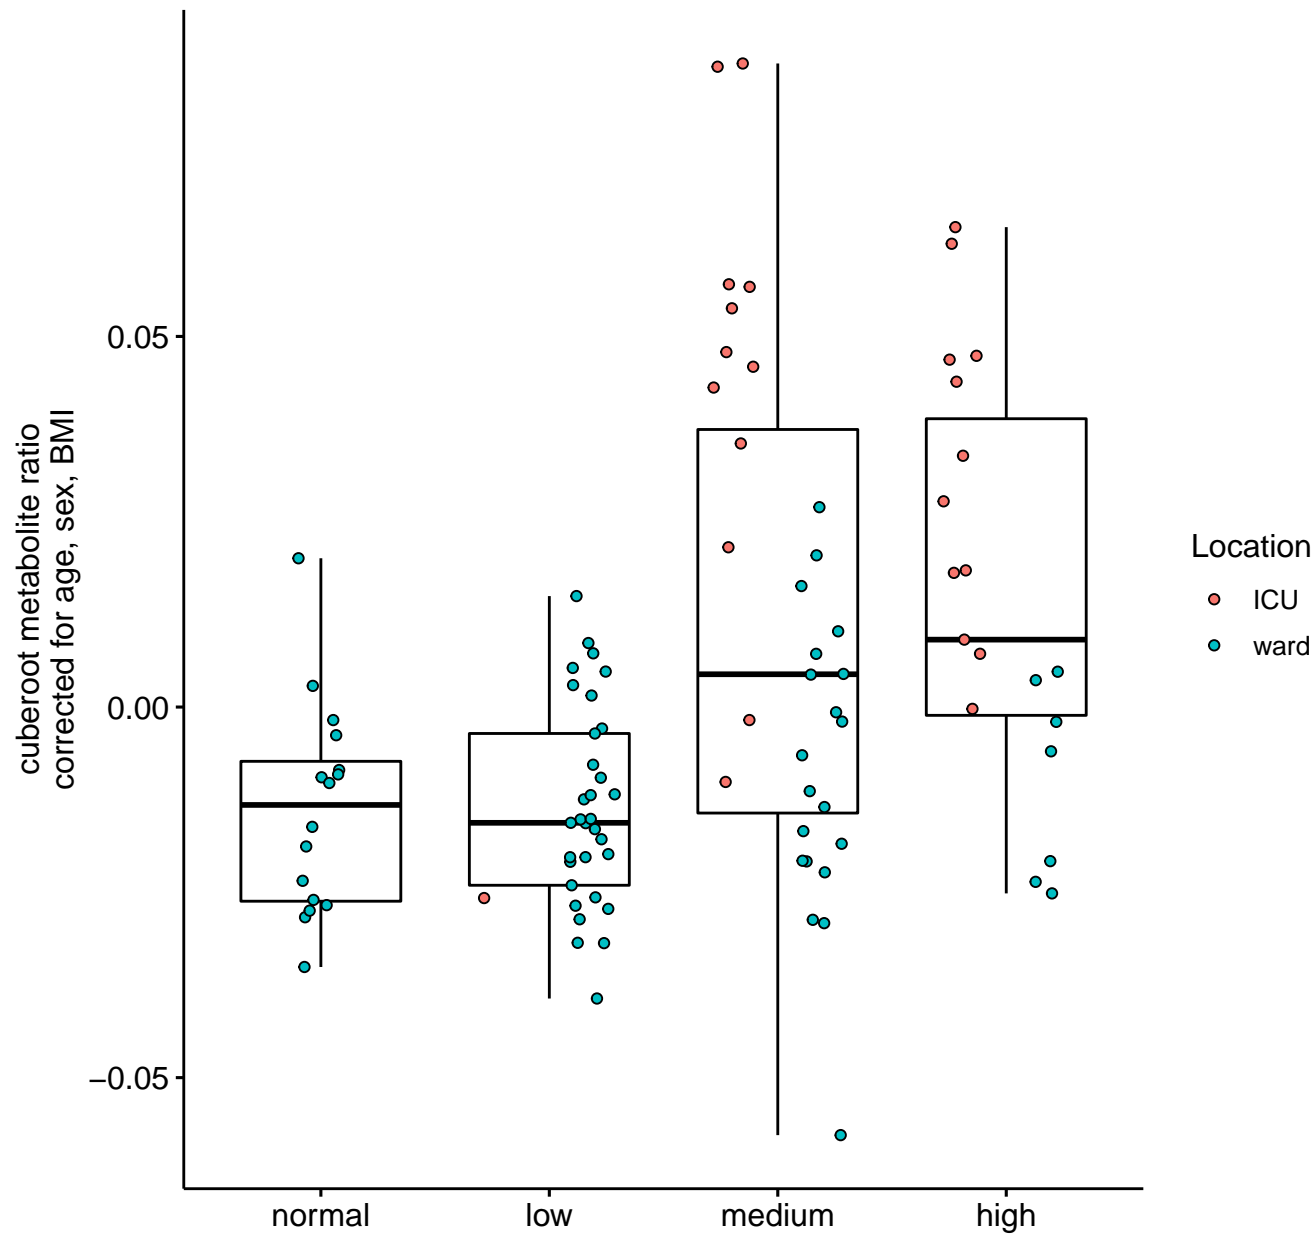

# S.Methylcysteine\_amines

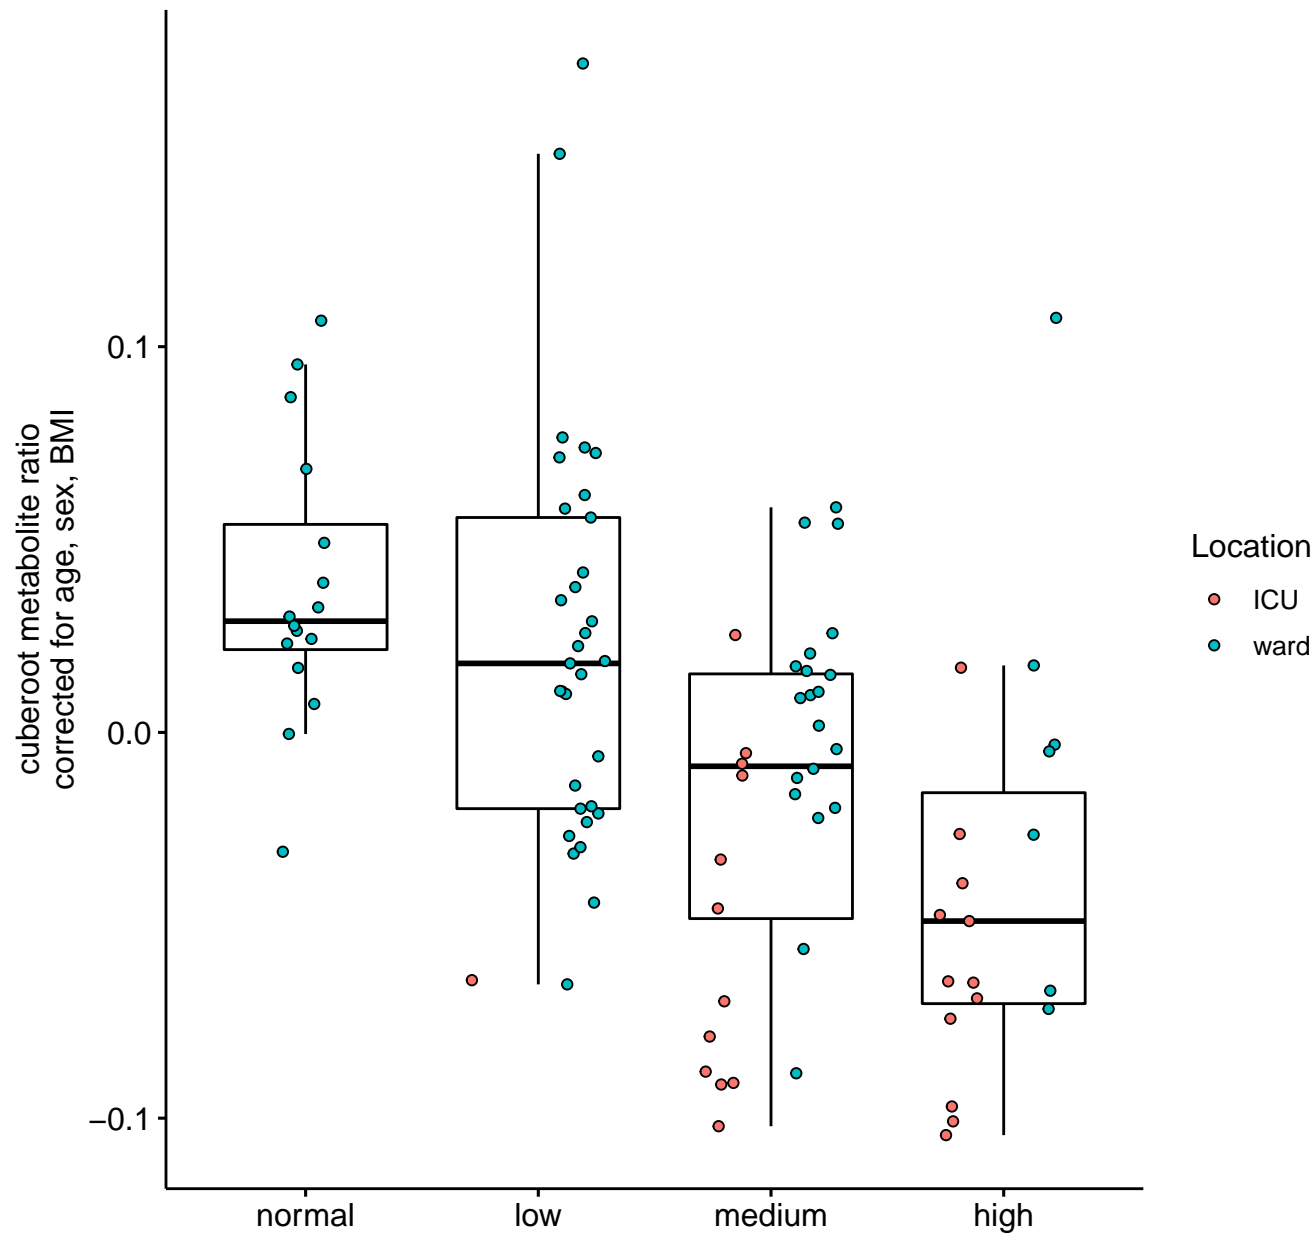



# CXCL10

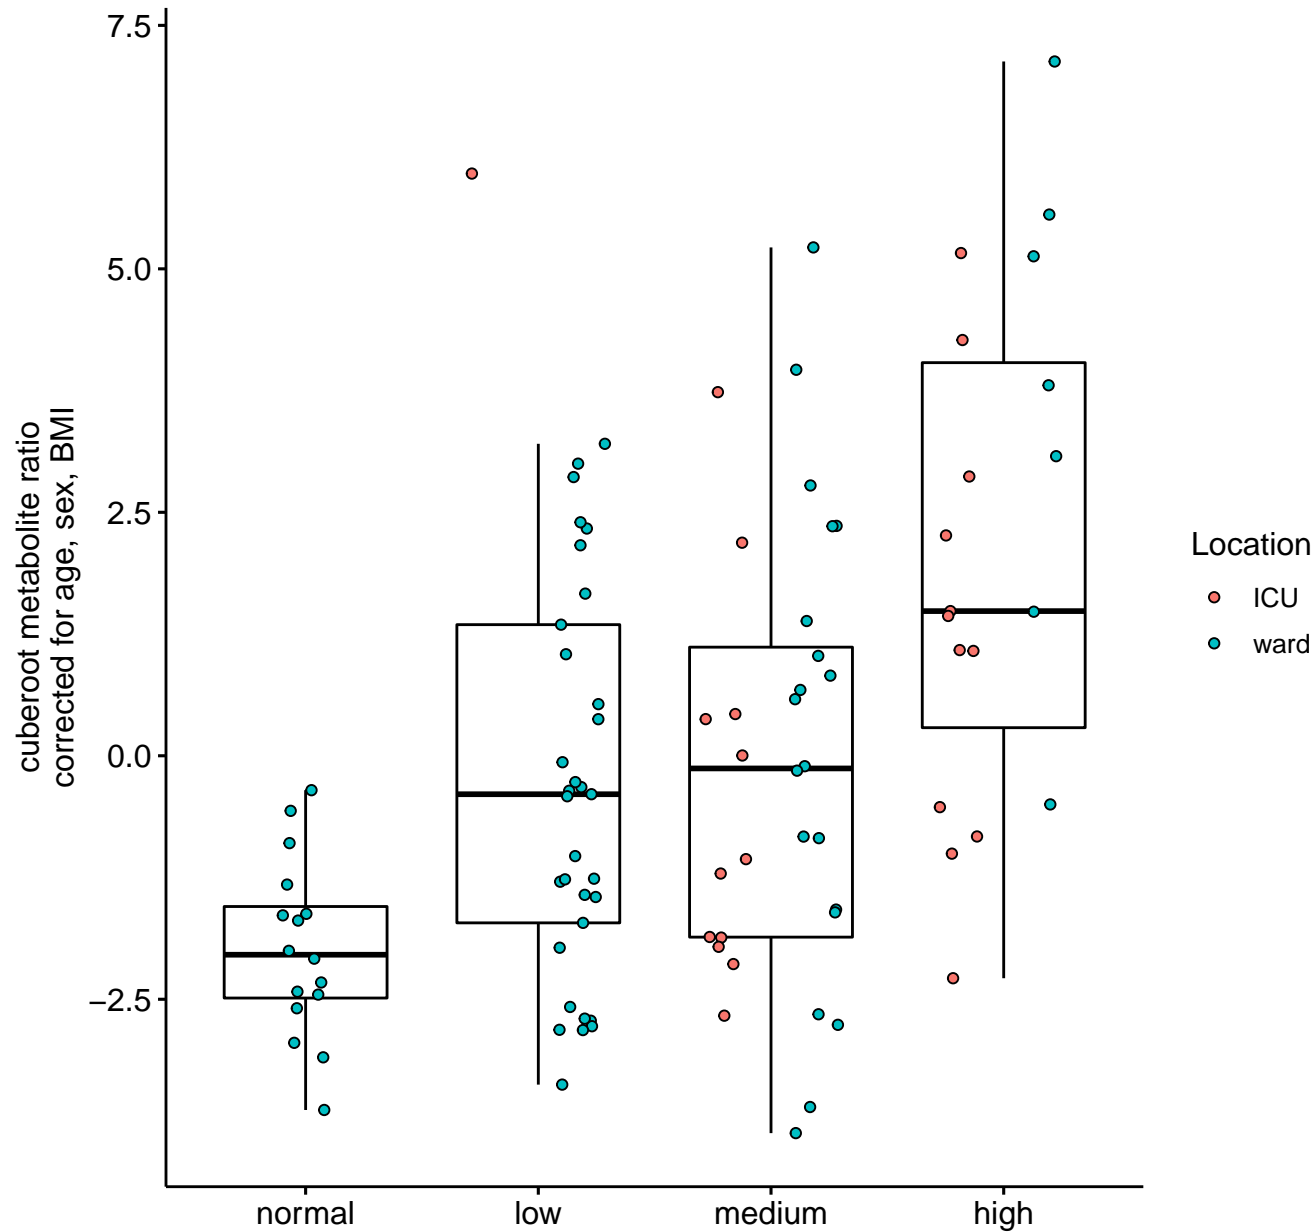

# L.Methionine.sulfoxide\_amines

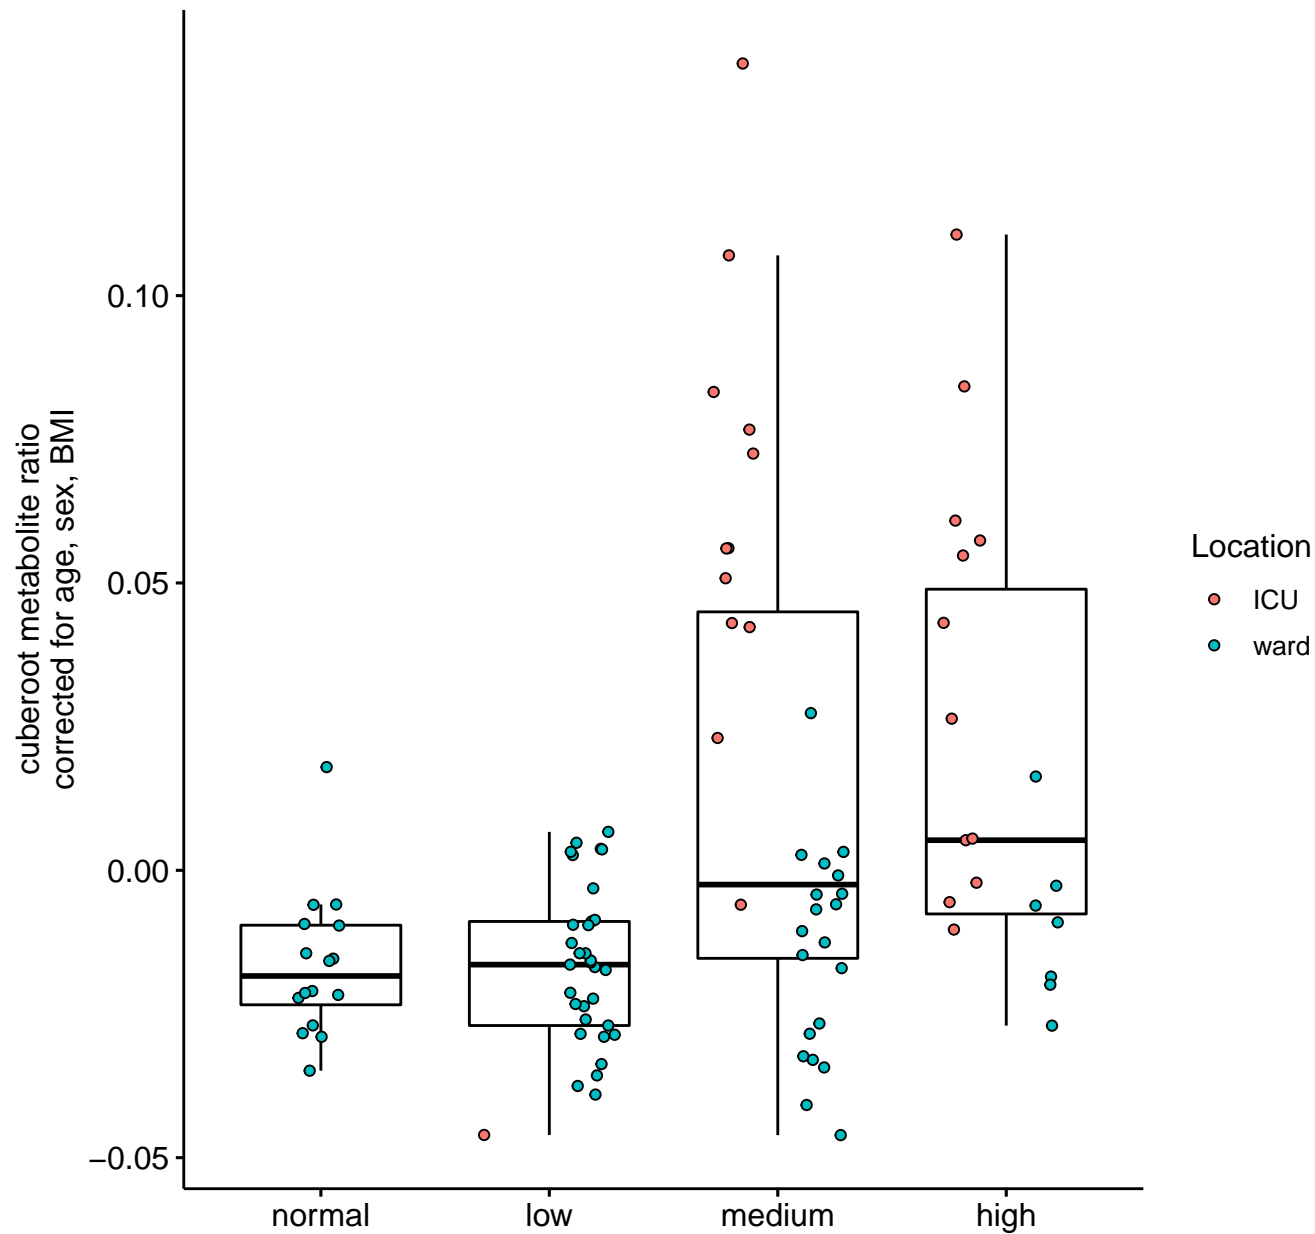

# GMCSF

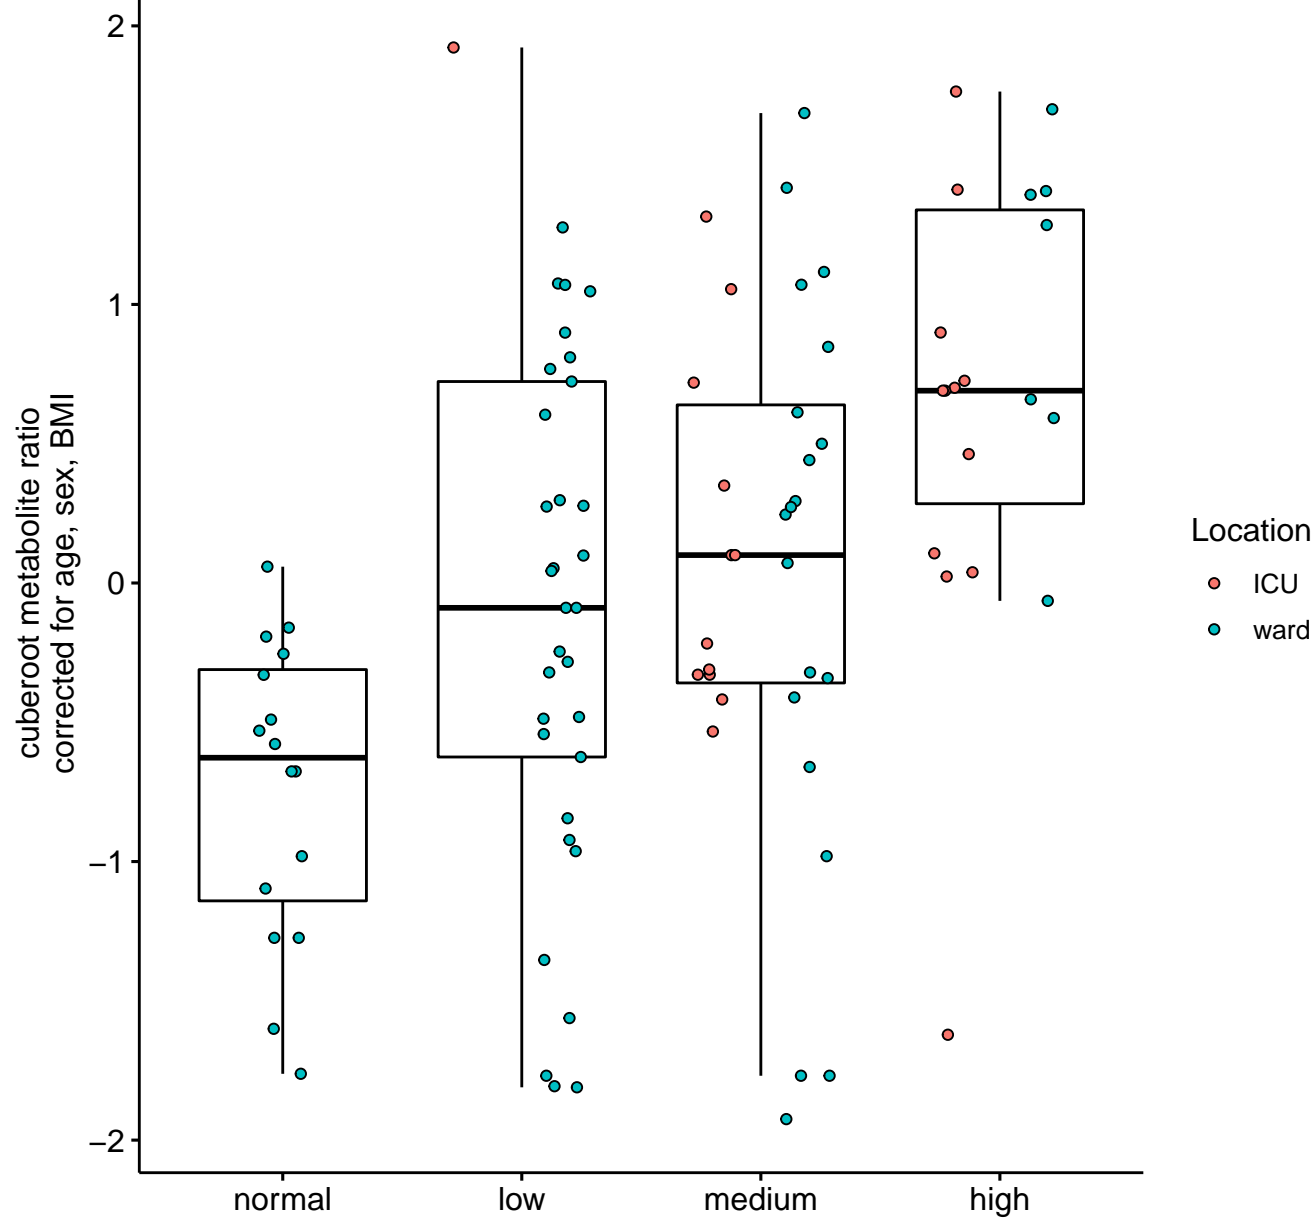

# L.Threonine\_amines

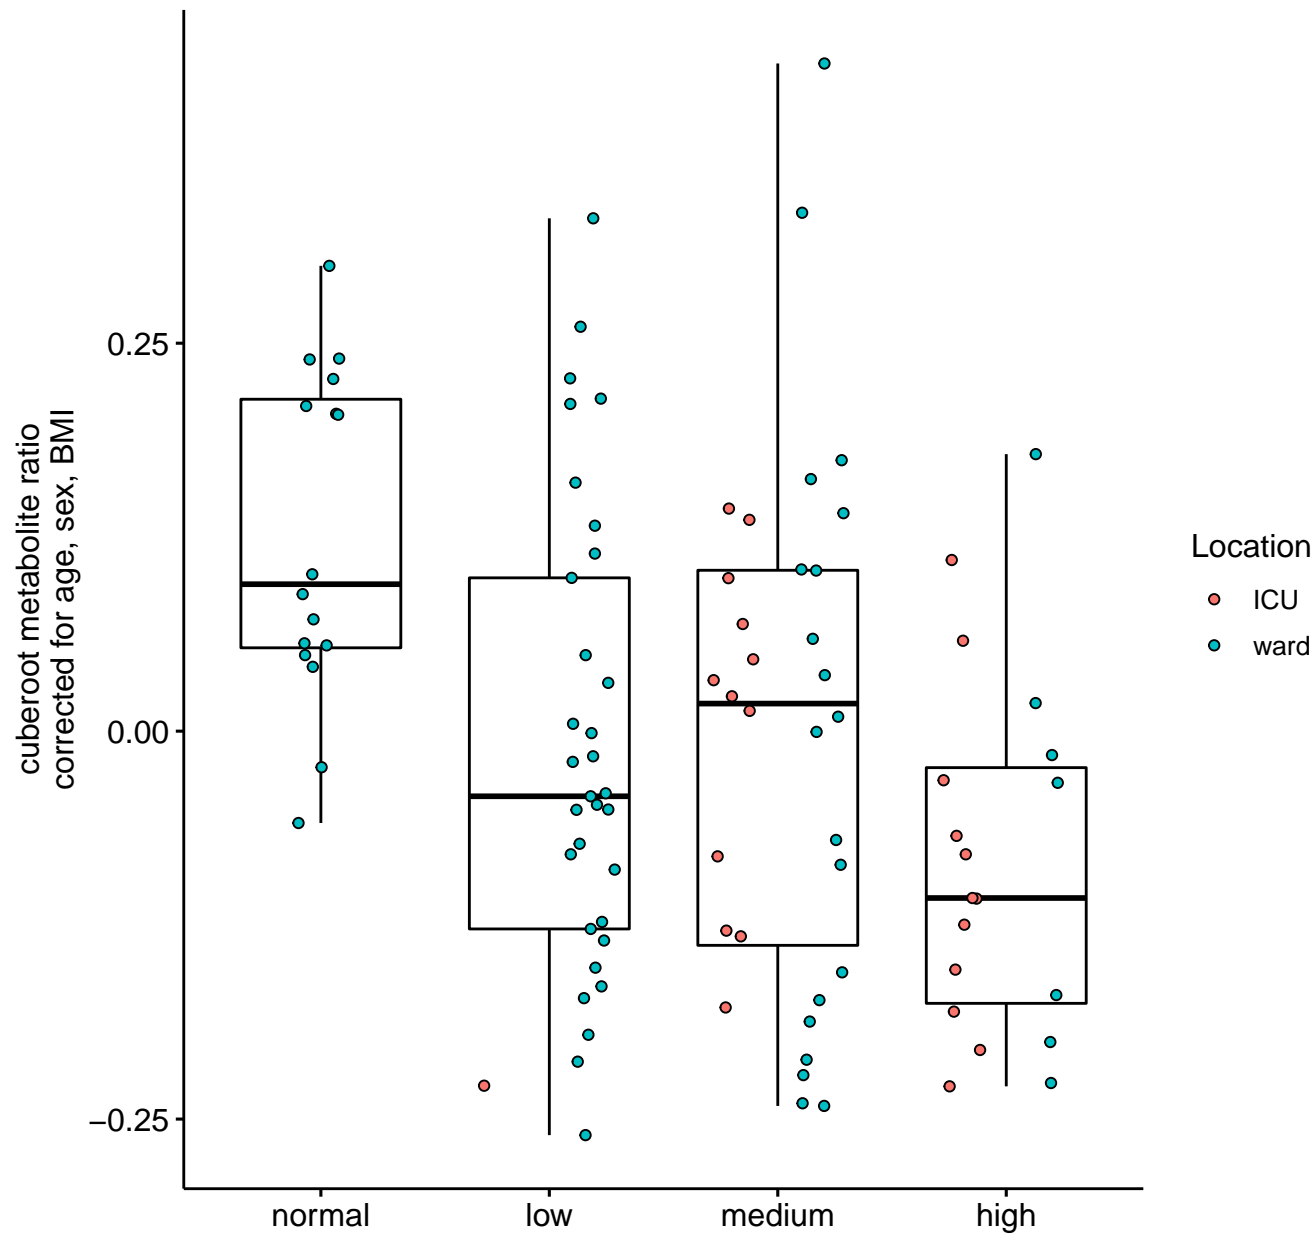

Kyn\_Trp

cube root metabolite ratio  
corrected for age, sex, BMI

0.1  
0.0

normal

low

medium

high

Location

ICU  
ward

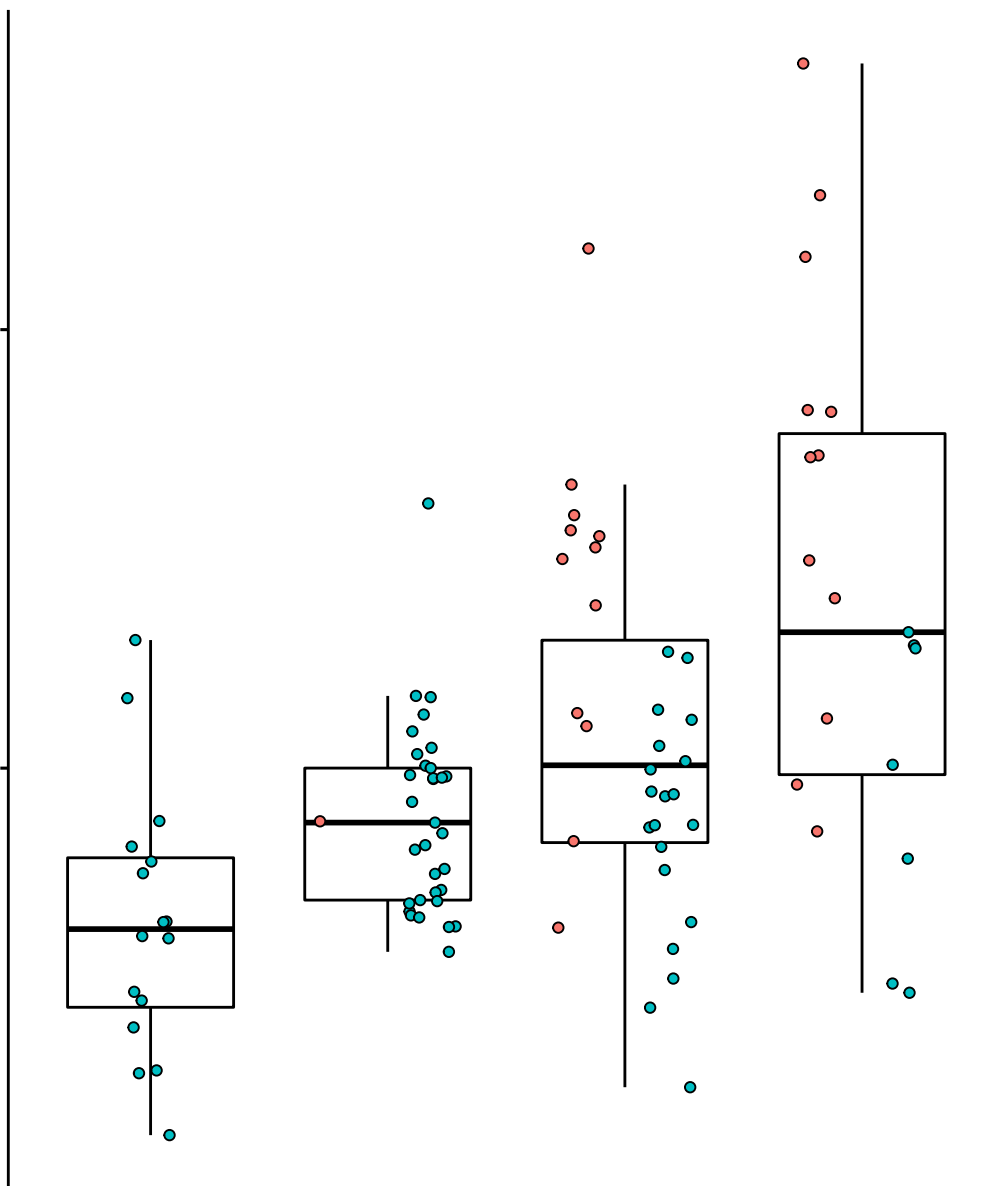

# Glycylglycine\_amines

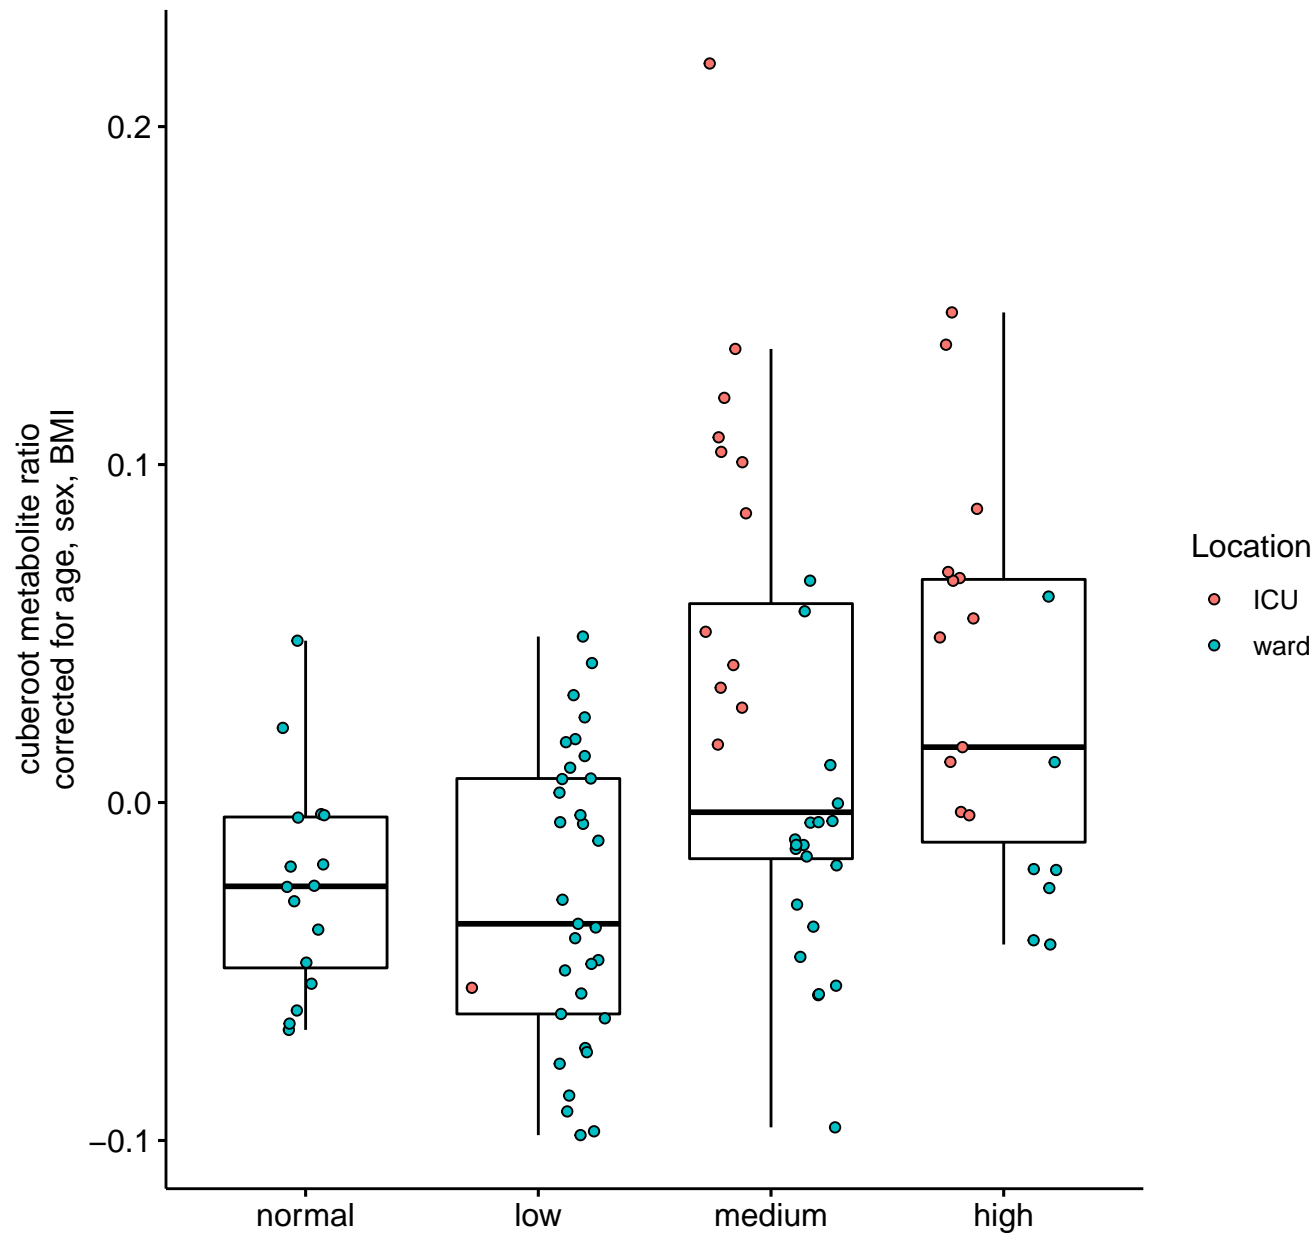

# Ferritin

cuberoor metabolite ratio  
corrected for age, sex, BMI

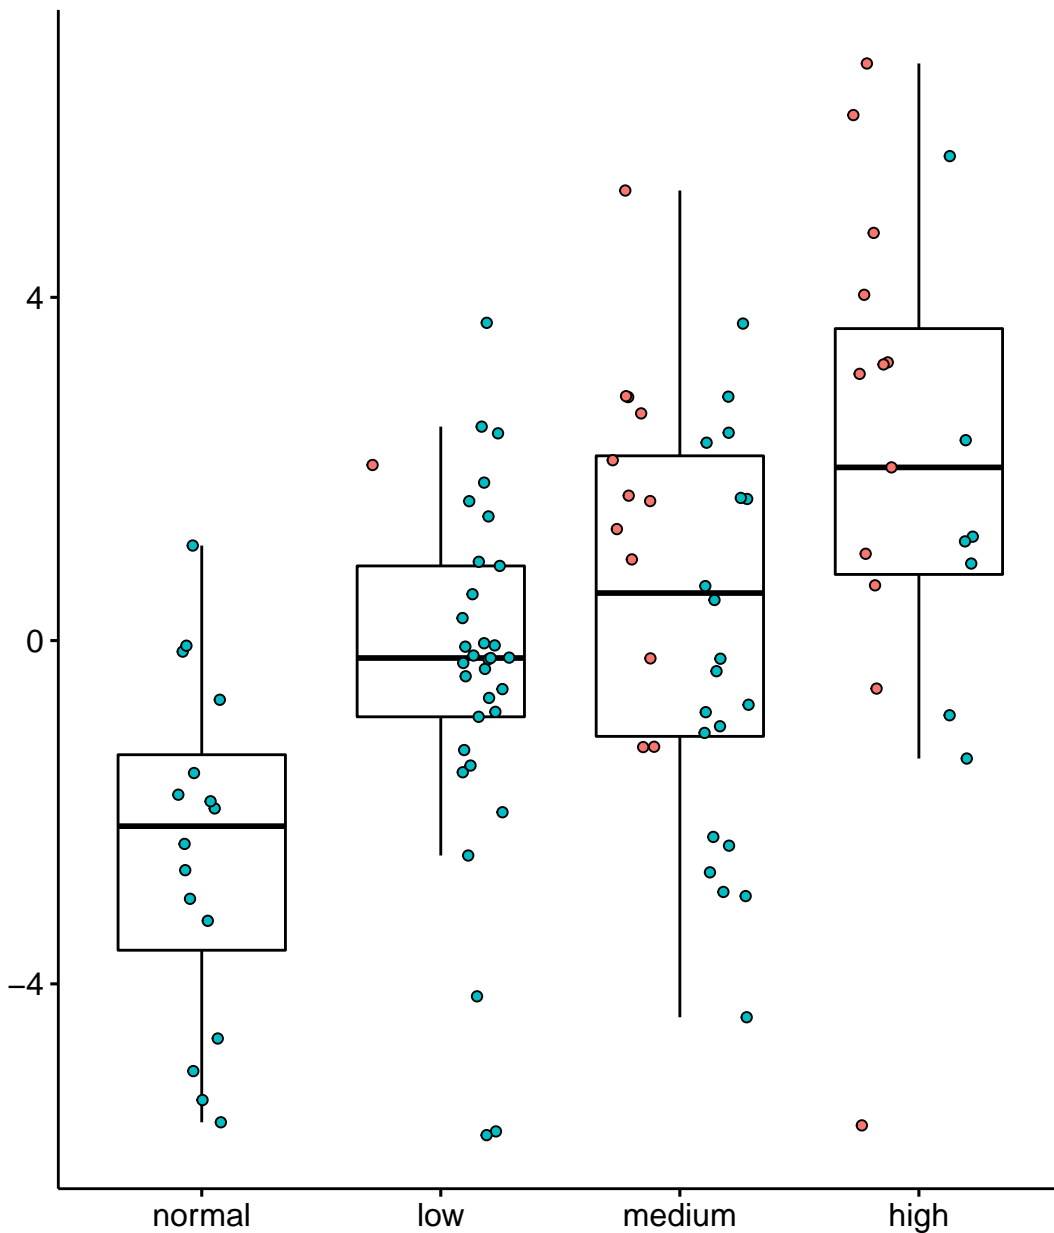

Location

- ICU
- ward

# L.Lysine\_amines

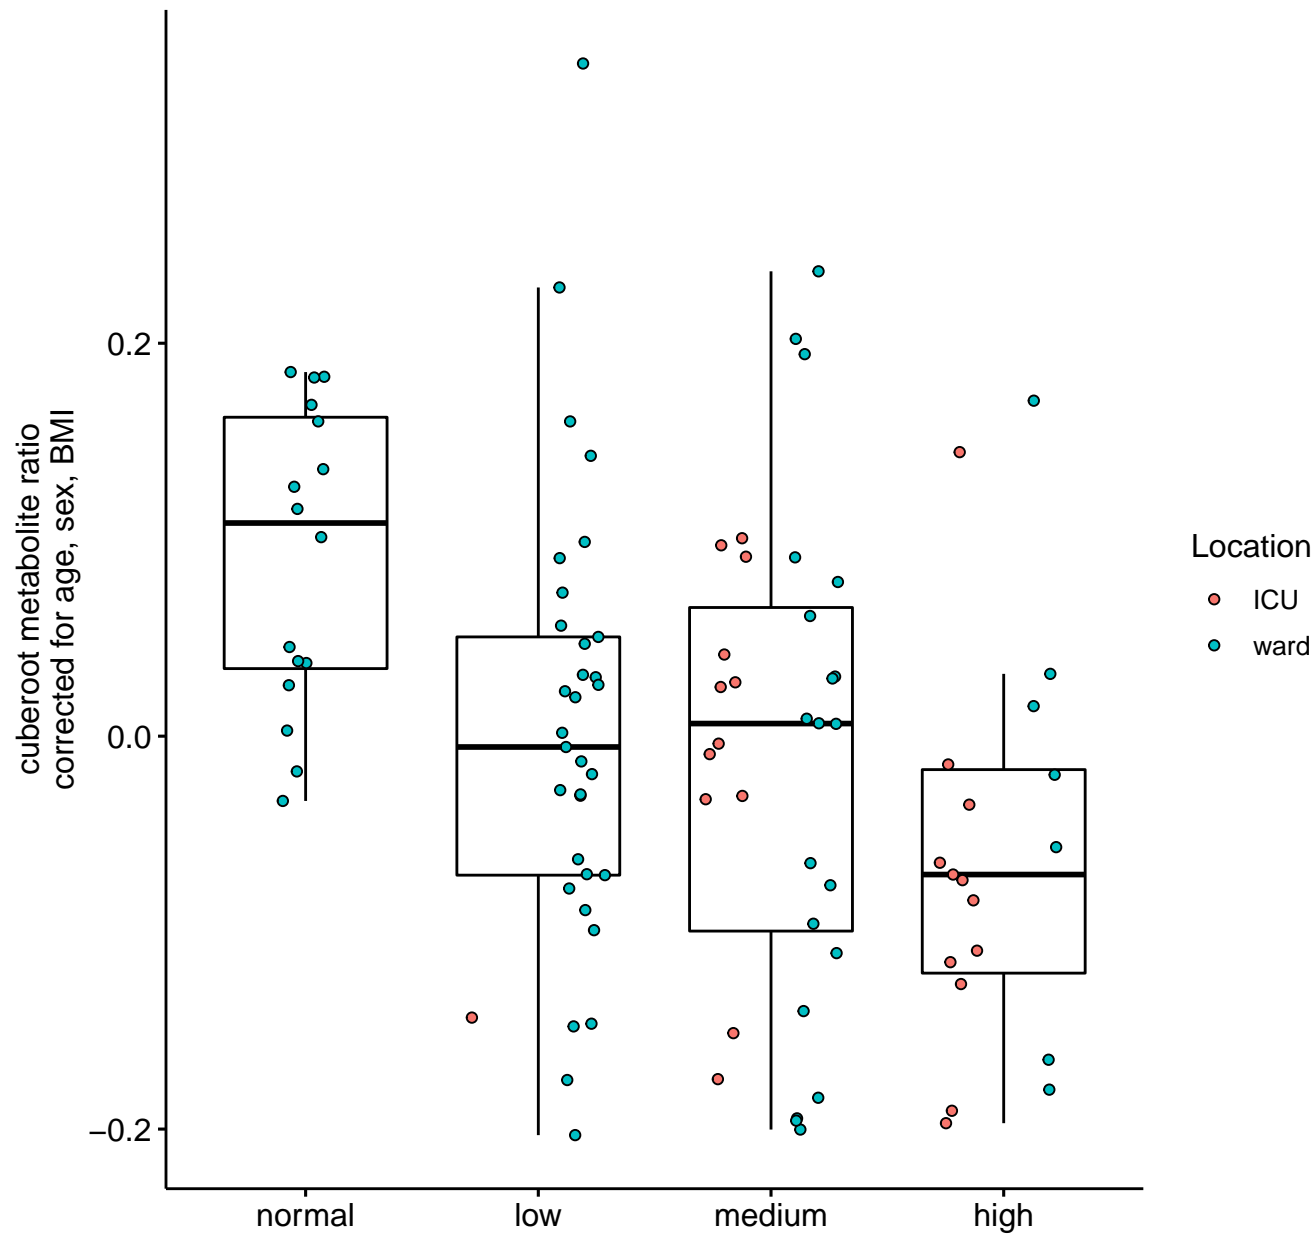



# Glutathione\_amines

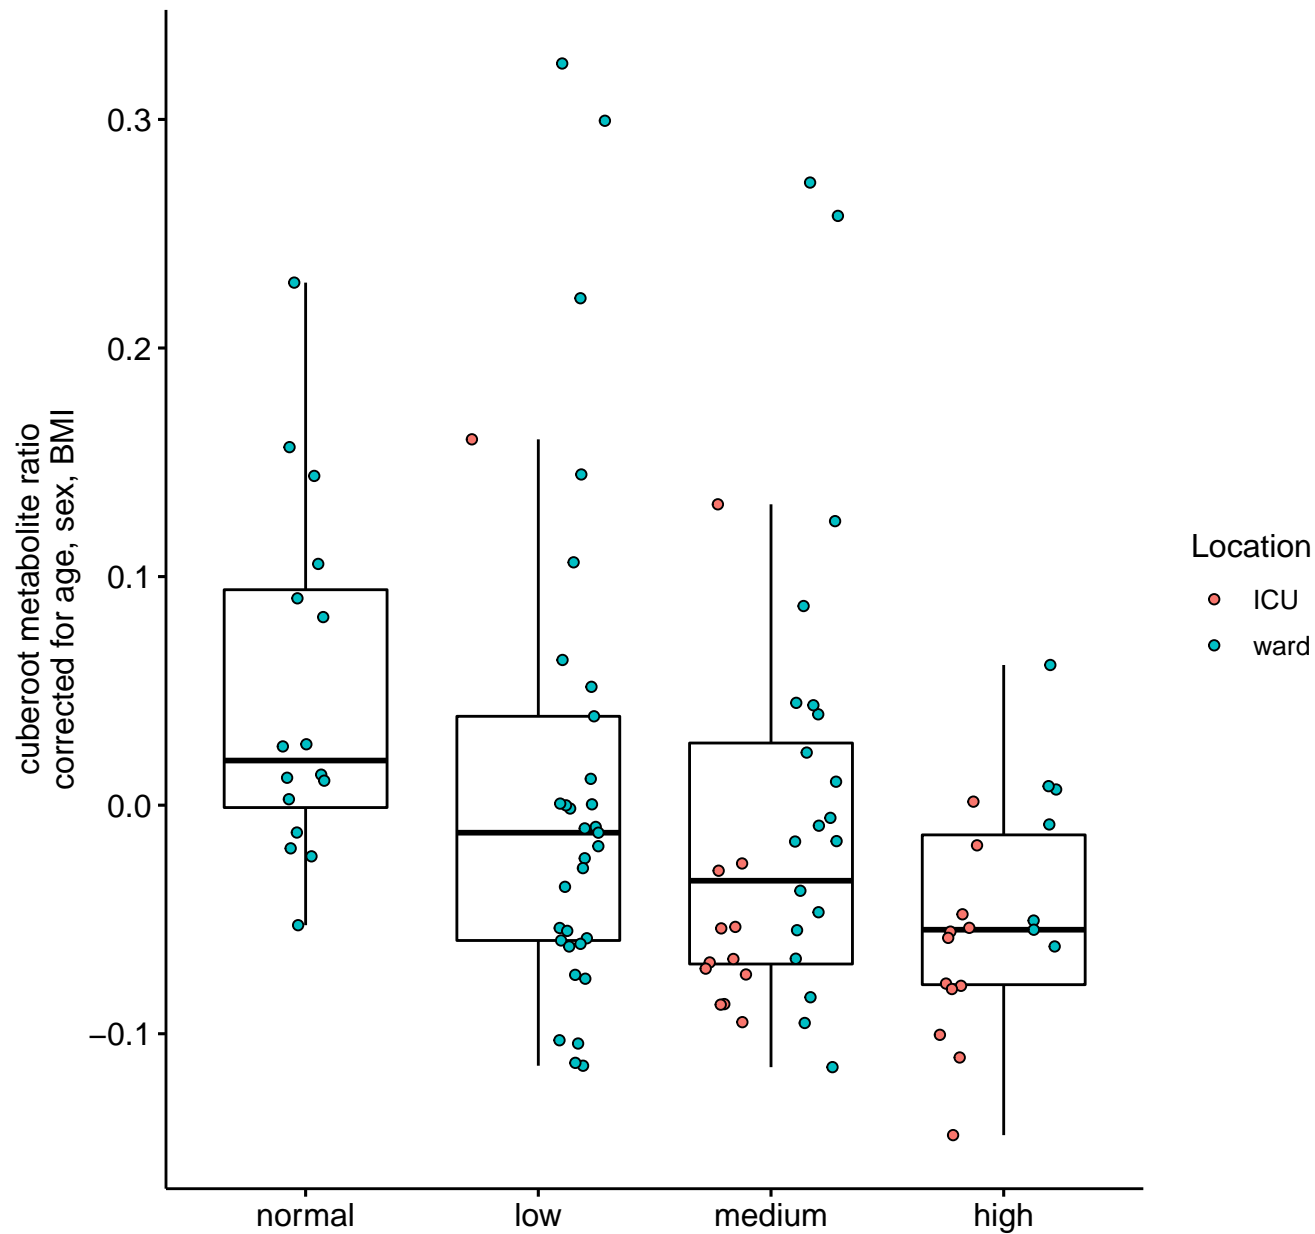

# Glycine\_amines

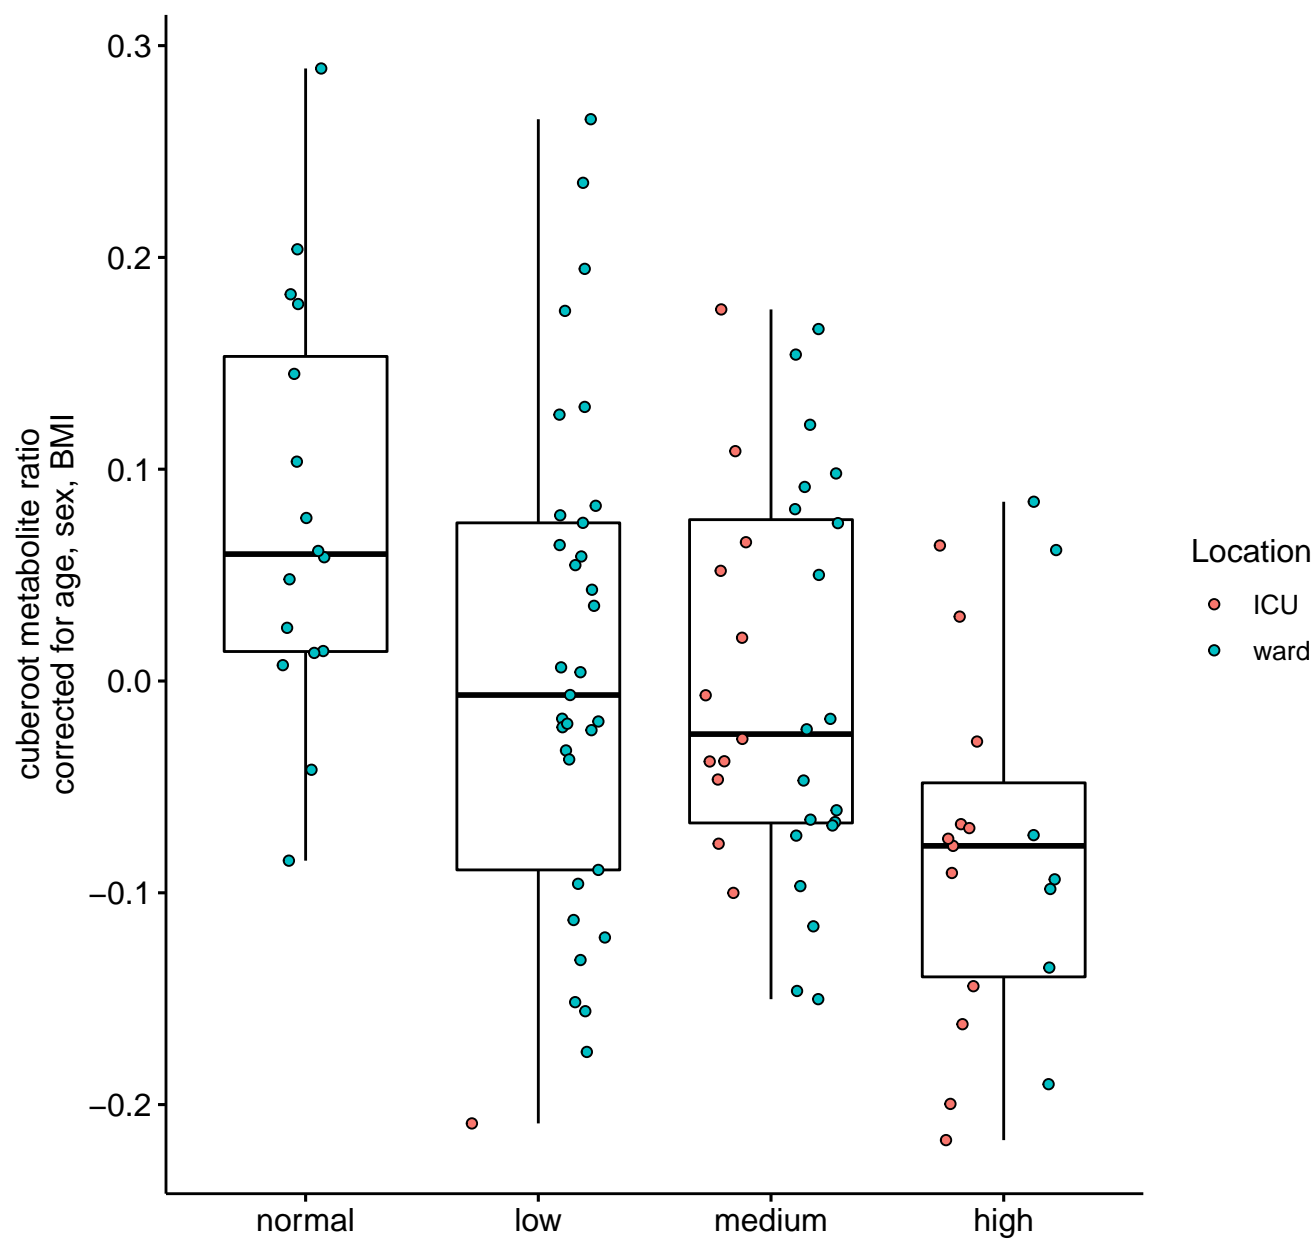

# Methionine.sulfone\_amines

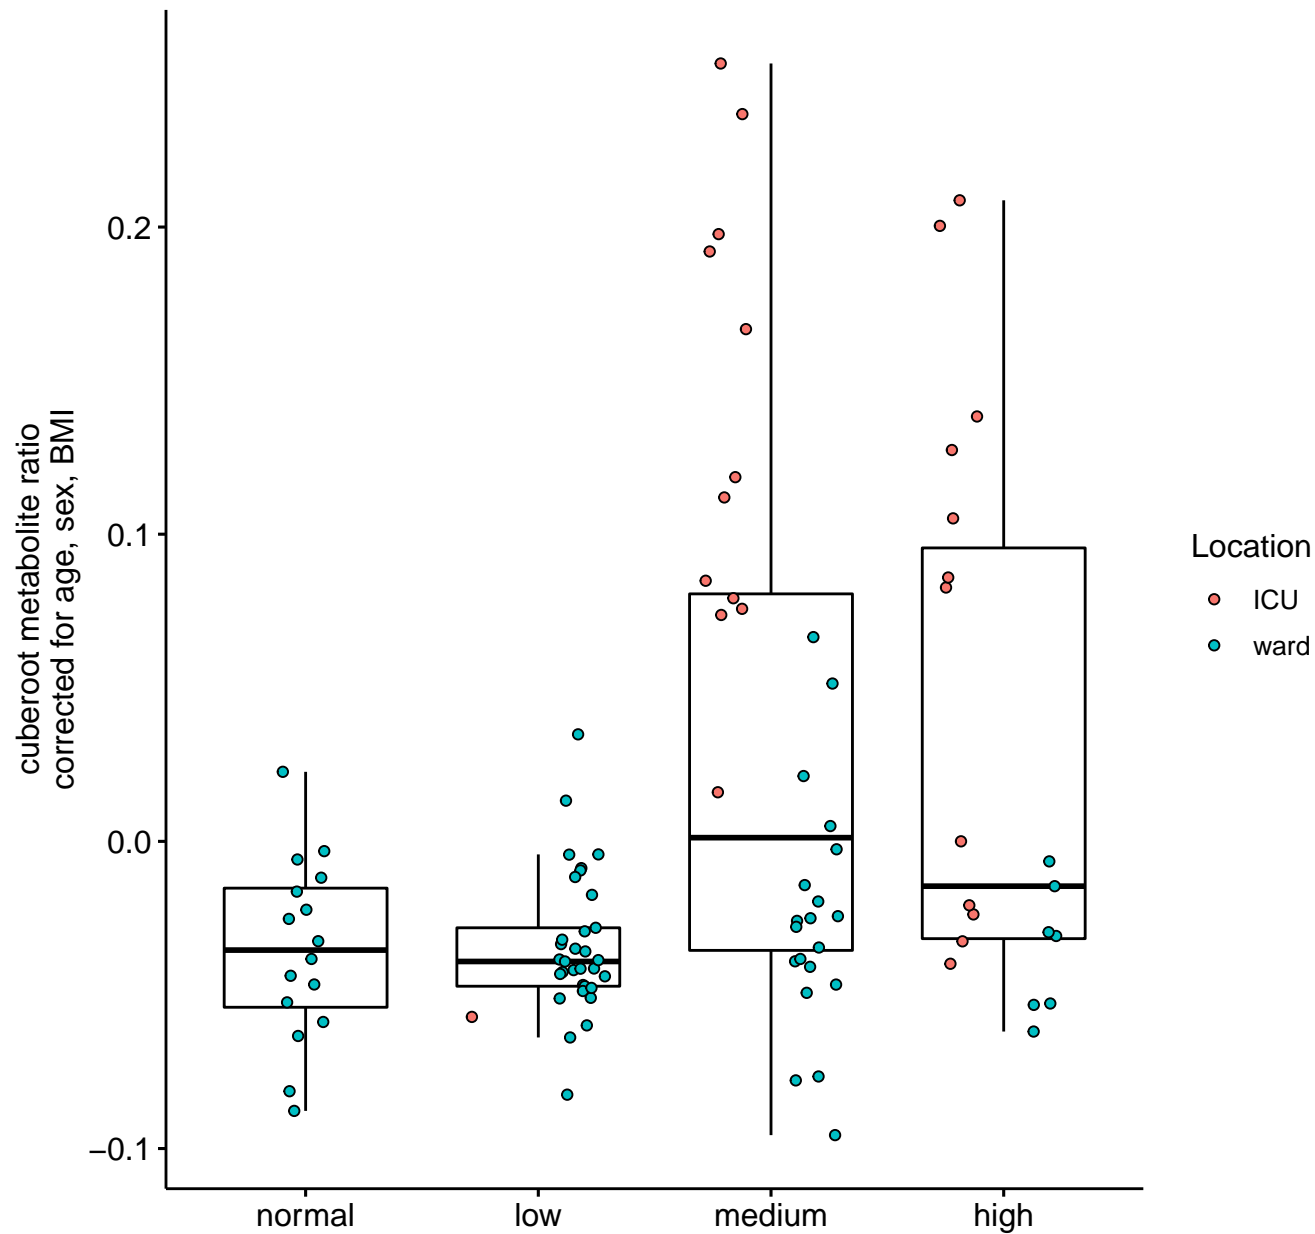

Ratio4\_8

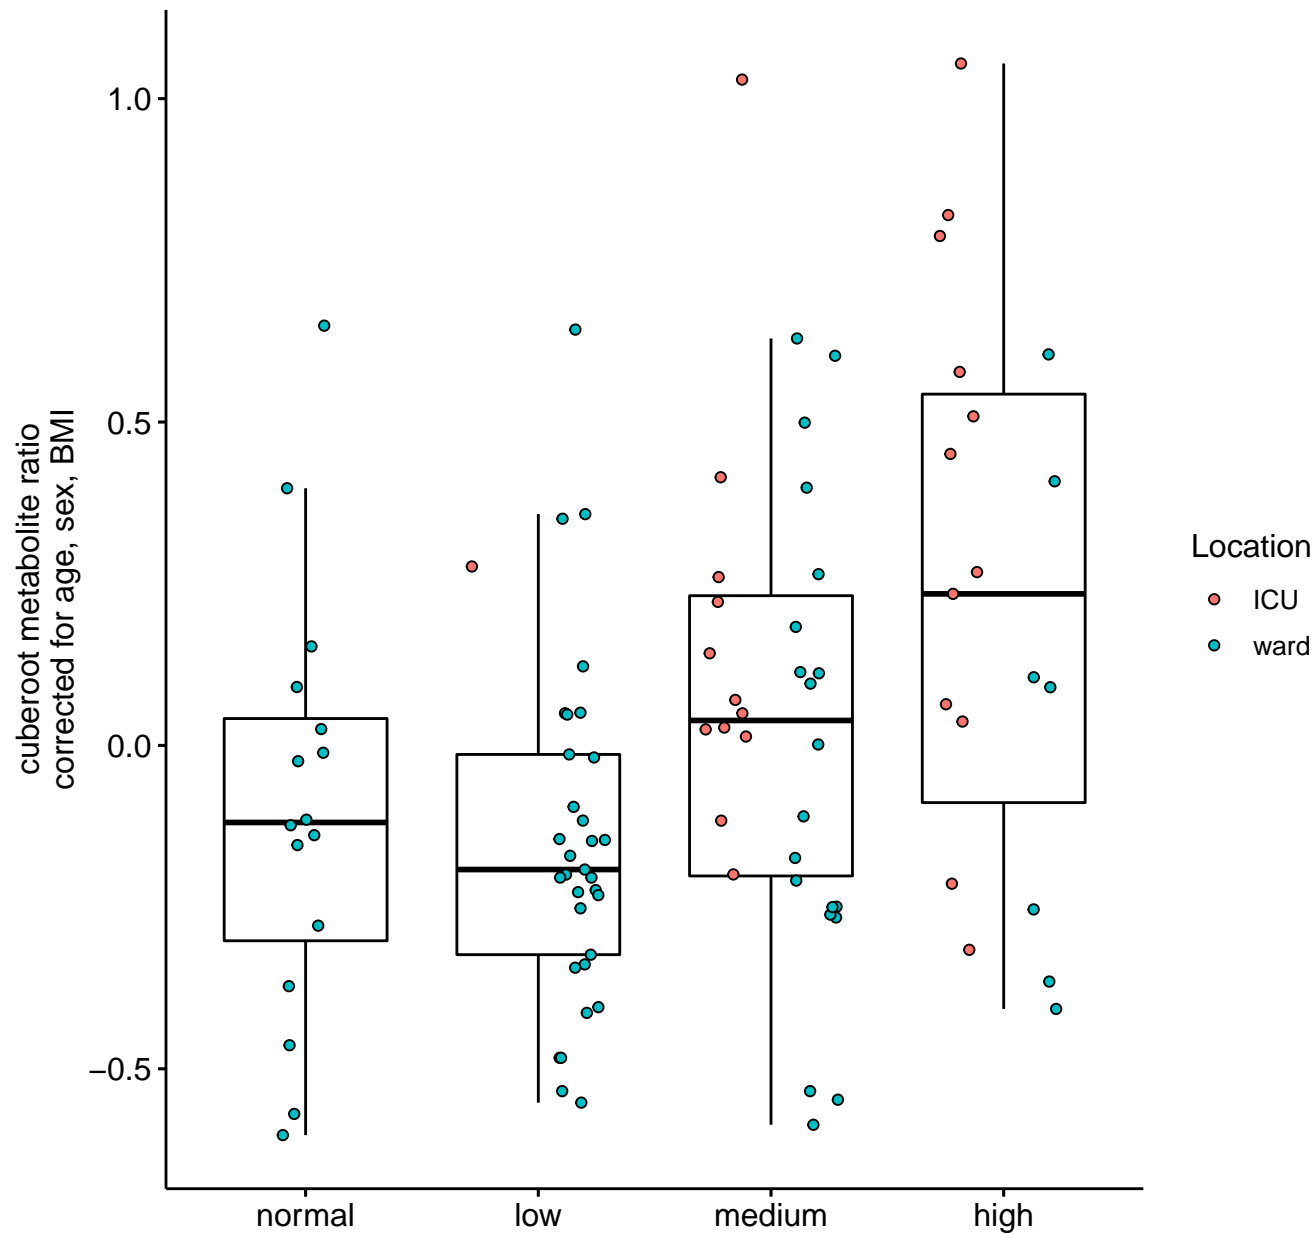

# L.Serine\_amines

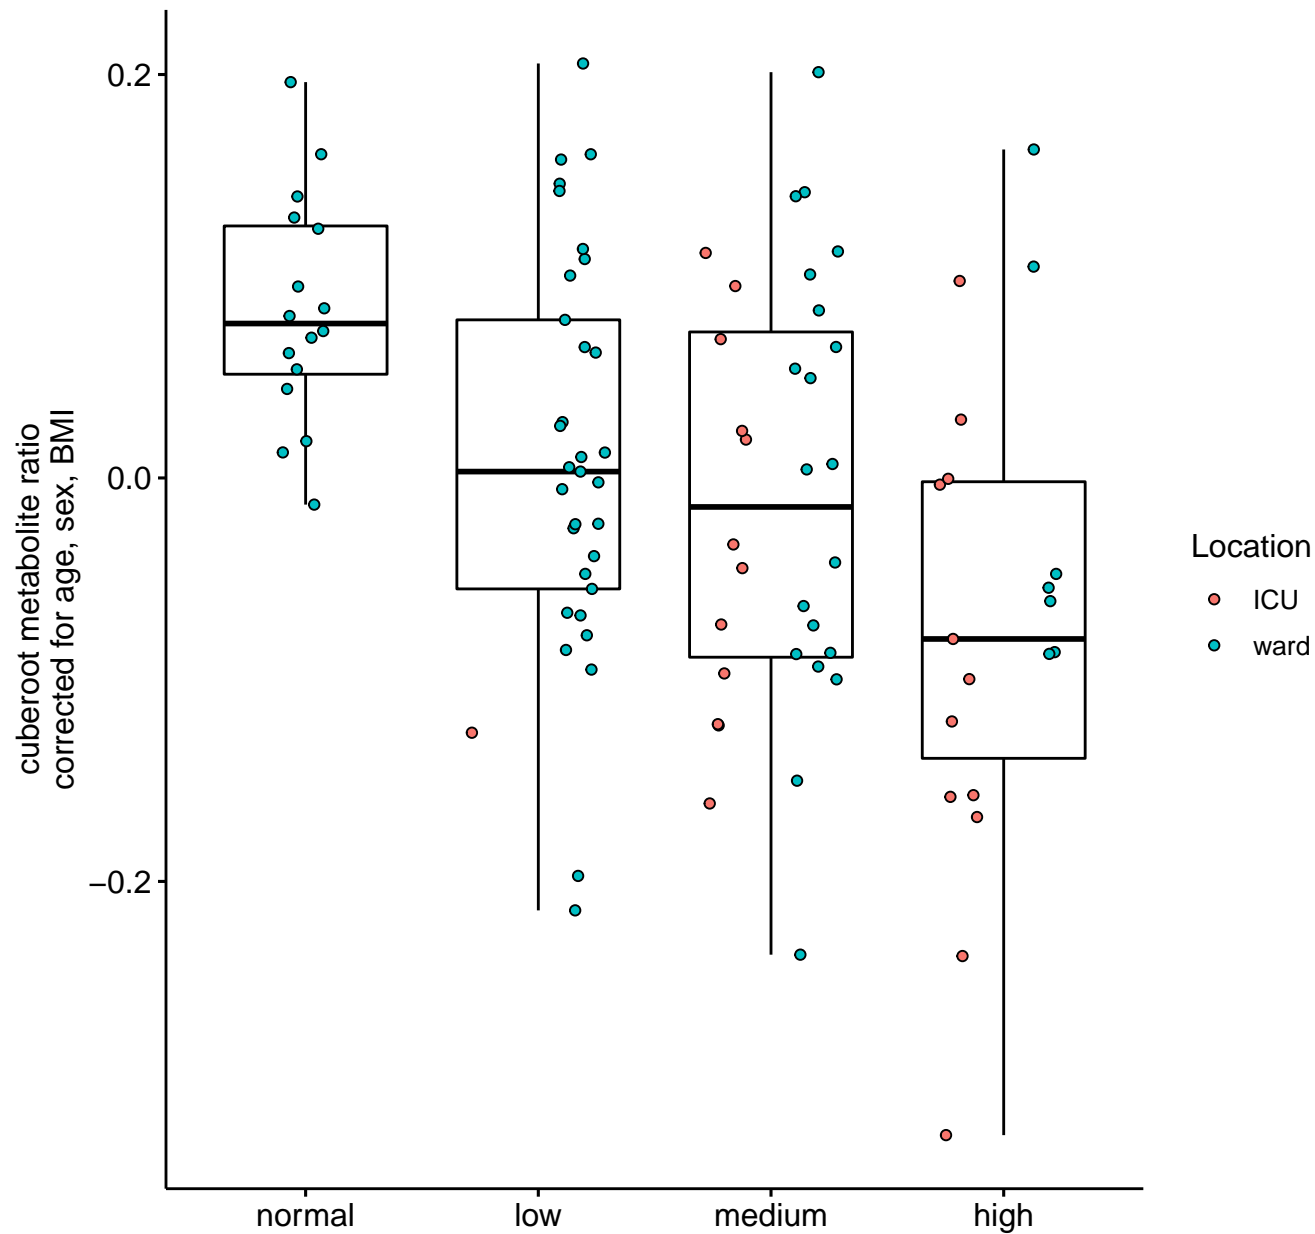

# L.Kynurenine\_amines

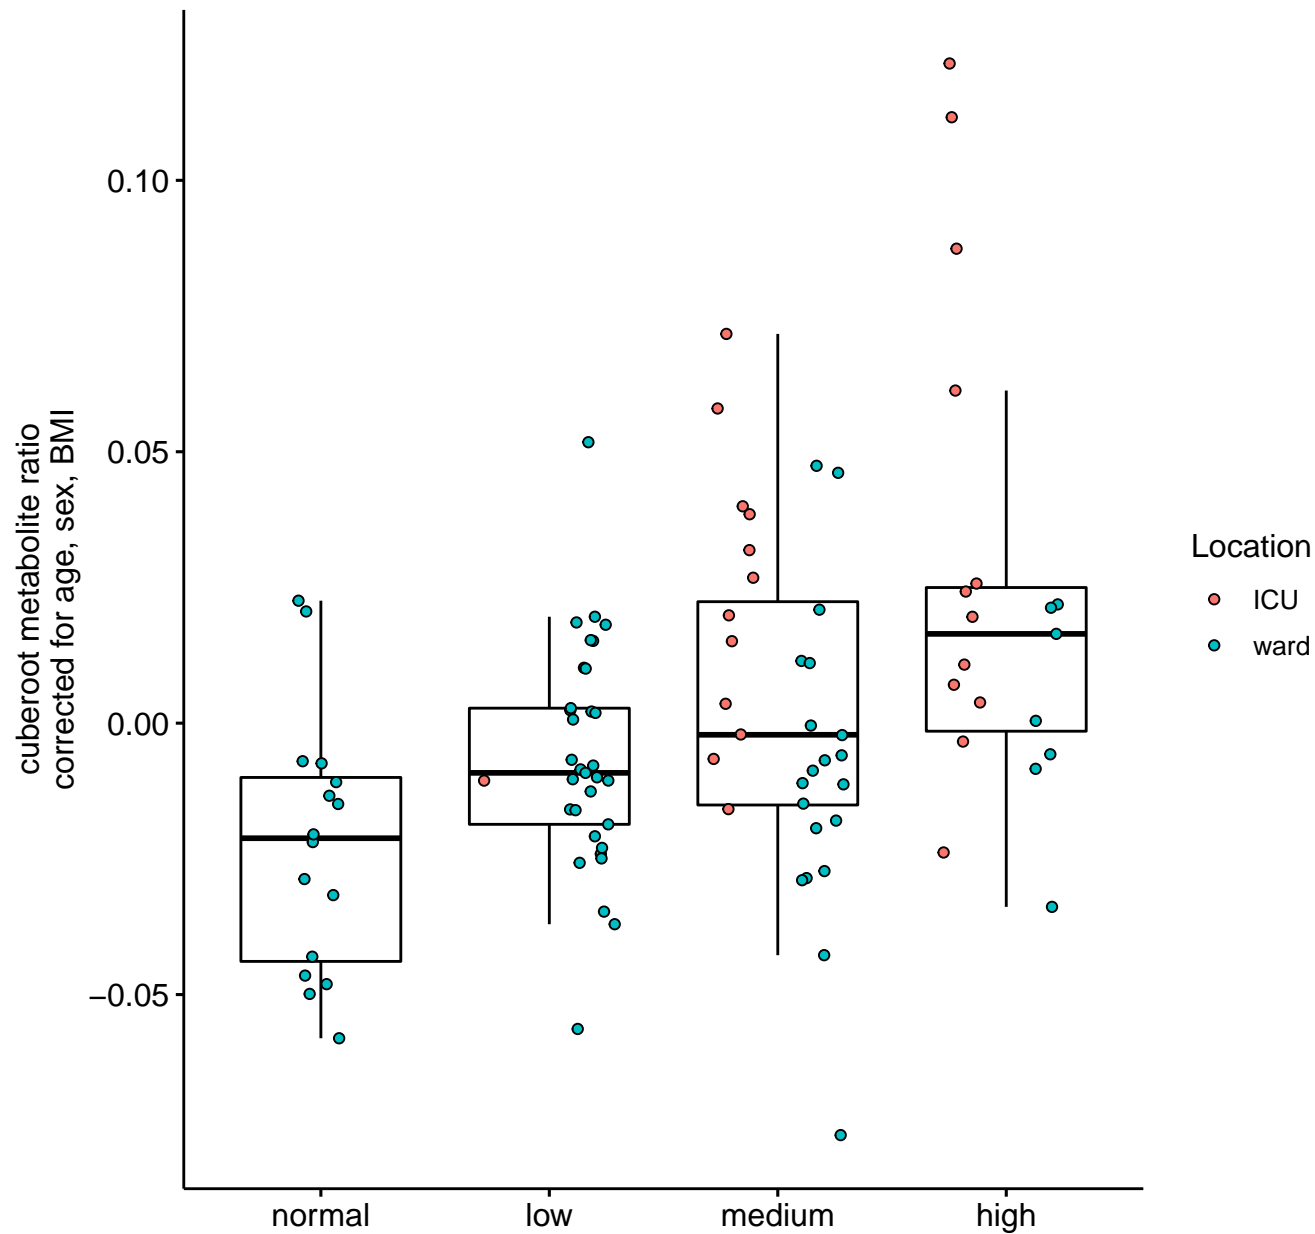

# Serotonine\_amines

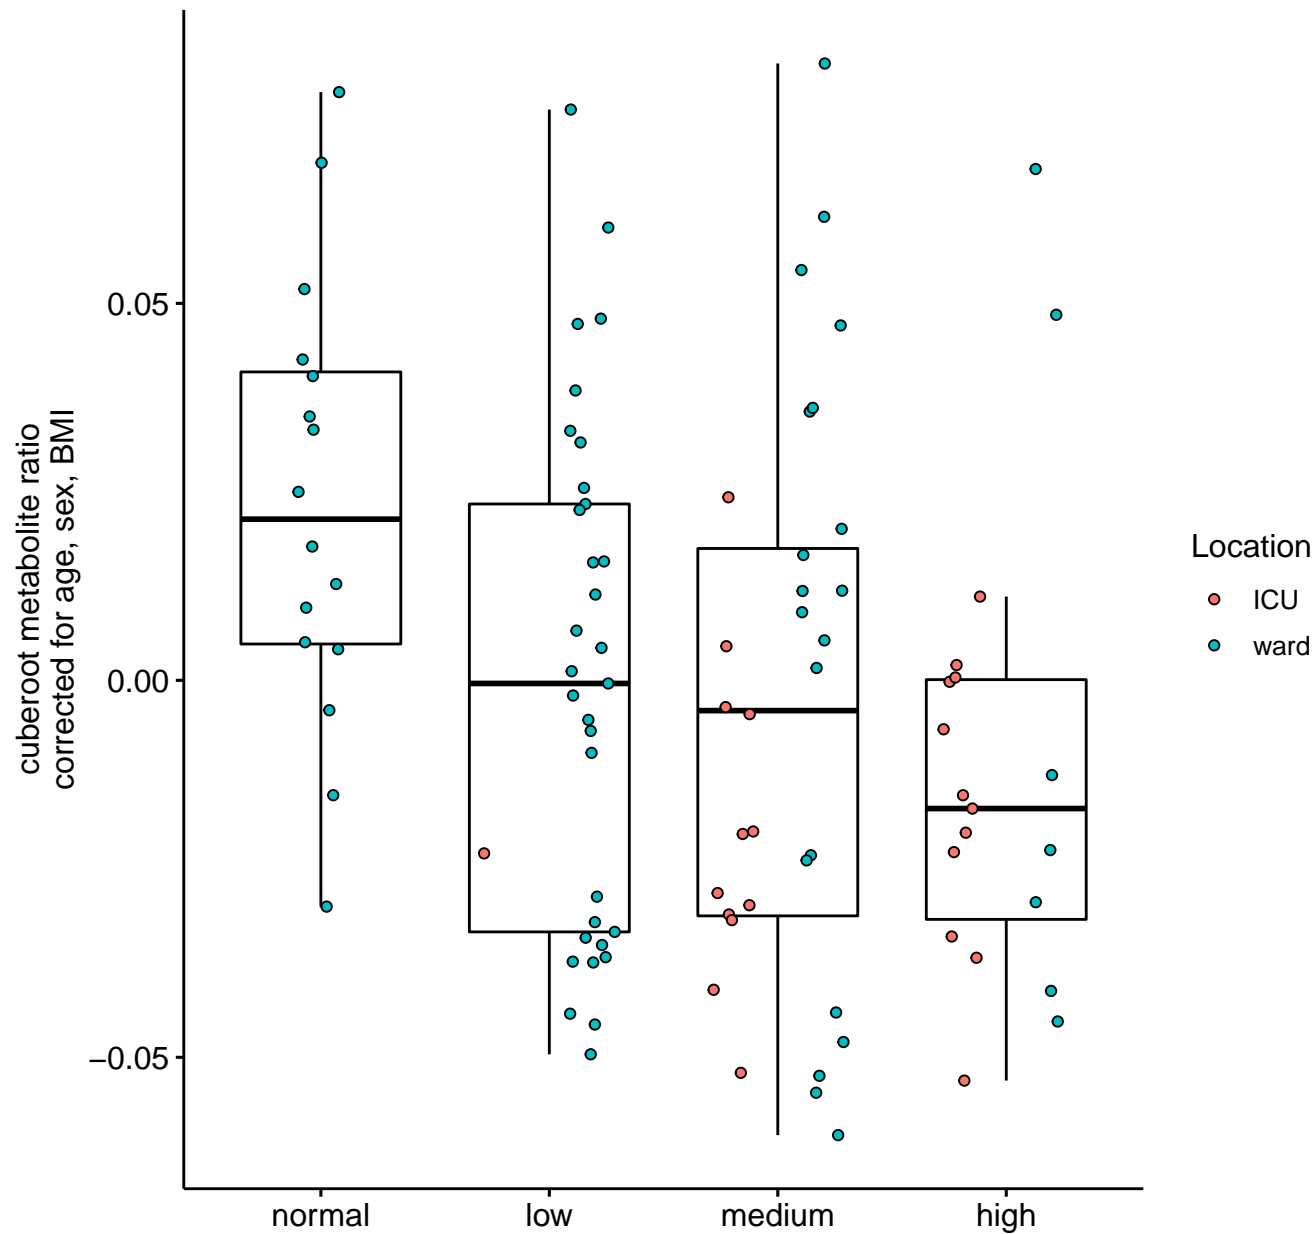

## X4OHLys\_Lys

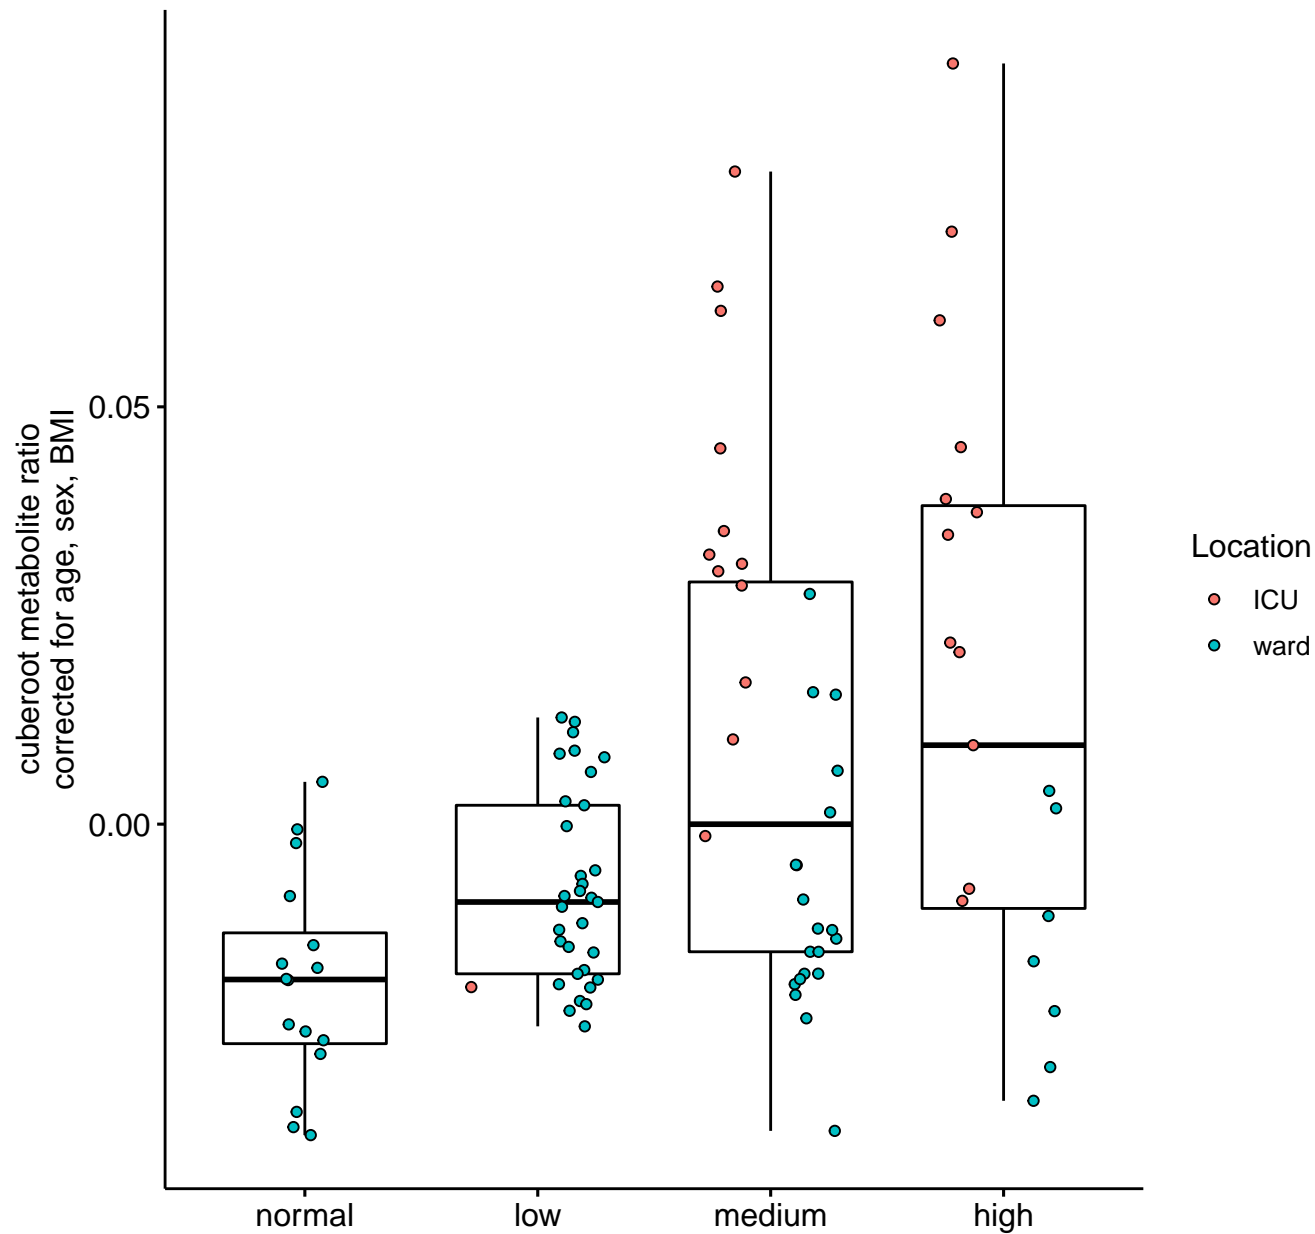



CCL4

cube root metabolite ratio  
corrected for age, sex, BMI

10.0

7.5

5.0

2.5

0.0

normal

low

medium

high

Location

ICU

ward

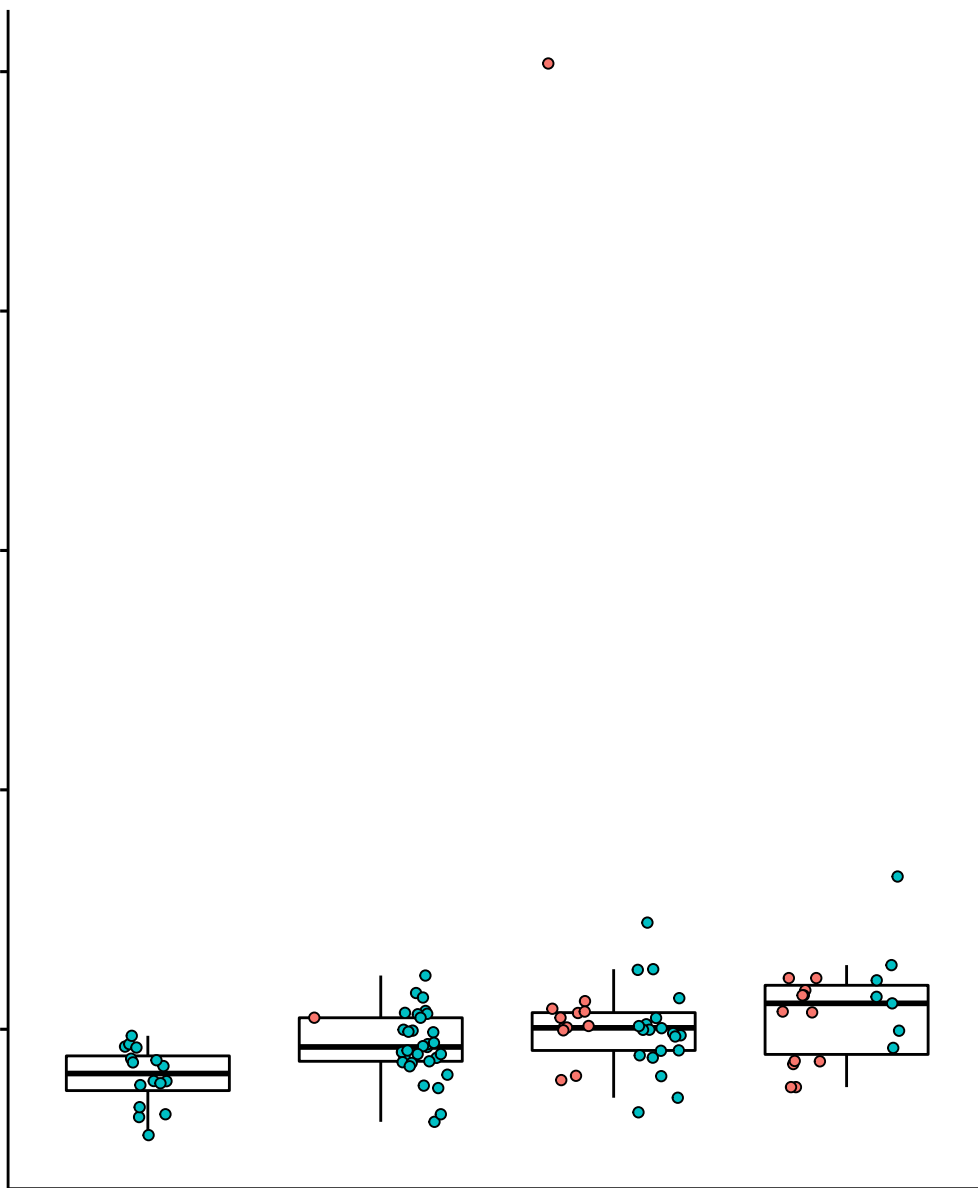

CCL2

cube root metabolite ratio  
corrected for age, sex, BMI

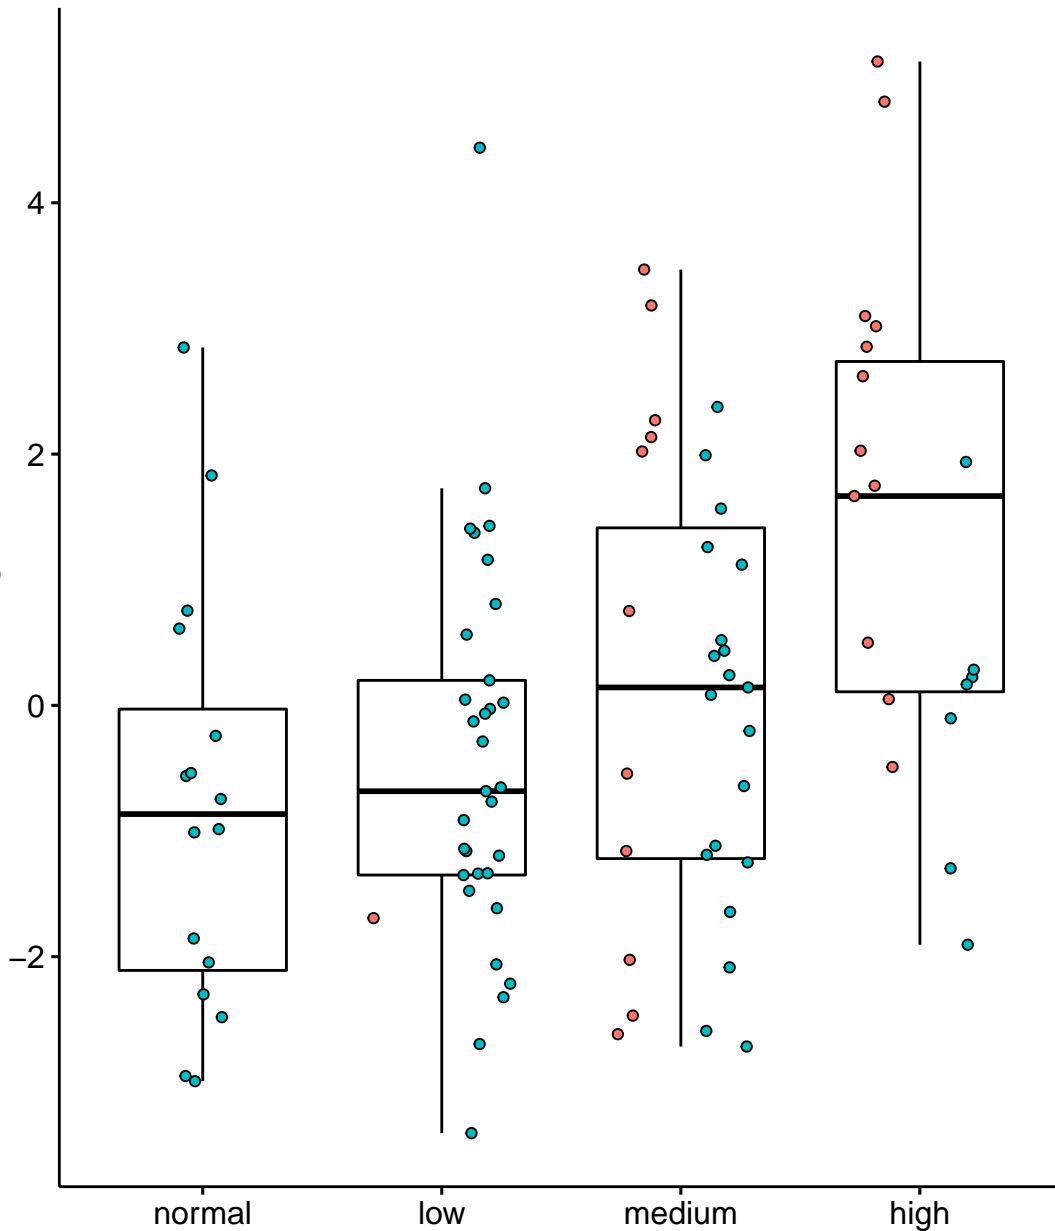

Location

ICU  
ward

# L.Tryptophan\_amines

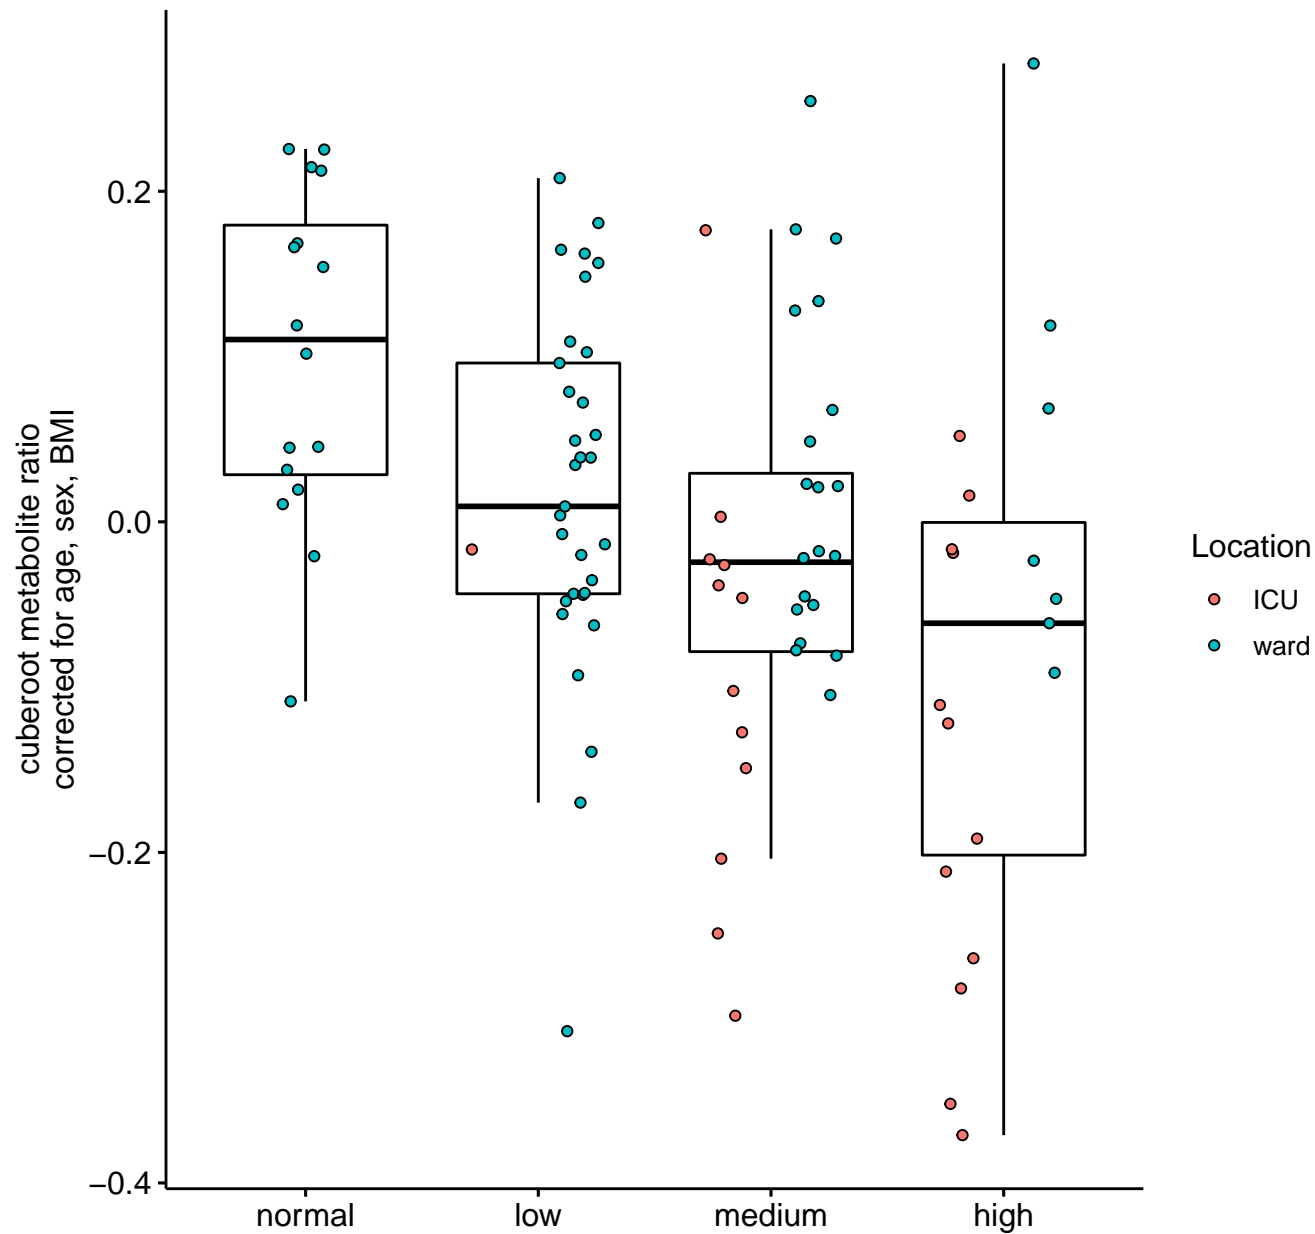

# L.Alanine\_amines

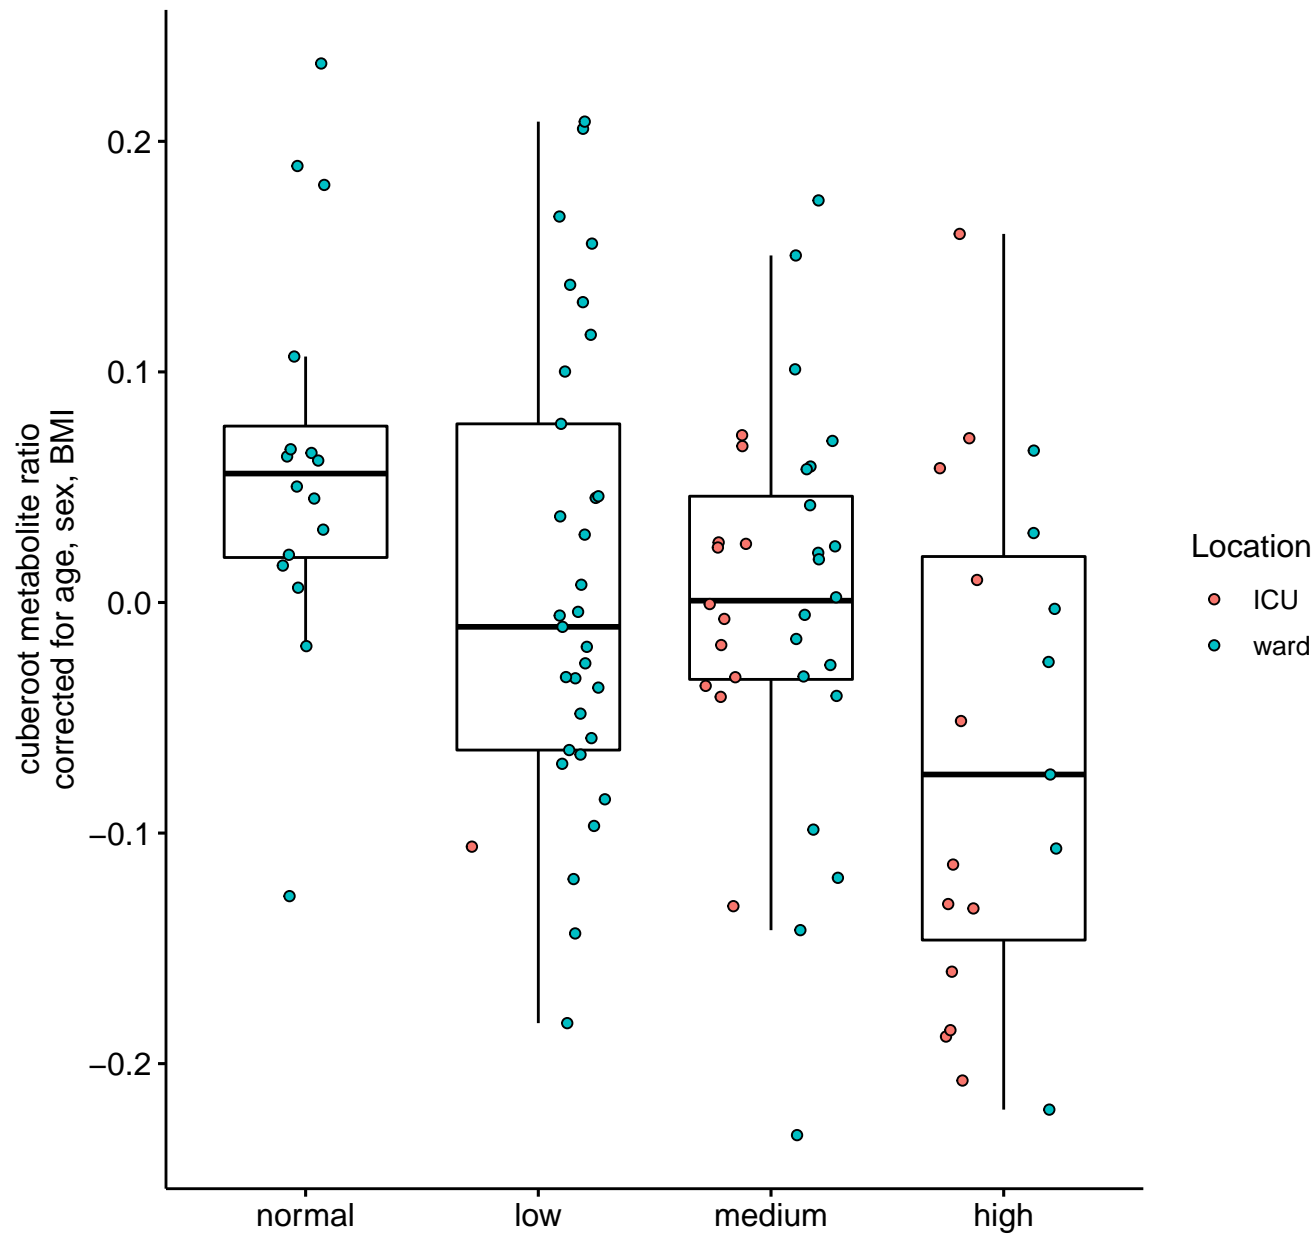

# L.Phenylalanine\_amines

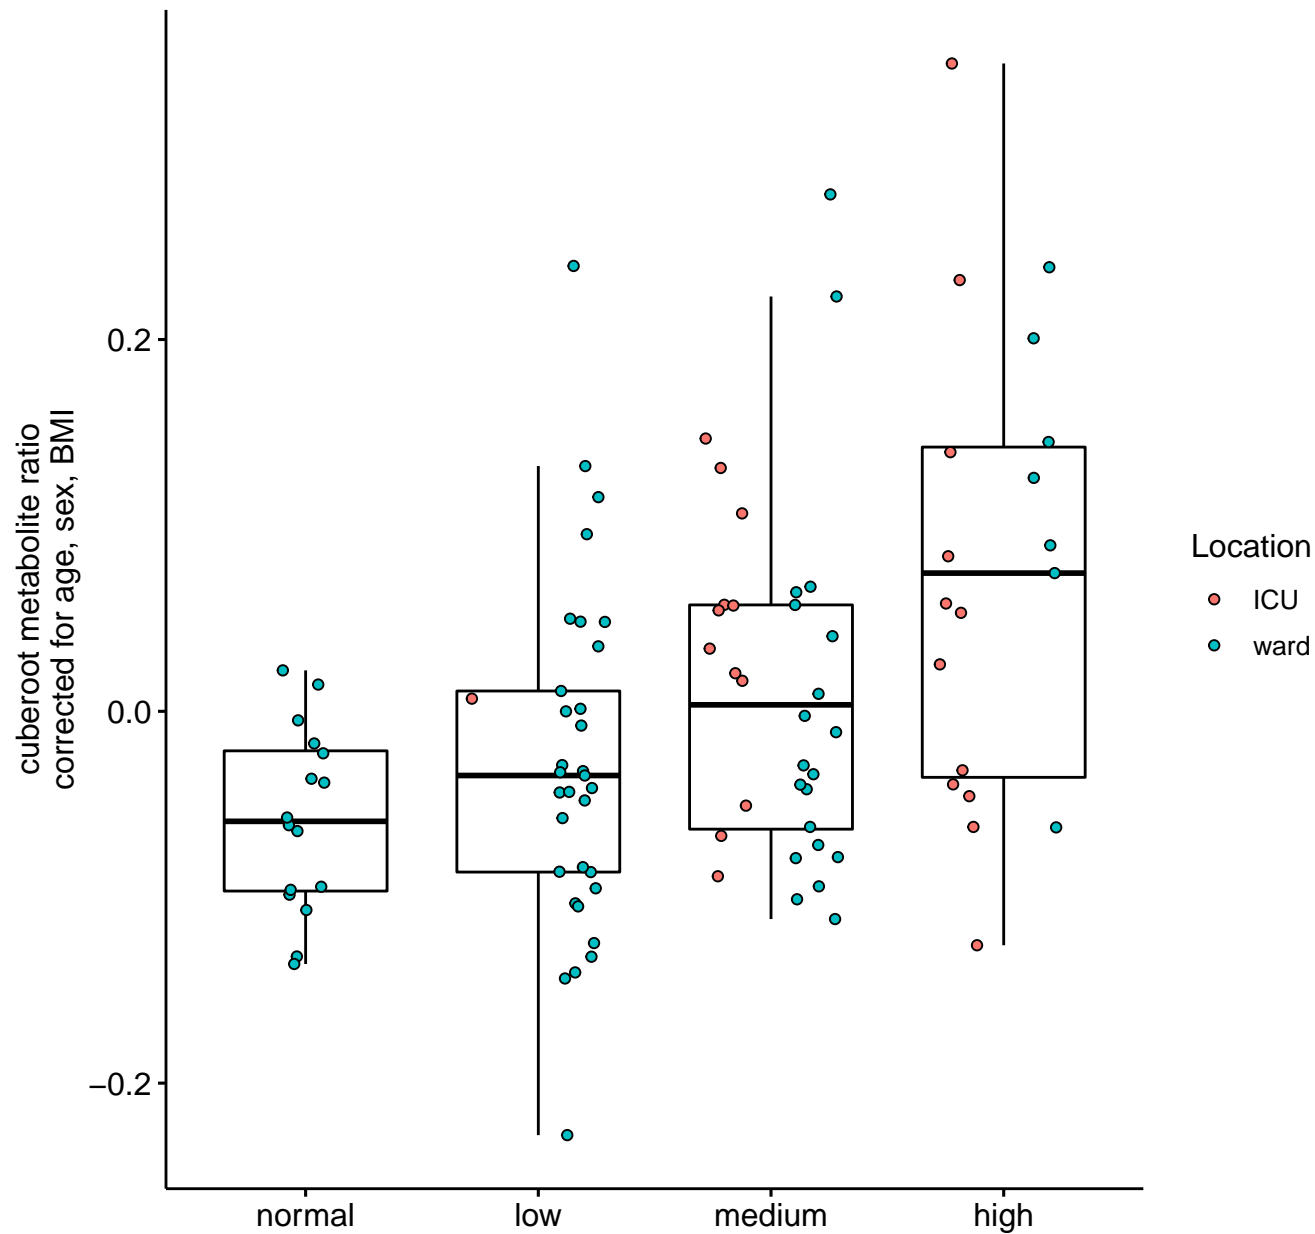

# Anserine\_amines\_wc

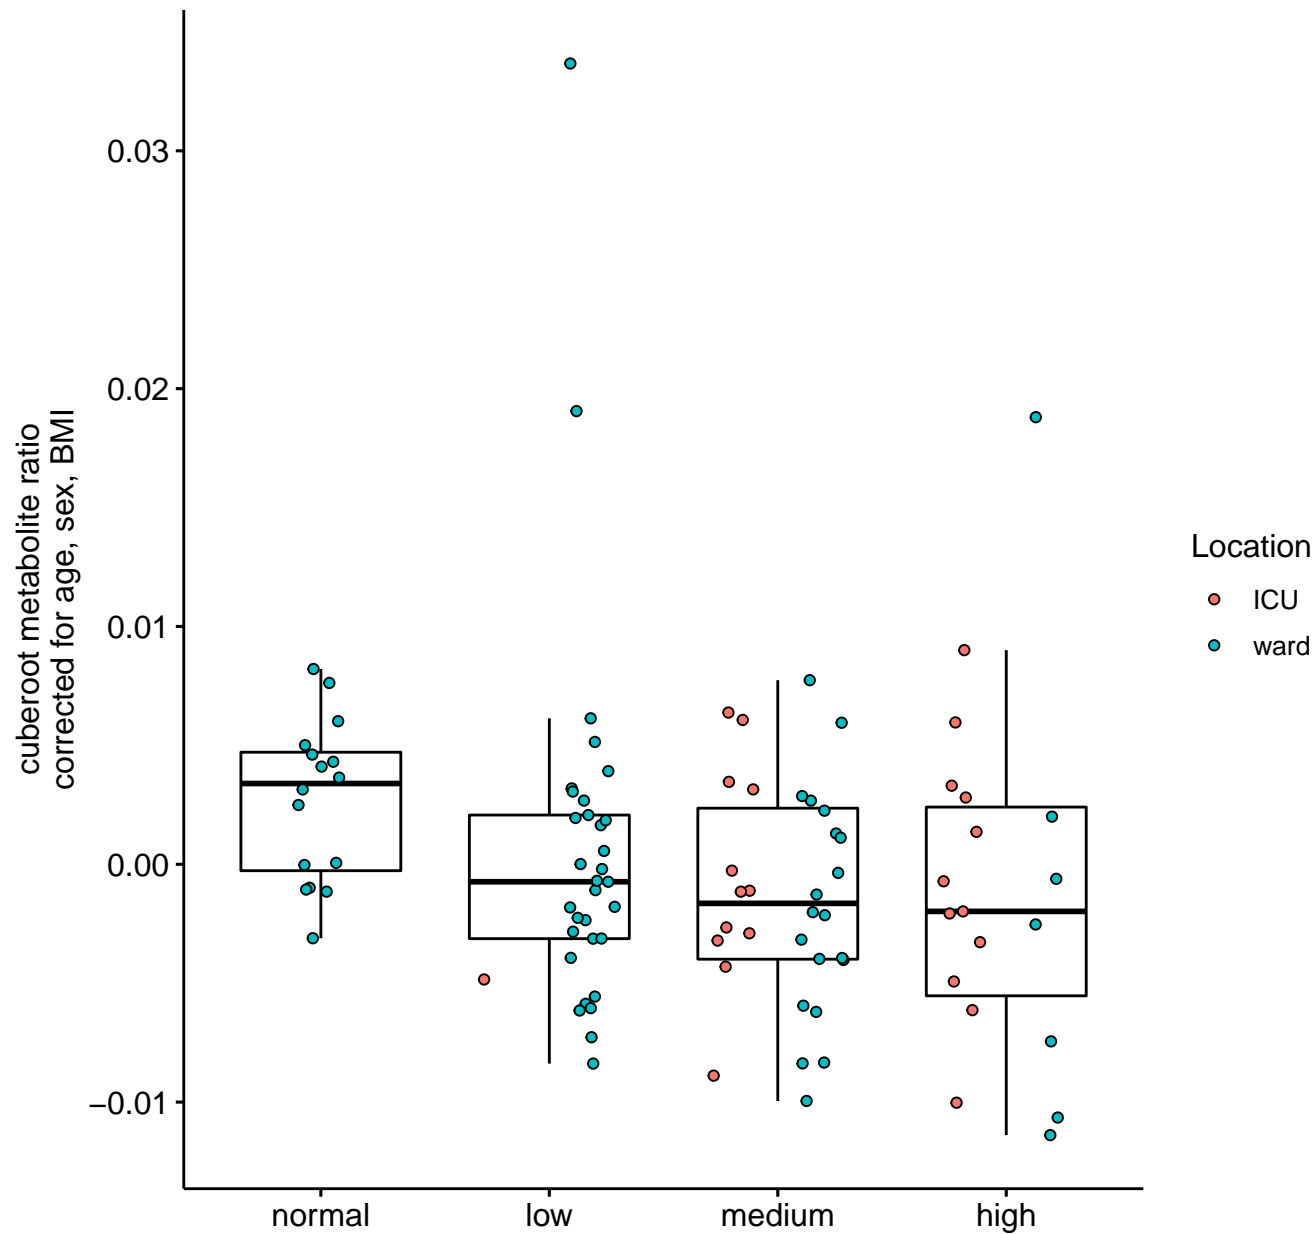

CD163

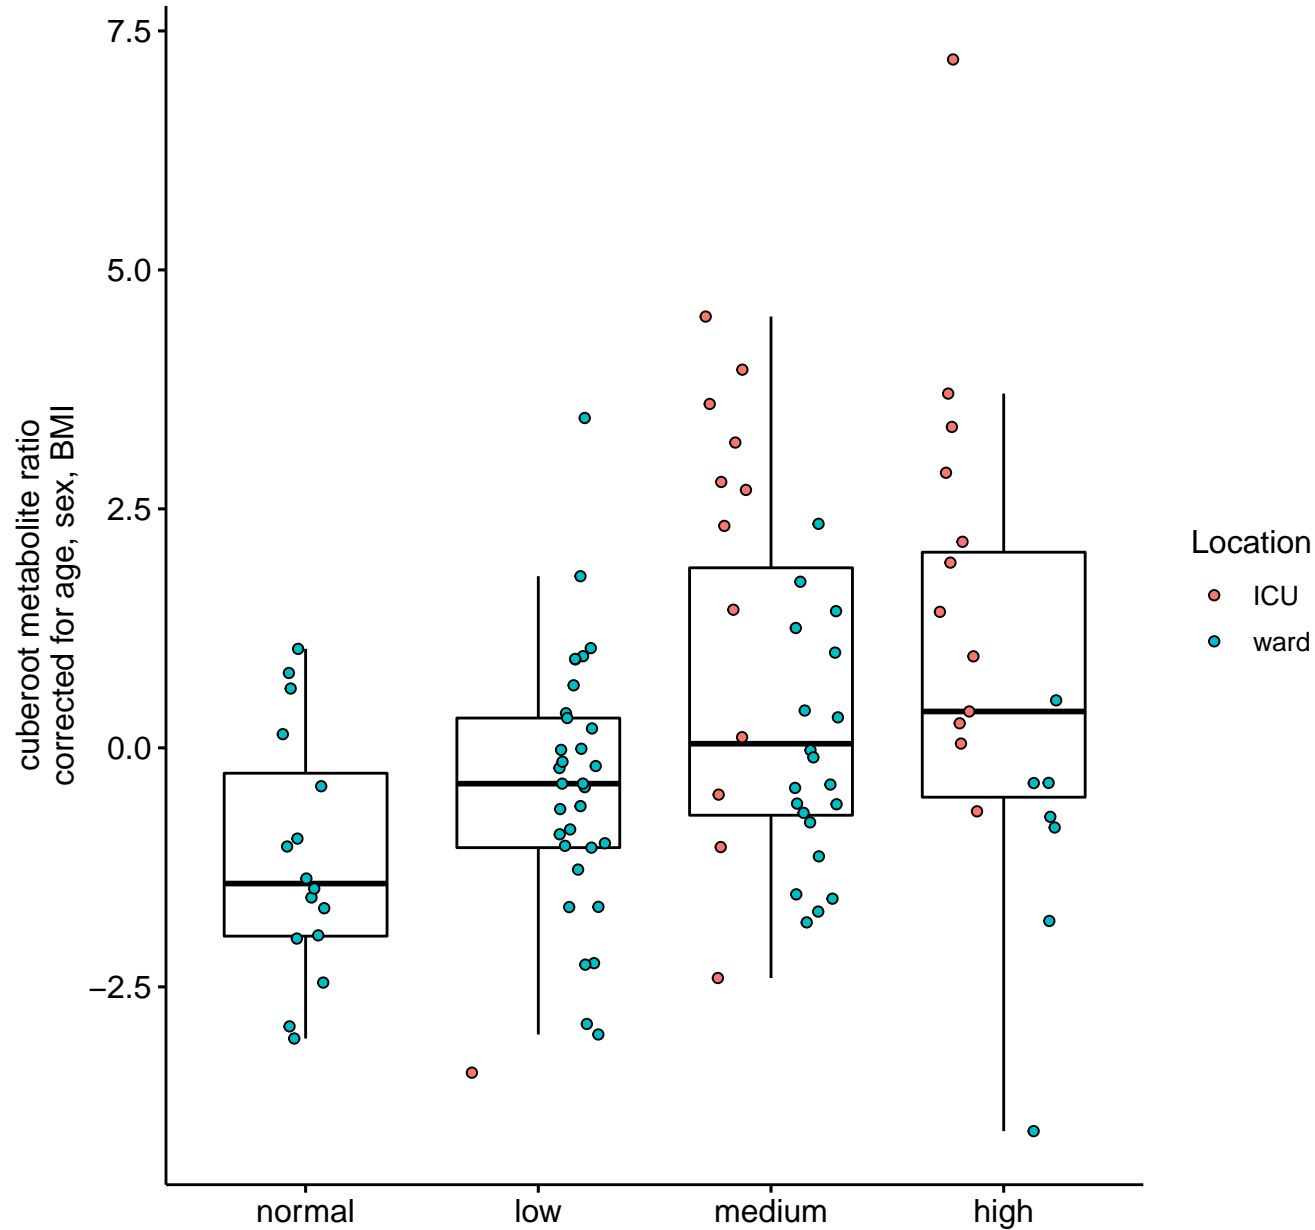

# Neutrophils

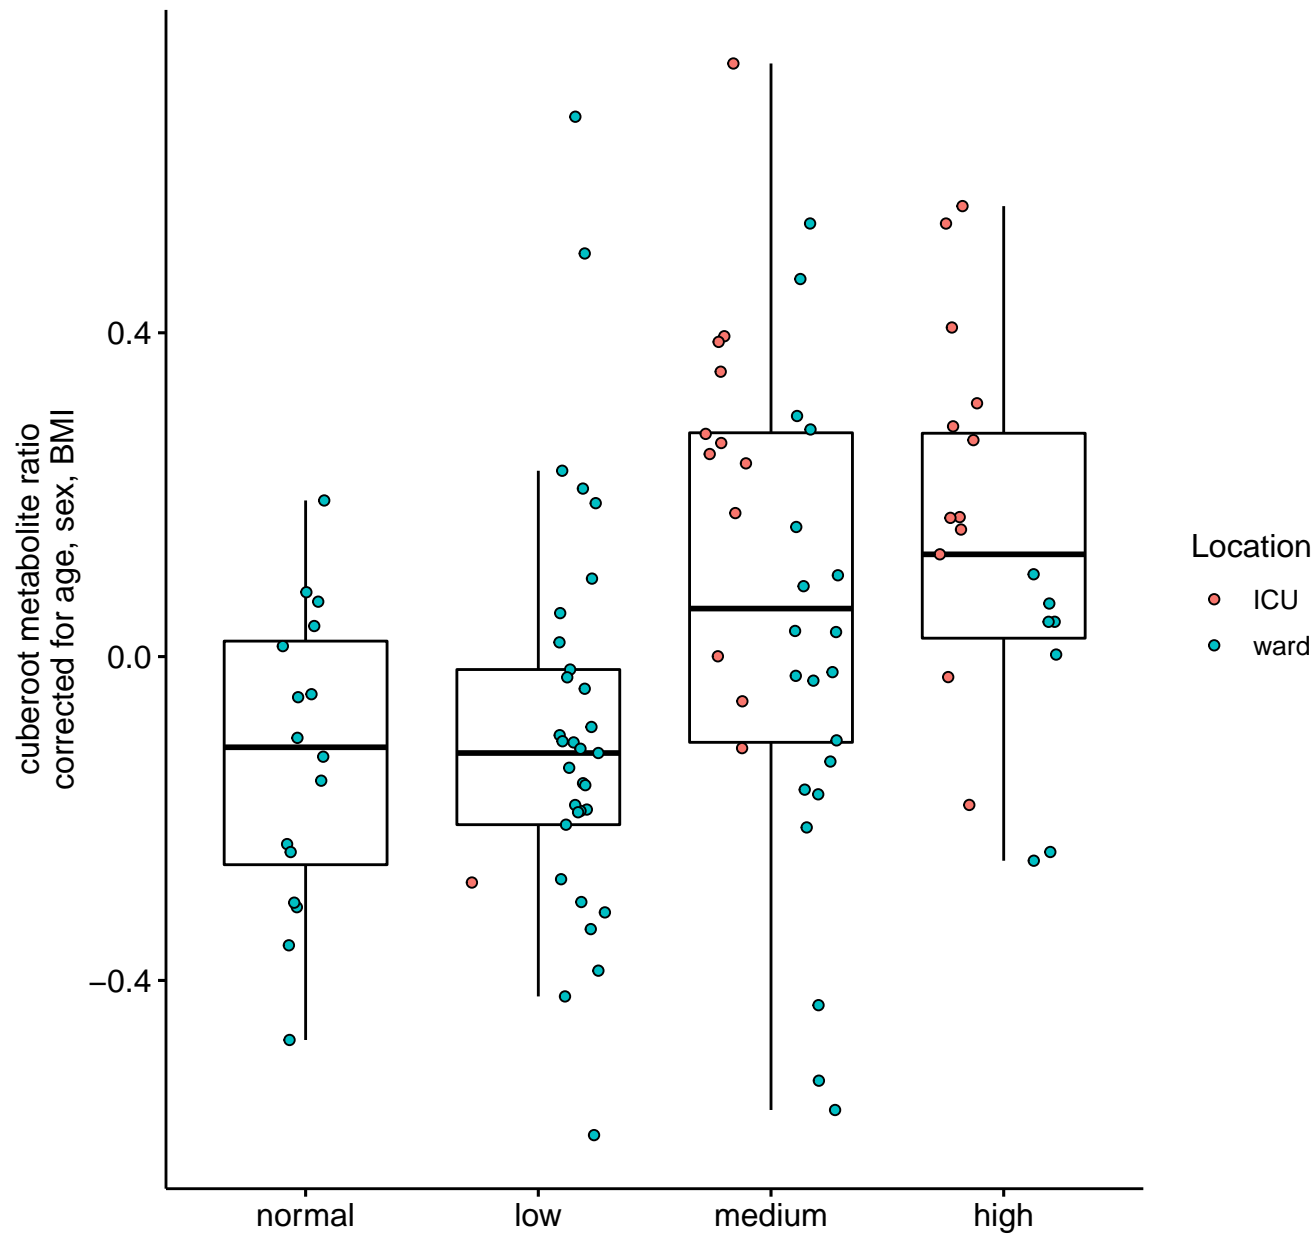



# L.4.hydroxy.proline\_amines

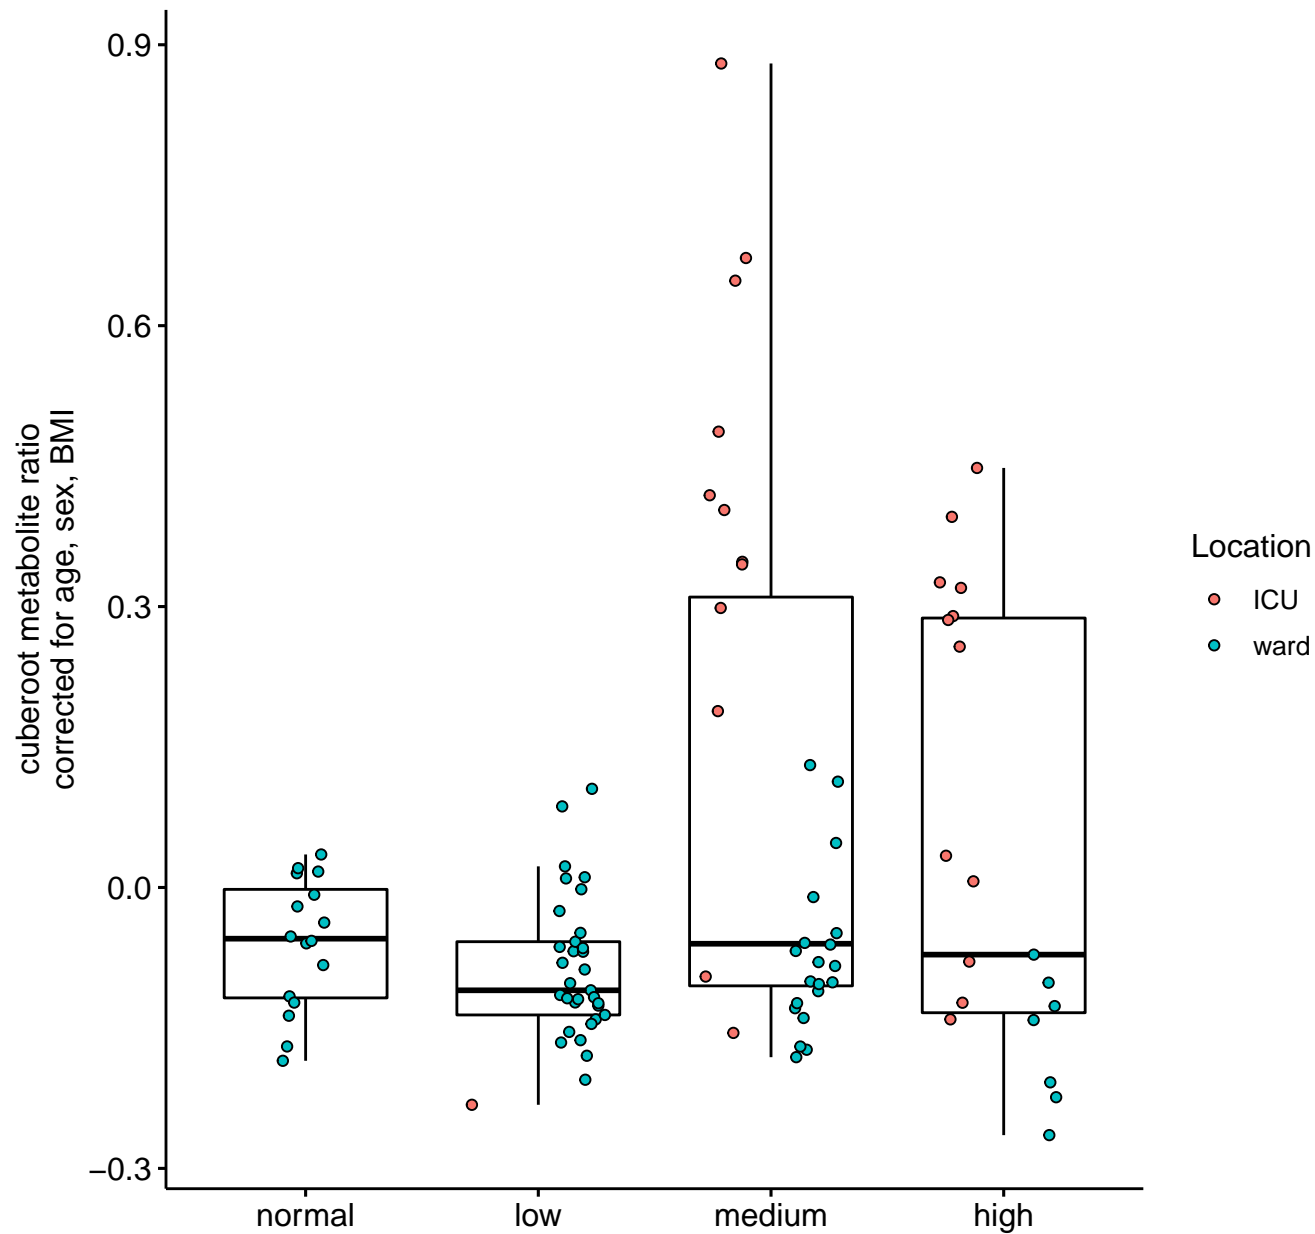

# X4OHPro\_Pro

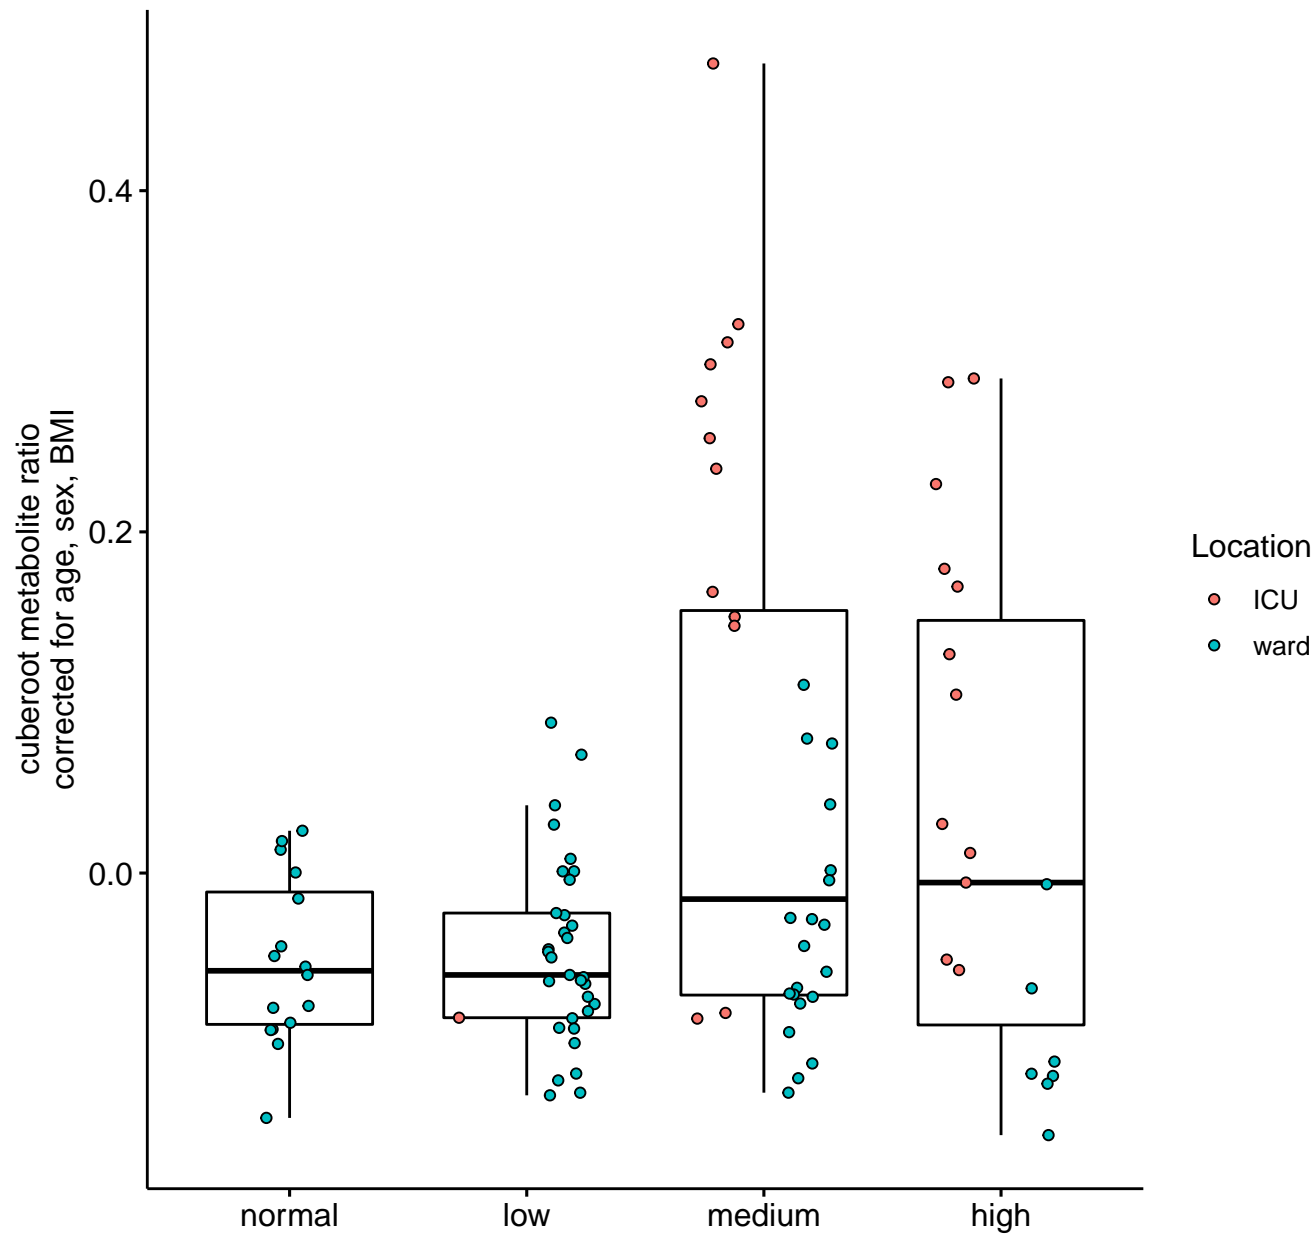

# Cystathionine\_amines

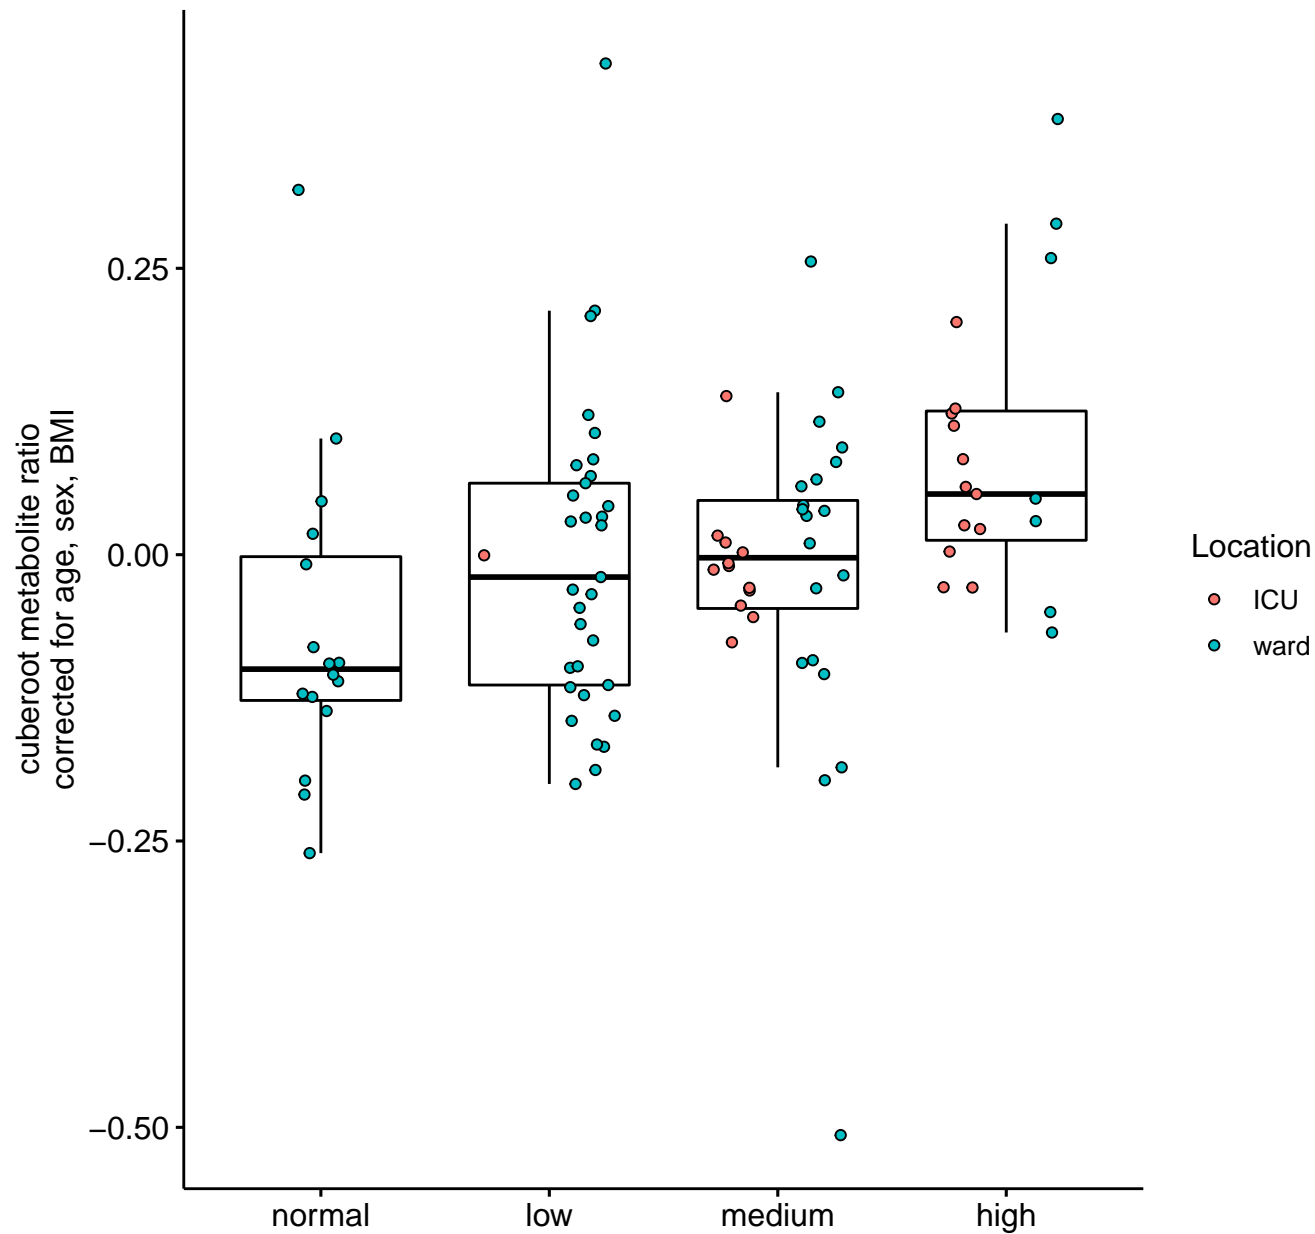

# Gamma.aminobutyric.acid\_amines\_wc

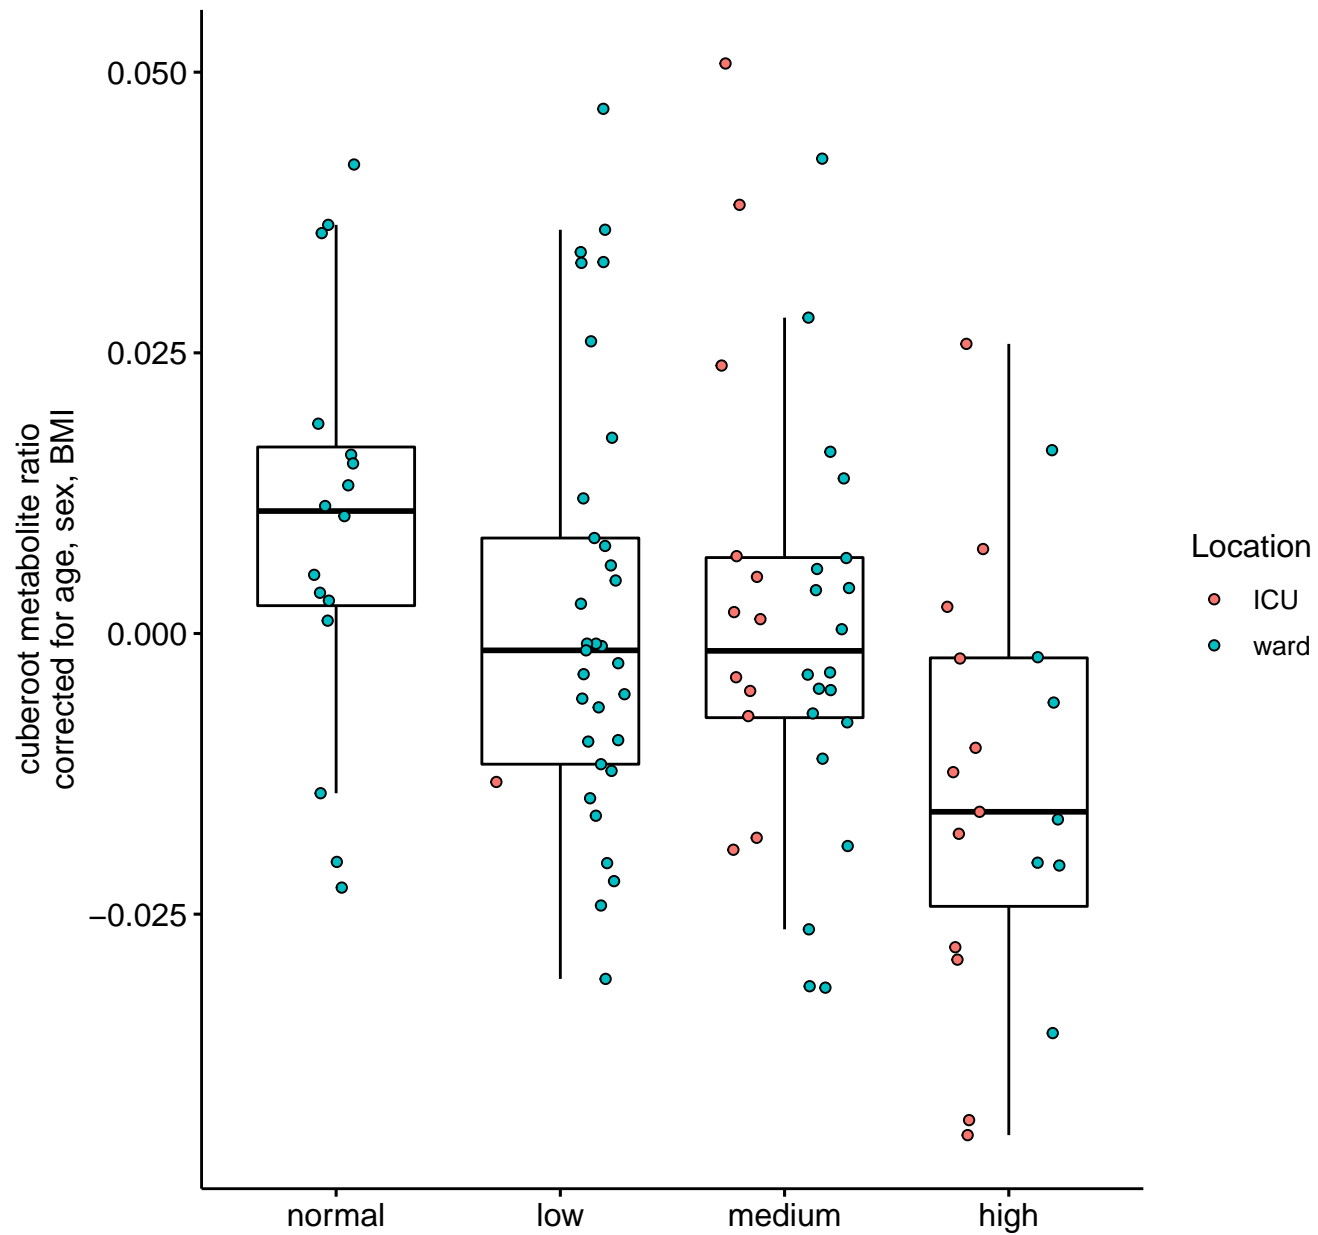

sIL2R

cuberoor metabolite ratio  
corrected for age, sex, BMI

10  
5  
0  
-5

normal

low

medium

high

Location

ICU  
ward

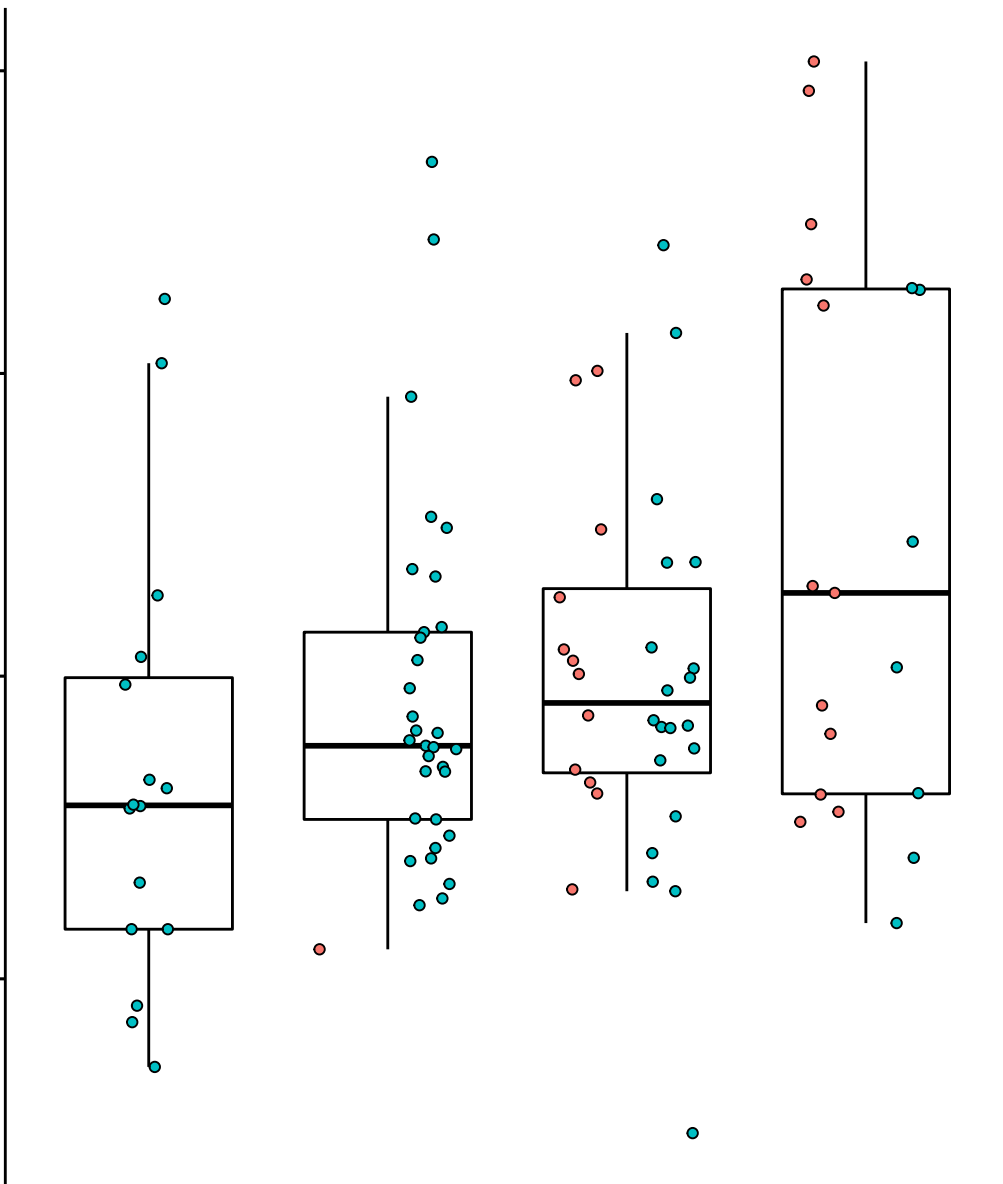

# Citrulline\_amines

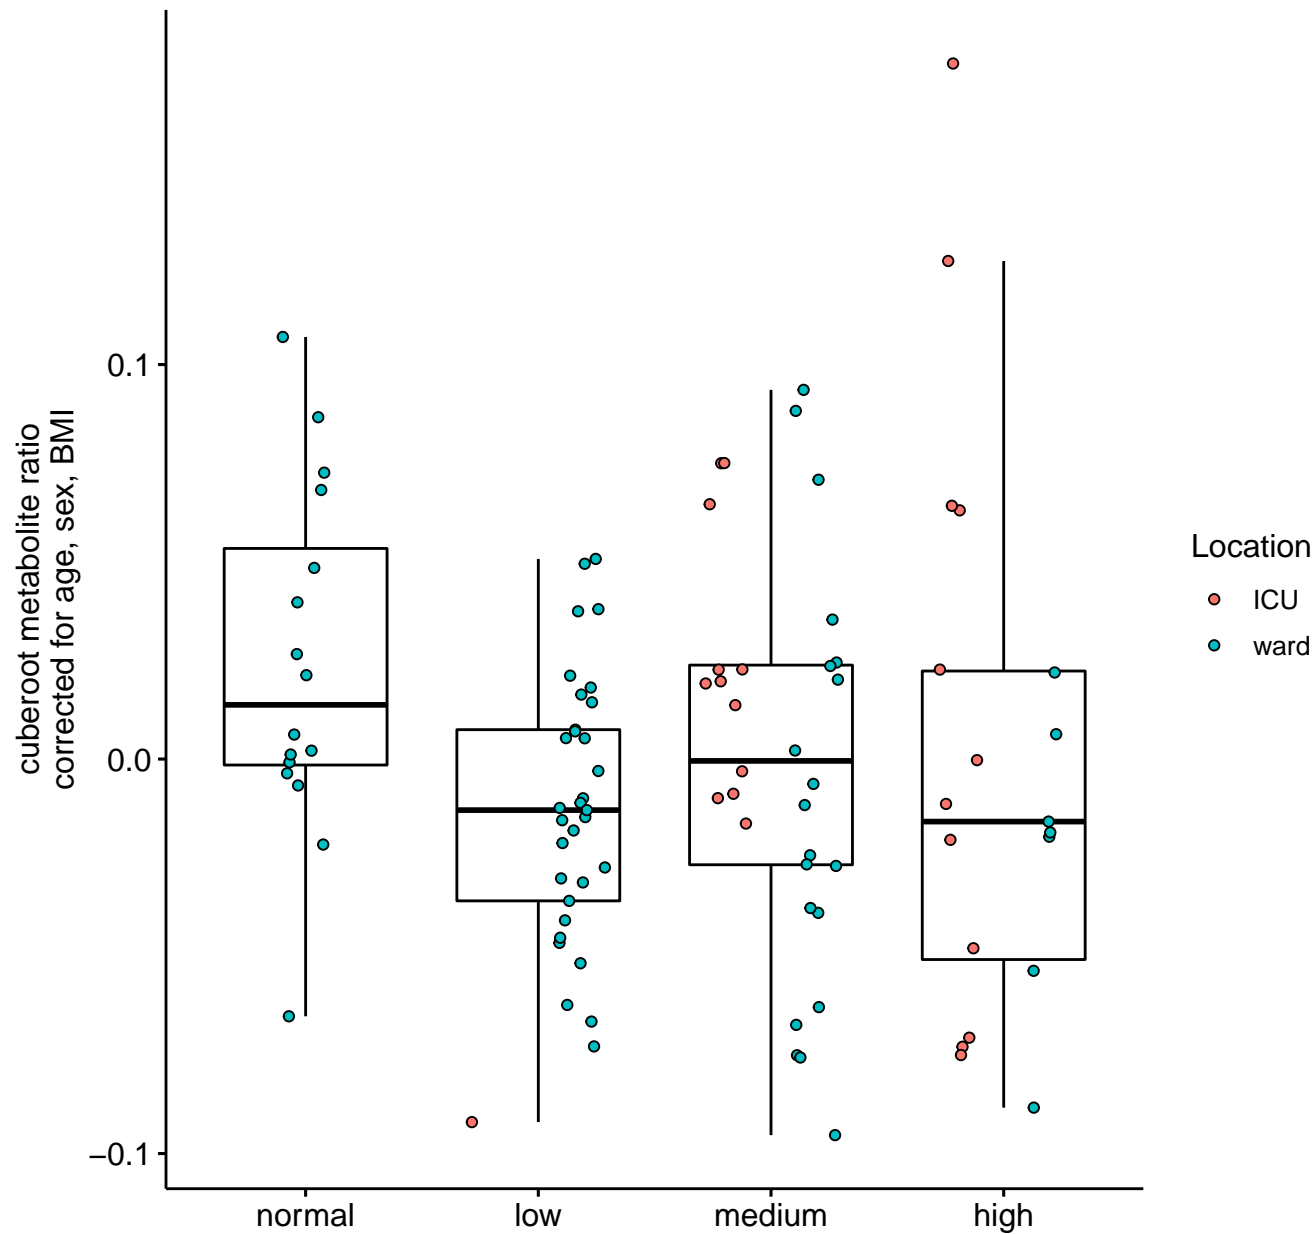

CD8

cube root metabolite ratio  
corrected for age, sex, BMI

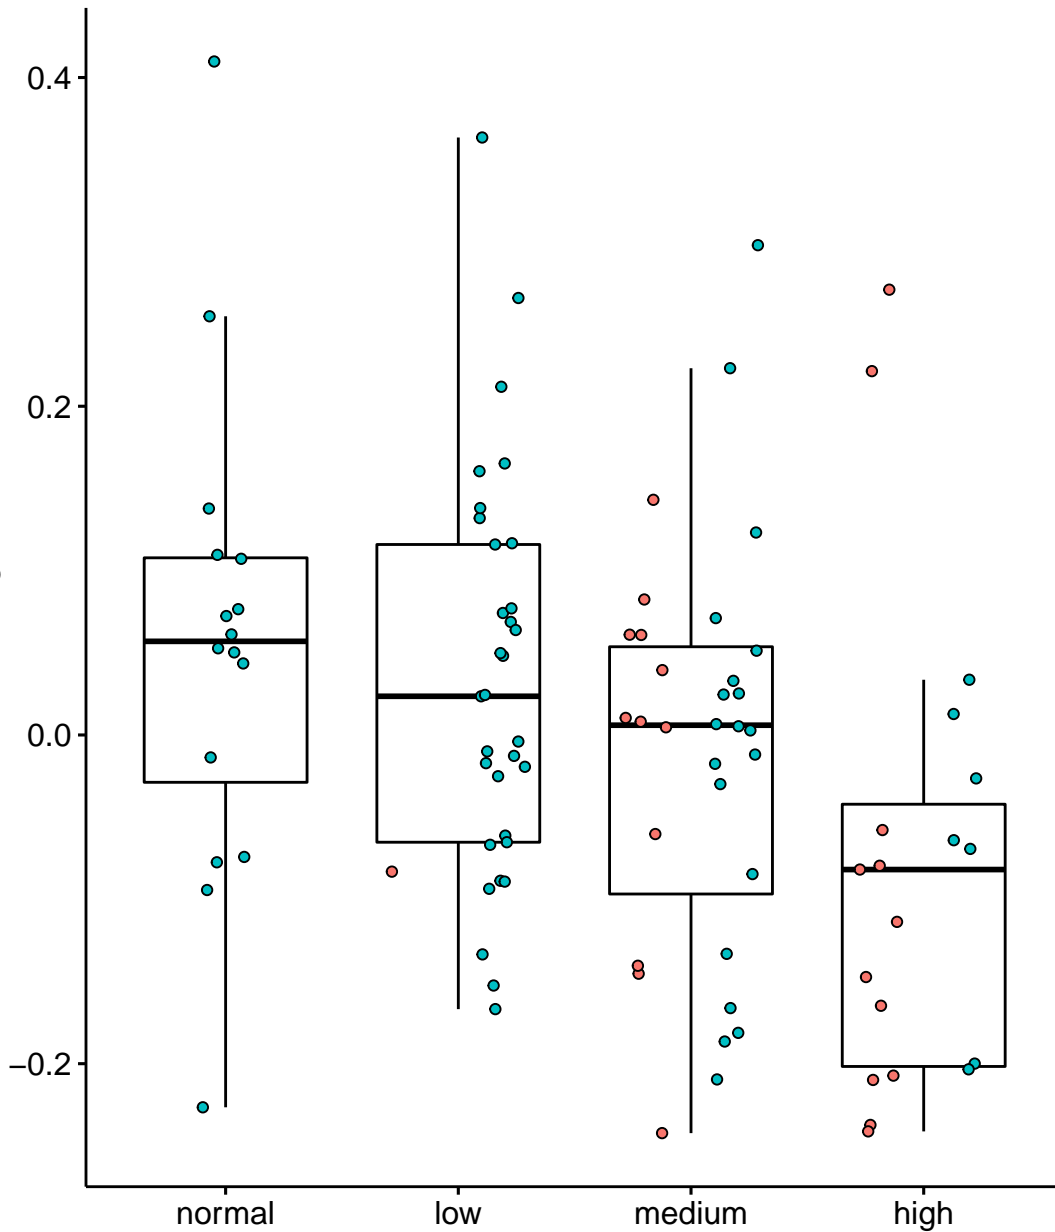

Location

ICU  
ward

# Lymphocytes

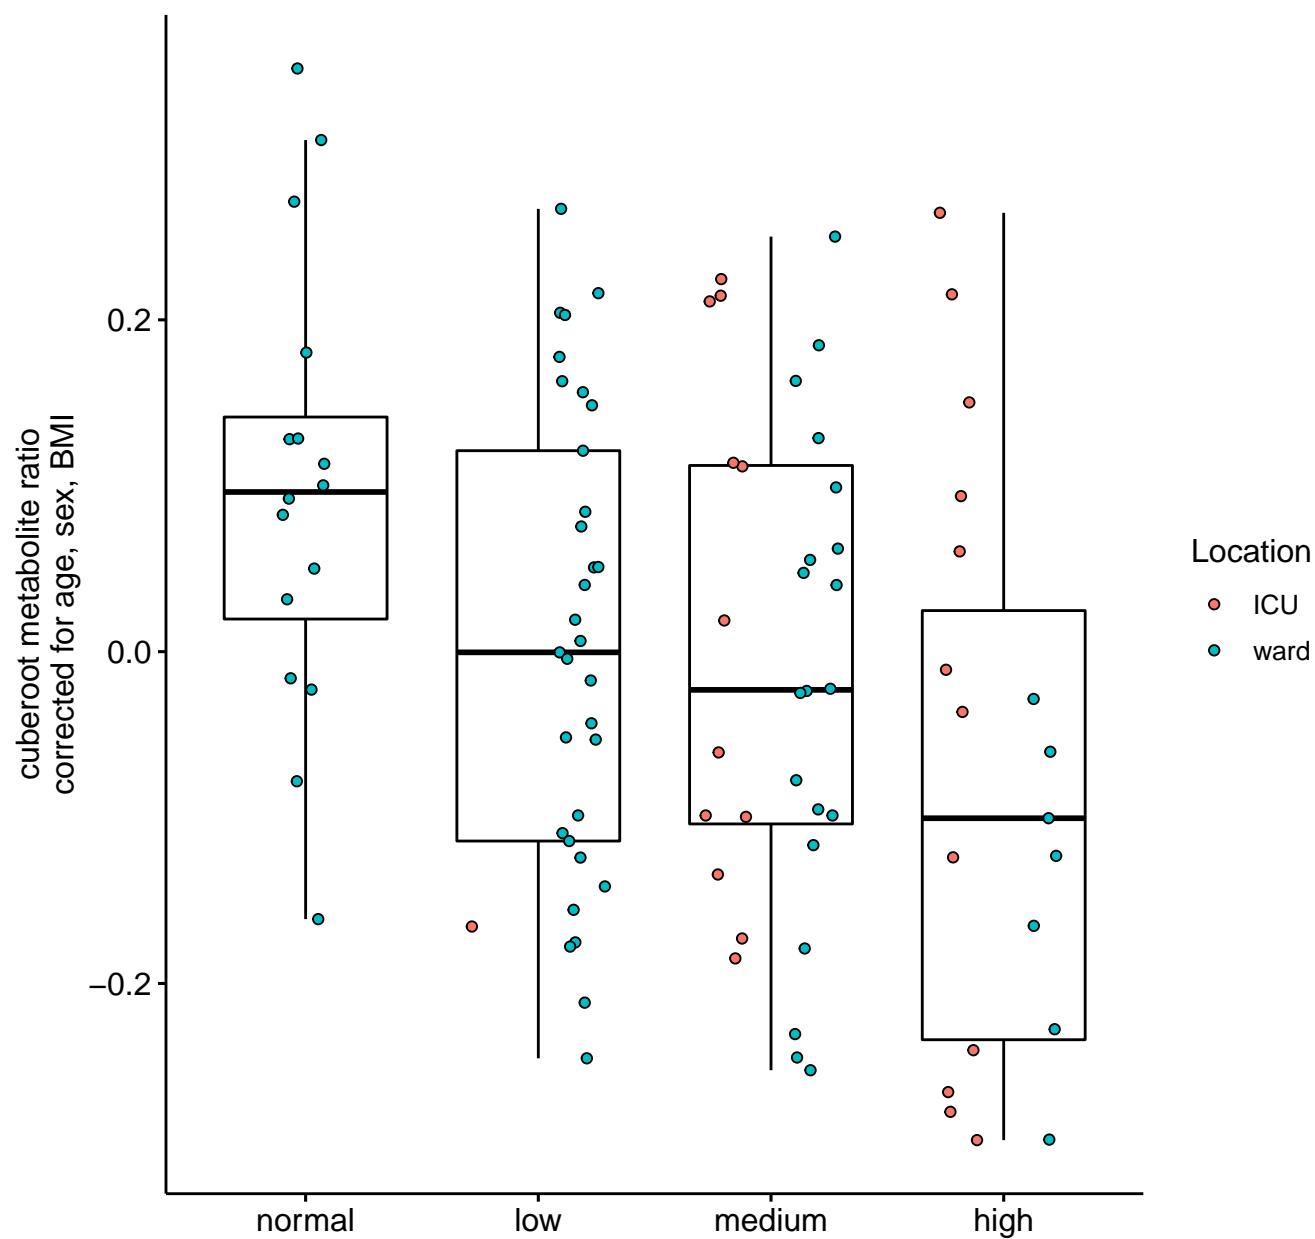



# L.Asparagine\_amines

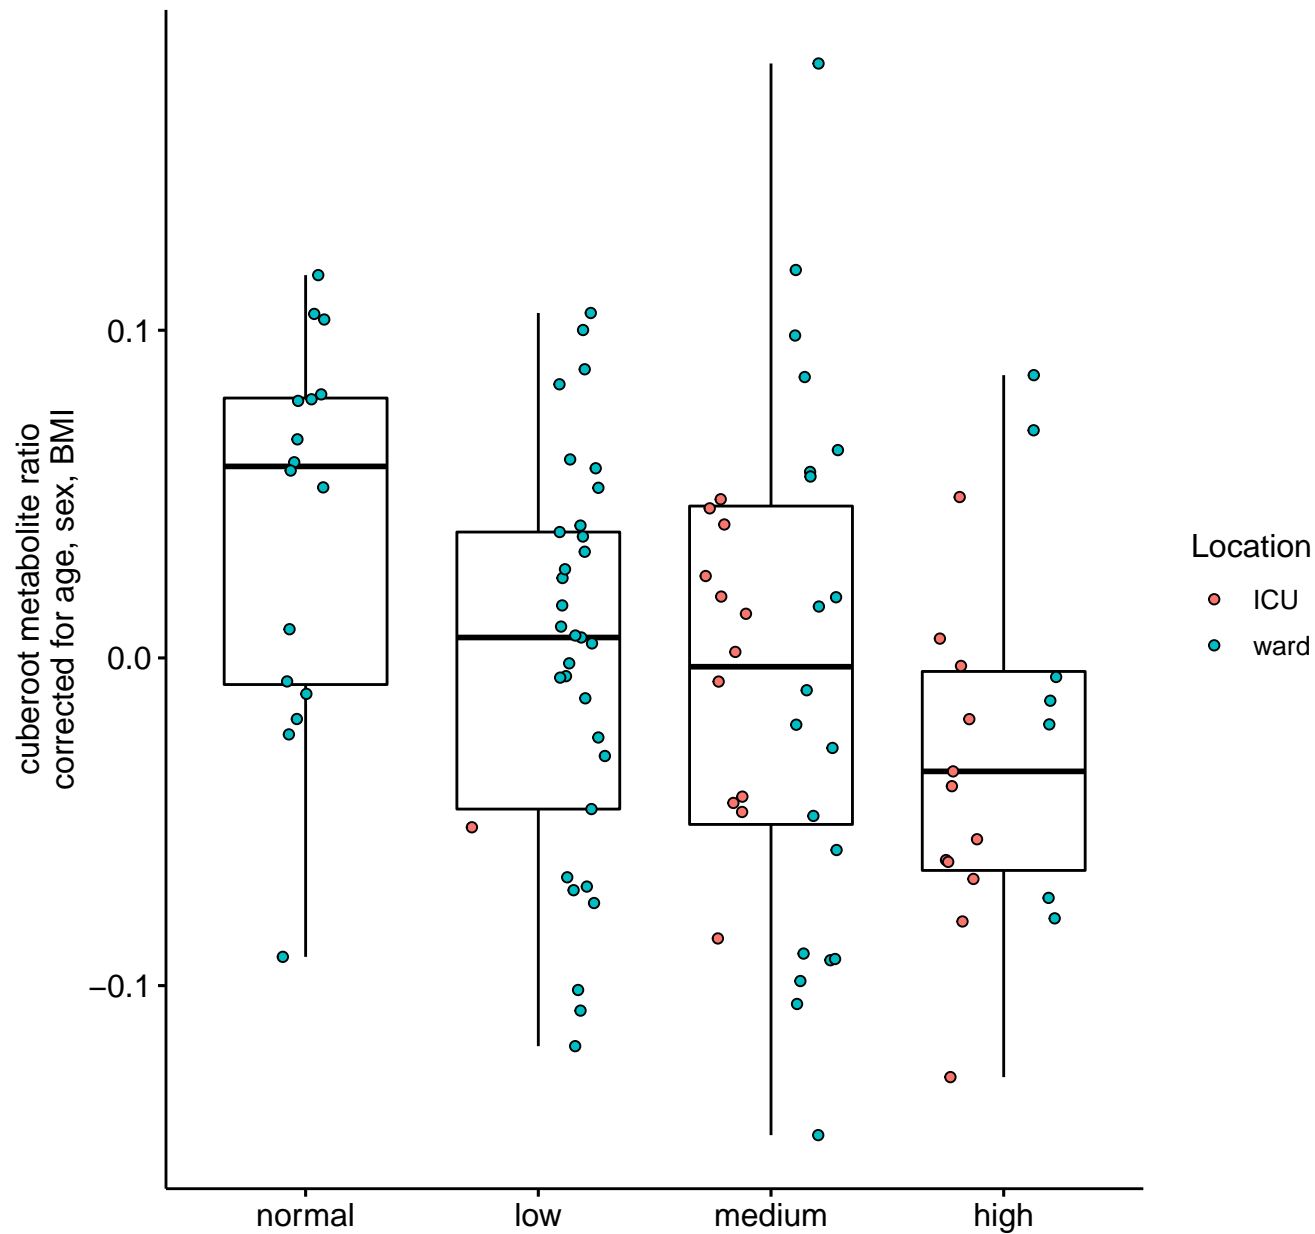

# Gamma.Glutamylglutamine\_amines

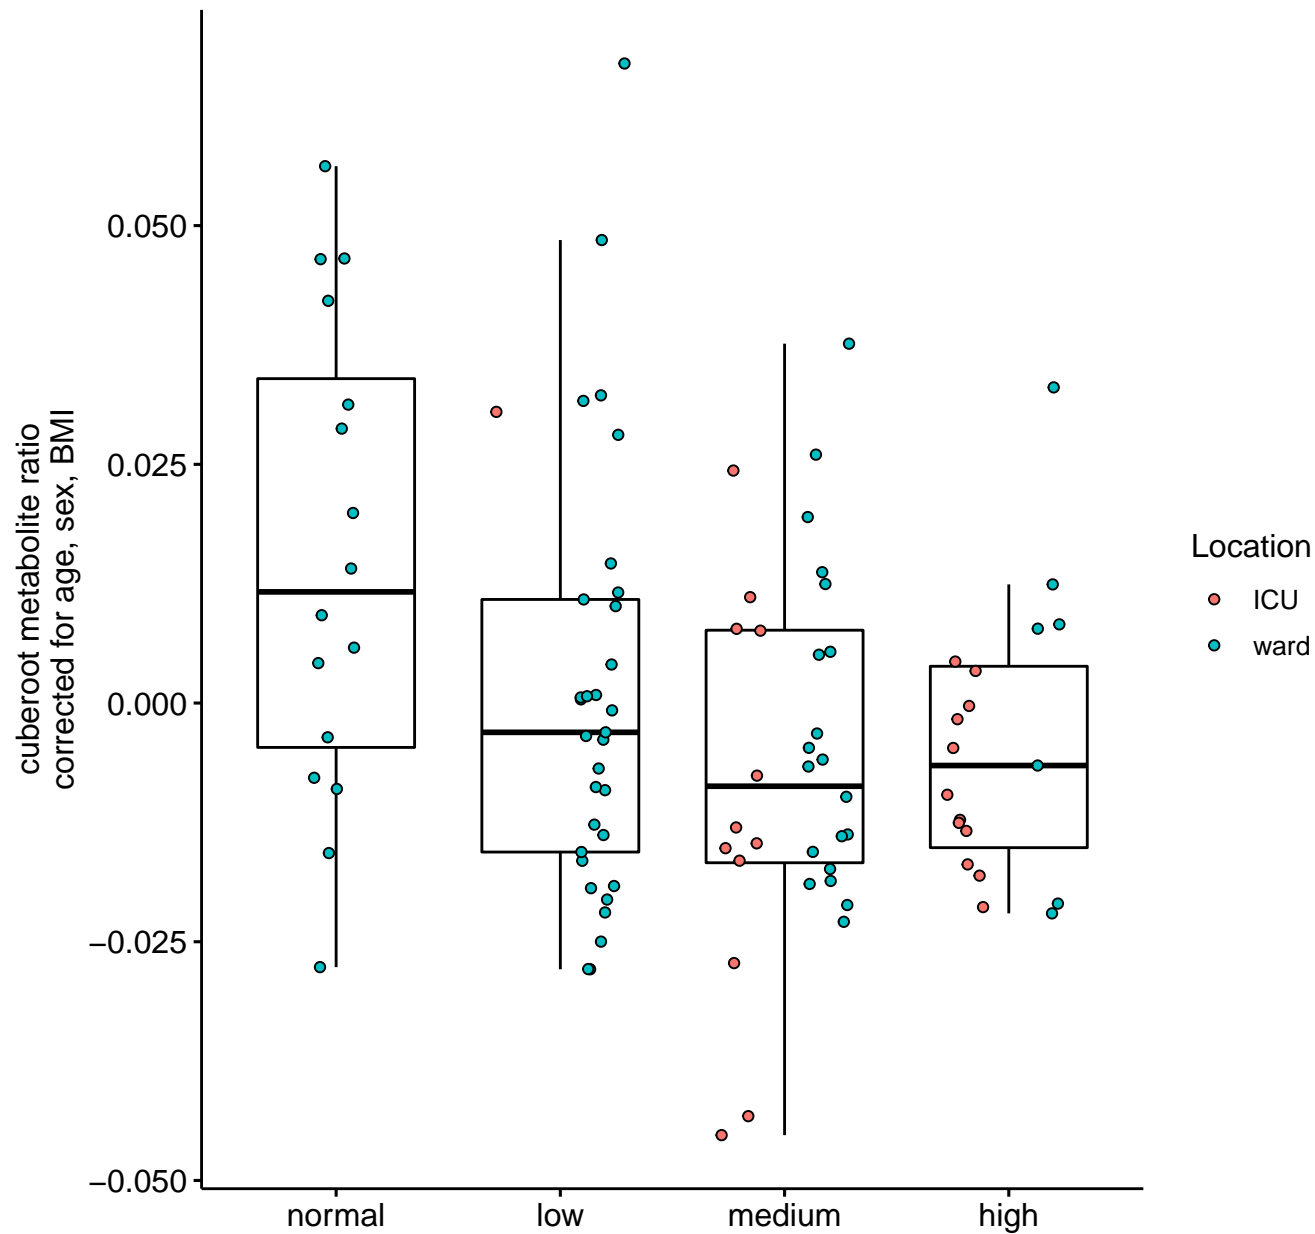

# L.Proline\_amines

cube root metabolite ratio  
corrected for age, sex, BMI

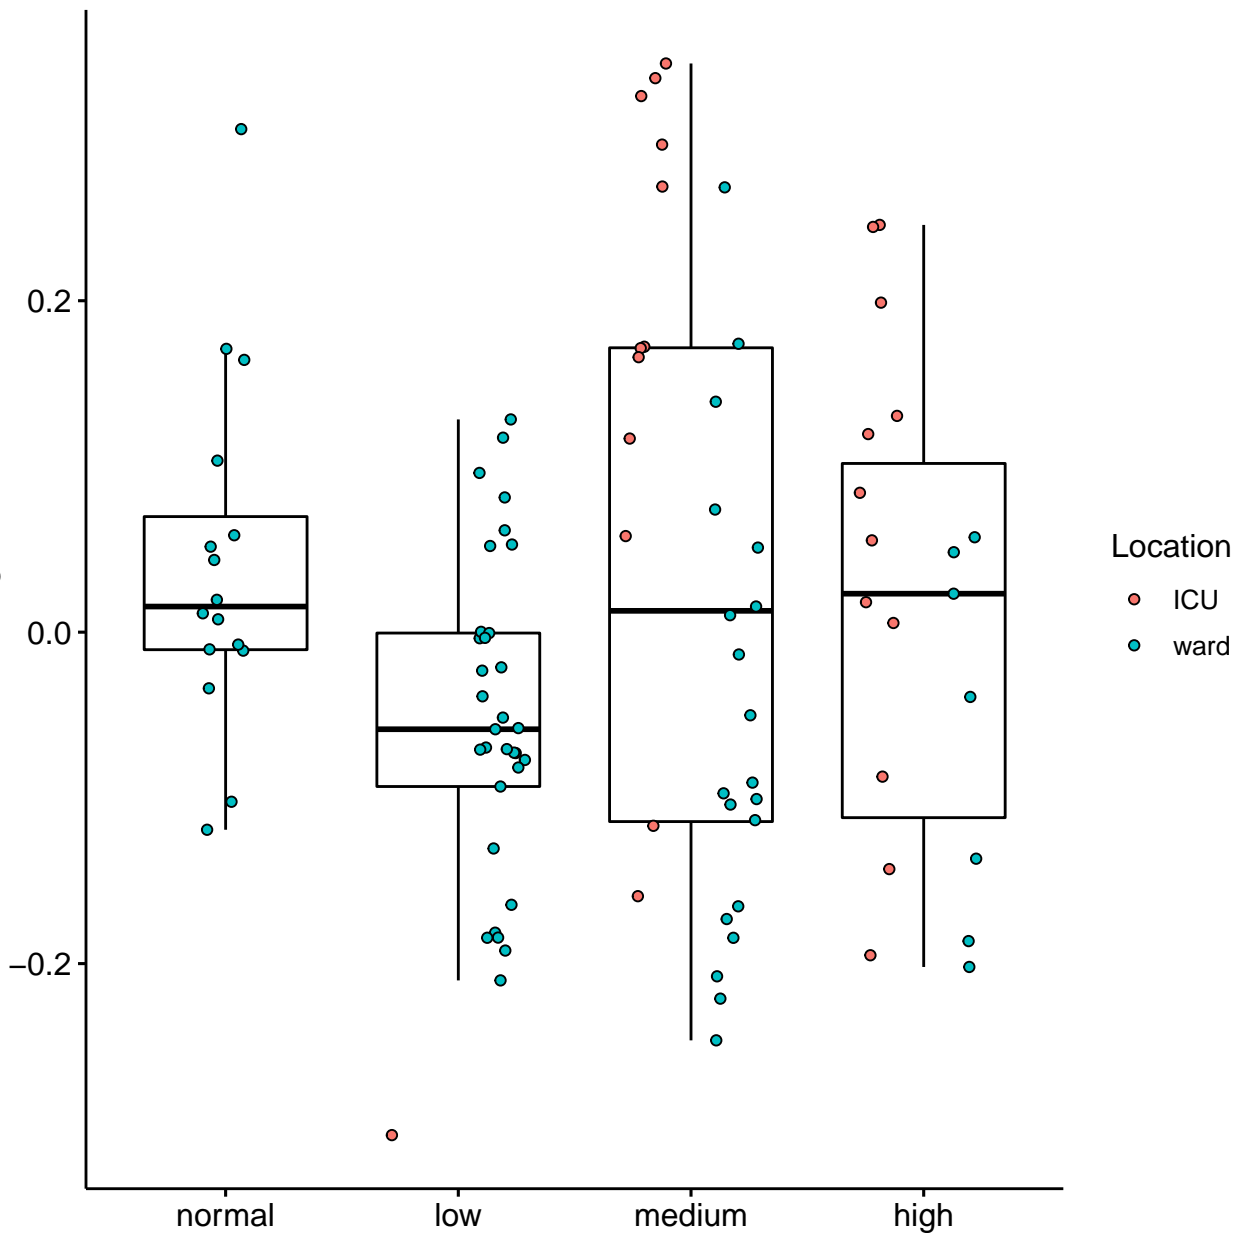

IL18

cuberoor metabolite ratio  
corrected for age, sex, BMI

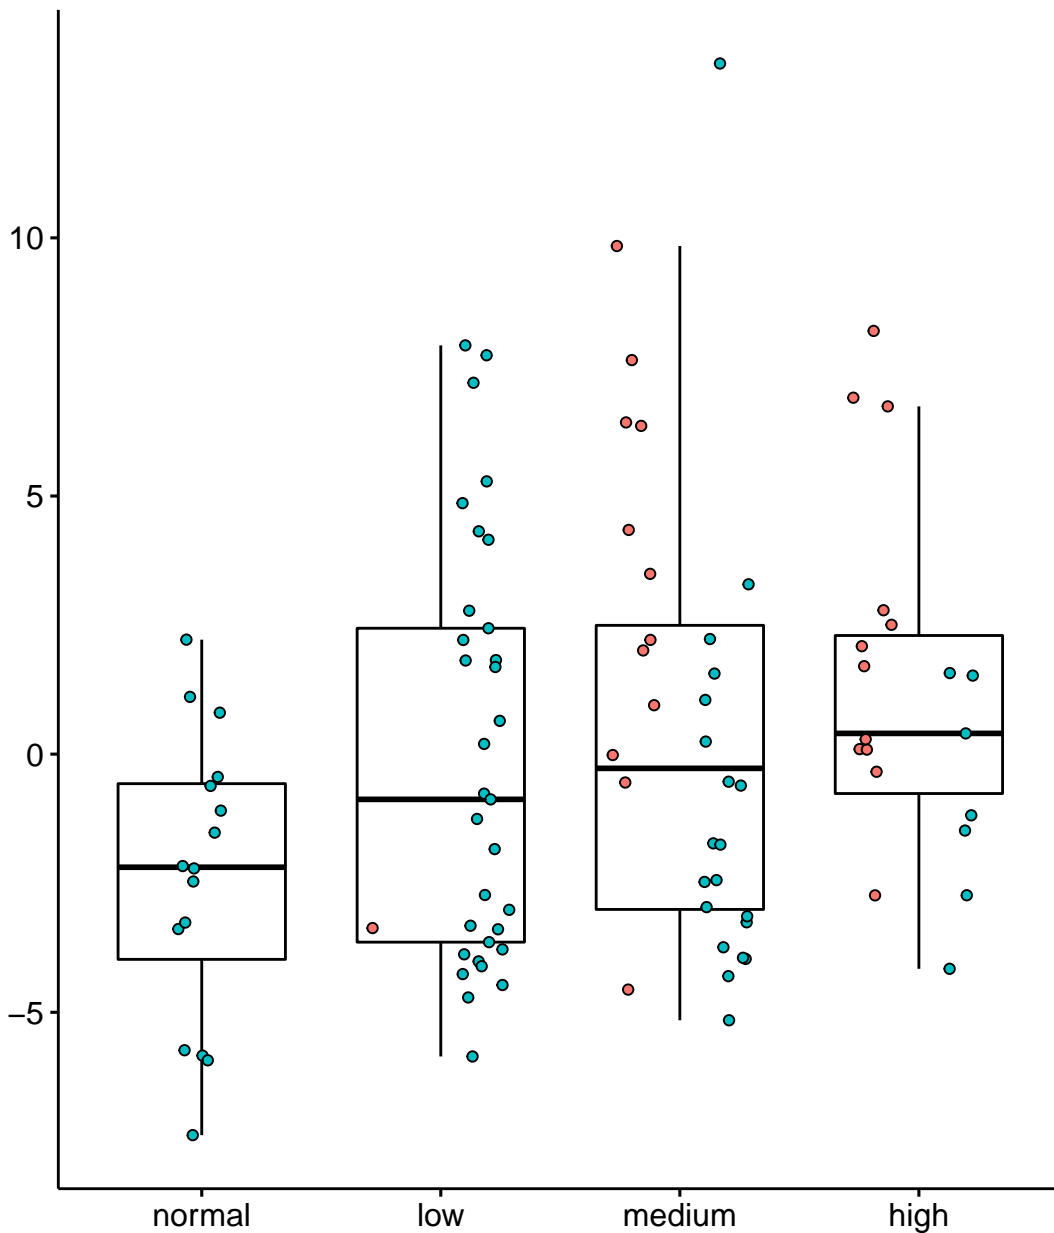

# O.Acetyl.L.serine\_amines\_wc

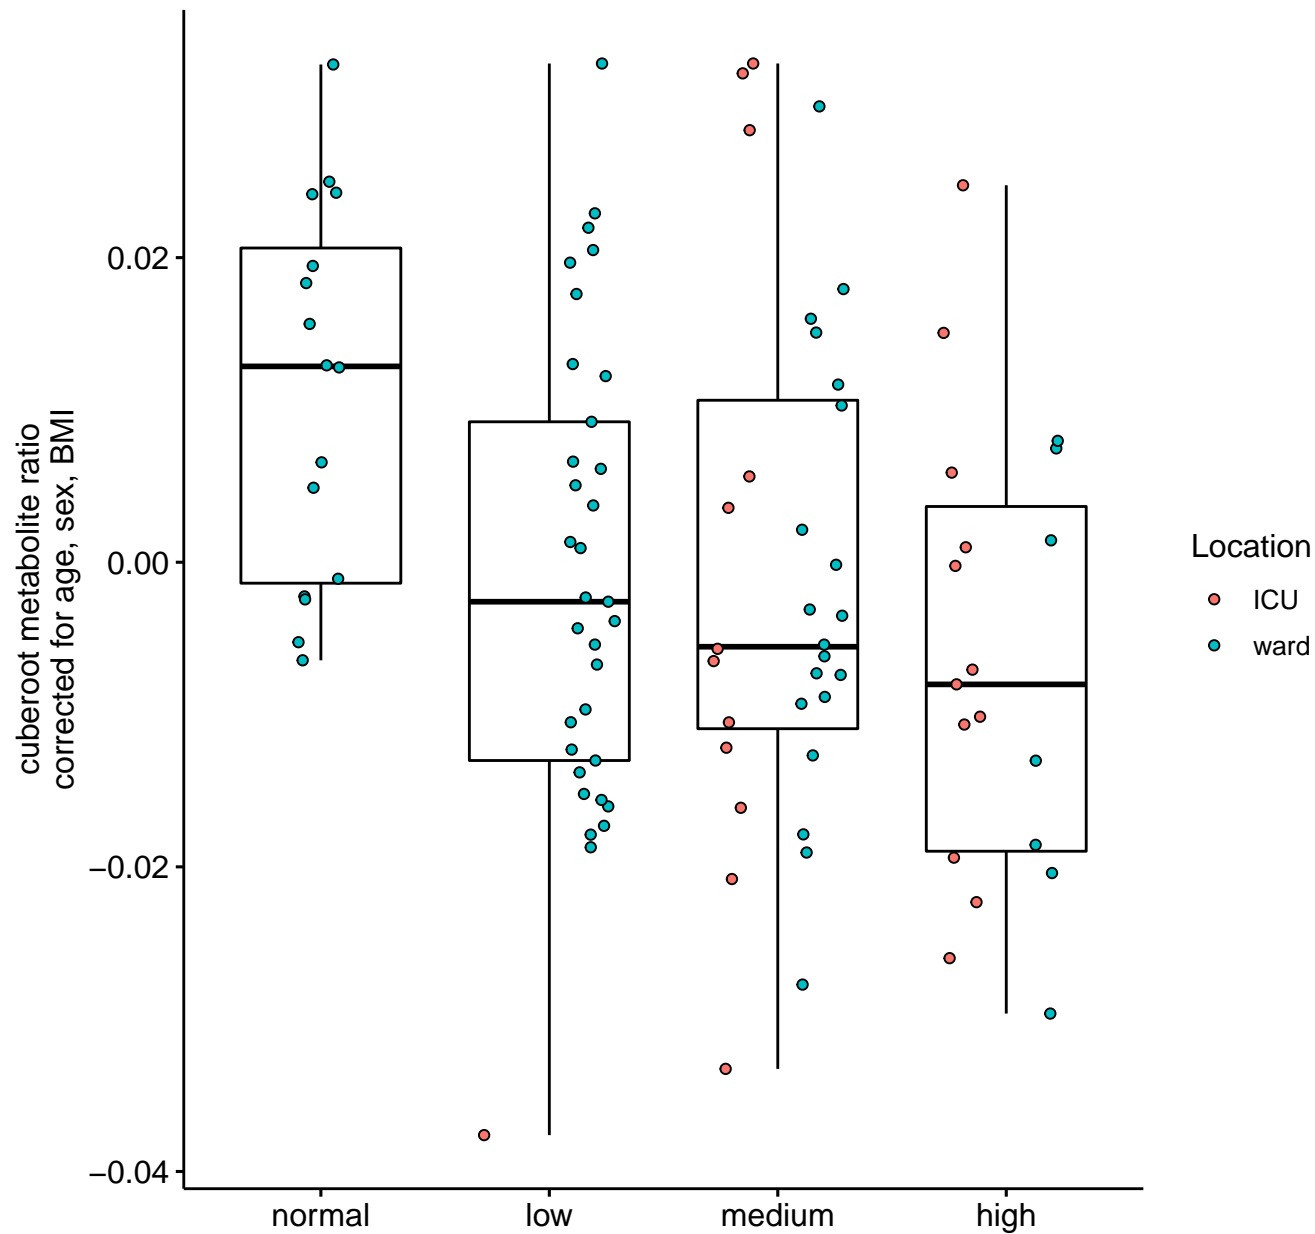

IL12p70

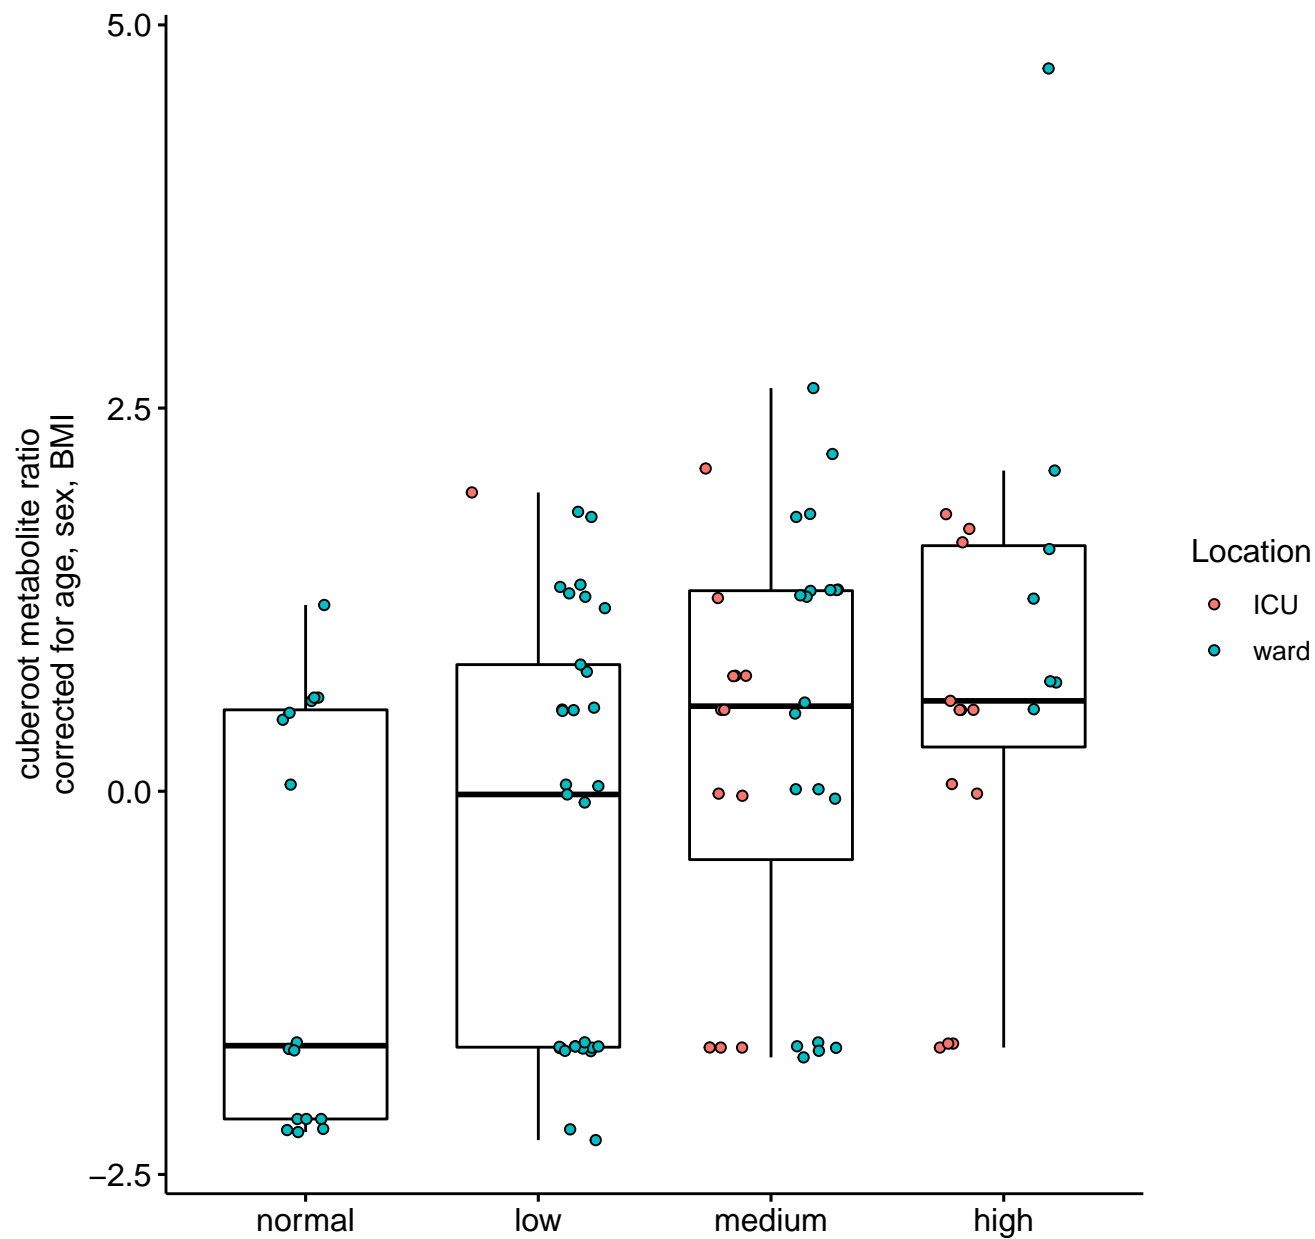

# L.Alpha.aminobutyric.acid\_amines

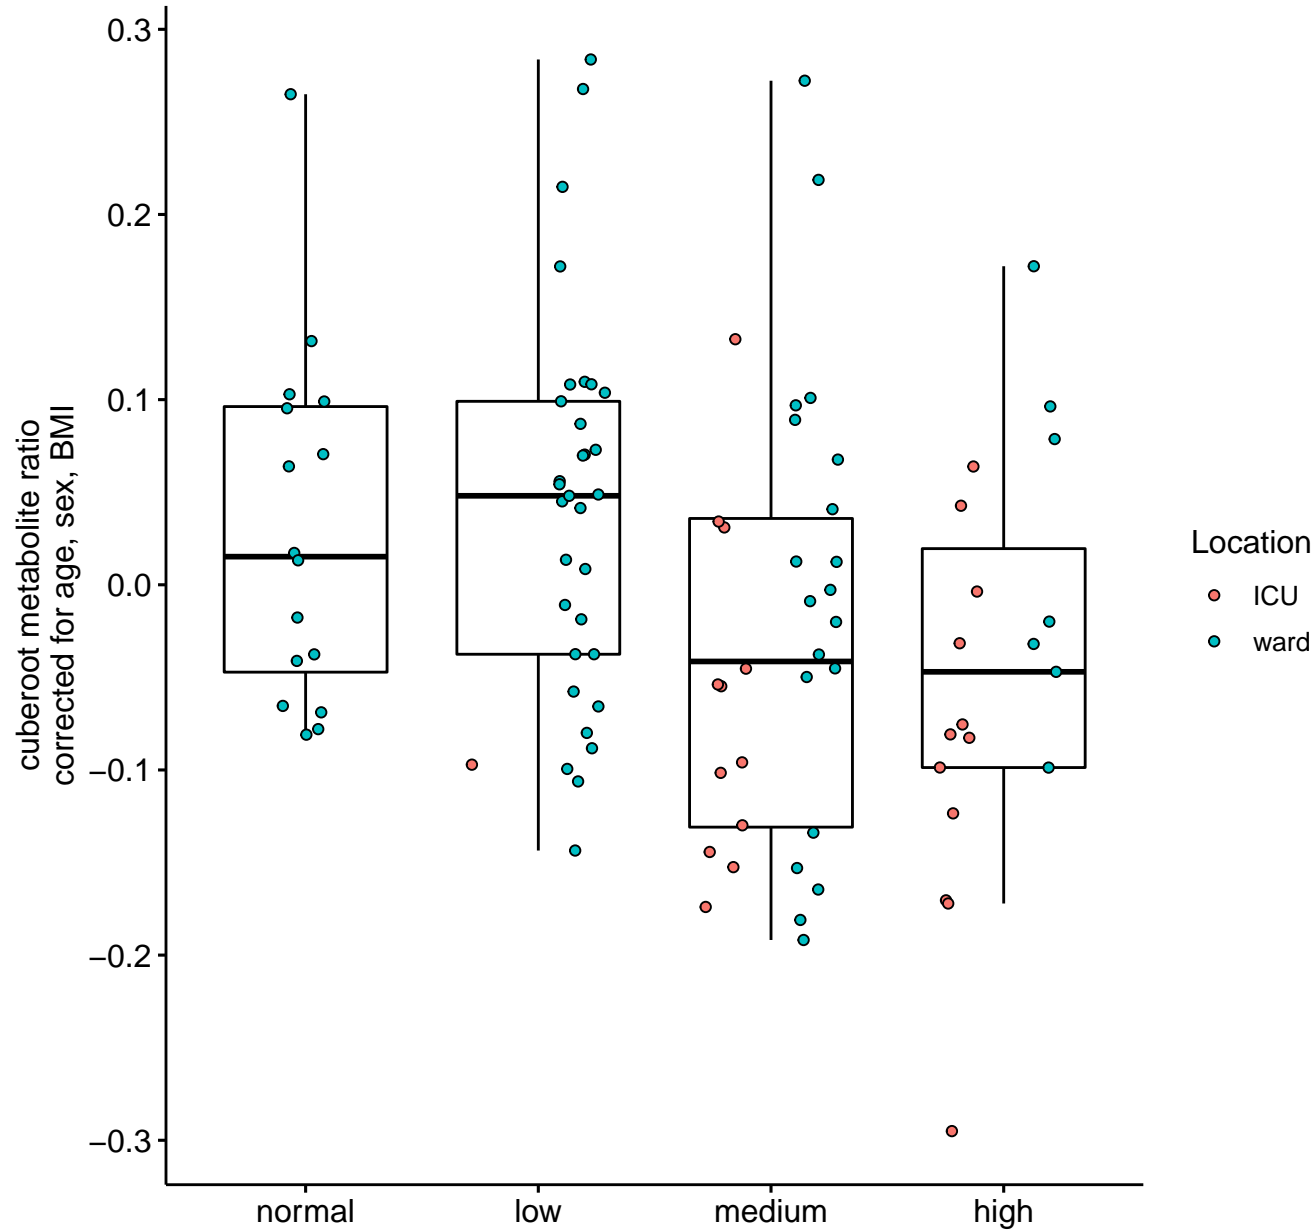

IL10

cube root metabolite ratio  
corrected for age, sex, BMI

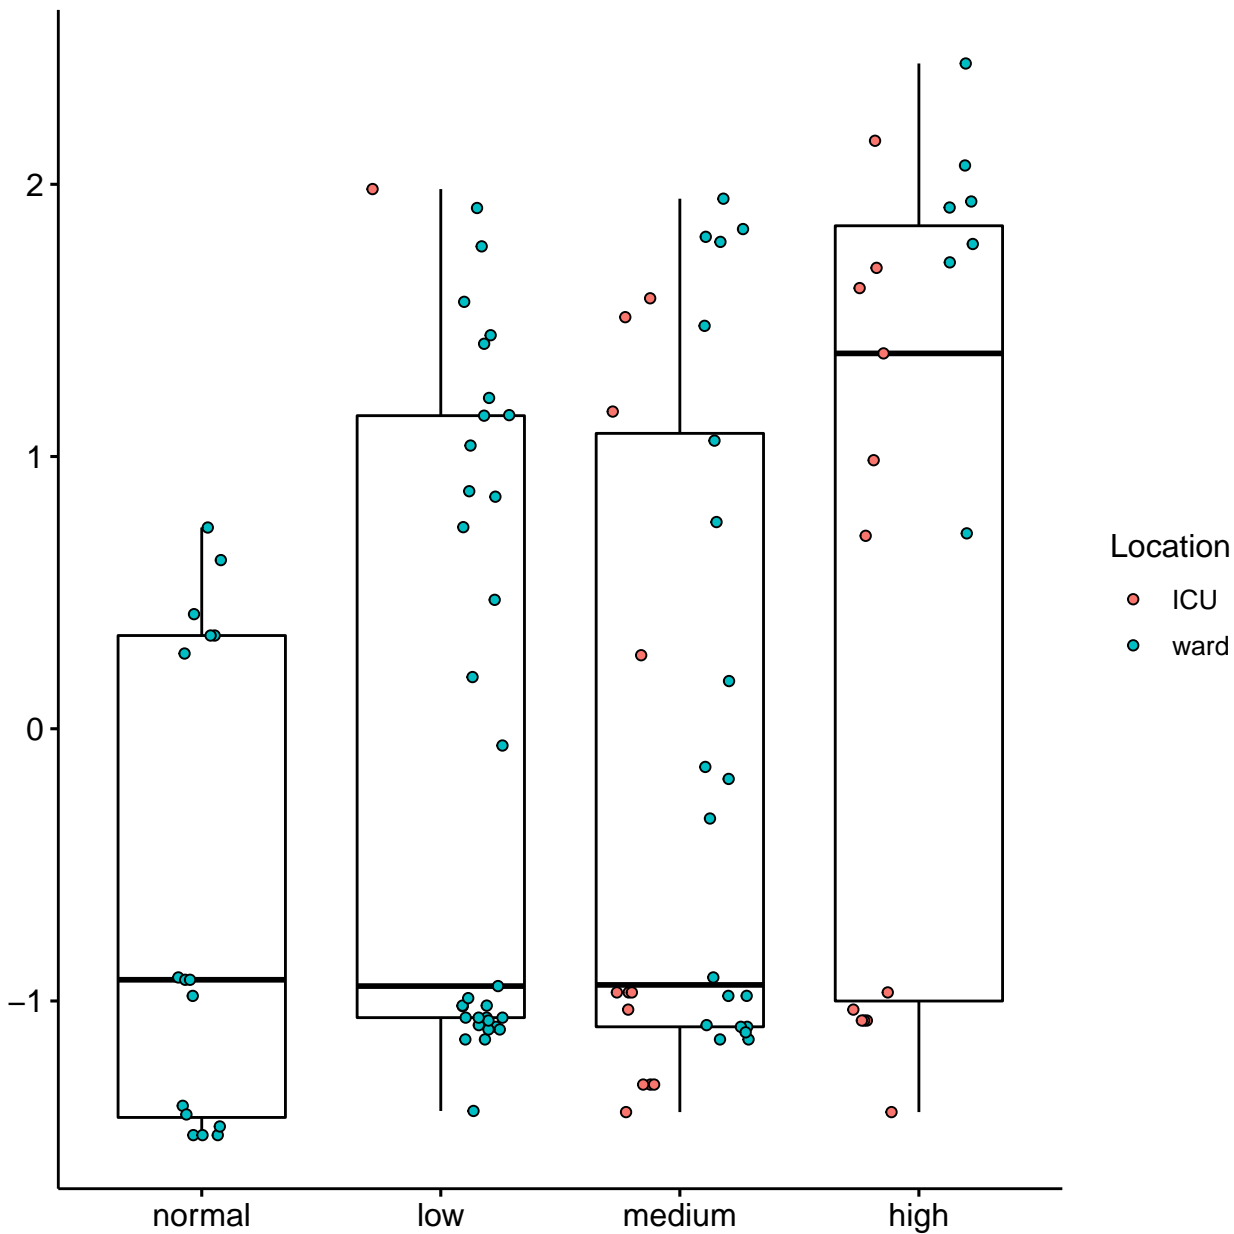



# L.Histidine\_amines

cube root metabolite ratio  
corrected for age, sex, BMI

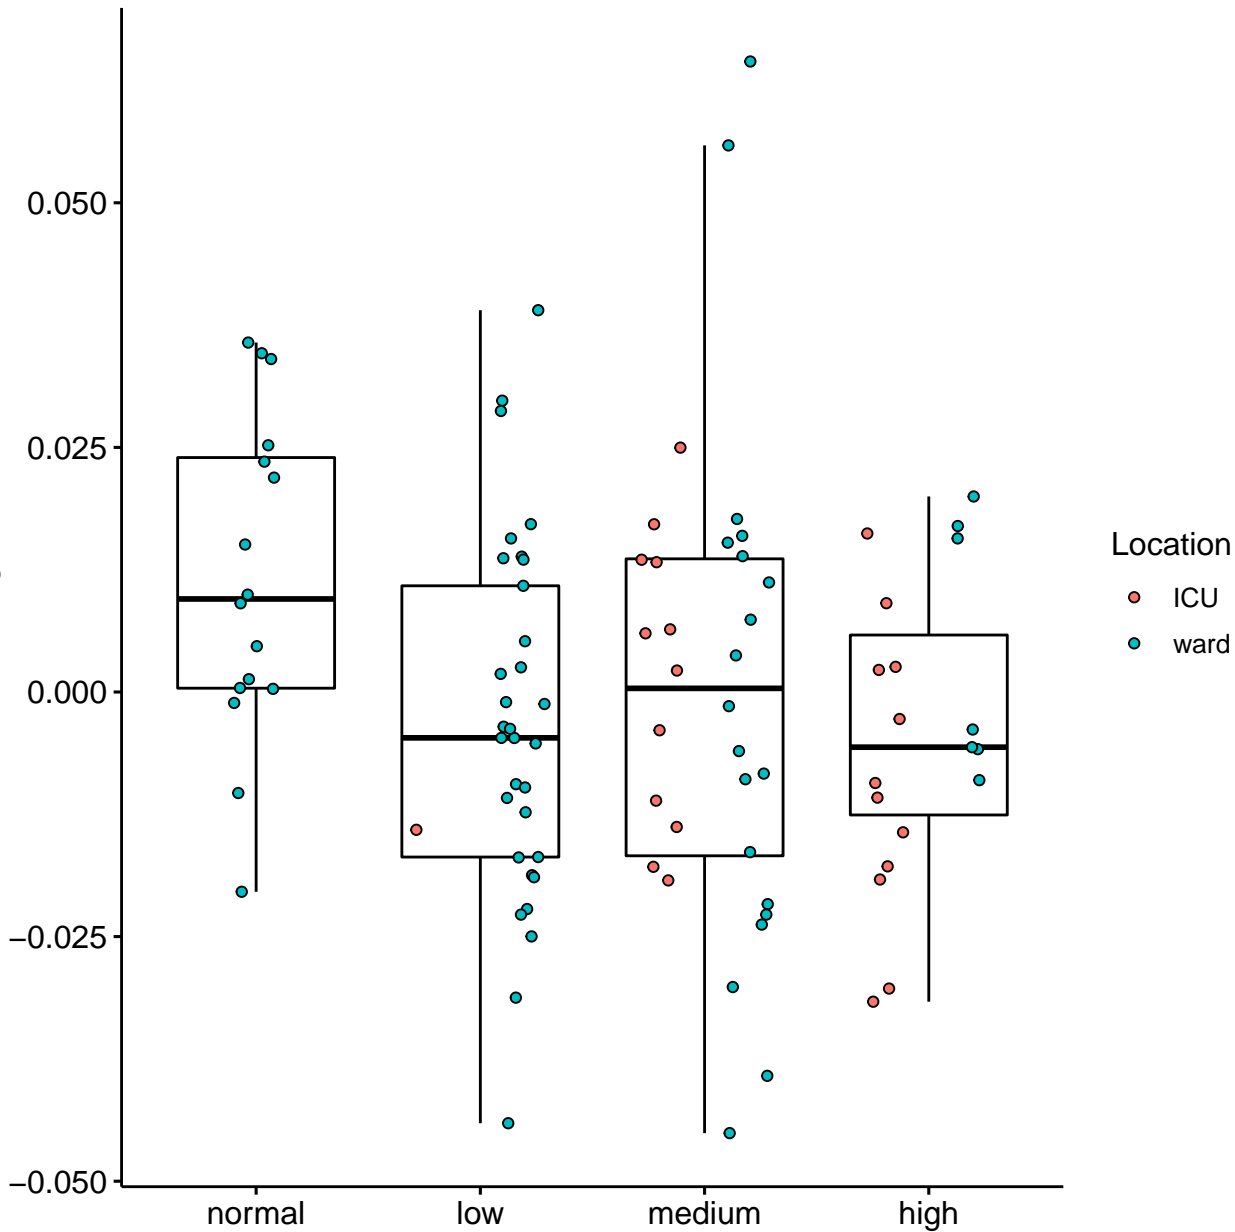

# Glycylproline\_amines

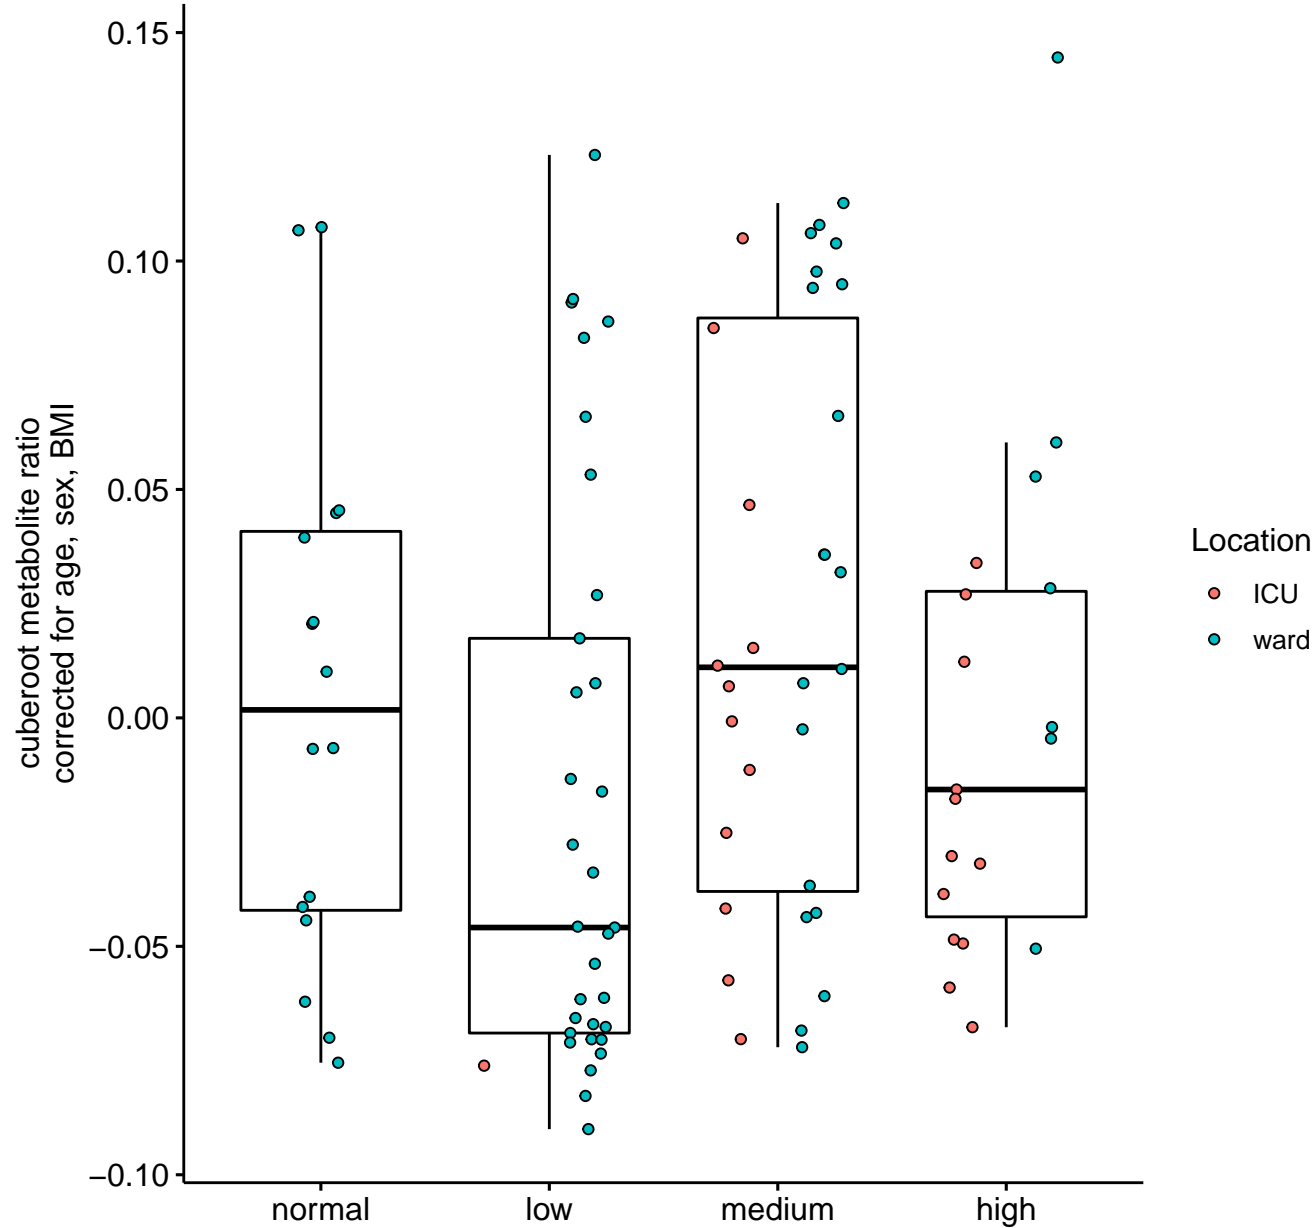

# L.Carnosine\_amines

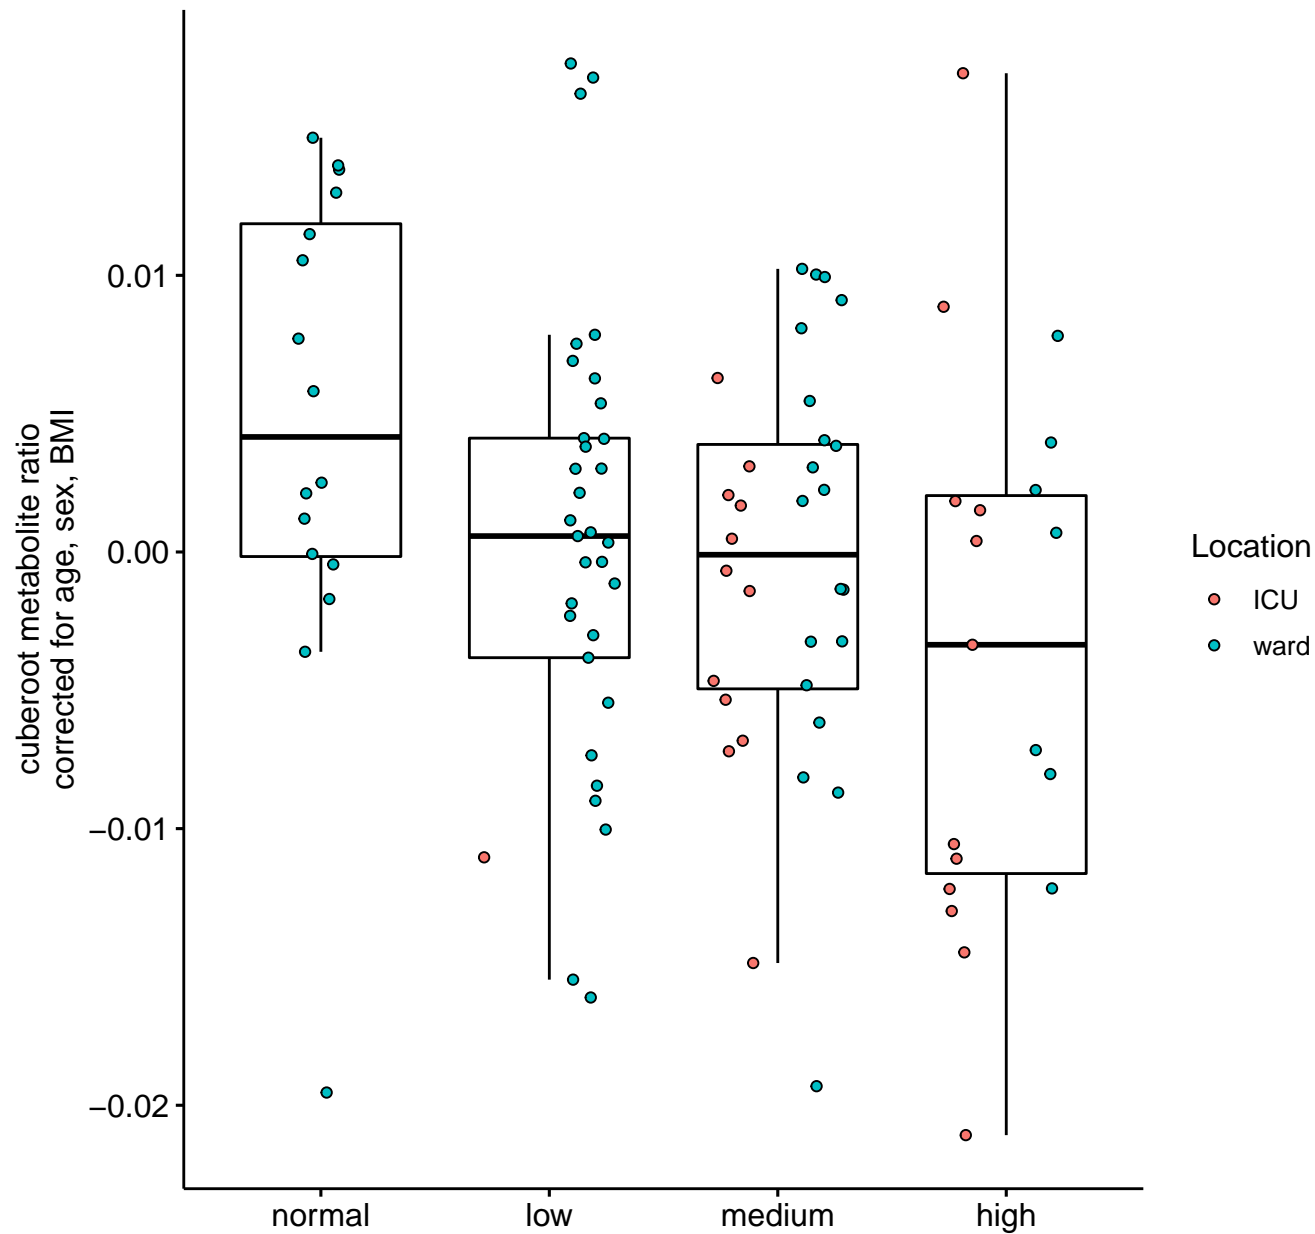

# Homocitrulline\_amines

cube root metabolite ratio  
corrected for age, sex, BMI

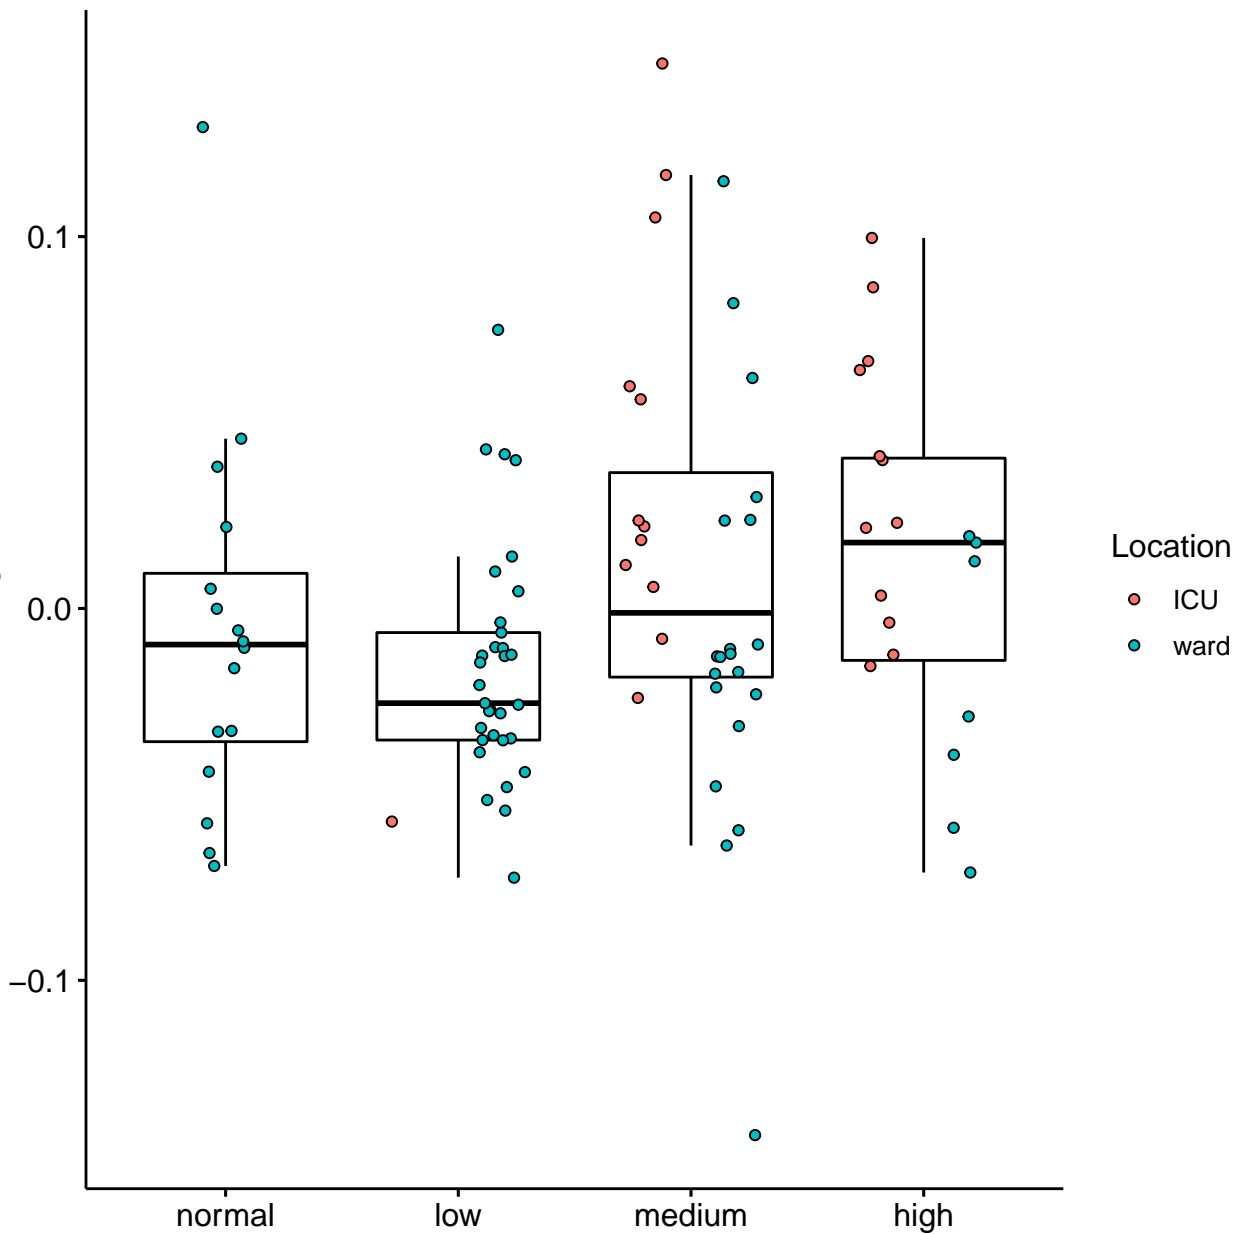

# GALECTIN9

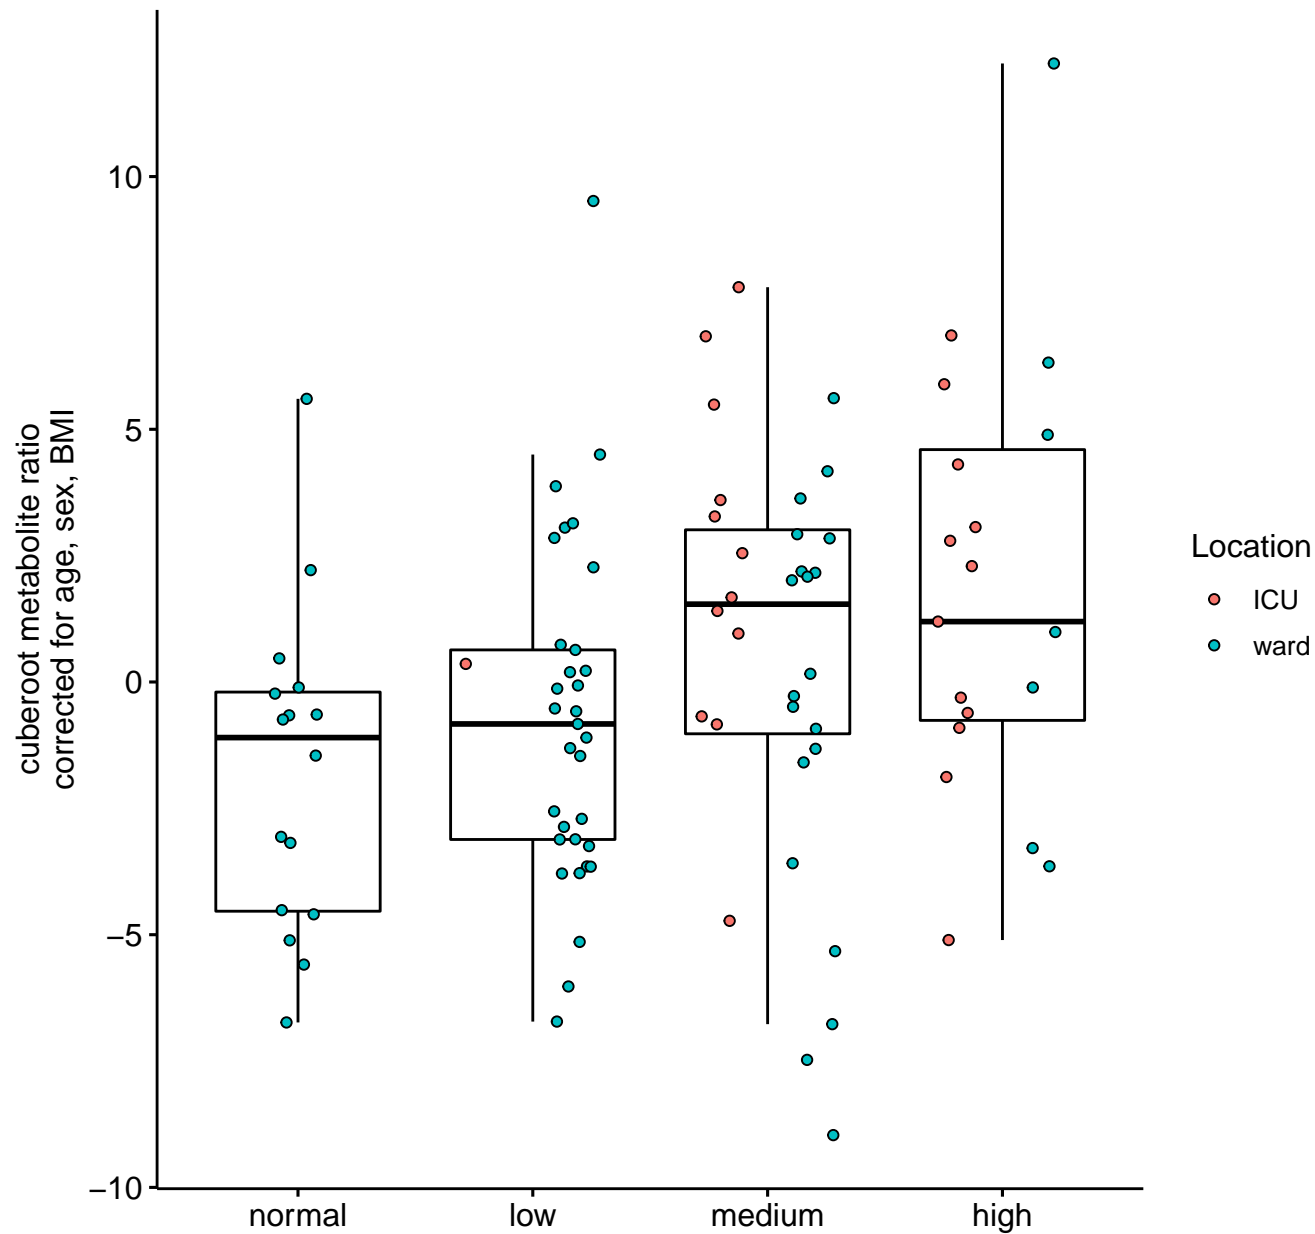

# X1.Methylhistidine\_amines\_wc

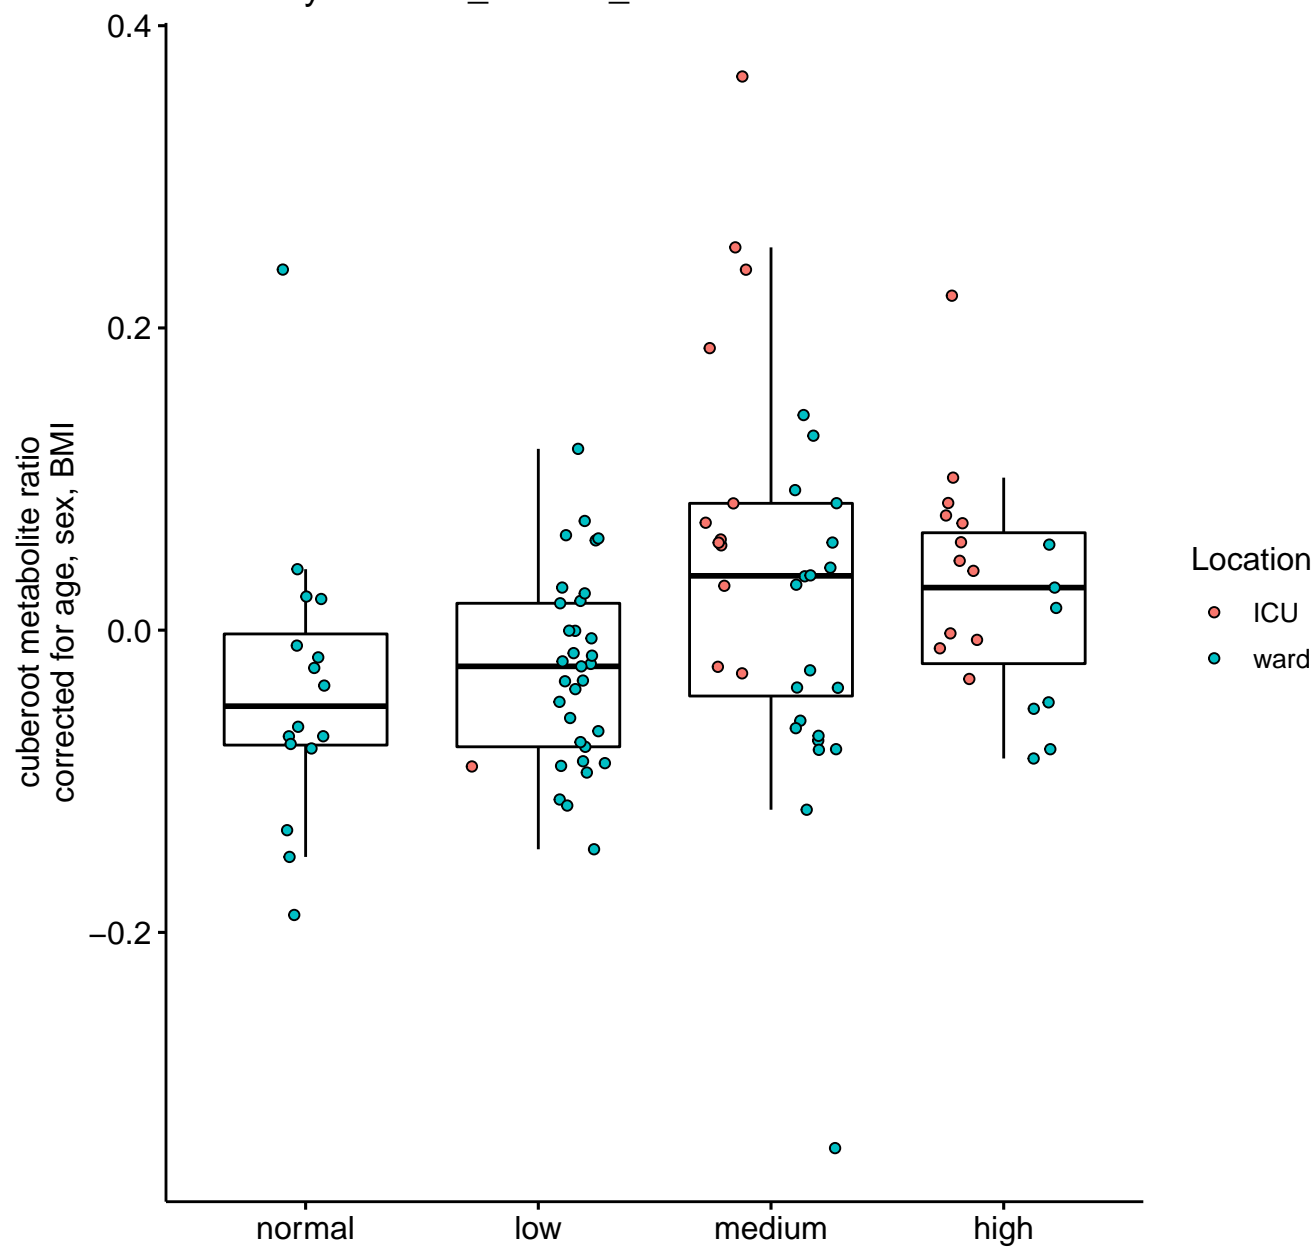

# Gamma.L.glutamyl.L.alanine\_amines

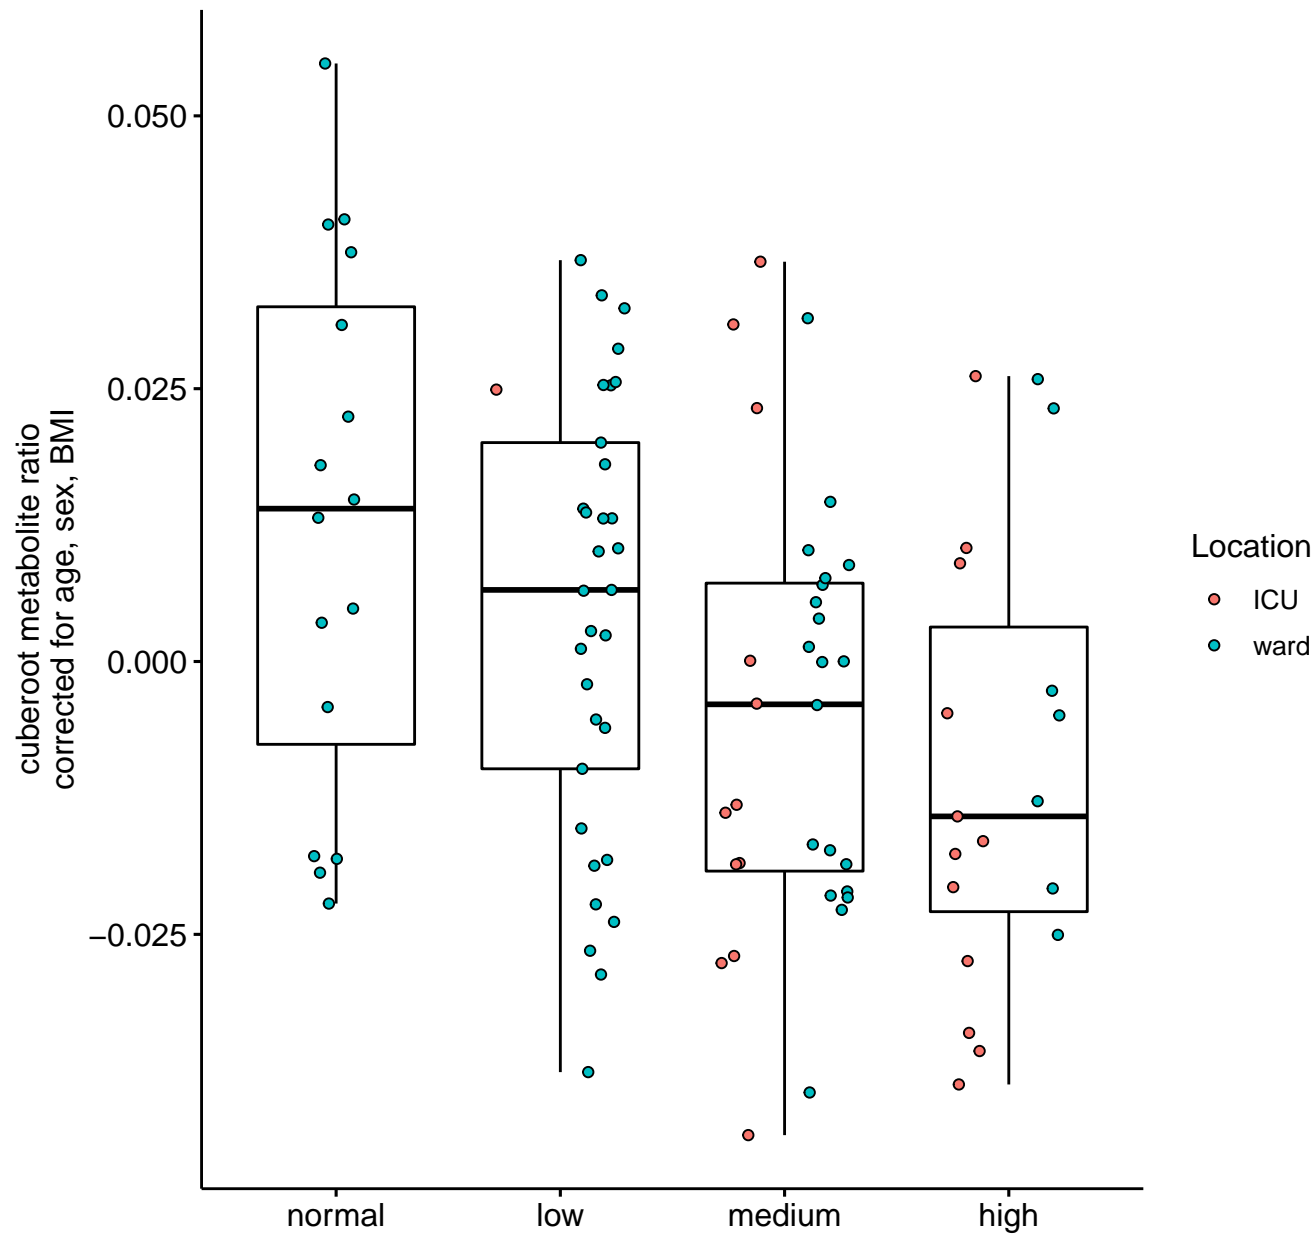

# Cysteine\_amines

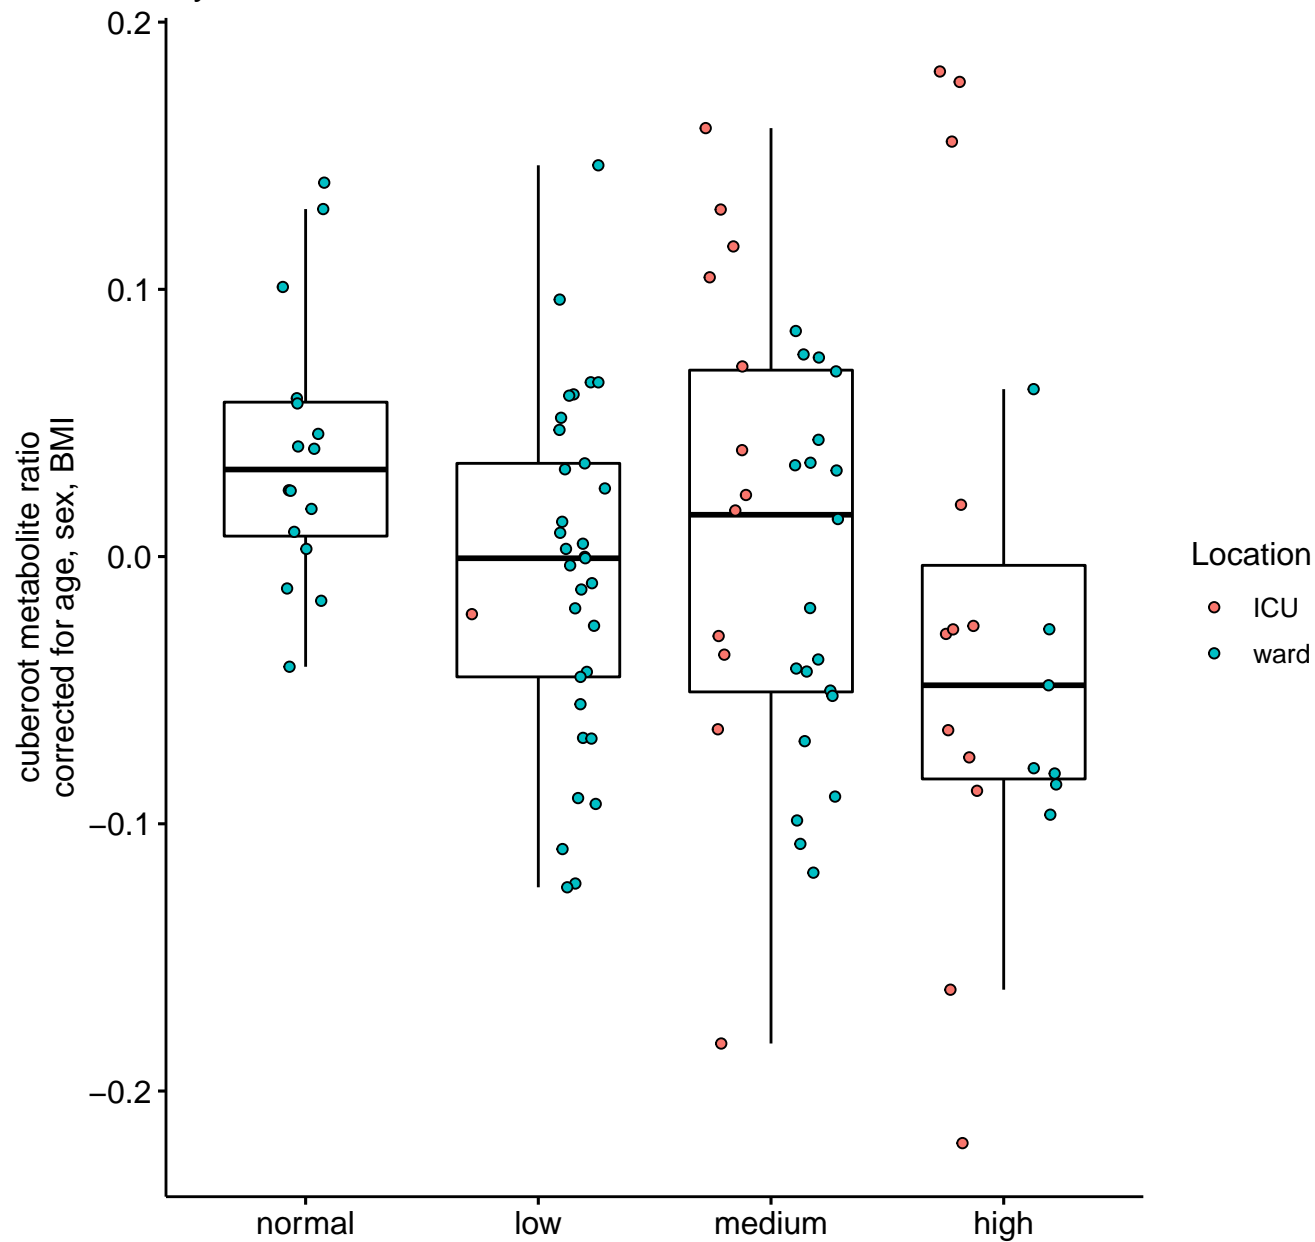



# L.Tyrosine\_amines

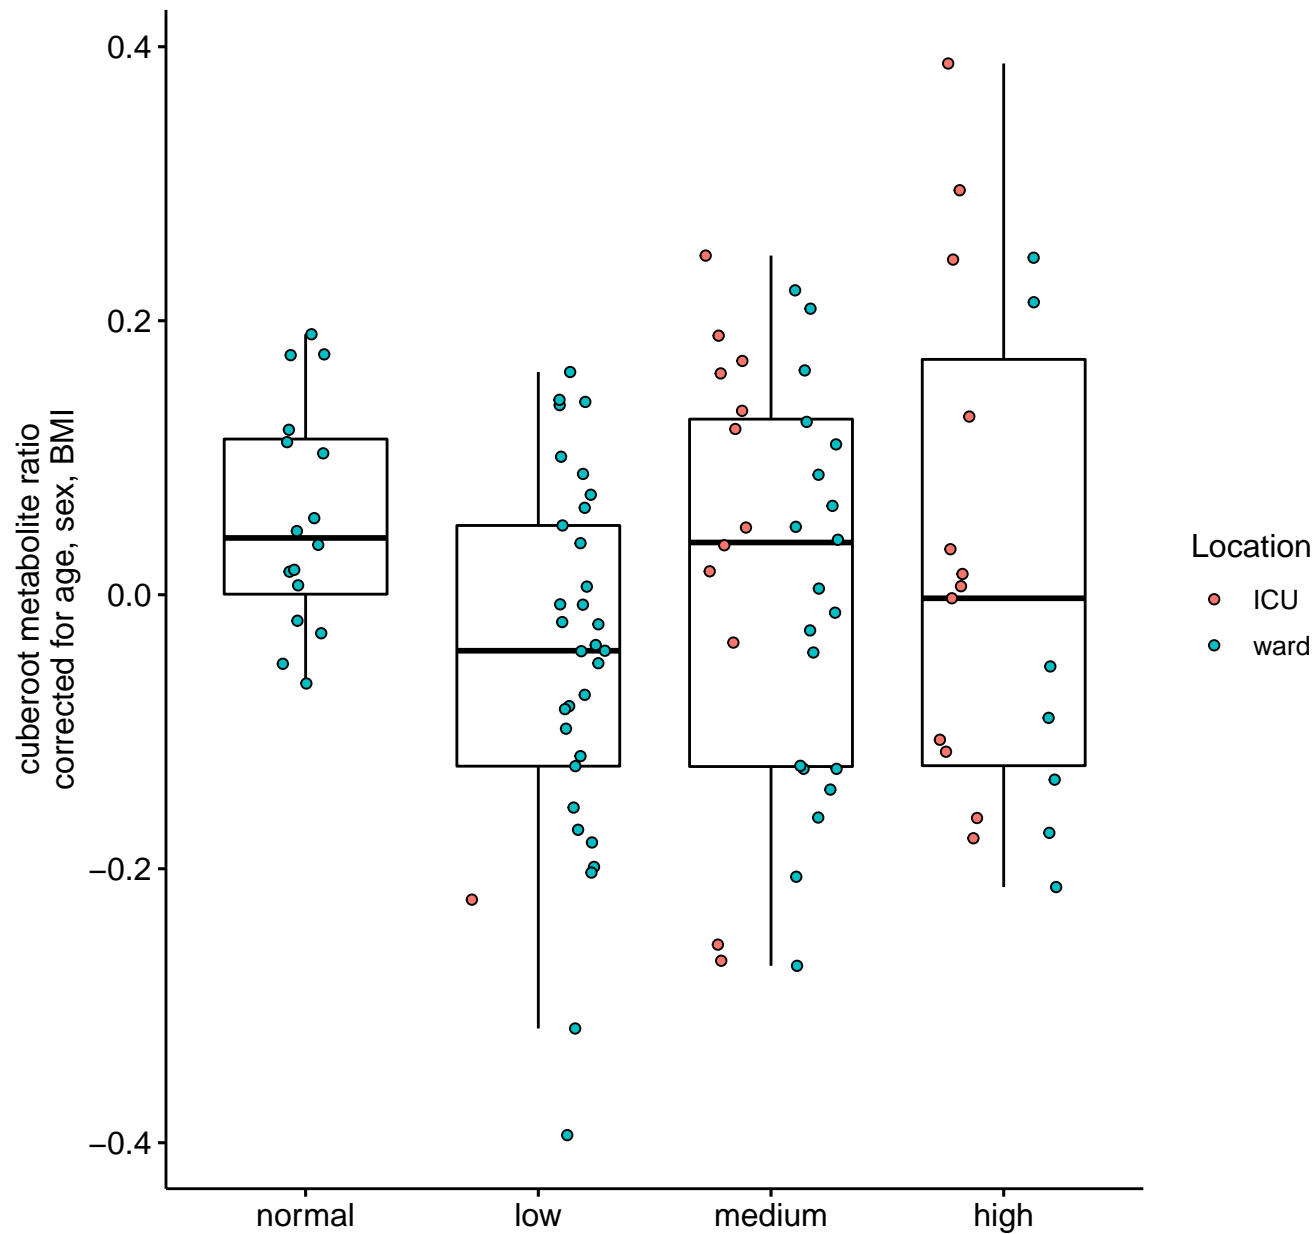

# Leukocytes

cube root metabolite ratio  
corrected for age, sex, BMI

0.75  
0.50  
0.25  
0.00  
-0.25  
-0.50

normal

low

medium

high

Location

ICU  
ward

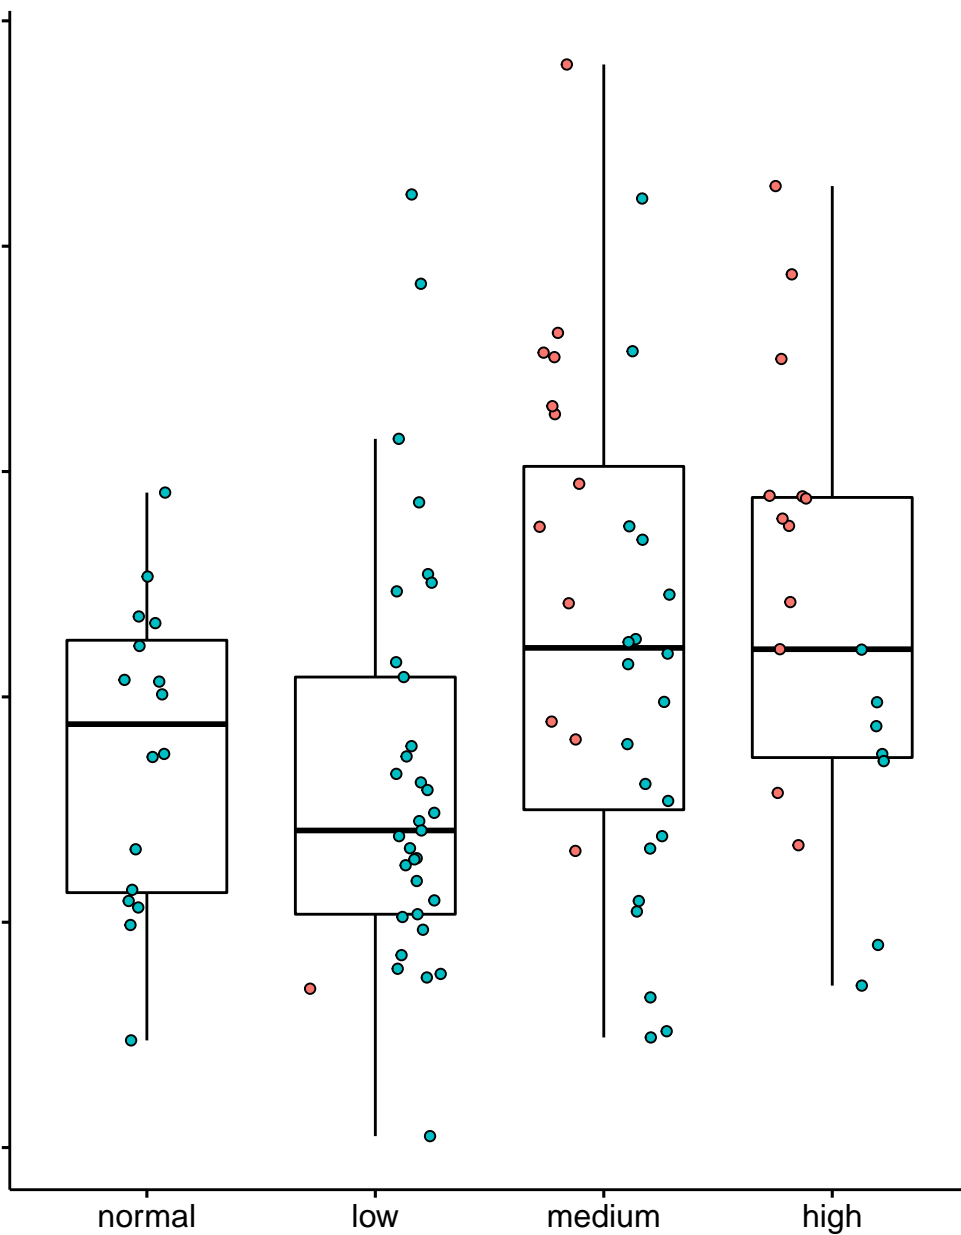

# Saccharopine\_amines\_wc

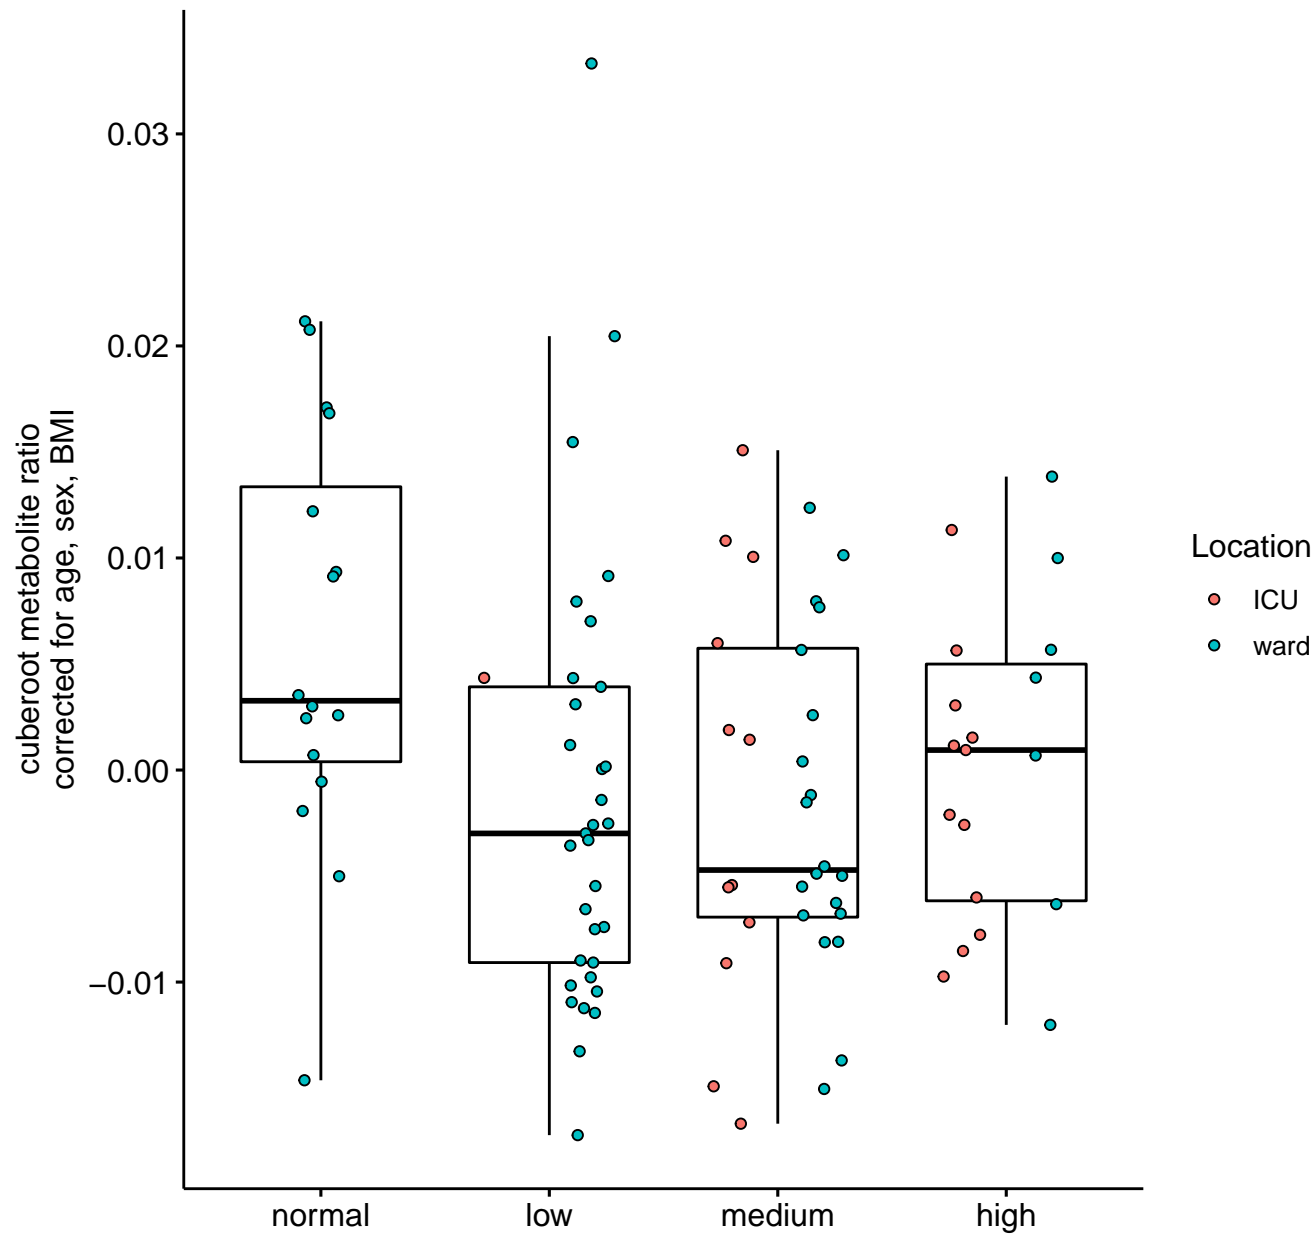

# Hydroxylysine\_amines

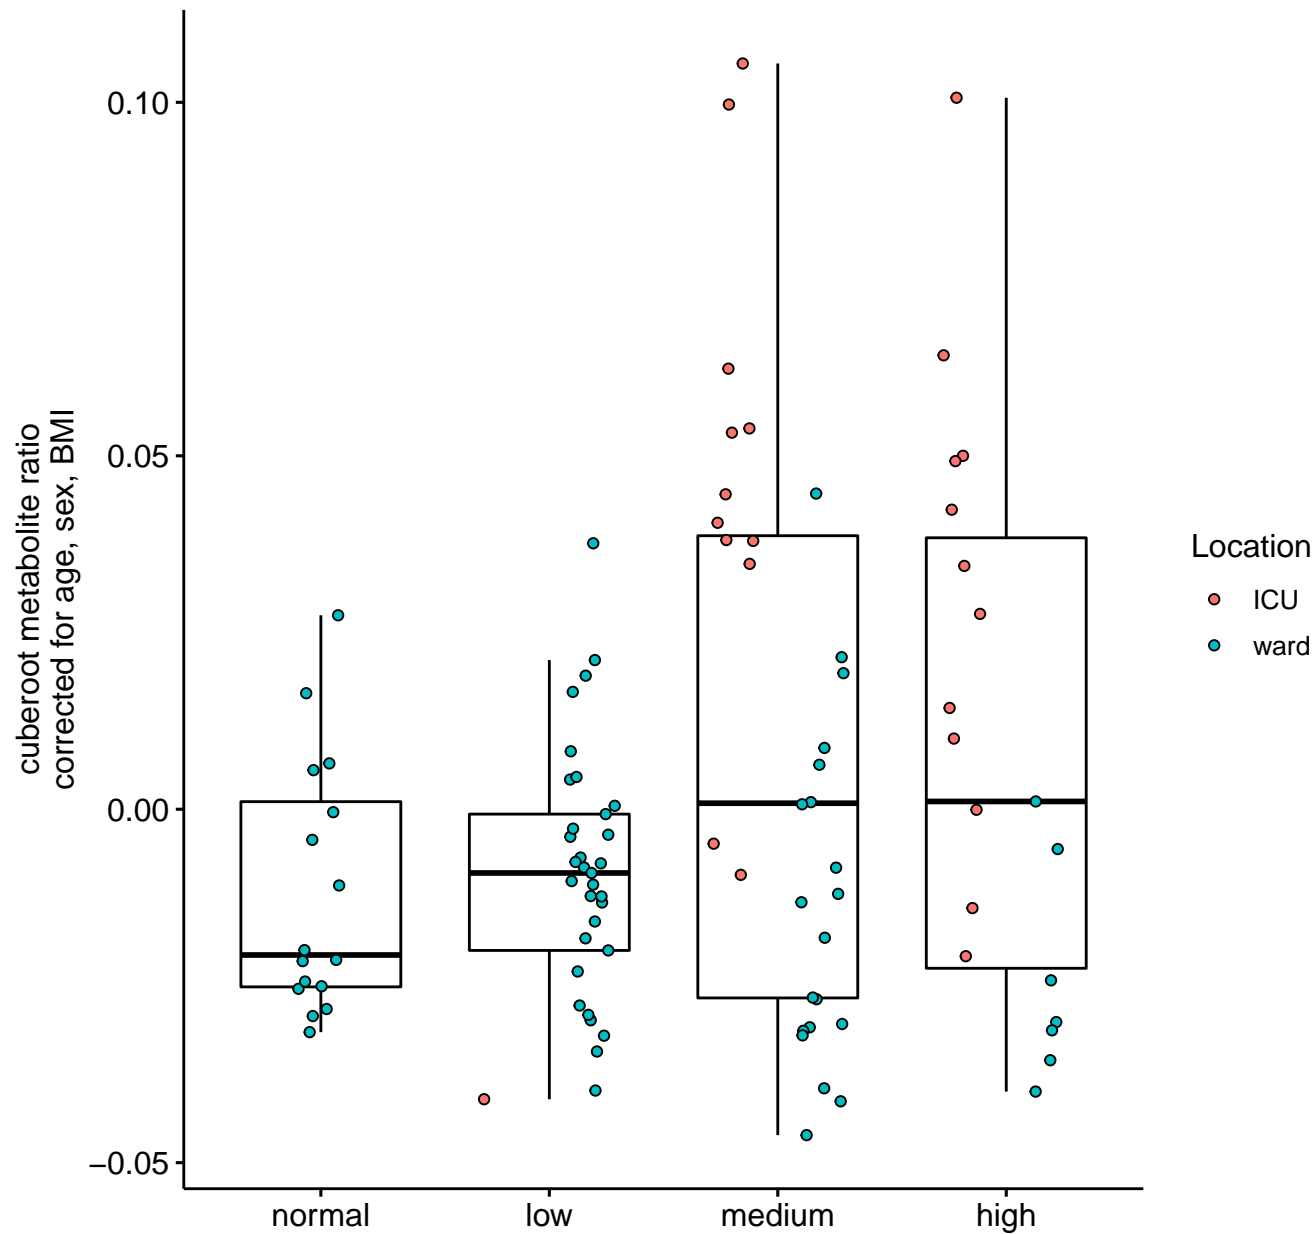

# CCL3

cube root metabolite ratio  
corrected for age, sex, BMI

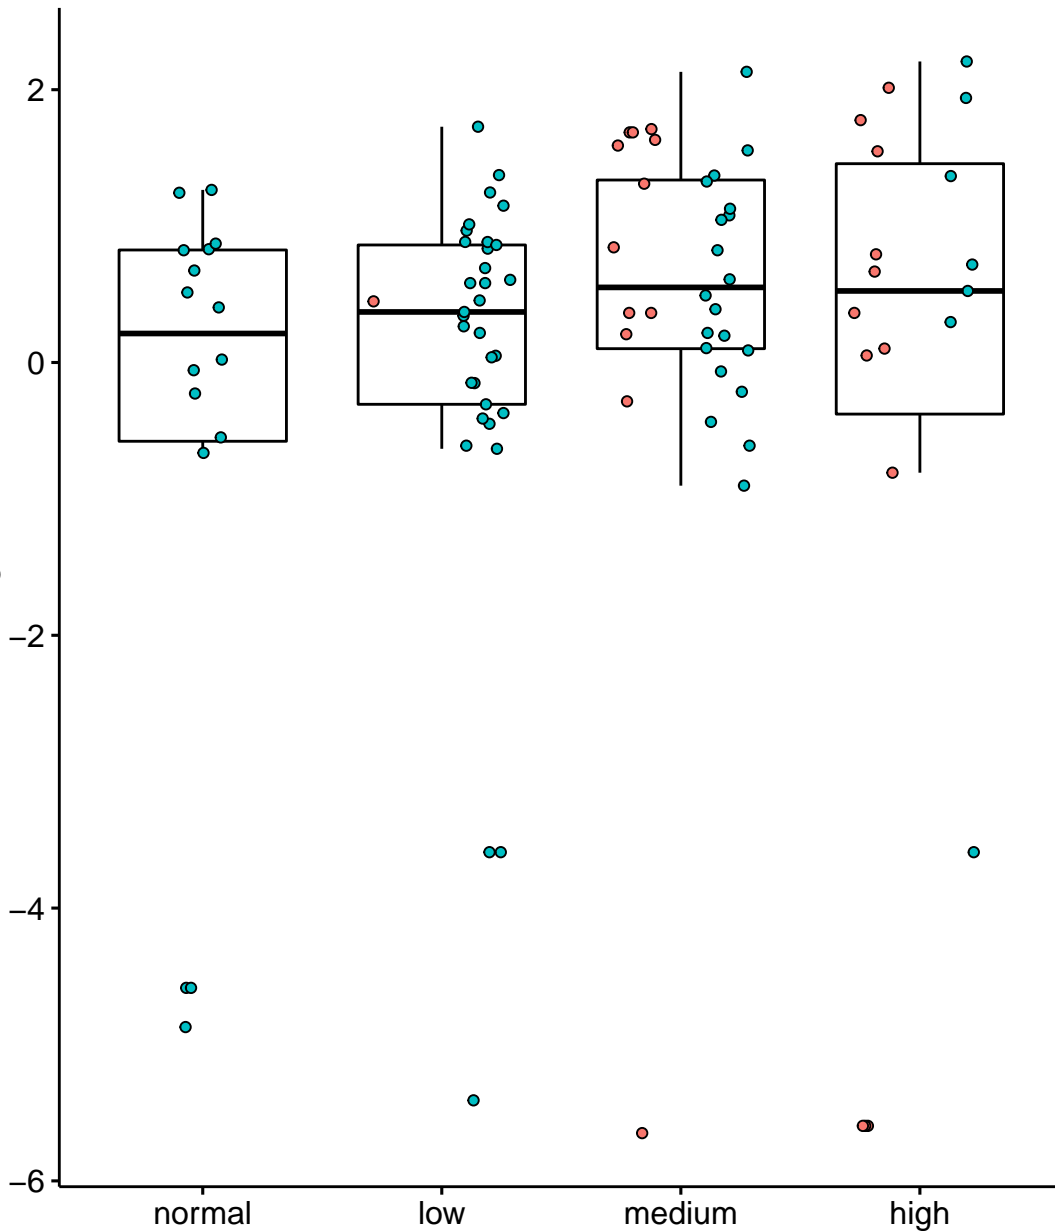

Location

ICU

ward

# T\_Cells

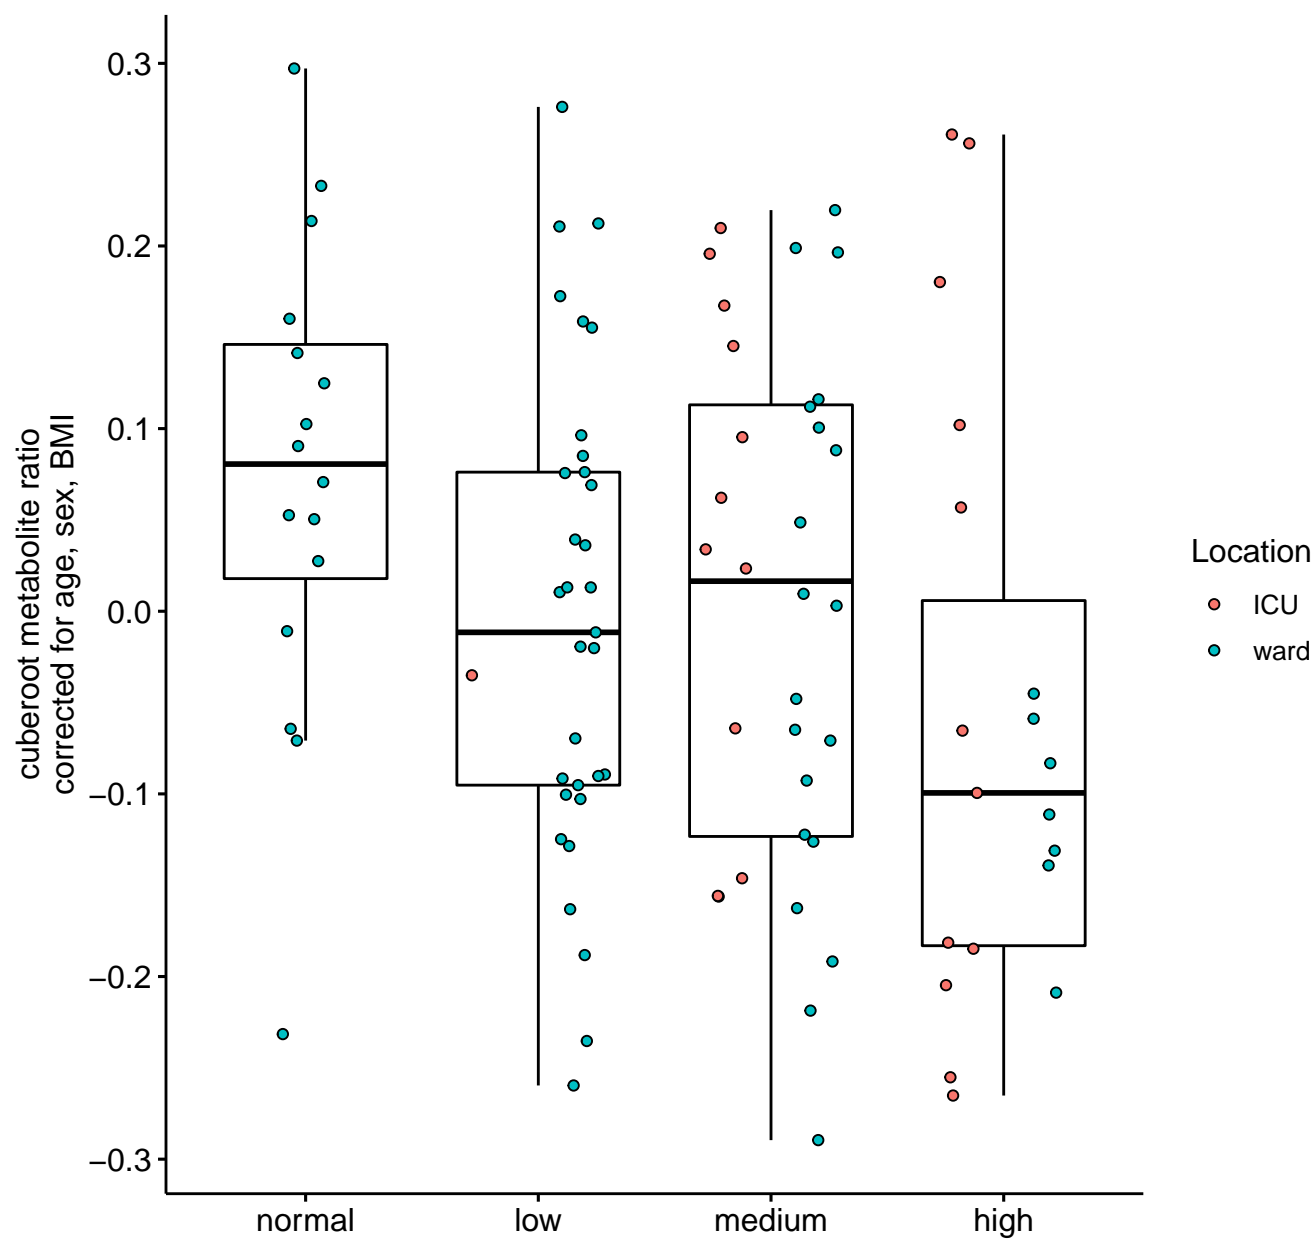

# L.Glutamic.acid\_amines

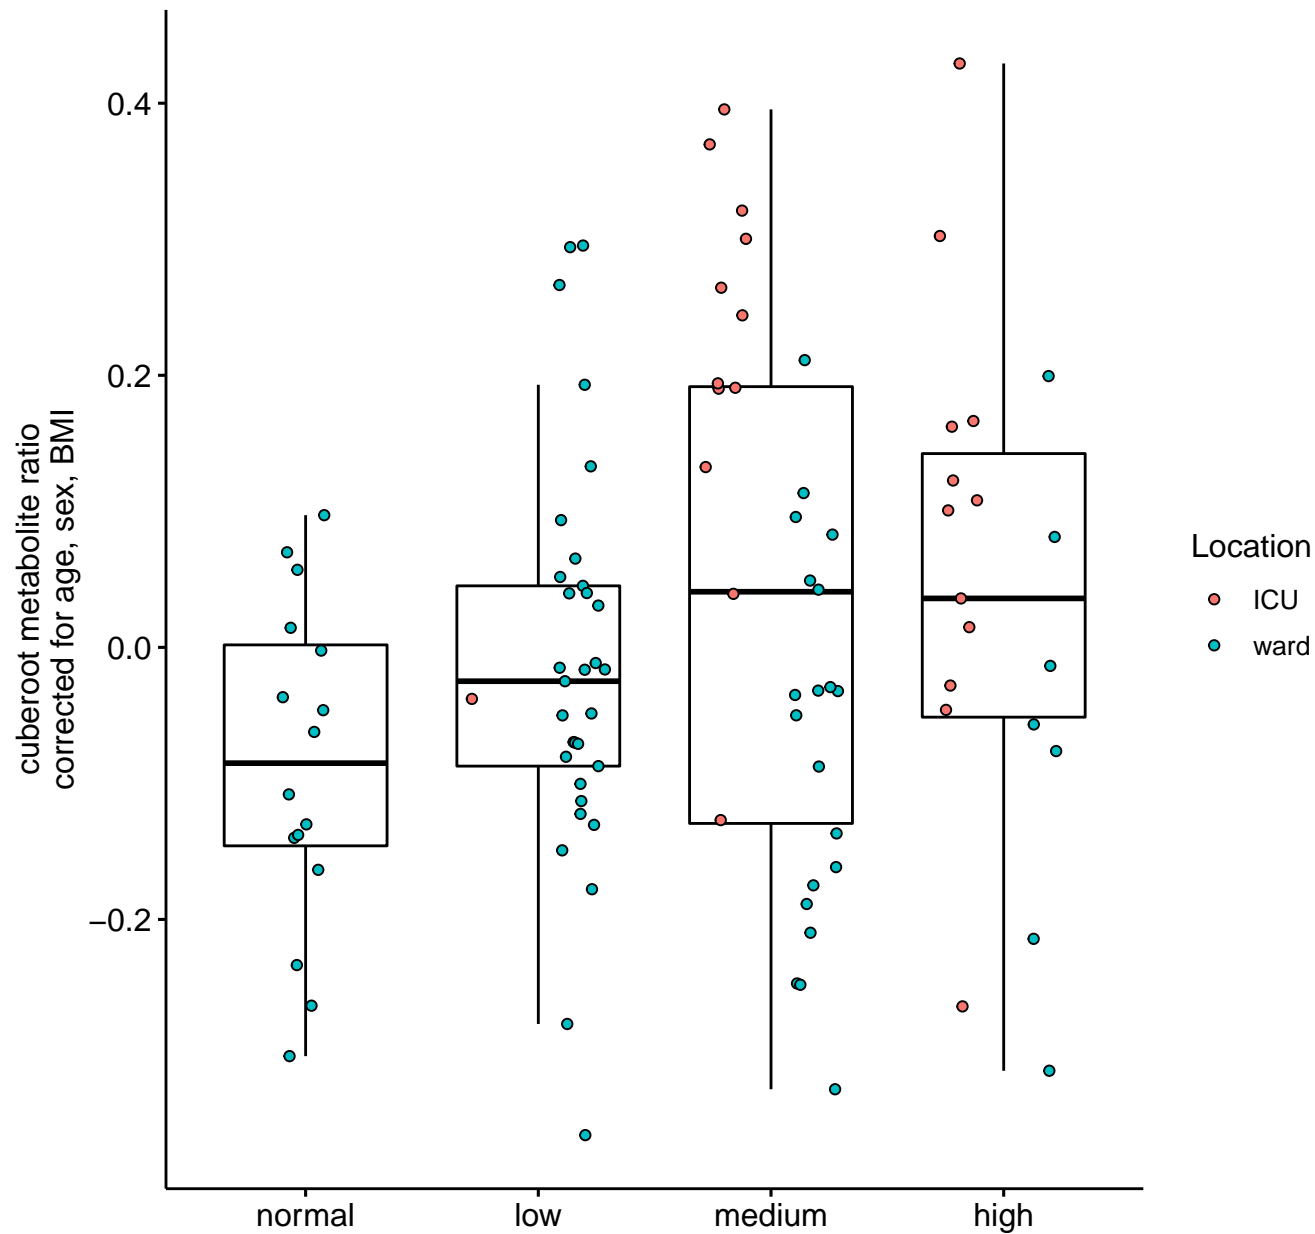

# Serotonin\_trp

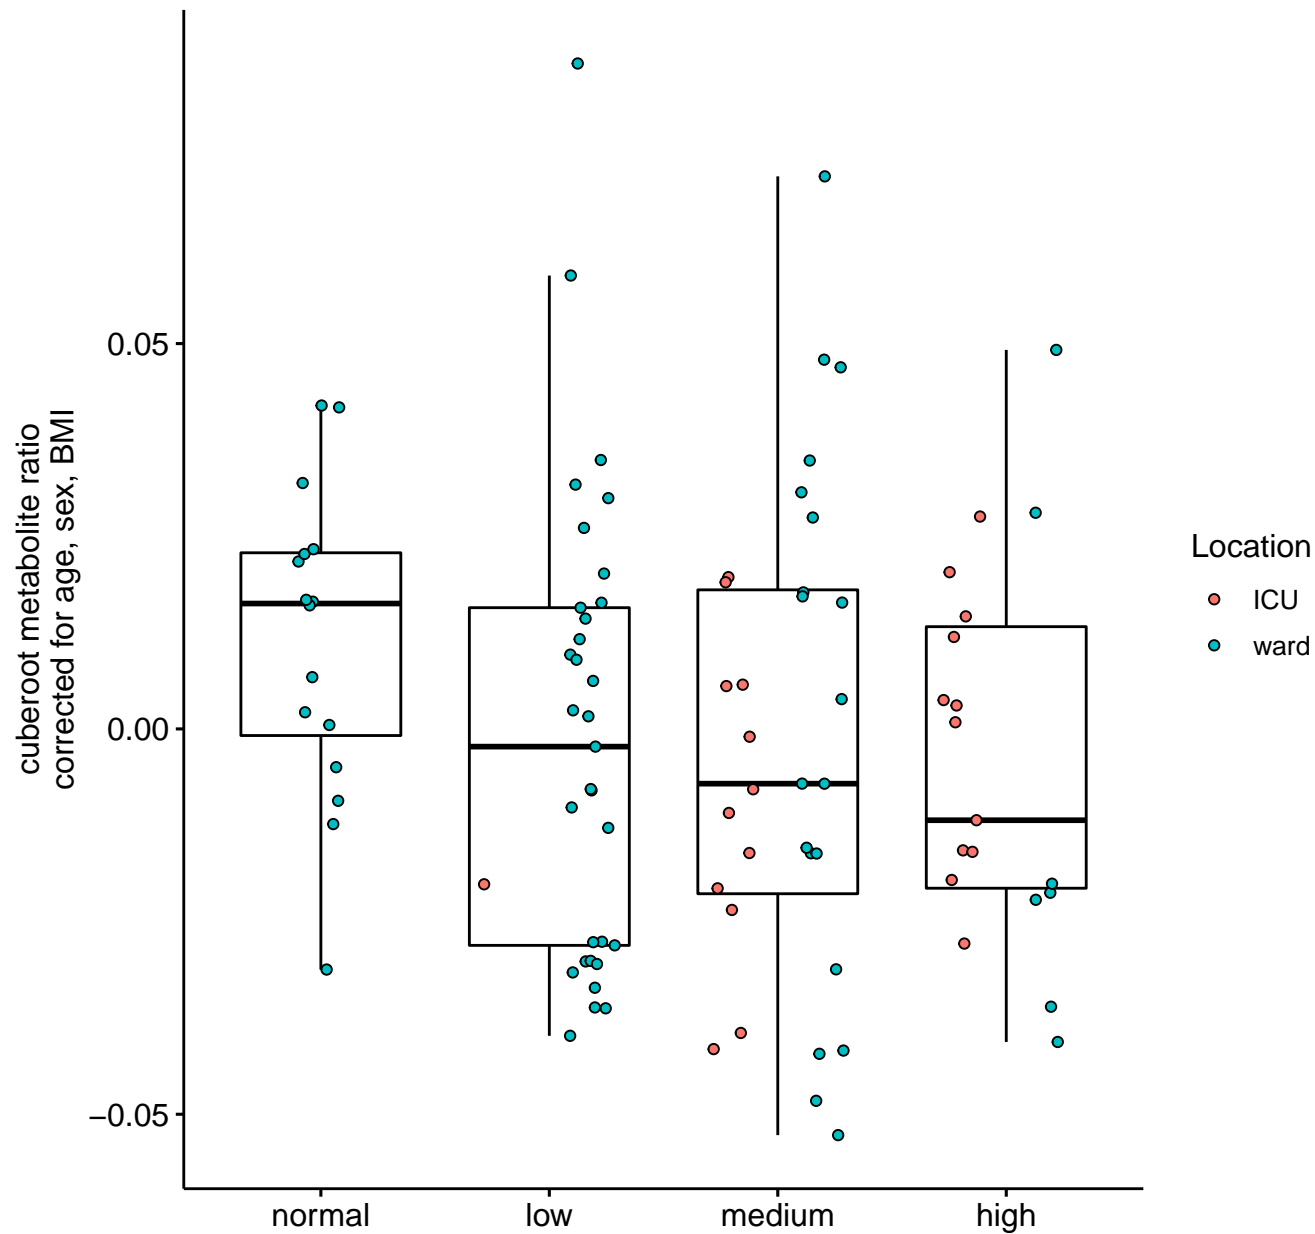



# L.Aspartic.acid\_amines

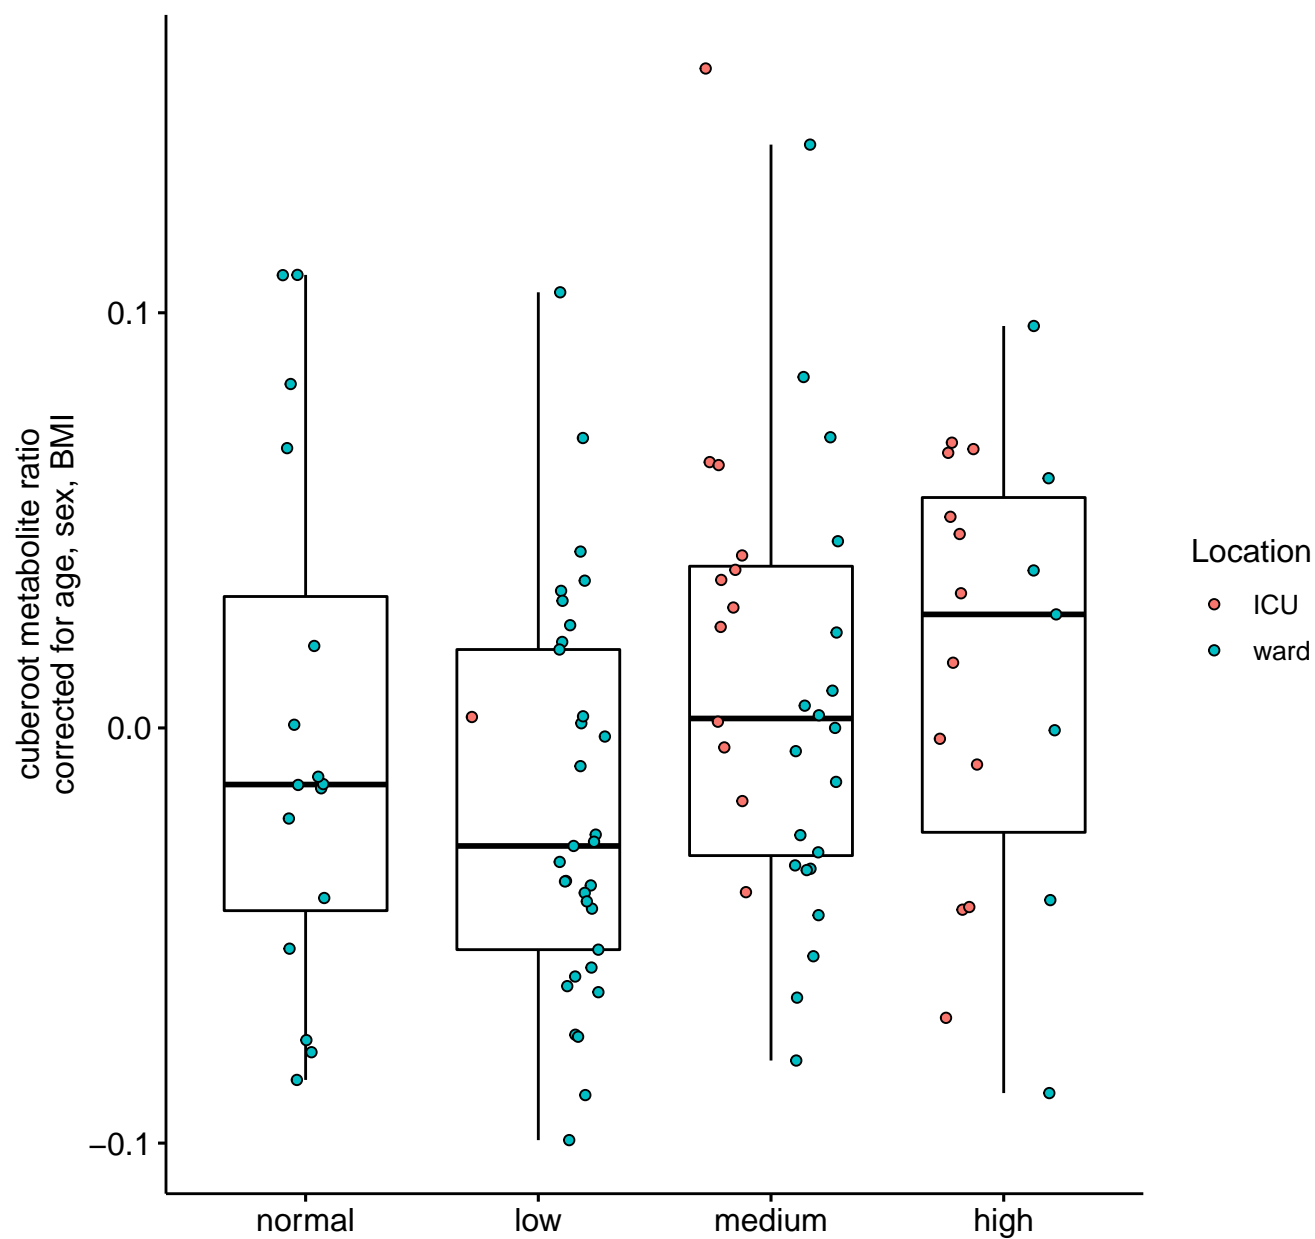

# Monocytes

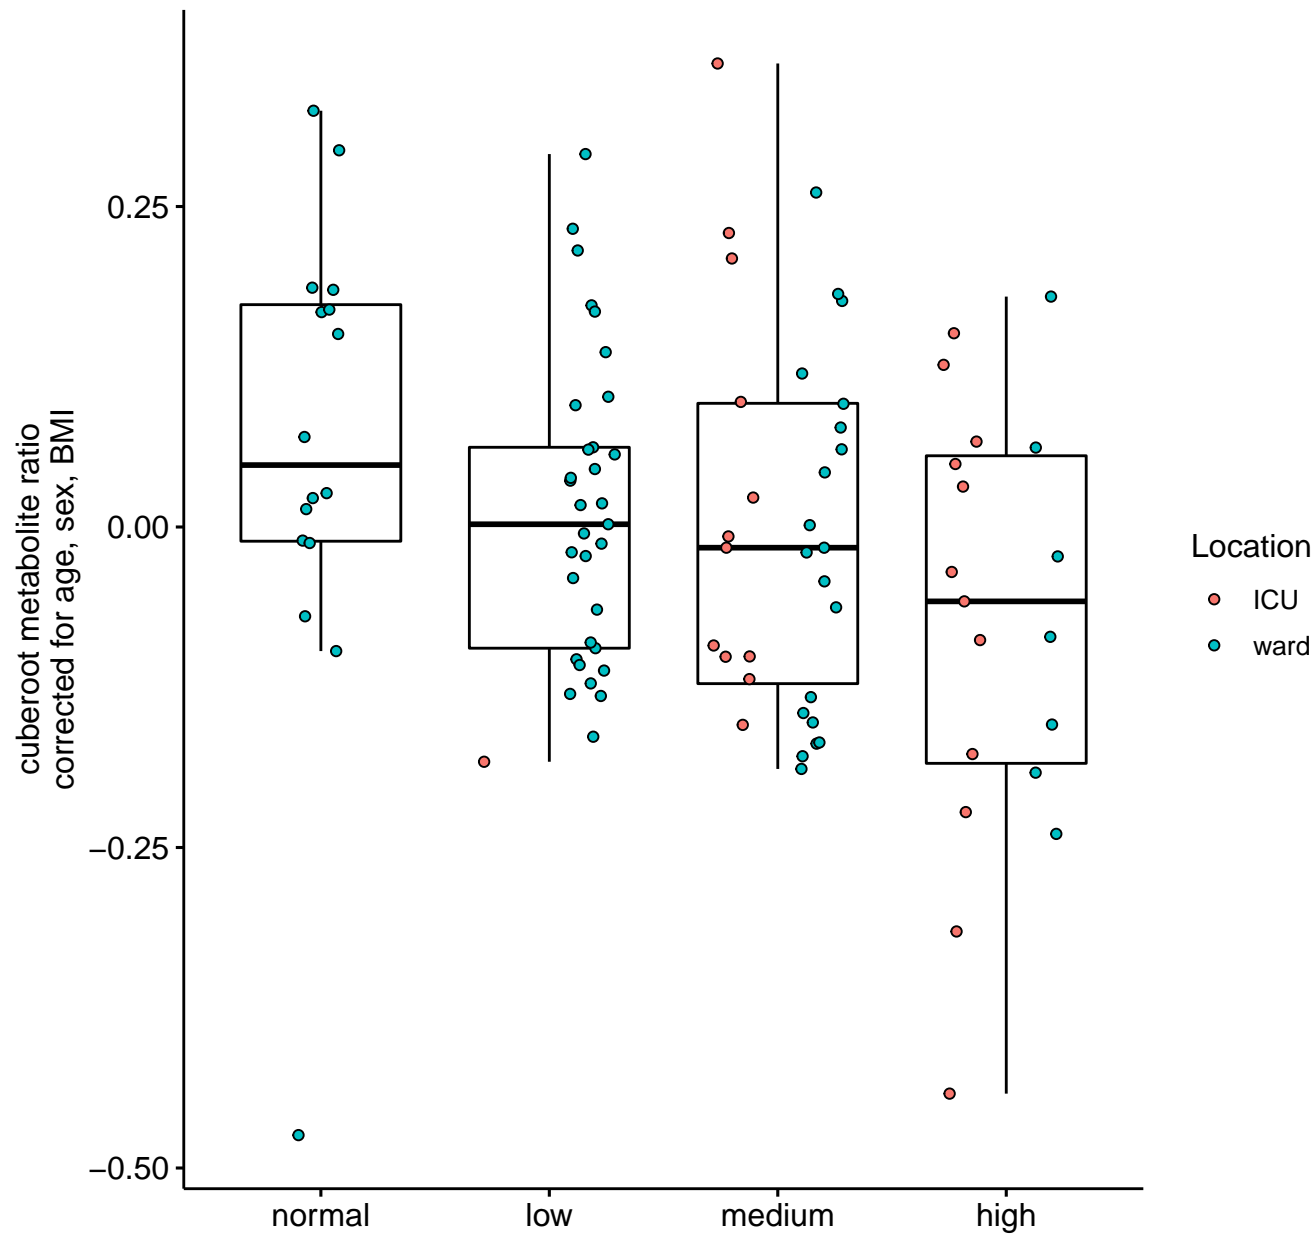

# Taurine\_amines

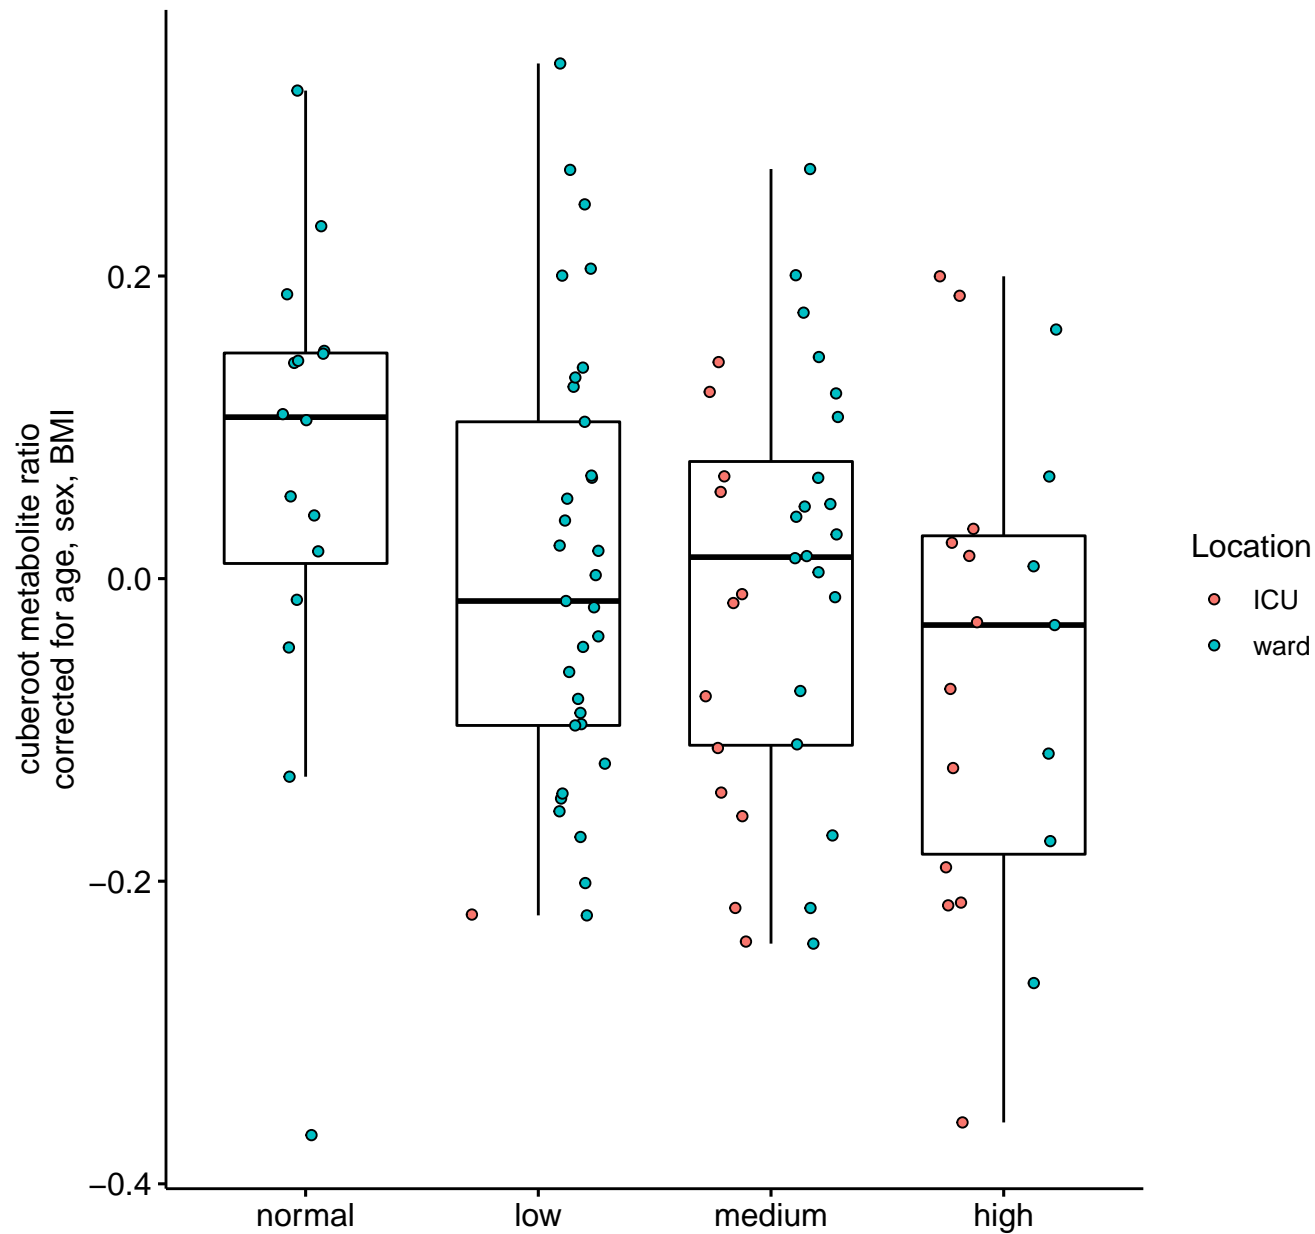

# L.Arginine\_amines

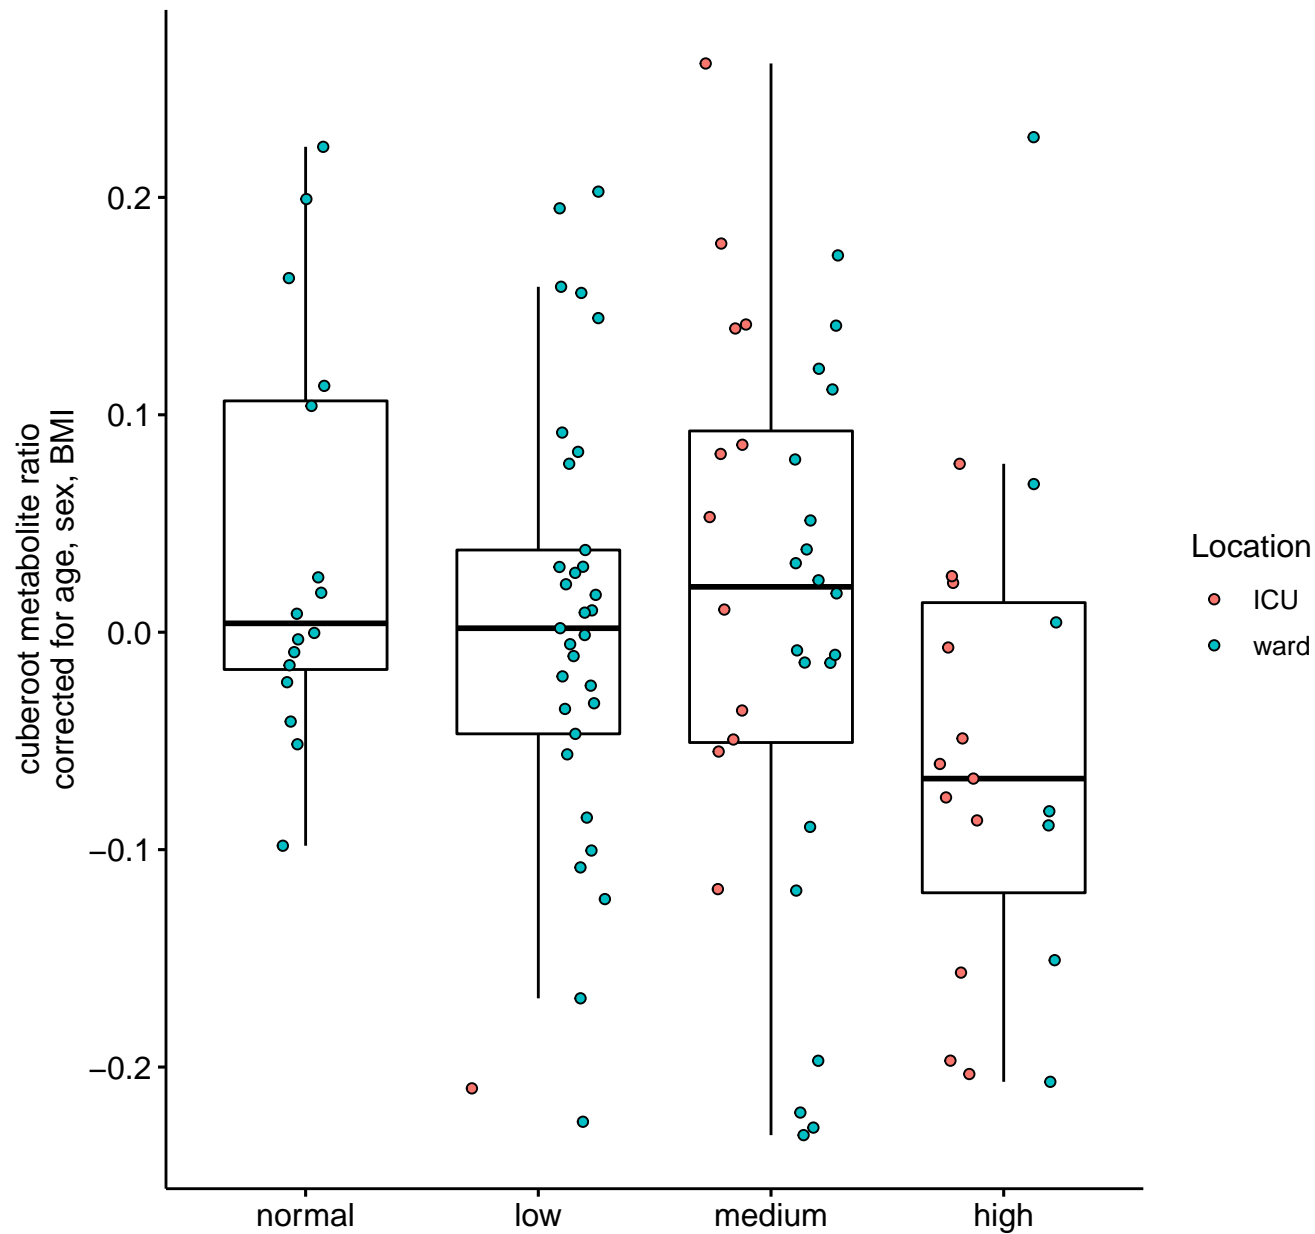

## ADMA\_amines\_wc

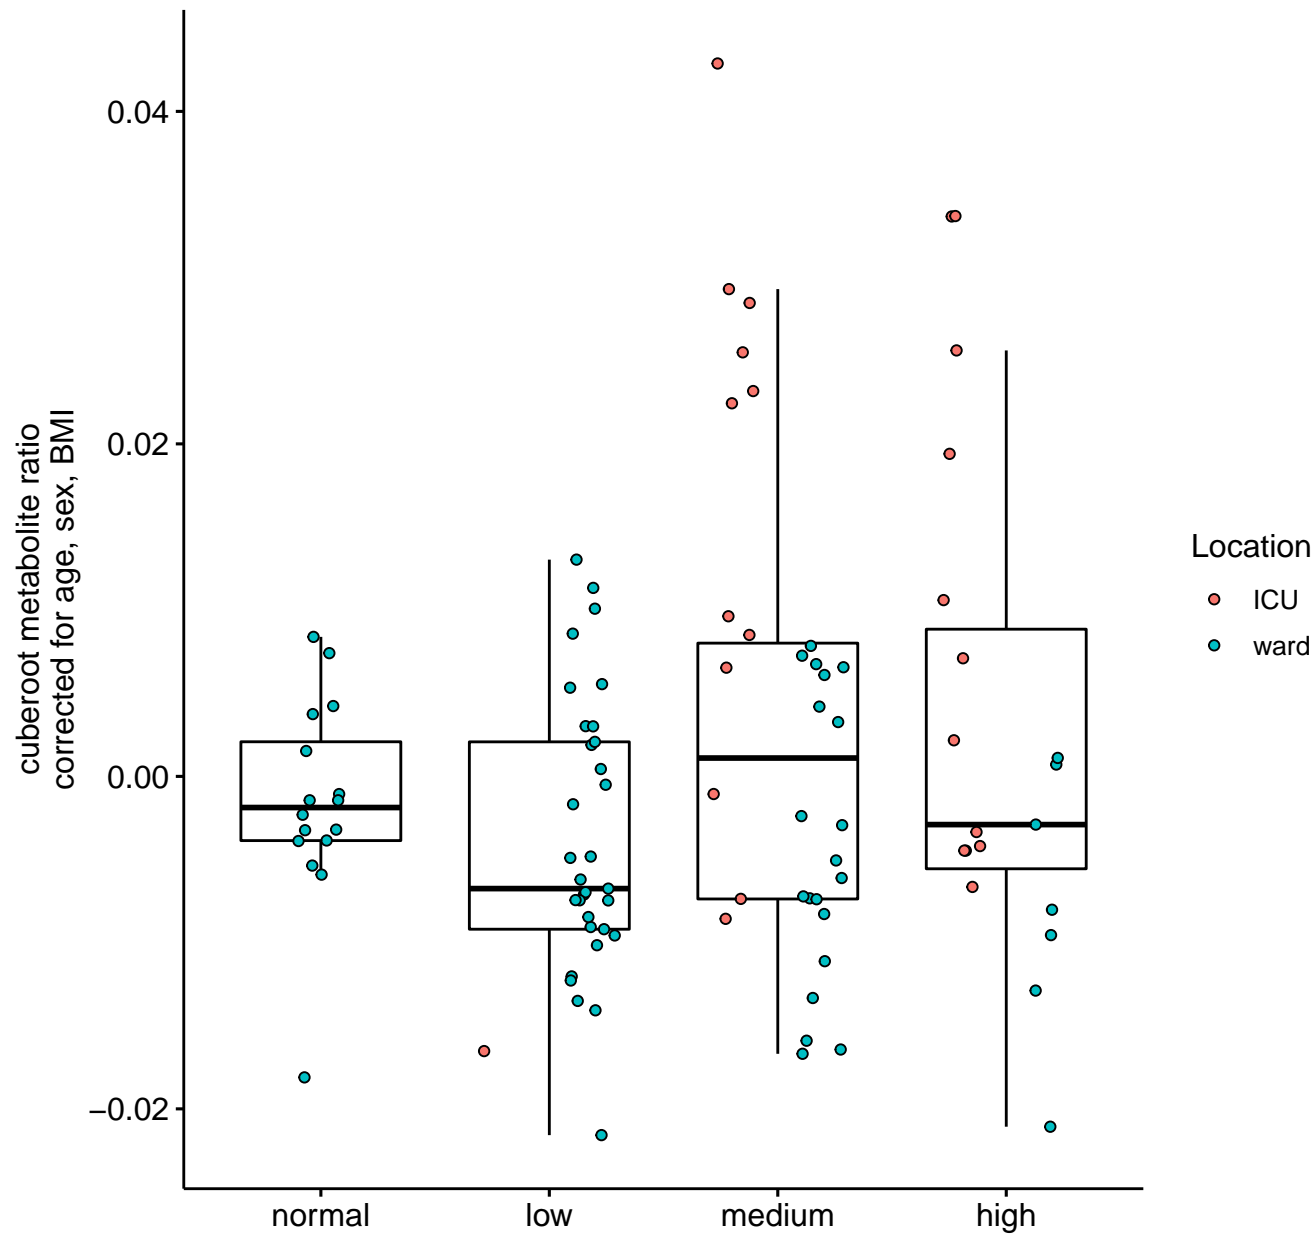

CD4

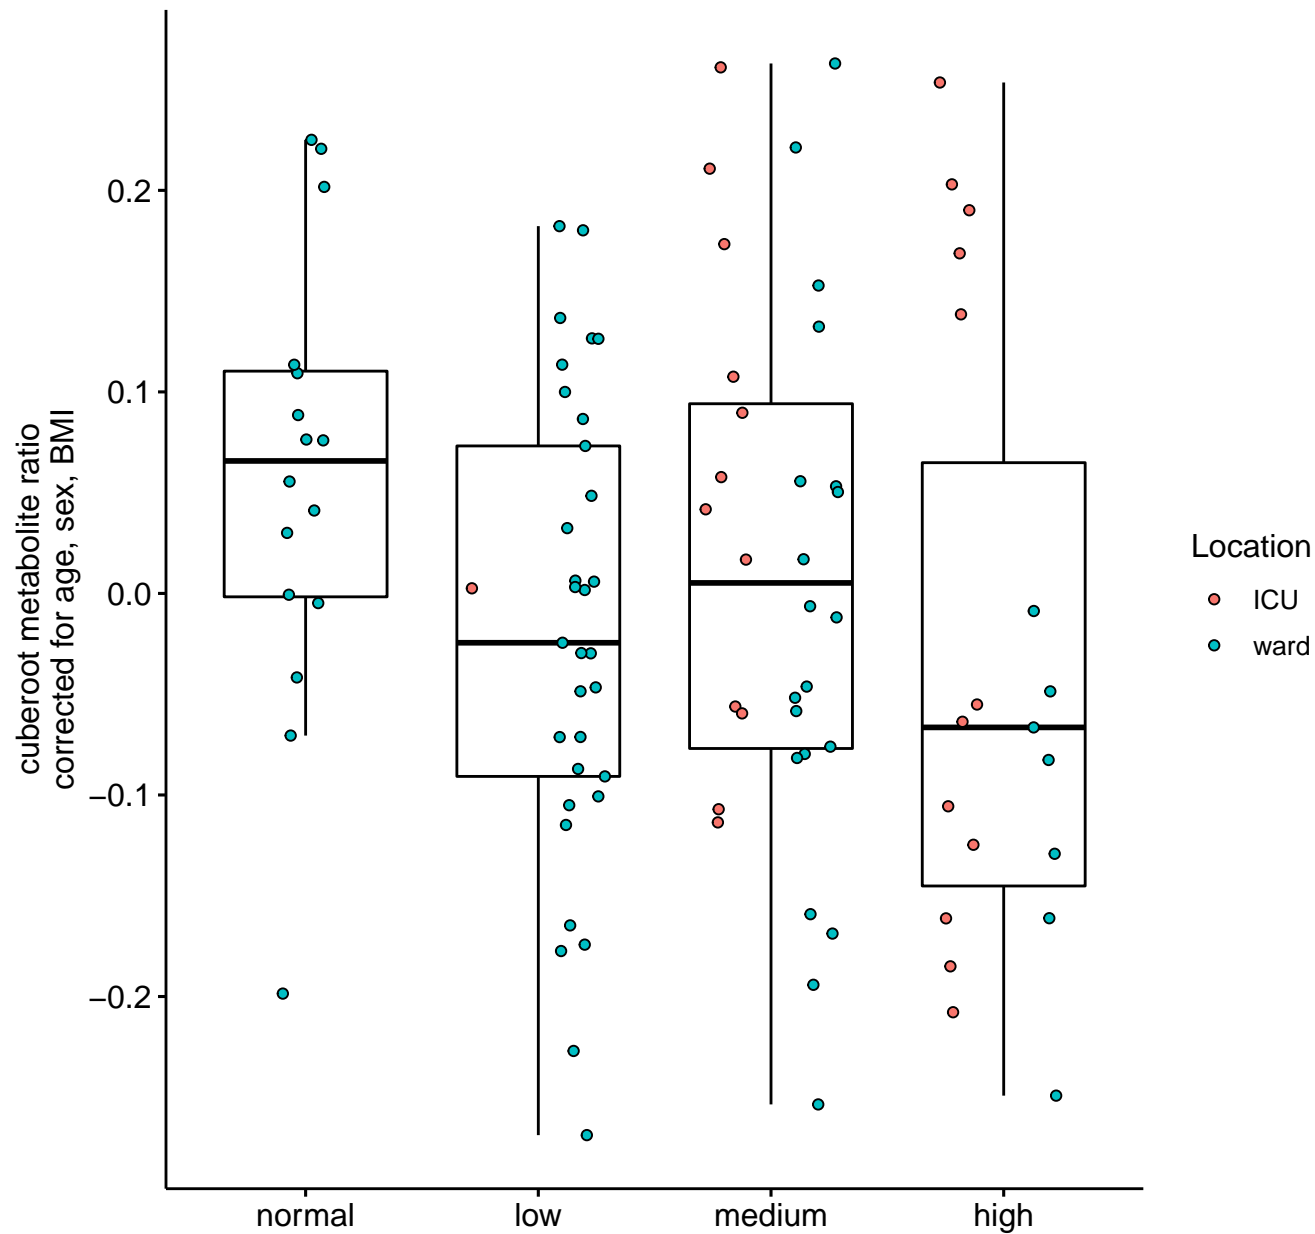

# Homocysteine\_amines\_wc

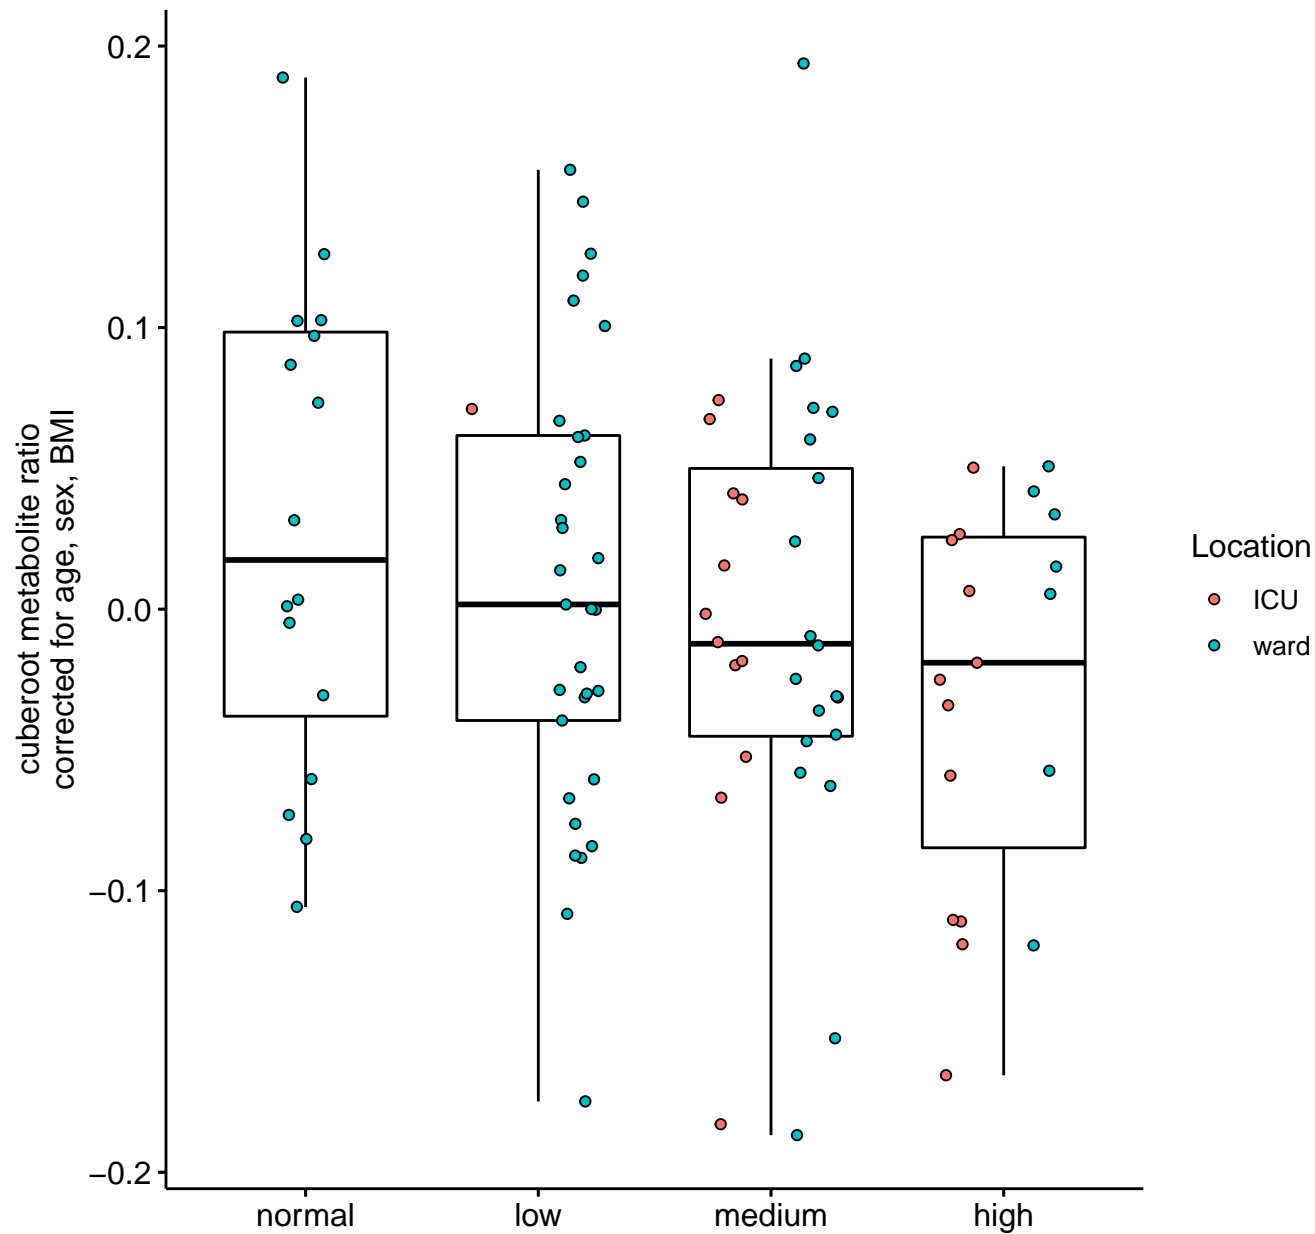

# X3.Methoxytyramine\_amines\_wc

cuberoot metabolite ratio  
corrected for age, sex, BMI

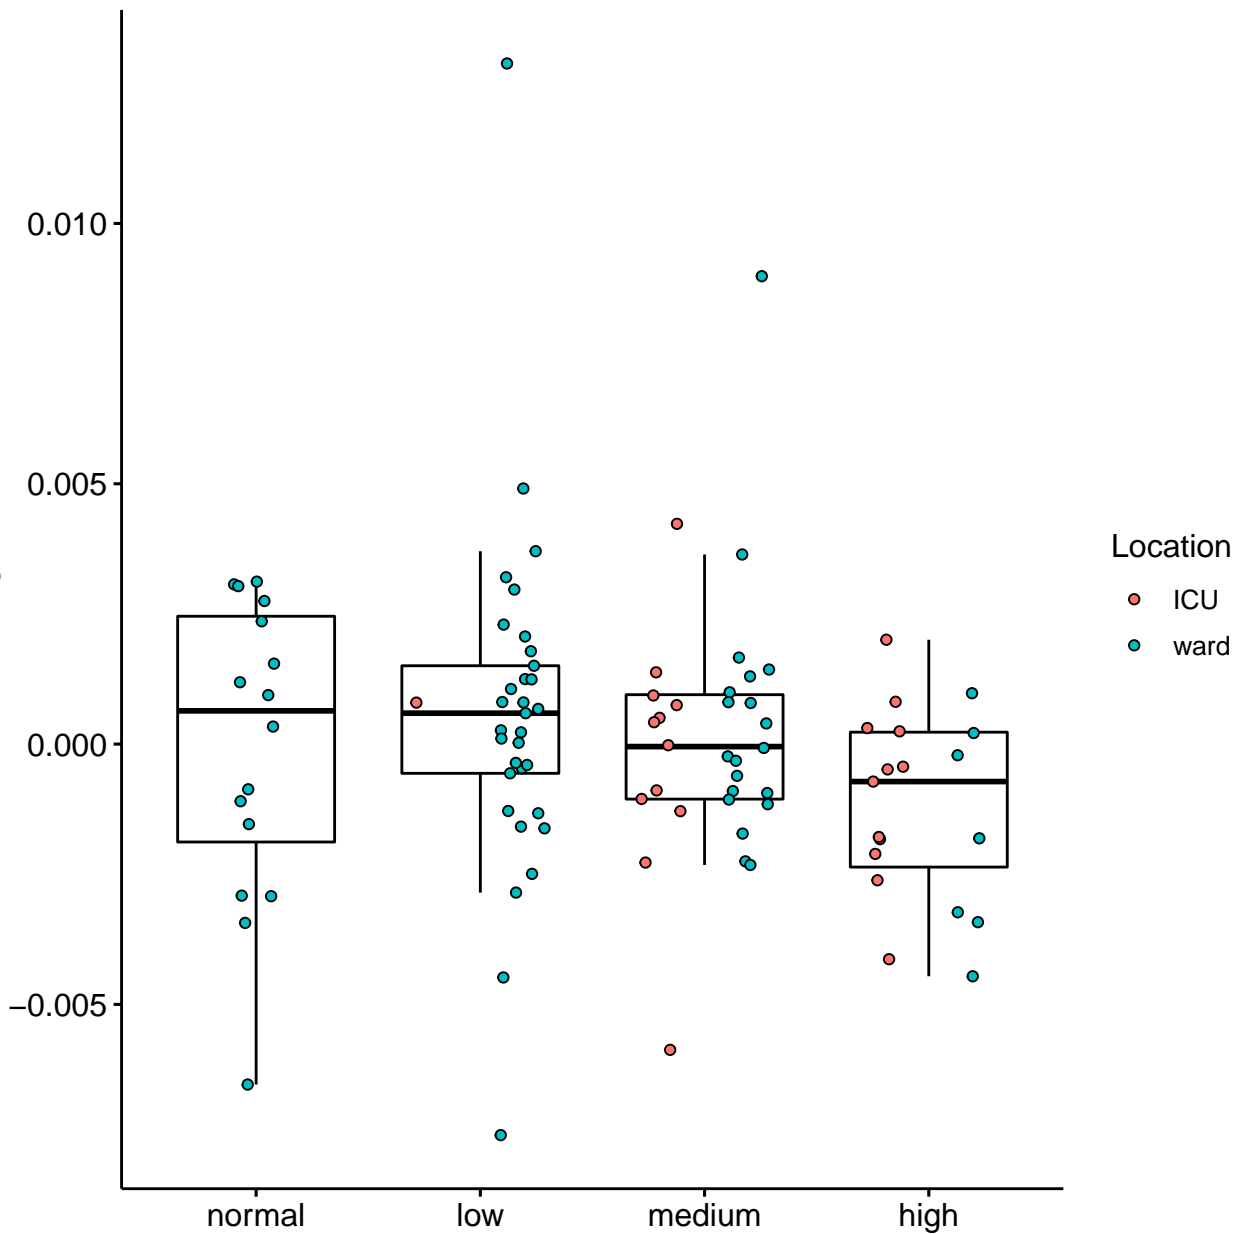



GCSF

cube root metabolite ratio  
corrected for age, sex, BMI

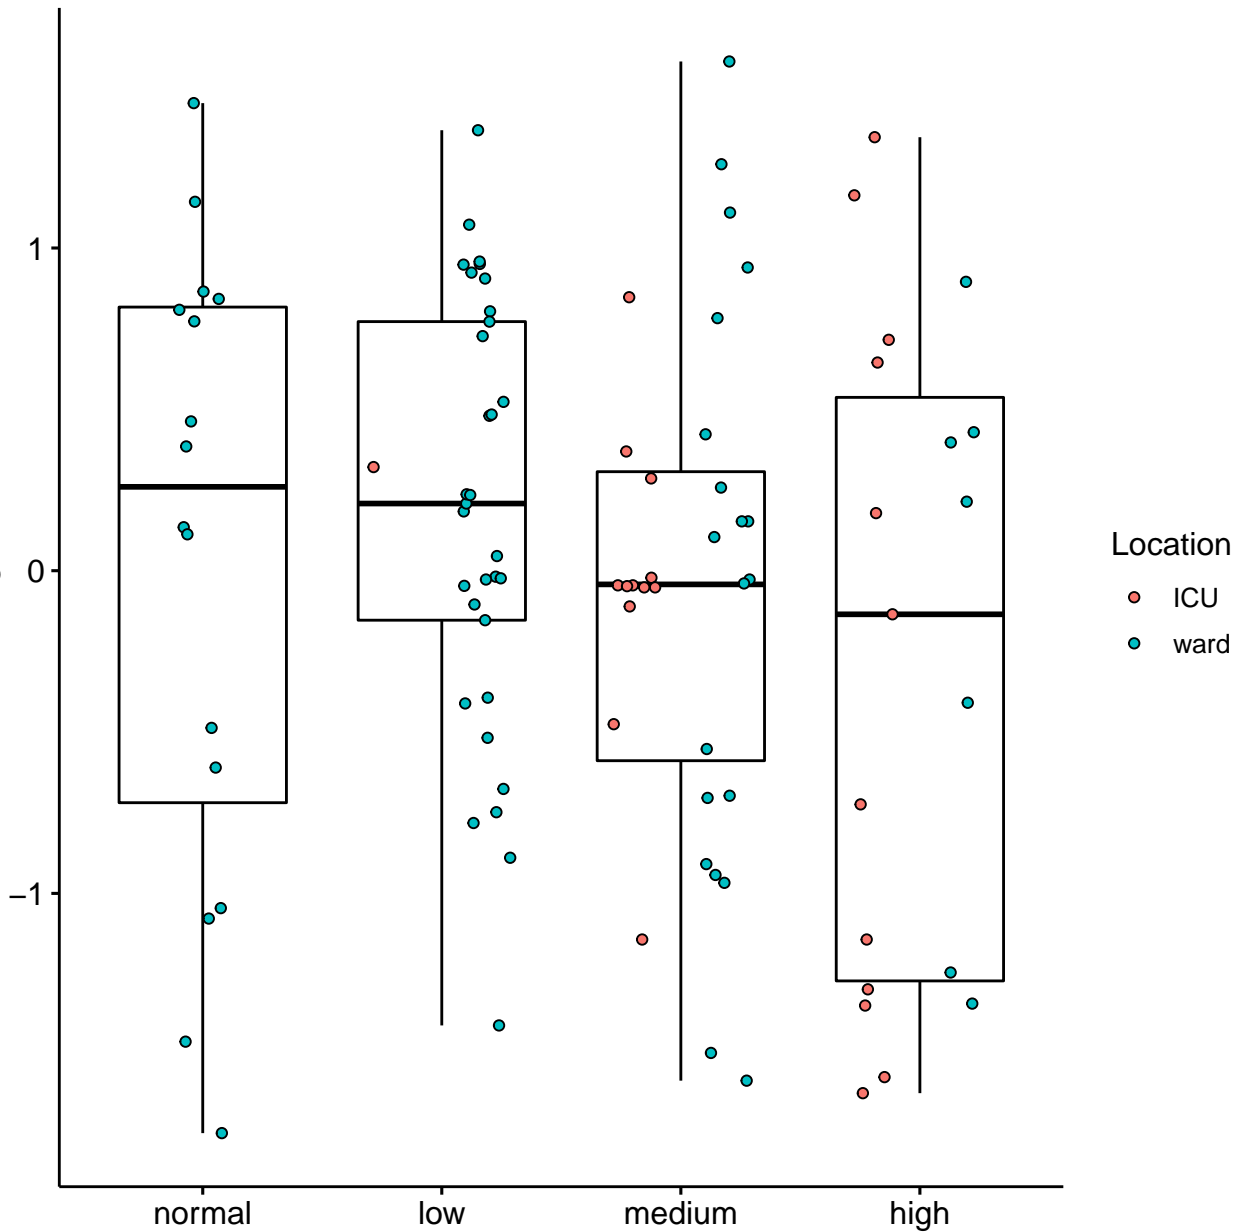

# Ornithine\_amines

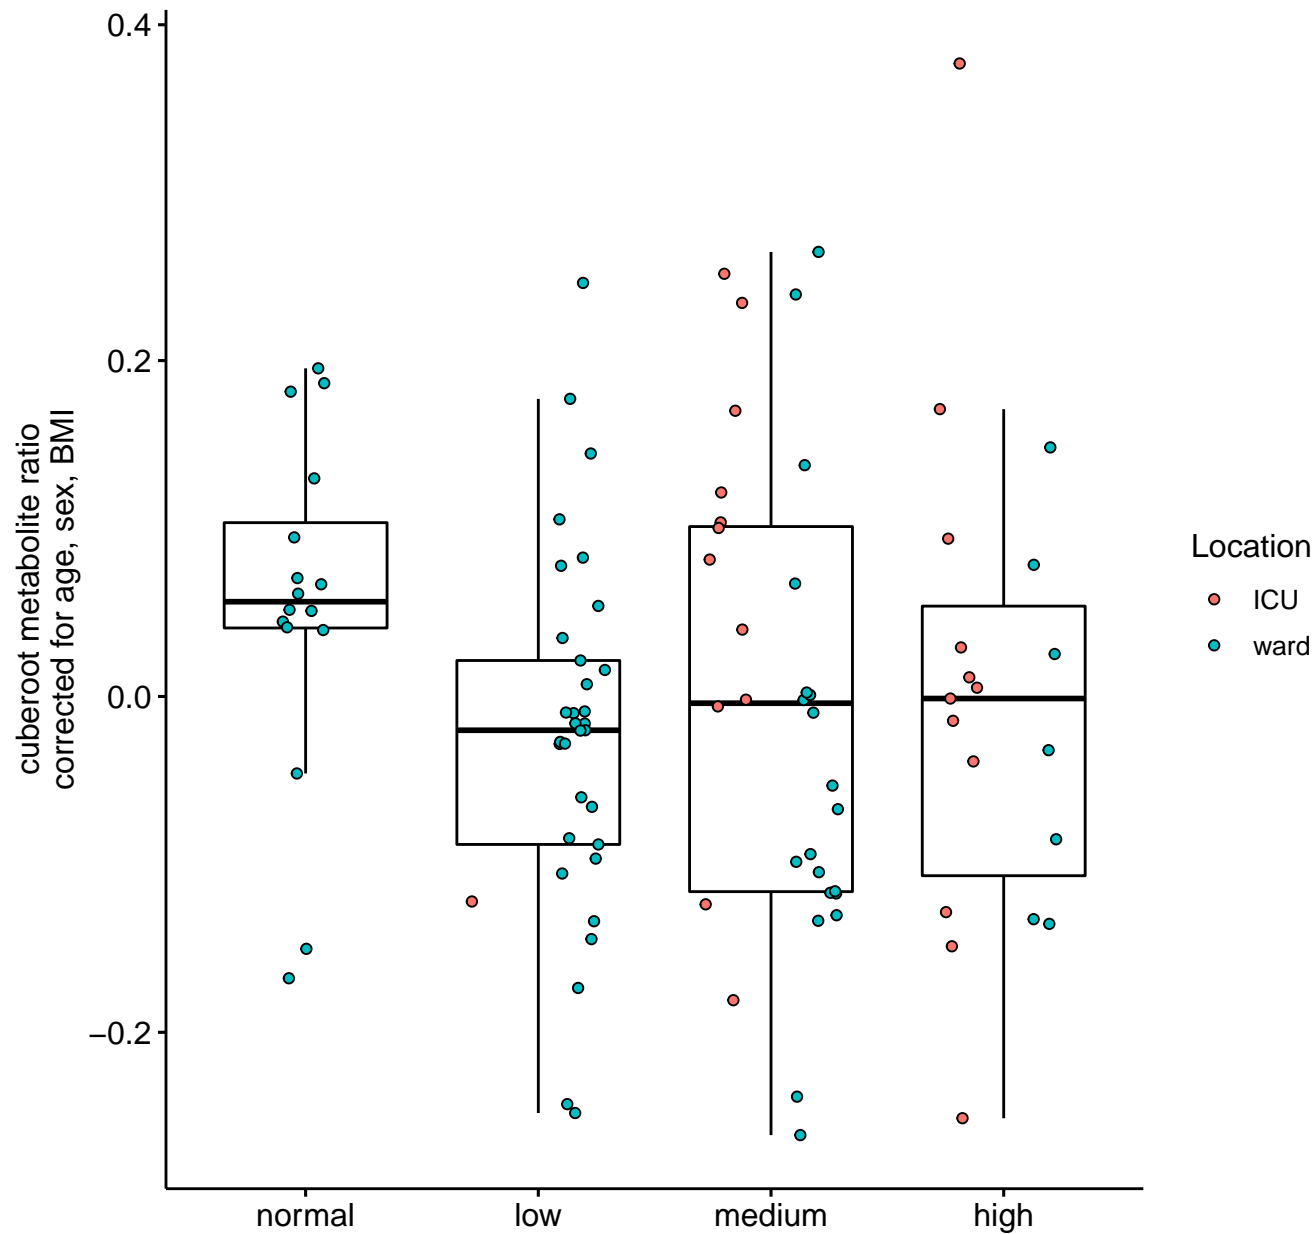

# Ethanolamine\_amines

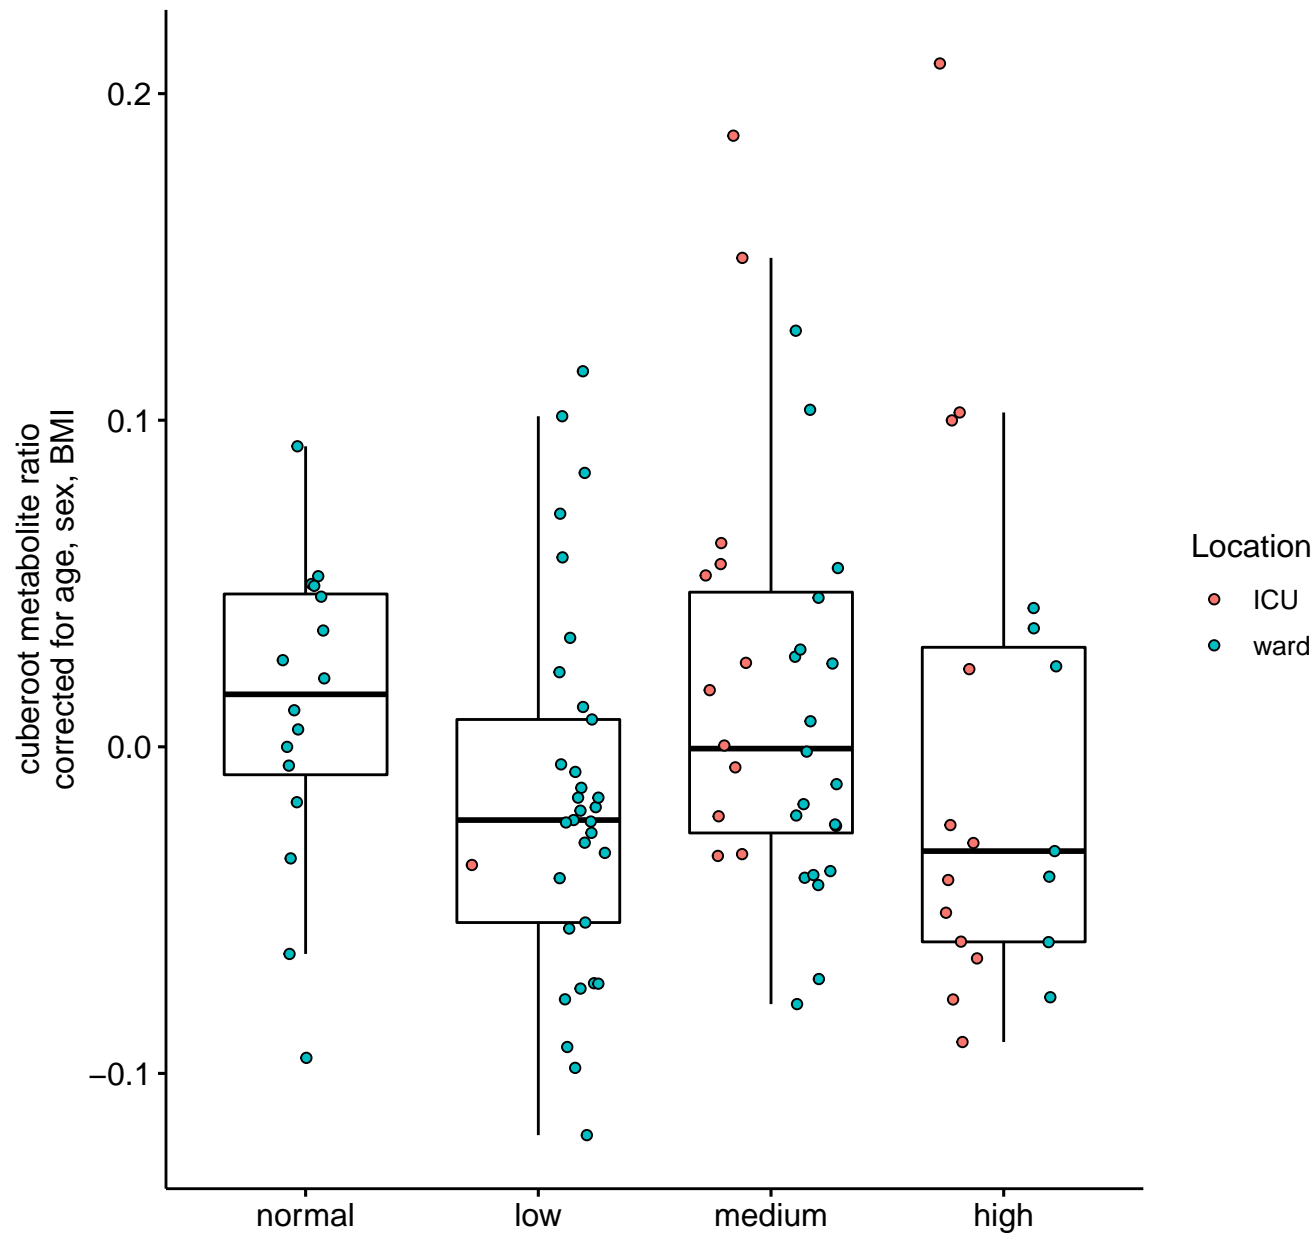

IL1beta

cube root metabolite ratio  
corrected for age, sex, BMI

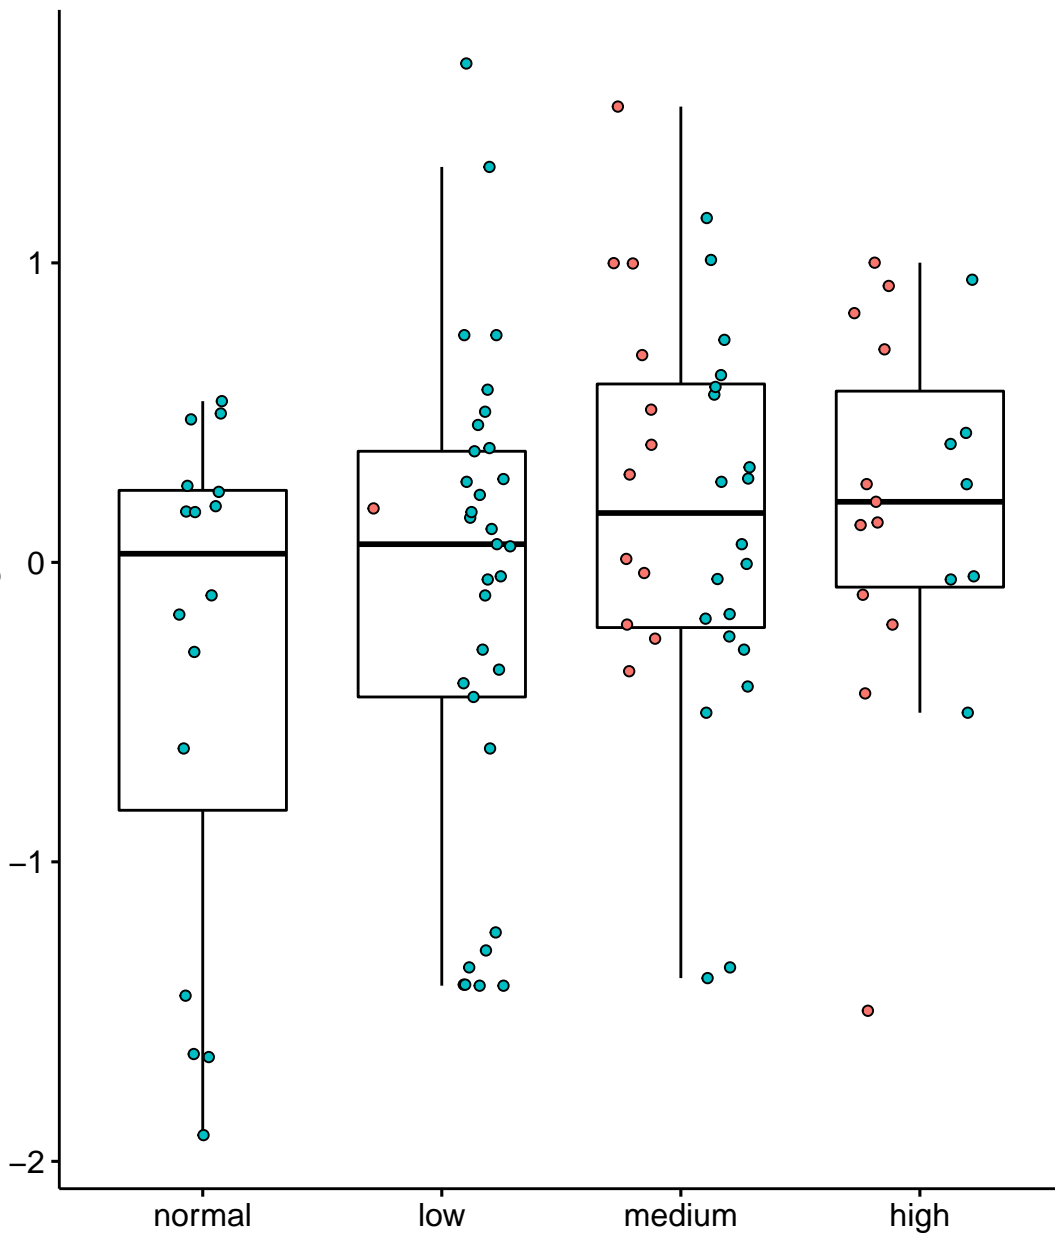

NK\_cells

cube root metabolite ratio  
corrected for age, sex, BMI

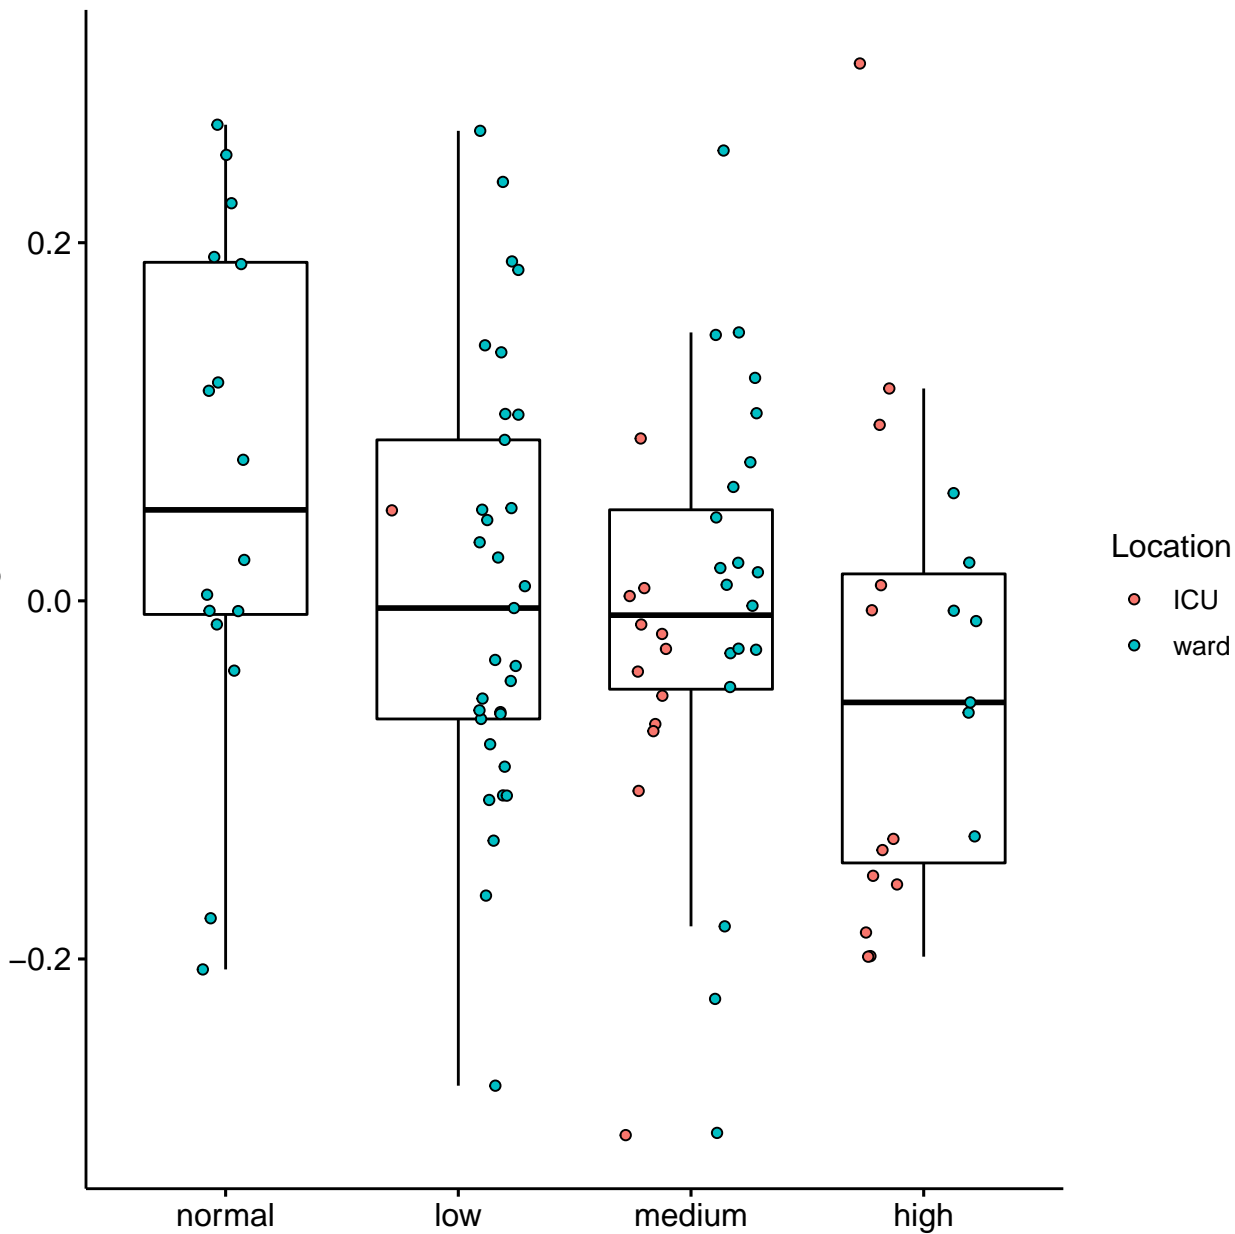

Non\_T

cube root metabolite ratio  
corrected for age, sex, BMI

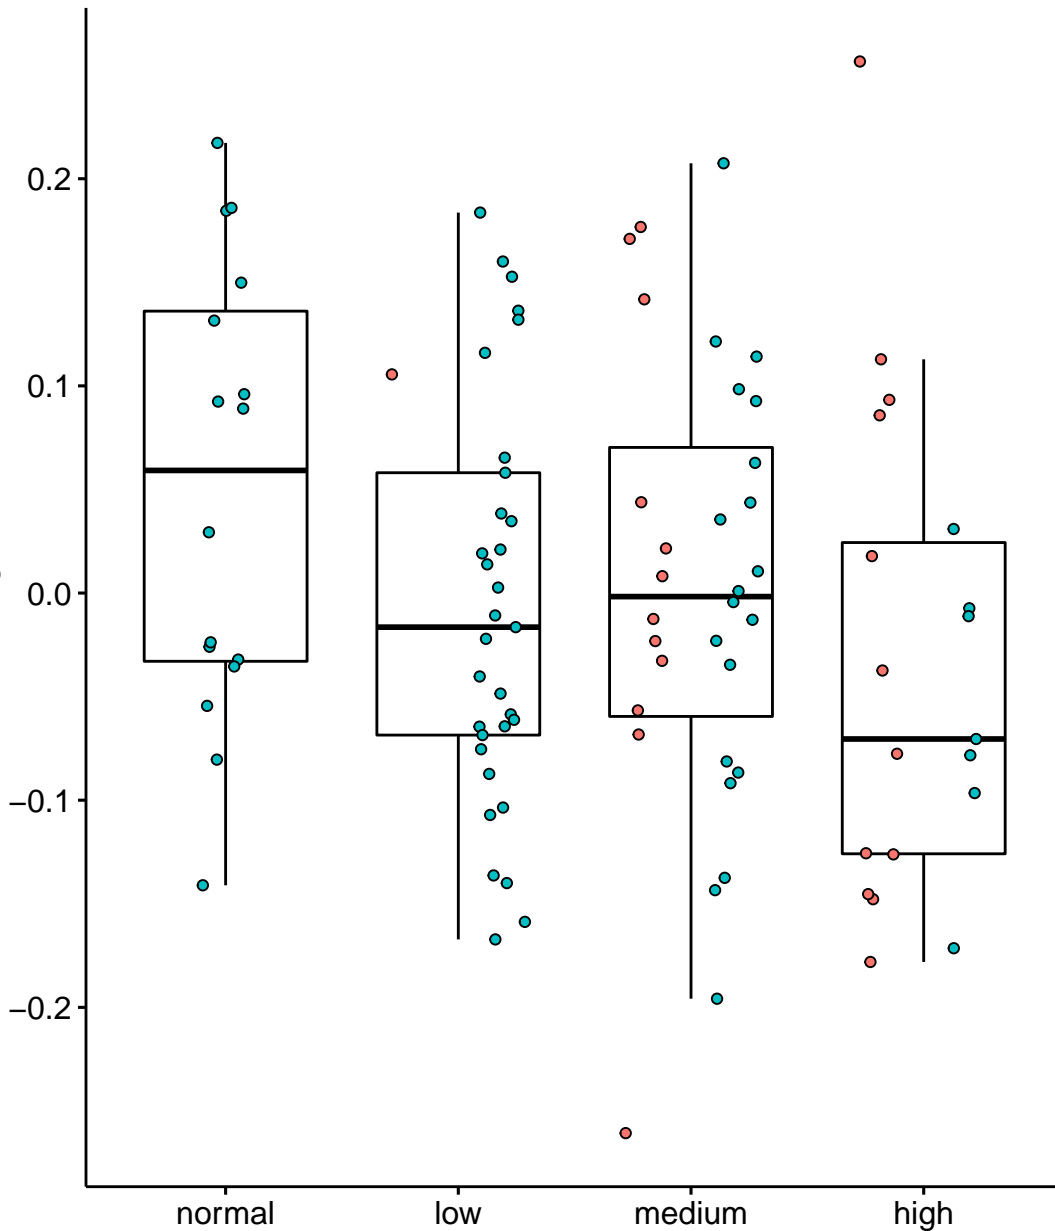

Location

ICU  
ward

CCL17

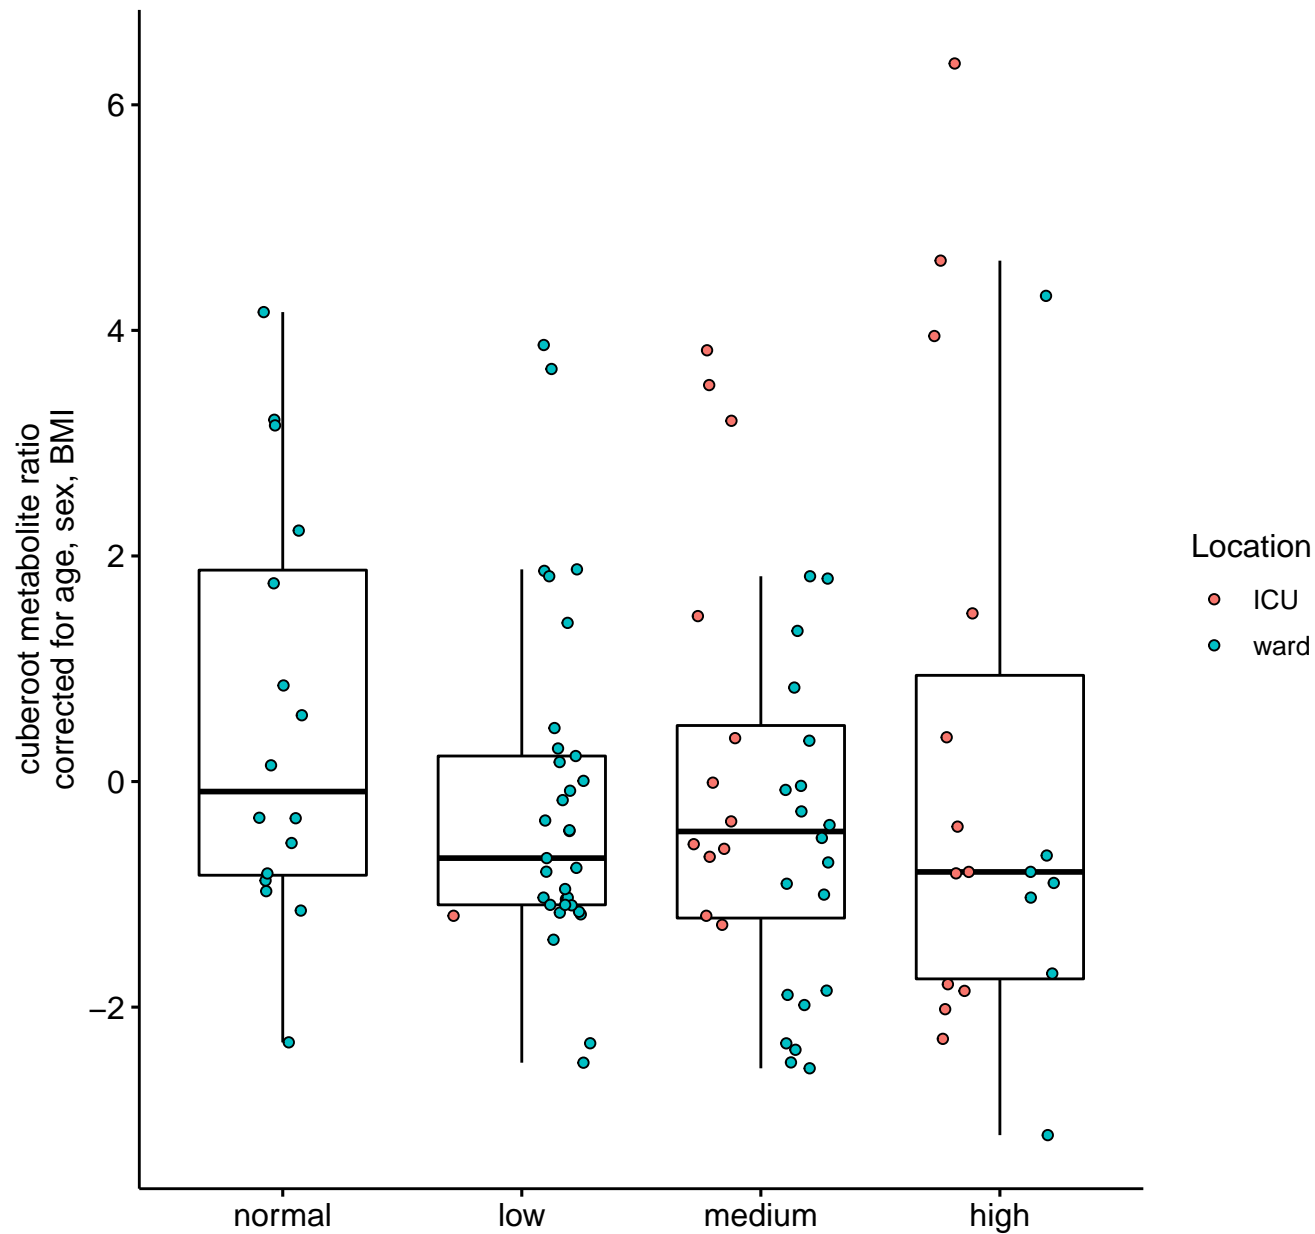

# Putrescine\_amines

cube root metabolite ratio  
corrected for age, sex, BMI

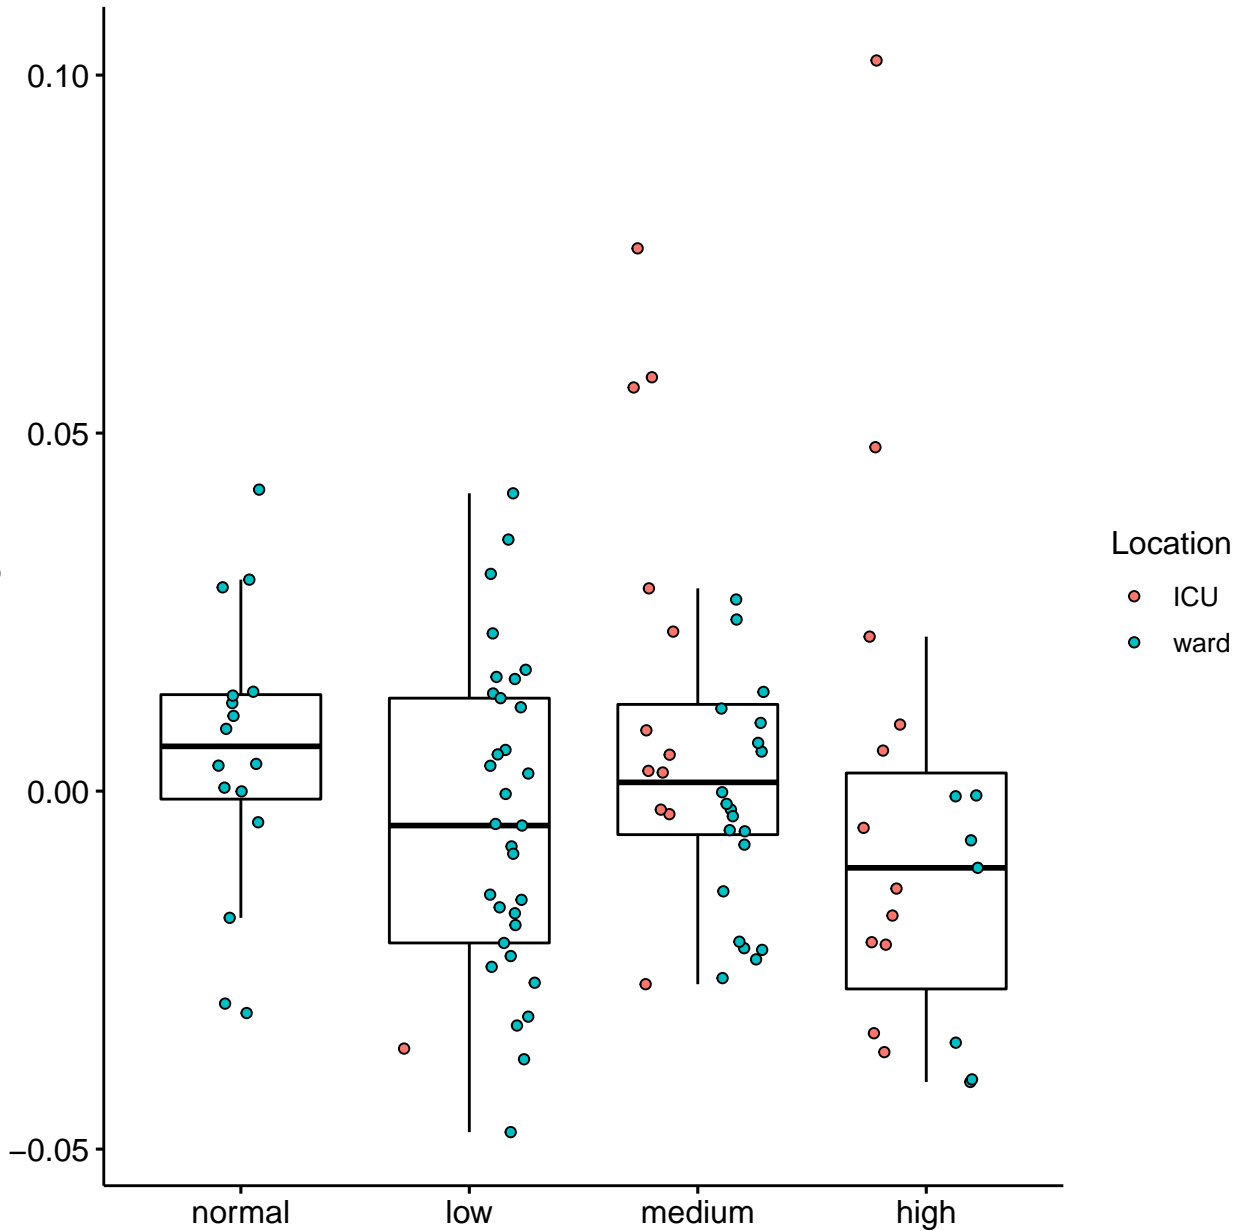



# O.Phosphoethanolamine\_amines

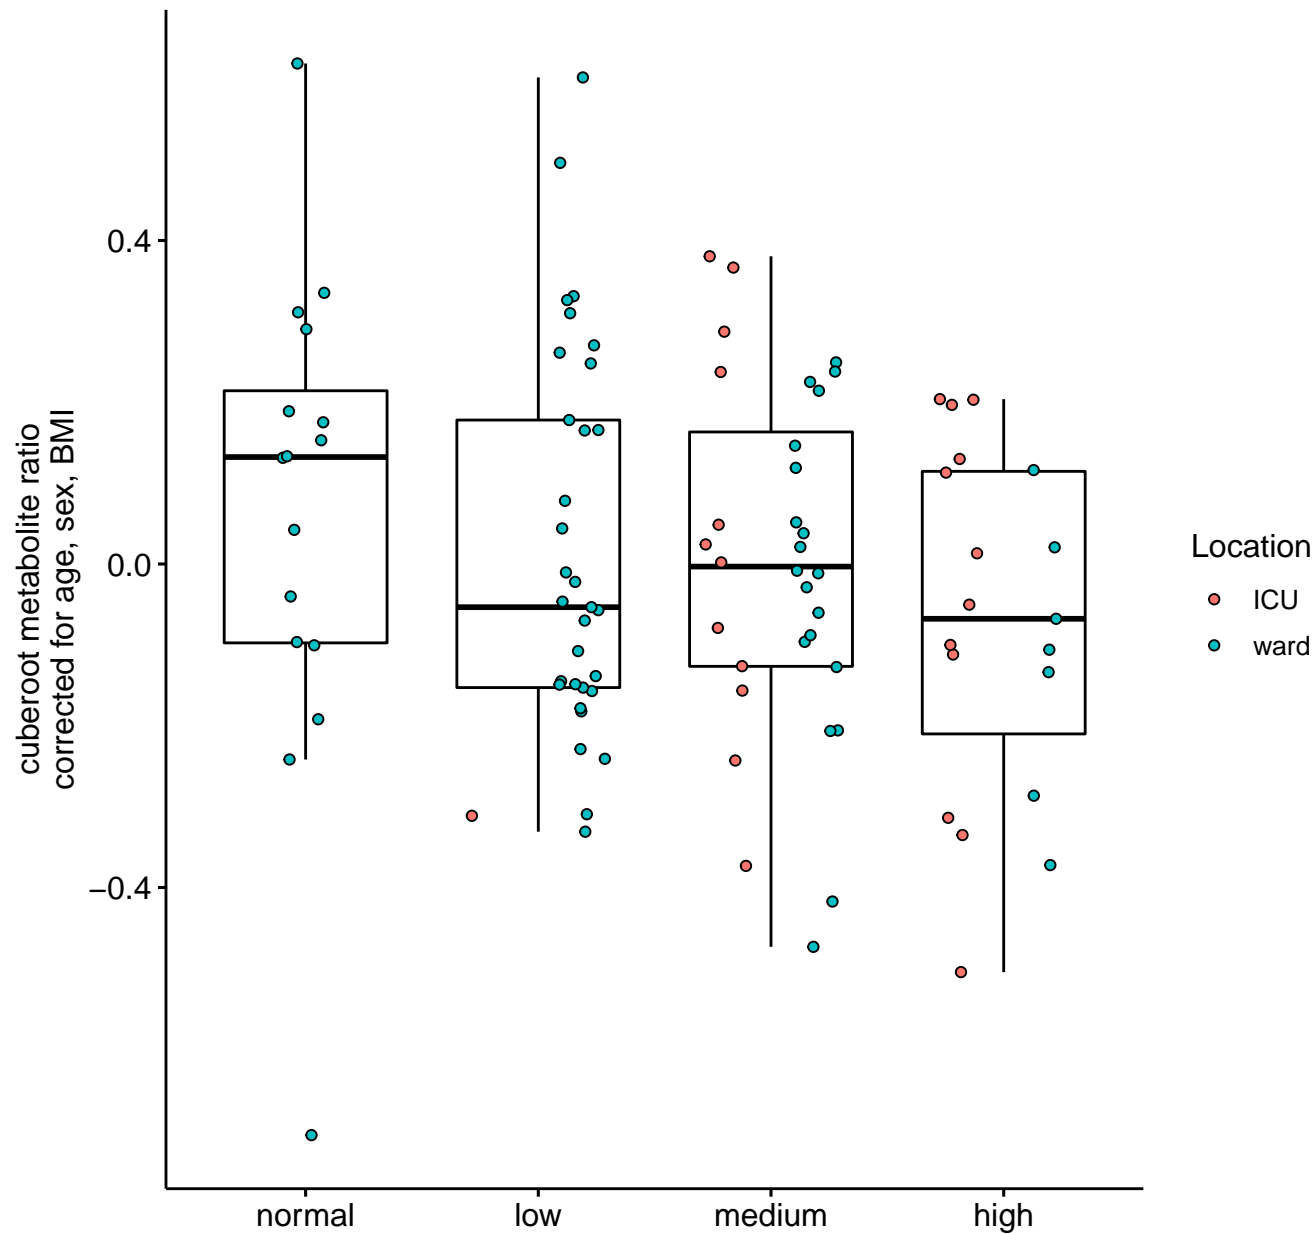

## SDMA\_amines\_wc

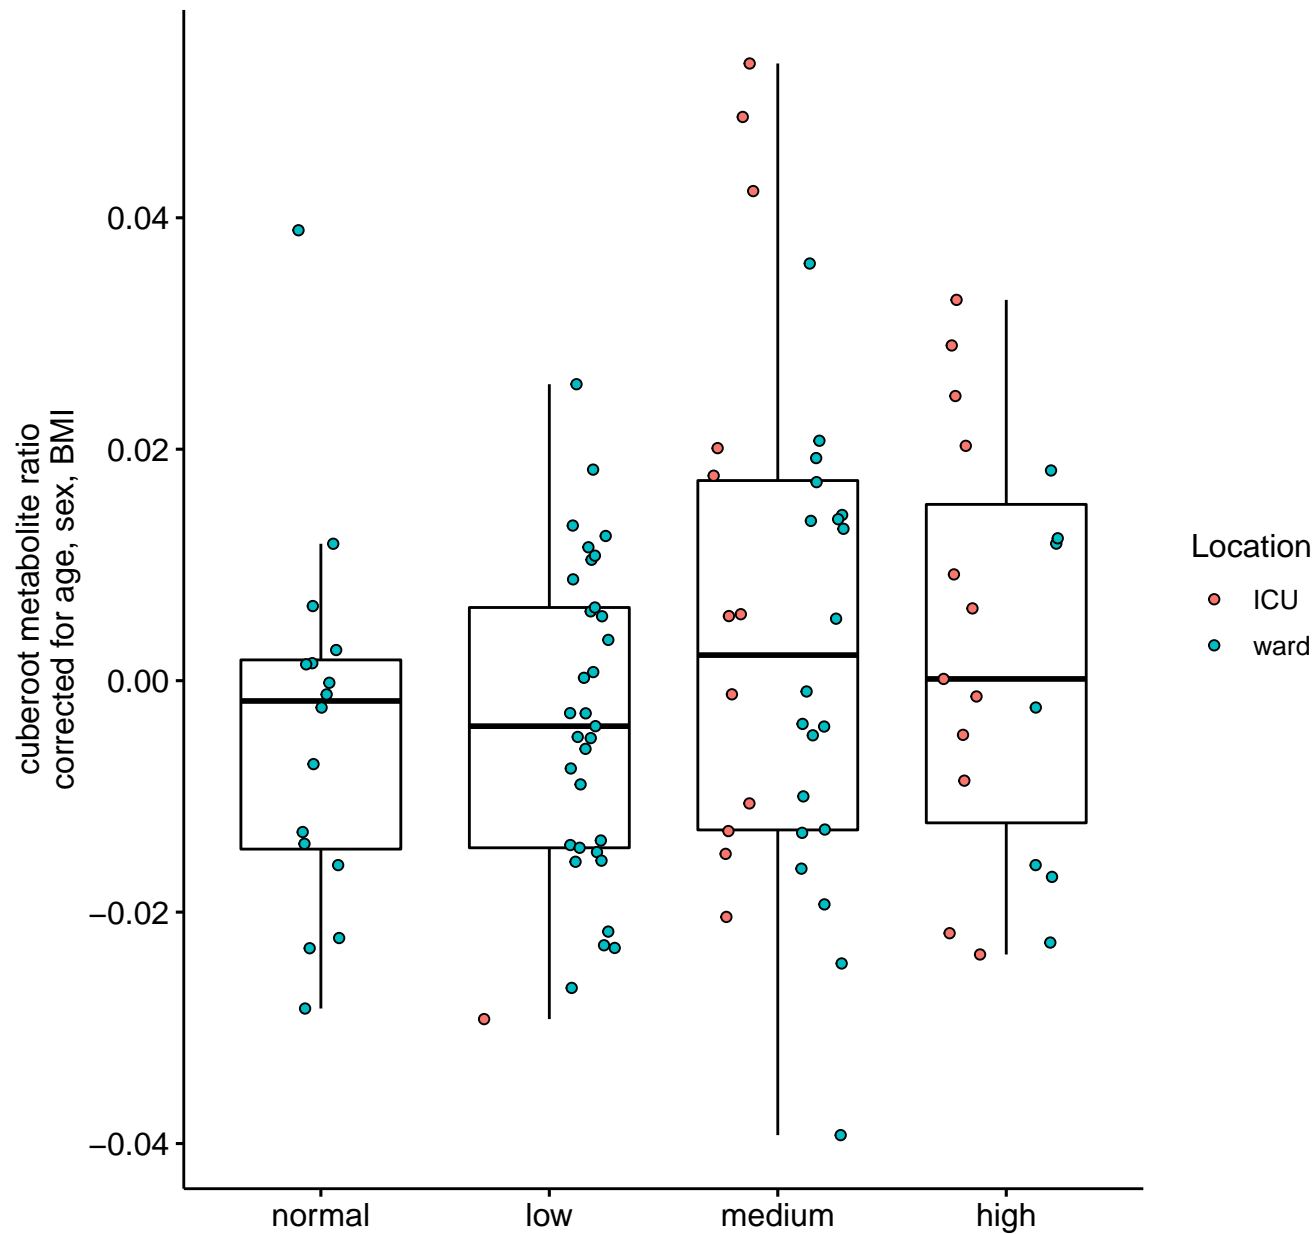

# L.Methionine\_amines

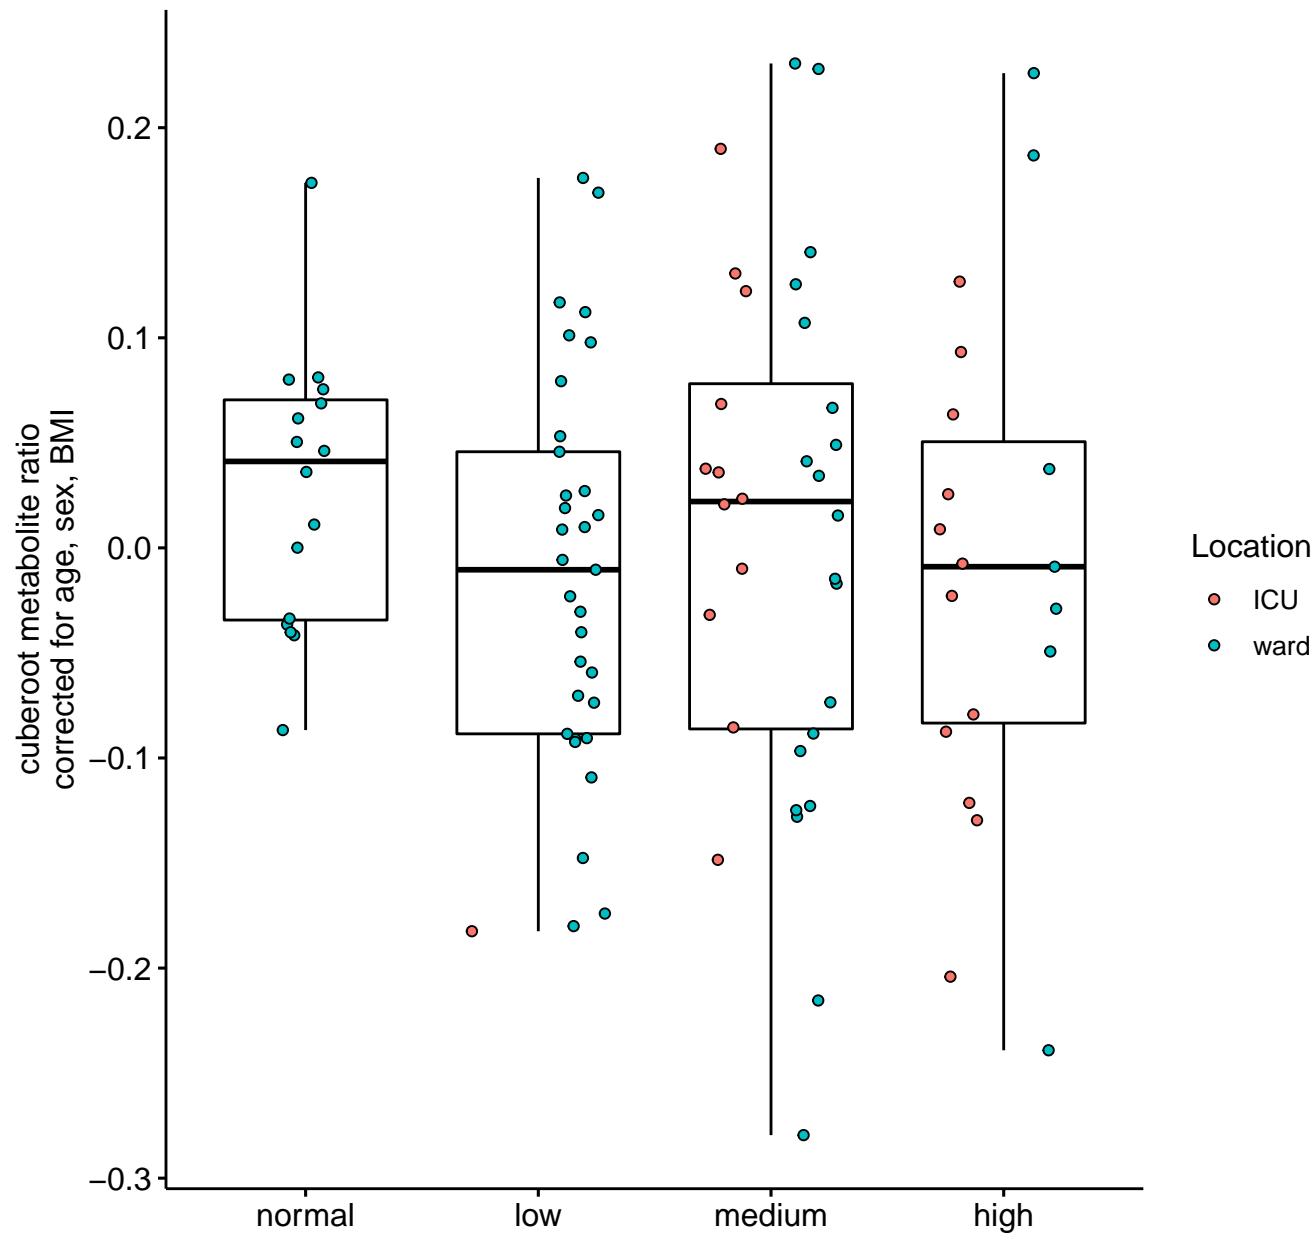

# FASL

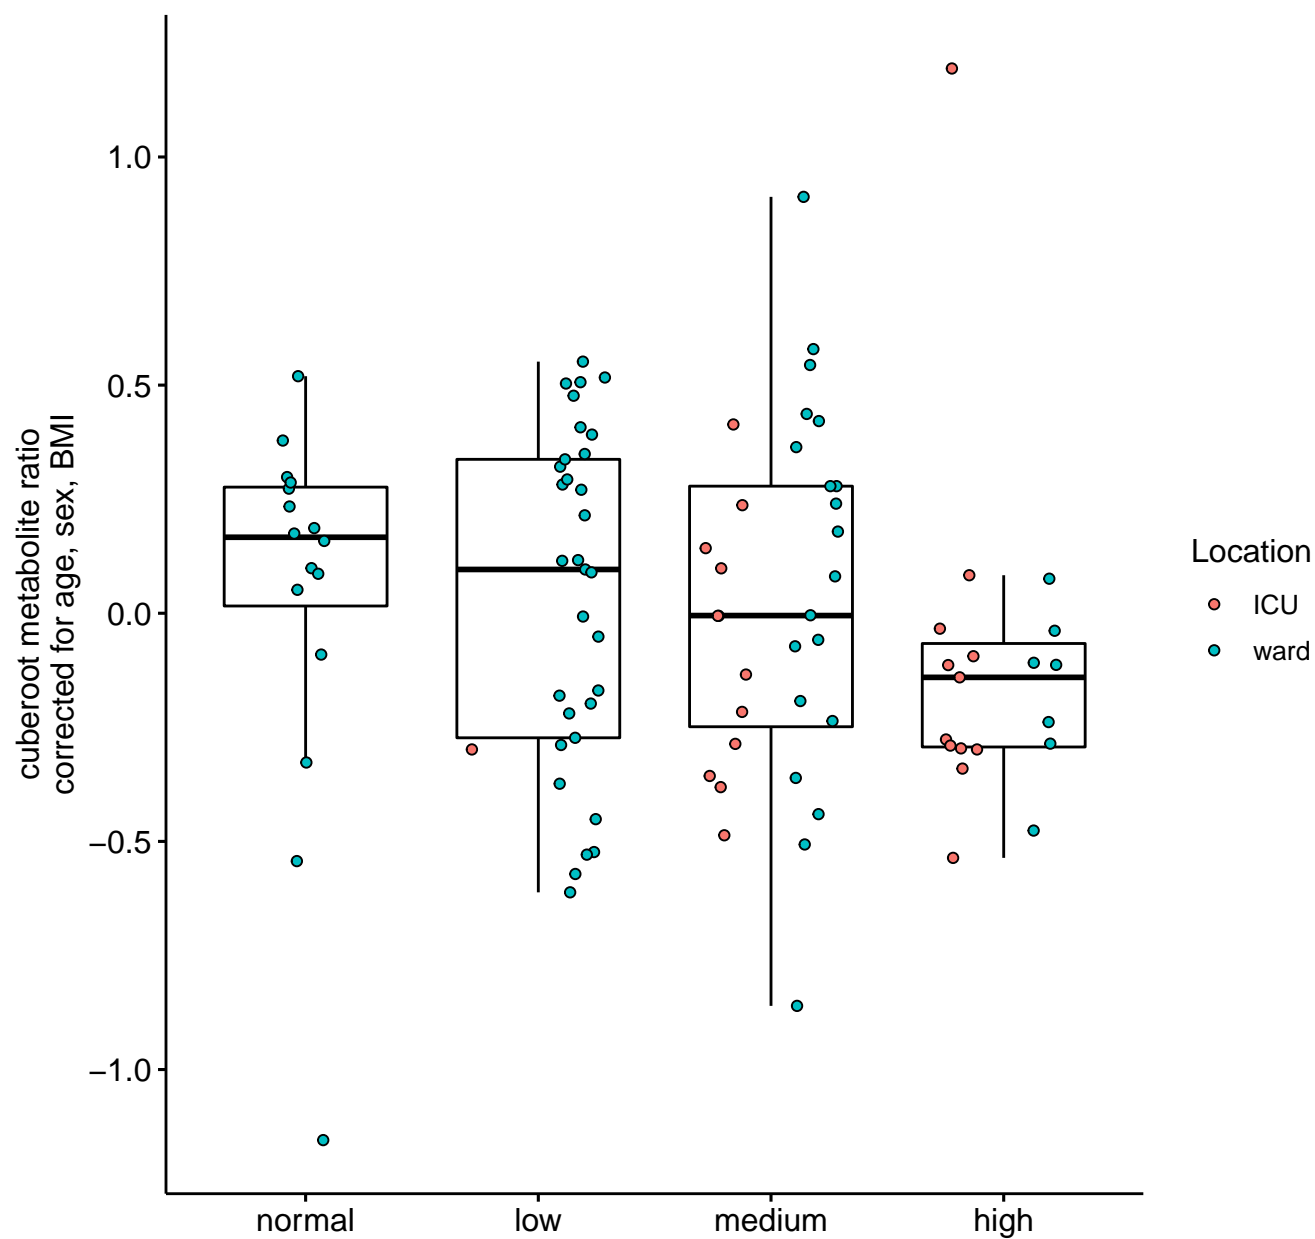

# Sarcosine\_amines

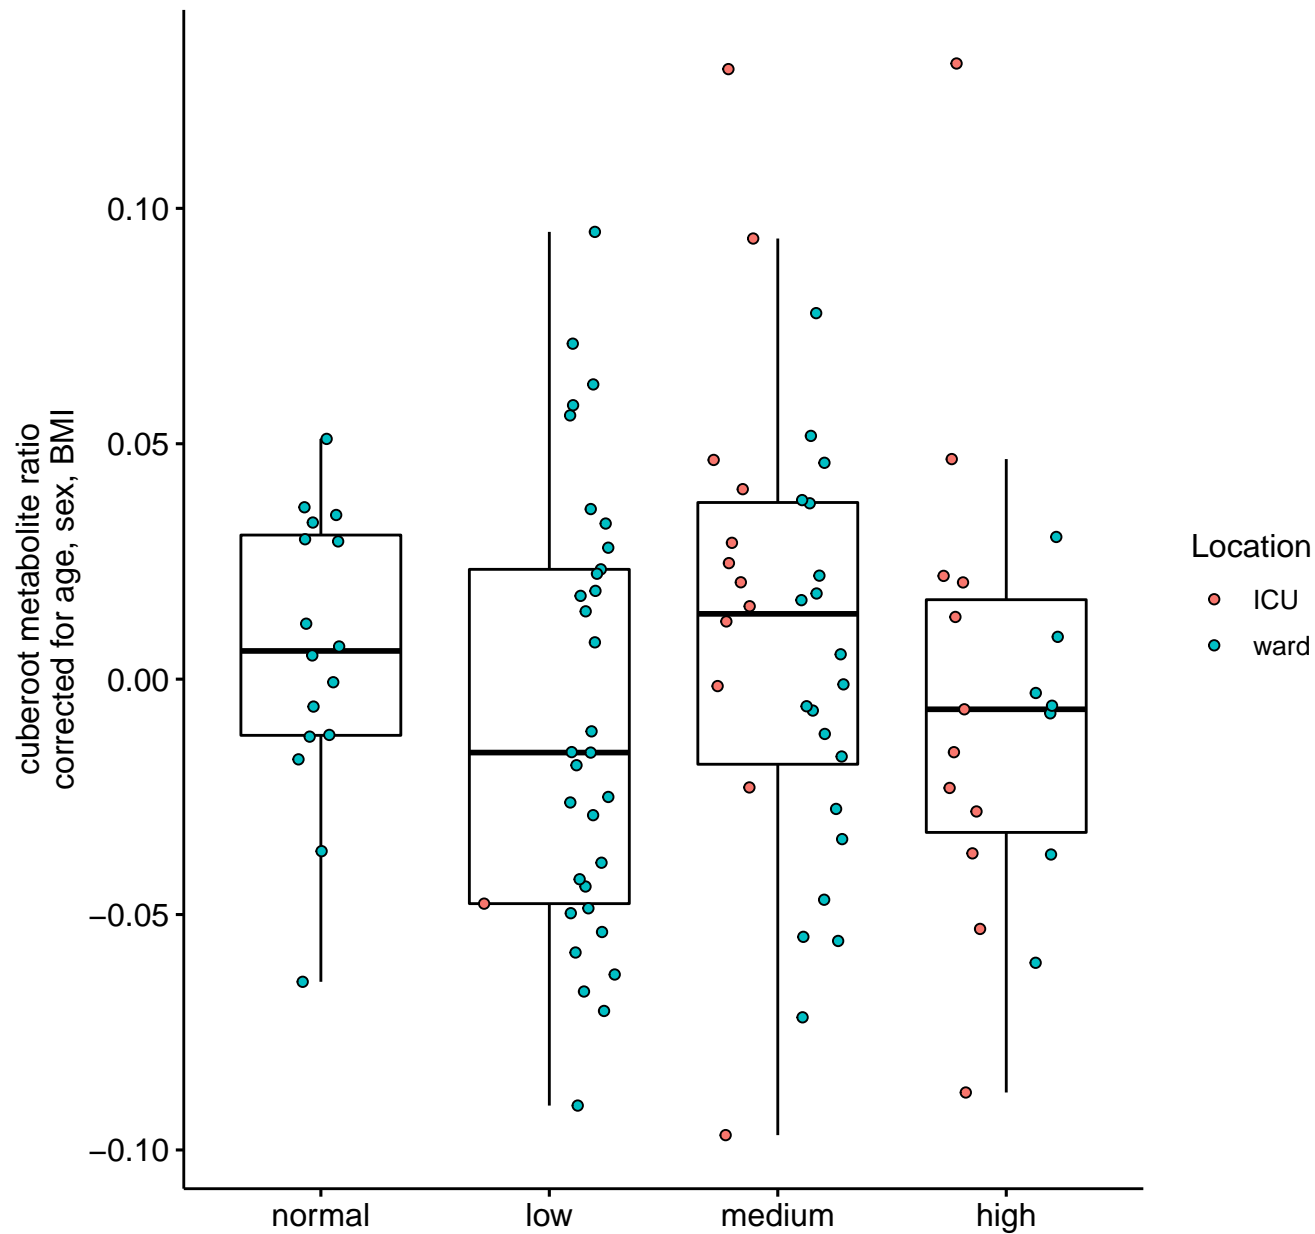

B\_cells

cube root metabolite ratio  
corrected for age, sex, BMI

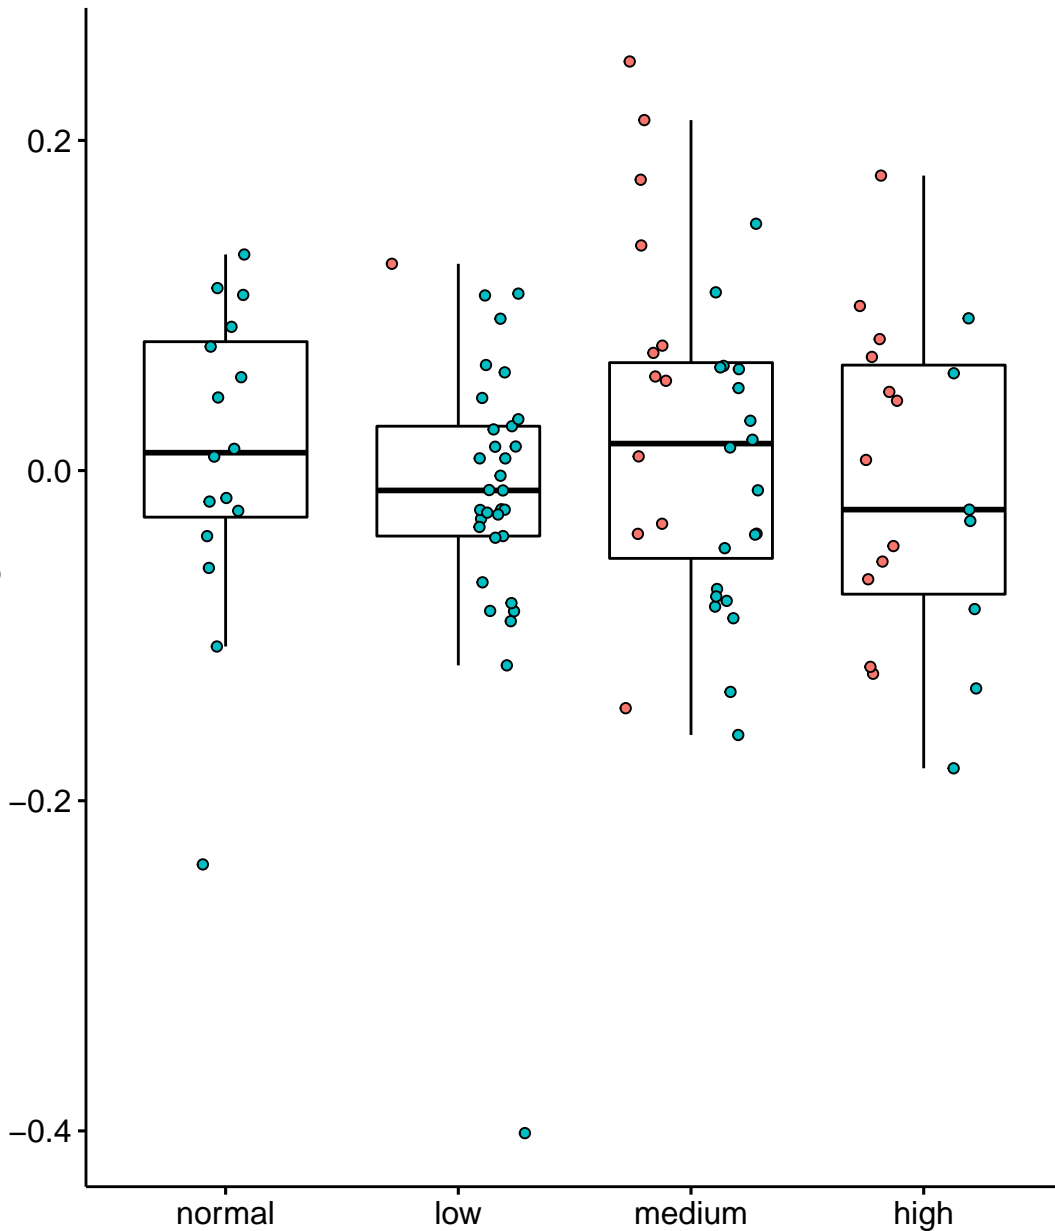

IL6Ra

cube root metabolite ratio  
corrected for age, sex, BMI

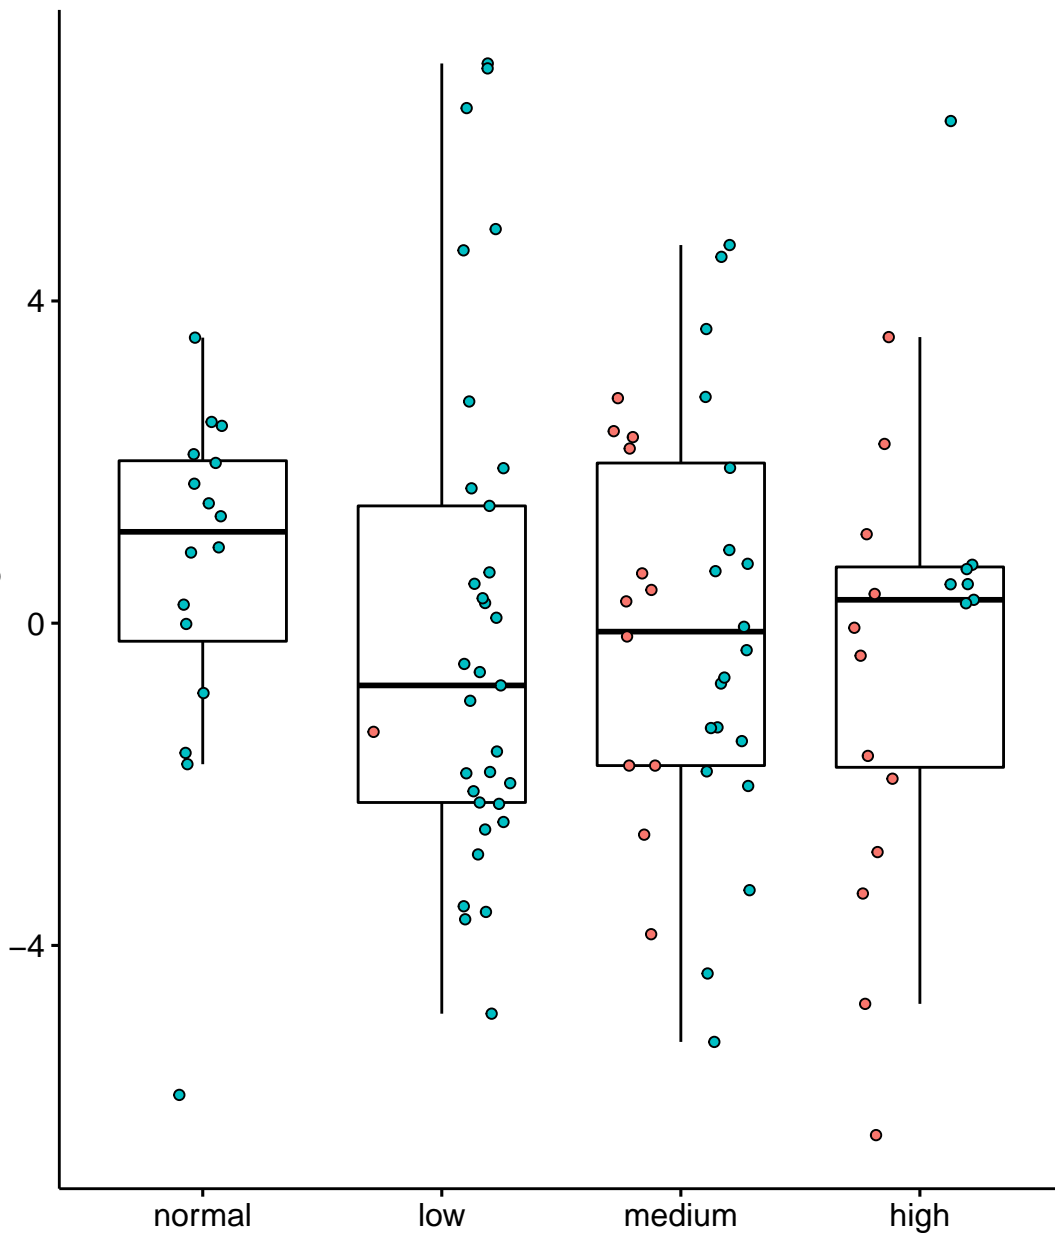

Location

ICU  
ward

IL1RA

cube root metabolite ratio  
corrected for age, sex, BMI

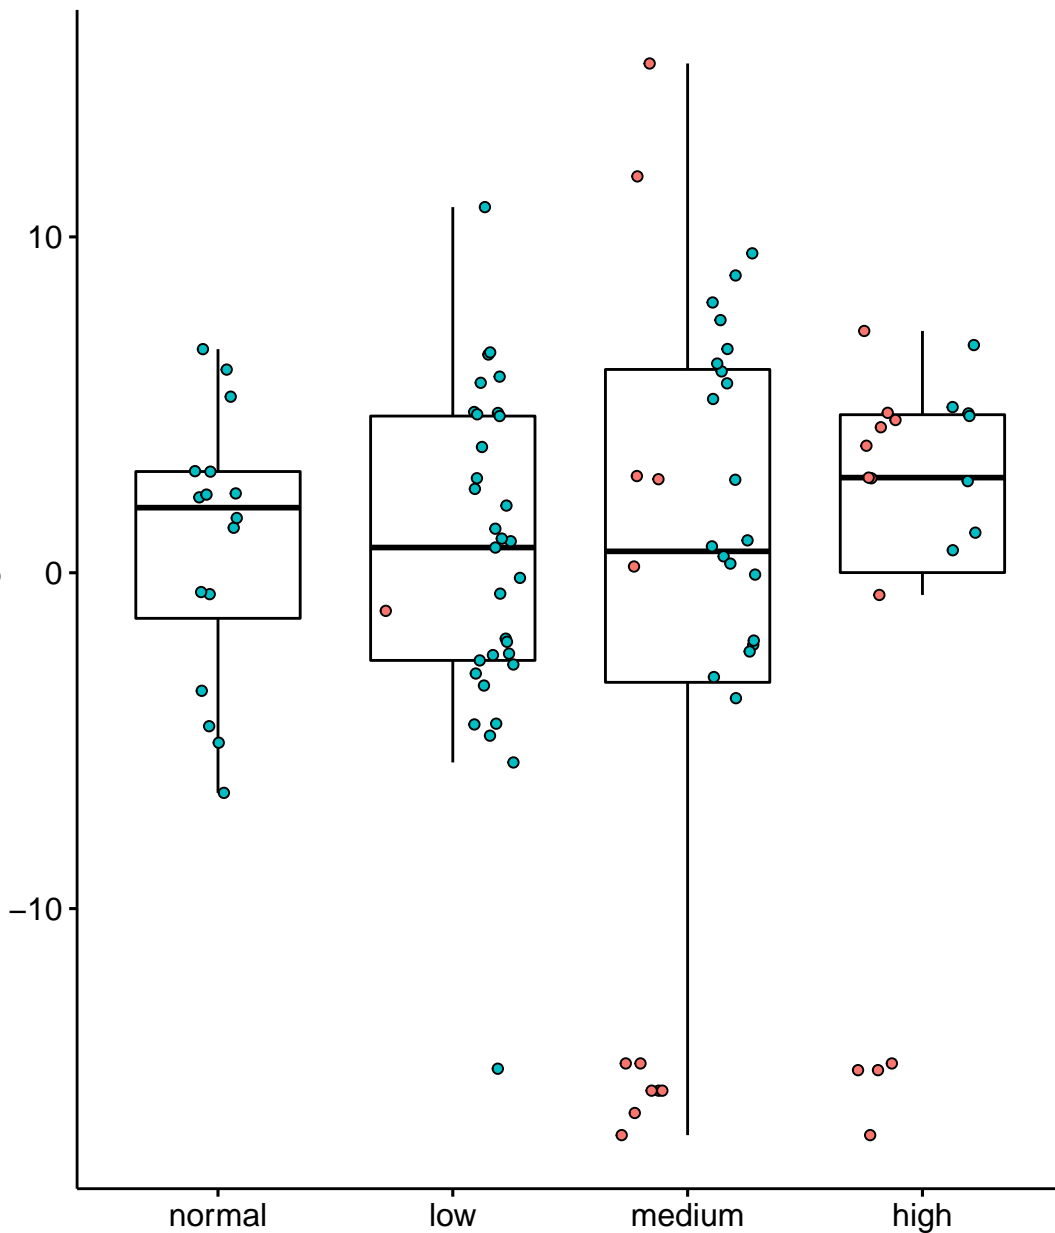

Location

ICU  
ward



TCRgd

cube root metabolite ratio  
corrected for age, sex, BMI

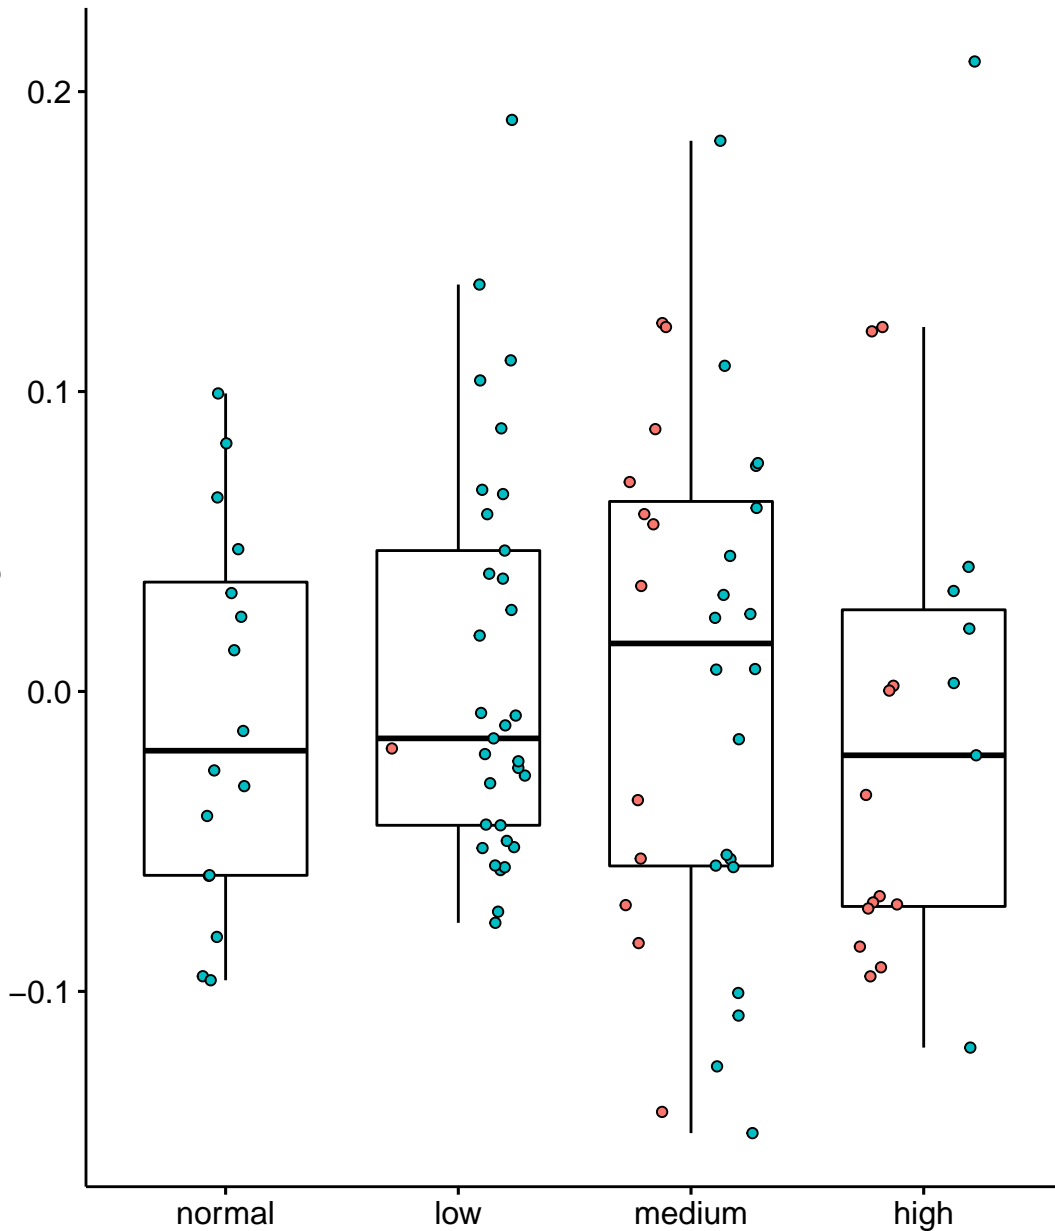

# DL.3.aminoisobutyric.acid\_amines

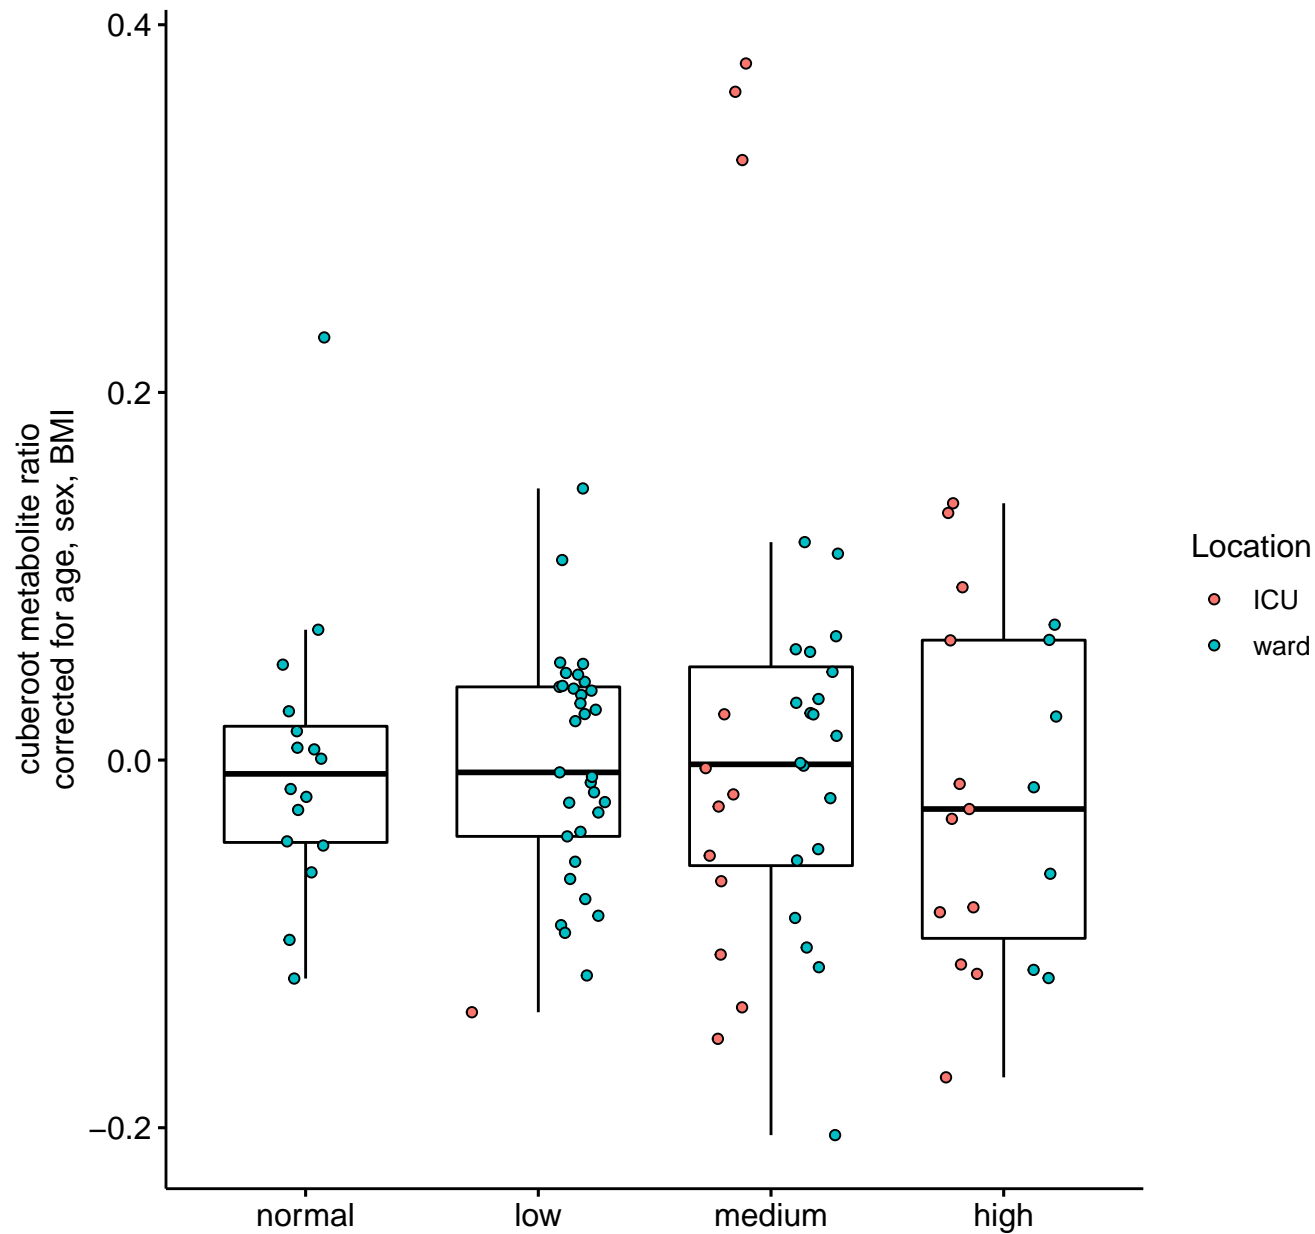

# L.Valine\_amines

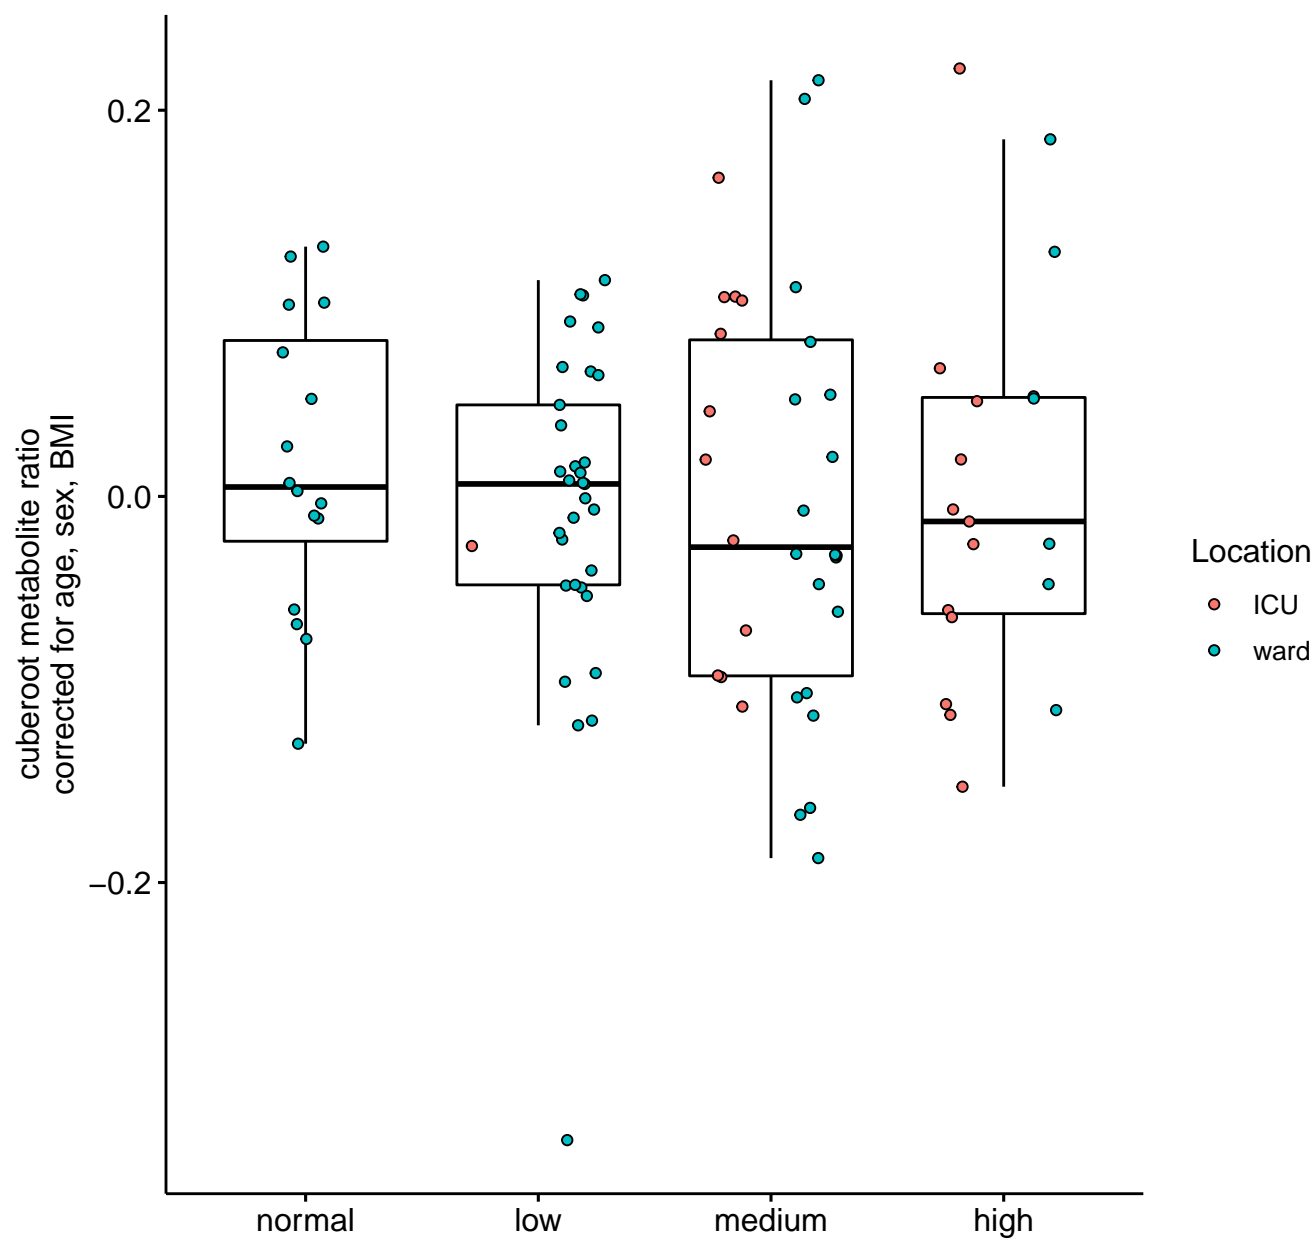

# L.Leucine\_amines

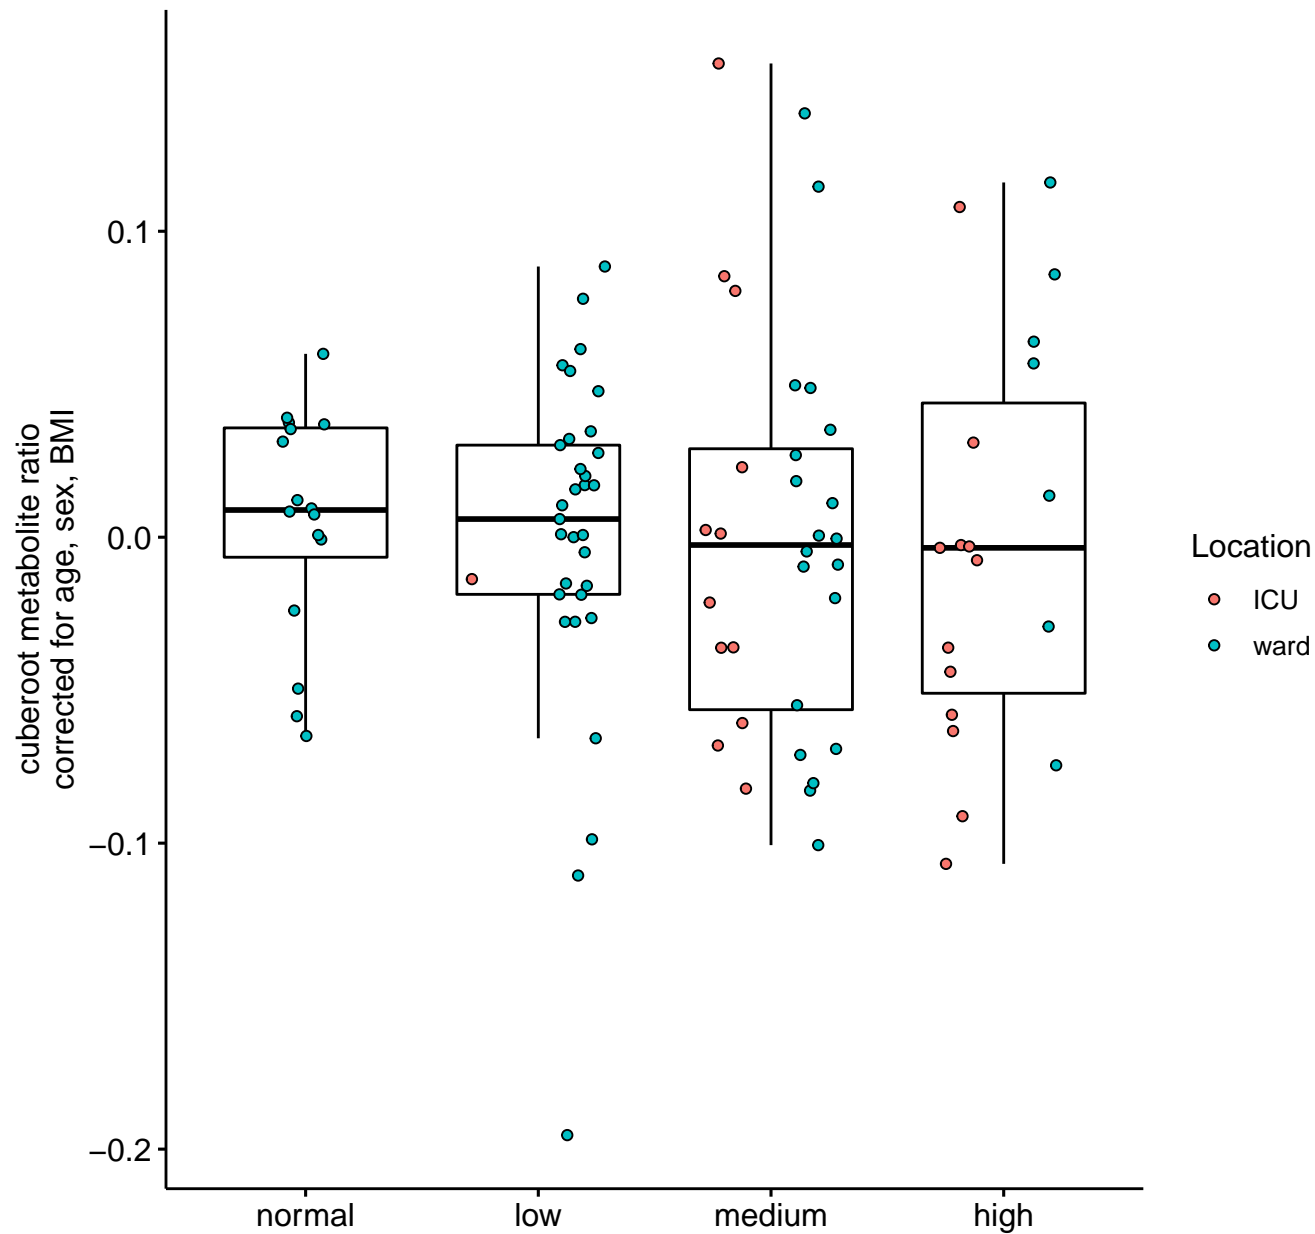

# L.Homoserine\_amines

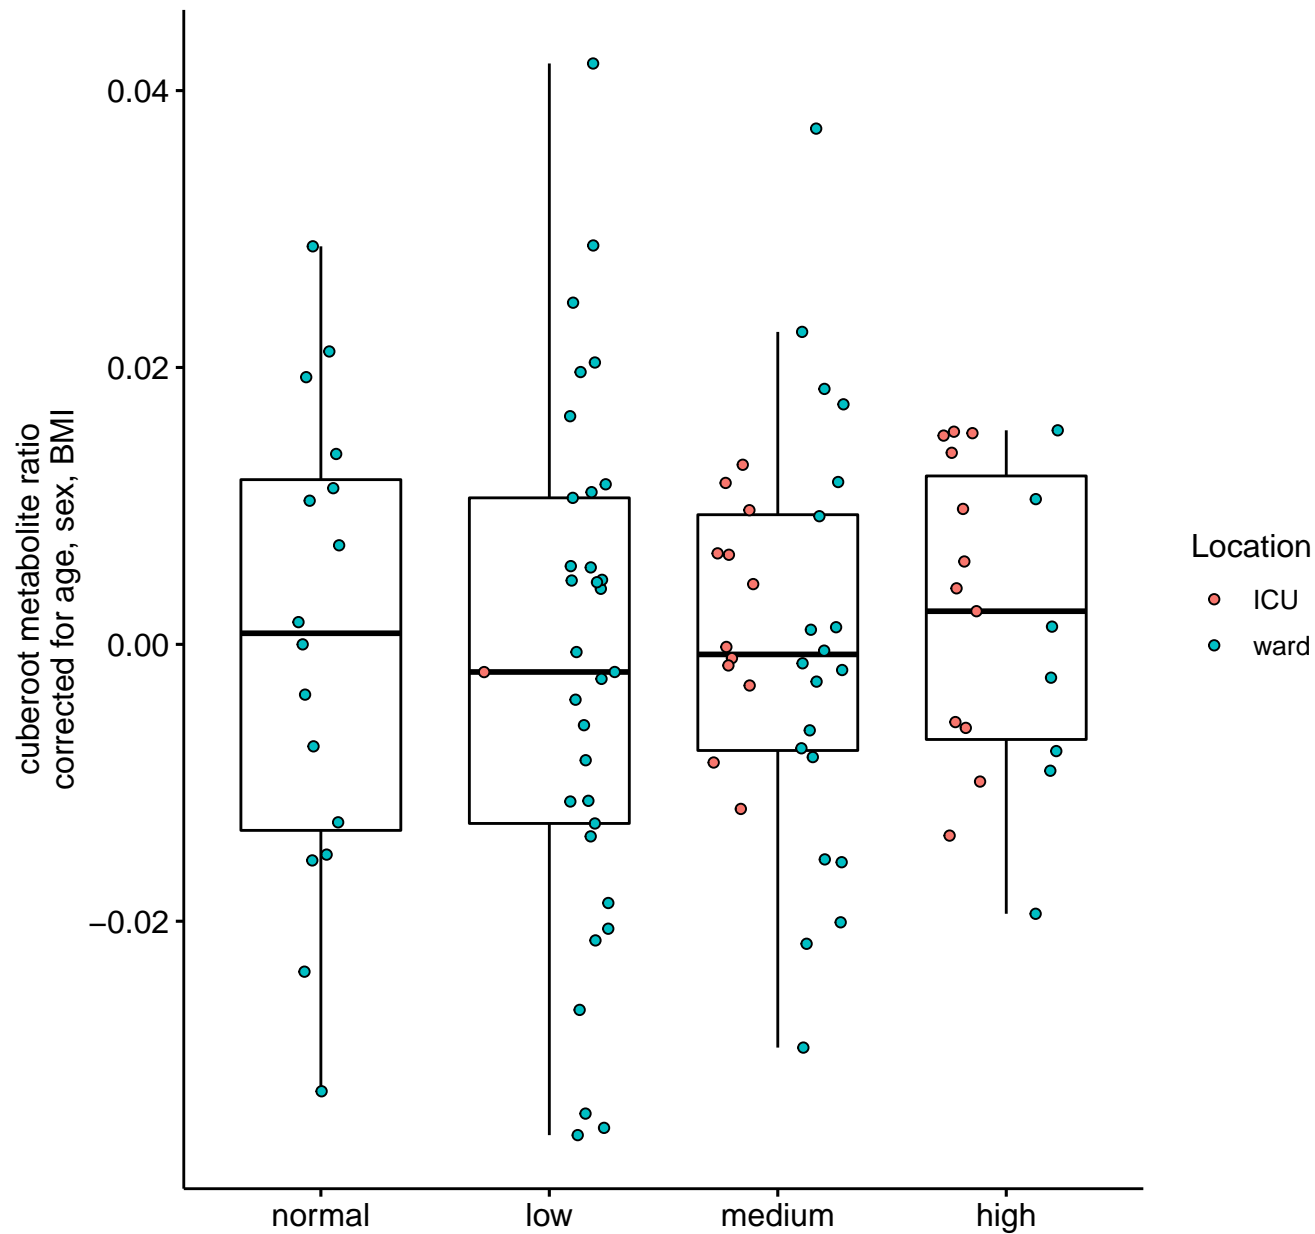

# L.Isoleucine\_amines

cube root metabolite ratio  
corrected for age, sex, BMI

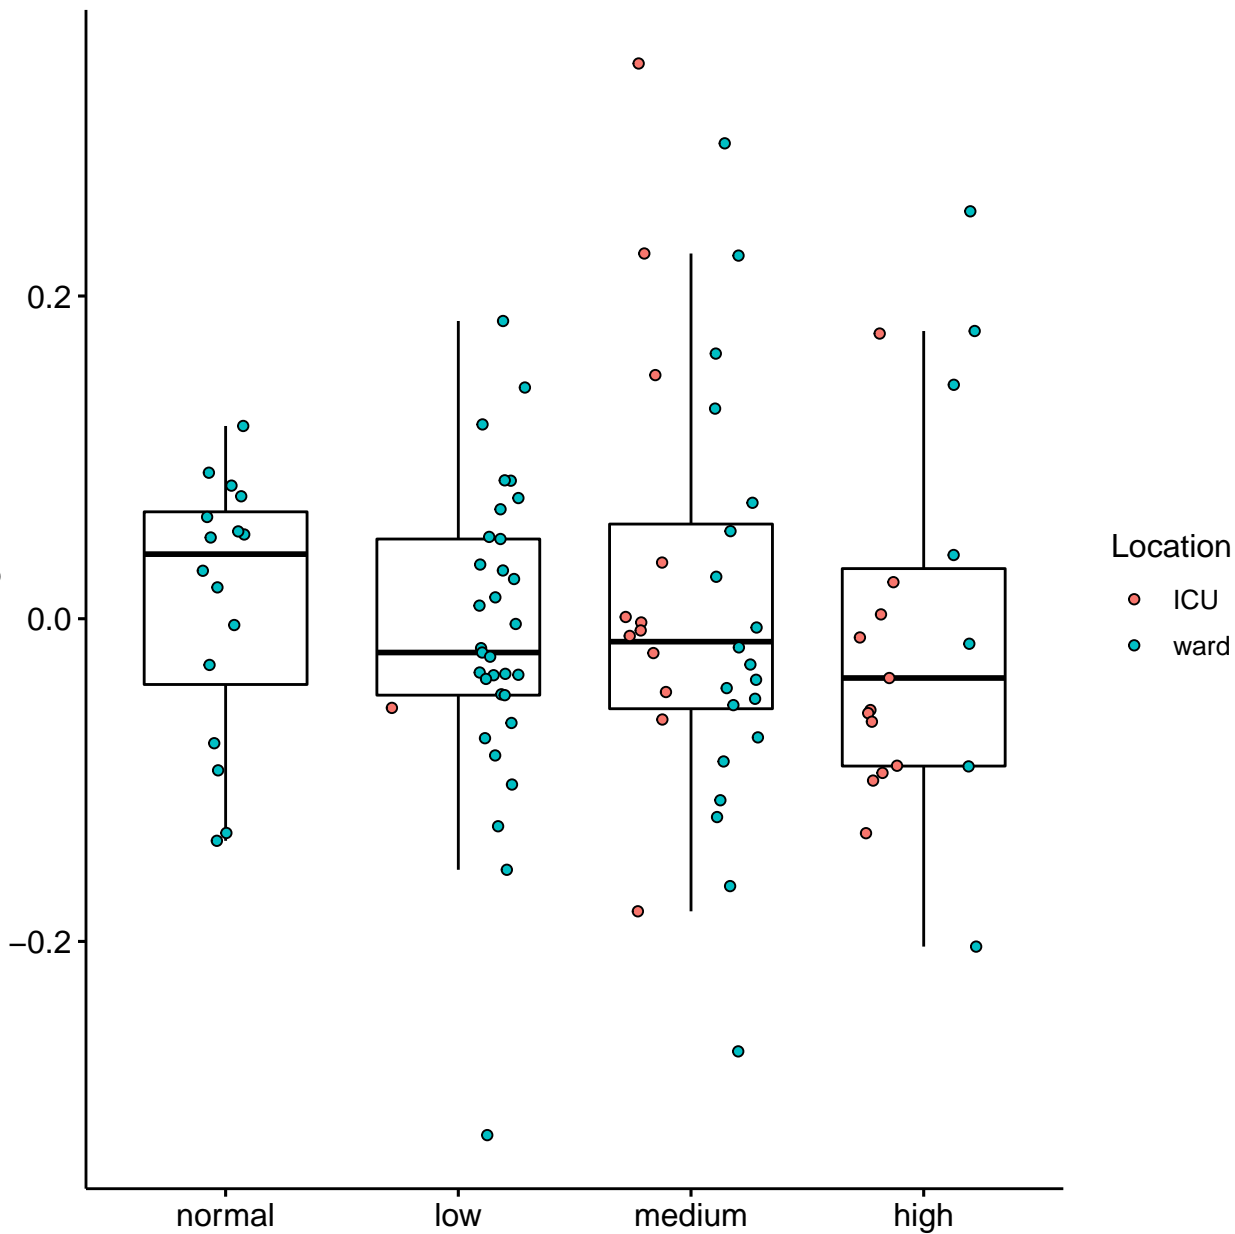

IL7

cuberoot metabolite ratio  
corrected for age, sex, BMI

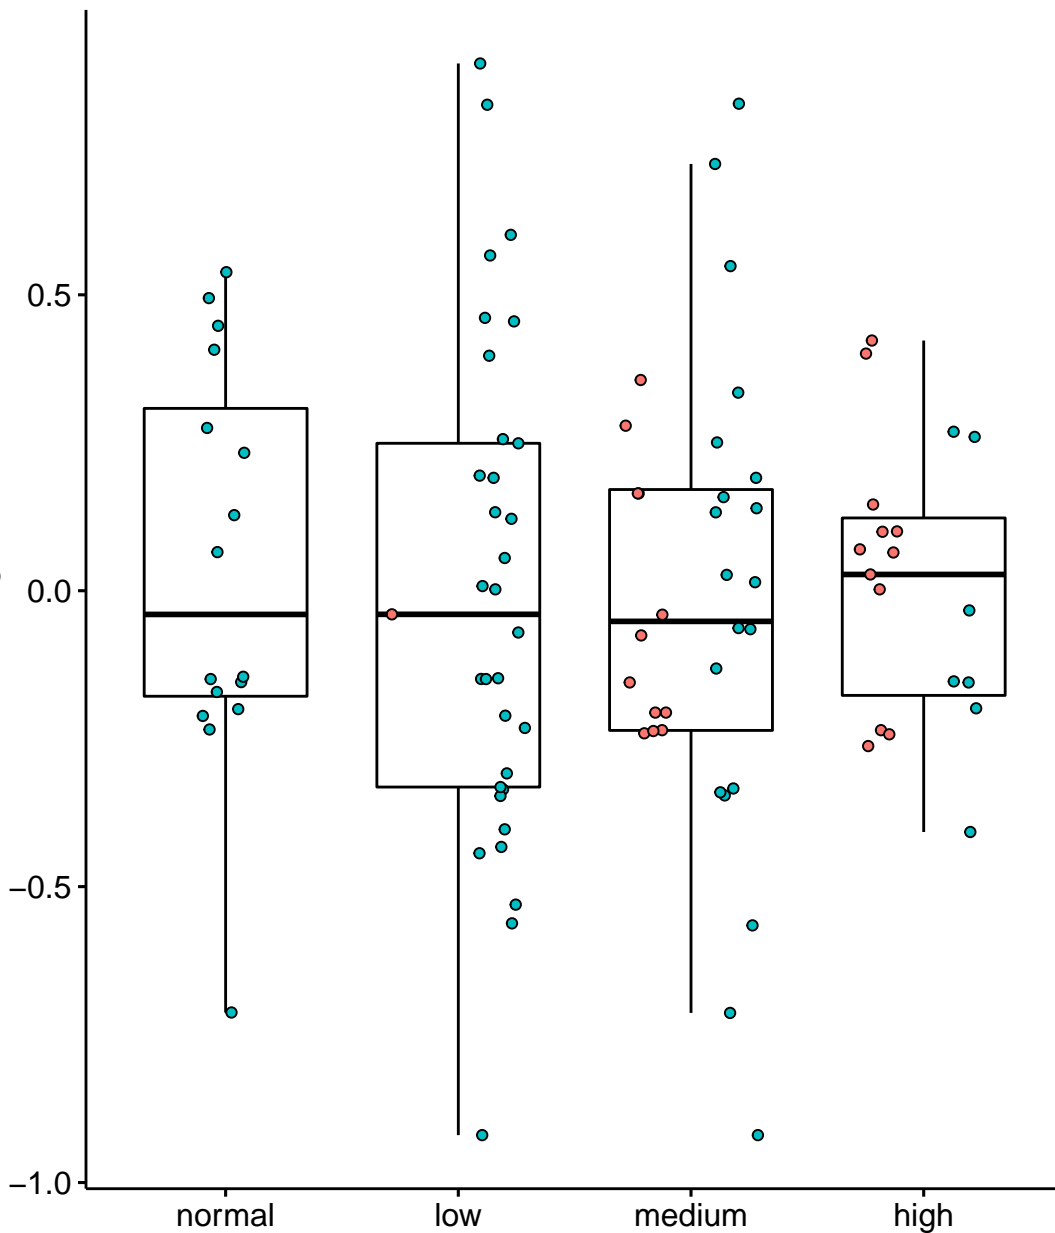

Location

ICU  
ward

IL8

cube root metabolite ratio  
corrected for age, sex, BMI

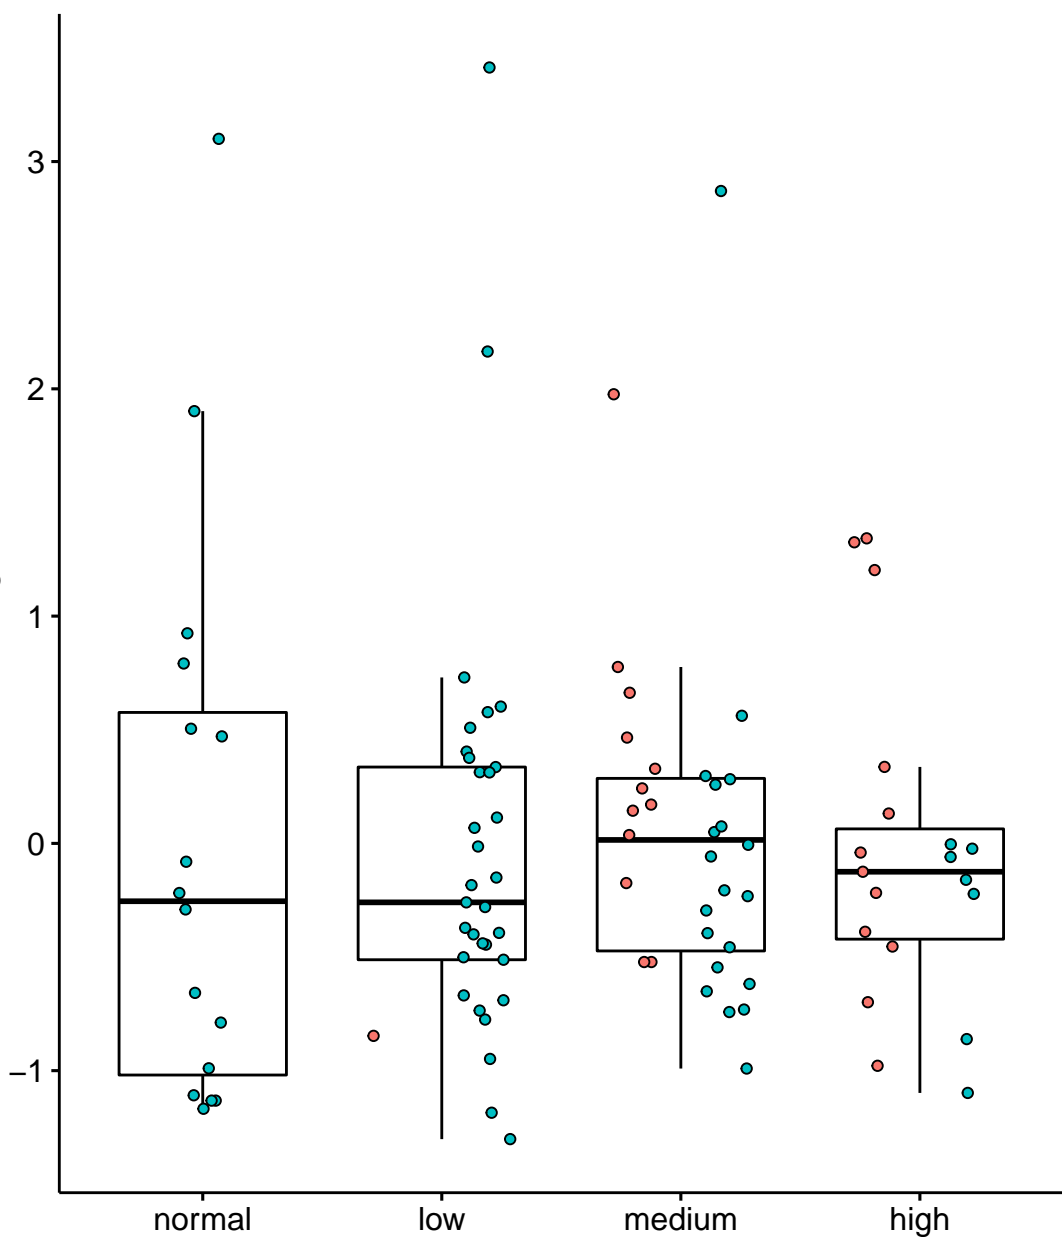

Location

- ICU
- ward
